# Supplementary material
Source: MDPI journal article supplement (https://www.mdpi.com/2304-6740/6/4/107)

# checkCIF/PLATON report

Structure factors have been supplied for datablock(s) si302a

THIS REPORT IS FOR GUIDANCE ONLY. IF USED AS PART OF A REVIEW PROCEDURE FOR PUBLICATION, IT SHOULD NOT REPLACE THE EXPERTISE OF AN EXPERIENCED CRYSTALLOGRAPHIC REFEREE.

No syntax errors found.      CIF dictionary      Interpreting this report

## Datablock: si302a

---

Bond precision:    C-C = 0.0037 A                      Wavelength=0.71073

Cell:                a=11.5327(18)            b=17.883(3)            c=21.560(3)  
                      alpha=69.416(2)        beta=85.458(2)        gamma=76.379(2)

Temperature:        100 K

|                | Calculated                   | Reported         |
|----------------|------------------------------|------------------|
| Volume         | 4045.5(11)                   | 4045.5(11)       |
| Space group    | P -1                         | P -1             |
| Hall group     | -P 1                         | -P 1             |
| Moiety formula | 2(C48 H116 Si16), 5(C7 H8) ? |                  |
| Sum formula    | C131 H272 Si32               | C65.50 H136 Si16 |
| Mr             | 2746.38                      | 1373.17          |
| Dx,g cm-3      | 1.127                        | 1.127            |
| Z              | 1                            | 2                |
| Mu (mm-1)      | 0.287                        | 0.287            |
| F000           | 1506.0                       | 1506.0           |
| F000'          | 1508.85                      |                  |
| h,k,lmax       | 14,22,27                     | 14,22,27         |
| Nref           | 16793                        | 16153            |
| Tmin,Tmax      | 0.944,0.972                  | 0.692,0.746      |
| Tmin'          | 0.944                        |                  |

Correction method= # Reported T Limits: Tmin=0.692 Tmax=0.746  
AbsCorr = EMPIRICAL

Data completeness= 0.962                      Theta(max)= 26.500

R(reflections)= 0.0357( 13586)            wR2(reflections)= 0.0941( 16153)

S = 1.037                                      Npar= 803

---

The following ALERTS were generated. Each ALERT has the format

**test-name\_ALERT\_alert-type\_alert-level.**

Click on the hyperlinks for more details of the test.

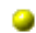

### Alert level C

|                   |                                             |                           |       |        |
|-------------------|---------------------------------------------|---------------------------|-------|--------|
| PLAT029_ALERT_3_C | _diffn_measured_fraction_theta_full         | value Low                 | 0.972 | Why?   |
| PLAT220_ALERT_2_C | Non-Solvent Resd 1                          | C Ueq(max)/Ueq(min) Range | 3.1   | Ratio  |
| PLAT223_ALERT_4_C | Solv./Anion Resd 4                          | H Ueq(max)/Ueq(min) Range | 4.3   | Ratio  |
| PLAT250_ALERT_2_C | Large U3/U1 Ratio for Average U(i,j) Tensor | ....                      | 2.8   | Note   |
| PLAT250_ALERT_2_C | Large U3/U1 Ratio for Average U(i,j) Tensor | ....                      | 3.1   | Note   |
| PLAT911_ALERT_3_C | Missing FCF Refl Between Thmin & STh/L=     | 0.600                     | 406   | Report |
| PLAT977_ALERT_2_C | Check Negative Difference Density on H17    |                           | -0.33 | eA-3   |

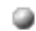

### Alert level G

|                   |                                                  |                |       |        |
|-------------------|--------------------------------------------------|----------------|-------|--------|
| PLAT002_ALERT_2_G | Number of Distance or Angle Restraints on AtSite |                | 7     | Note   |
| PLAT003_ALERT_2_G | Number of Uiso or Uij Restrained non-H Atoms ... |                | 7     | Report |
| PLAT045_ALERT_1_G | Calculated and Reported Z Differ by a Factor ... |                | 0.50  | Check  |
| PLAT154_ALERT_1_G | The s.u.'s on the Cell Angles are Equal ..(Note) |                | 0.002 | Degree |
| PLAT172_ALERT_4_G | The CIF-Embedded .res File Contains DFIX Records |                | 3     | Report |
| PLAT178_ALERT_4_G | The CIF-Embedded .res File Contains SIMU Records |                | 1     | Report |
| PLAT186_ALERT_4_G | The CIF-Embedded .res File Contains ISOR Records |                | 1     | Report |
| PLAT300_ALERT_4_G | Atom Site Occupancy of C62                       | Constrained at | 0.5   | Check  |
| PLAT300_ALERT_4_G | Atom Site Occupancy of C63                       | Constrained at | 0.5   | Check  |
| PLAT300_ALERT_4_G | Atom Site Occupancy of C64                       | Constrained at | 0.5   | Check  |
| PLAT300_ALERT_4_G | Atom Site Occupancy of C65                       | Constrained at | 0.5   | Check  |
| PLAT300_ALERT_4_G | Atom Site Occupancy of C66                       | Constrained at | 0.5   | Check  |
| PLAT300_ALERT_4_G | Atom Site Occupancy of C67                       | Constrained at | 0.5   | Check  |
| PLAT300_ALERT_4_G | Atom Site Occupancy of C68                       | Constrained at | 0.5   | Check  |
| PLAT300_ALERT_4_G | Atom Site Occupancy of H133                      | Constrained at | 0.5   | Check  |
| PLAT300_ALERT_4_G | Atom Site Occupancy of H134                      | Constrained at | 0.5   | Check  |
| PLAT300_ALERT_4_G | Atom Site Occupancy of H135                      | Constrained at | 0.5   | Check  |
| PLAT300_ALERT_4_G | Atom Site Occupancy of H136                      | Constrained at | 0.5   | Check  |
| PLAT300_ALERT_4_G | Atom Site Occupancy of H137                      | Constrained at | 0.5   | Check  |
| PLAT300_ALERT_4_G | Atom Site Occupancy of H138                      | Constrained at | 0.5   | Check  |
| PLAT300_ALERT_4_G | Atom Site Occupancy of H139                      | Constrained at | 0.5   | Check  |
| PLAT300_ALERT_4_G | Atom Site Occupancy of H140                      | Constrained at | 0.5   | Check  |
| PLAT302_ALERT_4_G | Anion/Solvent/Minor-Residue Disorder (Resd 4 )   |                | 100%  | Note   |
| PLAT304_ALERT_4_G | Non-Integer Number of Atoms in ..... Resd 4      |                | 7.50  | Check  |
| PLAT380_ALERT_4_G | Incorrectly? Oriented X(sp2)-Methyl Moiety ..... |                | C55   | Check  |
| PLAT380_ALERT_4_G | Incorrectly? Oriented X(sp2)-Methyl Moiety ..... |                | C69   | Check  |
| PLAT789_ALERT_4_G | Atoms with Negative _atom_site_disorder_group #  |                | 15    | Check  |
| PLAT793_ALERT_4_G | Model has Chirality at Si5                       | (Centro SPGR)  | S     | Verify |
| PLAT793_ALERT_4_G | Model has Chirality at Si7                       | (Centro SPGR)  | R     | Verify |
| PLAT860_ALERT_3_G | Number of Least-Squares Restraints .....         |                | 93    | Note   |
| PLAT910_ALERT_3_G | Missing # of FCF Reflection(s) Below Theta(Min). |                | 3     | Note   |
| PLAT912_ALERT_4_G | Missing # of FCF Reflections Above STh/L=        | 0.600          | 231   | Note   |
| PLAT933_ALERT_2_G | Number of OMIT Records in Embedded .res File ... |                | 8     | Note   |
| PLAT960_ALERT_3_G | Number of Intensities with I < - 2*sig(I) ...    |                | 25    | Check  |
| PLAT978_ALERT_2_G | Number C-C Bonds with Positive Residual Density. |                | 3     | Info   |

- 0 **ALERT level A** = Most likely a serious problem - resolve or explain  
0 **ALERT level B** = A potentially serious problem, consider carefully  
7 **ALERT level C** = Check. Ensure it is not caused by an omission or oversight  
35 **ALERT level G** = General information/check it is not something unexpected

- 2 **ALERT type 1** CIF construction/syntax error, inconsistent or missing data  
8 **ALERT type 2** Indicator that the structure model may be wrong or deficient  
5 **ALERT type 3** Indicator that the structure quality may be low  
27 **ALERT type 4** Improvement, methodology, query or suggestion  
0 **ALERT type 5** Informative message, check

It is advisable to attempt to resolve as many as possible of the alerts in all categories. Often the minor alerts point to easily fixed oversights, errors and omissions in your CIF or refinement strategy, so attention to these fine details can be worthwhile. In order to resolve some of the more serious problems it may be necessary to carry out additional measurements or structure refinements. However, the purpose of your study may justify the reported deviations and the more serious of these should normally be commented upon in the discussion or experimental section of a paper or in the "special\_details" fields of the CIF. checkCIF was carefully designed to identify outliers and unusual parameters, but every test has its limitations and alerts that are not important in a particular case may appear. Conversely, the absence of alerts does not guarantee there are no aspects of the results needing attention. It is up to the individual to critically assess their own results and, if necessary, seek expert advice.

### **Publication of your CIF in IUCr journals**

A basic structural check has been run on your CIF. These basic checks will be run on all CIFs submitted for publication in IUCr journals (*Acta Crystallographica*, *Journal of Applied Crystallography*, *Journal of Synchrotron Radiation*); however, if you intend to submit to *Acta Crystallographica Section C* or *E* or *IUCrData*, you should make sure that full publication checks are run on the final version of your CIF prior to submission.

### **Publication of your CIF in other journals**

Please refer to the *Notes for Authors* of the relevant journal for any special instructions relating to CIF submission.

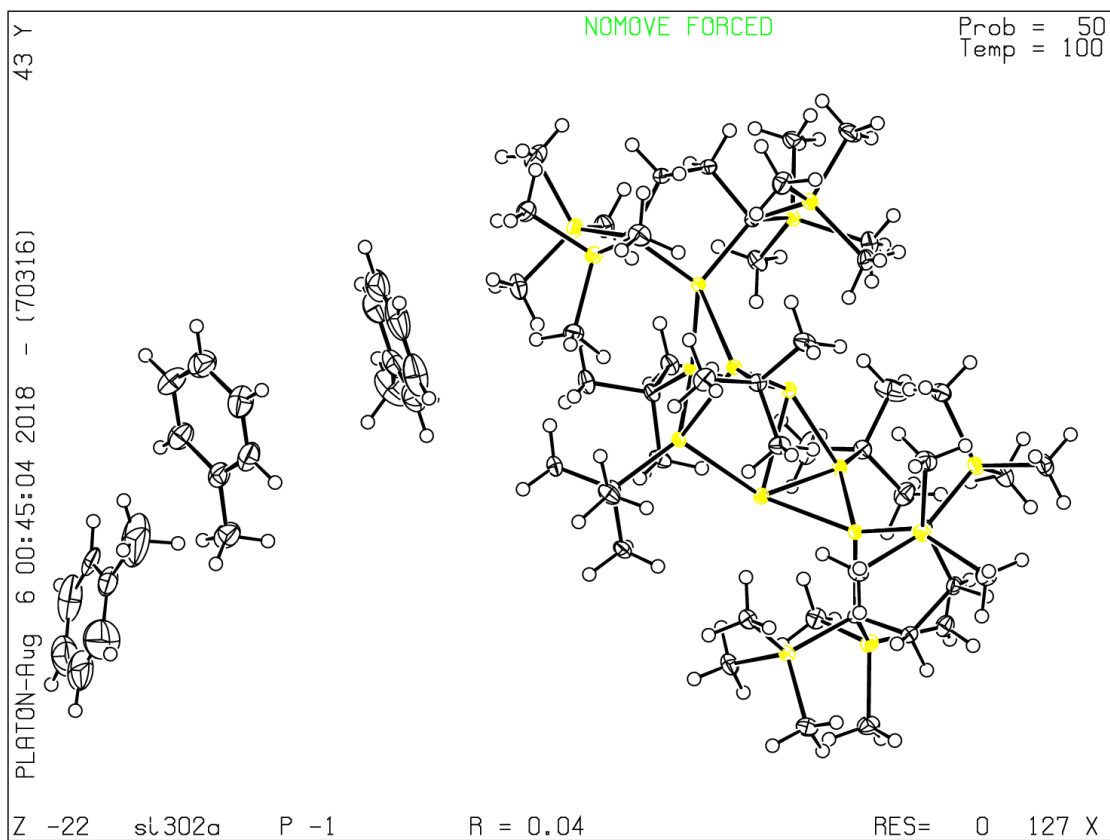

Supplement: s1 [file s1]
