# Supplementary material
Source: MDPI journal article supplement (https://www.mdpi.com/2304-6740/6/4/107)
Supplement: s1 [file s1]

# Supplementary Materials: Transformative Si<sub>8</sub>R<sub>8</sub> Siliconoids

Naohiko Akasaka, Shintaro Ishida and Takeaki Iwamoto \*

## Contents

|                                                                                          |           |
|------------------------------------------------------------------------------------------|-----------|
| <b>1. NMR Spectra .....</b>                                                              | <b>2</b>  |
| <b>2. Time Course of The Product Yields during Thermal Reaction of 7.....</b>            | <b>12</b> |
| <b>3. UV-vis Spectra .....</b>                                                           | <b>13</b> |
| Compound 7.....                                                                          | 13        |
| Compound 8.....                                                                          | 14        |
| Compound 9.....                                                                          | 15        |
| Si <sub>8</sub> R <sub>8</sub> isomers .....                                             | 16        |
| <b>4. DFT Calculations.....</b>                                                          | <b>16</b> |
| Calculated Transition Energies and Oscillator Strengths of the Electron Transitions..... | 17        |

## 1. NMR Spectra

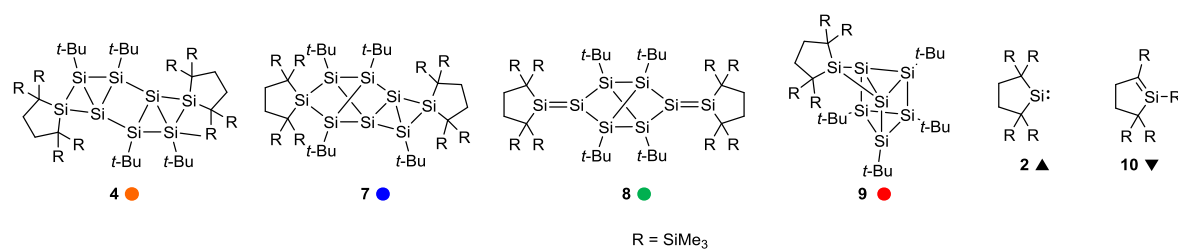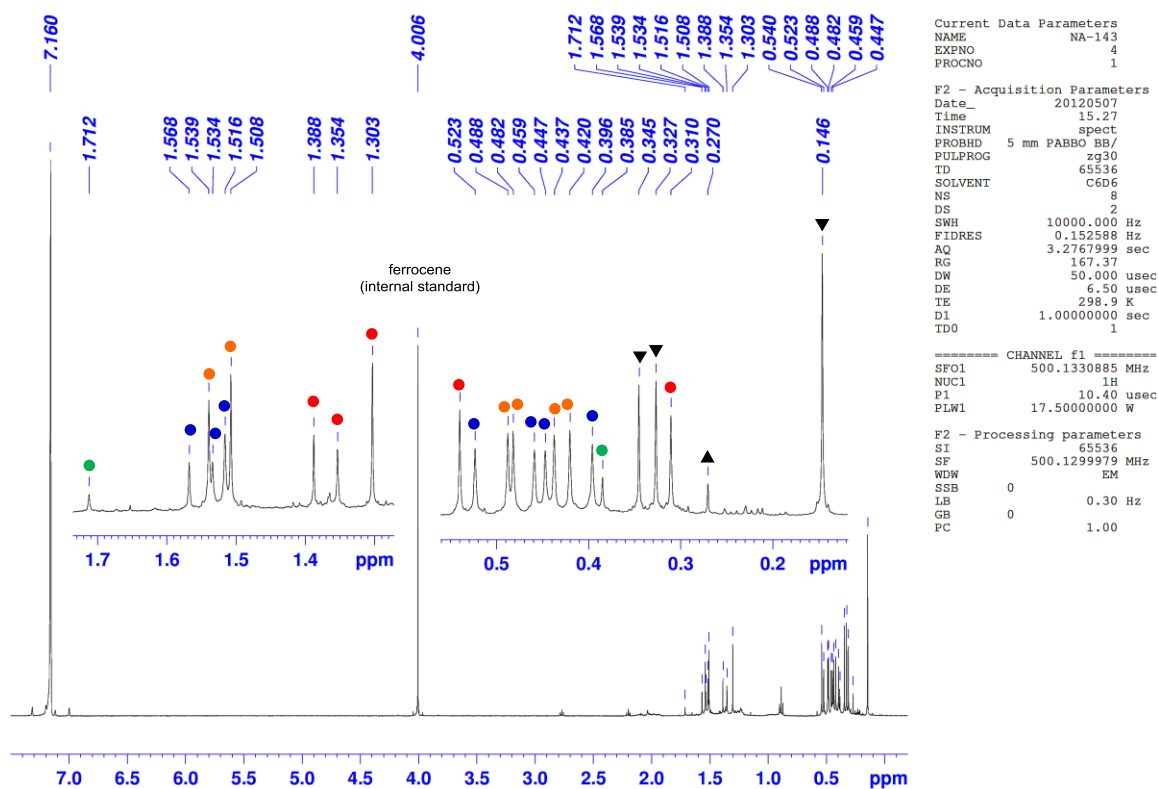

Figure S1. <sup>1</sup>H NMR spectrum of the reaction mixture after heating 4 for 3 h (C<sub>6</sub>D<sub>6</sub>, rt).

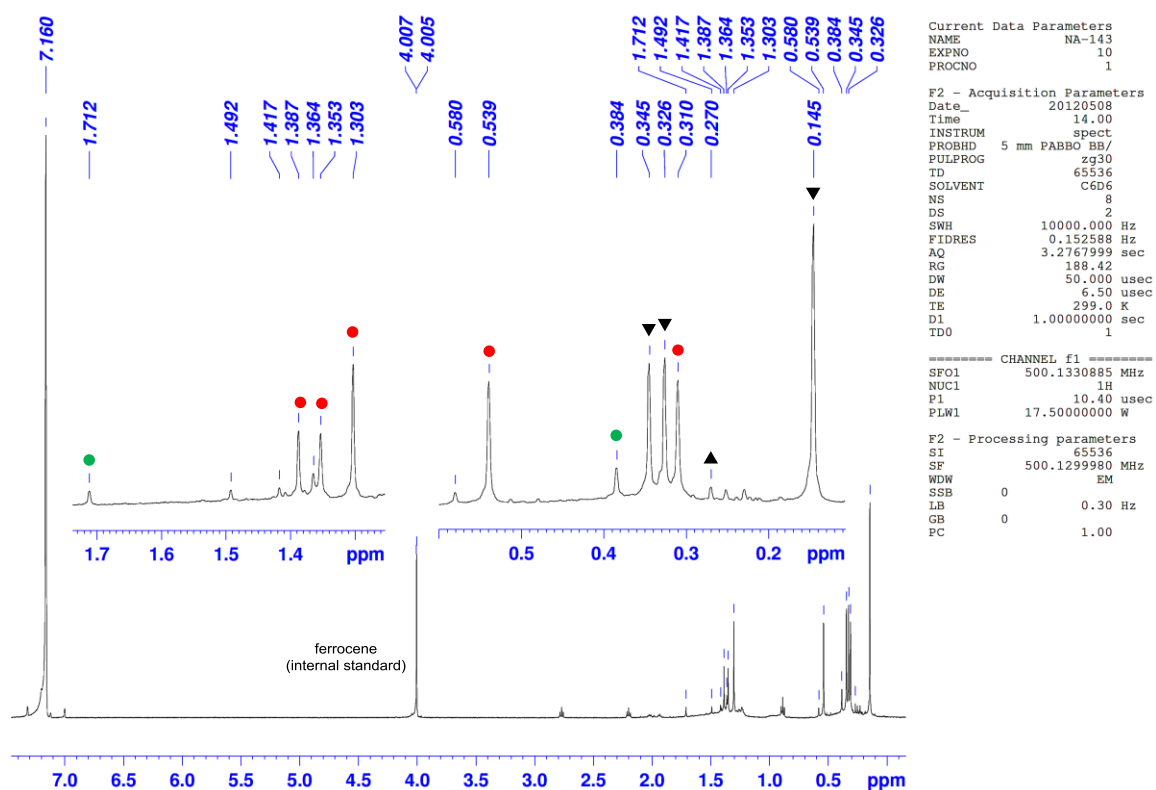

**Figure S2.**  $^1\text{H}$  NMR spectrum of the reaction mixture after heating **4** for 22 h ( $\text{C}_6\text{D}_6$ , rt).

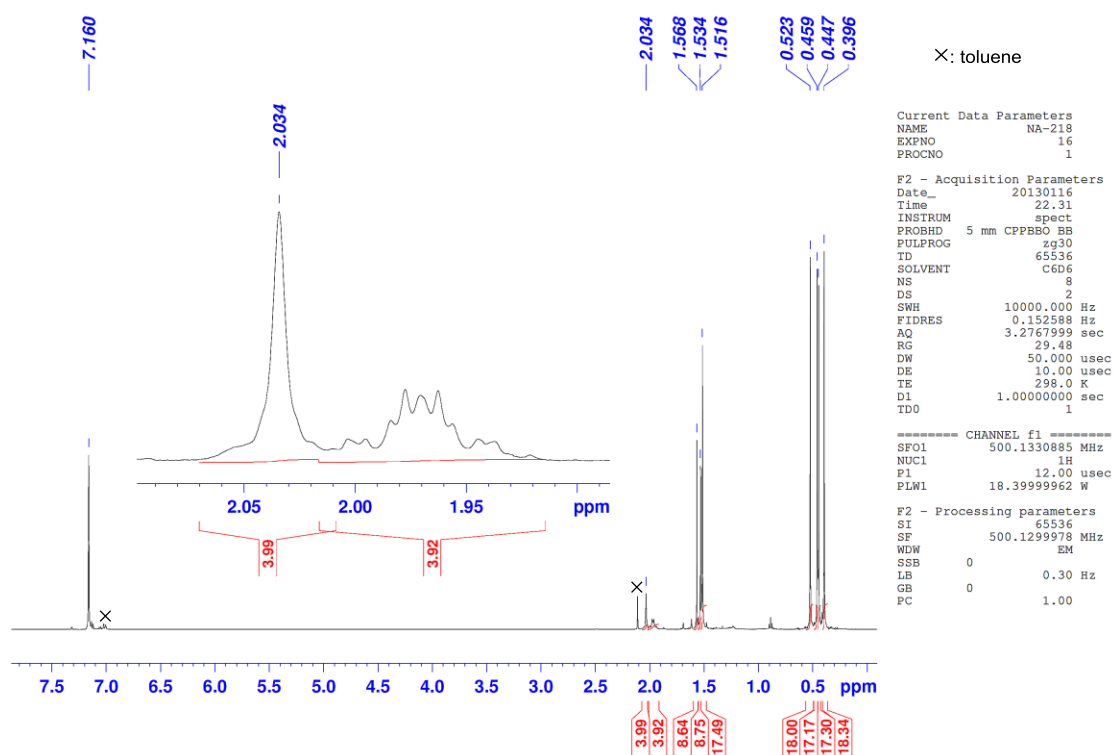Figure S3.  $^1\text{H}$  NMR spectrum of 7 in  $\text{C}_6\text{D}_6$  at rt.  $\times$  = toluene.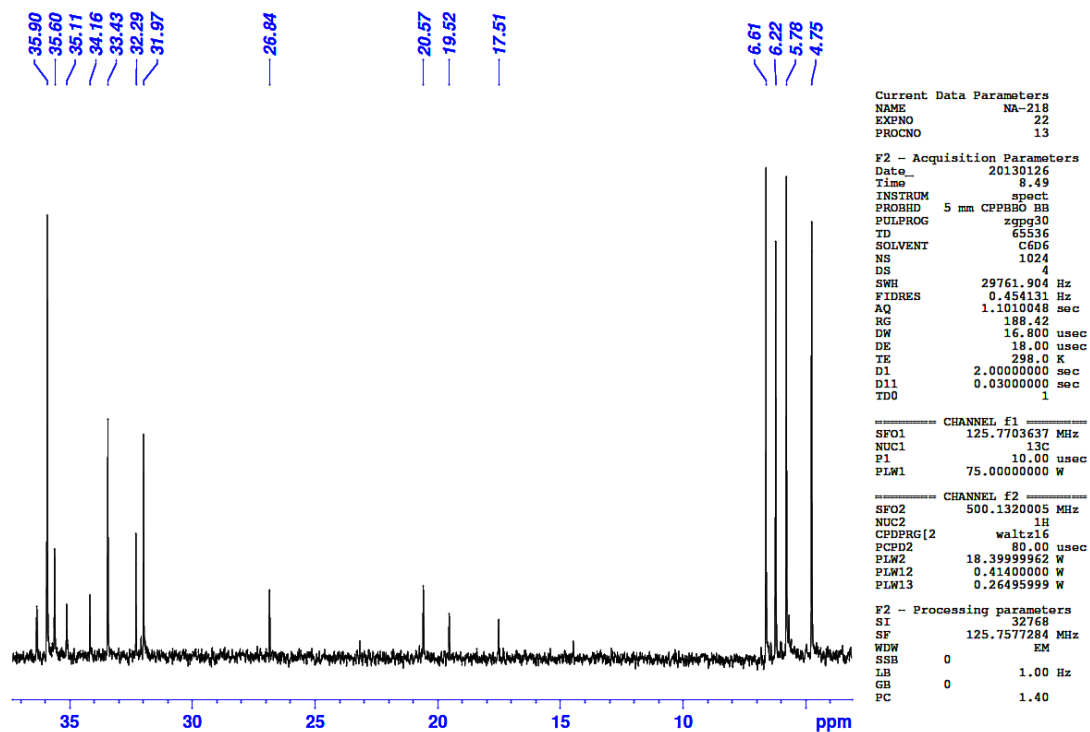Figure S4.  $^{13}\text{C}\{^1\text{H}\}$  NMR spectrum of 7 in  $\text{C}_6\text{D}_6$  at rt.

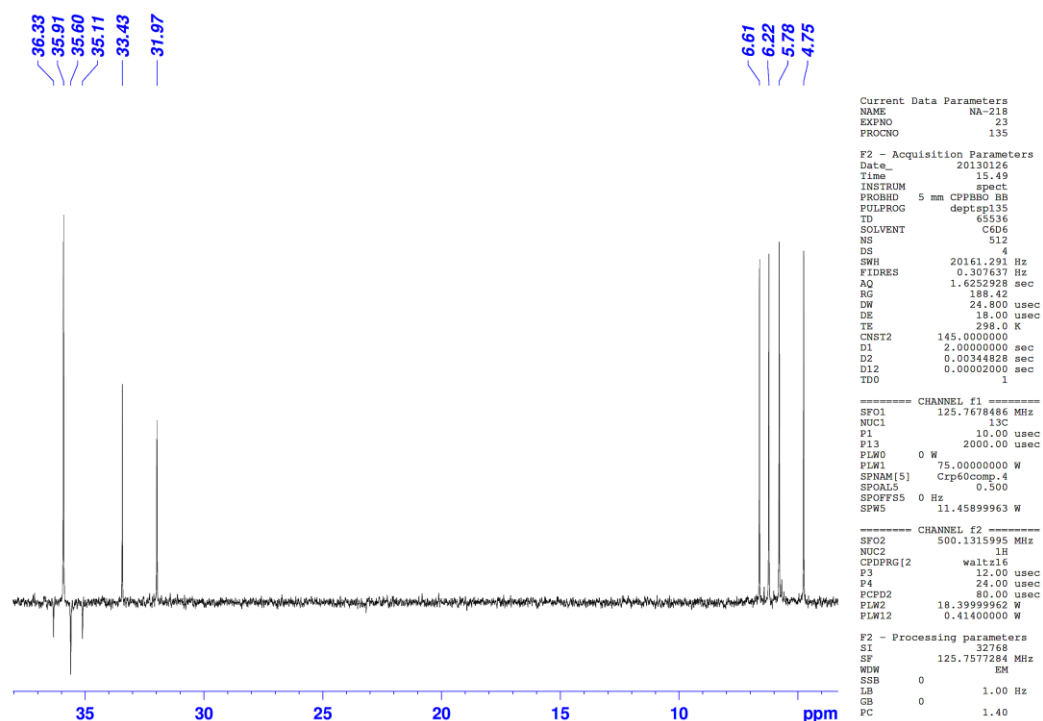

Figure S5.  $^{13}\text{C}\{^1\text{H}\}$  NMR spectrum of 7 using DEPT 135 pulse sequence in  $\text{C}_6\text{D}_6$  at rt.

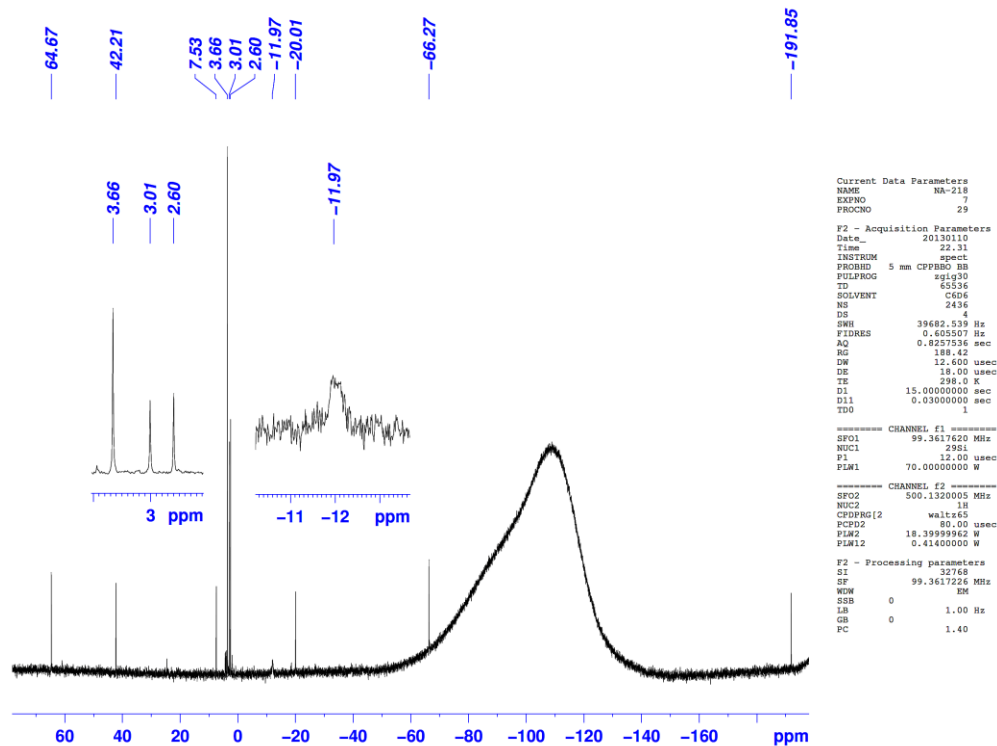

Figure S6.  $^{29}\text{Si}\{^1\text{H}\}$  NMR spectrum of 7 using the inverse-gated pulse sequence in  $\text{C}_6\text{D}_6$  at rt.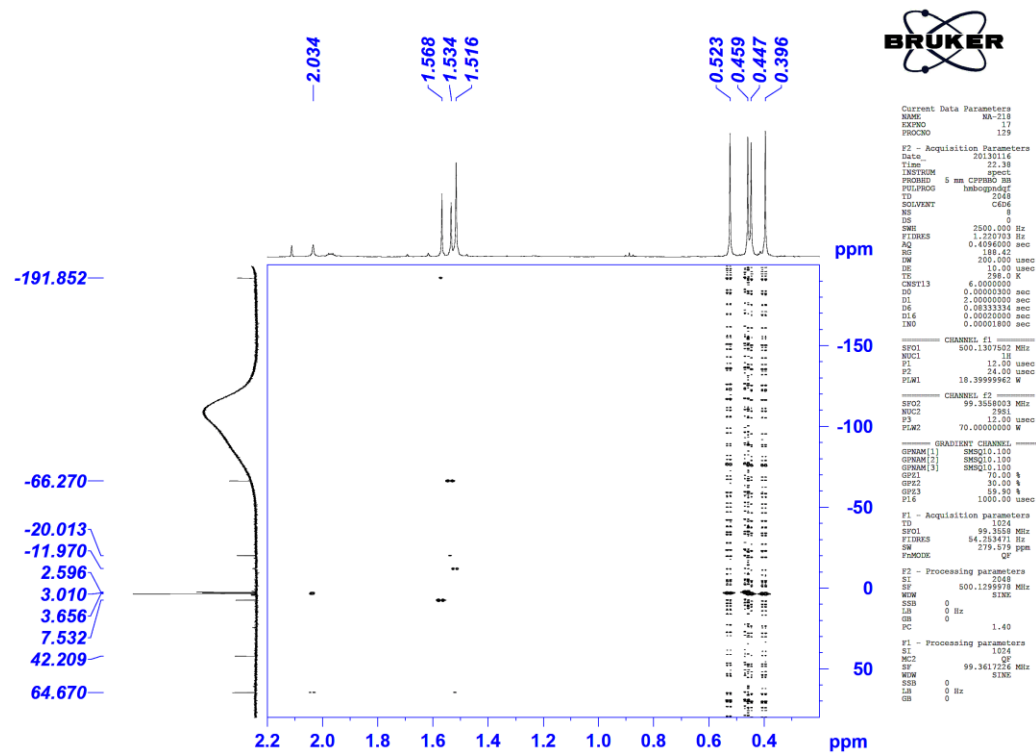Figure S7.  $^1\text{H}$ - $^{29}\text{Si}$  HMBC 2D NMR spectrum of 7 in  $\text{C}_6\text{D}_6$  at rt.

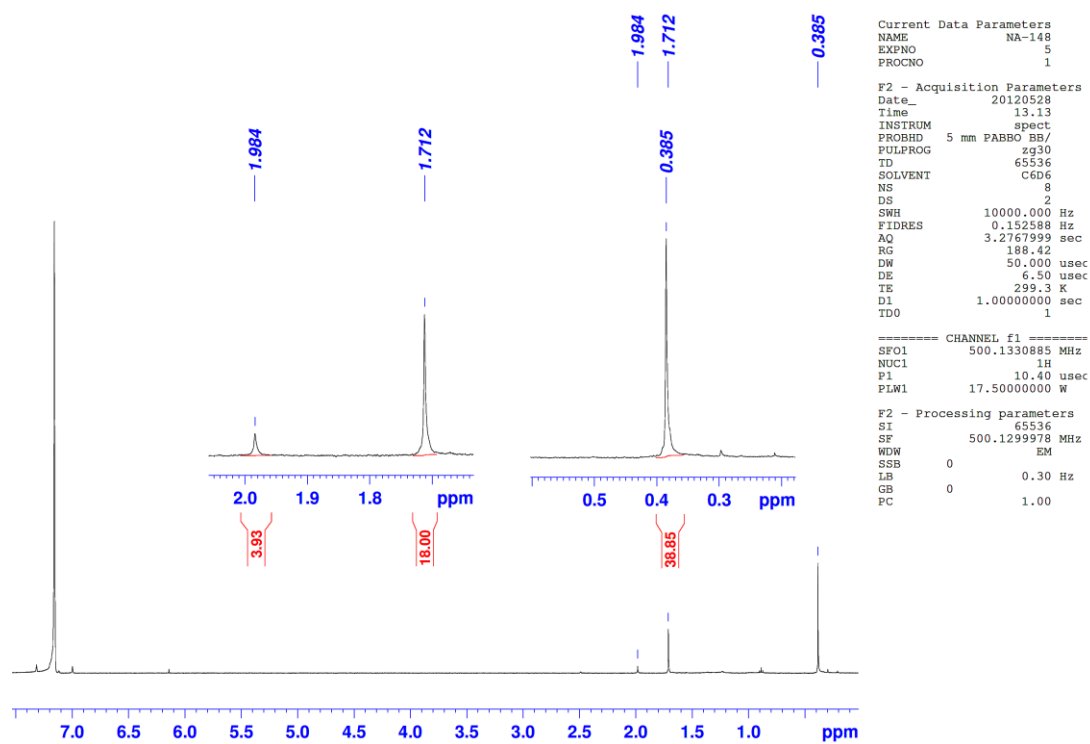

Figure S8.  $^1\text{H}$  NMR spectrum of **8** in  $\text{C}_6\text{D}_6$  at rt.

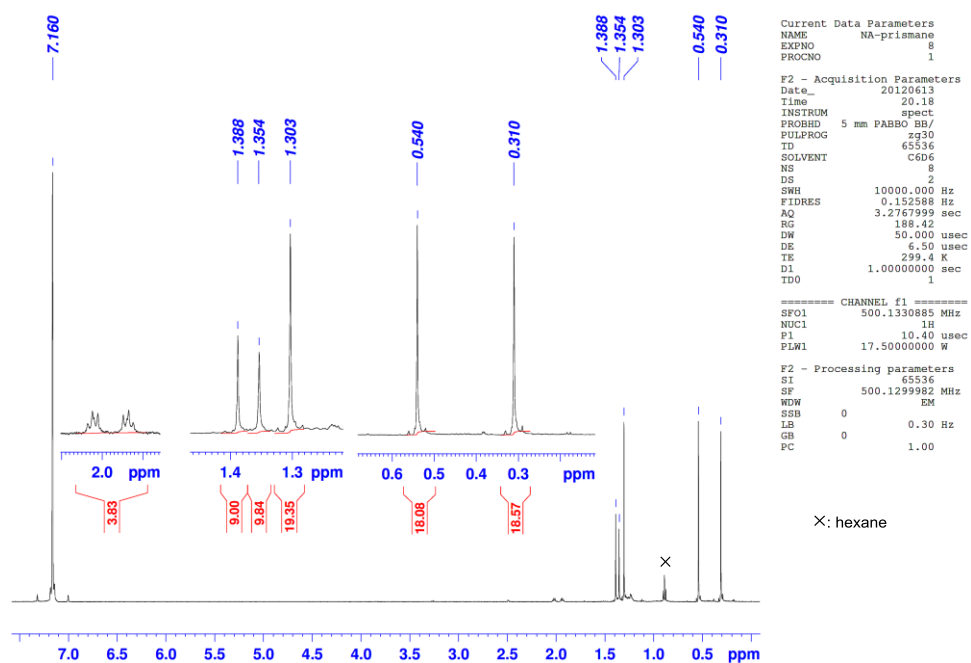Figure S9.  $^1\text{H}$  NMR spectrum of **9** in  $\text{C}_6\text{D}_6$  at rt.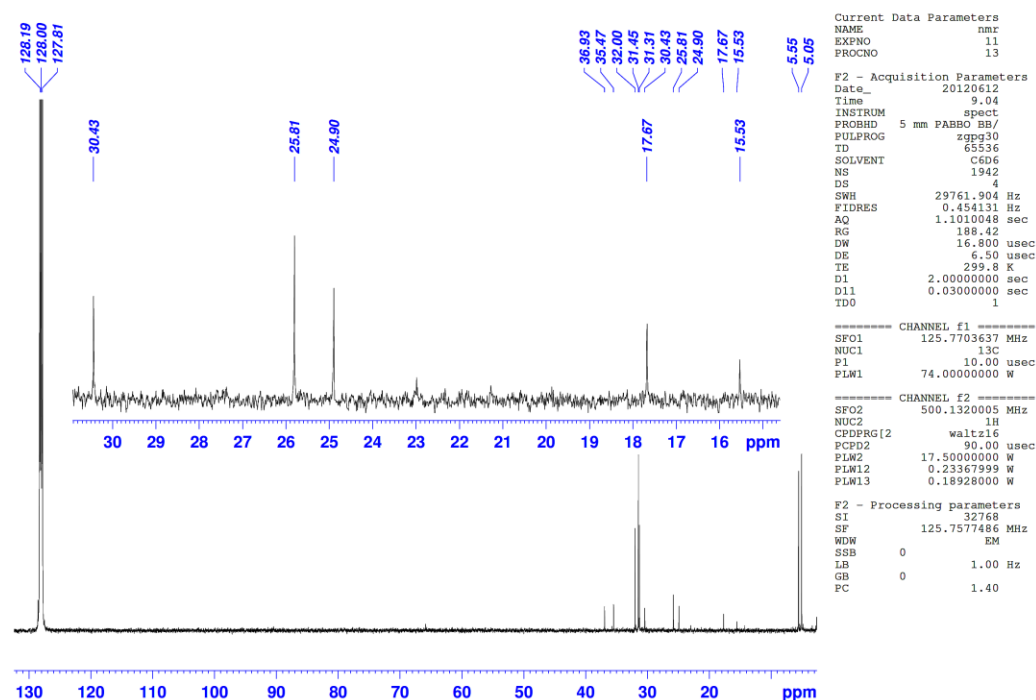Figure S10.  $^{13}\text{C}\{^1\text{H}\}$  NMR spectrum of **9** in  $\text{C}_6\text{D}_6$  at rt.



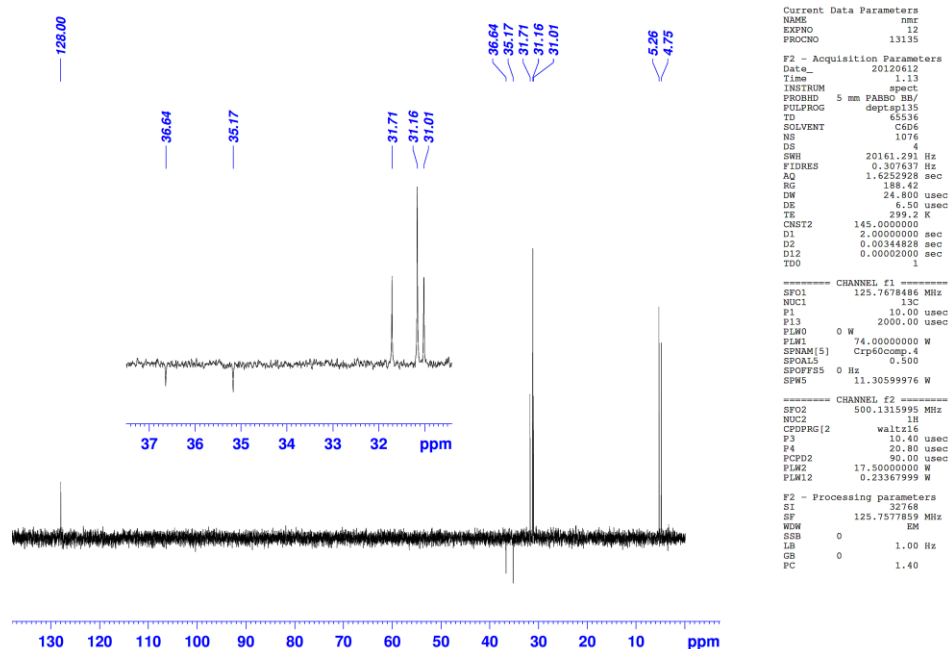

Figure S11.  $^{13}\text{C}\{^1\text{H}\}$  NMR spectrum of **9** using DEPT 135 pulse sequence in  $\text{C}_6\text{D}_6$  at rt.

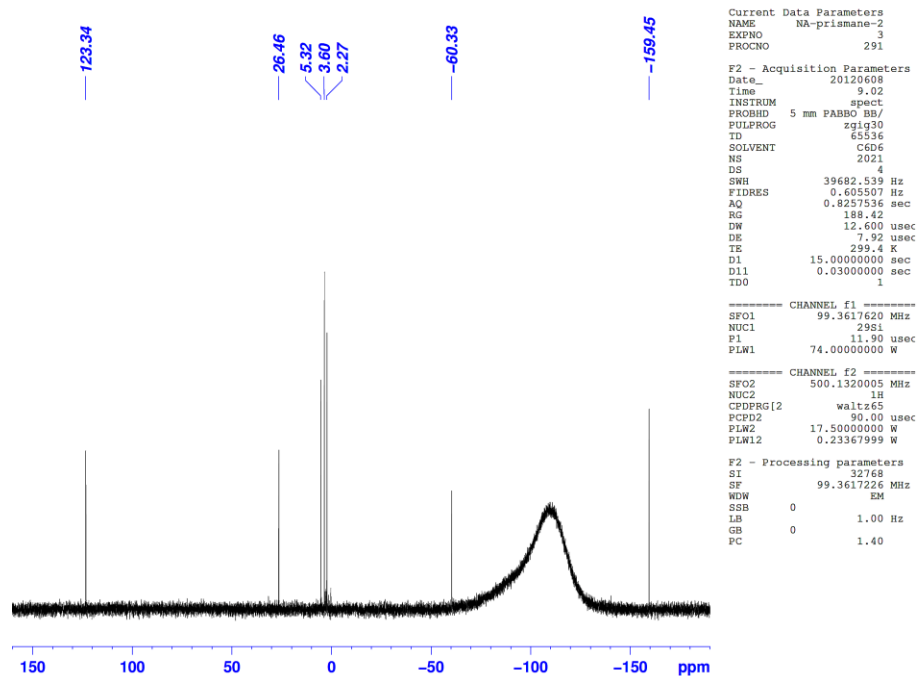

Figure S12.  $^{29}\text{Si}\{^1\text{H}\}$  NMR spectrum of **9** using the inverse-gated pulse sequence in  $\text{C}_6\text{D}_6$  at rt.

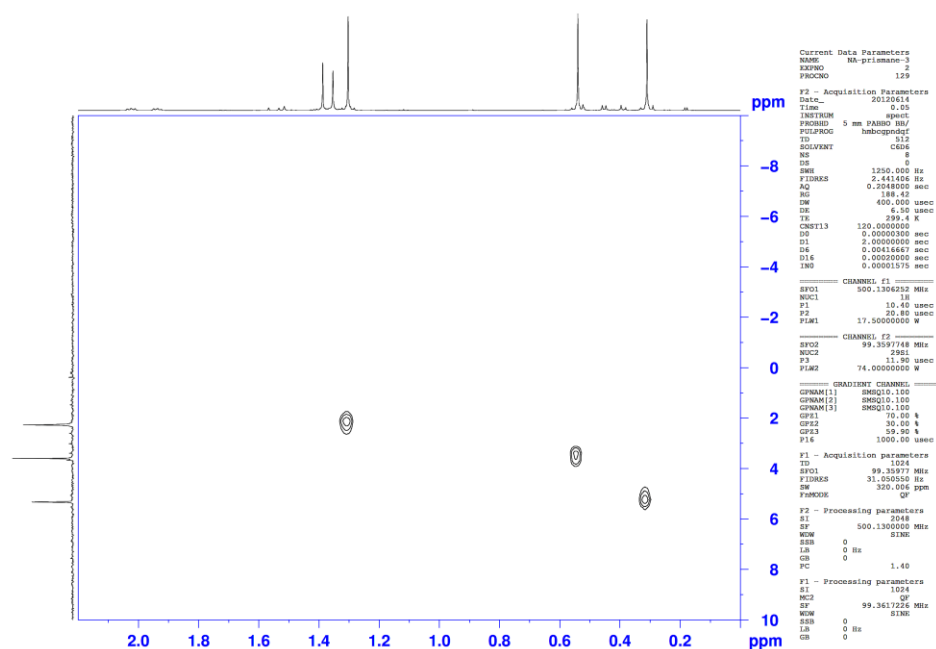Figure S13.  $^1\text{H}$ - $^{29}\text{Si}$  HMBC 2D NMR spectrum of **9** in  $\text{C}_6\text{D}_6$  at rt.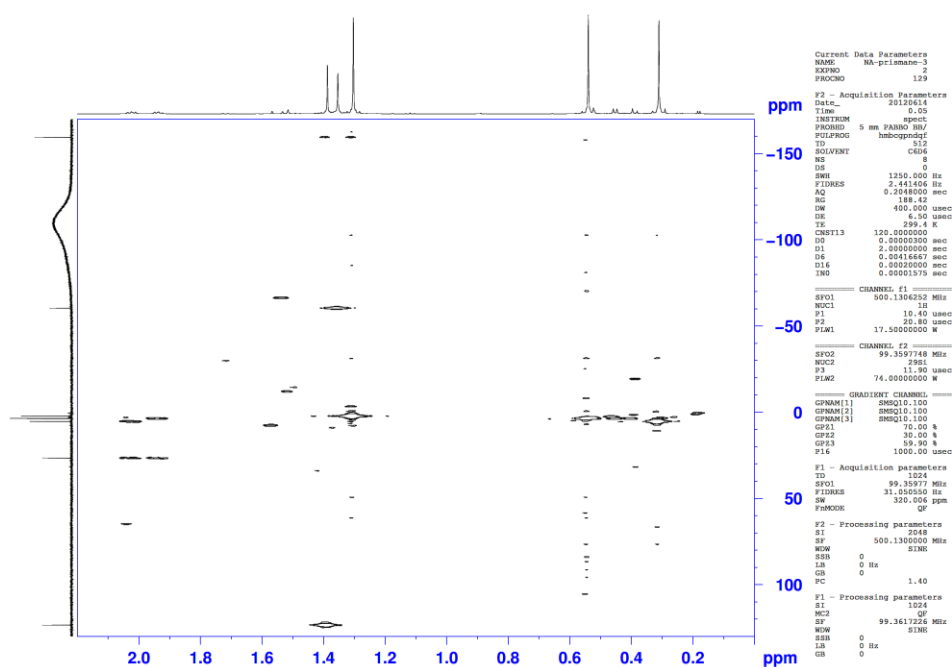Figure S14.  $^1\text{H}$ - $^{29}\text{Si}$  HMBC 2D NMR spectrum of **9** in  $\text{C}_6\text{D}_6$  at rt.

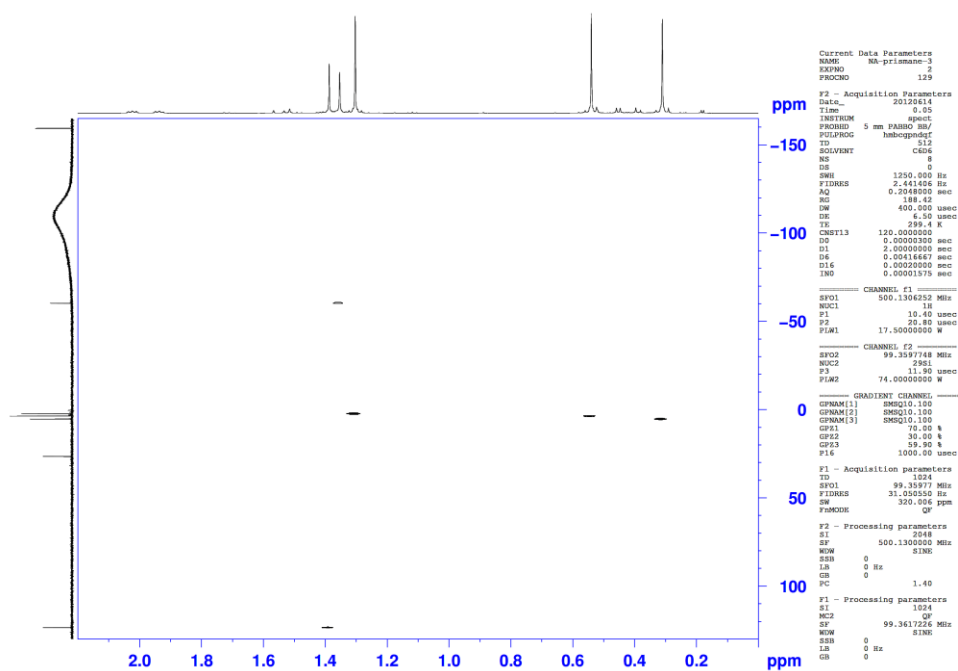

**Figure S15.**  $^1\text{H}$ - $^{29}\text{Si}$  HMBC 2D NMR spectrum of **9** in  $\text{C}_6\text{D}_6$  at rt.

## 2. Time Course of The Product Yields during Thermal Reaction of 7

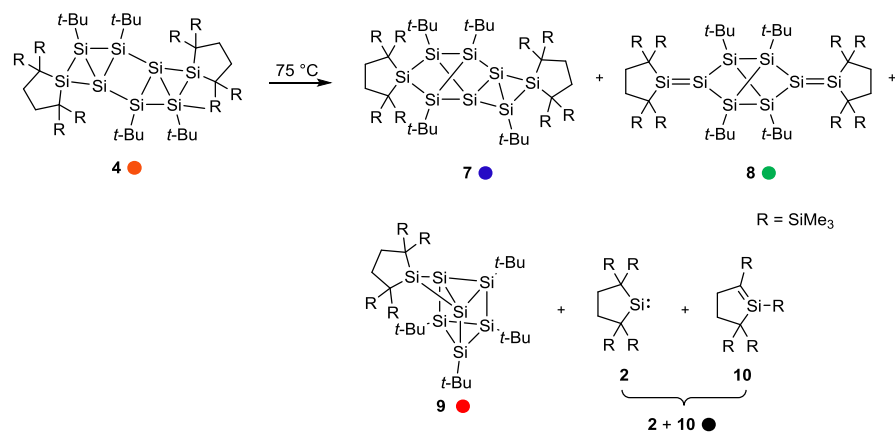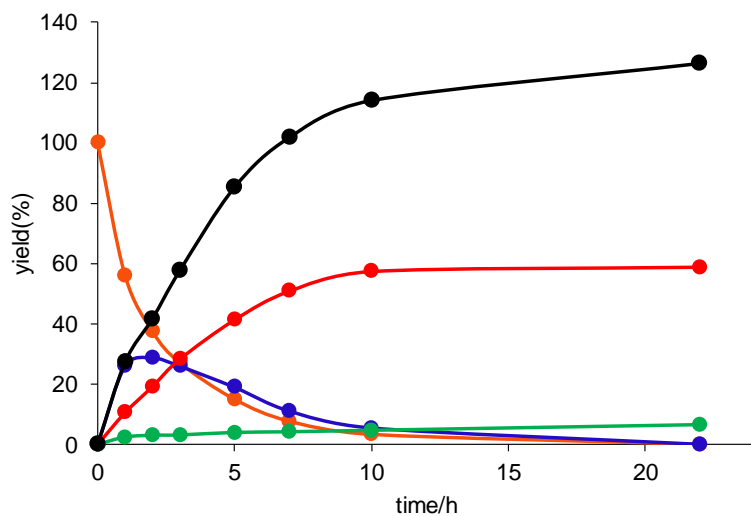

**Figure S16.** The time course of the product yields during thermolysis of **7** monitored by  $^1\text{H}$  NMR spectrum.

### 3. UV-vis Spectra

#### Compound 7

(a)

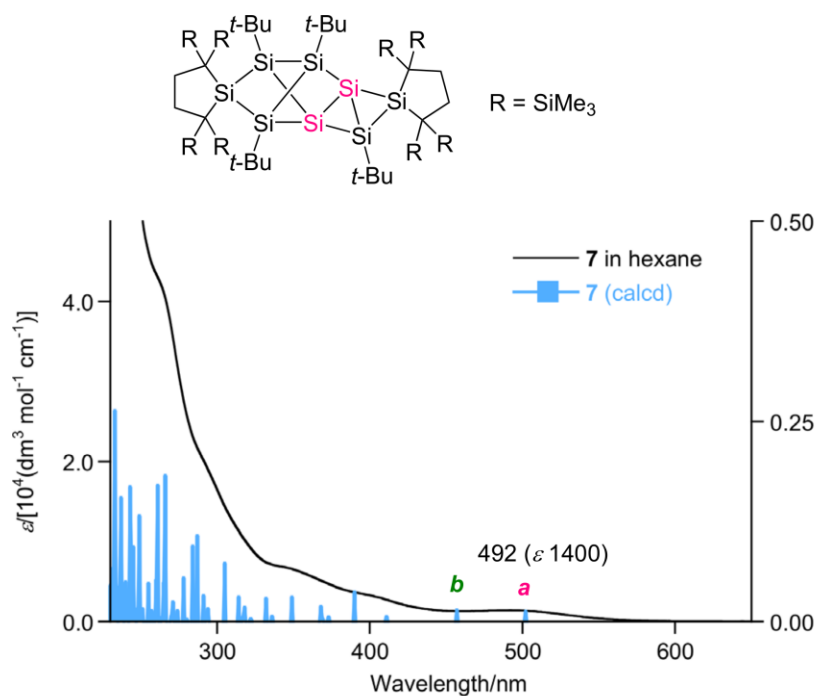

(b)

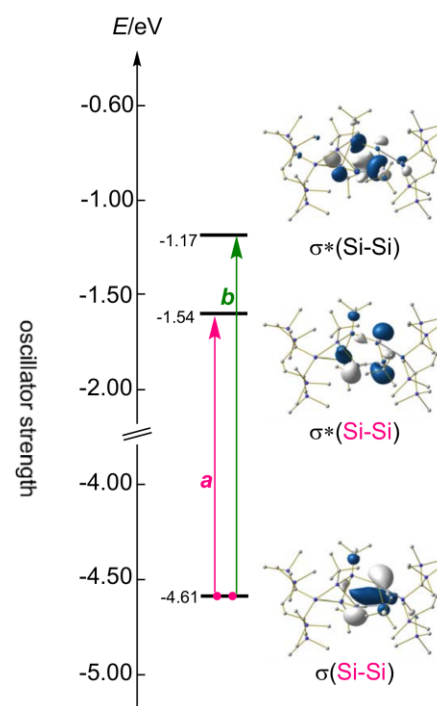

**Figure S17.** (a) UV-vis absorption spectra of **7** at room temperature in hexane (black line) as well as band positions and oscillator strengths (vertical blue bars) of **7**<sub>opt</sub> calculated at the TD-B3LYP-D3/6-311G(d)[hexane]/B3PW91-D3/6-31G(d) level of theory. (b) Selected frontier Kohn-Sham orbitals (isosurface value = 0.05) and major transitions.

## Compound 8

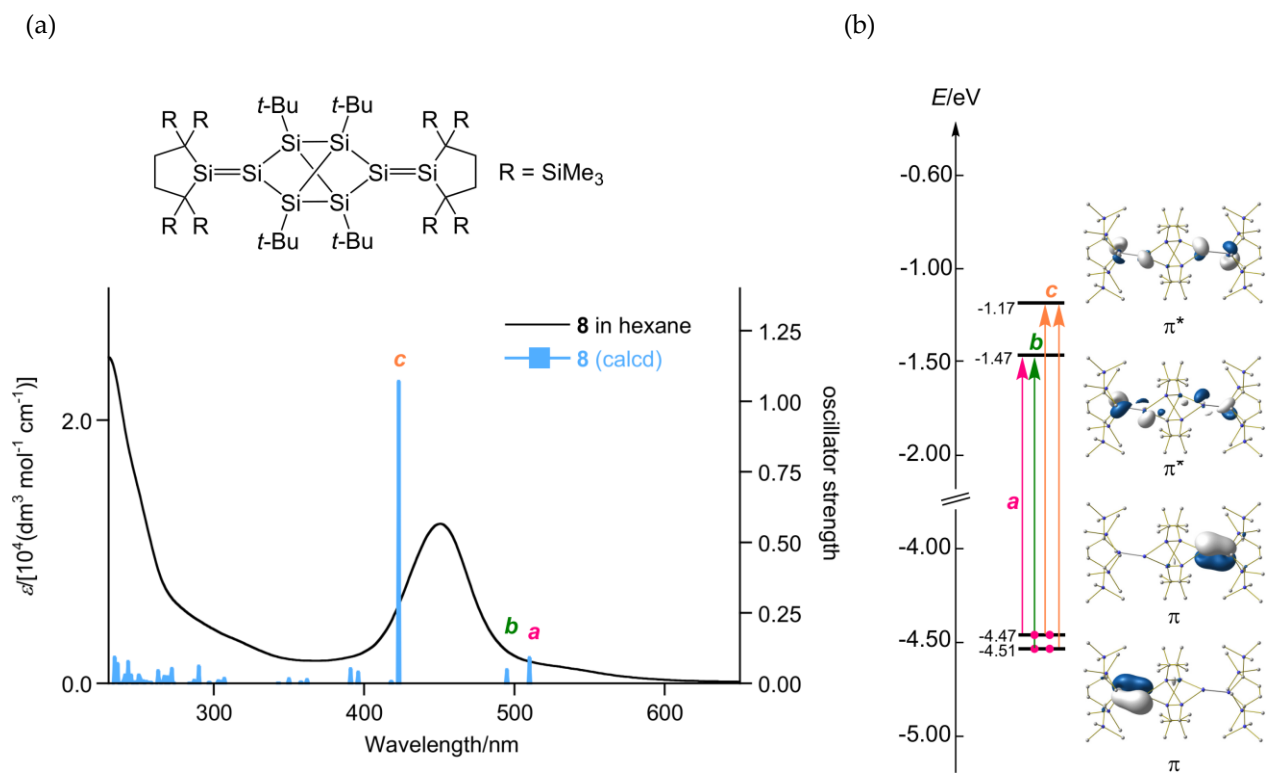

**Figure S18.** (a) UV-vis absorption spectra of **8** at room temperature in hexane (black line) and calculated band positions and oscillator strengths (vertical blue bars) of **8<sub>opt</sub>** calculated at the TD-B3LYP-D3/6-311G(d) [hexane]/B3PW91-D3/6-31G(d) level of theory. (b) Selected frontier Kohn-Sham orbitals (isosurface value = 0.05) and major transitions.

## Compound 9

(a)

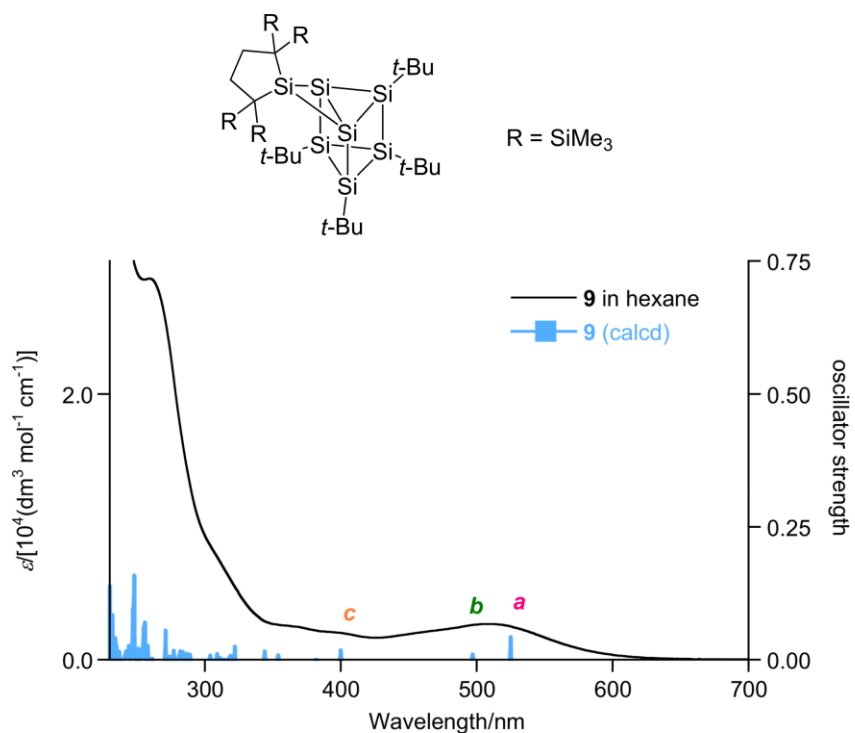

(b)

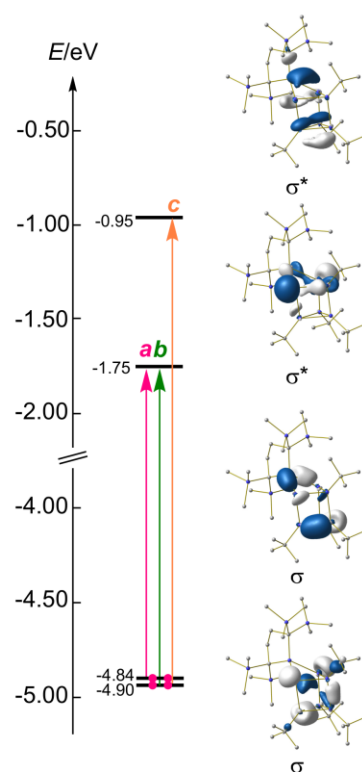

**Figure S19.** (a) UV-vis absorption spectra of 9 at room temperature in hexane (black line) and calculated band positions and oscillator strengths (vertical blue bars) of 9<sub>opt</sub> calculated at the TD-B3LYP-D3/6-311G(d) [hexane]//B3PW91-D3/6-31G(d) level of theory. (b) Selected frontier Kohn-Sham orbitals (isosurface value = 0.05) and major transitions.

**Si<sub>8</sub>R<sub>8</sub> isomers**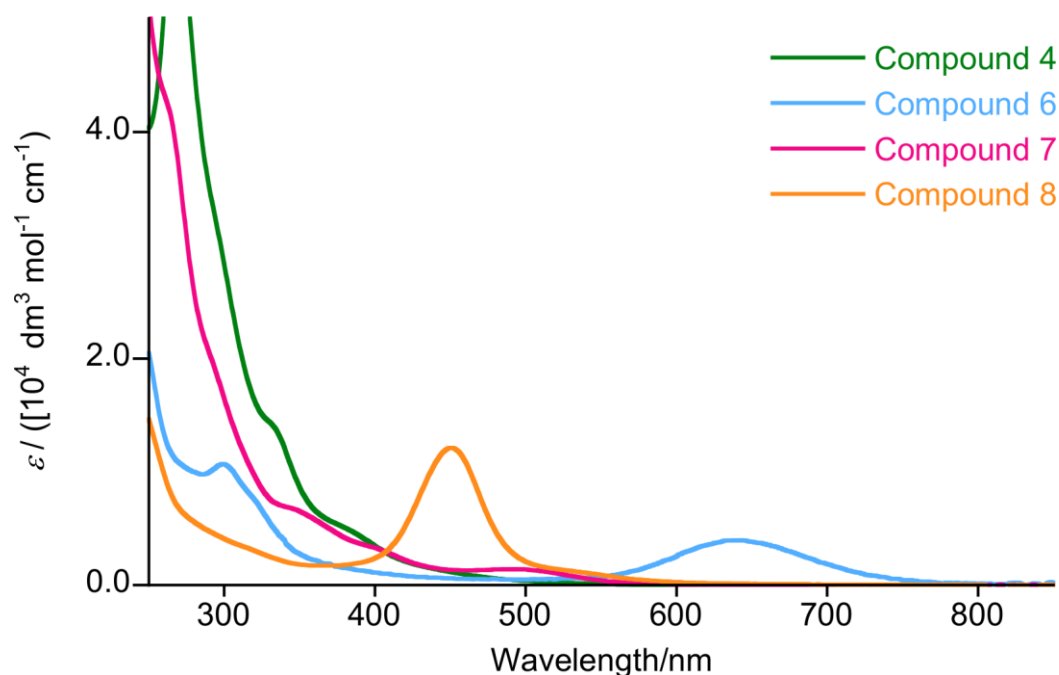

**Figure S20.** UV-vis absorption spectra of Si<sub>8</sub>R<sub>8</sub> isomers **4**, **6**, **7**, and **8** at room temperature in hexane.

**4. DFT Calculations**

All theoretical calculations were performed using the Gaussian 09<sup>S1</sup> and GRRM14<sup>S2</sup> programs. Geometry optimizations and frequency analyses of **2**, **4**, **6**, **7**, **8**, and **9** (**2**<sub>opt</sub>, **4**<sub>opt</sub>, **6**<sub>opt</sub>, **7**<sub>opt</sub>, **8**<sub>opt</sub>, and **9**<sub>opt</sub>) were carried out at the B3PW91-D3/6-31G(d) level of theory for all compounds. Imaginary frequencies were not found in any of the optimized structures. Atomic coordinates for these compounds are summarized in a .xyz file (optimized\_structures.xyz). The transition energies and oscillator strengths of the electron transitions of **4**, **6**, **7**, **8**, and **9** were calculated using a time-dependent hybrid DFT method (TD DFT) at the B3LYP/6-311G(d) level of theory (Tables S1-S5). Selected Kohn-Sham orbitals of **7**, **8**, and **9** are shown in Figures S17-S19, respectively.



## Calculated Transition Energies and Oscillator Strengths of the Electron Transitions

**Table S1.** Transition Energy, Wavelength, and Oscillator Strengths of the Electronic Transition of **4<sub>opt</sub>**

|                                                                                     |     |                                                                      |           |           |          |              |
|-------------------------------------------------------------------------------------|-----|----------------------------------------------------------------------|-----------|-----------|----------|--------------|
| Excited State<br>314 -> 315                                                         | 1:  | Singlet-A<br>0.70076                                                 | 2.6945 eV | 460.14 nm | f=0.0001 | <S**2>=0.000 |
| Excited State<br>313 -> 315                                                         | 2:  | Singlet-A<br>0.69537                                                 | 2.9123 eV | 425.73 nm | f=0.0050 | <S**2>=0.000 |
| Excited State<br>312 -> 315<br>314 -> 316<br>314 -> 318                             | 3:  | Singlet-A<br>-0.47889<br>0.49944<br>0.10191                          | 3.0658 eV | 404.41 nm | f=0.0028 | <S**2>=0.000 |
| Excited State<br>312 -> 315<br>314 -> 316                                           | 4:  | Singlet-A<br>0.49918<br>0.49162                                      | 3.1398 eV | 394.88 nm | f=0.0007 | <S**2>=0.000 |
| Excited State<br>312 -> 315<br>314 -> 317<br>314 -> 318                             | 5:  | Singlet-A<br>0.11921<br>0.30617<br>0.60991                           | 3.1669 eV | 391.50 nm | f=0.0002 | <S**2>=0.000 |
| Excited State<br>313 -> 317<br>314 -> 317<br>314 -> 318                             | 6:  | Singlet-A<br>-0.16022<br>0.59881<br>-0.30441                         | 3.2524 eV | 381.21 nm | f=0.0003 | <S**2>=0.000 |
| Excited State<br>312 -> 317<br>313 -> 316<br>313 -> 317                             | 7:  | Singlet-A<br>0.11773<br>0.66382<br>-0.15202                          | 3.3451 eV | 370.64 nm | f=0.0175 | <S**2>=0.000 |
| Excited State<br>313 -> 316<br>313 -> 317<br>313 -> 318<br>314 -> 317               | 8:  | Singlet-A<br>0.12947<br>0.62323<br>-0.22202<br>0.15461               | 3.3579 eV | 369.23 nm | f=0.0019 | <S**2>=0.000 |
| Excited State<br>312 -> 317<br>313 -> 317<br>313 -> 318                             | 9:  | Singlet-A<br>0.25062<br>0.19832<br>0.60887                           | 3.4987 eV | 354.37 nm | f=0.0089 | <S**2>=0.000 |
| Excited State<br>312 -> 316<br>312 -> 317<br>312 -> 318                             | 10: | Singlet-A<br>0.63327<br>0.10933<br>0.26268                           | 3.5504 eV | 349.21 nm | f=0.0030 | <S**2>=0.000 |
| Excited State<br>311 -> 315<br>312 -> 316<br>312 -> 317<br>313 -> 316<br>313 -> 318 | 11: | Singlet-A<br>-0.30713<br>-0.12010<br>0.57420<br>-0.10077<br>-0.17504 | 3.6245 eV | 342.07 nm | f=0.0651 | <S**2>=0.000 |
| Excited State<br>311 -> 315<br>312 -> 316<br>312 -> 318                             | 12: | Singlet-A<br>0.13168<br>-0.25991<br>0.61902                          | 3.6422 eV | 340.41 nm | f=0.0183 | <S**2>=0.000 |
| Excited State<br>310 -> 316<br>310 -> 318                                           | 13: | Singlet-A<br>-0.10080<br>0.10531                                     | 3.8036 eV | 325.96 nm | f=0.1101 | <S**2>=0.000 |

|                   |           |           |           |          |              |  |  |  |  |
|-------------------|-----------|-----------|-----------|----------|--------------|--|--|--|--|
| 311 -> 315        | 0.57190   |           |           |          |              |  |  |  |  |
| 311 -> 317        | -0.14155  |           |           |          |              |  |  |  |  |
| 312 -> 317        | 0.22610   |           |           |          |              |  |  |  |  |
| 313 -> 316        | -0.12301  |           |           |          |              |  |  |  |  |
| 313 -> 318        | -0.10156  |           |           |          |              |  |  |  |  |
| 314 -> 319        | -0.14720  |           |           |          |              |  |  |  |  |
| Excited State 14: | Singlet-A | 3.9675 eV | 312.50 nm | f=0.0021 | <S**2>=0.000 |  |  |  |  |
| 310 -> 315        | 0.65301   |           |           |          |              |  |  |  |  |
| 311 -> 316        | 0.11570   |           |           |          |              |  |  |  |  |
| 314 -> 320        | 0.20575   |           |           |          |              |  |  |  |  |
| Excited State 15: | Singlet-A | 4.0091 eV | 309.26 nm | f=0.1379 | <S**2>=0.000 |  |  |  |  |
| 311 -> 317        | -0.15976  |           |           |          |              |  |  |  |  |
| 313 -> 319        | 0.16290   |           |           |          |              |  |  |  |  |
| 314 -> 319        | 0.63852   |           |           |          |              |  |  |  |  |
| Excited State 16: | Singlet-A | 4.0689 eV | 304.71 nm | f=0.0008 | <S**2>=0.000 |  |  |  |  |
| 310 -> 315        | -0.17156  |           |           |          |              |  |  |  |  |
| 311 -> 316        | 0.57102   |           |           |          |              |  |  |  |  |
| 311 -> 318        | -0.14119  |           |           |          |              |  |  |  |  |
| 312 -> 319        | 0.10201   |           |           |          |              |  |  |  |  |
| 313 -> 319        | -0.10183  |           |           |          |              |  |  |  |  |
| 314 -> 320        | 0.25862   |           |           |          |              |  |  |  |  |
| Excited State 17: | Singlet-A | 4.0797 eV | 303.91 nm | f=0.0024 | <S**2>=0.000 |  |  |  |  |
| 311 -> 317        | 0.19162   |           |           |          |              |  |  |  |  |
| 312 -> 320        | -0.12428  |           |           |          |              |  |  |  |  |
| 313 -> 319        | 0.62872   |           |           |          |              |  |  |  |  |
| 314 -> 319        | -0.12197  |           |           |          |              |  |  |  |  |
| Excited State 18: | Singlet-A | 4.1184 eV | 301.05 nm | f=0.0102 | <S**2>=0.000 |  |  |  |  |
| 310 -> 315        | -0.14542  |           |           |          |              |  |  |  |  |
| 311 -> 316        | -0.23191  |           |           |          |              |  |  |  |  |
| 312 -> 319        | -0.14941  |           |           |          |              |  |  |  |  |
| 313 -> 320        | 0.20086   |           |           |          |              |  |  |  |  |
| 314 -> 320        | 0.57118   |           |           |          |              |  |  |  |  |
| Excited State 19: | Singlet-A | 4.1959 eV | 295.49 nm | f=0.0012 | <S**2>=0.000 |  |  |  |  |
| 311 -> 316        | 0.16126   |           |           |          |              |  |  |  |  |
| 311 -> 317        | -0.11073  |           |           |          |              |  |  |  |  |
| 311 -> 318        | -0.19916  |           |           |          |              |  |  |  |  |
| 312 -> 319        | -0.39007  |           |           |          |              |  |  |  |  |
| 313 -> 320        | 0.47109   |           |           |          |              |  |  |  |  |
| 314 -> 320        | -0.16905  |           |           |          |              |  |  |  |  |
| Excited State 20: | Singlet-A | 4.2445 eV | 292.11 nm | f=0.1994 | <S**2>=0.000 |  |  |  |  |
| 310 -> 316        | -0.10759  |           |           |          |              |  |  |  |  |
| 310 -> 318        | 0.12700   |           |           |          |              |  |  |  |  |
| 311 -> 317        | 0.58879   |           |           |          |              |  |  |  |  |
| 312 -> 320        | 0.16073   |           |           |          |              |  |  |  |  |
| 313 -> 319        | -0.13279  |           |           |          |              |  |  |  |  |
| 314 -> 319        | 0.15617   |           |           |          |              |  |  |  |  |
| Excited State 21: | Singlet-A | 4.2648 eV | 290.72 nm | f=0.0293 | <S**2>=0.000 |  |  |  |  |
| 310 -> 317        | -0.14021  |           |           |          |              |  |  |  |  |
| 311 -> 316        | 0.21071   |           |           |          |              |  |  |  |  |
| 311 -> 318        | 0.59735   |           |           |          |              |  |  |  |  |
| 313 -> 320        | 0.21422   |           |           |          |              |  |  |  |  |
| Excited State 22: | Singlet-A | 4.3050 eV | 288.00 nm | f=0.0679 | <S**2>=0.000 |  |  |  |  |
| 309 -> 315        | 0.54548   |           |           |          |              |  |  |  |  |
| 310 -> 316        | -0.33328  |           |           |          |              |  |  |  |  |
| 310 -> 318        | -0.19460  |           |           |          |              |  |  |  |  |
| 313 -> 321        | -0.11150  |           |           |          |              |  |  |  |  |
| Excited State 23: | Singlet-A | 4.3878 eV | 282.56 nm | f=0.0372 | <S**2>=0.000 |  |  |  |  |
| 309 -> 315        | 0.28995   |           |           |          |              |  |  |  |  |
| 310 -> 316        | 0.32995   |           |           |          |              |  |  |  |  |
| 310 -> 317        | 0.14051   |           |           |          |              |  |  |  |  |

|                   |           |           |           |          |              |  |  |
|-------------------|-----------|-----------|-----------|----------|--------------|--|--|
| 310 -> 318        | 0.22035   |           |           |          |              |  |  |
| 311 -> 317        | -0.11504  |           |           |          |              |  |  |
| 312 -> 319        | 0.10095   |           |           |          |              |  |  |
| 312 -> 320        | 0.41670   |           |           |          |              |  |  |
| 313 -> 319        | 0.13517   |           |           |          |              |  |  |
| Excited State 24: | Singlet-A | 4.4164 eV | 280.74 nm | f=0.0098 | <S**2>=0.000 |  |  |
| 310 -> 317        | 0.23662   |           |           |          |              |  |  |
| 310 -> 318        | -0.13896  |           |           |          |              |  |  |
| 312 -> 319        | 0.50986   |           |           |          |              |  |  |
| 313 -> 320        | 0.34430   |           |           |          |              |  |  |
| Excited State 25: | Singlet-A | 4.4789 eV | 276.82 nm | f=0.0464 | <S**2>=0.000 |  |  |
| 310 -> 317        | 0.56469   |           |           |          |              |  |  |
| 310 -> 318        | 0.10574   |           |           |          |              |  |  |
| 311 -> 318        | 0.15989   |           |           |          |              |  |  |
| 312 -> 319        | -0.13551  |           |           |          |              |  |  |
| 312 -> 320        | -0.17255  |           |           |          |              |  |  |
| 313 -> 320        | -0.15556  |           |           |          |              |  |  |
| Excited State 26: | Singlet-A | 4.4915 eV | 276.04 nm | f=0.0624 | <S**2>=0.000 |  |  |
| 310 -> 317        | -0.12813  |           |           |          |              |  |  |
| 310 -> 318        | 0.55452   |           |           |          |              |  |  |
| 312 -> 320        | -0.26936  |           |           |          |              |  |  |
| 314 -> 321        | 0.15268   |           |           |          |              |  |  |
| Excited State 27: | Singlet-A | 4.5327 eV | 273.53 nm | f=0.0740 | <S**2>=0.000 |  |  |
| 309 -> 315        | -0.21234  |           |           |          |              |  |  |
| 310 -> 316        | -0.26703  |           |           |          |              |  |  |
| 312 -> 320        | 0.33206   |           |           |          |              |  |  |
| 313 -> 319        | 0.10501   |           |           |          |              |  |  |
| 314 -> 321        | 0.45966   |           |           |          |              |  |  |
| 314 -> 323        | -0.13682  |           |           |          |              |  |  |
| Excited State 28: | Singlet-A | 4.5875 eV | 270.27 nm | f=0.0035 | <S**2>=0.000 |  |  |
| 309 -> 316        | 0.34012   |           |           |          |              |  |  |
| 314 -> 321        | 0.13887   |           |           |          |              |  |  |
| 314 -> 322        | 0.56805   |           |           |          |              |  |  |
| 314 -> 324        | 0.10357   |           |           |          |              |  |  |
| Excited State 29: | Singlet-A | 4.6455 eV | 266.89 nm | f=0.4909 | <S**2>=0.000 |  |  |
| 309 -> 317        | 0.23145   |           |           |          |              |  |  |
| 310 -> 316        | 0.35006   |           |           |          |              |  |  |
| 310 -> 318        | -0.15502  |           |           |          |              |  |  |
| 312 -> 320        | -0.18786  |           |           |          |              |  |  |
| 313 -> 321        | -0.13596  |           |           |          |              |  |  |
| 314 -> 321        | 0.38142   |           |           |          |              |  |  |
| 314 -> 322        | -0.10531  |           |           |          |              |  |  |
| Excited State 30: | Singlet-A | 4.6844 eV | 264.67 nm | f=0.0038 | <S**2>=0.000 |  |  |
| 309 -> 316        | 0.47846   |           |           |          |              |  |  |
| 309 -> 317        | 0.13895   |           |           |          |              |  |  |
| 309 -> 318        | 0.29919   |           |           |          |              |  |  |
| 313 -> 322        | -0.18003  |           |           |          |              |  |  |
| 314 -> 322        | -0.27933  |           |           |          |              |  |  |
| Excited State 31: | Singlet-A | 4.7427 eV | 261.42 nm | f=0.0186 | <S**2>=0.000 |  |  |
| 309 -> 317        | 0.20633   |           |           |          |              |  |  |
| 309 -> 318        | 0.32804   |           |           |          |              |  |  |
| 311 -> 319        | -0.13675  |           |           |          |              |  |  |
| 313 -> 321        | 0.35403   |           |           |          |              |  |  |
| 313 -> 322        | 0.36383   |           |           |          |              |  |  |
| 314 -> 322        | 0.10739   |           |           |          |              |  |  |
| 314 -> 324        | -0.14909  |           |           |          |              |  |  |
| Excited State 32: | Singlet-A | 4.7501 eV | 261.01 nm | f=0.0661 | <S**2>=0.000 |  |  |
| 309 -> 318        | -0.20990  |           |           |          |              |  |  |
| 312 -> 322        | 0.11412   |           |           |          |              |  |  |
| 313 -> 321        | 0.50105   |           |           |          |              |  |  |
| 313 -> 322        | -0.29820  |           |           |          |              |  |  |

|                   |           |           |           |          |              |  |  |  |  |
|-------------------|-----------|-----------|-----------|----------|--------------|--|--|--|--|
| 314 -> 321        | 0.12096   |           |           |          |              |  |  |  |  |
| 314 -> 323        | 0.13425   |           |           |          |              |  |  |  |  |
| Excited State 33: | Singlet-A | 4.7805 eV | 259.35 nm | f=0.0018 | <S**2>=0.000 |  |  |  |  |
| 309 -> 317        | -0.15148  |           |           |          |              |  |  |  |  |
| 313 -> 321        | -0.12561  |           |           |          |              |  |  |  |  |
| 314 -> 321        | 0.12711   |           |           |          |              |  |  |  |  |
| 314 -> 323        | 0.58465   |           |           |          |              |  |  |  |  |
| 314 -> 325        | 0.25608   |           |           |          |              |  |  |  |  |
| Excited State 34: | Singlet-A | 4.7936 eV | 258.64 nm | f=0.0036 | <S**2>=0.000 |  |  |  |  |
| 309 -> 316        | 0.20182   |           |           |          |              |  |  |  |  |
| 313 -> 322        | 0.35267   |           |           |          |              |  |  |  |  |
| 314 -> 322        | -0.16048  |           |           |          |              |  |  |  |  |
| 314 -> 324        | 0.48647   |           |           |          |              |  |  |  |  |
| 314 -> 326        | 0.17860   |           |           |          |              |  |  |  |  |
| Excited State 35: | Singlet-A | 4.8414 eV | 256.09 nm | f=0.0532 | <S**2>=0.000 |  |  |  |  |
| 309 -> 316        | -0.13979  |           |           |          |              |  |  |  |  |
| 309 -> 317        | 0.49980   |           |           |          |              |  |  |  |  |
| 312 -> 321        | -0.16799  |           |           |          |              |  |  |  |  |
| 312 -> 322        | -0.23524  |           |           |          |              |  |  |  |  |
| 314 -> 324        | 0.18546   |           |           |          |              |  |  |  |  |
| Excited State 36: | Singlet-A | 4.8519 eV | 255.54 nm | f=0.0242 | <S**2>=0.000 |  |  |  |  |
| 309 -> 316        | -0.22599  |           |           |          |              |  |  |  |  |
| 309 -> 317        | -0.14372  |           |           |          |              |  |  |  |  |
| 309 -> 318        | 0.41757   |           |           |          |              |  |  |  |  |
| 311 -> 319        | 0.12677   |           |           |          |              |  |  |  |  |
| 312 -> 321        | -0.12173  |           |           |          |              |  |  |  |  |
| 312 -> 322        | 0.20668   |           |           |          |              |  |  |  |  |
| 313 -> 322        | -0.18904  |           |           |          |              |  |  |  |  |
| 314 -> 324        | 0.25584   |           |           |          |              |  |  |  |  |
| Excited State 37: | Singlet-A | 4.9026 eV | 252.90 nm | f=0.0224 | <S**2>=0.000 |  |  |  |  |
| 309 -> 316        | -0.12408  |           |           |          |              |  |  |  |  |
| 309 -> 318        | 0.12264   |           |           |          |              |  |  |  |  |
| 311 -> 319        | -0.14039  |           |           |          |              |  |  |  |  |
| 312 -> 321        | 0.52358   |           |           |          |              |  |  |  |  |
| 312 -> 322        | -0.12907  |           |           |          |              |  |  |  |  |
| 313 -> 322        | -0.12150  |           |           |          |              |  |  |  |  |
| 313 -> 324        | 0.22899   |           |           |          |              |  |  |  |  |
| 314 -> 324        | 0.17889   |           |           |          |              |  |  |  |  |
| Excited State 38: | Singlet-A | 4.9609 eV | 249.92 nm | f=0.2126 | <S**2>=0.000 |  |  |  |  |
| 311 -> 320        | 0.15107   |           |           |          |              |  |  |  |  |
| 312 -> 322        | 0.13557   |           |           |          |              |  |  |  |  |
| 313 -> 323        | 0.57665   |           |           |          |              |  |  |  |  |
| 313 -> 325        | 0.21157   |           |           |          |              |  |  |  |  |
| 313 -> 329        | 0.11134   |           |           |          |              |  |  |  |  |
| Excited State 39: | Singlet-A | 4.9719 eV | 249.37 nm | f=0.0330 | <S**2>=0.000 |  |  |  |  |
| 311 -> 319        | 0.62122   |           |           |          |              |  |  |  |  |
| 312 -> 321        | 0.12426   |           |           |          |              |  |  |  |  |
| 313 -> 322        | 0.13660   |           |           |          |              |  |  |  |  |
| 313 -> 324        | 0.13467   |           |           |          |              |  |  |  |  |
| Excited State 40: | Singlet-A | 5.0452 eV | 245.75 nm | f=0.1792 | <S**2>=0.000 |  |  |  |  |
| 305 -> 315        | -0.11351  |           |           |          |              |  |  |  |  |
| 307 -> 315        | -0.12346  |           |           |          |              |  |  |  |  |
| 309 -> 317        | 0.14006   |           |           |          |              |  |  |  |  |
| 311 -> 320        | 0.30882   |           |           |          |              |  |  |  |  |
| 312 -> 321        | 0.13702   |           |           |          |              |  |  |  |  |
| 312 -> 322        | 0.45352   |           |           |          |              |  |  |  |  |
| 313 -> 321        | -0.13638  |           |           |          |              |  |  |  |  |
| 313 -> 323        | -0.17273  |           |           |          |              |  |  |  |  |
| Excited State 41: | Singlet-A | 5.0546 eV | 245.29 nm | f=0.0013 | <S**2>=0.000 |  |  |  |  |
| 306 -> 315        | 0.16589   |           |           |          |              |  |  |  |  |
| 308 -> 315        | 0.32509   |           |           |          |              |  |  |  |  |

|                   |           |           |           |          |              |  |  |
|-------------------|-----------|-----------|-----------|----------|--------------|--|--|
| 311 -> 319        | -0.11319  |           |           |          |              |  |  |
| 312 -> 321        | -0.25959  |           |           |          |              |  |  |
| 312 -> 322        | 0.10779   |           |           |          |              |  |  |
| 313 -> 324        | 0.47420   |           |           |          |              |  |  |
| 313 -> 326        | 0.13686   |           |           |          |              |  |  |
| Excited State 42: | Singlet-A | 5.0714 eV | 244.48 nm | f=0.0116 | <S**2>=0.000 |  |  |
| 304 -> 315        | -0.11533  |           |           |          |              |  |  |
| 306 -> 315        | 0.22780   |           |           |          |              |  |  |
| 308 -> 315        | 0.49253   |           |           |          |              |  |  |
| 312 -> 321        | 0.12564   |           |           |          |              |  |  |
| 312 -> 323        | -0.12325  |           |           |          |              |  |  |
| 313 -> 324        | -0.33572  |           |           |          |              |  |  |
| 313 -> 326        | -0.10520  |           |           |          |              |  |  |
| Excited State 43: | Singlet-A | 5.1410 eV | 241.17 nm | f=0.0395 | <S**2>=0.000 |  |  |
| 305 -> 315        | 0.10318   |           |           |          |              |  |  |
| 307 -> 315        | 0.19093   |           |           |          |              |  |  |
| 310 -> 319        | 0.23748   |           |           |          |              |  |  |
| 311 -> 320        | 0.49267   |           |           |          |              |  |  |
| 312 -> 322        | -0.16594  |           |           |          |              |  |  |
| 312 -> 324        | 0.18269   |           |           |          |              |  |  |
| 314 -> 325        | -0.15527  |           |           |          |              |  |  |
| Excited State 44: | Singlet-A | 5.1530 eV | 240.61 nm | f=0.0000 | <S**2>=0.000 |  |  |
| 308 -> 315        | 0.11841   |           |           |          |              |  |  |
| 312 -> 321        | 0.10908   |           |           |          |              |  |  |
| 312 -> 323        | 0.60503   |           |           |          |              |  |  |
| 312 -> 325        | 0.22893   |           |           |          |              |  |  |
| Excited State 45: | Singlet-A | 5.1546 eV | 240.53 nm | f=0.0118 | <S**2>=0.000 |  |  |
| 307 -> 315        | 0.22614   |           |           |          |              |  |  |
| 314 -> 323        | -0.26464  |           |           |          |              |  |  |
| 314 -> 325        | 0.54543   |           |           |          |              |  |  |
| 314 -> 326        | 0.11034   |           |           |          |              |  |  |
| 314 -> 331        | -0.14962  |           |           |          |              |  |  |
| Excited State 46: | Singlet-A | 5.1818 eV | 239.27 nm | f=0.1447 | <S**2>=0.000 |  |  |
| 307 -> 315        | 0.46639   |           |           |          |              |  |  |
| 310 -> 319        | -0.39145  |           |           |          |              |  |  |
| 312 -> 322        | 0.12434   |           |           |          |              |  |  |
| 312 -> 324        | 0.11740   |           |           |          |              |  |  |
| 313 -> 323        | -0.11668  |           |           |          |              |  |  |
| 314 -> 325        | -0.15620  |           |           |          |              |  |  |
| Excited State 47: | Singlet-A | 5.2052 eV | 238.19 nm | f=0.0254 | <S**2>=0.000 |  |  |
| 307 -> 315        | -0.29067  |           |           |          |              |  |  |
| 310 -> 319        | -0.17260  |           |           |          |              |  |  |
| 312 -> 324        | 0.50697   |           |           |          |              |  |  |
| 312 -> 326        | 0.14981   |           |           |          |              |  |  |
| 313 -> 325        | 0.14812   |           |           |          |              |  |  |
| 314 -> 325        | 0.10475   |           |           |          |              |  |  |
| 314 -> 327        | 0.10474   |           |           |          |              |  |  |
| Excited State 48: | Singlet-A | 5.2237 eV | 237.35 nm | f=0.0020 | <S**2>=0.000 |  |  |
| 306 -> 315        | 0.60780   |           |           |          |              |  |  |
| 308 -> 315        | -0.31397  |           |           |          |              |  |  |
| Excited State 49: | Singlet-A | 5.2484 eV | 236.23 nm | f=0.2035 | <S**2>=0.000 |  |  |
| 305 -> 315        | -0.19315  |           |           |          |              |  |  |
| 307 -> 315        | 0.22529   |           |           |          |              |  |  |
| 308 -> 316        | 0.10714   |           |           |          |              |  |  |
| 310 -> 319        | 0.35482   |           |           |          |              |  |  |
| 311 -> 320        | -0.20461  |           |           |          |              |  |  |
| 312 -> 324        | 0.16990   |           |           |          |              |  |  |
| 313 -> 325        | 0.10217   |           |           |          |              |  |  |
| 314 -> 324        | 0.10146   |           |           |          |              |  |  |
| 314 -> 326        | -0.24203  |           |           |          |              |  |  |
| 314 -> 327        | 0.20490   |           |           |          |              |  |  |
| 314 -> 334        | 0.10447   |           |           |          |              |  |  |

|               |            |           |           |           |          |              |
|---------------|------------|-----------|-----------|-----------|----------|--------------|
| Excited State | 50:        | Singlet-A | 5.2487 eV | 236.22 nm | f=0.0383 | <S**2>=0.000 |
|               | 310 -> 319 | 0.14993   |           |           |          |              |
|               | 314 -> 324 | -0.23558  |           |           |          |              |
|               | 314 -> 325 | -0.10312  |           |           |          |              |
|               | 314 -> 326 | 0.58801   |           |           |          |              |
| Excited State | 51:        | Singlet-A | 5.2714 eV | 235.20 nm | f=0.0064 | <S**2>=0.000 |
|               | 310 -> 319 | -0.12731  |           |           |          |              |
|               | 311 -> 320 | 0.11985   |           |           |          |              |
|               | 312 -> 324 | -0.10749  |           |           |          |              |
|               | 313 -> 325 | -0.24624  |           |           |          |              |
|               | 314 -> 327 | 0.49777   |           |           |          |              |
|               | 314 -> 330 | -0.18535  |           |           |          |              |
|               | 314 -> 331 | 0.14769   |           |           |          |              |
|               | 314 -> 334 | 0.18229   |           |           |          |              |
| Excited State | 52:        | Singlet-A | 5.2985 eV | 234.00 nm | f=0.0159 | <S**2>=0.000 |
|               | 305 -> 315 | 0.23404   |           |           |          |              |
|               | 310 -> 320 | 0.57268   |           |           |          |              |
|               | 313 -> 325 | 0.17737   |           |           |          |              |
| Excited State | 53:        | Singlet-A | 5.2991 eV | 233.97 nm | f=0.0422 | <S**2>=0.000 |
|               | 305 -> 315 | 0.37761   |           |           |          |              |
|               | 310 -> 320 | -0.32556  |           |           |          |              |
|               | 312 -> 324 | -0.11109  |           |           |          |              |
|               | 313 -> 323 | -0.12851  |           |           |          |              |
|               | 313 -> 325 | 0.35470   |           |           |          |              |
| Excited State | 54:        | Singlet-A | 5.3279 eV | 232.71 nm | f=0.0460 | <S**2>=0.000 |
|               | 302 -> 315 | -0.20918  |           |           |          |              |
|               | 305 -> 315 | 0.32401   |           |           |          |              |
|               | 310 -> 319 | 0.14648   |           |           |          |              |
|               | 311 -> 320 | -0.13928  |           |           |          |              |
|               | 312 -> 324 | 0.20683   |           |           |          |              |
|               | 313 -> 323 | 0.13937   |           |           |          |              |
|               | 313 -> 325 | -0.30442  |           |           |          |              |
|               | 314 -> 327 | -0.16922  |           |           |          |              |
|               | 314 -> 331 | -0.13986  |           |           |          |              |
| Excited State | 55:        | Singlet-A | 5.3396 eV | 232.20 nm | f=0.0030 | <S**2>=0.000 |
|               | 301 -> 315 | -0.12694  |           |           |          |              |
|               | 303 -> 315 | 0.64927   |           |           |          |              |
| Excited State | 56:        | Singlet-A | 5.3737 eV | 230.72 nm | f=0.0131 | <S**2>=0.000 |
|               | 305 -> 315 | -0.12545  |           |           |          |              |
|               | 314 -> 329 | 0.57330   |           |           |          |              |
|               | 314 -> 330 | -0.25862  |           |           |          |              |
| Excited State | 57:        | Singlet-A | 5.3774 eV | 230.57 nm | f=0.0020 | <S**2>=0.000 |
|               | 304 -> 315 | -0.11653  |           |           |          |              |
|               | 312 -> 325 | -0.21043  |           |           |          |              |
|               | 313 -> 324 | -0.19197  |           |           |          |              |
|               | 313 -> 325 | -0.10787  |           |           |          |              |
|               | 313 -> 326 | 0.59920   |           |           |          |              |
| Excited State | 58:        | Singlet-A | 5.3923 eV | 229.93 nm | f=0.0041 | <S**2>=0.000 |
|               | 304 -> 315 | 0.62710   |           |           |          |              |
|               | 306 -> 315 | 0.14917   |           |           |          |              |
|               | 314 -> 328 | -0.12361  |           |           |          |              |
| Excited State | 59:        | Singlet-A | 5.4069 eV | 229.31 nm | f=0.0017 | <S**2>=0.000 |
|               | 304 -> 315 | 0.14214   |           |           |          |              |
|               | 309 -> 319 | 0.13716   |           |           |          |              |
|               | 311 -> 321 | 0.10915   |           |           |          |              |
|               | 314 -> 328 | 0.55778   |           |           |          |              |
|               | 314 -> 333 | -0.24805  |           |           |          |              |
| Excited State | 60:        | Singlet-A | 5.4159 eV | 228.93 nm | f=0.0104 | <S**2>=0.000 |
|               | 302 -> 315 | 0.18221   |           |           |          |              |

|                   |           |           |           |          |              |  |  |
|-------------------|-----------|-----------|-----------|----------|--------------|--|--|
| 308 -> 316        | 0.17580   |           |           |          |              |  |  |
| 311 -> 322        | 0.10621   |           |           |          |              |  |  |
| 313 -> 327        | 0.48988   |           |           |          |              |  |  |
| 313 -> 329        | -0.22118  |           |           |          |              |  |  |
| 313 -> 331        | 0.17907   |           |           |          |              |  |  |
| 313 -> 334        | 0.14832   |           |           |          |              |  |  |
| 314 -> 327        | -0.11959  |           |           |          |              |  |  |
| Excited State 61: | Singlet-A | 5.4179 eV | 228.84 nm | f=0.0392 | <S**2>=0.000 |  |  |
| 300 -> 315        | 0.18787   |           |           |          |              |  |  |
| 302 -> 315        | 0.51567   |           |           |          |              |  |  |
| 305 -> 315        | 0.21606   |           |           |          |              |  |  |
| 313 -> 325        | -0.12275  |           |           |          |              |  |  |
| 313 -> 327        | -0.22927  |           |           |          |              |  |  |
| Excited State 62: | Singlet-A | 5.4779 eV | 226.33 nm | f=0.0532 | <S**2>=0.000 |  |  |
| 308 -> 316        | 0.28035   |           |           |          |              |  |  |
| 311 -> 322        | -0.19174  |           |           |          |              |  |  |
| 313 -> 327        | 0.13085   |           |           |          |              |  |  |
| 313 -> 329        | 0.39610   |           |           |          |              |  |  |
| 313 -> 330        | -0.23459  |           |           |          |              |  |  |
| 314 -> 330        | 0.15643   |           |           |          |              |  |  |
| 314 -> 331        | 0.14293   |           |           |          |              |  |  |
| 314 -> 334        | -0.14799  |           |           |          |              |  |  |
| Excited State 63: | Singlet-A | 5.4832 eV | 226.12 nm | f=0.0379 | <S**2>=0.000 |  |  |
| 302 -> 315        | -0.17235  |           |           |          |              |  |  |
| 307 -> 317        | 0.12897   |           |           |          |              |  |  |
| 308 -> 316        | 0.37093   |           |           |          |              |  |  |
| 311 -> 322        | 0.10481   |           |           |          |              |  |  |
| 313 -> 327        | -0.13724  |           |           |          |              |  |  |
| 313 -> 329        | -0.27839  |           |           |          |              |  |  |
| 313 -> 330        | 0.18565   |           |           |          |              |  |  |
| 314 -> 327        | 0.11888   |           |           |          |              |  |  |
| 314 -> 329        | 0.18500   |           |           |          |              |  |  |
| 314 -> 330        | 0.19463   |           |           |          |              |  |  |
| 314 -> 334        | -0.20597  |           |           |          |              |  |  |
| Excited State 64: | Singlet-A | 5.4989 eV | 225.47 nm | f=0.0045 | <S**2>=0.000 |  |  |
| 307 -> 316        | 0.52271   |           |           |          |              |  |  |
| 308 -> 317        | 0.31043   |           |           |          |              |  |  |
| 308 -> 318        | -0.10743  |           |           |          |              |  |  |
| 312 -> 325        | 0.15595   |           |           |          |              |  |  |
| 314 -> 331        | -0.12394  |           |           |          |              |  |  |

JOB name: na92ATD2

Method/Basis: TD-B3LYP-D3/6-311G(d) [hexane]//B3PW91-D3/6-31G(d)

**Table S2.** Transition Energy, Wavelength, and Oscillator Strengths of the Electronic Transition of **6<sub>opt</sub>**

|                  |           |           |           |          |              |  |  |
|------------------|-----------|-----------|-----------|----------|--------------|--|--|
| Excited State 1: | Singlet-A | 2.0528 eV | 603.98 nm | f=0.4077 | <S**2>=0.000 |  |  |
| 314 -> 315       | 0.70275   |           |           |          |              |  |  |
| Excited State 2: | Singlet-A | 2.0911 eV | 592.92 nm | f=0.0000 | <S**2>=0.000 |  |  |
| 313 -> 315       | 0.70490   |           |           |          |              |  |  |
| Excited State 3: | Singlet-A | 2.7307 eV | 454.04 nm | f=0.0000 | <S**2>=0.000 |  |  |
| 314 -> 316       | 0.69919   |           |           |          |              |  |  |
| Excited State 4: | Singlet-A | 2.8777 eV | 430.85 nm | f=0.0002 | <S**2>=0.000 |  |  |
| 312 -> 315       | 0.69931   |           |           |          |              |  |  |
| Excited State 5: | Singlet-A | 2.9647 eV | 418.21 nm | f=0.0148 | <S**2>=0.000 |  |  |
| 314 -> 317       | 0.70261   |           |           |          |              |  |  |

|                                                                                                                 |     |                                                                                            |           |           |          |              |
|-----------------------------------------------------------------------------------------------------------------|-----|--------------------------------------------------------------------------------------------|-----------|-----------|----------|--------------|
| Excited State<br>311 -> 315                                                                                     | 6:  | Singlet-A<br>0.68955                                                                       | 3.2861 eV | 377.30 nm | f=0.0000 | <S**2>=0.000 |
| Excited State<br>314 -> 318                                                                                     | 7:  | Singlet-A<br>0.68943                                                                       | 3.3469 eV | 370.45 nm | f=0.0000 | <S**2>=0.000 |
| Excited State<br>312 -> 317<br>313 -> 316                                                                       | 8:  | Singlet-A<br>0.10179<br>0.68685                                                            | 3.3675 eV | 368.18 nm | f=0.0093 | <S**2>=0.000 |
| Excited State<br>310 -> 315<br>312 -> 316<br>313 -> 317                                                         | 9:  | Singlet-A<br>-0.25987<br>0.13096<br>0.63180                                                | 3.4830 eV | 355.97 nm | f=0.0000 | <S**2>=0.000 |
| Excited State<br>310 -> 315<br>313 -> 317                                                                       | 10: | Singlet-A<br>0.64573<br>0.25038                                                            | 3.5283 eV | 351.40 nm | f=0.0000 | <S**2>=0.000 |
| Excited State<br>314 -> 319<br>314 -> 321                                                                       | 11: | Singlet-A<br>0.67666<br>-0.14868                                                           | 3.6179 eV | 342.69 nm | f=0.0000 | <S**2>=0.000 |
| Excited State<br>308 -> 315<br>309 -> 315<br>314 -> 320                                                         | 12: | Singlet-A<br>0.49966<br>0.44465<br>0.19976                                                 | 3.7133 eV | 333.89 nm | f=0.0001 | <S**2>=0.000 |
| Excited State<br>308 -> 315<br>313 -> 318<br>313 -> 319<br>314 -> 320                                           | 13: | Singlet-A<br>-0.17977<br>0.30884<br>0.12733<br>0.57399                                     | 3.8569 eV | 321.46 nm | f=0.0533 | <S**2>=0.000 |
| Excited State<br>309 -> 315<br>312 -> 317<br>313 -> 318<br>313 -> 319<br>314 -> 320                             | 14: | Singlet-A<br>0.11454<br>0.18481<br>0.56583<br>0.11037<br>-0.31446                          | 3.8632 eV | 320.94 nm | f=0.1376 | <S**2>=0.000 |
| Excited State<br>307 -> 315                                                                                     | 15: | Singlet-A<br>0.68658                                                                       | 3.8733 eV | 320.10 nm | f=0.0000 | <S**2>=0.000 |
| Excited State<br>312 -> 316<br>314 -> 319<br>314 -> 321                                                         | 16: | Singlet-A<br>-0.13599<br>0.12740<br>0.65764                                                | 3.8972 eV | 318.13 nm | f=0.0000 | <S**2>=0.000 |
| Excited State<br>308 -> 315<br>309 -> 315<br>313 -> 319                                                         | 17: | Singlet-A<br>-0.41651<br>0.47827<br>-0.25729                                               | 4.0169 eV | 308.66 nm | f=0.0959 | <S**2>=0.000 |
| Excited State<br>308 -> 315<br>309 -> 315<br>311 -> 316<br>312 -> 317<br>313 -> 318<br>313 -> 319<br>314 -> 323 | 18: | Singlet-A<br>-0.14780<br>0.19190<br>-0.10621<br>0.16651<br>-0.20709<br>0.55270<br>-0.15430 | 4.1693 eV | 297.38 nm | f=0.2024 | <S**2>=0.000 |
| Excited State<br>312 -> 316<br>313 -> 317<br>314 -> 321                                                         | 19: | Singlet-A<br>0.66140<br>-0.11202<br>0.14322                                                | 4.2137 eV | 294.24 nm | f=0.0000 | <S**2>=0.000 |
| Excited State                                                                                                   | 20: | Singlet-A                                                                                  | 4.2495 eV | 291.76 nm | f=0.0501 | <S**2>=0.000 |



|                   |           |           |           |          |              |  |  |
|-------------------|-----------|-----------|-----------|----------|--------------|--|--|
| 311 -> 316        | 0.48512   |           |           |          |              |  |  |
| 312 -> 317        | -0.12252  |           |           |          |              |  |  |
| 313 -> 319        | 0.12705   |           |           |          |              |  |  |
| 314 -> 322        | 0.45162   |           |           |          |              |  |  |
| Excited State 21: | Singlet-A | 4.2836 eV | 289.44 nm | f=0.0447 | <S**2>=0.000 |  |  |
| 311 -> 316        | -0.47160  |           |           |          |              |  |  |
| 312 -> 317        | -0.11432  |           |           |          |              |  |  |
| 314 -> 322        | 0.48708   |           |           |          |              |  |  |
| Excited State 22: | Singlet-A | 4.3395 eV | 285.71 nm | f=0.0000 | <S**2>=0.000 |  |  |
| 312 -> 319        | 0.12718   |           |           |          |              |  |  |
| 313 -> 320        | 0.66021   |           |           |          |              |  |  |
| Excited State 23: | Singlet-A | 4.3469 eV | 285.22 nm | f=0.0610 | <S**2>=0.000 |  |  |
| 312 -> 317        | -0.18404  |           |           |          |              |  |  |
| 313 -> 319        | 0.18721   |           |           |          |              |  |  |
| 313 -> 321        | 0.12356   |           |           |          |              |  |  |
| 314 -> 323        | 0.59012   |           |           |          |              |  |  |
| 314 -> 327        | -0.18260  |           |           |          |              |  |  |
| Excited State 24: | Singlet-A | 4.3875 eV | 282.59 nm | f=0.0815 | <S**2>=0.000 |  |  |
| 312 -> 317        | 0.57471   |           |           |          |              |  |  |
| 313 -> 318        | -0.14533  |           |           |          |              |  |  |
| 313 -> 319        | -0.13401  |           |           |          |              |  |  |
| 314 -> 322        | 0.17962   |           |           |          |              |  |  |
| 314 -> 323        | 0.24951   |           |           |          |              |  |  |
| Excited State 25: | Singlet-A | 4.4079 eV | 281.28 nm | f=0.0000 | <S**2>=0.000 |  |  |
| 314 -> 324        | 0.68365   |           |           |          |              |  |  |
| Excited State 26: | Singlet-A | 4.4596 eV | 278.01 nm | f=0.0000 | <S**2>=0.000 |  |  |
| 308 -> 316        | 0.13205   |           |           |          |              |  |  |
| 309 -> 316        | -0.15154  |           |           |          |              |  |  |
| 311 -> 317        | 0.65864   |           |           |          |              |  |  |
| Excited State 27: | Singlet-A | 4.4821 eV | 276.62 nm | f=0.2879 | <S**2>=0.000 |  |  |
| 312 -> 317        | 0.10595   |           |           |          |              |  |  |
| 312 -> 320        | 0.11493   |           |           |          |              |  |  |
| 313 -> 321        | 0.66628   |           |           |          |              |  |  |
| Excited State 28: | Singlet-A | 4.5136 eV | 274.69 nm | f=0.0207 | <S**2>=0.000 |  |  |
| 306 -> 315        | 0.69678   |           |           |          |              |  |  |
| Excited State 29: | Singlet-A | 4.5155 eV | 274.58 nm | f=0.0000 | <S**2>=0.000 |  |  |
| 314 -> 325        | 0.67235   |           |           |          |              |  |  |
| Excited State 30: | Singlet-A | 4.5445 eV | 272.82 nm | f=0.0000 | <S**2>=0.000 |  |  |
| 303 -> 315        | 0.13891   |           |           |          |              |  |  |
| 305 -> 315        | 0.68327   |           |           |          |              |  |  |
| Excited State 31: | Singlet-A | 4.6132 eV | 268.76 nm | f=0.0088 | <S**2>=0.000 |  |  |
| 304 -> 315        | 0.69937   |           |           |          |              |  |  |
| Excited State 32: | Singlet-A | 4.6546 eV | 266.37 nm | f=0.0000 | <S**2>=0.000 |  |  |
| 303 -> 315        | 0.65953   |           |           |          |              |  |  |
| 305 -> 315        | -0.15273  |           |           |          |              |  |  |
| 312 -> 318        | -0.15373  |           |           |          |              |  |  |
| Excited State 33: | Singlet-A | 4.6902 eV | 264.35 nm | f=0.0000 | <S**2>=0.000 |  |  |
| 303 -> 315        | 0.16444   |           |           |          |              |  |  |
| 312 -> 318        | 0.57595   |           |           |          |              |  |  |
| 312 -> 319        | 0.10672   |           |           |          |              |  |  |
| 313 -> 322        | -0.15721  |           |           |          |              |  |  |
| 314 -> 326        | -0.19717  |           |           |          |              |  |  |
| Excited State 34: | Singlet-A | 4.7218 eV | 262.58 nm | f=0.0000 | <S**2>=0.000 |  |  |
| 312 -> 318        | 0.20607   |           |           |          |              |  |  |
| 314 -> 326        | 0.65178   |           |           |          |              |  |  |

|                   |           |           |           |          |              |
|-------------------|-----------|-----------|-----------|----------|--------------|
| Excited State 35: | Singlet-A | 4.7378 eV | 261.69 nm | f=0.0452 | <S**2>=0.000 |
| 309 -> 317        | -0.11903  |           |           |          |              |
| 310 -> 316        | 0.49036   |           |           |          |              |
| 311 -> 318        | 0.16051   |           |           |          |              |
| 314 -> 323        | -0.13021  |           |           |          |              |
| 314 -> 327        | -0.37784  |           |           |          |              |
| 314 -> 333        | -0.11939  |           |           |          |              |
| Excited State 36: | Singlet-A | 4.7545 eV | 260.77 nm | f=0.0292 | <S**2>=0.000 |
| 310 -> 316        | 0.39117   |           |           |          |              |
| 314 -> 323        | 0.17577   |           |           |          |              |
| 314 -> 327        | 0.52153   |           |           |          |              |
| Excited State 37: | Singlet-A | 4.8515 eV | 255.56 nm | f=0.0376 | <S**2>=0.000 |
| 310 -> 316        | -0.16083  |           |           |          |              |
| 311 -> 318        | 0.59711   |           |           |          |              |
| 314 -> 327        | 0.13466   |           |           |          |              |
| 314 -> 328        | -0.12839  |           |           |          |              |
| 314 -> 329        | 0.12420   |           |           |          |              |
| 314 -> 332        | -0.10725  |           |           |          |              |
| Excited State 38: | Singlet-A | 4.8623 eV | 254.99 nm | f=0.0000 | <S**2>=0.000 |
| 308 -> 316        | 0.15784   |           |           |          |              |
| 310 -> 317        | -0.13372  |           |           |          |              |
| 312 -> 319        | 0.31533   |           |           |          |              |
| 313 -> 320        | -0.13343  |           |           |          |              |
| 313 -> 322        | 0.38014   |           |           |          |              |
| 313 -> 323        | 0.29266   |           |           |          |              |
| 314 -> 330        | -0.18478  |           |           |          |              |
| 314 -> 331        | 0.15126   |           |           |          |              |
| Excited State 39: | Singlet-A | 4.8764 eV | 254.25 nm | f=0.0000 | <S**2>=0.000 |
| 308 -> 316        | -0.25477  |           |           |          |              |
| 309 -> 316        | -0.27380  |           |           |          |              |
| 310 -> 317        | 0.45286   |           |           |          |              |
| 311 -> 320        | -0.11320  |           |           |          |              |
| 312 -> 319        | 0.11204   |           |           |          |              |
| 313 -> 322        | 0.18357   |           |           |          |              |
| 313 -> 323        | -0.16679  |           |           |          |              |
| 314 -> 330        | -0.14200  |           |           |          |              |
| Excited State 40: | Singlet-A | 4.9151 eV | 252.25 nm | f=0.0351 | <S**2>=0.000 |
| 311 -> 318        | 0.21360   |           |           |          |              |
| 314 -> 328        | 0.54425   |           |           |          |              |
| 314 -> 329        | -0.24775  |           |           |          |              |
| 314 -> 332        | 0.16348   |           |           |          |              |
| 314 -> 333        | 0.15266   |           |           |          |              |
| Excited State 41: | Singlet-A | 4.9414 eV | 250.91 nm | f=0.0000 | <S**2>=0.000 |
| 309 -> 316        | -0.19162  |           |           |          |              |
| 310 -> 317        | 0.17743   |           |           |          |              |
| 311 -> 320        | -0.13726  |           |           |          |              |
| 312 -> 318        | -0.12911  |           |           |          |              |
| 313 -> 322        | -0.26368  |           |           |          |              |
| 313 -> 323        | 0.49178   |           |           |          |              |
| 313 -> 327        | -0.14733  |           |           |          |              |
| 314 -> 330        | 0.12700   |           |           |          |              |
| Excited State 42: | Singlet-A | 4.9555 eV | 250.20 nm | f=0.0000 | <S**2>=0.000 |
| 312 -> 318        | 0.10326   |           |           |          |              |
| 312 -> 319        | -0.37983  |           |           |          |              |
| 313 -> 322        | 0.41024   |           |           |          |              |
| 313 -> 323        | 0.18532   |           |           |          |              |
| 314 -> 330        | 0.18778   |           |           |          |              |
| 314 -> 331        | -0.24694  |           |           |          |              |
| Excited State 43: | Singlet-A | 4.9703 eV | 249.45 nm | f=0.0000 | <S**2>=0.000 |
| 307 -> 317        | 0.10959   |           |           |          |              |
| 308 -> 316        | -0.38471  |           |           |          |              |
| 309 -> 316        | 0.41885   |           |           |          |              |

|                   |           |           |           |          |              |  |  |
|-------------------|-----------|-----------|-----------|----------|--------------|--|--|
| 311 -> 317        | 0.17028   |           |           |          |              |  |  |
| 312 -> 319        | -0.10669  |           |           |          |              |  |  |
| 313 -> 323        | 0.17090   |           |           |          |              |  |  |
| 314 -> 330        | -0.18160  |           |           |          |              |  |  |
| 314 -> 331        | 0.17065   |           |           |          |              |  |  |
| Excited State 44: | Singlet-A | 4.9827 eV | 248.83 nm | f=0.0178 | <S**2>=0.000 |  |  |
| 314 -> 328        | 0.38920   |           |           |          |              |  |  |
| 314 -> 329        | 0.47344   |           |           |          |              |  |  |
| 314 -> 332        | -0.10368  |           |           |          |              |  |  |
| 314 -> 333        | -0.19866  |           |           |          |              |  |  |
| 314 -> 335        | 0.16171   |           |           |          |              |  |  |
| Excited State 45: | Singlet-A | 4.9915 eV | 248.39 nm | f=0.0112 | <S**2>=0.000 |  |  |
| 300 -> 315        | 0.22307   |           |           |          |              |  |  |
| 302 -> 315        | -0.18795  |           |           |          |              |  |  |
| 311 -> 319        | 0.15141   |           |           |          |              |  |  |
| 313 -> 324        | 0.54050   |           |           |          |              |  |  |
| 313 -> 325        | 0.14962   |           |           |          |              |  |  |
| 314 -> 332        | -0.12554  |           |           |          |              |  |  |
| Excited State 46: | Singlet-A | 5.0181 eV | 247.07 nm | f=0.0060 | <S**2>=0.000 |  |  |
| 302 -> 315        | 0.65208   |           |           |          |              |  |  |
| 313 -> 324        | 0.17335   |           |           |          |              |  |  |
| 313 -> 325        | 0.10601   |           |           |          |              |  |  |
| Excited State 47: | Singlet-A | 5.0231 eV | 246.83 nm | f=0.0000 | <S**2>=0.000 |  |  |
| 301 -> 315        | 0.43786   |           |           |          |              |  |  |
| 308 -> 316        | -0.11576  |           |           |          |              |  |  |
| 309 -> 316        | 0.14723   |           |           |          |              |  |  |
| 312 -> 319        | 0.22051   |           |           |          |              |  |  |
| 314 -> 330        | 0.38395   |           |           |          |              |  |  |
| Excited State 48: | Singlet-A | 5.0339 eV | 246.30 nm | f=0.0000 | <S**2>=0.000 |  |  |
| 301 -> 315        | 0.54119   |           |           |          |              |  |  |
| 309 -> 316        | -0.11370  |           |           |          |              |  |  |
| 312 -> 319        | -0.20027  |           |           |          |              |  |  |
| 314 -> 330        | -0.30962  |           |           |          |              |  |  |
| Excited State 49: | Singlet-A | 5.0465 eV | 245.68 nm | f=0.0326 | <S**2>=0.000 |  |  |
| 300 -> 315        | 0.62511   |           |           |          |              |  |  |
| 302 -> 315        | 0.16220   |           |           |          |              |  |  |
| 311 -> 319        | -0.12894  |           |           |          |              |  |  |
| 313 -> 325        | -0.15469  |           |           |          |              |  |  |
| Excited State 50: | Singlet-A | 5.0613 eV | 244.97 nm | f=0.0149 | <S**2>=0.000 |  |  |
| 308 -> 317        | -0.16554  |           |           |          |              |  |  |
| 310 -> 316        | -0.12245  |           |           |          |              |  |  |
| 311 -> 319        | -0.25928  |           |           |          |              |  |  |
| 311 -> 321        | 0.11427   |           |           |          |              |  |  |
| 313 -> 324        | 0.17387   |           |           |          |              |  |  |
| 313 -> 325        | 0.19234   |           |           |          |              |  |  |
| 314 -> 329        | 0.17334   |           |           |          |              |  |  |
| 314 -> 332        | 0.42041   |           |           |          |              |  |  |
| 314 -> 333        | -0.15855  |           |           |          |              |  |  |
| 314 -> 335        | -0.16144  |           |           |          |              |  |  |
| Excited State 51: | Singlet-A | 5.0761 eV | 244.25 nm | f=0.0642 | <S**2>=0.000 |  |  |
| 300 -> 315        | 0.11271   |           |           |          |              |  |  |
| 307 -> 316        | 0.30949   |           |           |          |              |  |  |
| 309 -> 317        | 0.13939   |           |           |          |              |  |  |
| 313 -> 324        | -0.18406  |           |           |          |              |  |  |
| 313 -> 325        | 0.49114   |           |           |          |              |  |  |
| 314 -> 329        | -0.11070  |           |           |          |              |  |  |
| 314 -> 335        | 0.10606   |           |           |          |              |  |  |
| Excited State 52: | Singlet-A | 5.0918 eV | 243.50 nm | f=0.0000 | <S**2>=0.000 |  |  |
| 308 -> 316        | 0.31165   |           |           |          |              |  |  |
| 310 -> 317        | 0.20725   |           |           |          |              |  |  |
| 312 -> 319        | -0.20987  |           |           |          |              |  |  |

|                   |           |           |           |          |              |  |  |  |  |
|-------------------|-----------|-----------|-----------|----------|--------------|--|--|--|--|
| 314 -> 330        | 0.13624   |           |           |          |              |  |  |  |  |
| 314 -> 331        | 0.47627   |           |           |          |              |  |  |  |  |
| 314 -> 336        | 0.12759   |           |           |          |              |  |  |  |  |
| Excited State 53: | Singlet-A | 5.1028 eV | 242.97 nm | f=0.0183 | <S**2>=0.000 |  |  |  |  |
| 308 -> 317        | -0.10586  |           |           |          |              |  |  |  |  |
| 311 -> 319        | -0.24776  |           |           |          |              |  |  |  |  |
| 312 -> 320        | 0.13278   |           |           |          |              |  |  |  |  |
| 314 -> 329        | 0.24871   |           |           |          |              |  |  |  |  |
| 314 -> 332        | -0.15328  |           |           |          |              |  |  |  |  |
| 314 -> 333        | 0.52469   |           |           |          |              |  |  |  |  |
| Excited State 54: | Singlet-A | 5.1061 eV | 242.82 nm | f=0.0000 | <S**2>=0.000 |  |  |  |  |
| 308 -> 316        | 0.31854   |           |           |          |              |  |  |  |  |
| 309 -> 316        | 0.33185   |           |           |          |              |  |  |  |  |
| 310 -> 317        | 0.35186   |           |           |          |              |  |  |  |  |
| 314 -> 330        | -0.13696  |           |           |          |              |  |  |  |  |
| 314 -> 331        | -0.27248  |           |           |          |              |  |  |  |  |
| 314 -> 334        | 0.10725   |           |           |          |              |  |  |  |  |
| Excited State 55: | Singlet-A | 5.1194 eV | 242.18 nm | f=0.3424 | <S**2>=0.000 |  |  |  |  |
| 307 -> 316        | 0.40340   |           |           |          |              |  |  |  |  |
| 308 -> 317        | -0.11620  |           |           |          |              |  |  |  |  |
| 309 -> 317        | 0.33296   |           |           |          |              |  |  |  |  |
| 313 -> 324        | 0.13345   |           |           |          |              |  |  |  |  |
| 313 -> 325        | -0.32121  |           |           |          |              |  |  |  |  |
| 314 -> 332        | 0.10259   |           |           |          |              |  |  |  |  |
| Excited State 56: | Singlet-A | 5.1394 eV | 241.24 nm | f=0.0245 | <S**2>=0.000 |  |  |  |  |
| 308 -> 317        | 0.25470   |           |           |          |              |  |  |  |  |
| 310 -> 319        | -0.10353  |           |           |          |              |  |  |  |  |
| 311 -> 319        | 0.30968   |           |           |          |              |  |  |  |  |
| 312 -> 320        | -0.19987  |           |           |          |              |  |  |  |  |
| 313 -> 324        | -0.15515  |           |           |          |              |  |  |  |  |
| 314 -> 329        | 0.21762   |           |           |          |              |  |  |  |  |
| 314 -> 332        | 0.34019   |           |           |          |              |  |  |  |  |
| 314 -> 333        | 0.22336   |           |           |          |              |  |  |  |  |
| Excited State 57: | Singlet-A | 5.1766 eV | 239.51 nm | f=0.0585 | <S**2>=0.000 |  |  |  |  |
| 299 -> 315        | -0.15016  |           |           |          |              |  |  |  |  |
| 308 -> 317        | 0.11960   |           |           |          |              |  |  |  |  |
| 310 -> 318        | -0.16187  |           |           |          |              |  |  |  |  |
| 311 -> 319        | 0.15236   |           |           |          |              |  |  |  |  |
| 312 -> 320        | 0.55927   |           |           |          |              |  |  |  |  |
| 314 -> 332        | 0.11469   |           |           |          |              |  |  |  |  |
| Excited State 58: | Singlet-A | 5.1801 eV | 239.35 nm | f=0.0000 | <S**2>=0.000 |  |  |  |  |
| 310 -> 317        | -0.10888  |           |           |          |              |  |  |  |  |
| 314 -> 330        | -0.11979  |           |           |          |              |  |  |  |  |
| 314 -> 334        | 0.57267   |           |           |          |              |  |  |  |  |
| 314 -> 337        | -0.20971  |           |           |          |              |  |  |  |  |
| 314 -> 340        | -0.19510  |           |           |          |              |  |  |  |  |
| Excited State 59: | Singlet-A | 5.2016 eV | 238.36 nm | f=0.0384 | <S**2>=0.000 |  |  |  |  |
| 311 -> 319        | -0.17822  |           |           |          |              |  |  |  |  |
| 314 -> 332        | 0.17884   |           |           |          |              |  |  |  |  |
| 314 -> 335        | 0.51503   |           |           |          |              |  |  |  |  |
| 314 -> 338        | 0.28327   |           |           |          |              |  |  |  |  |
| 314 -> 341        | -0.10536  |           |           |          |              |  |  |  |  |
| Excited State 60: | Singlet-A | 5.2238 eV | 237.34 nm | f=0.0031 | <S**2>=0.000 |  |  |  |  |
| 299 -> 315        | 0.65191   |           |           |          |              |  |  |  |  |
| 312 -> 320        | 0.15433   |           |           |          |              |  |  |  |  |
| Excited State 61: | Singlet-A | 5.2314 eV | 237.00 nm | f=0.0005 | <S**2>=0.000 |  |  |  |  |
| 297 -> 315        | 0.13628   |           |           |          |              |  |  |  |  |
| 298 -> 315        | 0.67630   |           |           |          |              |  |  |  |  |
| Excited State 62: | Singlet-A | 5.2323 eV | 236.96 nm | f=0.3561 | <S**2>=0.000 |  |  |  |  |
| 299 -> 315        | 0.12787   |           |           |          |              |  |  |  |  |

|                   |           |           |           |          |              |  |  |
|-------------------|-----------|-----------|-----------|----------|--------------|--|--|
| 307 -> 316        | -0.42196  |           |           |          |              |  |  |
| 308 -> 317        | -0.13242  |           |           |          |              |  |  |
| 309 -> 317        | 0.44674   |           |           |          |              |  |  |
| 311 -> 321        | 0.14238   |           |           |          |              |  |  |
| Excited State 63: | Singlet-A | 5.2544 eV | 235.96 nm | f=0.0997 | <S**2>=0.000 |  |  |
| 308 -> 317        | 0.45264   |           |           |          |              |  |  |
| 310 -> 318        | -0.18666  |           |           |          |              |  |  |
| 311 -> 319        | -0.30452  |           |           |          |              |  |  |
| 311 -> 321        | 0.22987   |           |           |          |              |  |  |
| 312 -> 320        | -0.10913  |           |           |          |              |  |  |
| 313 -> 326        | 0.10676   |           |           |          |              |  |  |
| 314 -> 332        | -0.12037  |           |           |          |              |  |  |
| 314 -> 338        | 0.13582   |           |           |          |              |  |  |
| Excited State 64: | Singlet-A | 5.2663 eV | 235.43 nm | f=0.0000 | <S**2>=0.000 |  |  |
| 286 -> 315        | -0.11222  |           |           |          |              |  |  |
| 293 -> 315        | 0.25971   |           |           |          |              |  |  |
| 297 -> 315        | 0.55334   |           |           |          |              |  |  |
| 307 -> 317        | -0.22199  |           |           |          |              |  |  |
| 312 -> 321        | 0.13920   |           |           |          |              |  |  |

---

JOB name: na92BTD2

Method/Basis: TD-B3LYP-D3/6-311G(d) [hexane]//B3PW91-D3/6-31G(d)

**Table S3.** Transition Energy, Wavelength, and Oscillator Strengths of the Electronic Transition of 7<sub>opt</sub>

|                  |           |           |           |          |              |  |  |
|------------------|-----------|-----------|-----------|----------|--------------|--|--|
| Excited State 1: | Singlet-A | 2.4657 eV | 502.83 nm | f=0.0131 | <S**2>=0.000 |  |  |
| 314 -> 315       | 0.68157   |           |           |          |              |  |  |
| 314 -> 316       | 0.14239   |           |           |          |              |  |  |
| Excited State 2: | Singlet-A | 2.7108 eV | 457.37 nm | f=0.0146 | <S**2>=0.000 |  |  |
| 314 -> 315       | -0.13603  |           |           |          |              |  |  |
| 314 -> 316       | 0.68790   |           |           |          |              |  |  |
| Excited State 3: | Singlet-A | 3.0149 eV | 411.23 nm | f=0.0065 | <S**2>=0.000 |  |  |
| 311 -> 315       | -0.10574  |           |           |          |              |  |  |
| 313 -> 315       | 0.66578   |           |           |          |              |  |  |
| 314 -> 317       | -0.18393  |           |           |          |              |  |  |
| Excited State 4: | Singlet-A | 3.1799 eV | 389.90 nm | f=0.0372 | <S**2>=0.000 |  |  |
| 311 -> 315       | -0.10628  |           |           |          |              |  |  |
| 312 -> 315       | 0.13020   |           |           |          |              |  |  |
| 313 -> 315       | 0.15095   |           |           |          |              |  |  |
| 314 -> 317       | 0.65822   |           |           |          |              |  |  |
| Excited State 5: | Singlet-A | 3.3261 eV | 372.76 nm | f=0.0062 | <S**2>=0.000 |  |  |
| 314 -> 318       | 0.69068   |           |           |          |              |  |  |
| Excited State 6: | Singlet-A | 3.3633 eV | 368.64 nm | f=0.0041 | <S**2>=0.000 |  |  |
| 313 -> 316       | 0.68947   |           |           |          |              |  |  |
| Excited State 7: | Singlet-A | 3.3698 eV | 367.93 nm | f=0.0191 | <S**2>=0.000 |  |  |
| 311 -> 315       | 0.13769   |           |           |          |              |  |  |
| 312 -> 315       | 0.66380   |           |           |          |              |  |  |
| Excited State 8: | Singlet-A | 3.5502 eV | 349.23 nm | f=0.0309 | <S**2>=0.000 |  |  |
| 311 -> 315       | 0.65584   |           |           |          |              |  |  |
| 313 -> 315       | 0.12025   |           |           |          |              |  |  |

|                   |           |           |           |          |              |
|-------------------|-----------|-----------|-----------|----------|--------------|
| Excited State 9:  | Singlet-A | 3.6953 eV | 335.52 nm | f=0.0069 | <S**2>=0.000 |
| 314 -> 319        | 0.68213   |           |           |          |              |
| Excited State 10: | Singlet-A | 3.7322 eV | 332.20 nm | f=0.0293 | <S**2>=0.000 |
| 311 -> 316        | -0.23009  |           |           |          |              |
| 312 -> 316        | 0.64985   |           |           |          |              |
| Excited State 11: | Singlet-A | 3.8476 eV | 322.24 nm | f=0.0037 | <S**2>=0.000 |
| 311 -> 316        | 0.45035   |           |           |          |              |
| 312 -> 316        | 0.17004   |           |           |          |              |
| 313 -> 317        | -0.10416  |           |           |          |              |
| 314 -> 320        | 0.49503   |           |           |          |              |
| Excited State 12: | Singlet-A | 3.8935 eV | 318.44 nm | f=0.0181 | <S**2>=0.000 |
| 310 -> 315        | 0.33556   |           |           |          |              |
| 311 -> 316        | 0.34483   |           |           |          |              |
| 313 -> 317        | 0.35327   |           |           |          |              |
| 313 -> 318        | -0.17848  |           |           |          |              |
| 314 -> 320        | -0.28176  |           |           |          |              |
| Excited State 13: | Singlet-A | 3.9161 eV | 316.60 nm | f=0.0063 | <S**2>=0.000 |
| 310 -> 315        | 0.58859   |           |           |          |              |
| 312 -> 316        | -0.12042  |           |           |          |              |
| 313 -> 317        | -0.27261  |           |           |          |              |
| 313 -> 318        | 0.17876   |           |           |          |              |
| Excited State 14: | Singlet-A | 3.9540 eV | 313.57 nm | f=0.0312 | <S**2>=0.000 |
| 311 -> 316        | -0.23146  |           |           |          |              |
| 313 -> 317        | 0.51518   |           |           |          |              |
| 313 -> 318        | 0.19308   |           |           |          |              |
| 314 -> 320        | 0.32690   |           |           |          |              |
| Excited State 15: | Singlet-A | 4.0677 eV | 304.80 nm | f=0.0730 | <S**2>=0.000 |
| 309 -> 315        | -0.12822  |           |           |          |              |
| 310 -> 316        | -0.10884  |           |           |          |              |
| 311 -> 316        | 0.17680   |           |           |          |              |
| 312 -> 316        | 0.10367   |           |           |          |              |
| 312 -> 317        | 0.18480   |           |           |          |              |
| 313 -> 318        | 0.57722   |           |           |          |              |
| 314 -> 320        | -0.15639  |           |           |          |              |
| 314 -> 321        | -0.10220  |           |           |          |              |
| Excited State 16: | Singlet-A | 4.2206 eV | 293.76 nm | f=0.0164 | <S**2>=0.000 |
| 309 -> 315        | -0.27369  |           |           |          |              |
| 310 -> 316        | 0.51328   |           |           |          |              |
| 312 -> 318        | -0.12011  |           |           |          |              |
| 313 -> 319        | 0.17671   |           |           |          |              |
| 314 -> 321        | -0.27168  |           |           |          |              |
| Excited State 17: | Singlet-A | 4.2360 eV | 292.69 nm | f=0.0063 | <S**2>=0.000 |
| 309 -> 315        | 0.50102   |           |           |          |              |
| 310 -> 316        | 0.20899   |           |           |          |              |
| 312 -> 317        | 0.33858   |           |           |          |              |
| 313 -> 319        | 0.14624   |           |           |          |              |
| 314 -> 321        | -0.18072  |           |           |          |              |
| Excited State 18: | Singlet-A | 4.2591 eV | 291.10 nm | f=0.0328 | <S**2>=0.000 |
| 310 -> 316        | 0.34037   |           |           |          |              |
| 312 -> 317        | 0.13702   |           |           |          |              |
| 312 -> 318        | 0.13129   |           |           |          |              |
| 314 -> 321        | 0.55705   |           |           |          |              |
| Excited State 19: | Singlet-A | 4.3216 eV | 286.89 nm | f=0.1076 | <S**2>=0.000 |

|                   |           |           |           |          |              |  |  |
|-------------------|-----------|-----------|-----------|----------|--------------|--|--|
| 309 -> 315        | -0.20885  |           |           |          |              |  |  |
| 310 -> 316        | -0.16482  |           |           |          |              |  |  |
| 311 -> 317        | 0.10639   |           |           |          |              |  |  |
| 312 -> 317        | 0.38989   |           |           |          |              |  |  |
| 313 -> 318        | -0.15009  |           |           |          |              |  |  |
| 313 -> 319        | 0.28179   |           |           |          |              |  |  |
| 313 -> 320        | 0.10539   |           |           |          |              |  |  |
| 314 -> 322        | -0.33839  |           |           |          |              |  |  |
| Excited State 20: | Singlet-A | 4.3591 eV | 284.42 nm | f=0.0093 | <S**2>=0.000 |  |  |
| 309 -> 315        | -0.21595  |           |           |          |              |  |  |
| 312 -> 317        | 0.12469   |           |           |          |              |  |  |
| 313 -> 319        | 0.25420   |           |           |          |              |  |  |
| 314 -> 322        | 0.55854   |           |           |          |              |  |  |
| Excited State 21: | Singlet-A | 4.3724 eV | 283.56 nm | f=0.0855 | <S**2>=0.000 |  |  |
| 310 -> 316        | -0.11539  |           |           |          |              |  |  |
| 311 -> 317        | -0.25463  |           |           |          |              |  |  |
| 312 -> 317        | -0.26695  |           |           |          |              |  |  |
| 312 -> 318        | 0.18440   |           |           |          |              |  |  |
| 313 -> 319        | 0.46275   |           |           |          |              |  |  |
| 313 -> 320        | -0.14711  |           |           |          |              |  |  |
| 314 -> 322        | -0.12751  |           |           |          |              |  |  |
| Excited State 22: | Singlet-A | 4.4343 eV | 279.60 nm | f=0.0032 | <S**2>=0.000 |  |  |
| 311 -> 317        | 0.52879   |           |           |          |              |  |  |
| 312 -> 317        | -0.18851  |           |           |          |              |  |  |
| 312 -> 318        | 0.36407   |           |           |          |              |  |  |
| Excited State 23: | Singlet-A | 4.4634 eV | 277.78 nm | f=0.0547 | <S**2>=0.000 |  |  |
| 309 -> 315        | -0.10919  |           |           |          |              |  |  |
| 309 -> 316        | 0.12726   |           |           |          |              |  |  |
| 311 -> 317        | -0.32642  |           |           |          |              |  |  |
| 311 -> 318        | -0.21101  |           |           |          |              |  |  |
| 312 -> 318        | 0.48039   |           |           |          |              |  |  |
| 313 -> 319        | -0.18027  |           |           |          |              |  |  |
| 313 -> 320        | 0.11770   |           |           |          |              |  |  |
| 314 -> 321        | -0.10970  |           |           |          |              |  |  |
| Excited State 24: | Singlet-A | 4.5278 eV | 273.83 nm | f=0.0138 | <S**2>=0.000 |  |  |
| 309 -> 316        | 0.13096   |           |           |          |              |  |  |
| 314 -> 323        | 0.61245   |           |           |          |              |  |  |
| 314 -> 324        | -0.20173  |           |           |          |              |  |  |
| Excited State 25: | Singlet-A | 4.5690 eV | 271.36 nm | f=0.0250 | <S**2>=0.000 |  |  |
| 311 -> 318        | 0.47527   |           |           |          |              |  |  |
| 313 -> 320        | 0.45563   |           |           |          |              |  |  |
| 314 -> 323        | -0.10981  |           |           |          |              |  |  |
| Excited State 26: | Singlet-A | 4.6007 eV | 269.49 nm | f=0.0078 | <S**2>=0.000 |  |  |
| 308 -> 315        | -0.12694  |           |           |          |              |  |  |
| 309 -> 316        | 0.48308   |           |           |          |              |  |  |
| 311 -> 318        | 0.26150   |           |           |          |              |  |  |
| 313 -> 320        | -0.36558  |           |           |          |              |  |  |
| Excited State 27: | Singlet-A | 4.6632 eV | 265.88 nm | f=0.1828 | <S**2>=0.000 |  |  |
| 305 -> 315        | -0.10017  |           |           |          |              |  |  |
| 308 -> 315        | -0.15987  |           |           |          |              |  |  |
| 309 -> 316        | -0.33135  |           |           |          |              |  |  |
| 311 -> 318        | 0.29102   |           |           |          |              |  |  |
| 311 -> 319        | -0.10242  |           |           |          |              |  |  |
| 312 -> 319        | 0.34614   |           |           |          |              |  |  |
| 313 -> 319        | -0.12111  |           |           |          |              |  |  |

|                   |           |           |           |          |              |  |  |  |  |
|-------------------|-----------|-----------|-----------|----------|--------------|--|--|--|--|
| 313 -> 320        | -0.13694  |           |           |          |              |  |  |  |  |
| 314 -> 325        | -0.17292  |           |           |          |              |  |  |  |  |
| Excited State 28: | Singlet-A | 4.6808 eV | 264.88 nm | f=0.0495 | <S**2>=0.000 |  |  |  |  |
| 308 -> 315        | 0.19147   |           |           |          |              |  |  |  |  |
| 312 -> 319        | 0.13948   |           |           |          |              |  |  |  |  |
| 314 -> 325        | 0.56721   |           |           |          |              |  |  |  |  |
| 314 -> 327        | 0.16634   |           |           |          |              |  |  |  |  |
| Excited State 29: | Singlet-A | 4.7040 eV | 263.57 nm | f=0.0063 | <S**2>=0.000 |  |  |  |  |
| 305 -> 315        | 0.19044   |           |           |          |              |  |  |  |  |
| 307 -> 315        | -0.10431  |           |           |          |              |  |  |  |  |
| 308 -> 315        | 0.51471   |           |           |          |              |  |  |  |  |
| 309 -> 316        | 0.12602   |           |           |          |              |  |  |  |  |
| 312 -> 319        | 0.21865   |           |           |          |              |  |  |  |  |
| 314 -> 323        | -0.10755  |           |           |          |              |  |  |  |  |
| 314 -> 325        | -0.22059  |           |           |          |              |  |  |  |  |
| Excited State 30: | Singlet-A | 4.7523 eV | 260.90 nm | f=0.1704 | <S**2>=0.000 |  |  |  |  |
| 308 -> 315        | -0.17237  |           |           |          |              |  |  |  |  |
| 309 -> 316        | 0.22643   |           |           |          |              |  |  |  |  |
| 311 -> 318        | -0.12563  |           |           |          |              |  |  |  |  |
| 311 -> 319        | -0.15532  |           |           |          |              |  |  |  |  |
| 312 -> 318        | -0.12384  |           |           |          |              |  |  |  |  |
| 312 -> 319        | 0.44773   |           |           |          |              |  |  |  |  |
| 313 -> 320        | 0.19383   |           |           |          |              |  |  |  |  |
| 314 -> 326        | 0.14269   |           |           |          |              |  |  |  |  |
| Excited State 31: | Singlet-A | 4.7813 eV | 259.31 nm | f=0.0527 | <S**2>=0.000 |  |  |  |  |
| 313 -> 320        | -0.11032  |           |           |          |              |  |  |  |  |
| 314 -> 324        | 0.14108   |           |           |          |              |  |  |  |  |
| 314 -> 325        | -0.12495  |           |           |          |              |  |  |  |  |
| 314 -> 326        | 0.59057   |           |           |          |              |  |  |  |  |
| 314 -> 327        | 0.14373   |           |           |          |              |  |  |  |  |
| Excited State 32: | Singlet-A | 4.8332 eV | 256.53 nm | f=0.0139 | <S**2>=0.000 |  |  |  |  |
| 305 -> 315        | -0.10198  |           |           |          |              |  |  |  |  |
| 307 -> 315        | -0.27470  |           |           |          |              |  |  |  |  |
| 310 -> 317        | 0.56070   |           |           |          |              |  |  |  |  |
| 310 -> 318        | -0.12472  |           |           |          |              |  |  |  |  |
| Excited State 33: | Singlet-A | 4.8635 eV | 254.93 nm | f=0.0101 | <S**2>=0.000 |  |  |  |  |
| 311 -> 319        | -0.20180  |           |           |          |              |  |  |  |  |
| 312 -> 319        | -0.11970  |           |           |          |              |  |  |  |  |
| 313 -> 321        | 0.11936   |           |           |          |              |  |  |  |  |
| 314 -> 323        | 0.15934   |           |           |          |              |  |  |  |  |
| 314 -> 324        | 0.43876   |           |           |          |              |  |  |  |  |
| 314 -> 325        | -0.17664  |           |           |          |              |  |  |  |  |
| 314 -> 326        | -0.25723  |           |           |          |              |  |  |  |  |
| 314 -> 327        | 0.19462   |           |           |          |              |  |  |  |  |
| 314 -> 328        | -0.14024  |           |           |          |              |  |  |  |  |
| Excited State 34: | Singlet-A | 4.8687 eV | 254.66 nm | f=0.0380 | <S**2>=0.000 |  |  |  |  |
| 307 -> 315        | 0.54078   |           |           |          |              |  |  |  |  |
| 308 -> 315        | 0.10789   |           |           |          |              |  |  |  |  |
| 310 -> 317        | 0.25564   |           |           |          |              |  |  |  |  |
| 310 -> 318        | -0.14587  |           |           |          |              |  |  |  |  |
| 311 -> 319        | 0.15964   |           |           |          |              |  |  |  |  |
| 314 -> 324        | 0.16372   |           |           |          |              |  |  |  |  |
| 314 -> 326        | -0.10729  |           |           |          |              |  |  |  |  |
| Excited State 35: | Singlet-A | 4.8954 eV | 253.27 nm | f=0.0005 | <S**2>=0.000 |  |  |  |  |
| 307 -> 315        | -0.24025  |           |           |          |              |  |  |  |  |



|                   |           |           |           |          |              |  |  |
|-------------------|-----------|-----------|-----------|----------|--------------|--|--|
| 311 -> 319        | 0.50220   |           |           |          |              |  |  |
| 312 -> 319        | 0.20924   |           |           |          |              |  |  |
| 313 -> 321        | -0.18767  |           |           |          |              |  |  |
| 314 -> 324        | 0.19735   |           |           |          |              |  |  |
| Excited State 36: | Singlet-A | 4.9333 eV | 251.32 nm | f=0.0038 | <S**2>=0.000 |  |  |
| 305 -> 315        | 0.15797   |           |           |          |              |  |  |
| 306 -> 315        | 0.18603   |           |           |          |              |  |  |
| 308 -> 315        | -0.15597  |           |           |          |              |  |  |
| 311 -> 319        | 0.17166   |           |           |          |              |  |  |
| 311 -> 320        | 0.15170   |           |           |          |              |  |  |
| 313 -> 321        | 0.45258   |           |           |          |              |  |  |
| 313 -> 322        | 0.13196   |           |           |          |              |  |  |
| 314 -> 328        | -0.23196  |           |           |          |              |  |  |
| Excited State 37: | Singlet-A | 4.9396 eV | 251.00 nm | f=0.0128 | <S**2>=0.000 |  |  |
| 306 -> 315        | 0.13619   |           |           |          |              |  |  |
| 310 -> 318        | -0.27824  |           |           |          |              |  |  |
| 313 -> 321        | 0.13585   |           |           |          |              |  |  |
| 314 -> 324        | 0.21185   |           |           |          |              |  |  |
| 314 -> 327        | -0.11152  |           |           |          |              |  |  |
| 314 -> 328        | 0.46445   |           |           |          |              |  |  |
| 314 -> 329        | -0.17703  |           |           |          |              |  |  |
| Excited State 38: | Singlet-A | 4.9518 eV | 250.38 nm | f=0.0011 | <S**2>=0.000 |  |  |
| 304 -> 315        | -0.13437  |           |           |          |              |  |  |
| 305 -> 315        | -0.20934  |           |           |          |              |  |  |
| 306 -> 315        | -0.29821  |           |           |          |              |  |  |
| 308 -> 315        | 0.14312   |           |           |          |              |  |  |
| 310 -> 318        | 0.26565   |           |           |          |              |  |  |
| 311 -> 319        | 0.18177   |           |           |          |              |  |  |
| 312 -> 320        | -0.15783  |           |           |          |              |  |  |
| 313 -> 321        | 0.32164   |           |           |          |              |  |  |
| 314 -> 328        | 0.22791   |           |           |          |              |  |  |
| Excited State 39: | Singlet-A | 4.9876 eV | 248.58 nm | f=0.1324 | <S**2>=0.000 |  |  |
| 305 -> 315        | 0.21355   |           |           |          |              |  |  |
| 306 -> 315        | 0.22908   |           |           |          |              |  |  |
| 310 -> 317        | 0.20416   |           |           |          |              |  |  |
| 310 -> 318        | 0.46373   |           |           |          |              |  |  |
| 311 -> 320        | 0.12253   |           |           |          |              |  |  |
| 313 -> 321        | -0.12416  |           |           |          |              |  |  |
| 314 -> 328        | 0.15405   |           |           |          |              |  |  |
| 314 -> 329        | -0.11219  |           |           |          |              |  |  |
| Excited State 40: | Singlet-A | 4.9935 eV | 248.29 nm | f=0.0039 | <S**2>=0.000 |  |  |
| 312 -> 320        | 0.37361   |           |           |          |              |  |  |
| 313 -> 321        | 0.16739   |           |           |          |              |  |  |
| 313 -> 322        | -0.15160  |           |           |          |              |  |  |
| 314 -> 324        | -0.22788  |           |           |          |              |  |  |
| 314 -> 327        | 0.41385   |           |           |          |              |  |  |
| 314 -> 328        | 0.14154   |           |           |          |              |  |  |
| Excited State 41: | Singlet-A | 5.0029 eV | 247.83 nm | f=0.0135 | <S**2>=0.000 |  |  |
| 310 -> 318        | 0.19055   |           |           |          |              |  |  |
| 312 -> 320        | 0.41951   |           |           |          |              |  |  |
| 313 -> 321        | 0.10920   |           |           |          |              |  |  |
| 313 -> 322        | -0.12503  |           |           |          |              |  |  |
| 314 -> 324        | 0.13025   |           |           |          |              |  |  |
| 314 -> 327        | -0.39561  |           |           |          |              |  |  |
| 314 -> 328        | -0.11671  |           |           |          |              |  |  |
| 314 -> 329        | -0.10324  |           |           |          |              |  |  |

|                   |           |           |           |          |              |
|-------------------|-----------|-----------|-----------|----------|--------------|
| Excited State 42: | Singlet-A | 5.0306 eV | 246.46 nm | f=0.0059 | <S**2>=0.000 |
| 304 -> 315        | -0.34165  |           |           |          |              |
| 305 -> 315        | 0.47761   |           |           |          |              |
| 306 -> 315        | -0.29493  |           |           |          |              |
| Excited State 43: | Singlet-A | 5.0571 eV | 245.17 nm | f=0.0939 | <S**2>=0.000 |
| 304 -> 315        | 0.11333   |           |           |          |              |
| 306 -> 315        | -0.17730  |           |           |          |              |
| 308 -> 316        | -0.12969  |           |           |          |              |
| 311 -> 319        | -0.12338  |           |           |          |              |
| 312 -> 320        | 0.21739   |           |           |          |              |
| 313 -> 322        | 0.53669   |           |           |          |              |
| 314 -> 329        | -0.11125  |           |           |          |              |
| Excited State 44: | Singlet-A | 5.0779 eV | 244.17 nm | f=0.0024 | <S**2>=0.000 |
| 304 -> 315        | 0.47943   |           |           |          |              |
| 305 -> 315        | 0.12929   |           |           |          |              |
| 306 -> 315        | -0.36507  |           |           |          |              |
| 308 -> 316        | -0.15872  |           |           |          |              |
| 311 -> 320        | 0.15124   |           |           |          |              |
| 313 -> 322        | -0.20170  |           |           |          |              |
| Excited State 45: | Singlet-A | 5.0893 eV | 243.62 nm | f=0.0796 | <S**2>=0.000 |
| 304 -> 315        | -0.10829  |           |           |          |              |
| 308 -> 316        | -0.17474  |           |           |          |              |
| 309 -> 318        | -0.13397  |           |           |          |              |
| 310 -> 319        | 0.11093   |           |           |          |              |
| 311 -> 320        | 0.22464   |           |           |          |              |
| 312 -> 320        | 0.16966   |           |           |          |              |
| 313 -> 323        | 0.13953   |           |           |          |              |
| 314 -> 328        | 0.13683   |           |           |          |              |
| 314 -> 329        | 0.37383   |           |           |          |              |
| 314 -> 330        | -0.18736  |           |           |          |              |
| 314 -> 332        | 0.17879   |           |           |          |              |
| 314 -> 333        | -0.11299  |           |           |          |              |
| Excited State 46: | Singlet-A | 5.1113 eV | 242.57 nm | f=0.1688 | <S**2>=0.000 |
| 304 -> 315        | 0.16944   |           |           |          |              |
| 305 -> 315        | 0.12984   |           |           |          |              |
| 305 -> 316        | 0.14102   |           |           |          |              |
| 308 -> 316        | 0.29889   |           |           |          |              |
| 309 -> 317        | 0.16448   |           |           |          |              |
| 309 -> 318        | 0.14291   |           |           |          |              |
| 311 -> 320        | -0.24898  |           |           |          |              |
| 313 -> 322        | 0.14798   |           |           |          |              |
| 313 -> 323        | -0.14313  |           |           |          |              |
| 314 -> 329        | 0.28500   |           |           |          |              |
| Excited State 47: | Singlet-A | 5.1422 eV | 241.11 nm | f=0.0240 | <S**2>=0.000 |
| 303 -> 315        | -0.10340  |           |           |          |              |
| 305 -> 315        | -0.12127  |           |           |          |              |
| 308 -> 316        | 0.37004   |           |           |          |              |
| 309 -> 317        | 0.10638   |           |           |          |              |
| 311 -> 320        | 0.44795   |           |           |          |              |
| 313 -> 322        | 0.15032   |           |           |          |              |
| Excited State 48: | Singlet-A | 5.1756 eV | 239.56 nm | f=0.0498 | <S**2>=0.000 |
| 307 -> 316        | 0.10076   |           |           |          |              |
| 308 -> 316        | -0.14623  |           |           |          |              |
| 309 -> 317        | 0.55487   |           |           |          |              |
| 310 -> 319        | -0.30169  |           |           |          |              |
| Excited State 49: | Singlet-A | 5.2118 eV | 237.89 nm | f=0.0101 | <S**2>=0.000 |

|                   |           |           |           |          |              |  |  |
|-------------------|-----------|-----------|-----------|----------|--------------|--|--|
| 304 -> 316        | 0.10584   |           |           |          |              |  |  |
| 305 -> 316        | 0.13165   |           |           |          |              |  |  |
| 306 -> 316        | 0.14406   |           |           |          |              |  |  |
| 307 -> 316        | 0.36949   |           |           |          |              |  |  |
| 309 -> 317        | -0.12498  |           |           |          |              |  |  |
| 310 -> 319        | -0.11791  |           |           |          |              |  |  |
| 312 -> 321        | -0.13996  |           |           |          |              |  |  |
| 313 -> 323        | 0.33317   |           |           |          |              |  |  |
| 313 -> 324        | -0.10388  |           |           |          |              |  |  |
| 314 -> 329        | 0.13009   |           |           |          |              |  |  |
| 314 -> 330        | 0.24601   |           |           |          |              |  |  |
|                   |           |           |           |          |              |  |  |
| Excited State 50: | Singlet-A | 5.2221 eV | 237.42 nm | f=0.1324 | <S**2>=0.000 |  |  |
| 303 -> 315        | -0.12443  |           |           |          |              |  |  |
| 307 -> 316        | -0.26195  |           |           |          |              |  |  |
| 309 -> 317        | 0.25322   |           |           |          |              |  |  |
| 310 -> 319        | 0.25381   |           |           |          |              |  |  |
| 311 -> 320        | -0.17161  |           |           |          |              |  |  |
| 312 -> 321        | -0.15091  |           |           |          |              |  |  |
| 313 -> 323        | 0.37105   |           |           |          |              |  |  |
| 313 -> 324        | -0.10924  |           |           |          |              |  |  |
|                   |           |           |           |          |              |  |  |
| Excited State 51: | Singlet-A | 5.2300 eV | 237.07 nm | f=0.0227 | <S**2>=0.000 |  |  |
| 307 -> 316        | 0.38222   |           |           |          |              |  |  |
| 309 -> 317        | 0.13518   |           |           |          |              |  |  |
| 310 -> 319        | 0.23960   |           |           |          |              |  |  |
| 314 -> 329        | -0.30238  |           |           |          |              |  |  |
| 314 -> 330        | -0.28793  |           |           |          |              |  |  |
| 314 -> 334        | -0.10472  |           |           |          |              |  |  |
|                   |           |           |           |          |              |  |  |
| Excited State 52: | Singlet-A | 5.2675 eV | 235.37 nm | f=0.0447 | <S**2>=0.000 |  |  |
| 303 -> 315        | -0.14932  |           |           |          |              |  |  |
| 307 -> 316        | 0.15275   |           |           |          |              |  |  |
| 310 -> 319        | 0.35710   |           |           |          |              |  |  |
| 312 -> 321        | 0.18221   |           |           |          |              |  |  |
| 313 -> 323        | -0.21748  |           |           |          |              |  |  |
| 314 -> 329        | 0.13390   |           |           |          |              |  |  |
| 314 -> 330        | 0.35784   |           |           |          |              |  |  |
|                   |           |           |           |          |              |  |  |
| Excited State 53: | Singlet-A | 5.2935 eV | 234.22 nm | f=0.0011 | <S**2>=0.000 |  |  |
| 303 -> 315        | 0.51738   |           |           |          |              |  |  |
| 304 -> 316        | -0.14477  |           |           |          |              |  |  |
| 305 -> 316        | -0.12506  |           |           |          |              |  |  |
| 306 -> 316        | -0.27895  |           |           |          |              |  |  |
| 307 -> 316        | 0.12369   |           |           |          |              |  |  |
| 308 -> 316        | 0.15660   |           |           |          |              |  |  |
|                   |           |           |           |          |              |  |  |
| Excited State 54: | Singlet-A | 5.3067 eV | 233.64 nm | f=0.0430 | <S**2>=0.000 |  |  |
| 303 -> 315        | 0.27732   |           |           |          |              |  |  |
| 304 -> 316        | 0.10569   |           |           |          |              |  |  |
| 305 -> 316        | 0.31246   |           |           |          |              |  |  |
| 306 -> 316        | 0.32152   |           |           |          |              |  |  |
| 307 -> 316        | -0.20993  |           |           |          |              |  |  |
| 308 -> 316        | -0.18832  |           |           |          |              |  |  |
| 309 -> 318        | -0.11424  |           |           |          |              |  |  |
| 310 -> 319        | 0.13763   |           |           |          |              |  |  |
| 313 -> 325        | 0.10092   |           |           |          |              |  |  |
| 313 -> 326        | 0.11139   |           |           |          |              |  |  |
| 314 -> 330        | 0.10218   |           |           |          |              |  |  |
|                   |           |           |           |          |              |  |  |
| Excited State 55: | Singlet-A | 5.3307 eV | 232.59 nm | f=0.2639 | <S**2>=0.000 |  |  |
| 309 -> 318        | 0.53599   |           |           |          |              |  |  |
| 311 -> 321        | 0.13924   |           |           |          |              |  |  |

|                   |           |           |           |          |              |  |  |  |  |
|-------------------|-----------|-----------|-----------|----------|--------------|--|--|--|--|
| 312 -> 321        | 0.13620   |           |           |          |              |  |  |  |  |
| 313 -> 325        | -0.10421  |           |           |          |              |  |  |  |  |
| 314 -> 331        | 0.16499   |           |           |          |              |  |  |  |  |
| 314 -> 336        | 0.16057   |           |           |          |              |  |  |  |  |
| Excited State 56: | Singlet-A | 5.3403 eV | 232.17 nm | f=0.0285 | <S**2>=0.000 |  |  |  |  |
| 309 -> 318        | 0.10568   |           |           |          |              |  |  |  |  |
| 312 -> 321        | -0.20108  |           |           |          |              |  |  |  |  |
| 314 -> 330        | 0.11364   |           |           |          |              |  |  |  |  |
| 314 -> 331        | -0.41053  |           |           |          |              |  |  |  |  |
| 314 -> 332        | 0.41162   |           |           |          |              |  |  |  |  |
| 314 -> 333        | -0.13678  |           |           |          |              |  |  |  |  |
| 314 -> 335        | 0.11137   |           |           |          |              |  |  |  |  |
| Excited State 57: | Singlet-A | 5.3474 eV | 231.86 nm | f=0.0398 | <S**2>=0.000 |  |  |  |  |
| 302 -> 315        | 0.14104   |           |           |          |              |  |  |  |  |
| 305 -> 316        | -0.13921  |           |           |          |              |  |  |  |  |
| 306 -> 316        | 0.11468   |           |           |          |              |  |  |  |  |
| 310 -> 319        | -0.12488  |           |           |          |              |  |  |  |  |
| 312 -> 321        | 0.38881   |           |           |          |              |  |  |  |  |
| 312 -> 322        | -0.21160  |           |           |          |              |  |  |  |  |
| 313 -> 323        | 0.14158   |           |           |          |              |  |  |  |  |
| 314 -> 330        | 0.11952   |           |           |          |              |  |  |  |  |
| 314 -> 332        | 0.11774   |           |           |          |              |  |  |  |  |
| 314 -> 333        | -0.19001  |           |           |          |              |  |  |  |  |
| 314 -> 335        | 0.11494   |           |           |          |              |  |  |  |  |
| 314 -> 336        | 0.19398   |           |           |          |              |  |  |  |  |
| Excited State 58: | Singlet-A | 5.3640 eV | 231.14 nm | f=0.0192 | <S**2>=0.000 |  |  |  |  |
| 312 -> 321        | -0.19528  |           |           |          |              |  |  |  |  |
| 313 -> 326        | -0.11780  |           |           |          |              |  |  |  |  |
| 314 -> 330        | 0.23753   |           |           |          |              |  |  |  |  |
| 314 -> 331        | 0.33661   |           |           |          |              |  |  |  |  |
| 314 -> 333        | -0.25286  |           |           |          |              |  |  |  |  |
| 314 -> 334        | -0.30033  |           |           |          |              |  |  |  |  |
| 314 -> 335        | 0.16779   |           |           |          |              |  |  |  |  |
| 314 -> 336        | 0.16047   |           |           |          |              |  |  |  |  |
| Excited State 59: | Singlet-A | 5.3754 eV | 230.65 nm | f=0.0098 | <S**2>=0.000 |  |  |  |  |
| 302 -> 315        | 0.55799   |           |           |          |              |  |  |  |  |
| 305 -> 316        | -0.21635  |           |           |          |              |  |  |  |  |
| 306 -> 316        | 0.12014   |           |           |          |              |  |  |  |  |
| 312 -> 321        | -0.10156  |           |           |          |              |  |  |  |  |
| 312 -> 322        | 0.19317   |           |           |          |              |  |  |  |  |
| Excited State 60: | Singlet-A | 5.3779 eV | 230.54 nm | f=0.0038 | <S**2>=0.000 |  |  |  |  |
| 302 -> 315        | 0.28799   |           |           |          |              |  |  |  |  |
| 305 -> 316        | 0.43329   |           |           |          |              |  |  |  |  |
| 306 -> 316        | -0.39070  |           |           |          |              |  |  |  |  |
| 312 -> 321        | 0.12511   |           |           |          |              |  |  |  |  |
| Excited State 61: | Singlet-A | 5.3827 eV | 230.34 nm | f=0.0038 | <S**2>=0.000 |  |  |  |  |
| 313 -> 325        | 0.18913   |           |           |          |              |  |  |  |  |
| 314 -> 329        | -0.13300  |           |           |          |              |  |  |  |  |
| 314 -> 331        | 0.26907   |           |           |          |              |  |  |  |  |
| 314 -> 332        | 0.32590   |           |           |          |              |  |  |  |  |
| 314 -> 333        | 0.22882   |           |           |          |              |  |  |  |  |
| 314 -> 334        | 0.29789   |           |           |          |              |  |  |  |  |
| 314 -> 335        | -0.13676  |           |           |          |              |  |  |  |  |
| Excited State 62: | Singlet-A | 5.3876 eV | 230.13 nm | f=0.0256 | <S**2>=0.000 |  |  |  |  |
| 306 -> 316        | -0.10019  |           |           |          |              |  |  |  |  |
| 312 -> 321        | -0.11372  |           |           |          |              |  |  |  |  |

|                   |           |           |           |          |              |  |  |
|-------------------|-----------|-----------|-----------|----------|--------------|--|--|
| 313 -> 325        | 0.10034   |           |           |          |              |  |  |
| 314 -> 332        | -0.26238  |           |           |          |              |  |  |
| 314 -> 333        | -0.32405  |           |           |          |              |  |  |
| 314 -> 334        | 0.39280   |           |           |          |              |  |  |
| 314 -> 336        | 0.20403   |           |           |          |              |  |  |
| Excited State 63: | Singlet-A | 5.3997 eV | 229.61 nm | f=0.0164 | <S**2>=0.000 |  |  |
| 300 -> 315        | 0.16116   |           |           |          |              |  |  |
| 302 -> 315        | -0.14900  |           |           |          |              |  |  |
| 304 -> 316        | 0.31266   |           |           |          |              |  |  |
| 306 -> 316        | -0.13463  |           |           |          |              |  |  |
| 311 -> 321        | -0.11523  |           |           |          |              |  |  |
| 311 -> 322        | -0.13009  |           |           |          |              |  |  |
| 312 -> 322        | 0.43082   |           |           |          |              |  |  |
| 313 -> 323        | 0.12968   |           |           |          |              |  |  |
| Excited State 64: | Singlet-A | 5.4092 eV | 229.21 nm | f=0.0250 | <S**2>=0.000 |  |  |
| 300 -> 315        | -0.22081  |           |           |          |              |  |  |
| 304 -> 316        | 0.49694   |           |           |          |              |  |  |
| 305 -> 316        | -0.10411  |           |           |          |              |  |  |
| 306 -> 316        | -0.18059  |           |           |          |              |  |  |
| 309 -> 318        | 0.10547   |           |           |          |              |  |  |
| 312 -> 321        | -0.15117  |           |           |          |              |  |  |
| 312 -> 322        | -0.24846  |           |           |          |              |  |  |
| 313 -> 325        | 0.11259   |           |           |          |              |  |  |

JOB name: na92CTD2

Method/Basis: TD-B3LYP-D3/6-311G(d) [hexane]//B3PW91-D3/6-31G(d)

**Table S4.** Transition Energy, Wavelength, and Oscillator Strengths of the Electronic Transition of **8<sub>opt</sub>**

|                  |           |           |           |          |              |  |  |
|------------------|-----------|-----------|-----------|----------|--------------|--|--|
| Excited State 1: | Singlet-A | 2.4354 eV | 509.08 nm | f=0.0918 | <S**2>=0.000 |  |  |
| 314 -> 315       | 0.63974   |           |           |          |              |  |  |
| 314 -> 316       | 0.22220   |           |           |          |              |  |  |
| Excited State 2: | Singlet-A | 2.5068 eV | 494.59 nm | f=0.0486 | <S**2>=0.000 |  |  |
| 313 -> 315       | 0.60992   |           |           |          |              |  |  |
| 313 -> 316       | -0.29928  |           |           |          |              |  |  |
| 314 -> 315       | -0.11794  |           |           |          |              |  |  |
| Excited State 3: | Singlet-A | 2.9340 eV | 422.58 nm | f=1.0708 | <S**2>=0.000 |  |  |
| 313 -> 315       | 0.21618   |           |           |          |              |  |  |
| 313 -> 316       | 0.46108   |           |           |          |              |  |  |
| 314 -> 315       | 0.18552   |           |           |          |              |  |  |
| 314 -> 316       | -0.43639  |           |           |          |              |  |  |
| Excited State 4: | Singlet-A | 2.9690 eV | 417.60 nm | f=0.0076 | <S**2>=0.000 |  |  |
| 313 -> 315       | 0.23378   |           |           |          |              |  |  |
| 313 -> 316       | 0.40347   |           |           |          |              |  |  |
| 314 -> 315       | -0.14904  |           |           |          |              |  |  |
| 314 -> 316       | 0.47970   |           |           |          |              |  |  |
| Excited State 5: | Singlet-A | 3.1341 eV | 395.60 nm | f=0.0406 | <S**2>=0.000 |  |  |
| 314 -> 317       | 0.69202   |           |           |          |              |  |  |
| Excited State 6: | Singlet-A | 3.1685 eV | 391.31 nm | f=0.0524 | <S**2>=0.000 |  |  |
| 313 -> 317       | 0.69284   |           |           |          |              |  |  |
| Excited State 7: | Singlet-A | 3.4225 eV | 362.26 nm | f=0.0140 | <S**2>=0.000 |  |  |
| 312 -> 315       | -0.12237  |           |           |          |              |  |  |
| 313 -> 319       | 0.11237   |           |           |          |              |  |  |

|                   |           |           |           |          |              |  |  |
|-------------------|-----------|-----------|-----------|----------|--------------|--|--|
| 314 -> 316        | 0.10315   |           |           |          |              |  |  |
| 314 -> 318        | 0.62918   |           |           |          |              |  |  |
| 314 -> 319        | 0.14615   |           |           |          |              |  |  |
| 314 -> 321        | 0.12558   |           |           |          |              |  |  |
| Excited State 8:  | Singlet-A | 3.4598 eV | 358.36 nm | f=0.0055 | <S**2>=0.000 |  |  |
| 312 -> 315        | 0.69006   |           |           |          |              |  |  |
| Excited State 9:  | Singlet-A | 3.5404 eV | 350.20 nm | f=0.0171 | <S**2>=0.000 |  |  |
| 313 -> 316        | 0.10302   |           |           |          |              |  |  |
| 313 -> 318        | -0.18392  |           |           |          |              |  |  |
| 313 -> 319        | 0.61809   |           |           |          |              |  |  |
| 313 -> 321        | -0.13668  |           |           |          |              |  |  |
| 314 -> 318        | -0.16163  |           |           |          |              |  |  |
| Excited State 10: | Singlet-A | 3.6199 eV | 342.50 nm | f=0.0023 | <S**2>=0.000 |  |  |
| 313 -> 318        | 0.58326   |           |           |          |              |  |  |
| 313 -> 321        | -0.17494  |           |           |          |              |  |  |
| 314 -> 319        | 0.29056   |           |           |          |              |  |  |
| Excited State 11: | Singlet-A | 3.6405 eV | 340.57 nm | f=0.0010 | <S**2>=0.000 |  |  |
| 313 -> 318        | -0.27946  |           |           |          |              |  |  |
| 313 -> 319        | -0.13460  |           |           |          |              |  |  |
| 314 -> 318        | -0.17510  |           |           |          |              |  |  |
| 314 -> 319        | 0.54973   |           |           |          |              |  |  |
| 314 -> 320        | 0.12042   |           |           |          |              |  |  |
| 314 -> 321        | 0.17134   |           |           |          |              |  |  |
| Excited State 12: | Singlet-A | 3.7621 eV | 329.56 nm | f=0.0012 | <S**2>=0.000 |  |  |
| 312 -> 316        | 0.69469   |           |           |          |              |  |  |
| Excited State 13: | Singlet-A | 3.9025 eV | 317.70 nm | f=0.0009 | <S**2>=0.000 |  |  |
| 314 -> 320        | 0.58295   |           |           |          |              |  |  |
| 314 -> 321        | -0.36570  |           |           |          |              |  |  |
| Excited State 14: | Singlet-A | 3.9367 eV | 314.95 nm | f=0.0008 | <S**2>=0.000 |  |  |
| 313 -> 320        | 0.59741   |           |           |          |              |  |  |
| 313 -> 321        | -0.33799  |           |           |          |              |  |  |
| Excited State 15: | Singlet-A | 4.0412 eV | 306.80 nm | f=0.0186 | <S**2>=0.000 |  |  |
| 311 -> 315        | 0.68098   |           |           |          |              |  |  |
| Excited State 16: | Singlet-A | 4.0629 eV | 305.16 nm | f=0.0073 | <S**2>=0.000 |  |  |
| 310 -> 315        | 0.22208   |           |           |          |              |  |  |
| 312 -> 317        | -0.10934  |           |           |          |              |  |  |
| 313 -> 319        | -0.10782  |           |           |          |              |  |  |
| 313 -> 320        | -0.15835  |           |           |          |              |  |  |
| 313 -> 321        | -0.31071  |           |           |          |              |  |  |
| 314 -> 319        | -0.20732  |           |           |          |              |  |  |
| 314 -> 320        | 0.23252   |           |           |          |              |  |  |
| 314 -> 321        | 0.39639   |           |           |          |              |  |  |
| Excited State 17: | Singlet-A | 4.0910 eV | 303.07 nm | f=0.0102 | <S**2>=0.000 |  |  |
| 309 -> 315        | -0.11042  |           |           |          |              |  |  |
| 313 -> 318        | 0.13515   |           |           |          |              |  |  |
| 313 -> 319        | 0.18361   |           |           |          |              |  |  |
| 313 -> 320        | 0.22165   |           |           |          |              |  |  |
| 313 -> 321        | 0.42654   |           |           |          |              |  |  |
| 314 -> 319        | -0.12362  |           |           |          |              |  |  |
| 314 -> 320        | 0.19926   |           |           |          |              |  |  |
| 314 -> 321        | 0.33072   |           |           |          |              |  |  |
| Excited State 18: | Singlet-A | 4.1789 eV | 296.69 nm | f=0.0045 | <S**2>=0.000 |  |  |
| 309 -> 316        | -0.12177  |           |           |          |              |  |  |
| 310 -> 315        | 0.44697   |           |           |          |              |  |  |
| 311 -> 316        | 0.14444   |           |           |          |              |  |  |
| 312 -> 317        | -0.39980  |           |           |          |              |  |  |
| 313 -> 320        | 0.14348   |           |           |          |              |  |  |
| 313 -> 321        | 0.15351   |           |           |          |              |  |  |
| 314 -> 320        | -0.11814  |           |           |          |              |  |  |

|                   |           |           |           |          |              |  |  |  |  |
|-------------------|-----------|-----------|-----------|----------|--------------|--|--|--|--|
| 314 -> 321        | -0.13145  |           |           |          |              |  |  |  |  |
| Excited State 19: | Singlet-A | 4.2722 eV | 290.21 nm | f=0.0199 | <S**2>=0.000 |  |  |  |  |
| 309 -> 315        | -0.35547  |           |           |          |              |  |  |  |  |
| 310 -> 315        | 0.12350   |           |           |          |              |  |  |  |  |
| 310 -> 316        | 0.19470   |           |           |          |              |  |  |  |  |
| 311 -> 316        | -0.12138  |           |           |          |              |  |  |  |  |
| 312 -> 317        | 0.18777   |           |           |          |              |  |  |  |  |
| 314 -> 322        | 0.48404   |           |           |          |              |  |  |  |  |
| 314 -> 324        | 0.11704   |           |           |          |              |  |  |  |  |
| Excited State 20: | Singlet-A | 4.2805 eV | 289.65 nm | f=0.0416 | <S**2>=0.000 |  |  |  |  |
| 309 -> 315        | 0.42065   |           |           |          |              |  |  |  |  |
| 310 -> 316        | -0.21273  |           |           |          |              |  |  |  |  |
| 311 -> 316        | 0.13634   |           |           |          |              |  |  |  |  |
| 312 -> 317        | -0.10860  |           |           |          |              |  |  |  |  |
| 314 -> 322        | 0.45909   |           |           |          |              |  |  |  |  |
| 314 -> 324        | 0.11596   |           |           |          |              |  |  |  |  |
| Excited State 21: | Singlet-A | 4.3014 eV | 288.24 nm | f=0.0014 | <S**2>=0.000 |  |  |  |  |
| 310 -> 315        | -0.18240  |           |           |          |              |  |  |  |  |
| 312 -> 317        | -0.16861  |           |           |          |              |  |  |  |  |
| 313 -> 322        | 0.61907   |           |           |          |              |  |  |  |  |
| 313 -> 324        | 0.10416   |           |           |          |              |  |  |  |  |
| 313 -> 325        | 0.10575   |           |           |          |              |  |  |  |  |
| Excited State 22: | Singlet-A | 4.3192 eV | 287.06 nm | f=0.0118 | <S**2>=0.000 |  |  |  |  |
| 309 -> 315        | -0.24550  |           |           |          |              |  |  |  |  |
| 310 -> 315        | -0.35869  |           |           |          |              |  |  |  |  |
| 310 -> 316        | 0.12865   |           |           |          |              |  |  |  |  |
| 311 -> 316        | 0.35924   |           |           |          |              |  |  |  |  |
| 312 -> 317        | -0.27753  |           |           |          |              |  |  |  |  |
| 313 -> 322        | -0.24086  |           |           |          |              |  |  |  |  |
| Excited State 23: | Singlet-A | 4.3615 eV | 284.27 nm | f=0.0015 | <S**2>=0.000 |  |  |  |  |
| 310 -> 315        | 0.15541   |           |           |          |              |  |  |  |  |
| 311 -> 316        | 0.53815   |           |           |          |              |  |  |  |  |
| 312 -> 317        | 0.38617   |           |           |          |              |  |  |  |  |
| Excited State 24: | Singlet-A | 4.5389 eV | 273.16 nm | f=0.0035 | <S**2>=0.000 |  |  |  |  |
| 314 -> 323        | 0.44280   |           |           |          |              |  |  |  |  |
| 314 -> 325        | 0.51995   |           |           |          |              |  |  |  |  |
| Excited State 25: | Singlet-A | 4.5577 eV | 272.03 nm | f=0.0334 | <S**2>=0.000 |  |  |  |  |
| 309 -> 315        | 0.12339   |           |           |          |              |  |  |  |  |
| 310 -> 316        | 0.20773   |           |           |          |              |  |  |  |  |
| 313 -> 323        | -0.21142  |           |           |          |              |  |  |  |  |
| 313 -> 324        | 0.12429   |           |           |          |              |  |  |  |  |
| 313 -> 325        | -0.11713  |           |           |          |              |  |  |  |  |
| 314 -> 323        | 0.28646   |           |           |          |              |  |  |  |  |
| 314 -> 324        | 0.38643   |           |           |          |              |  |  |  |  |
| 314 -> 325        | -0.29791  |           |           |          |              |  |  |  |  |
| Excited State 26: | Singlet-A | 4.5664 eV | 271.51 nm | f=0.0196 | <S**2>=0.000 |  |  |  |  |
| 308 -> 315        | -0.10182  |           |           |          |              |  |  |  |  |
| 310 -> 316        | 0.12549   |           |           |          |              |  |  |  |  |
| 313 -> 323        | 0.34024   |           |           |          |              |  |  |  |  |
| 313 -> 324        | -0.30301  |           |           |          |              |  |  |  |  |
| 313 -> 325        | 0.43020   |           |           |          |              |  |  |  |  |
| 314 -> 323        | 0.16000   |           |           |          |              |  |  |  |  |
| 314 -> 324        | 0.11336   |           |           |          |              |  |  |  |  |
| Excited State 27: | Singlet-A | 4.5825 eV | 270.56 nm | f=0.0189 | <S**2>=0.000 |  |  |  |  |
| 308 -> 315        | -0.20781  |           |           |          |              |  |  |  |  |
| 309 -> 315        | 0.24058   |           |           |          |              |  |  |  |  |
| 309 -> 316        | 0.11506   |           |           |          |              |  |  |  |  |
| 310 -> 316        | 0.41417   |           |           |          |              |  |  |  |  |
| 312 -> 318        | 0.23099   |           |           |          |              |  |  |  |  |
| 313 -> 323        | -0.11551  |           |           |          |              |  |  |  |  |
| 314 -> 323        | -0.17336  |           |           |          |              |  |  |  |  |

|                   |           |           |           |          |              |  |  |  |  |
|-------------------|-----------|-----------|-----------|----------|--------------|--|--|--|--|
| 314 -> 324        | -0.22372  |           |           |          |              |  |  |  |  |
| 314 -> 325        | 0.16893   |           |           |          |              |  |  |  |  |
| Excited State 28: | Singlet-A | 4.6104 eV | 268.92 nm | f=0.0237 | <S**2>=0.000 |  |  |  |  |
| 312 -> 318        | -0.29047  |           |           |          |              |  |  |  |  |
| 313 -> 323        | -0.36212  |           |           |          |              |  |  |  |  |
| 313 -> 324        | 0.18349   |           |           |          |              |  |  |  |  |
| 313 -> 325        | 0.46610   |           |           |          |              |  |  |  |  |
| Excited State 29: | Singlet-A | 4.6148 eV | 268.66 nm | f=0.0200 | <S**2>=0.000 |  |  |  |  |
| 308 -> 315        | 0.20326   |           |           |          |              |  |  |  |  |
| 309 -> 315        | -0.10018  |           |           |          |              |  |  |  |  |
| 309 -> 316        | -0.12302  |           |           |          |              |  |  |  |  |
| 310 -> 316        | -0.19744  |           |           |          |              |  |  |  |  |
| 312 -> 318        | 0.54509   |           |           |          |              |  |  |  |  |
| 312 -> 319        | -0.13348  |           |           |          |              |  |  |  |  |
| 313 -> 323        | -0.15204  |           |           |          |              |  |  |  |  |
| 313 -> 325        | 0.18104   |           |           |          |              |  |  |  |  |
| Excited State 30: | Singlet-A | 4.6361 eV | 267.43 nm | f=0.0048 | <S**2>=0.000 |  |  |  |  |
| 307 -> 315        | 0.10850   |           |           |          |              |  |  |  |  |
| 308 -> 315        | 0.10561   |           |           |          |              |  |  |  |  |
| 309 -> 316        | 0.63069   |           |           |          |              |  |  |  |  |
| 310 -> 315        | 0.14684   |           |           |          |              |  |  |  |  |
| 310 -> 316        | -0.13566  |           |           |          |              |  |  |  |  |
| 313 -> 325        | 0.10460   |           |           |          |              |  |  |  |  |
| Excited State 31: | Singlet-A | 4.6608 eV | 266.02 nm | f=0.0054 | <S**2>=0.000 |  |  |  |  |
| 314 -> 323        | -0.15199  |           |           |          |              |  |  |  |  |
| 314 -> 324        | 0.18767   |           |           |          |              |  |  |  |  |
| 314 -> 325        | 0.13089   |           |           |          |              |  |  |  |  |
| 314 -> 326        | 0.61350   |           |           |          |              |  |  |  |  |
| Excited State 32: | Singlet-A | 4.6892 eV | 264.40 nm | f=0.0075 | <S**2>=0.000 |  |  |  |  |
| 308 -> 315        | -0.21055  |           |           |          |              |  |  |  |  |
| 312 -> 319        | 0.28826   |           |           |          |              |  |  |  |  |
| 313 -> 323        | 0.11779   |           |           |          |              |  |  |  |  |
| 313 -> 324        | 0.18900   |           |           |          |              |  |  |  |  |
| 313 -> 326        | 0.52590   |           |           |          |              |  |  |  |  |
| Excited State 33: | Singlet-A | 4.6982 eV | 263.90 nm | f=0.0007 | <S**2>=0.000 |  |  |  |  |
| 308 -> 315        | -0.13902  |           |           |          |              |  |  |  |  |
| 312 -> 318        | 0.16867   |           |           |          |              |  |  |  |  |
| 312 -> 319        | 0.54959   |           |           |          |              |  |  |  |  |
| 313 -> 324        | -0.12292  |           |           |          |              |  |  |  |  |
| 313 -> 326        | -0.31047  |           |           |          |              |  |  |  |  |
| Excited State 34: | Singlet-A | 4.7200 eV | 262.68 nm | f=0.0453 | <S**2>=0.000 |  |  |  |  |
| 308 -> 315        | 0.51681   |           |           |          |              |  |  |  |  |
| 310 -> 316        | 0.27471   |           |           |          |              |  |  |  |  |
| 312 -> 319        | 0.26124   |           |           |          |              |  |  |  |  |
| Excited State 35: | Singlet-A | 4.7864 eV | 259.03 nm | f=0.0005 | <S**2>=0.000 |  |  |  |  |
| 307 -> 315        | 0.58221   |           |           |          |              |  |  |  |  |
| 313 -> 324        | 0.12515   |           |           |          |              |  |  |  |  |
| 313 -> 327        | -0.10989  |           |           |          |              |  |  |  |  |
| 314 -> 323        | 0.13050   |           |           |          |              |  |  |  |  |
| 314 -> 324        | -0.15487  |           |           |          |              |  |  |  |  |
| 314 -> 325        | -0.10127  |           |           |          |              |  |  |  |  |
| 314 -> 327        | -0.14308  |           |           |          |              |  |  |  |  |
| Excited State 36: | Singlet-A | 4.8054 eV | 258.01 nm | f=0.0045 | <S**2>=0.000 |  |  |  |  |
| 307 -> 315        | 0.24295   |           |           |          |              |  |  |  |  |
| 314 -> 322        | -0.11779  |           |           |          |              |  |  |  |  |
| 314 -> 323        | -0.29172  |           |           |          |              |  |  |  |  |
| 314 -> 324        | 0.39070   |           |           |          |              |  |  |  |  |
| 314 -> 325        | 0.23288   |           |           |          |              |  |  |  |  |
| 314 -> 326        | -0.27731  |           |           |          |              |  |  |  |  |
| 314 -> 328        | -0.11513  |           |           |          |              |  |  |  |  |



|               |            |           |           |           |          |              |
|---------------|------------|-----------|-----------|-----------|----------|--------------|
| Excited State | 37:        | Singlet-A | 4.8328 eV | 256.55 nm | f=0.0041 | <S**2>=0.000 |
|               | 307 -> 315 | -0.14516  |           |           |          |              |
|               | 311 -> 317 | -0.10964  |           |           |          |              |
|               | 313 -> 322 | -0.13618  |           |           |          |              |
|               | 313 -> 323 | 0.30636   |           |           |          |              |
|               | 313 -> 324 | 0.47043   |           |           |          |              |
|               | 313 -> 326 | -0.29353  |           |           |          |              |
|               | 313 -> 328 | 0.11358   |           |           |          |              |
| Excited State | 38:        | Singlet-A | 4.8572 eV | 255.26 nm | f=0.0042 | <S**2>=0.000 |
|               | 311 -> 317 | 0.44947   |           |           |          |              |
|               | 314 -> 327 | 0.48407   |           |           |          |              |
| Excited State | 39:        | Singlet-A | 4.8682 eV | 254.68 nm | f=0.0033 | <S**2>=0.000 |
|               | 307 -> 315 | -0.13257  |           |           |          |              |
|               | 308 -> 316 | 0.13715   |           |           |          |              |
|               | 311 -> 317 | 0.46777   |           |           |          |              |
|               | 313 -> 327 | 0.13314   |           |           |          |              |
|               | 314 -> 327 | -0.43030  |           |           |          |              |
| Excited State | 40:        | Singlet-A | 4.8949 eV | 253.30 nm | f=0.0099 | <S**2>=0.000 |
|               | 307 -> 315 | 0.10723   |           |           |          |              |
|               | 308 -> 316 | -0.11660  |           |           |          |              |
|               | 311 -> 317 | -0.11540  |           |           |          |              |
|               | 313 -> 327 | 0.63209   |           |           |          |              |
|               | 313 -> 331 | 0.13253   |           |           |          |              |
| Excited State | 41:        | Singlet-A | 4.9127 eV | 252.37 nm | f=0.0019 | <S**2>=0.000 |
|               | 314 -> 328 | 0.26696   |           |           |          |              |
|               | 314 -> 329 | -0.37619  |           |           |          |              |
|               | 314 -> 330 | 0.41096   |           |           |          |              |
|               | 314 -> 331 | -0.24263  |           |           |          |              |
|               | 314 -> 332 | 0.15656   |           |           |          |              |
|               | 314 -> 333 | 0.11752   |           |           |          |              |
| Excited State | 42:        | Singlet-A | 4.9442 eV | 250.77 nm | f=0.0140 | <S**2>=0.000 |
|               | 307 -> 316 | -0.21100  |           |           |          |              |
|               | 310 -> 317 | -0.19409  |           |           |          |              |
|               | 312 -> 320 | 0.46686   |           |           |          |              |
|               | 312 -> 321 | -0.29813  |           |           |          |              |
|               | 313 -> 328 | 0.10859   |           |           |          |              |
|               | 313 -> 329 | 0.17178   |           |           |          |              |
|               | 313 -> 330 | -0.12472  |           |           |          |              |
|               | 313 -> 331 | 0.10030   |           |           |          |              |
| Excited State | 43:        | Singlet-A | 4.9455 eV | 250.70 nm | f=0.0048 | <S**2>=0.000 |
|               | 312 -> 320 | -0.25172  |           |           |          |              |
|               | 313 -> 328 | 0.19200   |           |           |          |              |
|               | 313 -> 329 | 0.45477   |           |           |          |              |
|               | 313 -> 330 | -0.29137  |           |           |          |              |
|               | 313 -> 331 | 0.20888   |           |           |          |              |
|               | 313 -> 332 | -0.11016  |           |           |          |              |
| Excited State | 44:        | Singlet-A | 4.9688 eV | 249.52 nm | f=0.0304 | <S**2>=0.000 |
|               | 310 -> 317 | 0.62778   |           |           |          |              |
|               | 312 -> 320 | 0.20003   |           |           |          |              |
| Excited State | 45:        | Singlet-A | 4.9898 eV | 248.47 nm | f=0.0067 | <S**2>=0.000 |
|               | 305 -> 315 | -0.30797  |           |           |          |              |
|               | 305 -> 316 | -0.13392  |           |           |          |              |
|               | 306 -> 315 | 0.31258   |           |           |          |              |
|               | 308 -> 316 | 0.46195   |           |           |          |              |
| Excited State | 46:        | Singlet-A | 5.0175 eV | 247.11 nm | f=0.0185 | <S**2>=0.000 |
|               | 305 -> 315 | 0.49464   |           |           |          |              |
|               | 305 -> 316 | 0.14272   |           |           |          |              |
|               | 306 -> 316 | -0.14924  |           |           |          |              |
|               | 308 -> 316 | 0.38610   |           |           |          |              |
| Excited State | 47:        | Singlet-A | 5.0390 eV | 246.05 nm | f=0.0011 | <S**2>=0.000 |

|                   |           |           |           |          |              |  |  |  |  |
|-------------------|-----------|-----------|-----------|----------|--------------|--|--|--|--|
| 312 -> 320        | -0.13793  |           |           |          |              |  |  |  |  |
| 312 -> 321        | -0.21378  |           |           |          |              |  |  |  |  |
| 314 -> 324        | 0.12646   |           |           |          |              |  |  |  |  |
| 314 -> 328        | 0.37500   |           |           |          |              |  |  |  |  |
| 314 -> 329        | 0.23491   |           |           |          |              |  |  |  |  |
| 314 -> 331        | 0.23261   |           |           |          |              |  |  |  |  |
| 314 -> 333        | 0.29357   |           |           |          |              |  |  |  |  |
| 314 -> 337        | 0.10246   |           |           |          |              |  |  |  |  |
| Excited State 48: | Singlet-A | 5.0534 eV | 245.35 nm | f=0.0116 | <S**2>=0.000 |  |  |  |  |
| 305 -> 315        | 0.22004   |           |           |          |              |  |  |  |  |
| 305 -> 316        | -0.14281  |           |           |          |              |  |  |  |  |
| 306 -> 315        | 0.49591   |           |           |          |              |  |  |  |  |
| 306 -> 316        | -0.22123  |           |           |          |              |  |  |  |  |
| 307 -> 316        | -0.10957  |           |           |          |              |  |  |  |  |
| 308 -> 316        | -0.17439  |           |           |          |              |  |  |  |  |
| 312 -> 320        | -0.10908  |           |           |          |              |  |  |  |  |
| 312 -> 321        | -0.19523  |           |           |          |              |  |  |  |  |
| 313 -> 328        | -0.11258  |           |           |          |              |  |  |  |  |
| Excited State 49: | Singlet-A | 5.0555 eV | 245.25 nm | f=0.0136 | <S**2>=0.000 |  |  |  |  |
| 306 -> 315        | 0.19077   |           |           |          |              |  |  |  |  |
| 312 -> 320        | 0.27958   |           |           |          |              |  |  |  |  |
| 312 -> 321        | 0.48323   |           |           |          |              |  |  |  |  |
| 313 -> 328        | 0.10641   |           |           |          |              |  |  |  |  |
| 314 -> 328        | 0.12694   |           |           |          |              |  |  |  |  |
| 314 -> 329        | 0.11923   |           |           |          |              |  |  |  |  |
| 314 -> 331        | 0.13094   |           |           |          |              |  |  |  |  |
| 314 -> 333        | 0.12629   |           |           |          |              |  |  |  |  |
| Excited State 50: | Singlet-A | 5.0666 eV | 244.71 nm | f=0.0051 | <S**2>=0.000 |  |  |  |  |
| 314 -> 328        | -0.31430  |           |           |          |              |  |  |  |  |
| 314 -> 329        | 0.12320   |           |           |          |              |  |  |  |  |
| 314 -> 330        | 0.38362   |           |           |          |              |  |  |  |  |
| 314 -> 331        | 0.30483   |           |           |          |              |  |  |  |  |
| 314 -> 332        | 0.29867   |           |           |          |              |  |  |  |  |
| 314 -> 334        | 0.13206   |           |           |          |              |  |  |  |  |
| Excited State 51: | Singlet-A | 5.0762 eV | 244.25 nm | f=0.0048 | <S**2>=0.000 |  |  |  |  |
| 309 -> 317        | -0.20631  |           |           |          |              |  |  |  |  |
| 312 -> 321        | -0.16759  |           |           |          |              |  |  |  |  |
| 313 -> 324        | -0.10205  |           |           |          |              |  |  |  |  |
| 313 -> 328        | 0.41979   |           |           |          |              |  |  |  |  |
| 313 -> 330        | 0.20435   |           |           |          |              |  |  |  |  |
| 313 -> 331        | -0.14290  |           |           |          |              |  |  |  |  |
| 313 -> 333        | 0.28553   |           |           |          |              |  |  |  |  |
| Excited State 52: | Singlet-A | 5.0883 eV | 243.67 nm | f=0.0062 | <S**2>=0.000 |  |  |  |  |
| 303 -> 315        | -0.19235  |           |           |          |              |  |  |  |  |
| 307 -> 316        | 0.57924   |           |           |          |              |  |  |  |  |
| 311 -> 318        | -0.11333  |           |           |          |              |  |  |  |  |
| 312 -> 321        | -0.13609  |           |           |          |              |  |  |  |  |
| 312 -> 322        | 0.15758   |           |           |          |              |  |  |  |  |
| Excited State 53: | Singlet-A | 5.0983 eV | 243.19 nm | f=0.0040 | <S**2>=0.000 |  |  |  |  |
| 303 -> 315        | 0.14450   |           |           |          |              |  |  |  |  |
| 313 -> 328        | -0.24361  |           |           |          |              |  |  |  |  |
| 313 -> 329        | 0.36020   |           |           |          |              |  |  |  |  |
| 313 -> 330        | 0.24026   |           |           |          |              |  |  |  |  |
| 313 -> 331        | -0.32114  |           |           |          |              |  |  |  |  |
| 313 -> 332        | -0.26954  |           |           |          |              |  |  |  |  |
| 313 -> 334        | 0.12911   |           |           |          |              |  |  |  |  |
| Excited State 54: | Singlet-A | 5.1086 eV | 242.70 nm | f=0.0381 | <S**2>=0.000 |  |  |  |  |
| 303 -> 315        | 0.17634   |           |           |          |              |  |  |  |  |
| 304 -> 315        | 0.11428   |           |           |          |              |  |  |  |  |
| 308 -> 316        | -0.11449  |           |           |          |              |  |  |  |  |
| 308 -> 317        | 0.11001   |           |           |          |              |  |  |  |  |
| 309 -> 317        | 0.56612   |           |           |          |              |  |  |  |  |
| 311 -> 317        | 0.11926   |           |           |          |              |  |  |  |  |

|                   |           |           |           |          |              |  |  |  |  |
|-------------------|-----------|-----------|-----------|----------|--------------|--|--|--|--|
| 311 -> 319        | 0.10913   |           |           |          |              |  |  |  |  |
| 313 -> 328        | 0.11905   |           |           |          |              |  |  |  |  |
| Excited State 55: | Singlet-A | 5.1101 eV | 242.63 nm | f=0.0361 | <S**2>=0.000 |  |  |  |  |
| 303 -> 315        | 0.47496   |           |           |          |              |  |  |  |  |
| 303 -> 316        | 0.19782   |           |           |          |              |  |  |  |  |
| 304 -> 315        | 0.24536   |           |           |          |              |  |  |  |  |
| 307 -> 316        | 0.14575   |           |           |          |              |  |  |  |  |
| 309 -> 317        | -0.16453  |           |           |          |              |  |  |  |  |
| 311 -> 318        | -0.10504  |           |           |          |              |  |  |  |  |
| 313 -> 330        | -0.14145  |           |           |          |              |  |  |  |  |
| 313 -> 331        | 0.13986   |           |           |          |              |  |  |  |  |
| Excited State 56: | Singlet-A | 5.1375 eV | 241.33 nm | f=0.0057 | <S**2>=0.000 |  |  |  |  |
| 304 -> 315        | 0.17447   |           |           |          |              |  |  |  |  |
| 314 -> 328        | -0.27545  |           |           |          |              |  |  |  |  |
| 314 -> 329        | -0.24949  |           |           |          |              |  |  |  |  |
| 314 -> 330        | -0.17059  |           |           |          |              |  |  |  |  |
| 314 -> 333        | 0.49802   |           |           |          |              |  |  |  |  |
| Excited State 57: | Singlet-A | 5.1506 eV | 240.72 nm | f=0.0247 | <S**2>=0.000 |  |  |  |  |
| 303 -> 315        | -0.25610  |           |           |          |              |  |  |  |  |
| 303 -> 316        | 0.13696   |           |           |          |              |  |  |  |  |
| 304 -> 315        | 0.51275   |           |           |          |              |  |  |  |  |
| 304 -> 316        | -0.27232  |           |           |          |              |  |  |  |  |
| 314 -> 333        | -0.15586  |           |           |          |              |  |  |  |  |
| Excited State 58: | Singlet-A | 5.1737 eV | 239.64 nm | f=0.0027 | <S**2>=0.000 |  |  |  |  |
| 314 -> 328        | -0.10735  |           |           |          |              |  |  |  |  |
| 314 -> 329        | 0.28795   |           |           |          |              |  |  |  |  |
| 314 -> 331        | -0.35915  |           |           |          |              |  |  |  |  |
| 314 -> 332        | 0.37493   |           |           |          |              |  |  |  |  |
| 314 -> 334        | -0.33005  |           |           |          |              |  |  |  |  |
| Excited State 59: | Singlet-A | 5.1767 eV | 239.51 nm | f=0.0083 | <S**2>=0.000 |  |  |  |  |
| 313 -> 328        | -0.25728  |           |           |          |              |  |  |  |  |
| 313 -> 330        | -0.29087  |           |           |          |              |  |  |  |  |
| 313 -> 331        | -0.13048  |           |           |          |              |  |  |  |  |
| 313 -> 332        | 0.18628   |           |           |          |              |  |  |  |  |
| 313 -> 333        | 0.49084   |           |           |          |              |  |  |  |  |
| Excited State 60: | Singlet-A | 5.2099 eV | 237.98 nm | f=0.0021 | <S**2>=0.000 |  |  |  |  |
| 313 -> 328        | -0.16474  |           |           |          |              |  |  |  |  |
| 313 -> 330        | 0.23518   |           |           |          |              |  |  |  |  |
| 313 -> 331        | 0.35085   |           |           |          |              |  |  |  |  |
| 313 -> 332        | -0.30823  |           |           |          |              |  |  |  |  |
| 313 -> 333        | 0.23386   |           |           |          |              |  |  |  |  |
| 313 -> 334        | -0.33344  |           |           |          |              |  |  |  |  |
| Excited State 61: | Singlet-A | 5.2504 eV | 236.14 nm | f=0.0707 | <S**2>=0.000 |  |  |  |  |
| 300 -> 315        | -0.13889  |           |           |          |              |  |  |  |  |
| 302 -> 315        | -0.16461  |           |           |          |              |  |  |  |  |
| 309 -> 317        | -0.14149  |           |           |          |              |  |  |  |  |
| 311 -> 318        | 0.45407   |           |           |          |              |  |  |  |  |
| 311 -> 319        | 0.40055   |           |           |          |              |  |  |  |  |
| Excited State 62: | Singlet-A | 5.2698 eV | 235.27 nm | f=0.0042 | <S**2>=0.000 |  |  |  |  |
| 314 -> 326        | 0.12627   |           |           |          |              |  |  |  |  |
| 314 -> 328        | 0.13819   |           |           |          |              |  |  |  |  |
| 314 -> 329        | -0.28211  |           |           |          |              |  |  |  |  |
| 314 -> 330        | -0.29052  |           |           |          |              |  |  |  |  |
| 314 -> 331        | 0.24852   |           |           |          |              |  |  |  |  |
| 314 -> 332        | 0.39270   |           |           |          |              |  |  |  |  |
| 314 -> 333        | -0.21092  |           |           |          |              |  |  |  |  |
| 314 -> 334        | -0.10154  |           |           |          |              |  |  |  |  |
| Excited State 63: | Singlet-A | 5.3009 eV | 233.89 nm | f=0.0924 | <S**2>=0.000 |  |  |  |  |
| 310 -> 318        | -0.15212  |           |           |          |              |  |  |  |  |
| 310 -> 319        | -0.12227  |           |           |          |              |  |  |  |  |
| 311 -> 318        | -0.20757  |           |           |          |              |  |  |  |  |

|                   |                                                     |
|-------------------|-----------------------------------------------------|
| 311 -> 319        | 0.27835                                             |
| 312 -> 322        | -0.19872                                            |
| 313 -> 332        | -0.12519                                            |
| 314 -> 334        | -0.15124                                            |
| 314 -> 335        | 0.36206                                             |
| 314 -> 336        | 0.15508                                             |
| 314 -> 337        | 0.19533                                             |
| <hr/>             |                                                     |
| Excited State 64: | Singlet-A 5.3044 eV 233.74 nm f=0.0010 <S**2>=0.000 |
| 313 -> 326        | 0.12480                                             |
| 313 -> 328        | -0.14169                                            |
| 313 -> 329        | 0.23577                                             |
| 313 -> 330        | 0.29021                                             |
| 313 -> 331        | 0.23711                                             |
| 313 -> 332        | 0.42835                                             |
| 314 -> 335        | 0.11990                                             |

JOB name: na92DTD2

Method/Basis: TD-B3LYP-D3/6-311G(d) [hexane]//B3PW91-D3/6-31G(d)

**Table S5.** Transition Energy, Wavelength, and Oscillator Strengths of the Electronic Transition of **9<sub>opt</sub>**

|                  |           |           |           |          |              |
|------------------|-----------|-----------|-----------|----------|--------------|
| Excited State 1: | Singlet-A | 2.3626 eV | 524.78 nm | f=0.0437 | <S**2>=0.000 |
| 211 -> 212       | 0.70004   |           |           |          |              |
| Excited State 2: | Singlet-A | 2.4965 eV | 496.63 nm | f=0.0110 | <S**2>=0.000 |
| 208 -> 212       | -0.11064  |           |           |          |              |
| 210 -> 212       | 0.69028   |           |           |          |              |
| Excited State 3: | Singlet-A | 2.9717 eV | 417.21 nm | f=0.0005 | <S**2>=0.000 |
| 211 -> 213       | 0.70205   |           |           |          |              |
| Excited State 4: | Singlet-A | 3.1024 eV | 399.64 nm | f=0.0188 | <S**2>=0.000 |
| 209 -> 212       | 0.14123   |           |           |          |              |
| 210 -> 213       | 0.68574   |           |           |          |              |
| Excited State 5: | Singlet-A | 3.2431 eV | 382.30 nm | f=0.0009 | <S**2>=0.000 |
| 209 -> 212       | 0.68658   |           |           |          |              |
| 210 -> 213       | -0.14238  |           |           |          |              |
| Excited State 6: | Singlet-A | 3.5032 eV | 353.92 nm | f=0.0092 | <S**2>=0.000 |
| 211 -> 214       | 0.69361   |           |           |          |              |
| Excited State 7: | Singlet-A | 3.6080 eV | 343.63 nm | f=0.0168 | <S**2>=0.000 |
| 210 -> 214       | 0.68933   |           |           |          |              |
| Excited State 8: | Singlet-A | 3.8538 eV | 321.72 nm | f=0.0257 | <S**2>=0.000 |
| 208 -> 212       | 0.54869   |           |           |          |              |
| 209 -> 213       | 0.21538   |           |           |          |              |
| 210 -> 215       | -0.13387  |           |           |          |              |
| 210 -> 216       | 0.10272   |           |           |          |              |
| 210 -> 217       | 0.10049   |           |           |          |              |
| 211 -> 215       | -0.12850  |           |           |          |              |
| 211 -> 216       | -0.25330  |           |           |          |              |
| Excited State 9: | Singlet-A | 3.8856 eV | 319.08 nm | f=0.0082 | <S**2>=0.000 |
| 210 -> 215       | 0.59454   |           |           |          |              |
| 211 -> 215       | 0.20263   |           |           |          |              |
| 211 -> 216       | -0.27927  |           |           |          |              |

|                   |           |           |           |          |              |
|-------------------|-----------|-----------|-----------|----------|--------------|
| Excited State 10: | Singlet-A | 3.8958 eV | 318.25 nm | f=0.0039 | <S**2>=0.000 |
| 210 -> 215        | -0.23786  |           |           |          |              |
| 210 -> 216        | -0.10450  |           |           |          |              |
| 211 -> 215        | 0.63869   |           |           |          |              |
| Excited State 11: | Singlet-A | 3.9475 eV | 314.08 nm | f=0.0012 | <S**2>=0.000 |
| 207 -> 212        | 0.59795   |           |           |          |              |
| 209 -> 213        | 0.27645   |           |           |          |              |
| 211 -> 216        | 0.20321   |           |           |          |              |
| Excited State 12: | Singlet-A | 3.9827 eV | 311.30 nm | f=0.0042 | <S**2>=0.000 |
| 207 -> 212        | -0.33798  |           |           |          |              |
| 208 -> 212        | 0.16639   |           |           |          |              |
| 209 -> 213        | 0.29808   |           |           |          |              |
| 210 -> 215        | 0.21689   |           |           |          |              |
| 211 -> 216        | 0.45155   |           |           |          |              |
| Excited State 13: | Singlet-A | 4.0116 eV | 309.06 nm | f=0.0114 | <S**2>=0.000 |
| 208 -> 213        | 0.10051   |           |           |          |              |
| 209 -> 213        | -0.12488  |           |           |          |              |
| 210 -> 216        | 0.65201   |           |           |          |              |
| Excited State 14: | Singlet-A | 4.0836 eV | 303.62 nm | f=0.0091 | <S**2>=0.000 |
| 205 -> 212        | -0.12471  |           |           |          |              |
| 207 -> 212        | -0.11658  |           |           |          |              |
| 208 -> 212        | -0.30245  |           |           |          |              |
| 209 -> 213        | 0.49727   |           |           |          |              |
| 210 -> 216        | 0.11369   |           |           |          |              |
| 211 -> 216        | -0.29226  |           |           |          |              |
| Excited State 15: | Singlet-A | 4.2953 eV | 288.65 nm | f=0.0104 | <S**2>=0.000 |
| 206 -> 212        | 0.64543   |           |           |          |              |
| 211 -> 217        | -0.23470  |           |           |          |              |
| Excited State 16: | Singlet-A | 4.3189 eV | 287.08 nm | f=0.0122 | <S**2>=0.000 |
| 206 -> 212        | 0.23258   |           |           |          |              |
| 208 -> 213        | 0.24547   |           |           |          |              |
| 211 -> 217        | 0.60315   |           |           |          |              |
| Excited State 17: | Singlet-A | 4.3626 eV | 284.20 nm | f=0.0155 | <S**2>=0.000 |
| 208 -> 213        | 0.33700   |           |           |          |              |
| 209 -> 214        | 0.20942   |           |           |          |              |
| 210 -> 217        | 0.56174   |           |           |          |              |
| Excited State 18: | Singlet-A | 4.4037 eV | 281.55 nm | f=0.0170 | <S**2>=0.000 |
| 208 -> 213        | 0.42061   |           |           |          |              |
| 209 -> 214        | -0.30707  |           |           |          |              |
| 210 -> 217        | -0.20375  |           |           |          |              |
| 210 -> 218        | 0.18705   |           |           |          |              |
| 211 -> 217        | -0.18889  |           |           |          |              |
| 211 -> 218        | -0.30737  |           |           |          |              |
| Excited State 19: | Singlet-A | 4.4173 eV | 280.68 nm | f=0.0084 | <S**2>=0.000 |
| 208 -> 213        | 0.15732   |           |           |          |              |
| 209 -> 214        | -0.24089  |           |           |          |              |
| 210 -> 218        | 0.13797   |           |           |          |              |
| 211 -> 218        | 0.60063   |           |           |          |              |
| Excited State 20: | Singlet-A | 4.4790 eV | 276.81 nm | f=0.0181 | <S**2>=0.000 |
| 205 -> 212        | -0.12750  |           |           |          |              |
| 208 -> 213        | -0.29267  |           |           |          |              |
| 209 -> 214        | -0.29193  |           |           |          |              |

|                   |           |           |           |          |              |  |  |
|-------------------|-----------|-----------|-----------|----------|--------------|--|--|
| 210 -> 217        | 0.26113   |           |           |          |              |  |  |
| 210 -> 218        | 0.44775   |           |           |          |              |  |  |
| Excited State 21: | Singlet-A | 4.5275 eV | 273.84 nm | f=0.0065 | <S**2>=0.000 |  |  |
| 205 -> 212        | 0.66171   |           |           |          |              |  |  |
| 210 -> 218        | 0.12658   |           |           |          |              |  |  |
| Excited State 22: | Singlet-A | 4.5677 eV | 271.44 nm | f=0.0560 | <S**2>=0.000 |  |  |
| 209 -> 214        | 0.43925   |           |           |          |              |  |  |
| 209 -> 216        | 0.13464   |           |           |          |              |  |  |
| 210 -> 217        | -0.19121  |           |           |          |              |  |  |
| 210 -> 218        | 0.43989   |           |           |          |              |  |  |
| Excited State 23: | Singlet-A | 4.7433 eV | 261.39 nm | f=0.0031 | <S**2>=0.000 |  |  |
| 204 -> 212        | 0.69312   |           |           |          |              |  |  |
| Excited State 24: | Singlet-A | 4.7700 eV | 259.93 nm | f=0.0031 | <S**2>=0.000 |  |  |
| 207 -> 213        | 0.59516   |           |           |          |              |  |  |
| 208 -> 214        | 0.31646   |           |           |          |              |  |  |
| 209 -> 215        | 0.15049   |           |           |          |              |  |  |
| Excited State 25: | Singlet-A | 4.8096 eV | 257.78 nm | f=0.0276 | <S**2>=0.000 |  |  |
| 207 -> 213        | 0.21784   |           |           |          |              |  |  |
| 208 -> 214        | -0.19629  |           |           |          |              |  |  |
| 209 -> 216        | 0.12610   |           |           |          |              |  |  |
| 210 -> 219        | 0.34614   |           |           |          |              |  |  |
| 210 -> 220        | -0.26116  |           |           |          |              |  |  |
| 211 -> 219        | 0.35832   |           |           |          |              |  |  |
| 211 -> 220        | -0.21715  |           |           |          |              |  |  |
| 211 -> 221        | -0.11719  |           |           |          |              |  |  |
| Excited State 26: | Singlet-A | 4.8487 eV | 255.71 nm | f=0.0071 | <S**2>=0.000 |  |  |
| 207 -> 213        | -0.26074  |           |           |          |              |  |  |
| 208 -> 214        | 0.38171   |           |           |          |              |  |  |
| 209 -> 215        | 0.31232   |           |           |          |              |  |  |
| 209 -> 216        | 0.21041   |           |           |          |              |  |  |
| 210 -> 219        | 0.17955   |           |           |          |              |  |  |
| 210 -> 220        | -0.26386  |           |           |          |              |  |  |
| 210 -> 221        | 0.12908   |           |           |          |              |  |  |
| Excited State 27: | Singlet-A | 4.8610 eV | 255.06 nm | f=0.0610 | <S**2>=0.000 |  |  |
| 206 -> 213        | 0.10617   |           |           |          |              |  |  |
| 209 -> 215        | 0.21199   |           |           |          |              |  |  |
| 210 -> 219        | -0.30791  |           |           |          |              |  |  |
| 210 -> 220        | 0.20155   |           |           |          |              |  |  |
| 211 -> 219        | 0.41414   |           |           |          |              |  |  |
| 211 -> 220        | -0.14360  |           |           |          |              |  |  |
| 211 -> 221        | -0.24362  |           |           |          |              |  |  |
| Excited State 28: | Singlet-A | 4.8799 eV | 254.07 nm | f=0.0204 | <S**2>=0.000 |  |  |
| 203 -> 212        | -0.15727  |           |           |          |              |  |  |
| 206 -> 213        | 0.12847   |           |           |          |              |  |  |
| 209 -> 215        | -0.22160  |           |           |          |              |  |  |
| 209 -> 216        | 0.49691   |           |           |          |              |  |  |
| 210 -> 219        | -0.10859  |           |           |          |              |  |  |
| 210 -> 220        | 0.14106   |           |           |          |              |  |  |
| 211 -> 220        | 0.16238   |           |           |          |              |  |  |
| 211 -> 221        | -0.26186  |           |           |          |              |  |  |
| Excited State 29: | Singlet-A | 4.9018 eV | 252.93 nm | f=0.0018 | <S**2>=0.000 |  |  |
| 203 -> 212        | 0.55922   |           |           |          |              |  |  |
| 206 -> 213        | 0.11483   |           |           |          |              |  |  |
| 209 -> 215        | -0.19572  |           |           |          |              |  |  |

|                   |           |           |           |          |              |  |  |
|-------------------|-----------|-----------|-----------|----------|--------------|--|--|
| 209 -> 216        | -0.10049  |           |           |          |              |  |  |
| 211 -> 220        | 0.16381   |           |           |          |              |  |  |
| 211 -> 221        | -0.23495  |           |           |          |              |  |  |
| Excited State 30: | Singlet-A | 4.9412 eV | 250.92 nm | f=0.0218 | <S**2>=0.000 |  |  |
| 203 -> 212        | 0.33404   |           |           |          |              |  |  |
| 206 -> 213        | 0.12525   |           |           |          |              |  |  |
| 209 -> 215        | 0.14635   |           |           |          |              |  |  |
| 209 -> 216        | 0.32917   |           |           |          |              |  |  |
| 211 -> 220        | -0.26062  |           |           |          |              |  |  |
| 211 -> 221        | 0.33493   |           |           |          |              |  |  |
| Excited State 31: | Singlet-A | 4.9930 eV | 248.31 nm | f=0.1593 | <S**2>=0.000 |  |  |
| 205 -> 213        | 0.13206   |           |           |          |              |  |  |
| 207 -> 213        | -0.10032  |           |           |          |              |  |  |
| 208 -> 214        | 0.38890   |           |           |          |              |  |  |
| 209 -> 215        | -0.31615  |           |           |          |              |  |  |
| 210 -> 220        | 0.13589   |           |           |          |              |  |  |
| 210 -> 221        | -0.17705  |           |           |          |              |  |  |
| 211 -> 219        | 0.18300   |           |           |          |              |  |  |
| 211 -> 220        | -0.14473  |           |           |          |              |  |  |
| 211 -> 221        | 0.21330   |           |           |          |              |  |  |
| Excited State 32: | Singlet-A | 5.0150 eV | 247.23 nm | f=0.0967 | <S**2>=0.000 |  |  |
| 206 -> 213        | 0.16752   |           |           |          |              |  |  |
| 209 -> 215        | -0.25757  |           |           |          |              |  |  |
| 210 -> 219        | -0.16564  |           |           |          |              |  |  |
| 210 -> 220        | -0.17422  |           |           |          |              |  |  |
| 210 -> 221        | 0.52850   |           |           |          |              |  |  |
| 211 -> 221        | 0.10938   |           |           |          |              |  |  |
| Excited State 33: | Singlet-A | 5.0433 eV | 245.84 nm | f=0.0105 | <S**2>=0.000 |  |  |
| 206 -> 213        | -0.17264  |           |           |          |              |  |  |
| 211 -> 219        | 0.34147   |           |           |          |              |  |  |
| 211 -> 220        | 0.45137   |           |           |          |              |  |  |
| 211 -> 221        | 0.26026   |           |           |          |              |  |  |
| 211 -> 222        | -0.16115  |           |           |          |              |  |  |
| Excited State 34: | Singlet-A | 5.0729 eV | 244.41 nm | f=0.0273 | <S**2>=0.000 |  |  |
| 203 -> 212        | -0.11538  |           |           |          |              |  |  |
| 206 -> 213        | 0.59393   |           |           |          |              |  |  |
| 209 -> 216        | -0.10432  |           |           |          |              |  |  |
| 210 -> 219        | 0.13688   |           |           |          |              |  |  |
| 211 -> 220        | 0.17272   |           |           |          |              |  |  |
| 211 -> 221        | 0.15196   |           |           |          |              |  |  |
| Excited State 35: | Singlet-A | 5.0921 eV | 243.48 nm | f=0.0025 | <S**2>=0.000 |  |  |
| 201 -> 212        | 0.62047   |           |           |          |              |  |  |
| 202 -> 212        | -0.17569  |           |           |          |              |  |  |
| 208 -> 215        | -0.18449  |           |           |          |              |  |  |
| Excited State 36: | Singlet-A | 5.1181 eV | 242.24 nm | f=0.0171 | <S**2>=0.000 |  |  |
| 208 -> 215        | -0.11961  |           |           |          |              |  |  |
| 210 -> 219        | 0.37290   |           |           |          |              |  |  |
| 210 -> 220        | 0.43184   |           |           |          |              |  |  |
| 210 -> 221        | 0.31358   |           |           |          |              |  |  |
| 210 -> 222        | -0.16914  |           |           |          |              |  |  |
| Excited State 37: | Singlet-A | 5.1503 eV | 240.73 nm | f=0.0071 | <S**2>=0.000 |  |  |
| 201 -> 212        | 0.16465   |           |           |          |              |  |  |
| 208 -> 215        | 0.64828   |           |           |          |              |  |  |
| 210 -> 220        | 0.11697   |           |           |          |              |  |  |

|               |            |           |           |           |          |              |
|---------------|------------|-----------|-----------|-----------|----------|--------------|
| Excited State | 38:        | Singlet-A | 5.1954 eV | 238.64 nm | f=0.0005 | <S**2>=0.000 |
|               | 201 -> 212 | 0.18092   |           |           |          |              |
|               | 202 -> 212 | 0.65584   |           |           |          |              |
| Excited State | 39:        | Singlet-A | 5.2328 eV | 236.93 nm | f=0.0159 | <S**2>=0.000 |
|               | 205 -> 213 | -0.18527  |           |           |          |              |
|               | 207 -> 214 | -0.32843  |           |           |          |              |
|               | 209 -> 217 | 0.56083   |           |           |          |              |
| Excited State | 40:        | Singlet-A | 5.2743 eV | 235.07 nm | f=0.0134 | <S**2>=0.000 |
|               | 207 -> 214 | 0.56660   |           |           |          |              |
|               | 208 -> 216 | 0.14874   |           |           |          |              |
|               | 209 -> 217 | 0.31217   |           |           |          |              |
|               | 211 -> 222 | -0.12814  |           |           |          |              |
| Excited State | 41:        | Singlet-A | 5.2828 eV | 234.69 nm | f=0.0132 | <S**2>=0.000 |
|               | 207 -> 214 | 0.10998   |           |           |          |              |
|               | 208 -> 216 | 0.17487   |           |           |          |              |
|               | 211 -> 220 | 0.11272   |           |           |          |              |
|               | 211 -> 222 | 0.62207   |           |           |          |              |
| Excited State | 42:        | Singlet-A | 5.3072 eV | 233.61 nm | f=0.0419 | <S**2>=0.000 |
|               | 205 -> 213 | 0.21900   |           |           |          |              |
|               | 207 -> 214 | -0.16646  |           |           |          |              |
|               | 208 -> 216 | 0.59202   |           |           |          |              |
|               | 210 -> 222 | 0.13313   |           |           |          |              |
|               | 211 -> 222 | -0.12630  |           |           |          |              |
| Excited State | 43:        | Singlet-A | 5.3367 eV | 232.33 nm | f=0.0852 | <S**2>=0.000 |
|               | 205 -> 213 | 0.43645   |           |           |          |              |
|               | 206 -> 214 | 0.10148   |           |           |          |              |
|               | 208 -> 216 | -0.16752  |           |           |          |              |
|               | 209 -> 217 | 0.15342   |           |           |          |              |
|               | 209 -> 218 | 0.41115   |           |           |          |              |
|               | 211 -> 222 | 0.10578   |           |           |          |              |
|               | 211 -> 224 | 0.10887   |           |           |          |              |
| Excited State | 44:        | Singlet-A | 5.3746 eV | 230.68 nm | f=0.0167 | <S**2>=0.000 |
|               | 208 -> 216 | -0.14703  |           |           |          |              |
|               | 209 -> 218 | -0.23429  |           |           |          |              |
|               | 210 -> 221 | 0.10031   |           |           |          |              |
|               | 210 -> 222 | 0.59268   |           |           |          |              |
| Excited State | 45:        | Singlet-A | 5.3842 eV | 230.28 nm | f=0.1400 | <S**2>=0.000 |
|               | 205 -> 213 | -0.39220  |           |           |          |              |
|               | 208 -> 216 | 0.12918   |           |           |          |              |
|               | 209 -> 217 | -0.12276  |           |           |          |              |
|               | 209 -> 218 | 0.43321   |           |           |          |              |
|               | 210 -> 222 | 0.20850   |           |           |          |              |
| Excited State | 46:        | Singlet-A | 5.4224 eV | 228.65 nm | f=0.0194 | <S**2>=0.000 |
|               | 199 -> 212 | 0.13404   |           |           |          |              |
|               | 206 -> 214 | -0.13557  |           |           |          |              |
|               | 211 -> 222 | 0.10739   |           |           |          |              |
|               | 211 -> 223 | 0.31403   |           |           |          |              |
|               | 211 -> 224 | 0.48793   |           |           |          |              |
|               | 211 -> 225 | -0.18470  |           |           |          |              |
|               | 211 -> 226 | -0.14021  |           |           |          |              |
| Excited State | 47:        | Singlet-A | 5.4791 eV | 226.28 nm | f=0.0031 | <S**2>=0.000 |
|               | 199 -> 212 | 0.46585   |           |           |          |              |
|               | 200 -> 212 | -0.40716  |           |           |          |              |
|               | 206 -> 214 | 0.24382   |           |           |          |              |



|                   |           |           |           |          |              |  |  |  |  |
|-------------------|-----------|-----------|-----------|----------|--------------|--|--|--|--|
| 210 -> 224        | -0.12373  |           |           |          |              |  |  |  |  |
| Excited State 48: | Singlet-A | 5.4921 eV | 225.75 nm | f=0.0099 | <S**2>=0.000 |  |  |  |  |
| 204 -> 213        | -0.17210  |           |           |          |              |  |  |  |  |
| 206 -> 214        | 0.16371   |           |           |          |              |  |  |  |  |
| 210 -> 222        | 0.13862   |           |           |          |              |  |  |  |  |
| 210 -> 223        | 0.31644   |           |           |          |              |  |  |  |  |
| 210 -> 224        | 0.48120   |           |           |          |              |  |  |  |  |
| 210 -> 225        | -0.17349  |           |           |          |              |  |  |  |  |
| 210 -> 226        | -0.11628  |           |           |          |              |  |  |  |  |
| Excited State 49: | Singlet-A | 5.5164 eV | 224.76 nm | f=0.0059 | <S**2>=0.000 |  |  |  |  |
| 199 -> 212        | -0.12336  |           |           |          |              |  |  |  |  |
| 200 -> 212        | -0.19985  |           |           |          |              |  |  |  |  |
| 204 -> 213        | 0.60517   |           |           |          |              |  |  |  |  |
| 207 -> 215        | -0.13582  |           |           |          |              |  |  |  |  |
| 210 -> 224        | 0.12505   |           |           |          |              |  |  |  |  |
| Excited State 50: | Singlet-A | 5.5168 eV | 224.74 nm | f=0.0007 | <S**2>=0.000 |  |  |  |  |
| 197 -> 212        | -0.19529  |           |           |          |              |  |  |  |  |
| 198 -> 212        | 0.19089   |           |           |          |              |  |  |  |  |
| 199 -> 212        | 0.30885   |           |           |          |              |  |  |  |  |
| 200 -> 212        | 0.46536   |           |           |          |              |  |  |  |  |
| 204 -> 213        | 0.27229   |           |           |          |              |  |  |  |  |
| 206 -> 214        | 0.13426   |           |           |          |              |  |  |  |  |
| Excited State 51: | Singlet-A | 5.5346 eV | 224.02 nm | f=0.0144 | <S**2>=0.000 |  |  |  |  |
| 198 -> 212        | -0.11713  |           |           |          |              |  |  |  |  |
| 199 -> 212        | -0.20432  |           |           |          |              |  |  |  |  |
| 204 -> 213        | 0.10562   |           |           |          |              |  |  |  |  |
| 206 -> 214        | 0.18976   |           |           |          |              |  |  |  |  |
| 207 -> 215        | 0.55746   |           |           |          |              |  |  |  |  |
| 209 -> 218        | -0.10895  |           |           |          |              |  |  |  |  |
| 211 -> 223        | 0.16559   |           |           |          |              |  |  |  |  |
| Excited State 52: | Singlet-A | 5.5545 eV | 223.21 nm | f=0.0008 | <S**2>=0.000 |  |  |  |  |
| 197 -> 212        | 0.10254   |           |           |          |              |  |  |  |  |
| 198 -> 212        | 0.64553   |           |           |          |              |  |  |  |  |
| 200 -> 212        | -0.18695  |           |           |          |              |  |  |  |  |
| 207 -> 215        | 0.10344   |           |           |          |              |  |  |  |  |
| Excited State 53: | Singlet-A | 5.5608 eV | 222.96 nm | f=0.0071 | <S**2>=0.000 |  |  |  |  |
| 207 -> 215        | -0.14194  |           |           |          |              |  |  |  |  |
| 211 -> 223        | 0.55254   |           |           |          |              |  |  |  |  |
| 211 -> 224        | -0.25658  |           |           |          |              |  |  |  |  |
| 211 -> 225        | 0.16419   |           |           |          |              |  |  |  |  |
| 211 -> 226        | 0.19740   |           |           |          |              |  |  |  |  |
| Excited State 54: | Singlet-A | 5.5888 eV | 221.84 nm | f=0.0601 | <S**2>=0.000 |  |  |  |  |
| 198 -> 212        | 0.10566   |           |           |          |              |  |  |  |  |
| 199 -> 212        | -0.18777  |           |           |          |              |  |  |  |  |
| 206 -> 214        | 0.38050   |           |           |          |              |  |  |  |  |
| 206 -> 216        | -0.11464  |           |           |          |              |  |  |  |  |
| 207 -> 215        | -0.27303  |           |           |          |              |  |  |  |  |
| 210 -> 223        | -0.25184  |           |           |          |              |  |  |  |  |
| 210 -> 225        | -0.10714  |           |           |          |              |  |  |  |  |
| 211 -> 224        | 0.12127   |           |           |          |              |  |  |  |  |
| 211 -> 226        | 0.21698   |           |           |          |              |  |  |  |  |
| 211 -> 228        | 0.12160   |           |           |          |              |  |  |  |  |
| Excited State 55: | Singlet-A | 5.6103 eV | 220.99 nm | f=0.0054 | <S**2>=0.000 |  |  |  |  |
| 206 -> 214        | -0.15098  |           |           |          |              |  |  |  |  |
| 208 -> 217        | 0.27775   |           |           |          |              |  |  |  |  |

|                   |           |           |           |          |              |  |  |  |  |
|-------------------|-----------|-----------|-----------|----------|--------------|--|--|--|--|
| 210 -> 223        | 0.26807   |           |           |          |              |  |  |  |  |
| 210 -> 225        | 0.10797   |           |           |          |              |  |  |  |  |
| 211 -> 224        | 0.16963   |           |           |          |              |  |  |  |  |
| 211 -> 226        | 0.44878   |           |           |          |              |  |  |  |  |
| 211 -> 228        | 0.15358   |           |           |          |              |  |  |  |  |
| Excited State 56: | Singlet-A | 5.6279 eV | 220.30 nm | f=0.0014 | <S**2>=0.000 |  |  |  |  |
| 206 -> 214        | 0.11717   |           |           |          |              |  |  |  |  |
| 210 -> 223        | 0.21840   |           |           |          |              |  |  |  |  |
| 210 -> 224        | -0.11599  |           |           |          |              |  |  |  |  |
| 211 -> 224        | 0.20646   |           |           |          |              |  |  |  |  |
| 211 -> 225        | 0.50556   |           |           |          |              |  |  |  |  |
| 211 -> 226        | -0.11888  |           |           |          |              |  |  |  |  |
| 211 -> 227        | 0.26650   |           |           |          |              |  |  |  |  |
| Excited State 57: | Singlet-A | 5.6359 eV | 219.99 nm | f=0.0042 | <S**2>=0.000 |  |  |  |  |
| 197 -> 212        | 0.45313   |           |           |          |              |  |  |  |  |
| 199 -> 212        | 0.20358   |           |           |          |              |  |  |  |  |
| 206 -> 214        | -0.11978  |           |           |          |              |  |  |  |  |
| 208 -> 217        | 0.15034   |           |           |          |              |  |  |  |  |
| 210 -> 223        | -0.27135  |           |           |          |              |  |  |  |  |
| 210 -> 224        | 0.19258   |           |           |          |              |  |  |  |  |
| 211 -> 225        | 0.19165   |           |           |          |              |  |  |  |  |
| Excited State 58: | Singlet-A | 5.6436 eV | 219.69 nm | f=0.0077 | <S**2>=0.000 |  |  |  |  |
| 197 -> 212        | 0.44685   |           |           |          |              |  |  |  |  |
| 200 -> 212        | 0.10840   |           |           |          |              |  |  |  |  |
| 206 -> 214        | 0.17392   |           |           |          |              |  |  |  |  |
| 208 -> 217        | -0.16139  |           |           |          |              |  |  |  |  |
| 210 -> 223        | 0.27557   |           |           |          |              |  |  |  |  |
| 210 -> 224        | -0.21665  |           |           |          |              |  |  |  |  |
| 211 -> 225        | -0.18907  |           |           |          |              |  |  |  |  |
| Excited State 59: | Singlet-A | 5.6671 eV | 218.78 nm | f=0.0130 | <S**2>=0.000 |  |  |  |  |
| 206 -> 214        | 0.11867   |           |           |          |              |  |  |  |  |
| 208 -> 217        | 0.48728   |           |           |          |              |  |  |  |  |
| 208 -> 218        | 0.12692   |           |           |          |              |  |  |  |  |
| 210 -> 226        | 0.13889   |           |           |          |              |  |  |  |  |
| 211 -> 226        | -0.30258  |           |           |          |              |  |  |  |  |
| 211 -> 227        | -0.21568  |           |           |          |              |  |  |  |  |
| Excited State 60: | Singlet-A | 5.6797 eV | 218.29 nm | f=0.0244 | <S**2>=0.000 |  |  |  |  |
| 208 -> 217        | 0.13920   |           |           |          |              |  |  |  |  |
| 210 -> 225        | -0.19910  |           |           |          |              |  |  |  |  |
| 210 -> 226        | 0.18933   |           |           |          |              |  |  |  |  |
| 210 -> 227        | -0.10445  |           |           |          |              |  |  |  |  |
| 211 -> 224        | -0.13058  |           |           |          |              |  |  |  |  |
| 211 -> 225        | -0.22731  |           |           |          |              |  |  |  |  |
| 211 -> 227        | 0.50258   |           |           |          |              |  |  |  |  |
| 211 -> 228        | -0.14635  |           |           |          |              |  |  |  |  |
| 211 -> 230        | -0.10909  |           |           |          |              |  |  |  |  |
| Excited State 61: | Singlet-A | 5.6839 eV | 218.13 nm | f=0.0008 | <S**2>=0.000 |  |  |  |  |
| 203 -> 213        | 0.16653   |           |           |          |              |  |  |  |  |
| 208 -> 217        | 0.18004   |           |           |          |              |  |  |  |  |
| 210 -> 225        | 0.40545   |           |           |          |              |  |  |  |  |
| 210 -> 226        | -0.38070  |           |           |          |              |  |  |  |  |
| 210 -> 227        | 0.11930   |           |           |          |              |  |  |  |  |
| 211 -> 227        | 0.20813   |           |           |          |              |  |  |  |  |
| Excited State 62: | Singlet-A | 5.7078 eV | 217.22 nm | f=0.0062 | <S**2>=0.000 |  |  |  |  |
| 203 -> 213        | -0.12856  |           |           |          |              |  |  |  |  |
| 208 -> 217        | -0.15143  |           |           |          |              |  |  |  |  |

|            |         |
|------------|---------|
| 210 -> 224 | 0.23985 |
| 210 -> 225 | 0.40031 |
| 210 -> 226 | 0.38421 |
| 210 -> 227 | 0.11337 |
| 210 -> 228 | 0.14677 |

Excited State 63: Singlet-A 5.7288 eV 216.42 nm f=0.0062 <S\*\*2>=0.000

|            |         |
|------------|---------|
| 195 -> 212 | 0.11309 |
| 196 -> 212 | 0.63361 |
| 203 -> 213 | 0.19482 |
| 205 -> 214 | 0.10534 |
| 210 -> 226 | 0.11675 |

Excited State 64: Singlet-A 5.7421 eV 215.92 nm f=0.0109 <S\*\*2>=0.000

|            |          |
|------------|----------|
| 195 -> 212 | 0.24661  |
| 196 -> 212 | -0.29418 |
| 203 -> 213 | 0.49238  |
| 205 -> 214 | 0.19078  |
| 210 -> 226 | 0.16936  |

---

JOB name: na92ETD2

Method/Basis: TD-B3LYP-D3/6-311G(d) [hexane]//B3PW91-D3/6-31G(d)
