# Supplementary material
Source: MDPI journal article supplement (https://www.mdpi.com/2304-6740/6/4/107)
Supplement: s1 [file s1]

Archive with 9 entries (8 files):
- Cif and checkCif files/
- Cif and checkCif files/2018si301a_checkcif.pdf
- Cif and checkCif files/2018si302a_checkcif.pdf
- Cif and checkCif files/2018si303a_checkcif.pdf
- Cif and checkCif files/si301a.cif
- Cif and checkCif files/si302a.cif
- Cif and checkCif files/si303a.cif
- inorganics-359404-Supplementary Materials.pdf
- inorganics-359404.xyz
