# Supplementary material
Source: MDPI journal article supplement (https://www.mdpi.com/2304-6740/6/4/107)
Supplement: s1 [file s1 › Cif and checkCif files/si301a.cif]

 
data_si301a
 
_audit_creation_method            SHELXL-2014
_chemical_name_systematic
;
 ?
;
_chemical_name_common             ?
_chemical_melting_point           ?
_chemical_formula_moiety          ?
_chemical_formula_sum
 'C32 H76 Si11' 
_chemical_formula_weight          769.91

loop_
 _atom_type_symbol
 _atom_type_description
 _atom_type_scat_dispersion_real
 _atom_type_scat_dispersion_imag
 _atom_type_scat_source
 'Si'  'Si'   0.0817   0.0704
 'International Tables Vol C Tables 4.2.6.8 and 6.1.1.4'
 'C'  'C'   0.0033   0.0016
 'International Tables Vol C Tables 4.2.6.8 and 6.1.1.4'
 'H'  'H'   0.0000   0.0000
 'International Tables Vol C Tables 4.2.6.8 and 6.1.1.4'
 
_space_group_crystal_system       orthorhombic
_space_group_IT_number            61
_space_group_name_H-M_alt         'P b c a'
_space_group_name_Hall            '-P 2ac 2ab'
 
_shelx_space_group_comment
;
The symmetry employed for this shelxl refinement is uniquely defined
by the following loop, which should always be used as a source of
symmetry information in preference to the above space-group names.
They are only intended as comments.
;
 
loop_
 _space_group_symop_operation_xyz
 'x, y, z'
 '-x+1/2, -y, z+1/2'
 'x+1/2, -y+1/2, -z'
 '-x, y+1/2, -z+1/2'
 '-x, -y, -z'
 'x-1/2, y, -z-1/2'
 '-x-1/2, y-1/2, z'
 'x, -y-1/2, z-1/2'
 
_cell_length_a                    11.3287(13)
_cell_length_b                    17.976(2)
_cell_length_c                    46.325(5)
_cell_angle_alpha                 90
_cell_angle_beta                  90
_cell_angle_gamma                 90
_cell_volume                      9433.6(19)
_cell_formula_units_Z             8
_cell_measurement_temperature     100(2)
_cell_measurement_reflns_used      9925
_cell_measurement_theta_min        2.27
_cell_measurement_theta_max       27.88
 
_exptl_crystal_description        plate
_exptl_crystal_colour             orange
_exptl_crystal_density_meas       ? 
_exptl_crystal_density_method     ?              
_exptl_crystal_density_diffrn     1.084          
_exptl_crystal_F_000              3376
_exptl_transmission_factor_min    ?                                             
_exptl_transmission_factor_max    ?                                             
_exptl_crystal_size_max           0.100
_exptl_crystal_size_mid           0.100
_exptl_crystal_size_min           0.030
_exptl_absorpt_coefficient_mu     0.324
_shelx_estimated_absorpt_T_min    0.968
_shelx_estimated_absorpt_T_max    0.990
_exptl_absorpt_correction_type    empirical
_exptl_absorpt_correction_T_min   0.6940  
_exptl_absorpt_correction_T_max   0.7456
_exptl_absorpt_process_details    
;
SADABS Sheldrick 1996
;
_exptl_special_details
;
 ?
;
 
_diffrn_ambient_temperature       100(2)
_diffrn_radiation_wavelength      0.71073
_diffrn_radiation_type            MoK\a
_diffrn_radiation_source          'Bruker TXS fine-focus rotating anode' 
_diffrn_radiation_monochromator   'Bruker Helios multilayer confocal mirror' 
_diffrn_measurement_device_type   'Bruker APEXII CCD area detector' 
_diffrn_measurement_method        'phi and omega scans' 
_diffrn_detector_area_resol_mean  8.333
_diffrn_reflns_number             43749
_diffrn_reflns_av_unetI/netI      0.0253
_diffrn_reflns_av_R_equivalents   0.0341
_diffrn_reflns_limit_h_min        -7
_diffrn_reflns_limit_h_max        13
_diffrn_reflns_limit_k_min        -21
_diffrn_reflns_limit_k_max        21
_diffrn_reflns_limit_l_min        -54
_diffrn_reflns_limit_l_max        55
_diffrn_reflns_theta_min          1.758
_diffrn_reflns_theta_max          25.408
_diffrn_reflns_theta_full         25.242
_diffrn_measured_fraction_theta_max   0.999
_diffrn_measured_fraction_theta_full  1.000
_diffrn_reflns_Laue_measured_fraction_max    0.999
_diffrn_reflns_Laue_measured_fraction_full   1.000
_diffrn_reflns_point_group_measured_fraction_max   0.999
_diffrn_reflns_point_group_measured_fraction_full  1.000
_reflns_number_total              8683
_reflns_number_gt                 7366
_reflns_threshold_expression      'I > 2\s(I)'
_reflns_Friedel_coverage          0.000
_reflns_Friedel_fraction_max      .
_reflns_Friedel_fraction_full     .
 
_reflns_special_details
;
 Reflections were merged by SHELXL according to the crystal
 class for the calculation of statistics and refinement.
 
 _reflns_Friedel_fraction is defined as the number of unique
 Friedel pairs measured divided by the number that would be
 possible theoretically, ignoring centric projections and
 systematic absences.
;
 
_computing_data_collection        'APEX2 (Bruker AXS, 2006)'
_computing_cell_refinement        'APEX2 (Bruker AXS, 2006)'
_computing_data_reduction         'SAINT (Bruker AXS, 2004)'
_computing_structure_solution     'SHELXS-97 (Sheldrick, 1997)'
_computing_structure_refinement   'SHELXL-2014 (Sheldrick, 2014)'
_computing_molecular_graphics     'XSHEL (Bruker AXS,2002)'
_computing_publication_material   'XCIF (Bruker AXS, 2001)' 
 
_refine_special_details
;
 ?
;
_refine_ls_structure_factor_coef  Fsqd
_refine_ls_matrix_type            full
_refine_ls_weighting_scheme       calc
_refine_ls_weighting_details
'w=1/[\s^2^(Fo^2^)+(0.0266P)^2^+10.8510P] where P=(Fo^2^+2Fc^2^)/3'
_atom_sites_solution_primary      ?
_atom_sites_solution_secondary    ?
_atom_sites_solution_hydrogens    geom
_refine_ls_hydrogen_treatment     constr
_refine_ls_extinction_method      none
_refine_ls_extinction_coef        .
_refine_ls_number_reflns          8683
_refine_ls_number_parameters      412
_refine_ls_number_restraints      18
_refine_ls_R_factor_all           0.0482
_refine_ls_R_factor_gt            0.0377
_refine_ls_wR_factor_ref          0.0839
_refine_ls_wR_factor_gt           0.0793
_refine_ls_goodness_of_fit_ref    1.099
_refine_ls_restrained_S_all       1.111
_refine_ls_shift/su_max           0.026
_refine_ls_shift/su_mean          0.003
 
loop_
 _atom_site_label
 _atom_site_type_symbol
 _atom_site_fract_x
 _atom_site_fract_y
 _atom_site_fract_z
 _atom_site_U_iso_or_equiv
 _atom_site_adp_type
 _atom_site_occupancy
 _atom_site_site_symmetry_order  
 _atom_site_calc_flag
 _atom_site_refinement_flags_posn
 _atom_site_refinement_flags_adp
 _atom_site_refinement_flags_occupancy
 _atom_site_disorder_assembly
 _atom_site_disorder_group
Si1 Si 0.48184(5) 0.12030(3) 0.09537(2) 0.01386(13) Uani 1 1 d . . . . .
Si2 Si 0.55515(5) 0.12885(3) 0.14343(2) 0.01401(13) Uani 1 1 d . . . . .
Si3 Si 0.36415(5) 0.20084(3) 0.12363(2) 0.01465(13) Uani 1 1 d . . . . .
Si4 Si 0.50117(5) 0.25137(3) 0.15650(2) 0.01544(13) Uani 1 1 d . . . . .
Si5 Si 0.43312(5) 0.08358(3) 0.18120(2) 0.01523(13) Uani 1 1 d . . . . .
Si6 Si 0.26646(5) 0.14412(3) 0.16345(2) 0.01500(13) Uani 1 1 d . . . . .
Si7 Si 0.39468(5) 0.20652(3) 0.19516(2) 0.01543(13) Uani 1 1 d . . . . .
C1 C 0.42176(18) 0.03101(12) 0.07740(5) 0.0168(5) Uani 1 1 d . . . . .
C2 C 0.52343(19) 0.01810(13) 0.05492(5) 0.0201(5) Uani 1 1 d . . . . .
H1 H 0.5930 -0.0037 0.0647 0.024 Uiso 1 1 calc R U . . .
H2 H 0.4968 -0.0172 0.0399 0.024 Uiso 1 1 calc R U . . .
C3 C 0.5572(2) 0.09174(13) 0.04108(5) 0.0215(5) Uani 1 1 d . . . . .
H3 H 0.4910 0.1095 0.0289 0.026 Uiso 1 1 calc R U . . .
H4 H 0.6265 0.0842 0.0284 0.026 Uiso 1 1 calc R U . . .
C4 C 0.58725(18) 0.15269(12) 0.06442(4) 0.0164(4) Uani 1 1 d . . . . .
Si8 Si 0.41529(5) -0.05904(3) 0.09912(2) 0.01903(14) Uani 1 1 d . . . . .
C5 C 0.5625(2) -0.08048(13) 0.11543(5) 0.0229(5) Uani 1 1 d . . . . .
H5 H 0.5891 -0.0380 0.1270 0.034 Uiso 1 1 calc R U . . .
H6 H 0.6198 -0.0902 0.1000 0.034 Uiso 1 1 calc R U . . .
H7 H 0.5558 -0.1245 0.1278 0.034 Uiso 1 1 calc R U . . .
C6 C 0.3016(2) -0.06357(13) 0.12829(5) 0.0252(5) Uani 1 1 d . . . . .
H8 H 0.3159 -0.1074 0.1404 0.038 Uiso 1 1 calc R U . . .
H9 H 0.2229 -0.0671 0.1196 0.038 Uiso 1 1 calc R U . . .
H10 H 0.3063 -0.0186 0.1402 0.038 Uiso 1 1 calc R U . . .
C7 C 0.3858(2) -0.13903(14) 0.07402(6) 0.0315(6) Uani 1 1 d . . . . .
H11 H 0.3845 -0.1856 0.0850 0.047 Uiso 1 1 calc R U . . .
H12 H 0.4482 -0.1414 0.0594 0.047 Uiso 1 1 calc R U . . .
H13 H 0.3094 -0.1318 0.0645 0.047 Uiso 1 1 calc R U . . .
Si9 Si 0.27762(5) 0.04683(4) 0.05639(2) 0.02181(15) Uani 1 1 d . . . . .
C8 C 0.2401(2) 0.14581(15) 0.04820(6) 0.0350(6) Uani 1 1 d . . . . .
H14 H 0.1645 0.1479 0.0380 0.053 Uiso 1 1 calc R U . . .
H15 H 0.3020 0.1675 0.0361 0.053 Uiso 1 1 calc R U . . .
H16 H 0.2342 0.1739 0.0663 0.053 Uiso 1 1 calc R U . . .
C9 C 0.2850(2) -0.00027(17) 0.02026(5) 0.0365(7) Uani 1 1 d . . . . .
H17 H 0.2087 0.0046 0.0105 0.055 Uiso 1 1 calc R U . . .
H18 H 0.3035 -0.0531 0.0229 0.055 Uiso 1 1 calc R U . . .
H19 H 0.3466 0.0231 0.0085 0.055 Uiso 1 1 calc R U . . .
C10 C 0.1426(2) 0.00868(15) 0.07421(5) 0.0309(6) Uani 1 1 d . . . . .
H20 H 0.1349 0.0301 0.0936 0.046 Uiso 1 1 calc R U . . .
H21 H 0.1492 -0.0455 0.0757 0.046 Uiso 1 1 calc R U . . .
H22 H 0.0729 0.0215 0.0627 0.046 Uiso 1 1 calc R U . . .
Si10 Si 0.75082(5) 0.13983(3) 0.07358(2) 0.01805(13) Uani 1 1 d . . . . .
C11 C 0.79186(19) 0.04673(13) 0.08858(5) 0.0245(5) Uani 1 1 d . . . . .
H23 H 0.8761 0.0463 0.0934 0.037 Uiso 1 1 calc R U . . .
H24 H 0.7754 0.0081 0.0742 0.037 Uiso 1 1 calc R U . . .
H25 H 0.7455 0.0370 0.1060 0.037 Uiso 1 1 calc R U . . .
C12 C 0.8093(2) 0.20841(13) 0.10029(5) 0.0246(5) Uani 1 1 d . . . . .
H26 H 0.7704 0.2008 0.1190 0.037 Uiso 1 1 calc R U . . .
H27 H 0.7935 0.2590 0.0934 0.037 Uiso 1 1 calc R U . . .
H28 H 0.8946 0.2014 0.1025 0.037 Uiso 1 1 calc R U . . .
C13 C 0.8405(2) 0.14609(15) 0.03935(5) 0.0297(6) Uani 1 1 d . . . . .
H29 H 0.8056 0.1834 0.0265 0.045 Uiso 1 1 calc R U . . .
H30 H 0.8408 0.0976 0.0297 0.045 Uiso 1 1 calc R U . . .
H31 H 0.9217 0.1605 0.0441 0.045 Uiso 1 1 calc R U . . .
Si11 Si 0.56675(6) 0.24782(4) 0.04565(2) 0.02212(14) Uani 1 1 d . . . . .
C14 C 0.6922(2) 0.31645(14) 0.04818(6) 0.0314(6) Uani 1 1 d . . . . .
H32 H 0.6796 0.3568 0.0343 0.047 Uiso 1 1 calc R U . . .
H33 H 0.7667 0.2912 0.0438 0.047 Uiso 1 1 calc R U . . .
H34 H 0.6955 0.3371 0.0678 0.047 Uiso 1 1 calc R U . . .
C15 C 0.5504(2) 0.23254(15) 0.00556(5) 0.0343(6) Uani 1 1 d . . . . .
H35 H 0.4772 0.2052 0.0018 0.052 Uiso 1 1 calc R U . . .
H36 H 0.6178 0.2037 -0.0016 0.052 Uiso 1 1 calc R U . . .
H37 H 0.5478 0.2807 -0.0043 0.052 Uiso 1 1 calc R U . . .
C16 C 0.4353(2) 0.30300(14) 0.05699(6) 0.0305(6) Uani 1 1 d . . . . .
H38 H 0.4387 0.3119 0.0778 0.046 Uiso 1 1 calc R U . . .
H39 H 0.3632 0.2753 0.0523 0.046 Uiso 1 1 calc R U . . .
H40 H 0.4348 0.3507 0.0468 0.046 Uiso 1 1 calc R U . . .
C17 C 0.5884(2) 0.34225(12) 0.15504(5) 0.0207(5) Uani 1 1 d . . . . .
C18 C 0.7096(2) 0.32980(14) 0.16895(6) 0.0305(6) Uani 1 1 d . . . . .
H41 H 0.7545 0.2938 0.1575 0.046 Uiso 1 1 calc R U . . .
H42 H 0.6992 0.3106 0.1886 0.046 Uiso 1 1 calc R U . . .
H43 H 0.7526 0.3771 0.1697 0.046 Uiso 1 1 calc R U . . .
C19 C 0.5205(2) 0.40077(13) 0.17245(6) 0.0297(6) Uani 1 1 d . . . . .
H44 H 0.5621 0.4485 0.1714 0.045 Uiso 1 1 calc R U . . .
H45 H 0.5151 0.3849 0.1926 0.045 Uiso 1 1 calc R U . . .
H46 H 0.4409 0.4064 0.1645 0.045 Uiso 1 1 calc R U . . .
C20 C 0.6025(2) 0.36974(14) 0.12408(6) 0.0330(6) Uani 1 1 d . . . . .
H47 H 0.6549 0.4131 0.1238 0.049 Uiso 1 1 calc R U . . .
H48 H 0.5251 0.3837 0.1163 0.049 Uiso 1 1 calc R U . . .
H49 H 0.6367 0.3301 0.1122 0.049 Uiso 1 1 calc R U . . .
C21 C 0.4783(2) 0.00545(13) 0.20716(5) 0.0247(5) Uani 1 1 d . U . . .
C22 C 0.5871(4) 0.0313(2) 0.22300(10) 0.0991(18) Uani 1 1 d . U . . .
H50 H 0.6048 -0.0034 0.2387 0.149 Uiso 1 1 calc R U . . .
H51 H 0.5732 0.0810 0.2310 0.149 Uiso 1 1 calc R U . . .
H52 H 0.6539 0.0331 0.2096 0.149 Uiso 1 1 calc R U . . .
C23 C 0.3790(4) -0.00763(18) 0.22899(7) 0.0673(11) Uani 1 1 d . U . . .
H53 H 0.3085 -0.0255 0.2189 0.101 Uiso 1 1 calc R U . . .
H54 H 0.3607 0.0391 0.2389 0.101 Uiso 1 1 calc R U . . .
H55 H 0.4042 -0.0449 0.2432 0.101 Uiso 1 1 calc R U . . .
C24 C 0.4991(3) -0.06692(15) 0.19177(6) 0.0502(9) Uani 1 1 d . U . . .
H56 H 0.5584 -0.0597 0.1766 0.075 Uiso 1 1 calc R U . . .
H57 H 0.4251 -0.0841 0.1831 0.075 Uiso 1 1 calc R U . . .
H58 H 0.5274 -0.1042 0.2056 0.075 Uiso 1 1 calc R U . . .
C25 C 0.09798(19) 0.14085(13) 0.16741(5) 0.0200(5) Uani 1 1 d . . . . .
C26 C 0.0510(2) 0.22078(14) 0.16701(6) 0.0336(6) Uani 1 1 d . . . . .
H59 H -0.0353 0.2201 0.1681 0.050 Uiso 1 1 calc R U . . .
H60 H 0.0755 0.2453 0.1491 0.050 Uiso 1 1 calc R U . . .
H61 H 0.0830 0.2482 0.1836 0.050 Uiso 1 1 calc R U . . .
C27 C 0.0427(2) 0.09749(13) 0.14253(5) 0.0234(5) Uani 1 1 d . . . . .
H62 H 0.0738 0.0466 0.1424 0.035 Uiso 1 1 calc R U . . .
H63 H 0.0621 0.1219 0.1242 0.035 Uiso 1 1 calc R U . . .
H64 H -0.0432 0.0961 0.1450 0.035 Uiso 1 1 calc R U . . .
C28 C 0.0663(2) 0.10256(16) 0.19585(5) 0.0319(6) Uani 1 1 d . . . . .
H65 H -0.0197 0.1006 0.1979 0.048 Uiso 1 1 calc R U . . .
H66 H 0.1002 0.1306 0.2120 0.048 Uiso 1 1 calc R U . . .
H67 H 0.0982 0.0519 0.1959 0.048 Uiso 1 1 calc R U . . .
C29 C 0.36853(19) 0.24894(12) 0.23262(5) 0.0182(5) Uani 1 1 d . . . . .
C30 C 0.2922(2) 0.31894(13) 0.22999(5) 0.0257(5) Uani 1 1 d . . . . .
H68 H 0.2141 0.3054 0.2226 0.039 Uiso 1 1 calc R U . . .
H69 H 0.3298 0.3540 0.2167 0.039 Uiso 1 1 calc R U . . .
H70 H 0.2839 0.3422 0.2490 0.039 Uiso 1 1 calc R U . . .
C31 C 0.3084(2) 0.19306(13) 0.25272(5) 0.0245(5) Uani 1 1 d . . . . .
H71 H 0.2919 0.2169 0.2713 0.037 Uiso 1 1 calc R U . . .
H72 H 0.3605 0.1502 0.2557 0.037 Uiso 1 1 calc R U . . .
H73 H 0.2342 0.1763 0.2440 0.037 Uiso 1 1 calc R U . . .
C32 C 0.4887(2) 0.26960(14) 0.24558(5) 0.0271(5) Uani 1 1 d . . . . .
H74 H 0.4774 0.2897 0.2651 0.041 Uiso 1 1 calc R U . . .
H75 H 0.5269 0.3072 0.2334 0.041 Uiso 1 1 calc R U . . .
H76 H 0.5387 0.2252 0.2466 0.041 Uiso 1 1 calc R U . . .
 
loop_
 _atom_site_aniso_label
 _atom_site_aniso_U_11
 _atom_site_aniso_U_22
 _atom_site_aniso_U_33
 _atom_site_aniso_U_23
 _atom_site_aniso_U_13
 _atom_site_aniso_U_12
Si1 0.0128(3) 0.0149(3) 0.0138(3) -0.0002(2) 0.0007(2) 0.0007(2)
Si2 0.0141(3) 0.0134(3) 0.0146(3) 0.0004(2) -0.0002(2) 0.0007(2)
Si3 0.0142(3) 0.0149(3) 0.0148(3) 0.0005(2) 0.0002(2) 0.0022(2)
Si4 0.0160(3) 0.0130(3) 0.0174(3) -0.0002(2) 0.0004(2) -0.0010(2)
Si5 0.0167(3) 0.0139(3) 0.0151(3) 0.0014(2) 0.0006(2) -0.0002(2)
Si6 0.0143(3) 0.0162(3) 0.0145(3) -0.0009(2) 0.0002(2) -0.0008(2)
Si7 0.0166(3) 0.0155(3) 0.0141(3) -0.0017(2) 0.0004(2) -0.0011(2)
C1 0.0124(10) 0.0215(12) 0.0165(11) -0.0041(9) 0.0005(8) 0.0012(9)
C2 0.0173(11) 0.0231(12) 0.0200(12) -0.0064(9) 0.0032(9) 0.0000(9)
C3 0.0209(11) 0.0278(13) 0.0157(11) -0.0028(9) 0.0030(9) 0.0008(10)
C4 0.0157(10) 0.0189(11) 0.0145(11) 0.0005(9) 0.0027(8) 0.0013(9)
Si8 0.0171(3) 0.0156(3) 0.0244(3) -0.0042(3) 0.0010(2) -0.0014(2)
C5 0.0223(12) 0.0178(12) 0.0286(13) 0.0031(10) 0.0008(10) 0.0007(9)
C6 0.0235(12) 0.0232(13) 0.0289(13) -0.0004(10) 0.0047(10) -0.0038(10)
C7 0.0312(14) 0.0239(13) 0.0395(15) -0.0089(11) -0.0008(12) -0.0034(11)
Si9 0.0169(3) 0.0291(4) 0.0194(3) -0.0070(3) -0.0029(2) 0.0018(3)
C8 0.0305(14) 0.0390(16) 0.0355(15) 0.0006(12) -0.0136(12) 0.0072(12)
C9 0.0270(14) 0.0555(18) 0.0268(14) -0.0143(13) -0.0050(11) 0.0022(13)
C10 0.0169(12) 0.0444(16) 0.0313(14) -0.0096(12) -0.0008(10) 0.0005(11)
Si10 0.0142(3) 0.0187(3) 0.0212(3) 0.0020(2) 0.0028(2) 0.0007(2)
C11 0.0166(11) 0.0224(13) 0.0344(14) 0.0002(10) 0.0004(10) 0.0022(9)
C12 0.0192(11) 0.0246(13) 0.0302(13) 0.0021(10) -0.0013(10) -0.0013(10)
C13 0.0221(12) 0.0358(15) 0.0314(14) 0.0019(11) 0.0092(10) 0.0005(11)
Si11 0.0237(3) 0.0234(3) 0.0193(3) 0.0069(3) 0.0025(3) 0.0039(3)
C14 0.0344(14) 0.0278(14) 0.0320(14) 0.0117(11) 0.0062(11) -0.0022(11)
C15 0.0426(15) 0.0392(16) 0.0212(13) 0.0116(11) -0.0005(11) 0.0038(13)
C16 0.0322(14) 0.0224(13) 0.0369(15) 0.0090(11) 0.0036(11) 0.0084(11)
C17 0.0220(11) 0.0130(11) 0.0269(13) 0.0012(9) -0.0007(10) -0.0032(9)
C18 0.0246(13) 0.0255(13) 0.0413(15) 0.0007(11) -0.0057(11) -0.0073(11)
C19 0.0329(14) 0.0162(12) 0.0400(15) -0.0030(11) -0.0005(11) -0.0036(10)
C20 0.0369(14) 0.0280(14) 0.0339(15) 0.0110(11) 0.0029(12) -0.0067(12)
C21 0.0347(13) 0.0190(12) 0.0203(12) 0.0057(9) -0.0042(10) -0.0011(10)
C22 0.102(3) 0.067(3) 0.128(4) 0.060(3) -0.090(3) -0.036(2)
C23 0.115(3) 0.0347(18) 0.053(2) 0.0215(15) 0.045(2) 0.0209(19)
C24 0.090(2) 0.0311(16) 0.0297(15) 0.0091(12) 0.0076(16) 0.0330(16)
C25 0.0152(11) 0.0247(12) 0.0200(12) -0.0054(9) 0.0018(9) -0.0031(9)
C26 0.0200(12) 0.0304(14) 0.0503(17) -0.0141(12) -0.0026(12) 0.0057(11)
C27 0.0200(11) 0.0270(13) 0.0233(12) -0.0029(10) -0.0025(9) -0.0008(10)
C28 0.0237(13) 0.0499(17) 0.0220(13) -0.0053(12) 0.0049(10) -0.0116(12)
C29 0.0177(11) 0.0192(11) 0.0177(11) -0.0037(9) -0.0016(9) 0.0023(9)
C30 0.0267(12) 0.0223(13) 0.0281(13) -0.0034(10) 0.0016(10) 0.0057(10)
C31 0.0280(12) 0.0287(13) 0.0168(12) -0.0017(10) 0.0031(10) 0.0034(10)
C32 0.0252(12) 0.0313(14) 0.0248(13) -0.0091(10) -0.0062(10) 0.0013(10)
 
_geom_special_details
;
 All esds (except the esd in the dihedral angle between two l.s. planes)
 are estimated using the full covariance matrix.  The cell esds are taken
 into account individually in the estimation of esds in distances, angles
 and torsion angles; correlations between esds in cell parameters are only
 used when they are defined by crystal symmetry.  An approximate (isotropic)
 treatment of cell esds is used for estimating esds involving l.s. planes.
;
 
loop_
 _geom_bond_atom_site_label_1
 _geom_bond_atom_site_label_2
 _geom_bond_distance
 _geom_bond_site_symmetry_2
 _geom_bond_publ_flag
Si1 C1 1.932(2) . ?
Si1 C4 1.955(2) . ?
Si1 Si3 2.3638(8) . ?
Si1 Si2 2.3813(8) . ?
Si2 Si4 2.3645(8) . ?
Si2 Si5 2.3738(8) . ?
Si2 Si3 2.6829(8) . ?
Si3 Si4 2.3566(8) . ?
Si3 Si6 2.3804(8) . ?
Si4 C17 1.910(2) . ?
Si4 Si7 2.3051(8) . ?
Si5 C21 1.919(2) . ?
Si5 Si6 2.3292(8) . ?
Si5 Si7 2.3435(9) . ?
Si6 C25 1.918(2) . ?
Si6 Si7 2.3511(8) . ?
Si7 C29 1.918(2) . ?
C1 C2 1.570(3) . ?
C1 Si8 1.907(2) . ?
C1 Si9 1.922(2) . ?
C2 C3 1.520(3) . ?
C3 C4 1.577(3) . ?
C4 Si10 1.915(2) . ?
C4 Si11 1.932(2) . ?
Si8 C6 1.868(2) . ?
Si8 C5 1.871(2) . ?
Si8 C7 1.879(2) . ?
Si9 C8 1.868(3) . ?
Si9 C10 1.869(2) . ?
Si9 C9 1.877(2) . ?
Si10 C12 1.868(2) . ?
Si10 C11 1.871(2) . ?
Si10 C13 1.887(2) . ?
Si11 C16 1.865(2) . ?
Si11 C14 1.886(3) . ?
Si11 C15 1.886(3) . ?
C17 C20 1.526(3) . ?
C17 C19 1.533(3) . ?
C17 C18 1.533(3) . ?
C21 C24 1.502(4) . ?
C21 C22 1.508(4) . ?
C21 C23 1.531(4) . ?
C25 C27 1.526(3) . ?
C25 C28 1.529(3) . ?
C25 C26 1.532(3) . ?
C29 C31 1.530(3) . ?
C29 C30 1.532(3) . ?
C29 C32 1.534(3) . ?
 
loop_
 _geom_angle_atom_site_label_1
 _geom_angle_atom_site_label_2
 _geom_angle_atom_site_label_3
 _geom_angle
 _geom_angle_site_symmetry_1
 _geom_angle_site_symmetry_3
 _geom_angle_publ_flag
C1 Si1 C4 98.43(9) . . ?
C1 Si1 Si3 123.28(7) . . ?
C4 Si1 Si3 124.64(7) . . ?
C1 Si1 Si2 125.40(7) . . ?
C4 Si1 Si2 116.97(7) . . ?
Si3 Si1 Si2 68.86(3) . . ?
Si4 Si2 Si5 88.85(3) . . ?
Si4 Si2 Si1 102.08(3) . . ?
Si5 Si2 Si1 117.64(3) . . ?
Si4 Si2 Si3 55.23(2) . . ?
Si5 Si2 Si3 87.00(3) . . ?
Si1 Si2 Si3 55.26(2) . . ?
Si4 Si3 Si1 102.85(3) . . ?
Si4 Si3 Si6 88.32(3) . . ?
Si1 Si3 Si6 115.41(3) . . ?
Si4 Si3 Si2 55.51(2) . . ?
Si1 Si3 Si2 55.88(2) . . ?
Si6 Si3 Si2 84.46(3) . . ?
C17 Si4 Si7 126.67(8) . . ?
C17 Si4 Si3 130.35(8) . . ?
Si7 Si4 Si3 91.29(3) . . ?
C17 Si4 Si2 130.82(8) . . ?
Si7 Si4 Si2 90.49(3) . . ?
Si3 Si4 Si2 69.26(3) . . ?
C21 Si5 Si6 141.23(8) . . ?
C21 Si5 Si7 124.53(8) . . ?
Si6 Si5 Si7 60.42(2) . . ?
C21 Si5 Si2 123.89(8) . . ?
Si6 Si5 Si2 92.96(3) . . ?
Si7 Si5 Si2 89.33(3) . . ?
C25 Si6 Si5 139.32(8) . . ?
C25 Si6 Si7 124.71(7) . . ?
Si5 Si6 Si7 60.09(3) . . ?
C25 Si6 Si3 123.36(8) . . ?
Si5 Si6 Si3 95.56(3) . . ?
Si7 Si6 Si3 89.58(3) . . ?
C29 Si7 Si4 130.14(7) . . ?
C29 Si7 Si5 130.79(7) . . ?
Si4 Si7 Si5 91.04(3) . . ?
C29 Si7 Si6 131.26(7) . . ?
Si4 Si7 Si6 90.26(3) . . ?
Si5 Si7 Si6 59.49(2) . . ?
C2 C1 Si8 104.63(14) . . ?
C2 C1 Si9 108.01(14) . . ?
Si8 C1 Si9 111.10(11) . . ?
C2 C1 Si1 98.63(13) . . ?
Si8 C1 Si1 119.43(11) . . ?
Si9 C1 Si1 113.24(11) . . ?
C3 C2 C1 109.62(18) . . ?
C2 C3 C4 111.72(18) . . ?
C3 C4 Si10 106.10(14) . . ?
C3 C4 Si11 106.29(14) . . ?
Si10 C4 Si11 108.83(11) . . ?
C3 C4 Si1 99.44(14) . . ?
Si10 C4 Si1 113.12(11) . . ?
Si11 C4 Si1 121.35(11) . . ?
C6 Si8 C5 108.28(11) . . ?
C6 Si8 C7 106.96(11) . . ?
C5 Si8 C7 104.52(11) . . ?
C6 Si8 C1 116.41(10) . . ?
C5 Si8 C1 110.70(10) . . ?
C7 Si8 C1 109.25(11) . . ?
C8 Si9 C10 104.66(12) . . ?
C8 Si9 C9 104.99(13) . . ?
C10 Si9 C9 105.36(12) . . ?
C8 Si9 C1 115.90(11) . . ?
C10 Si9 C1 114.66(11) . . ?
C9 Si9 C1 110.30(11) . . ?
C12 Si10 C11 104.84(11) . . ?
C12 Si10 C13 109.05(11) . . ?
C11 Si10 C13 103.40(11) . . ?
C12 Si10 C4 114.21(10) . . ?
C11 Si10 C4 115.52(10) . . ?
C13 Si10 C4 109.14(10) . . ?
C16 Si11 C14 103.68(12) . . ?
C16 Si11 C15 106.05(12) . . ?
C14 Si11 C15 103.32(12) . . ?
C16 Si11 C4 116.09(10) . . ?
C14 Si11 C4 117.42(10) . . ?
C15 Si11 C4 109.02(11) . . ?
C20 C17 C19 109.0(2) . . ?
C20 C17 C18 110.4(2) . . ?
C19 C17 C18 109.2(2) . . ?
C20 C17 Si4 111.38(16) . . ?
C19 C17 Si4 107.98(15) . . ?
C18 C17 Si4 108.88(15) . . ?
C24 C21 C22 111.7(3) . . ?
C24 C21 C23 107.2(2) . . ?
C22 C21 C23 109.1(3) . . ?
C24 C21 Si5 112.23(17) . . ?
C22 C21 Si5 107.31(18) . . ?
C23 C21 Si5 109.29(19) . . ?
C27 C25 C28 108.95(19) . . ?
C27 C25 C26 109.12(19) . . ?
C28 C25 C26 110.6(2) . . ?
C27 C25 Si6 110.57(15) . . ?
C28 C25 Si6 109.25(16) . . ?
C26 C25 Si6 108.38(15) . . ?
C31 C29 C30 109.66(18) . . ?
C31 C29 C32 108.41(19) . . ?
C30 C29 C32 109.48(19) . . ?
C31 C29 Si7 111.00(15) . . ?
C30 C29 Si7 109.99(15) . . ?
C32 C29 Si7 108.25(15) . . ?
 
loop_
 _geom_torsion_atom_site_label_1
 _geom_torsion_atom_site_label_2
 _geom_torsion_atom_site_label_3
 _geom_torsion_atom_site_label_4
 _geom_torsion
 _geom_torsion_site_symmetry_1
 _geom_torsion_site_symmetry_2
 _geom_torsion_site_symmetry_3
 _geom_torsion_site_symmetry_4
 _geom_torsion_publ_flag
C1 Si1 Si2 Si4 -147.44(8) . . . . ?
C4 Si1 Si2 Si4 88.25(8) . . . . ?
Si3 Si1 Si2 Si4 -30.89(3) . . . . ?
C1 Si1 Si2 Si5 -52.34(9) . . . . ?
C4 Si1 Si2 Si5 -176.64(8) . . . . ?
Si3 Si1 Si2 Si5 64.21(3) . . . . ?
C1 Si1 Si2 Si3 -116.55(8) . . . . ?
C4 Si1 Si2 Si3 119.15(8) . . . . ?
C1 Si1 Si3 Si4 150.39(8) . . . . ?
C4 Si1 Si3 Si4 -77.79(9) . . . . ?
Si2 Si1 Si3 Si4 31.11(3) . . . . ?
C1 Si1 Si3 Si6 56.09(9) . . . . ?
C4 Si1 Si3 Si6 -172.09(8) . . . . ?
Si2 Si1 Si3 Si6 -63.19(3) . . . . ?
C1 Si1 Si3 Si2 119.28(9) . . . . ?
C4 Si1 Si3 Si2 -108.90(8) . . . . ?
Si1 Si3 Si4 C17 95.28(10) . . . . ?
Si6 Si3 Si4 C17 -149.03(10) . . . . ?
Si2 Si3 Si4 C17 126.54(10) . . . . ?
Si1 Si3 Si4 Si7 -121.30(3) . . . . ?
Si6 Si3 Si4 Si7 -5.60(3) . . . . ?
Si2 Si3 Si4 Si7 -90.04(3) . . . . ?
Si1 Si3 Si4 Si2 -31.26(3) . . . . ?
Si6 Si3 Si4 Si2 84.43(3) . . . . ?
Si5 Si2 Si4 C17 146.86(10) . . . . ?
Si1 Si2 Si4 C17 -95.09(10) . . . . ?
Si3 Si2 Si4 C17 -126.00(10) . . . . ?
Si5 Si2 Si4 Si7 4.05(3) . . . . ?
Si1 Si2 Si4 Si7 122.10(3) . . . . ?
Si3 Si2 Si4 Si7 91.19(3) . . . . ?
Si5 Si2 Si4 Si3 -87.14(3) . . . . ?
Si1 Si2 Si4 Si3 30.91(3) . . . . ?
Si4 Si2 Si5 C21 -136.45(9) . . . . ?
Si1 Si2 Si5 C21 120.50(9) . . . . ?
Si3 Si2 Si5 C21 168.31(9) . . . . ?
Si4 Si2 Si5 Si6 56.35(3) . . . . ?
Si1 Si2 Si5 Si6 -46.71(4) . . . . ?
Si3 Si2 Si5 Si6 1.11(3) . . . . ?
Si4 Si2 Si5 Si7 -3.98(3) . . . . ?
Si1 Si2 Si5 Si7 -107.04(3) . . . . ?
Si3 Si2 Si5 Si7 -59.22(3) . . . . ?
C21 Si5 Si6 C25 -0.28(18) . . . . ?
Si7 Si5 Si6 C25 -109.80(11) . . . . ?
Si2 Si5 Si6 C25 162.65(11) . . . . ?
C21 Si5 Si6 Si7 109.52(13) . . . . ?
Si2 Si5 Si6 Si7 -87.55(3) . . . . ?
C21 Si5 Si6 Si3 -164.18(12) . . . . ?
Si7 Si5 Si6 Si3 86.30(3) . . . . ?
Si2 Si5 Si6 Si3 -1.25(3) . . . . ?
Si4 Si3 Si6 C25 138.10(9) . . . . ?
Si1 Si3 Si6 C25 -118.46(9) . . . . ?
Si2 Si3 Si6 C25 -166.39(9) . . . . ?
Si4 Si3 Si6 Si5 -54.39(3) . . . . ?
Si1 Si3 Si6 Si5 49.04(4) . . . . ?
Si2 Si3 Si6 Si5 1.11(3) . . . . ?
Si4 Si3 Si6 Si7 5.49(3) . . . . ?
Si1 Si3 Si6 Si7 108.93(3) . . . . ?
Si2 Si3 Si6 Si7 61.00(3) . . . . ?
C17 Si4 Si7 C29 1.12(13) . . . . ?
Si3 Si4 Si7 C29 -144.39(9) . . . . ?
Si2 Si4 Si7 C29 146.34(9) . . . . ?
C17 Si4 Si7 Si5 -149.33(9) . . . . ?
Si3 Si4 Si7 Si5 65.16(3) . . . . ?
Si2 Si4 Si7 Si5 -4.10(3) . . . . ?
C17 Si4 Si7 Si6 151.18(9) . . . . ?
Si3 Si4 Si7 Si6 5.67(3) . . . . ?
Si2 Si4 Si7 Si6 -63.59(3) . . . . ?
C21 Si5 Si7 C29 -14.06(14) . . . . ?
Si6 Si5 Si7 C29 120.18(9) . . . . ?
Si2 Si5 Si7 C29 -146.04(9) . . . . ?
C21 Si5 Si7 Si4 136.07(10) . . . . ?
Si6 Si5 Si7 Si4 -89.69(3) . . . . ?
Si2 Si5 Si7 Si4 4.09(3) . . . . ?
C21 Si5 Si7 Si6 -134.24(10) . . . . ?
Si2 Si5 Si7 Si6 93.78(3) . . . . ?
C25 Si6 Si7 C29 12.29(14) . . . . ?
Si5 Si6 Si7 C29 -119.45(10) . . . . ?
Si3 Si6 Si7 C29 143.89(10) . . . . ?
C25 Si6 Si7 Si4 -137.21(9) . . . . ?
Si5 Si6 Si7 Si4 91.05(3) . . . . ?
Si3 Si6 Si7 Si4 -5.61(3) . . . . ?
C25 Si6 Si7 Si5 131.74(10) . . . . ?
Si3 Si6 Si7 Si5 -96.66(3) . . . . ?
C4 Si1 C1 C2 21.05(15) . . . . ?
Si3 Si1 C1 C2 162.75(10) . . . . ?
Si2 Si1 C1 C2 -110.85(13) . . . . ?
C4 Si1 C1 Si8 133.33(12) . . . . ?
Si3 Si1 C1 Si8 -84.98(12) . . . . ?
Si2 Si1 C1 Si8 1.42(15) . . . . ?
C4 Si1 C1 Si9 -92.87(12) . . . . ?
Si3 Si1 C1 Si9 48.82(14) . . . . ?
Si2 Si1 C1 Si9 135.22(8) . . . . ?
Si8 C1 C2 C3 -166.63(15) . . . . ?
Si9 C1 C2 C3 74.93(19) . . . . ?
Si1 C1 C2 C3 -43.04(19) . . . . ?
C1 C2 C3 C4 53.3(2) . . . . ?
C2 C3 C4 Si10 86.27(18) . . . . ?
C2 C3 C4 Si11 -157.99(15) . . . . ?
C2 C3 C4 Si1 -31.26(19) . . . . ?
C1 Si1 C4 C3 4.30(15) . . . . ?
Si3 Si1 C4 C3 -136.66(11) . . . . ?
Si2 Si1 C4 C3 141.40(11) . . . . ?
C1 Si1 C4 Si10 -107.82(12) . . . . ?
Si3 Si1 C4 Si10 111.22(10) . . . . ?
Si2 Si1 C4 Si10 29.28(13) . . . . ?
C1 Si1 C4 Si11 120.03(13) . . . . ?
Si3 Si1 C4 Si11 -20.93(16) . . . . ?
Si2 Si1 C4 Si11 -102.87(11) . . . . ?
C2 C1 Si8 C6 -179.79(14) . . . . ?
Si9 C1 Si8 C6 -63.48(14) . . . . ?
Si1 C1 Si8 C6 71.22(15) . . . . ?
C2 C1 Si8 C5 56.01(16) . . . . ?
Si9 C1 Si8 C5 172.33(11) . . . . ?
Si1 C1 Si8 C5 -52.98(15) . . . . ?
C2 C1 Si8 C7 -58.56(16) . . . . ?
Si9 C1 Si8 C7 57.75(14) . . . . ?
Si1 C1 Si8 C7 -167.55(12) . . . . ?
C2 C1 Si9 C8 -92.54(17) . . . . ?
Si8 C1 Si9 C8 153.24(12) . . . . ?
Si1 C1 Si9 C8 15.60(16) . . . . ?
C2 C1 Si9 C10 145.29(15) . . . . ?
Si8 C1 Si9 C10 31.07(15) . . . . ?
Si1 C1 Si9 C10 -106.58(13) . . . . ?
C2 C1 Si9 C9 26.55(19) . . . . ?
Si8 C1 Si9 C9 -87.66(14) . . . . ?
Si1 C1 Si9 C9 134.69(13) . . . . ?
C3 C4 Si10 C12 178.20(14) . . . . ?
Si11 C4 Si10 C12 64.20(13) . . . . ?
Si1 C4 Si10 C12 -73.81(14) . . . . ?
C3 C4 Si10 C11 -60.08(17) . . . . ?
Si11 C4 Si10 C11 -174.08(11) . . . . ?
Si1 C4 Si10 C11 47.91(15) . . . . ?
C3 C4 Si10 C13 55.87(17) . . . . ?
Si11 C4 Si10 C13 -58.14(14) . . . . ?
Si1 C4 Si10 C13 163.86(12) . . . . ?
C3 C4 Si11 C16 108.02(16) . . . . ?
Si10 C4 Si11 C16 -138.10(12) . . . . ?
Si1 C4 Si11 C16 -4.19(18) . . . . ?
C3 C4 Si11 C14 -128.57(15) . . . . ?
Si10 C4 Si11 C14 -14.69(16) . . . . ?
Si1 C4 Si11 C14 119.22(14) . . . . ?
C3 C4 Si11 C15 -11.61(17) . . . . ?
Si10 C4 Si11 C15 102.27(13) . . . . ?
Si1 C4 Si11 C15 -123.82(14) . . . . ?
Si7 Si4 C17 C20 -155.78(14) . . . . ?
Si3 Si4 C17 C20 -23.7(2) . . . . ?
Si2 Si4 C17 C20 73.13(19) . . . . ?
Si7 Si4 C17 C19 -36.16(19) . . . . ?
Si3 Si4 C17 C19 95.87(17) . . . . ?
Si2 Si4 C17 C19 -167.25(12) . . . . ?
Si7 Si4 C17 C18 82.26(17) . . . . ?
Si3 Si4 C17 C18 -145.71(14) . . . . ?
Si2 Si4 C17 C18 -48.8(2) . . . . ?
Si6 Si5 C21 C24 96.9(2) . . . . ?
Si7 Si5 C21 C24 -178.89(18) . . . . ?
Si2 Si5 C21 C24 -62.5(2) . . . . ?
Si6 Si5 C21 C22 -140.1(3) . . . . ?
Si7 Si5 C21 C22 -55.8(3) . . . . ?
Si2 Si5 C21 C22 60.6(3) . . . . ?
Si6 Si5 C21 C23 -21.9(3) . . . . ?
Si7 Si5 C21 C23 62.3(2) . . . . ?
Si2 Si5 C21 C23 178.76(18) . . . . ?
Si5 Si6 C25 C27 -98.87(17) . . . . ?
Si7 Si6 C25 C27 178.28(12) . . . . ?
Si3 Si6 C25 C27 61.83(18) . . . . ?
Si5 Si6 C25 C28 21.0(2) . . . . ?
Si7 Si6 C25 C28 -61.81(18) . . . . ?
Si3 Si6 C25 C28 -178.26(13) . . . . ?
Si5 Si6 C25 C26 141.56(14) . . . . ?
Si7 Si6 C25 C26 58.72(19) . . . . ?
Si3 Si6 C25 C26 -57.73(18) . . . . ?
Si4 Si7 C29 C31 -170.88(12) . . . . ?
Si5 Si7 C29 C31 -31.53(19) . . . . ?
Si6 Si7 C29 C31 50.72(19) . . . . ?
Si4 Si7 C29 C30 67.58(17) . . . . ?
Si5 Si7 C29 C30 -153.07(12) . . . . ?
Si6 Si7 C29 C30 -70.82(18) . . . . ?
Si4 Si7 C29 C32 -52.00(19) . . . . ?
Si5 Si7 C29 C32 87.35(17) . . . . ?
Si6 Si7 C29 C32 169.59(12) . . . . ?
 
_refine_diff_density_max    0.705
_refine_diff_density_min   -0.665
_refine_diff_density_rms    0.056

_shelxl_version_number 2014-3

_shelx_res_file
;
TITL
REM  Yadorkari-X generated
CELL 0.71073 11.3287 17.9756 46.3250 90.0000 90.0000 90.0000
ZERR 8.0 0.0013 0.0021 0.0054 0.0000 0.0000 0.0000
LATT 1
SYMM 1/2-X, -Y, 1/2+Z
SYMM 1/2+X, 1/2-Y, -Z
SYMM -X, 1/2+Y, 1/2-Z

REM  SPGR Pbca orthorhombic
SFAC Si C H
UNIT 88 256 608
SIZE 0.10 0.10 0.03
TEMP -173.0
L.S. 1
FMAP 2
PLAN -20
ACTA
CONF 2.5
MERG 2
OMIT -10.000000 53.000000

RIGU 0.004 0.004 C22  C24  C23  C21

WGHT    0.026600   10.851001
FVAR       0.19526
SI1   1    0.481839    0.120305    0.095368    11.00000    0.01284    0.01492 =
         0.01383   -0.00020    0.00070    0.00075
SI2   1    0.555149    0.128854    0.143430    11.00000    0.01406    0.01342 =
         0.01455    0.00040   -0.00018    0.00073
SI3   1    0.364145    0.200842    0.123630    11.00000    0.01423    0.01492 =
         0.01480    0.00053    0.00016    0.00221
SI4   1    0.501173    0.251373    0.156501    11.00000    0.01596    0.01299 =
         0.01739   -0.00018    0.00036   -0.00105
SI5   1    0.433118    0.083584    0.181202    11.00000    0.01670    0.01388 =
         0.01510    0.00137    0.00059   -0.00022
SI6   1    0.266459    0.144121    0.163446    11.00000    0.01430    0.01621 =
         0.01449   -0.00095    0.00022   -0.00083
SI7   1    0.394683    0.206525    0.195165    11.00000    0.01662    0.01554 =
         0.01412   -0.00175    0.00045   -0.00110
C1    2    0.421757    0.031012    0.077402    11.00000    0.01244    0.02145 =
         0.01651   -0.00411    0.00049    0.00121
C2    2    0.523430    0.018105    0.054925    11.00000    0.01734    0.02306 =
         0.01997   -0.00639    0.00323   -0.00001
AFIX  23
H1    3    0.592970   -0.003660    0.064732    11.00000   -1.20000
H2    3    0.496761   -0.017205    0.039877    11.00000   -1.20000
AFIX   0
C3    2    0.557155    0.091741    0.041076    11.00000    0.02093    0.02784 =
         0.01567   -0.00280    0.00303    0.00081
AFIX  23
H3    3    0.491008    0.109464    0.028921    11.00000   -1.20000
H4    3    0.626523    0.084179    0.028414    11.00000   -1.20000
AFIX   0
C4    2    0.587247    0.152693    0.064415    11.00000    0.01574    0.01895 =
         0.01454    0.00047    0.00265    0.00129
SI8   1    0.415287   -0.059044    0.099122    11.00000    0.01706    0.01560 =
         0.02443   -0.00417    0.00102   -0.00136
C5    2    0.562533   -0.080484    0.115431    11.00000    0.02226    0.01780 =
         0.02864    0.00313    0.00079    0.00068
AFIX 137
H5    3    0.589069   -0.037982    0.126982    11.00000   -1.50000
H6    3    0.619824   -0.090216    0.100037    11.00000   -1.50000
H7    3    0.555817   -0.124482    0.127815    11.00000   -1.50000
AFIX   0
C6    2    0.301582   -0.063567    0.128287    11.00000    0.02353    0.02320 =
         0.02889   -0.00037    0.00466   -0.00384
AFIX 137
H8    3    0.315928   -0.107412    0.140360    11.00000   -1.50000
H9    3    0.222885   -0.067068    0.119609    11.00000   -1.50000
H10   3    0.306295   -0.018592    0.140188    11.00000   -1.50000
AFIX   0
C7    2    0.385812   -0.139029    0.074020    11.00000    0.03121    0.02394 =
         0.03947   -0.00891   -0.00075   -0.00344
AFIX 137
H11   3    0.384464   -0.185555    0.085042    11.00000   -1.50000
H12   3    0.448231   -0.141450    0.059404    11.00000   -1.50000
H13   3    0.309370   -0.131797    0.064523    11.00000   -1.50000
AFIX   0
SI9   1    0.277617    0.046827    0.056386    11.00000    0.01692    0.02914 =
         0.01938   -0.00703   -0.00294    0.00184
C8    2    0.240114    0.145806    0.048198    11.00000    0.03054    0.03902 =
         0.03546    0.00063   -0.01357    0.00717
AFIX 137
H14   3    0.164459    0.147884    0.037972    11.00000   -1.50000
H15   3    0.302016    0.167536    0.036063    11.00000   -1.50000
H16   3    0.234194    0.173922    0.066265    11.00000   -1.50000
AFIX   0
C9    2    0.284995   -0.000269    0.020258    11.00000    0.02703    0.05554 =
         0.02681   -0.01433   -0.00500    0.00220
AFIX 137
H17   3    0.208697    0.004565    0.010467    11.00000   -1.50000
H18   3    0.303514   -0.053074    0.022939    11.00000   -1.50000
H19   3    0.346627    0.023118    0.008510    11.00000   -1.50000
AFIX   0
C10   2    0.142596    0.008682    0.074213    11.00000    0.01687    0.04444 =
         0.03128   -0.00960   -0.00075    0.00052
AFIX 137
H20   3    0.134926    0.030062    0.093583    11.00000   -1.50000
H21   3    0.149179   -0.045547    0.075680    11.00000   -1.50000
H22   3    0.072872    0.021526    0.062726    11.00000   -1.50000
AFIX   0
SI10  1    0.750822    0.139829    0.073576    11.00000    0.01418    0.01873 =
         0.02123    0.00199    0.00281    0.00070
C11   2    0.791860    0.046728    0.088583    11.00000    0.01664    0.02242 =
         0.03441    0.00016    0.00044    0.00224
AFIX 137
H23   3    0.876119    0.046288    0.093369    11.00000   -1.50000
H24   3    0.775417    0.008130    0.074194    11.00000   -1.50000
H25   3    0.745540    0.036998    0.106046    11.00000   -1.50000
AFIX   0
C12   2    0.809262    0.208412    0.100290    11.00000    0.01915    0.02458 =
         0.03015    0.00214   -0.00127   -0.00133
AFIX 137
H26   3    0.770371    0.200824    0.118955    11.00000   -1.50000
H27   3    0.793507    0.259021    0.093432    11.00000   -1.50000
H28   3    0.894567    0.201369    0.102496    11.00000   -1.50000
AFIX   0
C13   2    0.840525    0.146090    0.039352    11.00000    0.02205    0.03577 =
         0.03140    0.00185    0.00923    0.00053
AFIX 137
H29   3    0.805641    0.183449    0.026522    11.00000   -1.50000
H30   3    0.840834    0.097612    0.029674    11.00000   -1.50000
H31   3    0.921699    0.160462    0.044081    11.00000   -1.50000
AFIX   0
SI11  1    0.566752    0.247822    0.045647    11.00000    0.02367    0.02339 =
         0.01929    0.00693    0.00251    0.00391
C14   2    0.692192    0.316453    0.048181    11.00000    0.03439    0.02777 =
         0.03205    0.01171    0.00616   -0.00222
AFIX 137
H32   3    0.679572    0.356796    0.034290    11.00000   -1.50000
H33   3    0.766738    0.291181    0.043818    11.00000   -1.50000
H34   3    0.695464    0.337054    0.067751    11.00000   -1.50000
AFIX   0
C15   2    0.550434    0.232543    0.005563    11.00000    0.04262    0.03919 =
         0.02121    0.01160   -0.00051    0.00381
AFIX 137
H35   3    0.477213    0.205225    0.001750    11.00000   -1.50000
H36   3    0.617796    0.203723   -0.001586    11.00000   -1.50000
H37   3    0.547816    0.280742   -0.004303    11.00000   -1.50000
AFIX   0
C16   2    0.435256    0.303000    0.056989    11.00000    0.03220    0.02244 =
         0.03692    0.00902    0.00361    0.00842
AFIX 137
H38   3    0.438679    0.311948    0.077840    11.00000   -1.50000
H39   3    0.363198    0.275328    0.052330    11.00000   -1.50000
H40   3    0.434802    0.350715    0.046756    11.00000   -1.50000
AFIX   0
C17   2    0.588393    0.342247    0.155041    11.00000    0.02202    0.01303 =
         0.02691    0.00117   -0.00075   -0.00324
C18   2    0.709603    0.329801    0.168952    11.00000    0.02462    0.02546 =
         0.04134    0.00074   -0.00569   -0.00733
AFIX 137
H41   3    0.754485    0.293758    0.157487    11.00000   -1.50000
H42   3    0.699157    0.310633    0.188591    11.00000   -1.50000
H43   3    0.752640    0.377058    0.169670    11.00000   -1.50000
AFIX   0
C19   2    0.520492    0.400774    0.172454    11.00000    0.03288    0.01617 =
         0.04003   -0.00297   -0.00050   -0.00358
AFIX 137
H44   3    0.562094    0.448497    0.171403    11.00000   -1.50000
H45   3    0.515052    0.384851    0.192643    11.00000   -1.50000
H46   3    0.440915    0.406396    0.164450    11.00000   -1.50000
AFIX   0
C20   2    0.602537    0.369742    0.124077    11.00000    0.03692    0.02799 =
         0.03395    0.01105    0.00293   -0.00668
AFIX 137
H47   3    0.654868    0.413148    0.123810    11.00000   -1.50000
H48   3    0.525140    0.383662    0.116324    11.00000   -1.50000
H49   3    0.636688    0.330079    0.112207    11.00000   -1.50000
AFIX   0
C21   2    0.478307    0.005455    0.207164    11.00000    0.03471    0.01898 =
         0.02031    0.00575   -0.00423   -0.00109
C22   2    0.587097    0.031308    0.222999    11.00000    0.10212    0.06737 =
         0.12793    0.06044   -0.08990   -0.03565
AFIX 137
H50   3    0.604849   -0.003390    0.238728    11.00000   -1.50000
H51   3    0.573211    0.081043    0.230971    11.00000   -1.50000
H52   3    0.653948    0.033076    0.209590    11.00000   -1.50000
AFIX   0
C23   2    0.378981   -0.007628    0.228989    11.00000    0.11460    0.03467 =
         0.05255    0.02151    0.04535    0.02095
AFIX 137
H53   3    0.308511   -0.025517    0.218872    11.00000   -1.50000
H54   3    0.360685    0.039127    0.238907    11.00000   -1.50000
H55   3    0.404162   -0.044868    0.243159    11.00000   -1.50000
AFIX   0
C24   2    0.499129   -0.066922    0.191774    11.00000    0.08985    0.03114 =
         0.02969    0.00912    0.00758    0.03297
AFIX 137
H56   3    0.558443   -0.059739    0.176629    11.00000   -1.50000
H57   3    0.425129   -0.084065    0.183067    11.00000   -1.50000
H58   3    0.527397   -0.104179    0.205585    11.00000   -1.50000
AFIX   0
C25   2    0.097981    0.140851    0.167412    11.00000    0.01519    0.02472 =
         0.01999   -0.00535    0.00182   -0.00311
C26   2    0.051046    0.220781    0.167009    11.00000    0.02005    0.03043 =
         0.05029   -0.01415   -0.00262    0.00567
AFIX 137
H59   3   -0.035328    0.220052    0.168142    11.00000   -1.50000
H60   3    0.075471    0.245256    0.149074    11.00000   -1.50000
H61   3    0.082973    0.248160    0.183553    11.00000   -1.50000
AFIX   0
C27   2    0.042739    0.097489    0.142528    11.00000    0.01997    0.02696 =
         0.02334   -0.00290   -0.00254   -0.00081
AFIX 137
H62   3    0.073844    0.046618    0.142412    11.00000   -1.50000
H63   3    0.062050    0.121931    0.124217    11.00000   -1.50000
H64   3   -0.043158    0.096067    0.144971    11.00000   -1.50000
AFIX   0
C28   2    0.066315    0.102560    0.195854    11.00000    0.02368    0.04991 =
         0.02198   -0.00531    0.00492   -0.01163
AFIX 137
H65   3   -0.019724    0.100610    0.197915    11.00000   -1.50000
H66   3    0.100164    0.130648    0.211986    11.00000   -1.50000
H67   3    0.098213    0.051883    0.195890    11.00000   -1.50000
AFIX   0
C29   2    0.368531    0.248944    0.232616    11.00000    0.01769    0.01918 =
         0.01768   -0.00370   -0.00156    0.00229
C30   2    0.292200    0.318943    0.229986    11.00000    0.02670    0.02226 =
         0.02806   -0.00337    0.00157    0.00570
AFIX 137
H68   3    0.214058    0.305375    0.222594    11.00000   -1.50000
H69   3    0.329838    0.354043    0.216670    11.00000   -1.50000
H70   3    0.283863    0.342200    0.249011    11.00000   -1.50000
AFIX   0
C31   2    0.308388    0.193058    0.252724    11.00000    0.02801    0.02866 =
         0.01681   -0.00170    0.00308    0.00336
AFIX 137
H71   3    0.291911    0.216868    0.271323    11.00000   -1.50000
H72   3    0.360530    0.150246    0.255718    11.00000   -1.50000
H73   3    0.234202    0.176265    0.244010    11.00000   -1.50000
AFIX   0
C32   2    0.488729    0.269596    0.245579    11.00000    0.02517    0.03125 =
         0.02476   -0.00914   -0.00618    0.00134
AFIX 137
H74   3    0.477408    0.289677    0.265050    11.00000   -1.50000
H75   3    0.526901    0.307153    0.233413    11.00000   -1.50000
H76   3    0.538674    0.225154    0.246555    11.00000   -1.50000

AFIX   0
HKLF 4 1 1 0 0 0 1 0 0 0 1

REM
REM R1 =  0.0377 for    7366 Fo > 4sig(Fo)  and  0.0482 for all    8683 data
REM    412 parameters refined using     18 restraints

END

WGHT      0.0266     10.8576

REM Highest difference peak  0.705,  deepest hole -0.665,  1-sigma level  0.056
Q1    1   0.6270  0.0115  0.2053  11.00000  0.05    0.71
Q2    1   0.5705  0.0406  0.2285  11.00000  0.05    0.67
Q3    1   0.4577  0.0111  0.2346  11.00000  0.05    0.65
Q4    1   0.5447  0.3039  0.1561  11.00000  0.05    0.37
Q5    1   0.3630  0.0491  0.0675  11.00000  0.05    0.32
Q6    1   0.4579  0.0399  0.1975  11.00000  0.05    0.31
Q7    1   0.6505  0.0694  0.2175  11.00000  0.05    0.31
Q8    1   0.7797  0.0890  0.0793  11.00000  0.05    0.31
Q9    1   0.4633  0.2330  0.1790  11.00000  0.05    0.31
Q10   1   0.1672  0.1405  0.1656  11.00000  0.05    0.30
Q11   1   0.2881  0.1625  0.1406  11.00000  0.05    0.30
Q12   1   0.5449  0.1518  0.0788  11.00000  0.05    0.30
Q13   1   0.4949 -0.0783  0.1725  11.00000  0.05    0.29
Q14   1   0.3088  0.1980  0.1823  11.00000  0.05    0.29
Q15   1   0.0900  0.1820  0.1674  11.00000  0.05    0.28
Q16   1   0.2640  0.1011  0.0551  11.00000  0.05    0.28
Q17   1   0.5045  0.2777  0.0537  11.00000  0.05    0.28
Q18   1   0.6449  0.1414  0.0714  11.00000  0.05    0.27
Q19   1   0.3649 -0.0566  0.1152  11.00000  0.05    0.27
Q20   1   0.5046 -0.0191  0.1960  11.00000  0.05    0.27
;
_shelx_res_checksum   33874

_shelx_hkl_file
;
   1   0   0   -7.86    0.63
   2   0   0 5524.34   88.73
   2   0   0 5401.19   87.05
   3   0   0   -8.84    2.24
   3   0   0   -5.08    1.77
   4   0   0 1620.94   26.54
   4   0   0 1631.70   27.24
   5   0   0    0.76    2.11
   5   0   0    4.13    2.69
   6   0   0 3872.18   62.50
   6   0   0 3848.17   61.36
   7   0   0    9.43    2.50
   7   0   0   12.06    3.40
   8   0   0    0.76    2.90
   9   0   0    2.86    3.29
  10   0   0    2.02    3.55
  11   0   0    3.41    3.85
  12   0   0   87.53    6.25
  13   0   0    0.67    4.39
   1   1   0   -1.54    1.58
   1   1   0   -0.36    0.76
   1  -1   0    0.93    0.85
   2   1   0    8.49    1.47
   2  -1   0    6.99    1.31
   2   1   0    7.21    2.46
   2  -1   0    9.57    1.38
   3  -1   0   -0.49    1.77
   3  -1   0    1.04    1.76
   3   1   0   -3.51    2.63
   3   1   0    1.23    1.79
   4  -1   0 3740.82   59.35
   4   1   0 3743.22   59.31
   4   1   0 3765.53   60.86
   4  -1   0 3891.26   60.21
   5   1   0    1.68    2.93
   5   1   0    0.49    2.10
   5  -1   0    3.25    2.13
   5  -1   0    1.37    2.31
   6  -1   0  402.85    9.25
   6   1   0  397.51    8.83
   6  -1   0  409.14    8.95
   6   1   0  380.98   10.00
   7   1   0   -2.03    2.19
   7  -1   0   -3.12    2.84
   7   1   0   -0.18    3.34
   7  -1   0    0.71    2.61
   8  -1   0    1.72    2.92
   8   1   0    3.32    2.93
   9  -1   0   -1.97    3.12
   9   1   0    0.09    2.79
  10   1   0  861.09   17.83
  10  -1   0  882.25   17.85
  11  -1   0   -6.23    3.63
  11   1   0    0.28    3.75
  12   1   0   14.70    4.11
  12  -1   0   13.21    4.58
  13  -1   0    2.73    4.25
  13   1   0    1.39    4.43
   0   2   0  960.27   16.45
  -1   2   0   -0.61    1.56
   1   2   0    1.24    2.27
   1   2   0    0.58    0.92
   2  -2   0   46.57    2.64
   2   2   0   48.72    2.47
   2   2   0   52.58    3.67
   2  -2   0   49.98    2.39
   3  -2   0    1.28    1.81
   3   2   0   -5.44    2.91
   3  -2   0   -1.03    1.43
   3   2   0   -4.22    1.61
   4  -2   0   40.14    3.03
   4   2   0   32.62    2.48
   4  -2   0   33.19    2.56
   4   2   0   37.28    3.85
   5   2   0   -3.40    2.05
   5  -2   0   -0.78    2.03
   5  -2   0   -2.19    2.00
   5   2   0   -1.13    3.18
   6  -2   0  179.62    5.78
   6   2   0  180.56    7.33
   6   2   0  168.28    5.48
   6  -2   0  159.67    5.50
   7  -2   0   -2.18    2.66
   7   2   0    0.27    3.68
   7  -2   0   -3.08    2.53
   7   2   0   -2.02    2.60
   8  -2   0  265.86    7.61
   8   2   0  274.65    7.79
   8   2   0  273.77    9.58
   9   2   0    2.55    3.35
   9  -2   0   -1.36    2.77
  10   2   0   12.74    3.73
  10  -2   0    9.60    3.38
  11  -2   0    5.75    3.87
  11   2   0   -0.14    3.63
  12   2   0    4.49    3.78
  12  -2   0   -2.83    3.97
  13  -2   0   -6.09    3.75
  13   2   0   -3.99    4.29
   0   3   0   -1.43    2.54
   1   3   0  -15.38    1.25
   1   3   0  -17.89    2.89
  -1  -3   0  -15.77    0.94
  -1   3   0  -12.49    2.25
   2   3   0 2061.87   34.46
   2   3   0 2027.90   32.21
   3  -3   0   -1.00    1.53
   3   3   0    0.89    1.68
   3   3   0    1.31    3.38
   3  -3   0    3.08    1.43
   4   3   0   -2.11    1.74
   4  -3   0    1.40    1.50
   4  -3   0   -0.61    1.90
   4   3   0   -0.21    3.33
   5   3   0   -3.28    3.37
   5  -3   0   -1.85    1.71
   5   3   0    0.53    2.10
   5  -3   0    2.01    1.86
   6  -3   0 1397.59   23.26
   6   3   0 1352.76   25.67
   6   3   0 1345.28   23.47
   6  -3   0 1367.69   23.58
   7  -3   0   -1.42    2.24
   7   3   0    1.39    2.60
   7   3   0   -5.13    3.89
   7  -3   0    2.15    2.53
   8   3   0   -2.03    2.52
   8  -3   0    0.76    2.86
   8   3   0   -0.61    4.21
   9  -3   0   -1.42    2.73
   9   3   0   -1.00    3.26
  10   3   0    9.23    3.65
  10  -3   0    6.95    3.65
  11   3   0    3.02    3.81
  11  -3   0   -3.04    3.66
  12   3   0  263.48    9.37
  12  -3   0  280.00    9.58
  13   3   0   -1.43    4.37
  13  -3   0    4.67    4.45
   0   4   0  244.42    7.62
  -1   4   0   -4.45    2.62
   1   4   0   -0.63    3.31
   1   4   0   -4.05    1.42
  -1  -4   0   -0.83    1.17
   2   4   0  338.68    9.64
   2   4   0  334.10    6.59
  -2   4   0  336.28    7.74
   3  -4   0    1.08    1.74
   3  -4   0    1.09    1.80
   3   4   0    0.66    1.66
   3   4   0   -3.28    3.43
   4   4   0  618.94   11.54
   4  -4   0  641.55   11.85
   4   4   0  619.39   14.24
   4  -4   0  640.23   11.21
   5  -4   0    0.07    1.61
   5  -4   0   -2.72    2.08
   5   4   0   -2.01    3.72
   5   4   0   -0.10    2.10
   6  -4   0 1145.23   19.37
   6   4   0 1128.19   19.92
   6  -4   0 1119.96   20.07
   6   4   0 1110.00   22.43
   7   4   0   -2.21    4.12
   7   4   0   -3.39    2.53
   7  -4   0    1.10    2.31
   8   4   0   23.02    3.48
   8   4   0   17.81    5.03
   8  -4   0   25.99    3.31
   9  -4   0   -1.61    2.72
   9   4   0   -2.56    3.25
  10  -4   0  548.37   12.94
  10   4   0  524.98   12.72
  11  -4   0    1.45    3.82
  11   4   0   -3.75    3.83
  12  -4   0   57.77    5.58
  12   4   0   44.36    5.35
  13   4   0    4.33    4.59
  13  -4   0   -0.59    4.29
   0   5   0   -3.46    3.29
  -1  -5   0   -0.76    1.23
   1   5   0   -1.68    3.45
   1   5   0    0.38    1.55
  -1   5   0   -4.07    2.82
   2   5   0  260.70    9.20
  -2   5   0  283.05    7.53
   2   5   0  279.96    5.84
   3  -5   0   -0.29    2.20
   3   5   0   -2.49    1.76
   3   5   0    1.82    3.83
   4   5   0   51.26    5.11
   4   5   0   52.24    3.14
   4  -5   0   56.77    3.17
   4  -5   0   55.47    3.43
   5  -5   0   -1.37    1.54
   5   5   0    3.24    2.10
   5   5   0   -0.88    3.86
   5  -5   0   -1.36    2.09
   6  -5   0   46.56    3.25
   6  -5   0   49.57    3.54
   6   5   0   47.74    5.55
   6   5   0   45.54    3.34
   7   5   0   -3.36    4.46
   7   5   0    1.06    2.69
   7  -5   0    0.36    2.64
   8   5   0  165.16    6.23
   8  -5   0  166.32    6.07
   8   5   0  162.49    8.95
   9  -5   0    0.31    3.22
   9   5   0    6.17    3.43
  10  -5   0   18.28    3.97
  10   5   0   29.19    4.36
  11  -5   0    6.81    3.98
  11   5   0   -0.21    3.99
  12  -5   0   -2.41    4.02
  12   5   0    1.36    4.26
  13  -5   0   -8.72    4.21
  13   5   0    0.00    4.58
   0  -6   0   20.13    1.90
   0   6   0   12.22    3.78
  -1  -6   0    0.60    1.43
   1   6   0   -0.64    1.59
   1   6   0   -1.25    3.62
  -1   6   0   -4.28    3.00
   2   6   0 9870.49  157.28
   2   6   0 9941.91  158.81
  -2   6   0 9999.91  159.69
  -3   6   0   -2.83    2.24
   3   6   0   -2.82    3.86
   3   6   0    1.15    1.71
   4   6   0  129.35    4.44
   4  -6   0  129.75    4.63
   4   6   0  120.84    7.84
   4  -6   0  132.15    4.67
   5  -6   0   -0.70    1.71
   5  -6   0    0.90    1.93
   5   6   0    2.45    4.24
   5   6   0   -1.88    1.99
   6  -6   0   16.95    2.17
   6   6   0   19.66    2.80
   6  -6   0   13.51    2.75
   6   6   0   10.79    4.70
   7  -6   0   -2.48    2.28
   7   6   0   -3.30    4.54
   7   6   0    1.87    2.81
   8   6   0  559.67   12.31
   8   6   0  558.07   15.72
   8  -6   0  553.60   12.49
   9   6   0    9.50    5.70
   9   6   0    0.52    3.26
   9  -6   0   -6.62    3.09
  10   6   0   10.62    3.85
  10  -6   0    6.57    3.28
  11   6   0    5.54    4.04
  11  -6   0    5.62    3.90
  12   6   0   50.24    5.45
  12  -6   0   34.31    5.07
  13  -6   0   11.06    4.80
  13   6   0    6.88    4.83
   0  -7   0    1.43    1.62
   0   7   0    1.18    3.66
   1   7   0    0.10    1.71
  -1  -7   0    1.63    1.51
   1   7   0    2.49    3.94
  -1   7   0    0.72    3.28
  -2  -7   0  570.87   10.11
   2   7   0  572.56   14.19
  -2   7   0  571.55   12.68
   2   7   0  556.63   10.46
   3   7   0   -1.03    4.07
   3   7   0   -0.49    1.94
  -3   7   0   -2.45    2.59
   4  -7   0  103.47    4.23
   4   7   0   91.46    3.78
   4   7   0   86.96    6.54
   4  -7   0   91.78    4.68
   5  -7   0   -0.59    1.96
   5  -7   0    3.12    2.27
   5   7   0    1.95    4.51
   5   7   0   -1.73    2.09
   6   7   0  341.89    8.18
   6   7   0  336.33   11.96
   6  -7   0  338.33    7.57
   6  -7   0  333.82    8.41
   7   7   0   -0.84    4.90
   7   7   0   -2.41    2.70
   7  -7   0   -4.13    2.66
   8  -7   0   57.71    4.38
   8   7   0   56.81    4.31
   8   7   0   57.14    7.03
   9  -7   0   -2.95    2.78
   9   7   0   -1.00    5.67
   9   7   0   -5.56    3.18
  10   7   0    7.46    3.68
  10  -7   0    5.52    3.68
  11   7   0   -7.21    3.86
  11  -7   0   -0.48    3.42
  12  -7   0  300.01   10.19
  12   7   0  292.76   10.34
   0   8   0 1229.90   24.01
   0  -8   0 1221.50   20.96
  -1  -8   0   -1.57    1.50
  -1   8   0    1.12    3.52
   1   8   0   -1.21    3.96
  -2  -8   0 2517.30   40.78
  -2   8   0 2485.12   42.76
   2   8   0 2506.52   39.98
  -3   8   0    1.33    2.94
   3   8   0   -3.97    4.22
   3   8   0    2.63    2.02
   4   8   0 1624.65   26.72
   4  -8   0 1604.84   27.96
   4   8   0 1568.20   31.07
   5   8   0   -4.95    4.56
   5  -8   0   -1.92    2.30
   5  -8   0   -1.50    2.21
   5   8   0   -1.73    2.19
   6   8   0   91.59    4.72
   6   8   0   90.86    7.44
   6  -8   0   93.31    4.30
   6  -8   0   90.47    4.72
   7   8   0    0.32    2.97
   7  -8   0   -2.65    2.38
   7   8   0   -2.08    5.37
   8   8   0  596.82   17.37
   8  -8   0  592.70   13.35
   8   8   0  616.97   13.23
   9   8   0    0.46    5.83
   9  -8   0   -0.47    3.29
   9   8   0    4.87    3.56
  10  -8   0  289.26    9.30
  10   8   0  300.26    9.35
  11   8   0   -0.47    4.14
  11  -8   0    3.26    3.90
  12   8   0  150.33    7.79
  12  -8   0  136.11    7.53
   0  -9   0   -2.95    1.67
   0   9   0   -0.61    4.03
  -1  -9   0   -0.90    1.56
  -1   9   0   -0.32    3.64
   1   9   0    5.22    4.34
   2   9   0 2800.44   49.23
   2   9   0 2793.91   44.30
  -2   9   0 2742.15   47.45
  -2  -9   0 2761.46   45.14
   3   9   0   -0.30    4.47
  -3   9   0    0.05    3.07
   3   9   0   -3.90    1.88
   4   9   0 1921.93   31.76
   4   9   0 1920.23   36.73
   5  -9   0    4.17    2.66
   5   9   0    1.44    5.02
   5   9   0   -2.92    2.47
   5  -9   0   -2.52    2.36
   6  -9   0  101.89    4.75
   6   9   0  116.23    4.82
   6   9   0  112.19    8.34
   6  -9   0  105.46    5.08
   7   9   0    8.99    3.24
   7   9   0   -2.84    5.51
   7  -9   0    2.92    2.95
   8   9   0   13.27    6.54
   8   9   0   18.46    3.55
   8  -9   0   13.31    3.53
   9   9   0    1.88    3.42
   9  -9   0   -0.70    3.21
   9   9   0    0.20    6.09
  10  -9   0  366.42   10.39
  10   9   0  361.82   10.40
  11  -9   0   -9.59    3.74
  11   9   0    3.49    4.29
  12   9   0   37.69    5.59
  12  -9   0   23.36    5.03
   0  10   0  846.40   19.16
   0 -10   0  824.83   15.16
  -1  10   0   -3.84    3.72
   1  10   0   -3.01    4.26
  -1 -10   0   -2.53    1.76
  -2  10   0  537.01   13.69
   2  10   0  549.82   15.19
  -2 -10   0  545.14   10.13
   2  10   0  535.74   10.59
   3  10   0    2.48    2.24
  -3  10   0    2.77    3.55
   3  10   0   -3.71    4.75
   4  10   0  970.02   22.63
   4  10   0  968.23   17.64
  -4  10   0  994.17   19.66
   5 -10   0    1.97    2.42
   5  10   0   -2.05    2.56
   5  10   0    0.90    5.33
   5 -10   0   -1.97    2.85
   6  10   0  961.04   23.35
   6 -10   0 1002.85   18.72
   6  10   0  975.71   18.35
   7  10   0    3.91    5.93
   7 -10   0   -1.79    2.89
   7  10   0   -5.51    3.08
   8  10   0   69.63    4.98
   8  10   0   52.09    7.77
   8 -10   0   71.92    5.10
   9 -10   0   -6.58    3.28
   9  10   0   -5.73    6.18
   9  10   0    1.79    3.85
  10 -10   0   12.87    4.10
  10  10   0   14.02    4.34
  11 -10   0    5.32    4.26
  11  10   0   10.71    4.84
  12 -10   0  528.85   14.22
  12  10   0  519.51   14.14
   0 -11   0    3.05    2.00
   0  11   0    1.36    4.41
  -1  11   0   -0.68    4.11
   1  11   0   -2.22    4.56
  -1 -11   0    0.22    1.86
  -2  11   0 1044.24   22.01
  -2 -11   0 1047.30   18.14
   2  11   0 1031.25   23.52
   3  11   0    0.36    2.33
  -3  11   0    2.71    3.66
   3  11   0    0.42    5.05
   4  11   0  128.57    9.60
  -4  11   0  127.56    7.14
   4  11   0  137.76    5.15
   5  11   0    5.34    2.61
   5  11   0   -0.82    5.54
   5 -11   0   -2.56    2.43
   5 -11   0   -5.23    2.89
   6  11   0   93.72    8.66
   6  11   0   98.88    5.18
   6 -11   0  105.49    5.24
   7 -11   0   -1.27    2.95
   7  11   0    1.40    3.02
   7  11   0   -3.54    5.90
   8 -11   0  159.78    6.77
   8  11   0  175.31   11.39
   8  11   0  174.05    6.70
   9  11   0    5.03    3.65
   9 -11   0   -4.62    3.31
   9  11   0   -4.17    6.52
  10 -11   0   21.66    4.39
  10  11   0   16.76    4.42
  11 -11   0   -4.79    3.94
  11  11   0    3.56    4.75
   0 -12   0  238.99    6.25
   0  12   0  235.67   10.50
   1 -12   0    0.27    2.35
   1  12   0   -0.99    4.87
  -1  12   0    3.08    4.51
  -1 -12   0    1.85    2.09
   2  12   0  472.81   15.01
  -2  12   0  485.79   13.85
   3  12   0    2.63    2.54
  -3  12   0    4.66    4.17
   3  12   0    2.64    5.43
   4  12   0   50.91    3.72
   4  12   0   50.42    7.19
  -4  12   0   56.56    5.40
   5  12   0    1.90    6.10
   5 -12   0   -6.19    3.29
   5 -12   0   -3.95    2.63
   5  12   0   -1.74    2.58
   6  12   0   84.67    5.08
   6  12   0   78.95    8.60
   6 -12   0   80.23    4.95
   7  12   0   -3.28    6.31
   7  12   0   -4.84    3.27
   7 -12   0    0.41    3.06
   8  12   0  202.70   12.36
   8 -12   0  205.41    7.68
   8  12   0  234.26    7.89
   9 -12   0   -0.77    3.50
   9  12   0   -2.61    4.04
   9  12   0    3.66    7.00
  10 -12   0   -3.31    3.69
  10  12   0    3.74    4.47
  11 -12   0    5.73    4.25
   0  13   0   -1.90    4.75
   0 -13   0    0.16    2.36
   1  13   0   -5.14    5.14
   1 -13   0    0.58    2.52
  -1  13   0   -3.34    4.64
   2  13   0   84.54    8.03
  -2  13   0  104.96    7.37
  -3  13   0    0.45    4.12
   3  13   0   -3.62    5.52
  -4  13   0  295.32   10.40
   4  13   0  263.96   12.64
   4  13   0  266.85    7.49
   5  13   0   -3.67    6.02
   5 -13   0   -1.05    3.74
   5  13   0   -0.16    3.02
   5 -13   0    2.17    2.80
   6 -13   0   27.73    3.73
   6  13   0    9.65    6.87
   6  13   0   27.54    3.85
   7 -13   0    3.46    3.35
   7  13   0    5.32    6.77
   7  13   0    5.46    3.61
   8  13   0    8.27    7.24
   8  13   0   11.07    4.05
   8 -13   0    0.53    3.45
   9  13   0  -10.55    6.93
   9 -13   0   -1.75    3.83
  10  13   0  374.36   16.42
  10 -13   0  373.36   11.17
   0  14   0  532.22   16.13
   1  14   0   -3.28    5.26
   1 -14   0   -2.83    2.52
  -1  14   0   -1.15    4.87
  -2  14   0  424.48   13.77
   2  14   0  426.88   15.10
   2 -14   0  435.85   10.33
   3  14   0    0.50    5.73
  -3  14   0   -0.62    4.68
   4  14   0  166.24   11.05
  -4  14   0  186.23    9.19
   4  14   0  179.27    6.30
   5  14   0    6.71    3.28
   5  14   0    0.35    6.52
   5 -14   0    2.15    4.15
   6  14   0  744.25   21.91
   6 -14   0  765.96   15.88
   6  14   0  742.23   15.54
   7 -14   0    2.00    3.36
   7  14   0    1.82    6.92
   8  14   0   88.12   10.04
   8 -14   0  109.24    6.39
   9  14   0    5.25    7.53
   9 -14   0    2.34    3.73
  10  14   0  107.99   10.98
  10 -14   0  136.62    7.16
   0  15   0   -3.82    5.21
   1  15   0    4.34    5.89
  -1  15   0   -0.51    5.25
   2  15   0  196.28   11.46
  -2  15   0  193.46   10.32
   2 -15   0  183.82    6.60
  -3  15   0   -6.84    4.59
   3  15   0   -0.28    5.93
  -4  15   0  355.98   12.36
   4  15   0  341.32   14.59
   5 -15   0   -3.14    4.07
   5  15   0    5.22    6.79
   6  15   0   16.38    7.38
   6 -15   0    7.46    3.59
   7 -15   0   -4.11    3.44
   7  15   0   -7.55    6.66
   8  15   0   93.47   10.43
   8 -15   0   95.67    6.02
   9  15   0    1.72    7.58
   9 -15   0   -1.25    3.91
   0  16   0  913.84   23.38
  -1  16   0    2.49    5.68
   1  16   0   -3.92    5.61
   2  16   0  283.50   13.33
  -2  16   0  320.06   12.76
   3  16   0   -2.04    6.17
  -3  16   0    4.81    5.36
   4  16   0  105.28    9.81
  -4  16   0  102.68    7.89
   5  16   0    1.83    6.89
   6  16   0  166.24   12.23
   6 -16   0  156.38    6.68
   7  16   0    2.56    7.61
   7 -16   0   -0.73    3.52
   8  16   0   18.58    8.33
   8 -16   0   18.04    4.19
   9 -16   0   -2.15    3.90
   9  16   0   -1.62    7.76
   0  17   0    1.20    6.06
   1  17   0   -3.44    6.00
  -1  17   0   -5.04    5.75
   2  17   0   13.26    6.72
  -2  17   0   15.19    6.20
   3  17   0   -6.27    6.33
  -3  17   0   -4.30    5.23
   4  17   0   -8.19    6.54
  -4  17   0   -6.03    5.11
   5  17   0    2.62    7.27
   6  17   0   13.23    7.87
   6 -17   0   22.25    4.27
   7 -17   0   -4.83    3.43
   7  17   0   -2.77    7.35
   8  17   0   32.73    8.98
   8 -17   0   33.97    4.76
   0  18   0 1188.14   28.78
   1  18   0   -7.46    6.15
  -1  18   0   -1.80    6.14
   2  18   0   19.81    7.16
  -2  18   0   22.04    6.93
  -3  18   0    0.04    5.80
   3  18   0   -0.65    6.65
   4  18   0    6.16    7.33
  -4  18   0    1.99    5.64
   5  18   0   -2.74    7.27
   6  18   0  189.85   13.36
   7  18   0    3.66    7.86
   0  19   0    5.94    6.78
   1  19   0    3.48    7.04
  -1  19   0   -7.62    6.15
   2  19   0  324.58   15.32
  -2  19   0  360.32   14.70
   3  19   0    7.28    6.98
  -3  19   0    4.52    6.13
   4  19   0   85.36   10.13
  -4  19   0  106.21    9.09
   5  19   0   -6.31    7.27
   6  19   0    6.26    8.19
   0  20   0  800.09   23.53
   1  20   0    2.02    7.00
  -1  20   0   -1.37    6.59
   2  20   0   91.92   10.30
  -2  20   0  112.46    9.90
  -3  20   0   -1.72    6.36
   3  20   0   -3.66    7.04
   4  20   0   10.64    7.77
   5  20   0   -4.47    7.53
   0  21   0   -3.98    7.06
  -1  21   0   -2.95    6.87
   1  21   0    2.56    7.54
   2  21   0   -6.36    7.02
  -2  21   0   -1.07    6.79
  -3  21   0   -0.72    6.88
   3  21   0   -7.07    7.21
   1   0   1   -2.64    1.02
   1   0  -1   -4.27    0.64
   1   0   1   -4.06    0.71
   2   0  -1    0.92    1.71
   2   0   1    0.56    1.17
   2   0  -1   -0.68    1.39
   2   0   1    0.25    1.77
   3   0  -1   -2.46    1.75
   3   0   1   -0.24    2.35
   3   0  -1   -2.44    2.12
   3   0   1   -1.64    1.54
   4   0  -1    0.55    1.67
   4   0   1   -1.00    1.86
   4   0   1   -2.88    2.42
   4   0  -1   -2.15    2.41
   5   0  -1   -0.80    2.55
   5   0  -1   -3.33    2.07
   5   0   1   -4.25    2.61
   5   0   1    2.64    1.86
   6   0   1   -0.68    2.94
   6   0  -1    0.15    2.38
   6   0  -1   -3.16    2.74
   6   0   1    3.17    2.37
   7   0  -1    2.15    2.63
   7   0  -1    1.02    3.09
   7   0   1    5.40    3.37
   7   0   1   -0.41    2.56
   8   0   1   -1.00    2.87
   8   0  -1   -1.34    2.90
   9   0  -1   -4.17    3.14
   9   0   1   -2.94    3.15
  10   0   1    6.00    3.54
  10   0  -1   -2.81    3.37
  11   0  -1   -2.44    3.31
  11   0   1   -6.32    3.64
  12   0  -1    0.18    3.99
  12   0   1    1.88    4.13
  13   0  -1   -6.95    4.14
  13   0   1   -5.81    4.19
   0   1  -1   -0.94    0.86
   1   1   1 3878.01   61.48
   1   1   1 3771.28   61.17
   1   1  -1 3735.92   61.55
   1   1  -1 3847.46   61.47
   1  -1   1 3897.92   63.00
   1  -1  -1 3907.67   62.01
   2   1  -1  885.71   14.72
   2  -1  -1  918.72   14.84
   2   1  -1  891.96   15.75
   2   1   1  883.73   15.92
   2   1   1  914.65   14.75
   2  -1   1  919.83   14.86
   2  -1   1  906.40   14.96
   3   1   1  595.55   11.74
   3   1  -1  588.96   10.33
   3   1  -1  561.86   11.30
   3  -1   1  583.08   10.54
   3   1   1  593.06   10.38
   3  -1   1  566.18   10.32
   3  -1  -1  578.36   10.32
   4  -1   1  251.43    6.02
   4   1   1  255.27    5.96
   4   1  -1  249.50    5.98
   4  -1   1  261.58    6.44
   4   1   1  254.68    7.44
   4  -1  -1  258.32    5.88
   4  -1  -1  259.44    6.15
   4   1  -1  241.87    7.05
   5   1  -1    2.67    2.16
   5   1   1    2.05    2.03
   5  -1   1    1.42    2.41
   5  -1  -1    3.11    1.88
   5  -1   1    0.00    2.12
   5  -1  -1    0.56    2.26
   5   1  -1   -2.75    2.78
   5   1   1   -1.12    2.97
   6  -1   1   73.17    5.02
   6   1   1   76.78    4.85
   6  -1  -1   79.13    3.86
   6   1   1   81.49    4.11
   6  -1  -1   82.39    4.80
   6   1  -1   82.72    5.49
   6   1  -1   66.28    4.01
   6  -1   1   74.34    4.12
   7  -1   1  557.91   12.04
   7   1   1  527.39   11.38
   7   1  -1  534.91   11.48
   7   1  -1  553.09   12.54
   7  -1  -1  559.25   11.62
   7  -1  -1  552.95   11.70
   7  -1   1  538.72   11.54
   7   1   1  541.01   12.79
   8   1   1  218.65    6.94
   8  -1  -1  222.83    7.07
   8   1  -1  221.04    7.01
   8   1   1  214.73    8.28
   8  -1   1  216.72    6.99
   9   1  -1   86.58    4.99
   9   1   1   90.00    5.24
   9  -1   1   85.03    5.27
   9  -1  -1   71.79    5.13
  10   1  -1   74.12    5.05
  10  -1  -1   72.30    5.02
  10  -1   1   89.80    5.65
  10   1   1   80.55    5.52
  11   1  -1   15.84    4.12
  11   1   1   15.77    4.11
  11  -1  -1   15.02    3.82
  11  -1   1    6.53    4.00
  12   1  -1    1.90    4.19
  12   1   1    1.40    4.21
  12  -1  -1    2.41    4.06
  12  -1   1    6.10    4.13
  13   1  -1  114.78    6.74
  13  -1   1  112.00    7.11
  13   1   1  109.03    7.01
  13  -1  -1  101.13    6.91
   0   2  -1 4859.84   76.73
   0  -2  -1 4685.09   78.61
   0   2   1 4697.87   76.00
   1   2  -1   23.16    2.62
   1   2  -1   27.12    1.66
  -1   2   1   28.29    2.02
   1   2   1   23.27    1.53
   1   2   1   27.60    2.78
  -1   2  -1   26.86    1.93
   2  -2  -1   23.42    1.84
   2   2  -1   24.92    1.83
   2  -2   1   30.11    1.73
   2   2   1   27.00    1.70
   2   2   1   23.24    3.24
   2  -2  -1   28.44    2.16
   2  -2   1   27.54    1.97
   2   2  -1   23.65    3.16
   3  -2   1   60.37    2.80
   3   2   1   53.52    2.91
   3  -2  -1   60.91    3.18
   3  -2   1   60.51    3.20
   3  -2  -1   57.31    2.45
   3   2  -1   51.06    2.97
   3   2  -1   57.55    3.99
   3   2   1   67.06    4.28
   4   2   1   86.34    3.32
   4   2   1   82.79    5.81
   4  -2   1   83.00    3.44
   4  -2   1   89.18    3.69
   4   2  -1   83.49    5.51
   4   2  -1   81.42    3.62
   4  -2  -1   91.99    3.78
   4  -2  -1   87.67    3.39
   5   2   1    3.51    3.32
   5  -2   1    3.85    2.17
   5  -2  -1    6.14    2.07
   5  -2   1    5.10    1.93
   5  -2  -1    1.13    2.17
   5   2  -1    7.19    3.39
   5   2   1    5.14    1.91
   5   2  -1    3.36    1.92
   6   2  -1  692.35   13.61
   6   2   1  722.23   15.43
   6  -2   1  724.10   13.78
   6  -2  -1  709.98   13.71
   6  -2   1  733.67   13.81
   6  -2  -1  758.18   13.57
   6   2   1  701.61   13.61
   6   2  -1  704.43   15.13
   7   2   1    1.12    3.77
   7   2   1    3.74    2.35
   7  -2   1    1.15    2.55
   7   2  -1    5.66    2.47
   7   2  -1    4.54    3.68
   7  -2   1    4.04    2.88
   7  -2  -1    2.22    2.66
   7  -2  -1    0.01    2.63
   8   2  -1    2.88    4.01
   8   2   1    7.83    4.40
   8  -2  -1    1.68    2.93
   8   2   1    2.46    2.62
   8  -2   1    2.78    3.02
   8   2  -1    8.12    3.13
   9  -2   1   82.84    4.95
   9   2  -1   81.97    5.25
   9  -2  -1   88.68    5.36
   9   2   1   98.39    5.44
  10  -2   1  452.32   11.27
  10   2   1  455.20   11.37
  10  -2  -1  444.46   11.24
  10   2  -1  443.26   11.37
  11  -2  -1  239.20    8.54
  11  -2   1  240.34    8.29
  11   2  -1  240.92    8.52
  11   2   1  239.89    8.46
  12  -2  -1    0.96    3.62
  12   2  -1   -2.99    4.04
  12   2   1    0.84    4.05
  12  -2   1    5.03    4.05
  13   2   1    7.04    4.46
  13  -2  -1   -7.00    4.20
  13   2  -1    2.24    4.48
  13  -2   1   -9.48    4.24
   0   3  -1   -1.09    2.47
   0  -3  -1   -1.27    1.19
   0   3   1    1.28    2.51
  -1  -3  -1  159.57    3.46
   1   3  -1  162.32    6.10
   1   3   1  162.82    6.39
   1   3   1  158.93    3.38
  -1   3   1  157.08    5.05
   1   3  -1  155.07    3.56
  -1   3  -1  151.07    4.99
   2  -3   1  461.30    8.64
   2   3   1  445.10    8.02
   2   3  -1  457.36   10.51
  -2   3   1  441.58    8.58
   2   3   1  436.75   10.54
   2   3  -1  439.89    8.11
   2  -3  -1  463.15    8.29
   3   3  -1  138.74    4.01
   3   3   1  138.99    6.68
   3   3  -1  123.76    6.38
   3   3   1  141.52    3.89
   3  -3  -1  136.17    3.62
   3  -3  -1  138.56    4.16
   3  -3   1  135.11    4.17
   3  -3   1  138.60    3.87
   4   3   1  514.30    9.77
   4  -3   1  521.39    9.51
   4   3   1  511.95   12.22
   4  -3   1  516.65   10.04
   4   3  -1  518.82    9.82
   4   3  -1  521.41   11.97
   4  -3  -1  520.25   10.03
   4  -3  -1  530.54    9.25
   5   3  -1  264.43    8.49
   5  -3   1  266.17    6.58
   5  -3  -1  268.88    5.82
   5   3  -1  255.97    6.37
   5   3   1  245.60    6.23
   5  -3  -1  245.00    6.22
   5  -3   1  250.34    6.04
   5   3   1  241.91    8.62
   6  -3   1  357.62    8.36
   6   3   1  350.76   10.62
   6   3  -1  366.56    8.42
   6   3  -1  371.38   10.41
   6  -3  -1  394.32    8.02
   6   3   1  350.33    8.29
   6  -3  -1  375.68    8.55
   6  -3   1  375.29    8.25
   7  -3   1  496.66   10.53
   7   3   1  480.32   12.82
   7   3   1  467.02   10.43
   7  -3   1  472.60   10.62
   7   3  -1  494.66   10.64
   7   3  -1  476.36   12.47
   7  -3  -1  481.47   10.64
   8   3  -1   12.30    3.21
   8  -3  -1   15.47    3.38
   8   3  -1   13.92    4.55
   8  -3   1   15.42    3.25
   8   3   1    6.87    4.61
   8   3   1   12.99    3.24
   9   3   1   -1.50    3.24
   9  -3   1    0.05    3.23
   9  -3  -1    4.86    3.00
   9   3  -1    0.77    3.27
  10  -3  -1  184.22    7.34
  10   3   1  204.76    7.44
  10   3  -1  186.70    7.04
  10  -3   1  209.63    7.60
  11  -3   1   87.30    6.01
  11  -3  -1   82.49    5.89
  11   3  -1   91.12    6.07
  11   3   1  100.11    6.09
  12  -3   1   33.90    4.97
  12   3  -1   46.02    5.33
  12  -3  -1   29.51    4.56
  12   3   1   34.26    4.97
  13  -3  -1    5.36    4.54
  13   3   1   10.99    4.64
  13   3  -1    1.52    4.57
  13  -3   1    8.62    4.56
   0   4  -1  472.17   10.60
   0  -4  -1  478.13    8.58
   0   4   1  463.90   10.58
  -1  -4   1  116.91    2.72
   1   4   1  110.34    3.07
  -1   4  -1  106.01    5.18
   1   4  -1  105.08    3.35
  -1   4   1  121.19    5.57
   1   4  -1  113.54    6.12
  -1  -4  -1  109.36    3.10
   1   4   1  105.11    6.27
  -2   4   1   31.45    2.83
   2   4   1   29.98    4.09
  -2   4  -1   26.72    2.67
   2   4  -1   30.22    4.03
   2   4   1   29.00    1.86
   2   4  -1   34.14    2.06
   3  -4  -1   15.20    2.06
   3  -4   1   11.76    2.08
   3   4   1   16.34    1.86
   3   4  -1   16.16    1.93
   3   4   1   22.27    4.03
   3  -4   1   14.04    2.03
   3   4  -1   12.19    3.75
   3  -4  -1   16.55    1.87
   4   4   1  351.22    7.35
   4  -4  -1  357.05    7.62
   4   4   1  352.85   10.22
   4   4  -1  352.55   10.08
   4   4  -1  349.14    7.40
   4  -4   1  342.73    7.48
   4  -4  -1  358.91    6.88
   4  -4   1  350.61    7.07
   5  -4  -1  385.32    7.39
   5   4  -1  365.40   10.54
   5  -4   1  374.23    7.65
   5   4   1  360.85   10.84
   5  -4  -1  379.42    8.23
   5   4  -1  379.33    8.21
   5  -4   1  377.96    8.24
   5   4   1  372.37    8.09
   6   4  -1   -3.44    3.77
   6  -4   1    1.07    1.98
   6  -4  -1    3.81    1.87
   6   4   1   -2.86    2.23
   6   4  -1    2.25    2.48
   6  -4   1    3.08    2.41
   6   4   1    0.12    3.97
   6  -4  -1    3.01    2.40
   7   4  -1   62.42    4.28
   7   4   1   53.49    5.64
   7  -4  -1   55.11    4.21
   7   4  -1   55.10    5.56
   7   4   1   54.11    3.73
   7  -4   1   53.81    3.85
   8   4   1  319.66    8.52
   8  -4   1  333.14    8.83
   8   4  -1  324.68    8.65
   8   4   1  308.29   11.07
   8   4  -1  330.18   10.98
   8  -4  -1  307.33    8.61
   9   4  -1    0.14    3.25
   9   4   1    4.65    3.33
   9  -4   1    4.38    2.92
   9  -4  -1    0.57    3.23
  10   4  -1   23.59    4.12
  10  -4   1    5.06    3.26
  10   4   1   13.21    3.74
  10  -4  -1   17.10    3.86
  11  -4   1   63.69    5.38
  11   4  -1   62.46    5.00
  11  -4  -1   65.64    5.08
  11   4   1   68.37    5.20
  12   4  -1    6.40    4.11
  12  -4   1   -0.14    3.74
  12  -4  -1    6.96    4.22
  12   4   1    5.25    4.28
  13   4   1    3.32    4.51
  13  -4  -1   -1.53    4.26
  13  -4   1    6.69    4.57
  13   4  -1    7.45    4.83
   0   5   1   -5.78    3.32
   0   5  -1   -0.17    3.30
   0  -5  -1    0.15    1.60
  -1   5  -1  235.42    7.33
   1   5   1  230.98    8.44
  -1  -5  -1  240.07    4.92
   1   5  -1  232.22    5.13
   1   5   1  232.72    4.90
  -1  -5   1  241.29    4.66
   1   5  -1  223.51    8.14
  -1   5   1  230.22    7.41
   2   5  -1  850.12   14.34
   2   5   1  841.30   14.14
   2   5  -1  853.04   17.25
   2   5   1  825.06   17.39
  -2   5  -1  837.92   15.68
  -2   5   1  842.54   15.72
   3   5  -1   52.63    2.97
   3   5  -1   59.20    5.04
   3  -5  -1   51.86    3.20
   3   5   1   50.48    2.97
   3  -5   1   60.01    3.78
   3   5   1   57.75    5.17
   4   5   1   45.78    5.13
   4  -5   1   46.51    3.16
   4   5  -1   45.83    4.99
   4  -5   1   44.88    3.06
   4  -5  -1   46.38    3.06
   4  -5  -1   47.40    3.01
   4   5  -1   47.40    3.15
   4   5   1   51.81    3.02
   5   5  -1   97.88    7.18
   5  -5   1   94.84    4.28
   5   5   1   99.11    7.32
   5  -5  -1   92.70    4.22
   5  -5  -1   99.20    3.45
   5  -5   1   93.59    3.66
   5   5   1   98.58    4.21
   5   5  -1   97.57    4.10
   6   5   1  165.04    8.55
   6  -5   1  178.35    5.07
   6   5  -1  173.17    8.46
   6   5   1  166.36    5.48
   6  -5  -1  184.99    5.84
   6  -5  -1  183.80    4.86
   6  -5   1  172.20    5.73
   6   5  -1  168.40    5.58
   7   5   1  220.55    6.57
   7   5  -1  214.97    9.42
   7   5   1  210.61    9.54
   7  -5   1  207.92    6.44
   7   5  -1  219.48    6.70
   7  -5  -1  209.59    6.70
   8  -5  -1   25.44    3.66
   8  -5   1   28.29    3.62
   8   5  -1   28.15    3.67
   8   5   1   28.01    5.62
   8   5  -1   36.73    5.85
   8   5   1   25.68    3.49
   9  -5   1  121.75    6.08
   9   5  -1  135.66    6.17
   9  -5  -1  125.52    6.04
   9   5   1  117.03    5.80
  10   5  -1    4.06    3.69
  10  -5  -1   11.81    3.81
  10  -5   1    8.20    3.24
  10   5   1   12.29    3.83
  11  -5  -1   19.97    4.35
  11   5   1   22.87    4.46
  11  -5   1   20.25    4.34
  11   5  -1   26.39    4.49
  12   5   1    6.56    4.66
  12   5  -1   -0.73    4.30
  12  -5  -1    3.84    4.25
  12  -5   1    2.08    4.22
  13  -5   1    3.92    4.11
  13  -5  -1   -0.35    4.32
  13   5  -1    2.97    4.73
  13   5   1   -0.08    4.56
   0   6  -1   43.24    4.44
   0  -6  -1   39.63    2.70
   0   6   1   36.85    4.40
  -1  -6   1  245.11    4.95
  -1   6  -1  240.50    7.85
   1   6  -1  234.90    5.27
   1   6   1  236.59    8.75
  -1   6   1  231.25    7.89
  -1  -6  -1  250.52    5.19
   1   6  -1  236.82    8.54
   1   6   1  229.55    5.12
   2   6   1  123.99    3.59
   2   6  -1  106.62    7.41
   2   6  -1  122.64    3.76
  -2   6   1  110.90    5.62
  -2   6  -1  117.67    5.80
   2   6   1  100.46    7.18
  -3   6   1   52.00    3.46
   3   6  -1   47.29    5.03
   3   6   1   40.04    5.04
   3   6  -1   39.23    2.85
   3   6   1   45.51    2.73
   4  -6  -1 1551.04   25.82
   4  -6   1 1539.90   25.83
   4  -6  -1 1588.30   25.74
   4   6  -1 1520.74   29.02
   4  -6   1 1556.72   25.75
   4   6   1 1510.35   29.05
   4   6   1 1493.32   25.27
   4   6  -1 1503.56   25.45
   5  -6  -1   39.76    3.01
   5  -6  -1   49.57    3.65
   5   6   1   48.96    3.58
   5   6  -1   49.24    3.21
   5  -6   1   42.44    3.27
   5  -6   1   42.52    3.18
   5   6   1   44.34    5.57
   5   6  -1   47.24    5.45
   6  -6   1   64.72    4.16
   6  -6   1   62.11    3.50
   6   6  -1   57.96    3.90
   6  -6  -1   55.94    3.22
   6   6   1   62.82    6.20
   6   6   1   58.21    3.84
   6  -6  -1   58.79    4.00
   6   6  -1   56.64    5.96
   7   6   1  207.21    9.85
   7  -6  -1  212.04    6.70
   7   6  -1  205.58    9.75
   7   6  -1  213.94    6.64
   7  -6   1  217.19    6.84
   7   6   1  201.47    6.43
   8   6  -1   32.51    3.76
   8   6  -1   39.93    6.18
   8  -6  -1   32.85    3.48
   8   6   1   24.88    5.88
   8   6   1   35.65    3.86
   8  -6   1   31.50    3.86
   9   6  -1   96.33    5.58
   9   6   1  102.87    5.58
   9  -6  -1  103.45    5.75
   9  -6   1   92.58    5.56
   9   6   1  110.63    8.37
  10   6   1  130.86    6.44
  10  -6   1  126.90    6.42
  10   6  -1  132.82    6.53
  10  -6  -1  137.64    6.28
  11   6  -1  135.51    6.91
  11  -6   1  111.96    6.66
  11  -6  -1  133.31    6.81
  11   6   1  122.20    6.72
  12   6   1   88.48    6.53
  12   6  -1  115.93    7.01
  12  -6  -1  109.87    6.91
  12  -6   1  110.44    6.83
  13  -6   1  134.32    7.40
  13  -6  -1  136.09    7.72
  13   6  -1  149.27    8.31
  13   6   1  147.51    7.93
   0   7   1    2.04    3.67
   0  -7  -1   -1.31    1.60
   0   7  -1   -8.98    3.31
  -1  -7   1   95.67    2.99
  -1   7   1   79.44    6.18
   1   7  -1   89.67    6.87
   1   7   1   90.04    6.92
  -1   7  -1   86.86    6.13
   1   7  -1   83.54    3.46
  -1  -7  -1   98.43    3.29
  -2  -7   1  998.12   16.41
   2   7   1  984.26   16.56
  -2  -7  -1  994.29   16.66
   2   7  -1  963.52   20.37
   2   7   1  958.36   20.34
   2   7  -1  958.38   16.66
  -2   7  -1  951.07   18.80
  -2   7   1  988.73   18.88
   3   7  -1  503.53    9.91
   3   7   1  515.66   13.83
  -3   7   1  513.91   11.44
  -3   7  -1  526.60   11.52
   3   7   1  519.21    9.81
   3   7  -1  540.07   13.97
   4  -7  -1   70.67    3.76
   4   7   1   73.67    6.31
   4   7  -1   68.96    6.07
   4   7  -1   73.82    3.58
   4  -7   1   64.40    4.27
   4  -7  -1   63.38    4.30
   4   7   1   71.03    3.58
   5   7  -1  534.29   14.53
   5  -7   1  524.90   10.52
   5   7   1  510.47   14.42
   5   7   1  520.57   10.53
   5  -7  -1  508.64   10.38
   5  -7  -1  534.30   10.87
   5  -7   1  522.34   10.78
   5   7  -1  506.36   10.54
   6  -7  -1  100.63    4.78
   6  -7   1  100.97    4.53
   6   7   1  110.80    7.53
   6   7  -1  105.29    4.66
   6   7   1  104.86    4.78
   6  -7   1  101.89    4.23
   6   7  -1  109.80    7.46
   6  -7  -1  105.25    4.06
   7  -7  -1    7.87    2.99
   7   7  -1   -3.14    4.77
   7   7  -1    5.68    2.93
   7   7   1    5.80    3.01
   7  -7   1    4.53    2.85
   7   7   1    6.29    5.24
   8   7   1   80.28    5.21
   8  -7  -1   82.19    4.76
   8  -7   1   79.15    5.08
   8   7   1   86.16    7.77
   8   7  -1   82.95    5.05
   8   7  -1   77.05    7.44
   9   7   1   -2.38    5.55
   9   7   1   -1.06    3.26
   9  -7   1   -2.44    2.78
   9   7  -1    5.02    3.45
   9   7  -1    9.39    5.94
   9  -7  -1    0.83    3.23
  10   7   1  150.32    6.79
  10  -7  -1  136.49    6.65
  10  -7   1  158.50    6.97
  10   7  -1  149.69    6.87
  11  -7   1   -1.50    3.75
  11  -7  -1    2.74    3.99
  11   7   1   10.45    4.51
  11   7  -1   -0.41    4.20
  12  -7   1   13.02    4.59
  12  -7  -1    9.80    4.50
  12   7   1   22.29    4.80
   0   8  -1   88.81    6.71
   0  -8   1   73.40    3.27
   0   8   1   76.95    5.75
   0  -8  -1   75.27    3.31
  -1   8  -1   11.82    3.82
   1   8   1    6.90    4.21
  -1  -8   1    9.95    1.63
  -1   8   1   12.08    3.90
  -1  -8  -1   10.09    1.83
   1   8  -1    9.36    4.24
  -2  -8   1  268.80    5.38
   2   8   1  260.98   10.01
  -2   8   1  245.70    8.47
   2   8  -1  254.57    6.02
   2   8   1  260.64    5.98
  -2   8  -1  247.18    8.46
  -2  -8  -1  261.01    5.66
   2   8  -1  260.11   10.16
   3   8  -1  365.38   11.86
  -3   8   1  364.30    9.75
   3   8  -1  361.14    7.75
   3   8   1  360.68    7.69
   3   8   1  367.37   12.09
  -3   8  -1  346.60    9.47
   4  -8  -1 1010.16   17.71
   4   8  -1  952.10   21.58
   4   8   1  990.68   17.37
   4   8  -1 1000.14   17.46
   4   8   1  958.36   21.72
   4  -8   1  996.68   18.54
   5   8   1   16.33    5.24
   5  -8   1    6.41    2.47
   5  -8  -1    4.79    2.39
   5  -8  -1    4.90    2.42
   5   8  -1    2.47    4.79
   5   8  -1    8.37    2.41
   5   8   1    4.12    2.45
   5  -8   1    6.74    2.44
   6   8  -1    3.37    2.60
   6   8   1    2.16    2.48
   6  -8   1    1.03    2.55
   6   8   1    2.14    5.11
   6  -8  -1    3.15    2.70
   6  -8   1    5.52    2.33
   6   8  -1    6.60    5.08
   6  -8  -1    2.80    2.12
   7  -8   1    1.67    2.86
   7  -8  -1    3.65    2.90
   7   8  -1   -3.65    2.78
   7   8  -1   -3.30    5.16
   7   8   1    3.20    2.80
   7   8   1   -2.29    5.25
   8   8  -1  215.56   10.87
   8  -8   1  181.85    6.69
   8   8   1  184.43   10.73
   8   8   1  183.82    6.75
   8   8  -1  200.94    6.96
   8  -8  -1  200.96    7.05
   9   8   1   79.64    5.62
   9   8  -1   81.25    5.45
   9  -8   1   71.48    5.10
   9   8   1  100.95    8.62
   9  -8  -1   67.75    5.09
   9   8  -1   71.96    7.88
  10   8  -1   29.82    4.52
  10  -8   1   19.06    4.07
  10  -8  -1   17.53    4.20
  10   8   1   21.36    4.60
  11   8  -1   11.16    4.72
  11  -8  -1    5.31    3.90
  11  -8   1   -1.47    3.95
  11   8   1   15.39    4.51
  12  -8   1   75.34    6.24
  12   8  -1   74.54    6.31
  12   8   1   82.64    6.64
  12  -8  -1   75.06    6.12
   0   9  -1   -1.72    3.89
   0  -9   1    1.42    1.74
   0   9   1   -3.81    3.84
   0  -9  -1    1.21    1.91
  -1   9  -1   57.29    5.27
  -1  -9  -1   53.15    3.03
   1   9  -1   51.51    5.61
  -1   9   1   51.76    5.19
   1   9   1   47.05    5.63
  -1  -9   1   52.38    2.82
  -2  -9   1   37.51    2.47
   2   9   1   37.33    2.62
  -2  -9  -1   40.43    2.58
  -2   9  -1   32.32    4.33
   2   9  -1   31.19    5.34
   2   9   1   31.16    5.35
   2   9  -1   34.21    2.58
  -2   9   1   40.15    4.56
  -3   9  -1   79.06    5.88
  -3   9   1   82.74    5.31
   3   9  -1   77.96    3.96
   3   9   1   73.20    6.67
   3   9  -1   71.75    6.55
   3   9   1   75.78    3.73
   4   9   1   29.53    2.85
  -4   9   1   24.78    3.55
   4   9  -1   23.87    5.43
   4   9  -1   30.15    2.98
   4   9   1   28.54    5.75
   5  -9   1   67.29    4.69
   5  -9  -1   67.19    4.71
   5   9  -1   65.21    6.79
   5   9   1   67.99    7.13
   5  -9   1   69.55    4.27
   5   9  -1   72.14    4.02
   5  -9  -1   69.91    4.20
   5   9   1   73.69    4.22
   6   9   1  261.41    7.07
   6  -9   1  258.35    7.13
   6   9  -1  273.65    7.46
   6  -9  -1  256.27    7.46
   6   9  -1  258.08   11.42
   6  -9   1  264.30    7.53
   6   9   1  263.41   11.83
   7   9  -1  171.74   10.42
   7  -9   1  199.13    6.81
   7   9   1  186.21    6.36
   7   9  -1  176.59    6.38
   7  -9  -1  188.18    6.63
   7   9   1  199.58   10.96
   8   9   1   59.49    7.67
   8  -9   1   69.21    4.99
   8   9  -1   51.57    7.48
   8   9  -1   61.61    4.65
   8   9   1   66.47    5.05
   8  -9  -1   62.05    4.69
   9  -9  -1    9.39    3.52
   9  -9   1    8.63    3.48
   9   9   1    8.55    6.57
   9   9  -1   12.49    3.89
   9   9   1    7.98    3.81
   9   9  -1   -4.98    5.93
  10   9  -1   84.40    5.89
  10   9   1   73.75    5.69
  10  -9   1   69.04    5.39
  10  -9  -1   74.90    5.43
  11   9   1    3.28    4.31
  11   9  -1    4.04    4.42
  11  -9   1    1.32    3.95
  11  -9  -1    7.82    4.19
  12  -9   1  148.69    7.86
  12   9   1  146.46    7.82
  12   9  -1  163.67    8.12
  12  -9  -1  154.72    7.95
   0 -10  -1 1975.05   32.83
   0 -10   1 1930.40   32.64
   0  10   1 1918.32   36.24
   0  10  -1 1975.75   36.30
   1  10   1    9.85    4.93
   1  10  -1   16.79    4.82
  -1 -10   1   13.93    1.92
  -1  10  -1   12.35    4.31
  -1  10   1   13.49    4.42
  -1 -10  -1   11.29    2.10
   2  10   1   11.07    2.26
  -2 -10  -1    9.03    1.95
  -2  10   1   15.68    4.09
   2  10  -1    9.68    2.23
   2  10  -1    6.81    4.78
  -2 -10   1    7.60    1.75
  -2  10  -1    9.04    4.00
   2  10   1    6.90    4.82
  -3  10  -1   35.21    4.46
   3  10  -1   41.87    3.16
   3  10  -1   28.95    5.84
   3  10   1   38.52    6.06
   3  10   1   32.38    2.84
  -3  10   1   40.87    4.65
  -4  10   1  116.16    6.47
   4  10  -1  117.37    9.00
   4  10   1  123.44    4.73
   4  10  -1  127.42    4.92
   4  10   1  118.81    8.94
   5  10   1   32.16    6.46
   5  10  -1   44.04    3.64
   5 -10   1   35.69    3.44
   5  10   1   45.79    3.50
   5  10  -1   48.29    6.69
   5 -10  -1   43.76    3.50
   5 -10  -1   44.65    4.02
   5 -10   1   44.85    4.02
   6  10  -1   85.07    7.97
   6 -10  -1   66.81    4.60
   6  10  -1   80.97    4.91
   6  10   1   87.57    4.84
   6  10   1   70.07    7.79
   6 -10   1   76.29    4.76
   6 -10   1   69.53    4.74
   7  10  -1   17.47    6.39
   7  10   1   26.69    6.75
   7  10   1   19.11    3.34
   7 -10   1   23.81    3.60
   7  10  -1   20.77    3.73
   7 -10  -1   21.79    3.61
   8  10   1    6.94    3.27
   8  10  -1   11.59    6.45
   8 -10  -1   -0.07    3.11
   8 -10   1    3.65    3.33
   8  10   1    1.71    6.39
   8  10  -1    4.62    3.35
   9 -10   1   -1.04    3.37
   9 -10  -1   -2.75    3.43
   9  10   1    1.52    6.45
   9  10   1    9.40    3.98
   9  10  -1   -2.89    6.24
   9  10  -1    0.61    3.80
  10 -10   1    1.38    3.75
  10  10   1    0.55    3.86
  10  10  -1    1.64    4.04
  10 -10  -1   -3.07    3.65
  11 -10   1   89.18    6.39
  11  10   1   85.89    6.38
  11 -10  -1   91.48    6.37
  11  10  -1   85.69    6.47
  12 -10   1   15.25    4.76
  12 -10  -1   13.72    4.78
   0  11   1   -0.68    4.42
   0  11  -1    3.76    4.46
   0 -11   1    2.11    2.04
   0 -11  -1   -1.39    2.10
  -1  11  -1  149.56    8.42
   1  11   1  157.86    9.16
  -1 -11   1  162.83    4.66
  -1  11   1  148.94    8.38
   1  11  -1  148.31    8.92
  -1 -11  -1  162.45    4.83
   1 -11  -1  155.62    5.27
  -2 -11  -1   41.49    3.08
   2  11  -1   31.97    5.89
  -2 -11   1   38.60    2.72
  -2  11  -1   39.77    5.16
   2  11   1   38.66    6.22
  -2  11   1   42.16    5.22
  -3  11  -1    9.46    3.95
  -3  11   1    6.84    3.87
   3  11  -1    4.03    2.35
   3  11   1    6.21    5.28
   3  11   1    2.42    2.36
   3  11  -1    5.12    5.23
   4  11   1  293.86   12.44
   4  11  -1  303.96   12.41
  -4  11   1  299.88    9.78
   4  11  -1  308.52    7.80
   4  11   1  297.37    7.56
  -4  11  -1  325.94    9.95
   5  11  -1   47.97    3.84
   5 -11  -1   44.37    4.34
   5 -11   1   38.81    3.66
   5 -11   1   43.41    4.35
   5 -11  -1   43.92    3.66
   5  11   1   48.00    6.99
   5  11   1   42.19    3.58
   5  11  -1   42.42    7.05
   6  11  -1   24.27    6.54
   6  11  -1   21.67    3.53
   6 -11  -1   23.42    3.52
   6  11   1   26.49    3.32
   6  11   1   13.08    6.46
   6 -11   1   15.30    3.26
   7 -11   1  148.13    6.27
   7  11   1  151.07    5.98
   7 -11  -1  139.25    6.12
   7  11   1  149.94   10.66
   7  11  -1  158.20   10.61
   7  11  -1  140.29    5.96
   8  11  -1  171.22    6.77
   8  11   1  177.09    6.89
   8  11   1  166.26   11.30
   8 -11  -1  172.57    6.91
   8 -11   1  181.13    7.04
   8  11  -1  170.56   11.24
   9  11   1   37.52    4.43
   9 -11   1   30.21    4.39
   9  11   1   28.91    7.83
   9  11  -1   33.03    4.52
   9  11  -1   27.09    7.63
   9 -11  -1   24.15    4.10
  10 -11   1   95.16    6.18
  10  11  -1   84.77    6.08
  10 -11  -1   79.27    5.91
  10  11   1   92.89    6.44
  11  11   1   21.28    5.29
  11 -11  -1   17.19    4.54
  11  11  -1   10.76    5.11
  11 -11   1   13.99    4.43
   0 -12   1    9.29    2.26
   0  12   1   12.94    5.11
   0  12  -1   11.96    4.97
   0 -12  -1   10.23    2.40
  -1 -12   1  231.99    5.95
   1  12  -1  251.09   10.94
  -1  12  -1  237.09   10.23
   1  12   1  244.79   10.91
  -1  12   1  242.64   10.27
   1 -12  -1  246.14    6.81
  -1 -12  -1  247.44    6.28
   1 -12   1  239.25    6.60
   2  12   1  591.23   17.07
  -2  12   1  597.83   15.61
   2  12  -1  610.81   17.03
  -2  12  -1  595.97   15.47
  -3  12   1  237.43    9.63
   3  12  -1  249.13    6.65
   3  12   1  237.48   11.56
  -3  12  -1  252.21    9.62
   3  12  -1  240.26   11.31
   3  12   1  232.38    6.50
   4  12  -1  256.75   12.01
   4  12   1  246.11    6.83
  -4  12  -1  235.42    9.27
   4  12  -1  244.86    6.86
  -4  12   1  264.36    9.49
   4  12   1  234.05   11.69
   5 -12  -1    4.21    3.64
   5  12  -1   -1.53    5.74
   5  12  -1    0.14    2.94
   5 -12  -1   -0.30    2.92
   5  12   1    1.43    2.83
   5  12   1    3.25    6.07
   5 -12   1    4.00    3.57
   6 -12  -1  146.55    5.93
   6  12  -1  132.32    9.85
   6 -12   1  128.84    5.85
   6  12   1  140.59   10.15
   6  12  -1  129.17    5.64
   6  12   1  128.71    5.45
   7  12   1  -12.33    5.98
   7  12   1    1.55    3.27
   7 -12   1   -3.58    2.92
   7 -12  -1   -2.95    3.01
   7  12  -1    3.23    3.24
   7  12  -1    5.14    6.54
   8  12   1   16.13    7.39
   8 -12   1   21.18    3.98
   8  12  -1   17.26    7.21
   8 -12  -1   21.91    3.90
   8  12   1   19.06    4.07
   8  12  -1   27.33    4.07
   9  12   1    6.26    7.18
   9 -12   1   -1.87    3.51
   9  12  -1  -12.31    6.55
   9 -12  -1    1.15    3.52
   9  12   1   -2.81    3.65
   9  12  -1    4.64    4.18
  10 -12   1  101.29    6.08
  10  12   1   94.44   10.20
  10 -12  -1   97.36    6.33
  10  12  -1   97.37    6.75
  11 -12  -1   21.94    4.78
  11  12  -1   19.97    5.11
  11 -12   1   16.10    4.48
   0  13  -1   -2.41    4.79
   0 -13   1   -0.99    2.32
   0  13   1   -5.62    4.72
   0 -13  -1   -0.54    2.34
   1 -13  -1    5.83    2.66
   1  13  -1    6.30    5.43
   1  13   1    5.67    5.41
  -1  13   1    8.76    5.08
  -1  13  -1   12.14    5.08
   1 -13   1   12.72    2.92
   2  13   1    4.90    5.49
  -2  13   1   10.90    4.80
   2  13  -1    0.09    5.41
  -2  13  -1    6.01    4.58
   3  13  -1    5.45    5.83
   3  13   1   -0.12    5.67
  -3  13   1    0.77    4.31
  -3  13  -1    6.95    4.39
  -4  13  -1   93.07    6.65
   4  13   1   87.01    4.68
  -4  13   1   92.57    6.53
   4  13  -1   91.34    4.86
   4  13   1   87.28    8.77
   4  13  -1   84.78    8.44
   5 -13   1   19.87    4.26
   5  13   1   25.94    7.23
   5 -13  -1   20.82    3.36
   5  13   1   23.13    3.45
   5  13  -1   14.33    3.48
   5  13  -1   25.84    6.94
   6 -13   1   82.43    5.12
   6  13  -1   89.17    9.08
   6  13   1   70.51    8.75
   6  13   1   77.78    5.04
   6  13  -1   89.36    5.39
   6 -13  -1   74.89    4.94
   7  13   1  243.18    7.91
   7 -13   1  258.41    8.20
   7 -13  -1  241.30    7.95
   7  13  -1  248.58    8.13
   7  13   1  250.23   13.17
   7  13  -1  222.82   12.67
   8  13   1   24.75    7.87
   8  13  -1   28.76    4.23
   8 -13  -1   29.12    4.18
   8 -13   1   26.09    4.16
   8  13  -1   21.47    7.86
   9  13  -1   49.22    8.90
   9 -13   1   61.83    5.28
   9  13   1   64.21    9.46
   9  13  -1   64.14    5.36
   9 -13  -1   54.39    5.11
  10 -13  -1   66.98    5.62
  10 -13   1   65.67    5.67
  10  13   1   66.56    9.61
   0  14  -1  160.23   10.05
   0  14   1  204.58   10.57
   1  14  -1   -1.36    5.28
  -1  14  -1   -3.85    4.80
   1  14   1    5.97    5.60
   1 -14   1   -2.89    2.53
  -1  14   1   -2.77    4.93
   1 -14  -1   -0.12    2.68
   2 -14  -1   10.33    3.34
   2  14   1   13.28    6.06
   2  14  -1    9.11    5.83
  -2  14  -1    3.86    4.83
  -2  14   1   12.96    5.28
   3  14   1   26.10    6.76
  -3  14   1   45.36    6.02
   3  14  -1   35.92    7.14
  -3  14  -1   28.60    5.50
   4  14   1   -1.23    2.87
  -4  14  -1   -0.11    4.42
  -4  14   1    4.22    4.51
   4  14  -1   -1.04    3.03
   4  14  -1    1.37    6.20
   4  14   1   15.98    6.67
   5 -14   1   75.98    6.01
   5  14  -1   84.29    9.00
   5  14   1   99.35    5.13
   5  14  -1   74.19    5.10
   5 -14  -1   79.82    5.12
   5  14   1   84.52    9.21
   6  14  -1  146.96   11.17
   6  14  -1  148.20    6.43
   6  14   1  131.76   10.63
   6 -14   1  136.94    6.18
   6 -14  -1  138.45    6.13
   7 -14   1    4.87    3.48
   7  14   1  -10.09    6.66
   7 -14  -1    5.62    3.41
   7  14  -1   -0.73    6.77
   8 -14  -1  128.98    6.68
   8  14  -1  129.69   10.87
   8 -14   1  125.90    6.51
   8  14   1  131.00   11.23
   9 -14   1  188.52    8.06
   9 -14  -1  209.82    8.11
   9  14   1  171.15   12.79
   9  14  -1  203.69   12.90
  10  14  -1   16.54    8.09
  10  14   1   19.02    8.60
  10 -14  -1   11.32    4.22
  10 -14   1   19.01    4.57
   0  15   1    5.51    5.60
   0  15  -1    4.58    5.53
   1  15  -1  245.47   11.93
   1  15   1  250.97   12.16
  -1  15  -1  239.36   11.44
  -1  15   1  235.38   11.30
  -2  15  -1  284.18   11.92
   2  15   1  271.97   13.01
  -2  15   1  272.61   11.80
   2 -15  -1  291.13    8.40
   2  15  -1  285.73   12.95
   2 -15   1  287.33    8.30
  -3  15  -1    4.67    4.94
   3  15   1    4.31    6.38
  -3  15   1   -5.04    4.78
   3  15  -1    0.05    6.14
  -4  15   1    0.55    4.65
  -4  15  -1    3.25    4.71
   4  15   1   -1.12    6.25
   4  15  -1    9.82    6.70
   5  15   1   -2.36    6.56
   5 -15  -1    3.34    3.07
   5 -15   1    5.86    4.31
   5  15  -1   12.84    6.91
   6 -15   1   52.52    4.71
   6  15   1   38.82    8.50
   6  15  -1   63.50    8.88
   6 -15  -1   54.84    4.48
   7 -15  -1    6.63    3.76
   7  15   1    9.30    7.54
   7  15  -1    4.45    7.09
   7 -15   1   11.91    3.98
   8 -15   1   17.69    4.14
   8 -15  -1   15.61    3.99
   8  15   1   19.18    8.17
   8  15  -1   14.06    7.68
   9  15   1   23.12    8.53
   9 -15   1   30.83    4.70
   9  15  -1   19.64    8.23
   9 -15  -1   30.50    4.61
   0  16   1 1161.96   27.41
   0  16  -1 1164.52   27.38
  -1  16  -1   10.28    5.98
  -1  16   1   18.98    6.24
   1  16   1    9.57    6.28
   1  16  -1    0.32    5.95
  -2  16   1   18.03    6.03
  -2  16  -1   11.30    5.76
   2  16  -1   11.24    6.46
   2  16   1   26.70    7.17
  -3  16   1  224.80   10.88
   3  16   1  204.61   12.14
   3 -16  -1  210.18    7.61
  -3  16  -1  242.94   11.00
   3  16  -1  211.28   12.13
  -4  16  -1    4.34    5.24
  -4  16   1    5.95    5.21
   4  16   1   21.31    7.26
   4  16  -1    1.70    6.55
   5 -16  -1   93.84    5.33
   5  16  -1   85.98    9.66
   5  16   1   87.17    9.71
   6  16  -1  140.01   11.43
   6 -16  -1  143.89    6.59
   6 -16   1  133.37    6.35
   6  16   1  145.96   11.45
   7 -16  -1   22.20    4.11
   7  16  -1   18.88    7.97
   7  16   1   10.44    7.91
   7 -16   1   21.54    4.10
   8 -16  -1   43.03    4.89
   8 -16   1   49.96    5.02
   8  16   1   53.08    9.49
   8  16  -1   50.96    9.37
   9  16  -1   28.72    8.92
   9  16   1   22.67    8.69
   9 -16  -1   12.89    4.36
   9 -16   1   14.87    4.36
   0  17   1    2.82    6.11
   0  17  -1   -8.28    5.65
   1  17   1   27.12    7.09
  -1  17   1   29.57    6.96
   1  17  -1   43.36    7.53
  -1  17  -1   17.75    6.56
   2  17   1  142.18   10.73
  -2  17   1  141.37   10.02
   2  17  -1  158.74   11.06
  -2  17  -1  149.52   10.20
  -3  17   1  108.24    8.75
   3  17  -1   93.66    9.65
   3  17   1   82.04    9.33
  -3  17  -1   97.37    8.30
  -4  17   1  -10.37    4.98
   4  17  -1   -0.74    6.72
   4  17   1    3.12    6.99
  -4  17  -1    0.03    5.23
   5  17  -1   52.08    8.91
   5 -17  -1   79.19    5.42
   5  17   1   75.40    9.77
   6  17  -1    2.56    7.52
   6 -17   1   11.68    4.00
   6 -17  -1    2.40    3.66
   6  17   1    9.71    7.80
   7  17  -1    5.79    7.65
   7 -17   1    1.72    3.62
   7 -17  -1    2.82    3.60
   7  17   1    2.16    7.80
   8  17   1   19.28    8.55
   8 -17  -1   17.22    4.35
   8 -17   1   11.82    4.14
   8  17  -1    3.60    8.07
   0  18   1  319.00   14.25
   0  18  -1  311.47   14.13
  -1  18  -1   87.07    8.72
   1  18  -1   84.90    9.30
  -1  18   1   83.09    9.02
   1  18   1   92.91    9.58
   2  18  -1  167.55   11.58
  -2  18   1  133.66   10.42
   2  18   1  147.74   11.18
  -2  18  -1  156.43   10.62
  -3  18  -1   12.98    6.30
   3  18  -1   12.86    7.32
  -3  18   1   20.46    6.61
   3  18   1   24.46    7.90
   4  18  -1   38.08    8.35
   4  18   1   45.77    8.97
  -4  18  -1   27.88    6.73
  -4  18   1   57.41    7.49
   5  18  -1   64.43    9.46
   5  18   1   62.36    9.70
   6  18   1   57.57    9.88
   6 -18   1   72.82    5.38
   6  18  -1   68.86    9.97
   7  18   1   25.80    8.84
   7 -18   1   26.10    4.43
   7  18  -1   34.85    9.05
   0  19   1    9.15    6.94
   0  19  -1   -1.71    6.59
   1  19   1   43.49    8.57
   1  19  -1   36.59    8.22
  -1  19   1   44.16    8.13
  -1  19  -1   36.42    7.76
   2  19   1  145.01   11.35
  -2  19  -1  131.65   10.24
   2  19  -1  127.07   10.88
  -2  19   1  120.09   10.01
   3  19  -1  103.96   10.35
  -3  19   1   97.43    9.13
  -3  19  -1  108.07    9.28
   3  19   1  106.50   10.37
  -4  19  -1    6.32    6.12
  -4  19   1    7.16    6.31
   4  19   1   14.14    7.67
   4  19  -1    8.63    7.48
   5  19   1    6.80    7.82
   5  19  -1    1.12    7.50
   6  19  -1    1.67    7.88
   6  19   1   -7.61    7.74
   0  20   1  139.72   11.25
   0  20  -1  158.23   11.79
  -1  20  -1   -3.09    6.66
  -1  20   1    4.14    6.71
   1  20  -1    6.69    7.20
   1  20   1   13.06    7.44
  -2  20  -1   17.99    7.24
  -2  20   1   36.30    7.77
   2  20   1   25.19    8.14
   2  20  -1   28.05    8.11
   3  20  -1    2.18    7.22
  -3  20   1   -5.72    6.18
  -3  20  -1    2.73    6.51
   3  20   1   -4.47    6.86
   4  20  -1   12.58    7.85
   4  20   1   19.80    7.95
   5  20   1    1.59    7.98
   5  20  -1   -2.60    7.62
   0  21  -1    1.31    7.05
   0  21   1  -13.31    6.72
   1  21   1   41.35    8.98
  -1  21   1   30.27    8.24
   1  21  -1   39.18    8.63
  -1  21  -1   39.87    8.49
  -2  21  -1    3.47    7.13
  -2  21   1    4.30    7.17
   2  21   1    3.84    7.64
   2  21  -1    6.84    7.53
  -3  21  -1   66.68    8.93
  -3  21   1   50.61    8.64
   3  21  -1   65.69    9.80
   3  21   1   62.77    9.90
   1   0   2 1538.43   24.73
   1   0  -2 1507.39   24.33
   1   0   2 1517.96   24.06
   2   0  -2 2419.50   37.55
   2   0   2 2426.66   38.52
   2   0   2 2345.23   37.49
   3   0   2 1091.34   18.83
   3   0   2 1103.88   18.00
   3   0  -2 1065.00   18.36
   3   0  -2 1091.50   18.00
   4   0   2  114.46    5.32
   4   0  -2  118.07    4.12
   4   0  -2  112.12    4.73
   4   0   2  111.91    4.03
   5   0  -2   42.96    3.32
   5   0  -2   37.77    2.91
   5   0   2   53.11    3.87
   5   0   2   40.93    3.01
   6   0   2  217.21    7.14
   6   0  -2  202.56    5.98
   6   0   2  204.15    5.76
   6   0  -2  191.95    6.46
   7   0   2  386.17    9.20
   7   0  -2  397.75    9.31
   7   0  -2  401.80    9.73
   7   0   2  415.55   10.50
   8   0   2   78.16    4.78
   8   0  -2   79.86    4.88
   9   0   2   53.63    4.49
   9   0  -2   47.66    4.32
  10   0   2  188.43    7.22
  10   0  -2  194.03    7.45
  11   0   2  113.15    5.96
  11   0  -2  110.41    6.37
  12   0   2   14.34    4.44
  12   0  -2   10.67    4.40
  13   0  -2    2.51    4.00
  13   0   2   -5.26    4.20
   0   1   2    0.12    1.11
   0  -1  -2    0.00    0.53
   0   1  -2   -0.36    0.57
   0   1  -2   -1.93    0.86
   1   1  -2 5409.91   89.62
   1  -1  -2 5748.30   89.94
   1   1   2 5647.02   90.29
   1  -1   2 5744.45   91.50
   1   1   2 5670.61   89.77
   1   1  -2 5663.33   90.94
   2   1   2 1445.21   22.76
   2  -1  -2 1455.89   22.83
   2   1  -2 1405.51   23.77
   2  -1   2 1436.94   22.85
   2   1   2 1425.56   24.08
   2   1  -2 1417.06   22.82
   3  -1  -2  294.75    6.17
   3   1   2  285.76    6.00
   3   1   2  285.16    7.64
   3   1  -2  279.06    7.09
   3  -1  -2  289.30    5.85
   3  -1   2  290.30    5.98
   3  -1   2  284.30    6.42
   3   1  -2  284.07    5.97
   4  -1  -2   60.19    3.07
   4   1   2   61.73    4.13
   4  -1  -2   58.56    3.54
   4   1  -2   52.33    3.00
   4  -1   2   55.09    4.08
   4   1   2   54.79    3.26
   4  -1   2   59.23    3.35
   4   1  -2   62.57    3.75
   5  -1   2   22.05    2.52
   5   1   2   26.29    3.70
   5   1   2   23.78    2.54
   5  -1  -2   24.53    2.40
   5  -1  -2   26.28    2.64
   5   1  -2   18.65    2.51
   5  -1   2   19.93    2.79
   5   1  -2   19.85    3.24
   6  -1  -2    0.85    2.45
   6   1   2    7.15    3.51
   6   1  -2   -2.66    2.98
   6  -1   2   -0.94    2.29
   6  -1   2    3.74    2.82
   6   1   2    3.34    2.38
   6  -1  -2    1.71    2.08
   6   1  -2   -0.27    2.06
   7  -1  -2   48.99    3.71
   7  -1  -2   43.52    3.32
   7   1  -2   50.80    3.74
   7   1   2   49.07    3.60
   7  -1   2   40.43    3.46
   7   1  -2   46.98    4.39
   7   1   2   54.05    4.81
   7  -1   2   51.83    4.27
   8  -1  -2  163.70    5.89
   8   1   2  165.97    6.08
   8  -1   2  164.54    6.16
   8   1  -2  152.49    6.11
   8   1   2  152.18    7.61
   9   1  -2  236.96    7.51
   9  -1  -2  244.64    7.56
   9  -1   2  245.23    7.80
   9   1   2  236.24    7.61
  10   1  -2    4.89    3.61
  10  -1  -2    7.53    3.61
  10   1   2    5.63    3.62
  10  -1   2    4.91    3.63
  11  -1   2   41.50    4.44
  11   1   2   44.43    4.82
  11   1  -2   37.43    4.70
  11  -1  -2   44.71    4.88
  12  -1   2   -2.46    3.96
  12   1   2   -1.78    3.53
  12   1  -2    2.08    3.76
  12  -1  -2   -0.20    3.96
  13   1   2  154.72    7.78
  13  -1  -2  150.72    7.71
  13  -1   2  135.33    7.54
  13   1  -2  148.88    7.80
   0   2   2  611.24   11.37
   0  -2  -2  609.73   10.58
   1   2   2  606.77   11.83
   1  -2   2  629.25   10.87
   1   2   2  615.79   10.10
   1   2  -2  630.08   11.63
   1   2  -2  604.59   10.25
   1  -2  -2  633.78   10.22
  -1   2   2  616.29   11.01
   2  -2   2 1204.15   19.53
   2   2  -2 1184.38   19.32
   2  -2  -2 1210.95   19.61
   2   2  -2 1181.76   20.72
   2   2   2 1178.88   21.01
   2   2   2 1194.61   19.17
   2  -2  -2 1211.77   19.33
   3   2  -2   37.00    2.90
   3  -2  -2   49.29    2.67
   3  -2  -2   45.70    2.04
   3   2  -2   36.73    3.56
   3   2   2   43.90    3.90
   3   2   2   34.52    2.67
   3  -2   2   40.39    3.00
   3  -2   2   42.25    2.81
   4  -2   2  206.59    5.25
   4  -2  -2  199.89    4.59
   4  -2   2  195.33    5.23
   4  -2  -2  195.53    5.02
   4   2  -2  200.86    6.71
   4   2   2  189.77    7.15
   4   2   2  193.87    5.05
   4   2  -2  199.26    5.05
   5   2   2  456.41   11.16
   5   2   2  439.09    9.08
   5  -2  -2  439.04    9.27
   5   2  -2  446.57    9.22
   5  -2   2  437.95    9.22
   5  -2   2  445.76    9.29
   5   2  -2  452.62   10.59
   5  -2  -2  462.85    8.79
   6  -2  -2   82.65    3.98
   6   2   2   92.15    4.21
   6  -2   2   94.43    4.88
   6   2   2   88.93    5.49
   6   2  -2   83.73    4.28
   6   2  -2   82.09    5.80
   6  -2  -2   82.82    4.26
   6  -2   2   83.39    4.23
   7   2  -2   55.66    4.83
   7  -2   2   67.44    4.30
   7   2   2   57.17    4.08
   7  -2   2   49.32    3.46
   7  -2  -2   55.53    3.83
   7   2   2   52.57    5.17
   7   2  -2   60.15    4.17
   8  -2  -2  420.55   10.20
   8   2   2  428.37   12.03
   8   2   2  417.23   10.06
   8  -2   2  417.42   10.17
   8   2  -2  445.52   10.29
   9   2   2  418.12   10.51
   9   2  -2  431.66   10.71
   9  -2  -2  431.99   10.74
   9  -2   2  434.49   10.55
  10  -2  -2  364.29   10.07
  10   2   2  363.34    9.98
  10  -2   2  346.49    9.98
  10   2  -2  379.01   10.22
  11   2   2   92.85    5.96
  11  -2  -2   76.80    5.79
  11   2  -2   85.53    5.84
  11  -2   2   87.68    5.96
  12  -2  -2   10.53    4.48
  12   2  -2   15.97    4.44
  12   2   2   10.80    4.34
  12  -2   2   16.66    4.49
  13  -2  -2   -7.64    4.01
  13   2   2   -5.27    4.27
  13  -2   2    3.29    4.31
  13   2  -2    0.12    4.30
   0   3  -2   -1.03    2.38
   0  -3  -2   -1.30    1.16
   0   3   2    0.50    2.68
   1   3  -2  698.70   11.80
  -1  -3  -2  723.95   12.12
   1   3  -2  718.58   13.67
  -1   3   2  718.45   13.04
   1   3   2  707.41   13.86
   1   3   2  698.20   11.54
  -1   3  -2  695.11   12.83
   2   3   2 1030.46   19.41
  -2   3   2 1040.13   17.72
   2   3   2 1039.95   17.02
   2   3  -2 1032.59   17.24
   2  -3   2 1071.86   17.75
   2   3  -2 1074.66   19.30
   2  -3  -2 1076.37   17.28
   3   3  -2  236.06    5.51
   3  -3   2  242.35    5.53
   3   3  -2  243.41    7.82
   3   3   2  245.45    5.39
   3  -3  -2  244.26    4.99
   3  -3   2  247.74    5.43
   3  -3  -2  250.03    5.63
   3   3   2  244.05    8.11
   4   3  -2    8.34    3.51
   4  -3   2    7.84    2.07
   4   3   2    6.04    3.65
   4  -3  -2    3.24    2.00
   4  -3   2    9.38    1.84
   4   3  -2   10.75    2.12
   4   3   2    5.90    1.84
   4  -3  -2   10.97    1.44
   5  -3   2  288.65    6.62
   5   3   2  278.55    6.63
   5   3  -2  274.83    6.63
   5   3  -2  281.79    8.79
   5   3   2  280.78    9.05
   5  -3  -2  286.59    6.89
   5  -3  -2  293.23    6.09
   5  -3   2  283.31    6.75
   6   3   2   34.31    2.96
   6   3  -2   33.61    3.09
   6  -3  -2   34.68    3.15
   6   3  -2   31.80    4.42
   6  -3   2   40.68    3.06
   6   3   2   42.39    4.84
   6  -3  -2   37.95    2.68
   6  -3   2   32.47    2.83
   7  -3  -2  208.70    6.57
   7  -3   2  212.55    6.78
   7   3   2  199.41    8.72
   7   3   2  225.59    6.48
   7  -3   2  214.52    6.55
   7   3  -2  199.05    6.41
   7   3  -2  213.71    8.37
   8   3   2   15.26    4.80
   8  -3   2   13.59    3.29
   8  -3  -2   10.07    2.90
   8   3   2   12.83    3.17
   8   3  -2   14.98    3.29
   8   3  -2    8.20    4.31
   9   3  -2  121.39    5.94
   9  -3  -2  124.40    5.97
   9  -3   2  123.71    5.98
   9   3   2  128.98    5.93
  10   3  -2   85.57    5.68
  10   3   2   87.13    5.56
  10  -3   2   75.98    5.49
  10  -3  -2   80.12    5.52
  11  -3   2  201.64    7.73
  11   3   2  212.13    7.96
  11   3  -2  220.66    8.16
  11  -3  -2  199.36    7.88
  12   3  -2   14.10    4.58
  12  -3   2    9.11    4.33
  12  -3  -2   14.43    4.49
  12   3   2    8.26    4.41
  13   3   2    5.97    4.66
  13  -3   2    5.41    4.53
  13   3  -2    6.68    4.68
  13  -3  -2   -0.78    4.32
   0   4  -2   12.96    3.12
   0  -4  -2   11.43    1.61
   0   4   2   12.03    3.34
   1   4   2  256.50    8.24
   1   4   2  260.94    5.09
  -1  -4  -2  270.85    5.42
  -1  -4   2  282.37    4.97
   1   4  -2  265.98    5.61
   1   4  -2  274.38    8.13
  -1   4  -2  263.13    7.24
  -1   4   2  267.23    7.49
   2   4  -2    4.12    1.73
   2   4  -2    1.92    3.41
   2   4   2    3.59    1.50
  -2   4   2    1.74    2.41
   2   4   2    3.46    3.66
   3  -4  -2  387.16    7.69
   3   4  -2  372.62   10.25
   3   4   2  382.70   10.57
   3  -4   2  381.26    7.78
   3  -4  -2  382.59    7.65
   3   4  -2  381.57    7.62
   3   4   2  381.11    7.31
   4   4  -2   24.54    4.15
   4  -4   2   25.31    2.29
   4   4   2   25.03    2.24
   4   4  -2   25.37    2.42
   4   4   2   22.41    4.36
   4  -4  -2   23.35    1.77
   4  -4   2   26.17    2.16
   4  -4  -2   24.30    2.38
   5  -4   2   51.73    3.25
   5  -4   2   55.22    3.66
   5  -4  -2   54.50    2.71
   5  -4  -2   53.39    3.26
   5   4  -2   55.45    4.92
   5   4  -2   44.61    3.13
   5   4   2   46.47    3.30
   5   4   2   51.46    5.12
   6  -4  -2  434.20    8.38
   6   4  -2  425.97    9.20
   6  -4  -2  440.29    9.44
   6   4   2  421.89    9.14
   6   4   2  383.63   11.76
   6  -4   2  423.59    9.46
   6   4  -2  399.69   11.50
   6  -4   2  420.80    8.90
   7   4  -2   92.28    7.15
   7   4   2   96.72    6.79
   7  -4   2  107.05    5.00
   7  -4   2  105.86    4.93
   7  -4  -2   90.00    4.85
   7   4  -2  101.24    4.95
   7   4   2   96.20    4.69
   8   4   2  902.06   17.72
   8   4  -2  915.27   17.85
   8  -4   2  951.89   18.14
   8   4  -2  958.64   20.32
   8   4   2  906.48   20.62
   8  -4  -2  970.17   18.19
   9  -4   2   -0.51    2.75
   9  -4  -2   -3.07    3.22
   9   4   2    1.79    3.25
   9   4  -2   -1.91    3.18
  10   4   2   49.34    4.67
  10   4  -2   51.54    4.48
  10  -4   2   46.68    4.39
  10  -4  -2   56.01    4.85
  11   4  -2  107.00    6.42
  11  -4   2  114.37    6.41
  11  -4  -2  108.28    6.30
  11   4   2  108.98    6.35
  12   4  -2   46.22    5.47
  12  -4   2   44.16    5.27
  12  -4  -2   36.89    5.10
  12   4   2   51.66    5.34
  13   4  -2   63.12    6.16
  13  -4   2   51.47    5.73
  13   4   2   63.52    6.10
  13  -4  -2   62.04    6.02
   0   5  -2    0.65    3.16
   0  -5  -2   -0.50    1.60
   0   5   2   -1.43    3.31
   1   5   2  358.19   10.02
  -1   5   2  373.69    9.22
  -1  -5   2  369.89    6.50
   1   5   2  353.01    6.61
   1   5  -2  350.59    6.96
  -1   5  -2  367.11    9.11
   1   5  -2  340.35    9.69
  -1  -5  -2  367.74    6.98
  -2   5   2  183.18    6.10
   2   5  -2  168.55    7.53
   2   5   2  180.14    4.24
  -2   5  -2  173.71    6.10
   2   5  -2  181.75    4.69
   2   5   2  177.04    7.75
  -3   5   2   98.07    4.50
   3   5   2   95.63    6.81
   3   5   2   88.68    3.34
   3   5  -2   91.88    6.56
   3   5  -2   88.47    3.53
   3  -5   2   92.68    4.21
   3  -5  -2   95.98    3.69
   4  -5   2 1440.51   24.04
   4  -5   2 1428.87   23.89
   4  -5  -2 1461.04   23.69
   4   5  -2 1426.61   23.86
   4   5   2 1392.15   26.97
   4   5  -2 1417.07   26.78
   4  -5  -2 1449.64   23.97
   4   5   2 1424.12   23.62
   5   5  -2   -0.66    3.87
   5  -5  -2   -1.95    1.43
   5  -5   2    1.79    1.76
   5  -5   2    3.07    1.98
   5   5   2   -0.04    1.97
   5   5   2    0.14    4.11
   5   5  -2    3.71    2.21
   5  -5  -2   -0.83    1.84
   6   5  -2    7.59    4.32
   6  -5  -2   10.17    2.62
   6  -5   2    6.50    2.54
   6   5  -2    9.70    2.32
   6   5   2    7.28    2.45
   6  -5  -2    7.68    1.82
   6   5   2    7.93    4.52
   6  -5   2    8.39    2.15
   7   5   2  486.43   10.59
   7   5  -2  477.97   13.42
   7  -5   2  499.18   11.00
   7  -5  -2  479.64   10.80
   7   5  -2  478.65   10.76
   7   5   2  494.98   13.96
   8   5   2  255.28   10.68
   8   5  -2  255.90    7.76
   8  -5  -2  259.97    7.84
   8   5  -2  252.97   10.32
   8   5   2  244.59    7.47
   8  -5   2  268.44    7.89
   9   5   2   20.93    5.95
   9  -5  -2   19.40    3.41
   9   5   2   26.97    3.89
   9  -5   2   27.79    4.00
   9   5  -2   28.14    3.96
  10  -5   2  163.45    6.69
  10   5   2  161.45    6.83
  10  -5  -2  160.71    6.94
  10   5  -2  154.37    6.97
  11   5   2    8.62    4.14
  11   5  -2   15.16    4.41
  11  -5  -2   10.45    4.10
  11  -5   2   12.85    4.08
  12  -5  -2    3.83    4.19
  12  -5   2    4.17    3.79
  12   5  -2   11.21    4.50
  12   5   2    2.27    4.29
  13  -5  -2   14.36    4.86
  13  -5   2   20.37    4.96
  13   5   2   20.30    5.39
  13   5  -2   16.12    5.04
   0   6  -2  387.20   10.21
   0   6   2  374.52   10.53
   0  -6  -2  381.50    7.60
  -1  -6  -2   49.35    2.62
   1   6   2   54.38    2.66
   1   6   2   52.21    4.88
  -1  -6   2   55.67    2.18
  -1   6  -2   60.60    4.36
  -1   6   2   55.55    4.45
   1   6  -2   53.16    3.05
   1   6  -2   49.78    4.69
   2   6   2   89.61    3.18
  -2  -6  -2   95.45    3.02
   2   6  -2   86.24    5.73
  -2   6  -2   85.12    5.41
  -2   6   2   87.89    5.44
   2   6  -2   89.94    3.64
   2   6   2   89.33    5.86
   3   6   2   92.81    6.87
   3   6  -2   79.78    3.51
   3   6  -2   97.48    7.27
   3  -6  -2   88.27    3.82
   3  -6   2   91.03    4.67
   3   6   2   88.26    3.34
  -3   6   2   76.61    4.82
   4  -6   2   63.51    3.69
   4  -6  -2   49.63    3.63
   4  -6  -2   59.20    3.53
   4   6  -2   54.38    3.39
   4   6  -2   66.26    5.64
   4   6   2   74.05    5.96
   4  -6   2   55.04    3.65
   4   6   2   62.11    3.13
   5  -6   2  121.41    4.76
   5  -6  -2  113.66    3.92
   5  -6   2  109.91    4.23
   5   6   2  115.82    7.82
   5  -6  -2  107.59    4.50
   5   6  -2  122.81    4.54
   5   6   2  119.77    4.26
   5   6  -2  109.30    7.61
   6  -6   2  143.80    4.68
   6   6  -2  141.05    8.33
   6   6  -2  134.32    5.17
   6  -6  -2  129.47    5.19
   6  -6  -2  146.72    4.24
   6   6   2  137.26    4.97
   6  -6   2  150.42    5.45
   6   6   2  134.85    8.38
   7   6   2    1.80    4.89
   7  -6  -2    8.08    2.84
   7   6  -2    8.71    4.84
   7  -6   2    6.50    2.55
   7   6  -2    2.81    2.78
   7   6   2   -0.37    2.65
   8  -6  -2  145.95    6.05
   8   6  -2  130.54    5.87
   8  -6   2  136.71    5.98
   8   6  -2  130.94    8.96
   8   6   2  135.95    9.17
   8   6   2  149.46    5.93
   9   6   2  166.65    6.87
   9  -6  -2  177.27    6.62
   9   6  -2  177.23    6.91
   9  -6   2  163.31    6.75
   9   6   2  176.91   10.18
  10  -6   2    1.22    3.54
  10   6  -2    2.05    3.64
  10   6   2    0.06    3.49
  10  -6  -2   -3.01    3.03
  11   6   2    9.81    4.13
  11   6  -2   11.12    4.34
  11  -6  -2    9.04    4.12
  11  -6   2    6.25    4.03
  12   6  -2   37.46    5.34
  12  -6  -2   42.36    5.25
  12  -6   2   44.20    5.28
  12   6   2   43.73    5.48
  13  -6  -2   17.37    5.08
  13   6  -2   32.24    5.52
  13  -6   2   26.33    5.22
  13   6   2   32.84    5.53
   0   7   2   -0.04    3.60
   0   7  -2    0.20    3.52
   0  -7  -2    1.96    1.73
  -1   7   2  693.30   15.18
  -1  -7  -2  716.15   12.60
   1   7  -2  687.90   12.49
   1   7  -2  697.34   15.74
  -1   7  -2  721.17   15.08
  -1  -7   2  721.60   12.16
   1   7   2  679.35   15.99
   2   7   2  258.41    5.75
  -2   7  -2  236.53    7.96
  -2   7   2  250.87    8.03
   2   7  -2  271.92    9.60
   2   7   2  242.40    9.73
   2   7  -2  258.41    6.07
  -2  -7  -2  252.85    5.55
   3   7  -2 1238.43   20.94
   3   7   2 1221.91   20.62
   3   7  -2 1242.52   24.67
   3   7   2 1244.75   24.95
  -3   7   2 1249.60   22.47
   4   7  -2  145.83    8.10
   4   7   2  142.52    4.53
   4   7  -2  141.94    4.65
   4  -7  -2  137.57    4.73
   4  -7   2  143.44    5.32
   4   7   2  146.16    8.37
   5  -7  -2  156.07    5.32
   5   7  -2  164.77    5.28
   5   7   2  168.56    5.14
   5   7   2  157.08    8.79
   5  -7   2  163.95    5.31
   5  -7   2  163.41    5.22
   5   7  -2  144.63    8.58
   5  -7  -2  144.02    4.94
   6   7  -2   22.21    5.26
   6  -7   2   26.53    2.66
   6  -7  -2   23.18    3.11
   6   7   2   29.15    2.98
   6   7  -2   26.26    3.14
   6   7   2   24.45    5.54
   6  -7  -2   32.18    2.48
   6  -7   2   29.55    3.22
   7   7   2   64.35    6.97
   7  -7  -2   75.35    4.26
   7   7   2   61.40    4.21
   7  -7   2   59.71    4.46
   7   7  -2   63.19    4.46
   7   7  -2   79.67    6.98
   8   7  -2   62.99    7.05
   8  -7  -2   73.67    4.97
   8  -7   2   74.49    5.01
   8   7  -2   69.23    4.99
   8   7   2   62.65    7.31
   8   7   2   75.84    4.82
   9   7  -2    0.37    3.36
   9  -7  -2    2.55    3.36
   9   7   2    3.63    3.36
   9  -7   2   -0.23    2.90
   9   7   2   -4.19    5.75
  10   7  -2   21.85    4.25
  10  -7   2   16.89    3.63
  10   7   2   19.61    4.15
  10  -7  -2   19.55    4.13
  11  -7   2  187.01    7.88
  11   7  -2  186.59    7.93
  11  -7  -2  179.21    7.83
  11   7   2  176.53    7.71
  12  -7   2  279.59    9.99
  12   7  -2  283.04   10.05
  12  -7  -2  282.05    9.95
  12   7   2  290.87    9.92
   0   8   2  148.44    7.94
   0  -8  -2  152.40    4.42
   0   8  -2  123.32    7.28
  -1  -8   2  409.33    7.64
  -1   8  -2  398.98   11.01
   1   8  -2  396.97   11.70
   1   8   2  391.93   11.76
  -1   8   2  385.79   11.12
  -1  -8  -2  411.43    8.10
  -2  -8   2    6.65    1.35
   2   8   2    9.33    1.93
   2   8   2    1.04    4.34
  -2   8  -2    5.68    3.38
  -2  -8  -2    8.07    1.73
   2   8  -2    7.81    2.04
   2   8  -2    6.80    4.42
  -2   8   2    8.71    3.50
  -3   8  -2  966.32   18.66
   3   8   2  937.28   21.00
   3   8  -2  954.42   16.82
  -3   8   2  955.69   18.68
   3   8  -2  951.29   20.80
   3   8   2  957.67   16.52
  -4   8   2    1.58    2.61
   4   8   2    1.25    2.07
   4   8  -2    1.93    4.50
   4   8   2    6.26    4.84
   4   8  -2    3.69    2.34
   4  -8  -2    2.03    2.17
   4  -8   2    4.80    2.80
   5  -8  -2  251.55    6.83
   5  -8  -2  249.35    6.78
   5  -8   2  231.67    6.79
   5   8   2  244.69    6.32
   5  -8   2  251.39    6.88
   5   8   2  243.18   10.71
   5   8  -2  243.83   10.45
   5   8  -2  242.00    6.59
   6   8  -2   68.22    4.52
   6  -8  -2   65.33    4.29
   6   8  -2   59.04    6.60
   6  -8   2   69.97    4.47
   6   8   2   72.97    4.25
   6  -8   2   60.82    4.04
   6   8   2   78.88    7.29
   7   8   2  137.38    5.60
   7   8  -2  128.66    9.16
   7   8  -2  127.02    5.71
   7  -8  -2  126.84    5.55
   7  -8   2  126.23    5.66
   7   8   2  141.98    9.66
   8  -8   2   39.02    3.86
   8   8  -2   42.73    4.18
   8  -8  -2   41.36    4.06
   8   8   2   37.29    6.92
   8   8   2   43.14    4.26
   8   8  -2   43.06    6.85
   9   8   2  101.52    5.63
   9   8  -2   98.35    8.41
   9   8  -2   95.54    5.72
   9  -8  -2   87.52    5.16
   9  -8   2   96.13    5.66
   9   8   2  104.56    8.79
  10  -8  -2    9.28    3.91
  10   8  -2   11.17    4.17
  10  -8   2   11.87    3.50
  10   8   2   14.49    4.10
  11   8   2  305.14    9.79
  11  -8  -2  291.96    9.77
  11   8  -2  289.98    9.83
  11  -8   2  292.63    9.83
  12   8  -2   12.02    4.87
  12  -8   2    2.35    4.22
  12  -8  -2    2.84    4.41
  12   8   2    8.64    4.94
   0   9  -2   -2.51    3.83
   0  -9  -2    2.18    1.89
   0  -9   2    1.94    1.68
   0   9   2    0.83    4.04
  -1  -9   2  527.17    9.69
  -1   9  -2  506.65   13.22
  -1  -9  -2  534.67   10.12
   1   9   2  520.14   14.32
  -1   9   2  539.65   13.51
   1   9  -2  510.17   14.06
  -2   9   2   92.32    6.48
  -2  -9   2   80.45    2.85
   2   9  -2   78.16    6.43
   2   9   2   85.76    3.52
  -2  -9  -2   79.22    3.29
  -2   9  -2   89.83    6.35
   2   9   2   80.24    6.73
   2   9  -2   77.24    3.65
   3   9  -2 1273.93   26.45
  -3   9   2 1313.05   24.29
   3   9   2 1284.96   26.63
  -3   9  -2 1279.94   24.19
   3   9   2 1293.49   21.74
   3   9  -2 1267.09   22.06
   4   9   2   15.75    5.45
  -4   9   2   14.95    3.29
   4  -9   2   15.35    3.26
   4   9  -2    8.77    5.11
   4   9   2   17.29    2.54
   4  -9  -2   14.78    2.52
   4   9  -2    8.46    2.63
   5   9  -2  691.87   13.47
   5  -9   2  682.13   13.98
   5   9  -2  657.28   17.59
   5  -9  -2  702.32   13.61
   5   9   2  681.54   13.22
   5  -9  -2  694.65   13.99
   5  -9   2  698.51   13.79
   5   9   2  687.75   18.21
   6   9  -2    2.76    2.72
   6   9   2   -0.10    5.52
   6  -9   2    1.41    2.77
   6  -9   2    4.67    2.43
   6  -9  -2    4.18    2.68
   6   9   2    3.48    2.72
   6   9  -2    4.54    5.35
   7   9  -2  131.12    9.52
   7   9   2  132.08    9.27
   7   9  -2  137.37    5.77
   7   9   2  136.35    5.52
   7  -9   2  131.14    5.85
   7  -9  -2  142.20    5.84
   8   9   2   70.24    4.78
   8   9  -2   76.78    7.98
   8  -9  -2   65.65    4.70
   8  -9   2   62.54    4.59
   8   9   2   90.32    8.48
   8   9  -2   70.25    5.02
   9   9   2   19.24    6.87
   9   9  -2   19.91    6.57
   9   9  -2   22.77    4.11
   9  -9  -2   16.22    3.39
   9  -9   2   12.53    3.38
   9   9   2   12.85    3.72
  10  -9   2   15.30    4.12
  10   9  -2   20.30    4.41
  10  -9  -2   16.55    4.13
  10   9   2   25.21    4.59
  11   9  -2   17.79    4.78
  11   9   2   18.95    4.59
  11  -9   2   24.32    4.65
  11  -9  -2   22.10    4.53
  12   9  -2   40.94    5.66
  12  -9  -2   26.16    5.01
  12   9   2   38.56    5.45
  12  -9   2   24.87    5.05
   0  10  -2 1060.56   22.12
   0 -10   2 1019.77   18.20
   0 -10  -2 1041.62   18.54
   0  10   2 1030.42   22.27
   1  10  -2   24.72    5.09
  -1 -10  -2   33.29    2.49
  -1  10   2   25.65    4.78
  -1  10  -2   23.27    4.68
   1  10   2   24.78    5.36
  -1 -10   2   29.13    2.15
   1 -10  -2   24.89    2.73
  -2  10   2   12.38    4.16
   2  10   2   12.49    2.18
  -2 -10   2   11.91    1.75
   2  10   2   20.78    5.26
   2  10  -2   13.52    2.52
   2  10  -2   10.06    4.86
  -2 -10  -2   14.49    2.13
  -2  10  -2    8.03    3.96
   3  10  -2  913.83   16.76
   3  10   2  931.40   16.42
   3  10   2  893.54   21.42
   3  10  -2  930.62   21.44
  -3  10   2  929.15   19.30
  -3  10  -2  945.93   19.29
   4  10   2   15.02    2.62
   4  10  -2   10.43    2.59
   4  10  -2   17.84    5.56
   4  10   2   11.99    5.48
  -4  10   2   10.89    3.59
   5  10  -2   20.59    6.05
   5 -10  -2   25.66    3.11
   5 -10  -2   25.96    3.56
   5  10   2   22.87    2.79
   5  10  -2   25.91    3.28
   5  10   2   16.31    5.98
   5 -10   2   21.05    3.40
   6 -10   2  535.75   11.80
   6  10  -2  551.59   11.75
   6  10  -2  522.96   16.25
   6 -10  -2  554.59   11.89
   6  10   2  512.16   16.52
   6 -10   2  534.09   11.96
   6  10   2  546.22   11.56
   7  10   2   16.56    3.21
   7  10  -2   12.35    3.59
   7  10  -2    2.50    5.86
   7  10   2   16.37    6.51
   7 -10  -2   18.08    3.37
   7 -10   2   14.59    3.44
   8  10   2   69.79    4.82
   8  10  -2   63.67    4.73
   8  10   2   53.81    8.01
   8  10  -2   90.14    8.48
   8 -10   2   78.27    5.26
   8 -10  -2   68.09    4.97
   9  10   2  131.74   10.17
   9  10   2  127.72    6.18
   9 -10   2  111.07    6.21
   9 -10  -2  123.04    6.25
   9  10  -2  113.05    9.45
   9  10  -2  112.24    6.48
  10 -10   2    2.80    3.39
  10 -10  -2    2.84    3.77
  10  10   2    7.35    4.01
  10  10  -2   -0.88    4.04
  11  10   2   36.61    4.95
  11  10  -2   21.82    4.94
  11 -10  -2   19.45    4.51
  11 -10   2   22.12    4.31
  12  10   2    7.87    5.07
  12  10  -2    4.04    4.97
  12 -10  -2    0.76    4.35
  12 -10   2   16.69    4.92
   0 -11   2    1.67    1.98
   0  11  -2    0.69    4.28
   0 -11  -2    1.17    2.08
   0  11   2   -3.97    4.35
  -1  11   2  335.42   11.44
   1  11  -2  347.16   12.03
   1  11   2  322.17   12.17
  -1 -11  -2  328.98    7.50
  -1  11  -2  324.59   11.21
  -1 -11   2  342.50    7.13
   1 -11  -2  343.63    8.12
  -2  11  -2  147.41    8.03
   2  11   2  157.23    9.70
   2  11  -2  139.61    8.95
  -2  11   2  148.07    8.11
  -2 -11  -2  152.62    4.61
  -3  11  -2   16.20    4.13
   3  11   2   12.80    2.48
  -3  11   2   11.47    4.14
   3  11   2    7.67    5.39
   3  11  -2   17.06    5.59
   3  11  -2   17.87    2.75
   4  11   2  346.23   13.21
   4  11  -2  330.85   12.89
   4  11   2  337.91    8.04
   4  11  -2  340.55    8.42
  -4  11   2  348.73   10.29
   5  11  -2  253.67    7.30
   5  11   2  248.66   11.90
   5 -11   2  248.95    8.20
   5  11   2  236.87    6.68
   5 -11  -2  248.86    7.17
   5  11  -2  242.48   11.55
   6 -11   2  144.06    6.14
   6  11  -2  143.10   10.14
   6  11   2  141.87    5.66
   6  11  -2  143.57    6.02
   6  11   2  137.14   10.24
   6 -11  -2  135.83    5.72
   6 -11   2  136.88    5.88
   7 -11  -2   54.64    4.34
   7  11  -2   57.85    4.37
   7 -11   2   61.03    4.59
   7  11  -2   59.71    7.86
   7  11   2   68.27    8.31
   7  11   2   57.77    4.41
   8 -11   2   -3.25    3.25
   8 -11  -2   -0.06    3.13
   8  11   2    4.68    3.54
   8  11  -2    1.79    3.41
   8  11   2   -1.56    6.57
   8  11  -2    1.02    6.15
   9  11   2   -1.01    3.72
   9  11   2    2.83    6.79
   9  11  -2   -0.35    6.43
   9  11  -2    0.89    3.77
   9 -11   2   -5.20    3.43
   9 -11  -2    0.71    3.42
  10 -11   2   47.41    4.80
  10  11  -2   60.36    5.50
  10  11   2   56.01    8.95
  10 -11  -2   54.51    5.16
  10  11   2   52.51    5.45
  11 -11  -2    0.80    4.08
  11  11  -2    7.51    4.65
  11 -11   2    4.22    4.08
   0  12  -2  131.85    8.56
   0 -12   2  118.51    4.47
   0 -12  -2  128.78    4.76
   0  12   2  136.00    8.91
   1  12   2  115.31    8.82
  -1  12   2  123.87    8.18
  -1  12  -2  125.13    8.29
  -1 -12  -2  114.20    4.53
   1  12  -2  123.71    8.64
   1 -12  -2  112.06    4.91
  -2  12  -2   19.15    4.78
  -2  12   2    6.26    4.56
   2  12   2    9.14    5.58
   2  12  -2    3.65    5.21
   3  12  -2  121.75    8.79
  -3  12   2  124.45    7.70
   3  12   2  110.78    8.56
   3  12  -2  123.77    5.10
  -3  12  -2  121.82    7.66
   3  12   2  120.64    4.69
   4  12  -2  320.56    8.12
   4  12  -2  316.47   12.94
   4  12   2  330.47    7.91
  -4  12   2  316.32   10.45
   4  12   2  307.38   13.02
   5 -12  -2   62.06    4.38
   5 -12   2   62.59    5.05
   5  12  -2   57.54    7.68
   5  12   2   61.83    7.91
   5  12  -2   64.48    4.66
   5  12   2   64.78    4.32
   6  12   2   86.66    8.78
   6  12  -2   70.84    8.27
   6 -12   2   80.99    5.01
   6  12   2   75.53    4.76
   6  12  -2   74.07    5.11
   6 -12  -2   77.68    4.88
   7 -12  -2   85.93    5.29
   7  12  -2   93.00    9.03
   7  12   2   99.50    9.44
   7  12  -2   92.75    5.35
   7  12   2   96.97    5.38
   7 -12   2   85.82    5.33
   8  12  -2   96.74    5.71
   8  12   2   91.91    9.56
   8  12   2   99.28    5.77
   8 -12  -2   85.95    5.51
   8  12  -2   81.94    9.10
   8 -12   2   94.53    5.74
   9  12  -2   19.52    4.57
   9  12   2   23.40    7.85
   9  12  -2   38.53    7.94
   9 -12  -2   15.61    4.01
   9 -12   2   21.86    4.22
  10 -12   2    9.36    4.15
  10 -12  -2    8.72    4.14
  10  12   2   -3.53    7.19
  10  12  -2   12.79    4.52
  11 -12  -2  142.98    7.56
  11  12  -2  151.69    7.91
  11 -12   2  161.08    7.87
   0 -13  -2    1.58    2.51
   0  13  -2    0.03    4.89
   0  13   2    0.14    5.02
  -1  13  -2  169.05    9.25
   1  13   2  158.91    9.99
   1 -13  -2  153.86    5.72
  -1  13   2  172.50    9.39
   1  13  -2  178.74   10.01
   1 -13   2  158.30    5.51
   2  13   2   36.49    6.59
  -2  13   2   25.49    5.49
  -2  13  -2   25.50    5.36
   2 -13  -2   26.70    3.49
   2  13  -2   18.42    6.00
   3  13  -2  117.54    5.21
  -3  13   2  117.16    7.92
  -3  13  -2  114.00    7.84
   3  13   2  126.32    9.24
   3  13  -2  107.13    8.82
  -4  13   2   16.88    4.55
   4  13  -2   20.07    3.42
   4  13  -2   14.60    6.29
   4  13   2   18.60    3.11
   4  13   2   11.09    6.49
   5  13  -2   60.17    4.46
   5  13  -2   49.70    7.61
   5 -13   2   51.24    5.18
   5  13   2   55.40    4.09
   5 -13  -2   55.74    4.10
   5  13   2   52.07    8.00
   6  13  -2  233.83    7.42
   6  13   2  237.55    7.36
   6 -13  -2  233.17    7.44
   6  13  -2  231.38   12.33
   6  13   2  220.62   12.48
   6 -13   2  238.82    7.64
   7  13   2   32.21    7.86
   7 -13  -2   21.45    3.72
   7  13  -2   24.06    3.89
   7  13  -2   29.20    7.50
   7 -13   2   22.67    3.94
   8  13  -2   38.28    8.09
   8  13  -2   53.72    5.10
   8 -13  -2   50.69    4.64
   8  13   2   55.13    8.69
   8 -13   2   44.05    4.66
   9  13  -2   -6.44    6.69
   9 -13  -2    0.76    3.58
   9  13   2   -6.12    7.28
   9  13  -2    6.50    4.43
   9 -13   2   -1.85    3.61
  10 -13  -2   14.19    4.20
  10 -13   2   17.98    4.41
  10  13  -2   17.27    4.77
  10  13   2   11.89    8.13
   0  14  -2   57.23    7.06
   0  14   2   59.09    7.11
  -1  14   2  123.37    8.96
   1  14   2  133.38    9.90
  -1  14  -2  116.72    8.92
   1 -14  -2  130.56    5.45
   1  14  -2  125.28    9.42
   2  14  -2  130.54    9.66
  -2  14  -2  117.29    8.66
   2 -14  -2  123.44    5.77
  -2  14   2  122.60    8.73
   2  14   2  122.78    9.31
  -3  14  -2  113.10    8.22
   3  14   2  105.83    9.21
   3  14  -2  112.45    9.14
  -3  14   2  120.63    8.42
  -4  14   2   23.44    5.12
   4  14  -2    3.92    6.32
   4  14  -2   15.88    3.20
   4  14   2    9.11    6.73
  -4  14  -2   19.60    5.03
   5  14  -2   12.89    3.66
   5 -14   2    0.92    3.99
   5 -14  -2    5.19    3.07
   5  14  -2    8.67    6.56
   5  14   2    3.73    6.78
   6 -14  -2   89.65    5.47
   6  14  -2   85.62    5.58
   6  14   2  102.60   10.11
   6  14  -2   87.82    9.36
   6 -14   2   97.58    5.51
   7  14  -2   52.00    5.00
   7  14   2   50.02    8.83
   7 -14   2   62.56    4.84
   7 -14  -2   57.57    4.80
   7  14  -2   58.42    8.64
   8  14   2   82.57    9.96
   8  14  -2   92.01    9.77
   8 -14   2   76.42    5.59
   8 -14  -2   65.41    5.29
   9  14  -2   30.29    8.28
   9  14   2   32.90    8.74
   9 -14   2   26.08    4.46
   9 -14  -2   24.73    4.48
  10 -14  -2    0.68    4.07
  10  14   2    2.14    7.97
  10 -14   2    6.21    4.15
   0  15   2    1.40    5.62
   0  15  -2    7.32    5.72
  -1  15   2  135.52    9.58
  -1  15  -2  127.21    9.43
   1  15   2  135.49   10.17
   1  15  -2  134.11    9.98
   2  15   2    4.80    6.28
   2  15  -2    1.90    5.82
   2 -15  -2    0.83    3.06
  -2  15  -2   -3.93    4.98
  -2  15   2    5.43    5.25
  -3  15   2  231.22   10.67
  -3  15  -2  226.97   10.48
   3  15  -2  201.77   11.58
   3  15   2  205.46   12.03
   4  15   2   16.50    7.12
   4  15  -2    7.39    6.66
  -4  15   2   12.48    5.21
  -4  15  -2    7.24    5.05
   5  15  -2  482.66   11.64
   5 -15   2  498.02   13.64
   5 -15  -2  504.20   11.68
   5  15   2  493.43   17.75
   5  15  -2  469.71   17.13
   6  15   2   61.59    9.08
   6 -15  -2   61.59    4.67
   6  15  -2   65.46    8.90
   6 -15   2   64.91    4.74
   7 -15   2  207.10    7.85
   7  15   2  189.89   12.89
   7 -15  -2  198.31    7.45
   7  15  -2  190.88   12.39
   8  15  -2   -0.05    7.29
   8  15   2   10.96    8.17
   8 -15   2   13.81    4.00
   8 -15  -2   11.67    3.91
   9 -15   2    3.56    3.94
   9  15  -2    5.97    7.43
   9  15   2   -4.79    7.67
   9 -15  -2   -2.12    3.80
   0  16  -2   48.89    7.33
   0  16   2   43.25    7.23
   1  16  -2    3.53    5.87
   1  16   2   -3.57    5.95
  -1  16  -2    4.32    5.64
  -1  16   2   -3.58    5.54
   2  16   2   16.72    6.82
  -2  16   2    5.19    5.73
  -2  16  -2   22.05    6.10
   2  16  -2   13.68    6.44
   3 -16  -2    8.80    3.85
  -3  16  -2    6.95    5.34
   3  16  -2    1.28    6.07
   3  16   2    6.59    6.40
  -3  16   2    8.53    5.51
  -4  16  -2   -6.84    4.87
   4  16  -2   -2.21    6.41
  -4  16   2    3.78    5.23
   4  16   2    3.28    6.70
   5  16   2  129.47   10.84
   5  16  -2  136.45   10.87
   5 -16  -2  136.11    6.21
   5 -16   2  130.03    8.01
   6  16  -2  102.32   10.35
   6 -16  -2  120.80    6.22
   6  16   2  122.49   11.16
   6 -16   2  120.32    6.17
   7 -16   2    3.05    3.53
   7  16  -2   -4.25    7.04
   7 -16  -2    5.83    3.62
   7  16   2    5.83    7.64
   8  16   2   38.69    8.93
   8 -16  -2   36.88    4.64
   8 -16   2   48.07    5.12
   8  16  -2   41.64    8.97
   9  16   2    1.38    7.93
   9  16  -2   -1.08    7.72
   9 -16   2   -4.96    3.66
   9 -16  -2   -3.37    3.92
   0  17   2    4.99    6.26
   0  17  -2    4.87    6.16
   1  17  -2  509.10   17.25
  -1  17   2  489.61   16.57
   1  17   2  489.29   17.09
  -1  17  -2  492.54   16.48
  -2  17   2  123.49    9.28
   2  17   2  110.01    9.94
   2  17  -2  120.15   10.10
  -2  17  -2  126.16    9.28
   3  17  -2  192.54   11.82
   3  17   2  192.17   12.29
  -3  17   2  198.80   10.87
  -3  17  -2  201.85   10.71
   4  17  -2    3.24    6.70
  -4  17   2   -2.20    5.21
   4 -17  -2   -0.44    3.87
   4  17   2   -6.14    6.70
   5  17   2   19.91    7.95
   5  17  -2   15.14    7.65
   6 -17  -2   92.15    5.94
   6 -17   2   99.95    6.18
   6  17   2   96.69   10.63
   6  17  -2  100.43   10.52
   7 -17  -2    5.71    3.69
   7  17  -2   16.12    7.98
   7  17   2    5.30    7.97
   7 -17   2    7.04    3.79
   8 -17  -2   37.56    4.78
   8 -17   2   32.06    4.92
   8  17   2   36.41    9.21
   8  17  -2   27.66    8.74
   0  18   2    3.49    6.59
   0  18  -2    6.26    6.51
  -1  18   2   -5.28    6.08
  -1  18  -2    2.21    6.07
   1  18   2   -5.93    5.99
   1  18  -2    3.60    6.56
  -2  18  -2    4.10    6.09
   2  18  -2    7.32    6.78
   2  18   2   -1.28    6.63
  -2  18   2    9.00    6.19
  -3  18   2    3.42    5.96
   3  18  -2    2.98    6.85
   3  18   2   -5.85    6.64
  -3  18  -2   10.03    6.13
  -4  18   2    9.64    5.90
   4  18   2    3.02    7.21
   4  18  -2   13.14    7.25
   5  18   2  134.70   11.82
   5  18  -2  119.48   10.91
   6  18   2    4.66    7.79
   6  18  -2    6.39    7.73
   6 -18   2    3.70    3.63
   7  18  -2    9.95    8.07
   7  18   2   28.62    9.06
   7 -18   2   27.84    4.69
   0  19   2    1.82    6.75
   0  19  -2   -2.09    6.48
   1  19   2  220.27   13.07
   1  19  -2  211.71   12.79
  -1  19   2  215.85   12.70
  -1  19  -2  241.32   12.77
  -2  19  -2   69.67    8.51
   2  19   2   69.17    9.31
   2  19  -2   70.14    9.25
  -2  19   2   75.80    8.73
   3  19  -2   29.96    8.05
   3  19   2   21.23    7.80
  -3  19   2   23.13    7.01
  -3  19  -2   22.49    6.96
   4  19  -2    9.93    7.51
   4  19   2   24.53    8.41
   5  19  -2   20.42    8.09
   5  19   2   30.22    8.87
   6  19   2   -4.12    7.79
   6  19  -2    0.78    7.66
   0  20   2   13.18    7.58
   0  20  -2   14.43    7.27
  -1  20   2  148.96   11.50
   1  20  -2  146.05   11.52
  -1  20  -2  152.86   11.43
   1  20   2  153.16   11.93
  -2  20  -2   31.90    7.81
   2  20  -2   14.85    7.59
  -2  20   2   28.86    7.77
   2  20   2   38.85    8.62
  -3  20   2   -2.28    6.39
   3  20  -2    7.34    7.36
  -3  20  -2   18.27    7.10
   3  20   2    4.46    7.38
   4  20  -2    2.17    7.44
   4  20   2    3.23    7.49
   5  20   2   -2.68    7.76
   5  20  -2    0.46    7.66
   0  21   2   -1.14    7.42
   0  21  -2   -0.56    6.98
  -1  21  -2    1.80    7.05
  -1  21   2   -5.25    6.77
   1  21   2    9.36    7.79
   1  21  -2   -2.14    6.98
   2  21  -2   36.59    8.73
  -2  21   2   30.05    8.07
  -2  21  -2   35.22    8.14
   2  21   2   42.43    9.18
   3  21  -2    6.21    7.61
   3  21   2    0.04    7.33
  -3  21   2   -3.80    6.56
  -3  21  -2    5.98    6.89
   0   0  -3    0.19    0.54
   0   0   3    0.57    0.72
   1   0   3   -2.94    1.28
   1   0  -3   -4.13    0.85
   2   0   3   -1.17    1.34
   2   0  -3   -1.90    1.23
   2   0   3    0.81    2.00
   3   0   3   -0.55    1.70
   3   0   3   -4.76    2.42
   3   0  -3   -0.14    1.85
   3   0  -3    1.25    1.98
   4   0   3   -0.89    2.59
   4   0  -3    0.02    2.22
   4   0  -3   -1.01    1.96
   4   0   3    0.68    1.82
   5   0  -3   -1.96    2.04
   5   0  -3   -1.93    2.35
   5   0   3   -1.68    1.99
   5   0   3    0.57    2.87
   6   0  -3   -1.67    2.01
   6   0  -3    1.81    2.67
   6   0   3    2.90    3.09
   6   0   3    3.95    2.06
   7   0   3    2.37    3.45
   7   0  -3    1.59    2.60
   7   0  -3   -2.41    2.84
   7   0   3   -4.33    2.37
   8   0   3    0.90    2.51
   8   0  -3    0.17    2.63
   8   0   3   10.18    4.09
   9   0  -3   -2.51    2.82
   9   0   3    1.75    3.18
  10   0   3    2.45    3.05
  10   0  -3    0.66    3.15
  11   0  -3    1.35    3.83
  11   0   3    7.63    3.86
  12   0  -3   -3.50    3.93
  12   0   3   -4.28    4.00
  13   0  -3   -0.98    4.32
  13   0   3   -0.50    4.15
   0   1   3   -2.43    1.26
   0  -1   3   -2.35    0.97
   0   1  -3   -3.89    0.70
   0  -1  -3   -2.03    0.79
   1   1   3  330.85    5.61
   1   1   3  332.29    6.87
   1  -1  -3  333.76    5.69
   1   1  -3  317.18    5.72
   1   1  -3  317.87    6.42
   1  -1   3  331.24    6.03
   2   1  -3  527.47    9.19
   2  -1   3  527.32    9.26
   2  -1  -3  539.68    9.23
   2   1   3  531.79   10.56
   2  -1   3  528.13    9.51
   2   1   3  532.71    9.12
   2   1  -3  528.22   10.07
   3  -1   3   10.09    2.14
   3   1   3    7.75    3.00
   3   1  -3   11.76    2.67
   3   1  -3   10.97    2.02
   3  -1  -3    7.97    1.73
   3   1   3   10.86    1.76
   3  -1   3   10.68    1.72
   4  -1   3  532.76   10.20
   4   1  -3  544.94   10.35
   4  -1   3  561.75   10.86
   4   1   3  540.43   11.81
   4   1   3  549.66   10.24
   4  -1  -3  563.09   10.02
   4   1  -3  539.10   10.98
   4  -1  -3  547.00   10.36
   5  -1   3   55.58    3.21
   5  -1   3   47.97    3.52
   5   1  -3   52.14    3.24
   5  -1  -3   48.85    3.17
   5  -1  -3   48.57    3.67
   5   1   3   53.91    4.25
   5   1   3   48.52    3.39
   5   1  -3   56.89    3.81
   6  -1  -3  101.83    4.57
   6   1  -3  101.56    4.31
   6   1   3  102.76    6.31
   6  -1   3  106.13    5.57
   6   1  -3  104.74    5.56
   6   1   3  105.34    4.45
   6  -1   3  100.19    4.52
   6  -1  -3  111.25    4.63
   7   1  -3   11.58    3.42
   7   1  -3   10.67    2.62
   7  -1  -3   11.95    2.56
   7  -1   3   11.44    3.43
   7   1   3    6.58    3.89
   7   1   3   11.97    2.82
   7  -1   3   13.19    2.88
   8  -1   3  553.13   12.11
   8   1  -3  546.52   12.11
   8   1   3  552.33   13.70
   8  -1  -3  562.71   12.18
   8   1   3  549.42   11.97
   9  -1  -3  115.24    5.48
   9   1   3  118.36    5.70
   9  -1   3  122.27    5.86
   9   1  -3  122.22    5.59
  10  -1   3   48.72    4.71
  10   1   3   54.47    4.71
  10  -1  -3   48.53    4.67
  10   1  -3   41.72    4.60
  11   1   3    9.63    3.99
  11   1  -3    9.67    4.14
  11  -1  -3    9.28    4.14
  11  -1   3    7.81    4.01
  12   1  -3   17.92    4.56
  12  -1  -3   14.29    4.45
  12  -1   3   14.19    4.41
  12   1   3   10.91    4.39
  13   1   3   35.86    5.35
  13  -1  -3   28.86    5.19
  13  -1   3   28.02    5.15
  13   1  -3   23.07    5.04
   0  -2  -3 2321.48   38.11
   0   2   3 2268.41   37.14
   1  -2  -3 2612.00   40.91
   1  -2   3 2652.88   41.23
   1   2   3 2514.03   41.23
  -1   2   3 2573.76   41.73
   1   2  -3 2611.19   41.75
   1   2  -3 2562.29   40.38
   2   2  -3  399.24    7.44
  -2   2   3  388.84    7.22
   2  -2   3  405.16    7.52
   2  -2  -3  411.92    7.40
   2   2   3  402.71    9.46
   2   2   3  394.81    7.09
   2   2  -3  402.08    8.90
   3   2  -3 2310.15   38.24
   3  -2   3 2321.65   36.83
   3   2   3 2254.17   38.71
   3  -2   3 2346.22   37.16
   3   2   3 2351.29   36.63
   3  -2  -3 2334.95   36.79
   3   2  -3 2318.69   36.79
   4  -2  -3 3415.37   52.09
   4  -2   3 3257.68   51.85
   4   2  -3 3170.73   51.27
   4   2  -3 3204.97   52.81
   4   2   3 3257.77   51.18
   4   2   3 3242.96   53.50
   4  -2  -3 3231.59   51.34
   4  -2   3 3236.50   51.36
   5   2   3  440.11    9.11
   5  -2  -3  451.51    9.35
   5  -2   3  444.14    9.35
   5  -2   3  451.25    9.49
   5   2  -3  460.33    9.25
   5  -2  -3  476.93    8.67
   5   2  -3  450.68   10.56
   5   2   3  434.43   11.16
   6   2  -3   80.19    4.26
   6  -2   3   75.98    4.88
   6  -2  -3   74.32    4.21
   6   2   3   84.79    4.11
   6   2   3   82.41    5.44
   6  -2  -3   86.77    4.05
   6   2  -3   83.93    5.76
   6  -2   3   83.81    4.25
   7   2   3  279.85    7.37
   7  -2  -3  273.17    7.30
   7   2   3  282.19    9.49
   7  -2   3  271.25    7.51
   7   2  -3  280.18    7.56
   7   2  -3  269.78    8.61
   7  -2   3  288.05    8.15
   8   2  -3  508.03   11.35
   8   2   3  523.11   13.53
   8  -2  -3  499.87   11.50
   8   2   3  504.99   11.35
   8  -2   3  518.06   11.40
   9  -2   3   39.66    3.88
   9   2   3   44.19    4.28
   9   2  -3   40.25    4.27
   9  -2  -3   45.90    4.29
  10   2   3  281.62    8.59
  10  -2  -3  261.36    8.54
  10  -2   3  272.42    8.71
  10   2  -3  270.66    8.65
  11  -2   3   14.40    4.20
  11   2  -3   12.06    4.11
  11  -2  -3   20.25    3.91
  11   2   3   12.54    3.97
  12  -2   3   -0.96    4.04
  12   2  -3    1.29    4.27
  12  -2  -3   -6.82    3.91
  12   2   3   -4.75    3.97
  13   2  -3   42.74    5.61
  13   2   3   41.46    5.37
  13  -2  -3   35.83    5.35
  13  -2   3   36.58    5.36
   0   3   3   -4.40    2.63
   0   3  -3   -2.70    2.35
   0  -3  -3   -2.97    1.25
  -1  -3  -3   51.15    2.34
  -1   3   3   54.21    3.28
   1   3   3   51.58    3.96
   1   3  -3   51.46    2.54
   1   3   3   48.92    1.83
  -1   3  -3   52.45    3.00
   1   3  -3   51.80    3.72
  -2   3   3  145.25    4.44
   2   3  -3  139.17    6.35
   2   3   3  144.42    6.56
   2  -3  -3  147.85    4.01
   2   3   3  145.07    3.52
   2   3  -3  145.83    3.77
   2  -3   3  150.60    4.46
   3  -3   3  284.42    6.15
   3   3  -3  278.55    6.07
   3   3   3  289.74    5.90
   3   3   3  277.14    8.86
   3  -3   3  293.66    6.24
   3  -3  -3  286.02    5.60
   3   3  -3  285.96    8.34
   3  -3  -3  320.62    6.20
   4  -3  -3  325.77    6.01
   4   3   3  315.85    9.53
   4  -3   3  320.03    6.88
   4  -3   3  329.29    7.21
   4   3  -3  323.80    7.15
   4   3  -3  329.56    9.12
   4  -3  -3  333.39    7.15
   4   3   3  324.22    6.93
   5   3  -3   83.12    4.01
   5  -3   3   76.57    3.95
   5   3   3   76.92    3.70
   5   3   3   85.27    5.59
   5  -3  -3   78.01    3.92
   5  -3   3   86.35    3.95
   5  -3  -3   90.94    3.24
   5   3  -3   82.98    6.08
   6  -3   3  193.95    6.10
   6  -3  -3  208.33    5.26
   6   3  -3  202.41    5.84
   6   3   3  185.39    5.71
   6  -3   3  201.55    5.84
   6   3  -3  217.20    8.03
   6   3   3  207.01    8.41
   6  -3  -3  204.67    5.85
   7   3   3    5.22    2.34
   7  -3  -3    5.25    2.77
   7   3   3    3.45    4.25
   7  -3   3    6.73    2.91
   7   3  -3    4.51    2.81
   7  -3   3    5.11    2.42
   7   3  -3    8.48    3.94
   8   3  -3  793.38   15.80
   8   3  -3  796.19   17.35
   8  -3   3  808.42   15.95
   8  -3  -3  774.83   15.77
   8   3   3  797.29   18.30
   8   3   3  775.39   15.56
   9  -3   3   45.49    4.30
   9  -3  -3   40.27    4.27
  10  -3  -3  221.78    7.85
  10   3  -3  229.15    8.03
  10   3   3  214.55    7.66
  10  -3   3  217.96    7.88
  11  -3   3  312.14    9.71
  11  -3  -3  300.50    9.53
  11   3  -3  287.15    9.51
  11   3   3  306.23    9.43
  12   3   3   60.55    5.49
  12  -3   3   50.12    5.38
  12   3  -3   40.01    5.26
  12  -3  -3   58.82    5.54
  13   3   3   26.53    5.15
  13   3  -3   30.74    5.19
  13  -3   3   29.51    4.85
  13  -3  -3   25.62    5.15
   0   4  -3  108.06    5.53
   0   4   3   94.69    6.06
   0  -4  -3  108.20    3.33
  -1  -4  -3 1557.13   25.22
   1   4   3 1525.38   26.89
  -1   4  -3 1528.14   25.87
  -1   4   3 1508.62   25.99
   1   4   3 1516.28   24.12
   1   4  -3 1520.52   26.58
   1   4  -3 1517.85   24.48
   2   4  -3   10.25    1.88
   2   4  -3   13.35    3.67
   2   4   3   10.98    3.78
  -2   4   3   10.36    2.49
   2  -4  -3   11.46    1.72
   2  -4   3    9.28    2.35
   2   4   3   11.34    1.51
   3  -4  -3    4.78    1.82
   3   4   3    0.56    3.69
   3   4   3    4.54    1.57
   3   4  -3    0.54    3.53
   3  -4   3    4.03    1.85
   3   4  -3    6.15    1.87
   4   4   3  144.13    4.40
   4  -4   3  152.40    4.78
   4  -4   3  148.54    4.39
   4   4  -3  149.45    4.60
   4  -4  -3  142.57    4.55
   4   4  -3  154.51    7.17
   4  -4  -3  146.41    3.69
   4   4   3  146.15    7.43
   5  -4   3  133.77    4.56
   5   4  -3  125.78    4.69
   5   4   3  137.11    4.48
   5  -4  -3  138.85    3.60
   5   4  -3  136.35    7.22
   5  -4   3  138.03    4.45
   5   4   3  128.58    7.53
   5  -4  -3  139.77    4.77
   6   4   3   56.40    3.93
   6  -4  -3   63.38    3.25
   6  -4  -3   49.33    3.51
   6  -4   3   54.81    3.90
   6  -4   3   57.38    3.90
   6   4  -3   52.22    5.01
   6   4  -3   56.35    4.01
   6   4   3   63.17    5.68
   7   4   3  648.24   16.24
   7  -4  -3  669.13   13.51
   7   4  -3  647.51   15.45
   7   4   3  669.33   13.25
   7  -4   3  653.08   13.48
   7  -4   3  693.93   13.36
   7   4  -3  660.87   13.35
   8   4  -3   -2.13    4.35
   8  -4  -3    4.37    3.04
   8   4  -3    6.08    2.80
   8   4   3    5.61    2.97
   8   4   3   -3.53    4.72
   8  -4   3    1.66    2.59
   9  -4   3   10.03    3.21
   9  -4  -3   11.98    3.53
   9   4  -3    6.14    3.11
   9   4   3    6.13    3.20
  10  -4   3   49.97    4.71
  10  -4  -3   68.59    5.06
  10   4   3   56.60    4.77
  10   4  -3   61.11    5.05
  11   4  -3   80.61    5.96
  11   4   3   86.02    5.89
  11  -4  -3   77.48    5.84
  11  -4   3   79.53    5.88
  12  -4   3  104.72    6.36
  12   4   3  116.37    6.89
  12   4  -3  108.53    6.86
  12  -4  -3  122.92    6.98
  13  -4   3    5.15    4.61
  13   4  -3   10.22    4.62
  13  -4  -3    8.11    4.58
  13   4   3    4.17    4.67
   0  -5  -3   -0.80    1.69
   0   5  -3    3.28    3.22
   0   5   3   -1.34    3.37
   1   5   3   52.41    4.70
   1   5   3   44.08    2.28
   1   5  -3   49.40    4.46
  -1   5   3   58.72    4.29
  -1  -5   3   53.21    1.78
  -1  -5  -3   53.53    2.75
   1   5  -3   55.08    2.87
  -1   5  -3   64.14    4.05
   2   5  -3   23.43    4.13
   2   5   3   22.69    1.77
   2   5   3   28.96    4.41
  -2   5   3   21.75    3.05
   2   5  -3   25.13    2.17
   3   5   3  165.51    4.30
   3  -5   3  163.13    5.23
   3   5  -3  174.10    7.54
  -3   5   3  166.88    5.42
   3   5   3  164.23    7.84
   3   5  -3  169.58    4.67
   3  -5  -3  174.40    4.65
   4   5  -3  120.60    4.03
   4  -5  -3  122.95    4.00
   4  -5   3  115.90    4.25
   4   5   3  123.34    4.07
   4   5   3  132.45    7.69
   4  -5   3  126.47    4.53
   4   5  -3  120.69    7.23
   4  -5  -3  129.70    4.36
   5   5   3  376.51   11.75
   5   5  -3  400.76    8.70
   5  -5   3  393.35    8.28
   5  -5  -3  399.63    7.58
   5   5   3  402.22    8.39
   5  -5  -3  394.97    8.71
   5   5  -3  403.16   11.51
   5  -5   3  404.84    8.74
   6  -5   3   25.49    2.64
   6   5  -3   22.57    4.68
   6  -5  -3   24.76    2.06
   6  -5  -3   22.57    2.84
   6   5   3   34.22    5.27
   6   5  -3   22.91    2.96
   6  -5   3   20.73    2.91
   6   5   3   24.70    2.71
   7  -5   3  636.26   12.51
   7   5   3  639.55   12.78
   7   5  -3  606.11   12.80
   7   5  -3  611.93   15.45
   7  -5   3  605.66   12.82
   7   5   3  615.77   16.04
   7  -5  -3  612.62   12.73
   8   5  -3   -3.13    4.64
   8   5   3   -1.25    5.07
   8   5  -3   13.12    3.38
   8   5   3    7.77    3.08
   8  -5  -3   -1.61    2.94
   8  -5   3    1.53    2.94
   9  -5  -3  172.18    6.83
   9  -5   3  162.74    6.69
   9   5  -3  166.95    6.48
   9   5   3  170.35    6.62
   9   5   3  179.13    9.98
  10  -5   3   23.56    4.06
  10  -5  -3   30.62    4.32
  10   5   3   30.40    4.22
  10   5  -3   25.95    4.22
  11  -5   3   16.30    4.35
  11  -5  -3    8.96    3.70
  11   5  -3   16.59    4.33
  12   5  -3  224.25    8.90
  12  -5  -3  217.35    8.47
  12  -5   3  229.38    8.89
  12   5   3  243.49    8.98
  13  -5  -3   49.86    5.49
  13   5   3   50.88    5.87
  13   5  -3   57.84    6.09
  13  -5   3   54.78    5.79
   0   6   3  304.67    9.60
   0  -6  -3  312.85    6.66
  -1  -6  -3  352.44    7.14
  -1   6  -3  377.02    9.54
   1   6  -3  350.45    7.21
  -1   6   3  350.78    9.69
   1   6   3  353.54    6.72
   1   6  -3  370.60   10.24
  -1  -6   3  365.53    6.50
  -2  -6  -3  421.99    8.17
   2   6   3  429.42   11.88
   2   6   3  418.58    7.90
   2   6  -3  423.93   11.46
   2   6  -3  425.07    8.45
  -2   6   3  431.27   10.16
  -2   6  -3  416.41   10.04
   3   6   3 1144.36   18.96
   3  -6   3 1128.84   20.32
   3  -6  -3 1146.45   19.31
   3   6  -3 1159.08   19.44
  -3   6   3 1162.28   20.44
   3   6  -3 1121.77   22.57
   3   6   3 1135.73   22.93
   4  -6  -3  200.59    5.43
   4  -6  -3  193.28    5.56
   4   6   3  191.86    8.95
   4   6   3  190.49    5.08
   4  -6   3  191.24    5.60
   4   6  -3  184.08    8.50
   4   6  -3  193.29    5.39
   5   6  -3   99.55    7.49
   5   6   3   89.51    6.60
   5   6  -3   93.70    4.19
   5  -6  -3   90.45    4.19
   5   6   3   82.72    3.74
   5  -6  -3   85.61    3.50
   5  -6   3   93.62    4.40
   5  -6   3   86.33    3.98
   6   6   3  225.08    6.12
   6  -6   3  209.43    6.28
   6   6  -3  211.86    6.37
   6  -6  -3  214.43    5.12
   6   6  -3  213.13    9.27
   6   6   3  193.08    9.53
   6  -6   3  217.05    5.88
   6  -6  -3  214.89    6.39
   7   6   3   42.39    6.21
   7   6  -3   43.04    3.74
   7   6   3   43.65    3.58
   7  -6   3   41.98    3.78
   7  -6  -3   41.93    3.43
   7   6  -3   52.96    5.91
   8   6  -3    1.87    3.18
   8   6   3   -7.25    4.98
   8  -6  -3    3.31    3.06
   8   6  -3    6.44    5.04
   8  -6   3    1.69    2.66
   8   6   3    6.05    3.32
   9   6  -3   18.81    3.81
   9   6   3   26.09    6.35
   9   6   3   29.28    4.01
   9  -6  -3   16.62    3.65
   9  -6   3   20.14    3.82
  10  -6   3    8.76    3.79
  10  -6  -3    2.26    3.26
  10   6   3   11.15    3.80
  10   6  -3   10.12    4.02
  11  -6  -3    0.10    3.90
  11  -6   3    0.40    3.37
  11   6  -3    4.31    4.11
  11   6   3    6.93    4.04
  12  -6  -3  285.74    9.95
  12   6   3  288.20    9.83
  12  -6   3  303.03   10.13
  12   6  -3  288.77   10.00
  13  -6   3  110.69    7.34
  13   6   3  124.73    7.51
  13   6  -3  131.48    7.82
  13  -6  -3   97.62    6.75
   0   7  -3   -2.09    3.44
   0  -7  -3   -2.43    1.78
   0   7   3   -0.47    3.59
  -1   7   3  192.04    7.75
  -1  -7   3  189.10    4.03
  -1  -7  -3  186.72    4.85
   1   7  -3  190.81    8.28
  -1   7  -3  174.20    7.40
   1   7  -3  189.17    4.91
   1   7   3  179.41    8.35
  -2  -7  -3   87.70    3.37
   2   7  -3   92.26    3.67
  -2   7  -3  102.62    5.83
  -2   7   3   85.64    5.80
   2   7   3   87.89    6.21
   2   7   3   86.99    3.33
   2   7  -3   77.48    5.76
   3   7   3  226.57    9.67
   3   7  -3  244.70    9.43
   3   7   3  243.15    5.58
   3  -7   3  253.12    7.29
  -3   7   3  251.65    7.51
   3   7  -3  236.76    6.13
   4   7  -3   50.80    3.44
   4   7   3   54.40    5.97
   4   7  -3   42.68    5.46
   4  -7   3   61.26    4.14
   4  -7  -3   57.57    3.48
   4   7   3   58.12    3.27
  -4   7   3   58.18    3.58
   5   7   3 1146.20   19.49
   5   7  -3 1078.21   23.19
   5  -7  -3 1128.19   19.88
   5   7  -3 1116.41   19.80
   5  -7   3 1126.82   20.08
   5   7   3 1110.99   23.86
   5  -7  -3 1120.61   19.47
   5  -7   3 1128.79   19.82
   6  -7   3    2.43    2.63
   6  -7   3    4.93    2.15
   6  -7  -3    2.69    2.55
   6   7   3    1.88    2.34
   6   7   3   -5.91    4.58
   6   7  -3    1.17    4.62
   6   7  -3   -1.91    2.50
   7  -7   3   11.39    3.12
   7   7   3    4.91    5.40
   7  -7  -3   10.82    3.00
   7   7   3    8.30    2.85
   7   7  -3    8.31    5.12
   7   7  -3    9.03    2.99
   8   7   3    6.33    3.16
   8  -7  -3   11.24    3.20
   8   7   3    5.19    5.78
   8   7  -3   12.66    5.60
   8   7  -3    7.15    3.39
   8  -7   3    7.10    3.23
   9   7   3   69.63    7.88
   9  -7  -3   59.95    4.85
   9   7   3   65.47    4.72
   9  -7   3   72.57    4.83
   9   7  -3   62.40    4.92
  10  -7  -3    6.71    3.78
  10   7  -3   -1.36    3.76
  10  -7   3   -0.02    3.49
  10   7   3   -0.37    3.86
  11   7  -3  339.14   10.48
  11  -7   3  327.27   10.12
  11   7   3  340.26   10.25
  11  -7  -3  340.29   10.39
  12   7  -3   56.78    5.90
  12  -7  -3   32.24    5.05
  12   7   3   51.66    5.58
  12  -7   3   29.90    5.13
   0   8   3  763.68   17.14
   0  -8  -3  764.29   13.87
   0   8  -3  752.13   16.70
   1   8  -3   85.83    6.07
  -1   8  -3   82.73    6.34
  -1  -8   3   84.53    2.78
  -1   8   3   80.11    5.61
   1   8   3   83.19    6.15
  -1  -8  -3   80.24    3.37
   2   8   3  644.26   16.08
   2   8  -3  633.18   11.99
   2   8   3  647.60   11.45
  -2  -8  -3  637.60   11.72
  -2  -8   3  641.63   11.00
   2   8  -3  647.99   15.63
  -2   8  -3  647.65   14.27
  -2   8   3  611.11   14.21
   3   8   3 1398.08   23.07
   3   8  -3 1402.65   27.46
  -3   8   3 1411.44   25.39
   3   8  -3 1371.59   23.49
   3   8   3 1366.18   27.71
  -4   8   3  117.75    5.61
   4  -8  -3  124.80    4.56
   4   8   3  107.87    8.41
   4   8  -3  112.74    8.20
   4   8   3  117.78    4.25
   4  -8   3  112.94    5.40
   4   8  -3  124.11    4.59
   5   8   3  104.51    4.33
   5  -8   3  107.31    4.90
   5  -8  -3  101.75    4.78
   5  -8  -3  105.32    4.57
   5   8  -3  110.07    7.51
   5   8  -3  104.33    4.56
   5   8   3  113.55    8.34
   5  -8   3  105.77    4.81
   6   8  -3  553.52   11.61
   6  -8   3  538.88   11.64
   6   8   3  528.08   11.19
   6  -8  -3  546.10   11.58
   6   8   3  555.56   15.91
   6   8  -3  543.96   15.39
   6  -8   3  540.55   11.27
   7   8   3   70.38    4.39
   7   8   3   90.69    7.99
   7   8  -3   75.00    4.76
   7  -8  -3   73.53    4.67
   7   8  -3   69.66    7.11
   7  -8   3   66.01    4.35
   8  -8   3    0.14    3.08
   8   8   3   -6.26    5.64
   8  -8  -3   -0.84    3.06
   8   8  -3   -0.10    3.26
   8   8  -3    2.42    5.56
   8   8   3    0.86    3.03
   9  -8   3    2.07    3.31
   9   8   3    1.60    3.34
   9   8  -3    0.82    5.85
   9   8   3    7.29    6.26
   9  -8  -3    6.98    3.38
   9   8  -3    4.77    3.68
  10  -8  -3   15.88    4.07
  10   8   3   19.10    4.11
  10   8  -3   13.85    4.44
  10  -8   3   10.52    3.91
  11  -8   3   13.94    4.29
  11   8  -3   26.91    4.99
  11  -8  -3   10.04    4.27
  11   8   3   29.52    4.72
  12   8   3   44.48    5.81
  12   8  -3   40.53    5.67
  12  -8   3   50.26    5.56
  12  -8  -3   37.15    5.24
   0  -9  -3   -0.56    1.89
   0   9   3    1.44    4.10
   0   9  -3   -1.28    3.81
  -1  -9  -3   22.42    2.28
   1   9  -3   19.49    4.75
  -1   9  -3   15.80    4.13
   1   9   3   15.05    4.83
   1  -9  -3   24.64    2.65
  -1  -9   3   21.15    1.82
  -1   9   3   16.36    4.31
  -2  -9   3  620.90   10.57
   2   9   3  592.82   11.02
  -2   9  -3  605.44   14.18
   2   9   3  597.73   15.77
   2   9  -3  614.27   11.69
  -2  -9  -3  593.48   11.28
  -2   9   3  589.87   14.17
  -3   9   3  199.49    7.76
  -3   9  -3  194.20    7.58
   3   9   3  182.03    9.61
   3   9   3  193.99    5.22
   3   9  -3  207.85    9.56
   3   9  -3  194.56    5.63
  -4   9   3   -1.97    2.81
   4   9   3   -2.46    2.01
   4  -9   3   -1.55    2.76
   4   9   3    3.15    4.96
   4  -9  -3   -1.64    2.08
   4   9  -3    2.31    2.50
   4   9  -3   -3.42    4.66
   5   9   3  101.59    4.35
   5  -9  -3   89.89    4.47
   5  -9  -3   83.62    4.91
   5   9   3   89.97    7.69
   5   9  -3  103.68    7.62
   5   9  -3  105.37    4.62
   5  -9   3   98.96    5.14
   6   9  -3   56.03    6.82
   6   9   3   45.24    6.80
   6   9   3   53.20    3.71
   6  -9  -3   49.10    3.78
   6  -9   3   52.27    3.74
   6  -9   3   54.46    3.72
   6   9  -3   47.32    3.84
   7   9   3   11.52    6.21
   7  -9   3    3.71    2.72
   7   9   3    6.20    3.09
   7  -9  -3    7.80    3.13
   7   9  -3    3.60    3.06
   7   9  -3   13.38    5.90
   8   9   3  389.44    9.68
   8  -9  -3  379.61    9.97
   8  -9   3  375.82    9.95
   8   9   3  394.66   14.62
   8   9  -3  389.32   14.03
   8   9  -3  376.97   10.02
   9   9   3   65.12    4.79
   9  -9  -3   64.71    4.91
   9  -9   3   66.57    5.02
   9   9   3   62.43    8.28
   9   9  -3   69.25    5.12
   9   9  -3   55.19    7.81
  10   9   3   12.12    4.33
  10   9  -3   19.57    4.39
  10  -9  -3   18.56    4.20
  10  -9   3   15.96    4.19
  11   9   3    7.65    4.25
  11  -9  -3   -3.40    3.79
  11  -9   3   -0.41    3.93
  11   9  -3    9.35    4.51
  12   9   3   62.13    6.05
  12  -9  -3   66.49    6.03
  12   9  -3   71.77    6.46
  12  -9   3   65.15    6.04
   0 -10  -3 1920.95   32.32
   0  10   3 1903.40   35.76
   0  10  -3 1875.67   35.39
   0 -10   3 1915.60   31.82
  -1  10  -3   11.13    4.26
   1  10  -3    8.21    4.62
  -1 -10   3   11.48    1.72
   1 -10  -3   14.22    2.46
  -1  10   3    2.06    4.12
  -1 -10  -3   11.28    2.29
   1  10   3    9.45    4.78
   2  10  -3  125.62    8.35
  -2 -10   3  124.60    3.41
  -2  10   3  126.32    7.39
  -2 -10  -3  118.68    4.15
   2  10   3  114.91    8.39
   2  10  -3  119.07    4.49
  -2  10  -3  125.58    7.28
   3  10  -3  113.28    7.72
  -3  10  -3   97.26    6.53
   3  10   3  106.77    4.21
  -3  10   3  102.68    6.74
   3  10  -3  108.10    4.42
   3  10   3   92.19    7.46
   4  10  -3  402.07    9.18
   4  10   3  389.78    8.57
   4  10  -3  393.59   13.30
   4 -10   3  397.99   10.44
  -4  10   3  408.67   10.77
   4 -10  -3  389.06    8.85
   4  10   3  385.81   13.57
   5 -10  -3   63.69    4.10
   5  10   3   57.97    3.92
   5  10  -3   60.30    6.99
   5 -10   3   68.38    4.53
   5  10   3   59.20    7.21
   5  10  -3   58.81    4.11
   6  10   3   20.83    3.16
   6 -10  -3    9.18    2.97
   6  10   3   20.98    6.49
   6 -10   3    9.80    3.14
   6 -10   3   18.79    3.20
   6  10  -3   15.37    3.14
   6  10  -3   13.04    5.95
   7 -10  -3   82.00    4.99
   7  10   3   93.52    8.68
   7 -10   3   77.70    5.10
   7  10  -3   71.29    7.92
   7  10  -3   74.26    4.88
   7  10   3   85.59    4.61
   8  10   3    5.96    3.48
   8 -10  -3    2.54    3.19
   8  10  -3   -1.36    6.04
   8 -10   3    1.29    3.31
   8  10   3    3.73    6.31
   8  10  -3    2.71    3.64
   9  10   3   51.92    4.60
   9 -10   3   44.24    4.66
   9  10   3   45.40    8.09
   9 -10  -3   50.49    4.74
   9  10  -3   57.14    4.98
   9  10  -3   51.81    7.77
  10 -10  -3   36.50    4.66
  10 -10   3   30.24    4.62
  10  10  -3   25.77    4.71
  10  10   3   34.58    4.62
  10  10   3   24.12    7.81
  11 -10   3  125.05    7.10
  11  10   3  139.48    7.12
  11  10  -3  129.56    7.41
  11 -10  -3  132.69    7.15
  12 -10  -3   44.51    5.70
  12 -10   3   64.57    6.12
  12  10  -3   68.35    6.49
   0  11   3    0.52    4.48
   0 -11   3    1.54    1.94
   0 -11  -3   -0.64    2.11
   0  11  -3    7.77    4.58
  -1  11   3   28.55    5.15
  -1  11  -3   13.16    4.54
   1 -11  -3   15.62    2.63
   1  11   3   14.47    5.20
  -1 -11   3   14.95    1.99
  -1 -11  -3   19.45    2.44
   1  11  -3    5.40    4.82
   2  11   3  427.16   13.96
   2  11  -3  424.32   13.73
  -2 -11  -3  427.02    8.94
  -2  11  -3  426.58   12.48
  -2  11   3  445.05   12.66
   3  11   3    1.23    5.19
  -3  11   3    1.08    3.77
  -3  11  -3   -2.86    3.59
   3  11  -3   -6.18    4.71
   3  11   3   -0.48    2.13
   3  11  -3    0.21    2.34
   4  11  -3   67.68    7.21
  -4  11   3   70.92    5.44
   4  11   3   65.04    7.47
   4  11   3   63.18    3.86
   4 -11   3   67.73    5.15
   4  11  -3   73.50    4.22
   5 -11  -3  132.83    5.33
   5 -11   3  128.60    6.38
   5  11   3  128.22    5.08
   5  11  -3  142.06    5.50
   5  11   3  133.02    9.94
   5  11  -3  139.03    9.75
   6  11   3  106.04    5.08
   6  11   3  102.34    9.11
   6 -11   3  107.45    5.40
   6  11  -3   92.28    8.49
   6 -11  -3  118.69    5.34
   6 -11   3  108.37    5.62
   6  11  -3  103.30    5.21
   7  11  -3    9.10    3.30
   7 -11   3    7.64    3.36
   7  11  -3    7.26    6.20
   7  11   3    3.79    6.42
   7  11   3    1.22    3.12
   7 -11  -3    2.64    2.95
   8 -11   3   42.60    4.47
   8  11  -3   37.21    4.41
   8  11  -3   40.89    7.50
   8  11   3   33.85    7.84
   8 -11  -3   41.72    4.18
   8  11   3   46.14    4.42
   9  11  -3   -2.15    6.40
   9  11  -3   13.06    4.09
   9  11   3    7.39    3.95
   9 -11  -3    1.15    3.55
   9 -11   3   10.82    3.82
   9  11   3   -0.99    6.90
  10 -11  -3   31.58    4.55
  10  11   3   35.27    5.07
  10  11   3   25.99    8.03
  10  11  -3   31.19    4.91
  10 -11   3   26.66    4.59
  11 -11   3   38.19    5.28
  11 -11  -3   43.05    5.29
  11  11  -3   51.00    5.72
   0  12   3    3.89    4.94
   0  12  -3    8.21    4.84
   0 -12   3    5.54    2.03
   0 -12  -3   10.67    2.55
  -1  12  -3   76.81    6.63
   1 -12  -3   64.79    4.03
  -1  12   3   75.80    6.65
   1  12  -3   72.78    6.88
   1  12   3   71.27    7.26
  -1 -12  -3   70.72    4.04
  -2  12   3  347.80   11.75
   2  12  -3  327.45   12.51
  -2 -12  -3  340.80    7.81
   2  12   3  325.03   13.03
  -2  12  -3  370.57   11.81
  -3  12   3  118.29    7.75
   3  12  -3  121.27    5.19
   3  12   3  132.25    9.61
  -3  12  -3  125.17    7.72
   3  12   3  123.26    4.63
   3  12  -3  120.92    8.63
   4  12   3  417.16   14.86
   4  12  -3  435.32   14.68
  -4  12   3  414.11   11.93
   4  12   3  411.51    9.22
   4  12  -3  421.87    9.71
   5  12   3   20.97    3.09
   5  12   3    9.37    6.32
   5  12  -3   12.26    3.16
   5  12  -3    9.42    6.08
   5 -12   3   10.55    3.80
   5 -12  -3   10.64    2.97
   6  12   3   36.36    7.51
   6 -12   3   32.88    3.81
   6  12  -3   41.92    7.28
   6  12   3   29.96    3.59
   6  12  -3   33.18    4.09
   6 -12  -3   29.33    3.55
   7  12  -3  123.61    6.17
   7  12   3  125.16    5.76
   7 -12   3  106.44    5.78
   7 -12  -3  110.29    5.86
   7  12   3  118.47   10.04
   7  12  -3  115.80    9.47
   8  12   3    8.29    7.08
   8  12   3    7.11    3.63
   8  12  -3   10.22    6.86
   8  12  -3    9.64    4.07
   8 -12  -3    2.01    3.28
   8 -12   3    4.66    3.47
   9 -12  -3    1.43    3.63
   9  12  -3   -5.77    3.69
   9  12  -3    1.83    6.74
   9 -12   3   -5.79    3.38
   9  12   3   -3.07    6.93
  10  12   3   58.08    9.29
  10 -12   3   59.93    5.50
  10 -12  -3   59.23    5.34
  10  12  -3   61.93    5.72
  11 -12  -3   28.24    4.91
  11 -12   3   23.19    4.85
  11  12  -3   34.20    5.39
   0  13  -3    1.44    4.96
   0 -13  -3   -2.00    2.39
   0  13   3    0.00    5.03
  -1 -13  -3   38.50    3.28
  -1  13   3   37.32    5.92
  -1  13  -3   42.87    6.11
   1  13  -3   34.17    6.17
   1 -13  -3   36.33    3.38
   1  13   3   35.90    6.51
  -2  13  -3  233.90   10.10
   2  13   3  238.17   11.57
   2  13  -3  211.28   10.98
   2 -13  -3  241.38    7.41
  -2  13   3  238.17   10.38
   3  13   3   -1.75    5.80
  -3  13   3   -3.23    4.10
   3  13  -3   -3.38    5.40
   3  13  -3    1.24    2.89
  -3  13  -3    0.66    4.24
   4  13  -3   23.13    6.60
   4  13   3   13.78    6.49
  -4  13   3    5.21    4.25
   4  13  -3   10.08    3.28
   4  13   3   17.36    2.97
   5  13  -3   85.45    4.96
   5  13   3   87.03    4.72
   5  13   3   91.71    9.05
   5  13  -3   96.51    8.77
   5 -13  -3   87.69    5.12
   5 -13   3   92.95    6.55
   6  13  -3   59.21    4.72
   6 -13  -3   53.39    4.31
   6 -13   3   52.14    4.59
   6  13  -3   56.10    8.12
   6  13   3   62.78    8.51
   7 -13  -3   77.84    5.21
   7 -13   3   66.24    4.95
   7  13   3   83.13    9.41
   7  13  -3   75.33    5.62
   7  13  -3   83.32    8.89
   8  13  -3    5.31    6.83
   8 -13   3    4.68    3.58
   8 -13  -3    0.27    3.43
   8  13  -3    2.95    3.83
   8  13   3   -3.38    7.07
   9 -13   3    1.81    3.80
   9  13  -3   -1.96    6.76
   9 -13  -3   -2.24    3.48
   9  13   3   13.40    7.93
   9  13  -3    2.75    4.33
  10 -13  -3   76.35    5.83
  10 -13   3   82.08    6.30
  10  13  -3   96.17    6.69
  10  13   3  105.06   10.84
   0  14   3   24.05    6.15
   0 -14  -3   25.99    3.40
   0  14  -3   36.63    6.52
  -1  14  -3   77.71    7.25
  -1  14   3   71.11    7.15
   1  14   3   71.31    7.90
   1  14  -3   67.85    7.50
   1 -14  -3   67.52    4.64
   2  14   3   40.74    7.36
  -2  14  -3   28.52    5.79
   2 -14  -3   39.12    3.87
  -2  14   3   34.98    6.06
   2  14  -3   34.63    6.64
   3  14  -3   92.16    8.50
   3  14   3   90.97    8.90
  -3  14  -3  100.01    7.33
  -3  14   3   93.85    7.26
   4  14   3  244.06   12.82
   4  14  -3  225.69   12.08
   4  14  -3  242.90    7.57
  -4  14   3  262.35   10.30
   5  14  -3  818.25   22.35
   5  14   3  798.13   22.70
   5 -14  -3  823.82   16.34
   5 -14   3  790.47   18.18
   5  14  -3  823.35   16.52
   6  14   3  108.78   10.12
   6 -14   3   98.53    5.59
   6 -14  -3  105.96    5.51
   6  14  -3  106.36    5.63
   6  14  -3   97.48    9.53
   7 -14  -3  198.79    7.30
   7  14  -3  205.96    7.49
   7  14   3  197.32   12.70
   7  14  -3  180.93   11.87
   7 -14   3  192.03    7.40
   8 -14  -3   69.02    5.14
   8  14  -3   71.68    5.72
   8  14  -3   64.82    9.04
   8  14   3   76.29    9.78
   8 -14   3   58.03    5.14
   9 -14  -3   91.16    6.05
   9  14  -3  105.91   10.40
   9  14   3  114.20   11.05
   9 -14   3   97.74    6.36
  10 -14  -3   62.64    5.70
  10 -14   3   56.70    5.59
  10  14   3   67.63   10.19
   0  15   3    0.68    5.53
   0  15  -3   -0.41    5.46
   1  15  -3 1105.18   26.43
  -1  15  -3 1157.30   25.93
   1  15   3 1122.50   26.81
  -1  15   3 1132.46   25.97
   2 -15  -3   23.30    3.84
   2  15  -3   29.06    6.70
  -2  15  -3   31.58    6.05
  -2  15   3   18.91    5.81
   2  15   3   27.15    7.07
   3 -15  -3   18.79    3.91
   3  15   3   13.55    6.73
   3  15  -3   17.46    6.61
  -3  15   3   21.26    5.64
  -3  15  -3   22.01    5.61
   4  15  -3   -1.75    6.10
  -4  15   3   -4.74    4.59
   4  15   3   -3.09    6.64
   4  15  -3    1.21    3.49
   5 -15   3    2.62    4.13
   5  15  -3   -0.40    3.56
   5  15   3    2.24    6.81
   5  15  -3   11.62    6.86
   5 -15  -3    0.10    2.88
   6 -15  -3   51.79    4.56
   6  15  -3   48.28    8.44
   6 -15   3   57.36    4.66
   6  15  -3   51.94    4.89
   6  15   3   43.59    8.69
   7 -15   3   43.51    4.59
   7  15   3   50.82    9.21
   7  15  -3   63.99    9.04
   7 -15  -3   45.43    4.54
   8  15  -3   -3.39    7.16
   8 -15   3    6.19    3.80
   8  15   3   12.26    8.01
   8 -15  -3    7.44    3.74
   9  15   3   -0.32    8.01
   9 -15   3   -1.19    3.84
   9  15  -3    9.95    7.81
   9 -15  -3   -6.26    3.51
   0  16  -3    1.12    5.74
   0  16   3    2.49    5.78
  -1  16  -3  467.67   15.41
  -1  16   3  441.34   15.37
   1  16  -3  448.68   15.88
   1  16   3  420.92   15.76
  -2  16   3  110.08    8.82
   2  16  -3  121.18    9.56
  -2  16  -3  104.84    8.47
   2  16   3  105.19    9.62
   3  16  -3   17.69    6.84
   3 -16  -3   17.94    4.13
  -3  16  -3   21.02    5.78
   3  16   3    7.30    6.62
  -3  16   3   12.81    5.69
   4  16  -3   11.83    6.96
  -4  16   3   17.02    5.58
   4  16   3   29.75    7.78
   5 -16   3   11.59    4.76
   5  16   3   15.76    7.57
   5 -16  -3   14.07    3.37
   5  16  -3    7.95    7.14
   6 -16  -3    2.89    3.24
   6  16   3   -1.02    7.47
   6  16  -3   -7.71    6.56
   6 -16   3    2.10    3.33
   7 -16   3  283.56    9.17
   7  16   3  282.58   15.14
   7 -16  -3  292.75    9.19
   7  16  -3  282.34   14.56
   8 -16  -3   59.88    5.21
   8 -16   3   61.42    5.29
   8  16   3   66.73   10.13
   8  16  -3   65.51    9.85
   9  16  -3   -2.02    7.69
   9 -16  -3   -0.67    3.94
   9 -16   3   -2.47    3.87
   9  16   3    4.26    8.33
   0  17  -3    0.61    6.02
   0  17   3   -6.11    5.72
   1  17   3   53.31    8.14
  -1  17   3   66.97    8.06
   1  17  -3   65.57    8.25
  -1  17  -3   60.78    7.92
  -2  17   3   63.31    7.88
   2  17   3   48.23    8.08
   2  17  -3   29.88    7.37
  -2  17  -3   45.39    7.23
   3  17   3  140.39   11.09
   3  17  -3  115.92    9.86
  -3  17  -3  126.79    9.49
  -3  17   3  126.57    9.62
   4 -17  -3   96.26    6.41
   4  17  -3  118.90   10.36
  -4  17   3  127.53    8.88
   4  17   3  114.19   10.49
   5  17   3   19.96    7.99
   5  17  -3    7.59    7.21
   6  17   3  121.03   11.37
   6 -17   3  124.81    6.65
   6  17  -3  129.73   11.08
   7 -17   3   43.63    4.97
   7  17   3   39.89    9.26
   7  17  -3   22.34    8.47
   8  17   3   62.57   10.18
   8 -17   3   66.27    5.59
   8 -17  -3   62.24    5.38
   8  17  -3   71.36   10.01
   0  18  -3    5.19    6.32
   0  18   3   10.06    6.68
  -1  18  -3  180.95   11.34
   1  18   3  169.83   11.50
  -1  18   3  168.34   11.43
   1  18  -3  179.78   11.73
  -2  18  -3  274.45   12.86
  -2  18   3  286.46   13.20
   2  18  -3  294.94   14.05
   2  18   3  282.03   14.20
  -3  18  -3  158.82   10.51
   3  18  -3  178.00   11.88
   3  18   3  161.52   12.01
  -3  18   3  183.87   11.08
   4  18   3   17.28    7.85
   4  18  -3   15.43    7.34
  -4  18   3    7.11    5.97
   5  18  -3   28.90    7.92
   5  18   3    9.48    7.89
   5 -18  -3   23.01    5.12
   6  18  -3   27.07    8.31
   6  18   3   26.86    8.86
   6 -18   3   39.43    4.63
   7  18  -3   29.67    8.68
   7 -18   3   14.77    4.20
   7  18   3   10.03    8.45
   0  19   3    1.50    6.94
   0  19  -3   -3.72    6.29
   1  19  -3   28.37    7.80
   1  19   3   38.63    8.28
  -1  19  -3   40.85    7.74
  -1  19   3   29.37    7.69
  -2  19   3   30.54    7.36
   2  19  -3   23.33    7.54
   2  19   3   17.13    7.64
  -2  19  -3   29.64    7.19
  -3  19   3   30.94    7.40
  -3  19  -3   44.47    7.62
   3  19   3   40.88    8.78
   3  19  -3   52.78    8.95
   4  19   3    1.36    7.65
   4  19  -3    1.58    7.18
   5  19   3   15.16    8.27
   5  19  -3   24.33    8.22
   6  19   3   57.64   10.17
   6  19  -3   86.05   10.50
   0  20  -3   71.51    9.12
   0  20   3   65.50    9.37
  -1  20  -3   22.89    7.38
  -1  20   3   25.59    7.98
   1  20  -3   27.97    7.89
   1  20   3   16.58    7.67
   2  20   3   48.84    8.96
  -2  20   3   55.29    8.53
   2  20  -3   42.39    8.71
  -2  20  -3   44.52    8.00
  -3  20   3   -1.41    6.58
  -3  20  -3   -3.58    6.24
   3  20  -3    5.39    7.14
   3  20   3   10.55    7.82
   4  20  -3   21.26    8.18
   4  20   3   11.23    8.07
   5  20   3   29.19    9.12
   5  20  -3   33.82    8.94
   0  21   3   -3.34    7.19
   0  21  -3    2.99    7.16
  -1  21  -3   77.17    9.59
  -1  21   3   81.28    9.82
   1  21  -3   69.14    9.53
   1  21   3   68.19    9.95
  -2  21  -3   10.07    7.01
  -2  21   3    4.13    7.19
   2  21   3    2.13    7.63
   2  21  -3   -0.76    7.09
  -3  21  -3   42.45    8.29
   3  21   3   37.85    9.11
   3  21  -3   38.16    8.77
  -3  21   3   42.39    8.32
   0   0  -4 5518.77   91.52
   0   0  -4 5487.28   89.05
   0   0   4 5546.56   89.33
   1   0  -4 1995.64   31.31
   1   0   4 2000.68   32.08
   2   0   4 1030.40   16.80
   2   0  -4 1036.25   16.91
   2   0   4 1044.24   17.73
   3   0   4  532.16    9.52
   3   0  -4  524.92    9.69
   3   0   4  517.61   10.72
   3   0  -4  526.86    9.70
   4   0  -4   17.64    2.25
   4   0  -4   16.06    2.35
   4   0   4   18.81    2.18
   4   0   4   15.89    2.88
   5   0   4  475.00   11.09
   5   0  -4  498.77    9.79
   5   0  -4  491.63    9.78
   5   0   4  488.08    9.77
   6   0   4  243.75    6.34
   6   0  -4  251.94    6.72
   6   0  -4  237.94    6.57
   6   0   4  247.37    7.96
   7   0   4  142.62    6.84
   7   0  -4  136.94    5.65
   7   0  -4  139.66    5.19
   7   0   4  133.48    5.32
   8   0  -4   86.49    5.06
   8   0   4   88.65    4.90
   8   0   4   89.05    6.71
   9   0   4   22.54    3.74
   9   0  -4   22.39    3.50
  10   0  -4    3.32    3.27
  10   0   4    5.09    3.47
  11   0  -4  336.59   10.05
  11   0   4  330.03    9.87
  12   0   4   37.78    5.03
  12   0  -4   43.95    5.21
  13   0  -4   11.59    4.60
  13   0   4   14.39    4.76
   0  -1   4   -1.33    1.05
   0   1   4   -0.38    1.42
   0   1  -4   -0.52    0.88
   0  -1  -4   -1.38    0.95
   1  -1  -4    1.64    1.01
   1   1   4   -0.26    0.70
   1   1  -4    4.04    1.56
   1   1  -4    1.27    1.13
   1  -1   4    0.67    1.25
   1   1   4   -0.66    1.94
   2   1  -4  159.89    4.78
   2  -1   4  161.80    4.49
   2  -1  -4  160.97    3.77
   2   1   4  168.94    5.81
   2   1  -4  164.72    4.04
   2   1   4  161.89    3.77
   3  -1   4  810.73   14.30
   3  -1   4  796.86   13.73
   3   1   4  805.87   13.67
   3   1  -4  789.44   13.82
   3   1   4  795.85   15.28
   3   1  -4  820.76   14.47
   3  -1  -4  810.62   13.84
   4   1   4   10.60    1.97
   4   1   4    8.29    3.15
   4   1  -4   13.32    1.99
   4  -1  -4   12.28    2.18
   4  -1   4    8.97    2.08
   4  -1   4   15.34    2.62
   4   1  -4   10.49    2.73
   5  -1  -4   30.59    2.58
   5  -1  -4   41.41    2.55
   5   1   4   32.97    4.06
   5  -1   4   34.49    2.77
   5   1  -4   36.53    3.33
   5   1  -4   36.16    2.89
   5  -1   4   37.10    3.40
   5   1   4   32.77    2.66
   6  -1   4    6.49    2.39
   6  -1  -4    7.22    2.54
   6   1  -4    3.73    2.19
   6   1   4    9.54    2.48
   6   1  -4    7.36    3.04
   6  -1  -4    9.34    2.37
   6   1   4    7.84    3.61
   6  -1   4    6.29    3.01
   7   1  -4   72.77    4.45
   7  -1  -4   71.32    4.42
   7   1  -4   82.69    5.41
   7   1   4   91.40    6.48
   7  -1   4   79.16    5.78
   7   1   4   67.52    4.24
   7  -1   4   69.20    4.02
   8  -1  -4   62.85    4.30
   8  -1   4   68.37    5.25
   8   1   4   69.34    4.55
   8  -1   4   62.29    4.28
   8   1   4   83.32    6.01
   8   1  -4   73.59    4.81
   9  -1   4  549.01   12.46
   9   1  -4  543.93   12.48
   9   1   4  550.69   12.23
   9  -1  -4  545.93   12.53
  10   1   4   67.55    4.80
  10  -1   4   71.43    5.28
  10   1  -4   77.84    5.59
  10  -1  -4   76.81    5.47
  11  -1  -4   12.47    4.17
  11  -1   4   15.63    4.14
  11   1  -4   11.97    4.15
  11   1   4    9.43    3.91
  12   1  -4   71.58    5.83
  12  -1   4   60.57    5.58
  12   1   4   65.13    5.57
  12  -1  -4   61.87    5.31
  13   1   4   -3.83    4.16
  13  -1   4    8.90    4.68
  13  -1  -4   -1.18    4.29
  13   1  -4    6.42    4.65
   0   2  -4  156.61    4.60
   0  -2  -4  154.65    3.53
   0   2   4  160.60    5.00
   1   2  -4 2732.40   44.33
   1  -2  -4 2849.60   43.10
  -1  -2  -4 2775.16   44.72
  -1   2   4 2735.84   44.40
   1   2   4 2702.15   43.91
   1  -2   4 2773.18   43.85
   1   2   4 2745.93   44.72
   2   2  -4   60.58    3.54
   2  -2   4   53.33    3.06
   2   2  -4   48.38    2.52
   2   2   4   50.00    2.36
   2  -2  -4   58.17    2.64
   2   2   4   52.10    3.94
   3  -2   4  187.83    4.90
   3   2   4  187.63    7.10
   3  -2   4  189.34    4.65
   3   2  -4  177.31    4.82
   3   2   4  187.27    4.43
   3  -2  -4  187.31    4.56
   3   2  -4  186.94    6.41
   4  -2   4    5.36    2.13
   4  -2  -4    6.09    1.82
   4   2  -4    8.57    3.02
   4   2   4    8.95    1.93
   4  -2   4    2.63    2.01
   4   2  -4    3.29    2.06
   4   2   4    4.59    3.51
   5   2  -4   22.32    3.42
   5   2   4   20.05    4.01
   5  -2   4   16.66    2.27
   5   2  -4   22.99    2.66
   5   2   4   22.12    2.47
   5  -2   4   25.80    2.82
   5  -2  -4   21.91    2.63
   6   2  -4  236.44    7.85
   6  -2   4  247.57    6.63
   6  -2   4  258.15    7.27
   6   2   4  251.42    8.85
   6   2   4  245.31    6.49
   6  -2  -4  242.56    6.65
   6   2  -4  241.55    6.67
   7   2   4  400.63    9.24
   7   2  -4  396.95   10.49
   7  -2   4  404.31    9.27
   7   2   4  392.93   11.47
   7   2  -4  392.58    9.39
   7  -2   4  416.54   10.16
   7  -2  -4  411.61    9.51
   8  -2   4  544.47   11.92
   8   2   4  540.26   11.73
   8  -2  -4  538.42   11.94
   8   2   4  529.75   13.97
   8   2  -4  525.55   11.89
   9  -2   4   81.44    4.93
   9  -2  -4   86.82    5.32
   9   2  -4   76.65    5.27
   9   2   4   92.18    5.25
  10  -2   4   -0.19    3.50
  10  -2  -4    6.56    3.54
  10   2   4    7.95    3.59
  10   2  -4    3.21    3.61
  11   2   4    7.75    3.84
  11  -2  -4    4.39    3.83
  11   2  -4    5.32    4.00
  11  -2   4   -4.18    3.24
  12   2   4    5.54    4.25
  12  -2   4    5.72    4.20
  12   2  -4    3.11    3.79
  12  -2  -4    4.47    4.22
  13   2   4   -2.70    4.16
  13  -2   4    4.83    4.46
  13  -2  -4   -4.09    4.12
  13   2  -4    2.88    4.55
   0  -3  -4   -2.04    1.37
   0   3   4    0.19    2.79
   0   3  -4    0.38    2.40
   1   3  -4   12.71    1.57
   1  -3   4   15.73    2.41
   1  -3  -4   11.90    1.33
   1   3   4   14.02    3.32
  -1   3   4   13.40    2.67
   1   3   4   13.88    1.07
   1   3  -4   14.11    2.97
  -1  -3  -4   13.83    1.71
   2  -3   4  542.21   10.07
   2  -3  -4  560.00    9.53
   2   3  -4  537.51   11.55
   2   3  -4  531.39    9.62
  -2   3   4  540.37   10.08
   2   3   4  550.90   12.09
   2   3   4  533.64    9.24
   3  -3  -4   55.36    2.46
   3   3   4   51.07    2.58
   3  -3  -4   61.22    3.05
   3   3  -4   63.89    4.26
   3  -3   4   52.71    3.14
   3   3   4   54.35    4.61
   3   3  -4   52.71    2.80
   4  -3  -4   58.42    3.35
   4  -3  -4   59.72    2.08
   4   3  -4   53.55    3.07
   4   3   4   60.19    3.09
   4  -3   4   64.39    3.50
   4  -3   4   56.51    3.32
   4   3  -4   62.64    4.43
   4   3   4   57.78    4.85
   5   3  -4  766.72   13.99
   5   3   4  760.28   13.70
   5  -3  -4  754.23   13.97
   5   3  -4  751.02   15.62
   5  -3   4  736.00   13.89
   5  -3   4  749.91   13.88
   5   3   4  765.48   16.40
   6   3   4   -3.33    2.18
   6   3  -4    1.29    3.46
   6  -3  -4    0.35    2.26
   6  -3   4    2.19    2.09
   6   3  -4    0.58    2.44
   6   3   4   -3.21    3.78
   6  -3   4    0.28    2.40
   7  -3   4 1045.88   19.33
   7  -3  -4 1027.69   19.10
   7  -3   4 1014.96   19.05
   7   3   4 1074.51   21.75
   7   3  -4 1024.90   20.53
   7   3   4 1032.41   18.86
   7   3  -4 1033.43   19.02
   8   3  -4    6.39    3.26
   8  -3   4   12.30    2.91
   8   3   4   19.91    3.33
   8   3   4   10.82    4.91
   8  -3  -4    4.60    2.78
   9   3   4 1104.41   20.85
   9  -3   4 1120.47   21.14
   9  -3  -4 1099.82   21.08
   9   3  -4 1094.91   21.02
  10   3  -4  105.21    6.05
  10   3   4  111.15    5.88
  10  -3  -4   97.36    5.80
  10  -3   4   92.91    5.82
  11  -3  -4   64.52    5.37
  11   3   4   72.81    5.51
  11   3  -4   73.36    5.55
  11  -3   4   65.20    5.37
  12  -3   4   33.89    4.93
  12  -3  -4   32.09    4.96
  12   3  -4   30.52    4.61
  12   3   4   39.74    5.07
  13  -3  -4   23.02    4.99
  13  -3   4   18.62    4.99
  13   3  -4   32.05    5.47
  13   3   4   19.91    4.86
   0   4   4 7469.41  117.67
   0  -4  -4 7399.02  122.76
   0   4  -4 7505.44  117.39
  -1   4   4  680.22   13.38
  -1   4  -4  646.10   12.99
   1   4  -4  681.96   11.73
   1   4   4  663.32   14.12
   1   4   4  679.74   11.09
  -1  -4  -4  697.13   11.93
   2   4   4 1067.44   17.67
   2   4  -4 1107.03   20.35
   2  -4  -4 1111.32   17.97
   2   4   4 1093.80   20.91
   2  -4   4 1104.01   19.03
  -2   4   4 1103.15   19.11
   2   4  -4 1093.46   18.23
   3   4   4 1085.95   20.88
   3  -4  -4 1090.67   17.92
   3   4  -4 1063.82   18.03
  -3   4   4 1066.21   18.02
   3   4  -4 1035.69   20.16
   3  -4   4 1050.83   18.24
   3   4   4 1069.99   17.58
   4  -4  -4  176.24    4.97
   4   4   4  177.23    4.59
   4  -4   4  177.24    5.19
   4  -4   4  172.73    4.87
   4   4  -4  177.02    5.05
   4   4  -4  169.44    7.47
   4  -4  -4  177.63    4.03
   4   4   4  183.21    8.02
   5  -4   4    2.02    1.90
   5   4   4   -3.36    3.88
   5  -4   4    2.38    1.91
   5   4   4    1.94    1.97
   5  -4  -4    3.23    1.26
   5   4  -4   -1.08    3.55
   5   4  -4    2.25    2.19
   5  -4  -4    1.34    2.17
   6  -4   4  543.87   11.19
   6  -4  -4  547.69   11.47
   6   4   4  570.98   11.21
   6  -4  -4  590.27   10.12
   6  -4   4  566.33   11.58
   6   4   4  544.13   14.24
   6   4  -4  564.79   13.56
   6   4  -4  542.89   11.44
   7   4   4  600.25   12.20
   7   4  -4  592.60   14.48
   7  -4  -4  588.54   12.47
   7  -4   4  588.07   12.52
   7   4  -4  608.50   12.62
   7   4   4  593.58   15.36
   7  -4   4  615.54   12.48
   8   4  -4   52.20    5.58
   8   4   4   42.81    5.95
   8   4  -4   42.79    3.78
   8   4   4   35.80    3.66
   8  -4   4   37.24    3.90
   8  -4  -4   41.11    4.00
   9   4   4   -0.80    3.18
   9   4   4   -2.76    5.04
   9   4  -4   -3.45    3.31
   9  -4  -4   -2.78    3.10
   9  -4   4   -0.77    2.82
  10  -4   4  104.22    5.99
  10   4   4  110.78    5.90
  10   4  -4  107.89    6.21
  10  -4  -4  112.15    6.05
  11   4  -4  419.73   11.74
  11  -4   4  436.46   11.77
  11   4   4  433.97   11.46
  11  -4  -4  416.64   11.56
  12   4  -4   37.65    5.27
  12  -4  -4   32.79    4.94
  12   4   4   30.37    4.97
  12  -4   4   34.78    5.07
  13   4   4    4.21    4.58
  13   4  -4    5.87    4.74
  13  -4  -4    1.74    4.42
  13  -4   4   -4.25    3.79
   0  -5  -4   -1.37    1.60
   0   5  -4    1.95    3.10
   0   5   4    2.04    3.42
   1   5  -4   -1.98    1.74
   1   5   4   -5.99    3.55
  -1   5   4    3.22    3.18
  -1  -5  -4   -1.99    1.63
   1   5   4   -2.28    1.25
  -1   5  -4   -2.87    2.77
   1   5  -4   -4.24    3.29
   2   5   4  547.70    9.62
   2  -5   4  568.83   11.42
   2  -5  -4  573.19   10.00
   2   5  -4  549.02   10.22
   2   5  -4  553.68   12.81
  -2   5   4  561.34   11.56
   2   5   4  541.93   13.31
   3   5  -4  230.49    5.61
   3  -5   4  234.52    6.19
   3   5   4  234.29    9.07
  -3   5   4  231.86    6.31
   3   5  -4  215.72    8.22
   3  -5  -4  235.82    5.50
   3   5   4  231.53    5.10
   4  -5  -4  342.22    7.35
   4   5  -4  332.48    7.39
   4  -5  -4  334.41    6.95
   4   5  -4  338.55   10.07
   4   5   4  327.55    6.88
   4  -5   4  321.97    7.37
   4   5   4  323.75   10.65
   5   5  -4  142.03    4.97
   5  -5   4  140.69    4.63
   5   5   4  140.21    4.64
   5   5  -4  144.05    7.64
   5  -5  -4  138.34    3.72
   5  -5  -4  141.85    4.86
   5  -5   4  141.05    5.01
   5   5   4  135.10    8.01
   6  -5  -4   27.74    3.00
   6   5  -4   27.62    4.83
   6   5   4   26.91    5.24
   6  -5   4   27.63    2.78
   6   5  -4   28.19    3.14
   6  -5  -4   29.76    2.02
   6   5   4   27.95    2.82
   6  -5   4   24.33    2.77
   7   5  -4  680.39   16.37
   7   5  -4  695.63   14.03
   7  -5   4  689.28   13.69
   7   5   4  694.18   17.43
   7  -5   4  707.00   14.16
   7   5   4  692.64   13.67
   7  -5  -4  686.05   14.00
   8   5  -4    1.94    4.65
   8   5  -4   -0.63    3.12
   8   5   4   -1.16    5.03
   8  -5  -4    7.88    3.11
   8   5   4    4.83    3.06
   8  -5   4    3.68    2.69
   9   5   4    6.53    3.63
   9  -5   4    4.57    3.36
   9  -5  -4    9.43    3.56
   9   5  -4    9.08    3.65
   9   5   4    6.01    5.65
  10   5  -4  167.66    7.11
  10  -5   4  165.15    7.06
  10   5   4  167.09    6.88
  10  -5  -4  160.82    7.00
  11   5   4  722.41   16.10
  11  -5   4  719.05   16.24
  11  -5  -4  705.01   16.13
  11   5  -4  706.71   16.22
  12   5  -4   41.49    5.35
  12  -5  -4   36.91    5.15
  12  -5   4   34.09    4.68
  12   5   4   35.91    5.06
  13  -5   4   27.19    5.17
  13  -5  -4   26.78    5.24
  13   5  -4   26.99    5.50
  13   5   4   27.17    5.30
   0  -6  -4  653.62   11.90
   0   6  -4  650.85   14.04
   0   6   4  642.84   14.42
   1   6   4   22.29    1.65
  -1   6   4   27.48    3.88
   1   6  -4   25.63    4.12
  -1  -6   4   21.69    1.64
  -1   6  -4   21.03    3.47
   1   6  -4   22.68    2.19
   1   6   4   10.26    4.12
  -1  -6  -4   26.12    2.13
   2   6  -4   28.58    4.41
  -2   6   4   28.13    3.52
   2   6  -4   29.36    2.40
   2   6   4   29.87    1.97
  -2   6  -4   34.29    3.45
  -2  -6  -4   34.25    2.19
   2   6   4   25.04    4.69
   3   6  -4 1963.42   32.19
   3   6   4 1950.61   35.83
   3   6   4 1974.83   31.67
   3   6  -4 1979.21   35.39
   3  -6   4 1990.08   33.24
   3  -6  -4 2030.55   32.10
  -3   6   4 1999.07   33.31
   4   6  -4  270.88    9.60
   4   6   4  255.11    9.86
   4   6   4  260.77    6.00
   4  -6   4  263.16    6.66
   4   6  -4  256.73    6.46
   4  -6  -4  264.52    6.38
   5   6  -4  112.77    4.56
   5  -6  -4  107.32    3.76
   5   6  -4  123.49    7.61
   5   6   4  117.69    7.88
   5  -6  -4  108.19    4.44
   5  -6   4  115.43    4.75
   5   6   4  110.15    4.23
   5  -6   4  100.29    4.28
   6   6   4  190.85    9.55
   6   6  -4  181.86    5.83
   6  -6   4  195.97    5.72
   6   6  -4  193.70    9.02
   6  -6  -4  191.44    6.04
   6   6   4  203.97    5.92
   6  -6   4  197.69    6.23
   7   6   4  105.63    4.86
   7  -6   4  111.81    5.09
   7  -6  -4  114.76    5.15
   7   6   4   97.14    7.69
   7   6  -4  109.16    5.25
   7   6  -4  128.15    8.09
   7  -6   4  109.74    5.22
   8  -6  -4   31.27    3.83
   8   6  -4   37.09    5.79
   8  -6   4   34.53    3.85
   8   6   4   28.61    3.58
   8   6  -4   32.76    3.93
   8   6   4   21.88    6.01
   9   6   4  239.59   11.53
   9   6  -4  248.01    8.19
   9  -6   4  261.20    8.30
   9  -6  -4  249.05    8.13
   9   6   4  265.41    8.04
  10  -6   4  189.64    7.49
  10   6  -4  193.17    7.60
  10   6   4  192.46    7.39
  10  -6  -4  199.10    7.35
  11  -6  -4  195.97    8.05
  11  -6   4  198.86    8.07
  11   6   4  210.03    8.10
  11   6  -4  196.53    8.14
  12   6  -4   31.54    5.16
  12  -6  -4   13.66    4.61
  12  -6   4   15.97    4.60
  12   6   4   21.02    4.74
  13   6   4  453.53   13.02
  13  -6  -4  445.57   13.18
  13  -6   4  466.19   13.40
  13   6  -4  477.41   13.53
   0   7   4   -2.49    3.72
   0  -7  -4    1.13    1.74
   0   7  -4    0.24    3.48
   1   7  -4   28.50    4.40
   1   7  -4   32.09    2.41
   1  -7  -4   38.24    2.73
  -1   7   4   29.92    4.24
  -1  -7   4   27.50    1.89
  -1   7  -4   34.05    4.08
  -1  -7  -4   31.65    2.32
   1   7   4   30.59    4.76
   2   7   4    4.40    4.29
  -2   7  -4    8.67    3.16
  -2  -7  -4    8.88    1.89
   2   7  -4   -0.11    3.95
  -2   7   4    5.63    3.29
   2   7   4    6.83    1.71
   2   7  -4    8.65    2.04
  -3   7   4   14.95    3.21
   3  -7  -4   16.96    2.16
   3  -7   4   16.68    3.04
   3   7   4   15.50    1.96
   3   7  -4   16.45    4.50
   3   7  -4   18.25    2.38
   3   7   4    9.61    4.64
   4   7  -4   14.13    4.54
   4  -7  -4    8.80    2.35
   4   7   4    8.12    2.03
   4   7   4   11.79    4.71
   4   7  -4    8.08    2.35
   4  -7   4    8.18    2.48
  -4   7   4    8.54    2.59
   5  -7  -4  281.85    7.17
   5   7   4  297.81   11.06
   5  -7  -4  275.80    6.77
   5  -7   4  282.40    7.22
   5   7  -4  296.47    7.35
   5   7   4  291.19    6.88
   5  -7   4  295.98    7.55
   5   7  -4  287.17   10.56
   6  -7  -4  202.26    6.21
   6   7  -4  191.68    9.43
   6   7  -4  189.51    6.18
   6  -7   4  202.47    6.19
   6   7   4  193.08    5.75
   6   7   4  204.24    9.95
   6  -7   4  194.63    5.87
   7   7  -4   60.85    6.47
   7  -7   4   60.66    4.51
   7   7   4   53.30    3.95
   7  -7  -4   57.18    4.09
   7   7   4   74.03    7.28
   7   7  -4   62.66    4.50
   8  -7  -4   86.14    5.17
   8  -7   4   81.31    4.85
   8   7   4   91.43    4.96
   8   7  -4   87.22    5.28
   8   7   4   95.28    8.27
   8   7  -4   86.48    7.49
   9  -7   4   58.34    4.71
   9   7  -4   62.26    4.94
   9  -7  -4   68.85    4.93
   9   7   4   49.67    7.50
   9   7   4   71.13    4.94
  10  -7   4   51.81    4.86
  10  -7  -4   40.57    4.70
  10   7  -4   48.38    5.05
  10   7   4   38.17    4.48
  11   7   4   24.13    4.50
  11  -7  -4    2.72    3.97
  11  -7   4    3.66    3.99
  11   7  -4   18.11    4.70
  12  -7  -4   33.63    5.14
  12   7   4   25.94    5.06
  12   7  -4   35.17    5.45
  12  -7   4   20.61    4.76
   0   8  -4    1.34    3.75
   0   8   4   -1.30    3.86
   0  -8  -4    4.12    2.01
  -1  -8   4  325.61    6.26
  -1   8   4  335.36   10.23
   1   8   4  323.06   11.03
   1  -8  -4  320.12    7.49
  -1   8  -4  325.19    9.75
  -1  -8  -4  323.38    7.10
   1   8  -4  335.81   10.51
   2   8   4  133.64    8.20
   2   8   4  132.86    3.94
  -2  -8  -4  140.01    4.15
  -2   8  -4  125.49    6.62
   2   8  -4  139.93    7.95
   2   8  -4  131.65    4.66
  -2   8   4  123.44    6.71
  -3   8   4   65.37    4.54
   3   8   4   57.15    3.02
   3   8  -4   57.18    3.55
   3   8   4   47.13    5.80
   3   8  -4   52.69    5.69
  -4   8   4 1274.63   22.84
   4   8  -4 1255.62   25.67
   4   8   4 1244.41   26.24
   4  -8  -4 1291.07   21.78
   4  -8   4 1263.80   22.77
   4   8  -4 1261.70   21.89
   4   8   4 1237.94   21.24
   5  -8  -4  461.14   10.09
   5   8  -4  476.58   13.89
   5   8  -4  456.05   10.11
   5  -8   4  474.28   10.28
   5   8   4  475.54   14.42
   5  -8   4  487.83   10.43
   5   8   4  477.21    9.73
   5  -8  -4  462.96   10.05
   6  -8  -4   61.14    4.16
   6   8  -4   74.62    4.42
   6  -8   4   67.82    4.24
   6  -8   4   71.35    4.49
   6   8   4   63.18    7.03
   6   8   4   68.34    3.85
   6   8  -4   60.77    6.63
   7  -8  -4  257.43    7.48
   7   8   4  247.24   11.48
   7   8  -4  234.98    7.58
   7   8   4  246.98    7.17
   7   8  -4  240.16   10.86
   7  -8   4  254.78    7.66
   8  -8  -4   44.93    4.15
   8   8  -4   55.69    4.57
   8   8   4   35.47    7.02
   8   8  -4   45.03    6.78
   8   8   4   42.33    4.22
   8  -8   4   52.26    4.39
   9  -8  -4    2.58    3.37
   9   8  -4    4.51    3.59
   9   8   4    3.64    3.56
   9  -8   4   -0.49    2.97
   9   8   4    3.88    6.12
  10   8  -4    3.81    4.02
  10  -8  -4    9.73    3.87
  10  -8   4   10.14    4.00
  10   8   4   15.05    3.89
  11   8  -4  267.64    9.39
  11  -8   4  252.83    9.16
  11  -8  -4  232.21    8.79
  11   8   4  243.15    8.73
  12   8   4   22.19    5.15
  12   8  -4   12.37    4.99
  12  -8   4   16.44    4.59
  12  -8  -4    6.49    4.32
   0   9   4    1.28    4.20
   0  -9  -4   -1.27    1.84
   0   9  -4   -1.03    3.92
   1   9  -4  167.93    8.28
  -1   9  -4  175.71    7.80
   1   9   4  156.63    8.78
  -1  -9  -4  163.38    4.83
  -1  -9   4  167.81    4.03
  -1   9   4  158.04    8.06
   1  -9  -4  160.75    5.15
  -2   9   4  364.47   10.67
  -2   9  -4  367.90   10.56
   2   9  -4  370.18    8.21
  -2  -9   4  375.18    6.72
   2   9   4  343.28   11.99
   2   9   4  368.20    7.46
   2   9  -4  355.47   11.66
  -2  -9  -4  359.96    7.67
  -3   9   4    5.43    3.37
   3   9  -4    5.40    2.35
   3   9   4    4.84    4.86
   3   9  -4    7.25    4.73
   3   9   4    5.60    2.04
   4   9  -4   43.52    3.50
   4   9   4   49.68    3.26
   4   9  -4   44.97    6.07
  -4   9   4   49.76    4.24
   4   9   4   53.34    6.50
   4  -9   4   56.57    4.26
   4  -9  -4   52.20    3.77
   5   9   4  628.60   12.10
   5  -9  -4  609.70   12.47
   5  -9   4  620.19   13.05
   5   9  -4  633.67   12.75
   5   9  -4  632.34   16.69
   5   9   4  610.43   17.15
   6   9   4  252.68   11.67
   6  -9   4  257.64    7.63
   6   9   4  248.67    6.80
   6  -9  -4  263.49    7.37
   6  -9   4  275.82    7.43
   6   9  -4  253.73   11.20
   6   9  -4  264.83    7.64
   7  -9  -4  382.13    9.61
   7  -9   4  382.46    9.84
   7   9  -4  366.97    9.53
   7   9   4  382.45   14.20
   7   9   4  387.23    9.31
   7   9  -4  384.78   13.55
   8   9   4  114.92    9.34
   8   9  -4  101.25    8.46
   8   9  -4  124.96    5.96
   8  -9  -4  108.33    5.66
   8   9   4  113.35    5.63
   8  -9   4  116.96    5.62
   9   9   4   37.77    7.53
   9  -9  -4   32.63    4.21
   9   9  -4   40.47    4.55
   9   9   4   25.85    3.91
   9   9  -4   22.20    6.73
   9  -9   4   29.78    4.24
  10  -9   4   -7.58    3.37
  10   9  -4   -6.88    4.13
  10   9   4    8.08    4.17
  10  -9  -4   -0.97    3.59
  11  -9   4   72.38    5.55
  11   9  -4   86.17    6.30
  11   9   4   81.03    6.15
  11  -9  -4   75.61    5.88
  12  -9   4   39.56    5.46
  12   9  -4   54.88    6.08
  12  -9  -4   53.36    5.70
  12   9   4   50.83    5.78
   0  10   4  254.27   10.44
   0 -10  -4  267.81    6.59
   0  10  -4  265.42   10.03
  -1  10  -4   -6.11    3.64
  -1 -10  -4   -0.77    2.10
   1  10   4    1.93    4.59
  -1 -10   4   -0.99    1.39
  -1  10   4   -3.54    3.97
   1 -10  -4   -1.44    2.11
   1  10  -4   -5.47    4.12
  -2  10  -4    9.82    3.93
   2  10  -4    7.17    4.81
  -2 -10   4   12.31    1.45
   2  10  -4   12.17    2.43
  -2  10   4    8.76    4.07
   2  10   4    6.62    4.88
  -2 -10  -4   11.07    2.25
   3  10  -4  395.90   13.09
   3  10   4  388.49   13.33
   3  10   4  397.10    8.28
  -3  10   4  410.39   11.27
   3  10  -4  396.69    8.92
  -3  10  -4  405.94   11.18
   4 -10  -4  317.93    7.64
   4  10  -4  345.22    8.07
  -4  10   4  316.42    9.53
   4  10   4  306.29    7.37
   4  10   4  292.77   12.21
   4  10  -4  303.89   11.92
   4 -10   4  318.18    9.24
   5 -10   4    4.34    2.97
   5  10  -4    2.10    2.70
   5 -10  -4    4.65    2.68
   5  10  -4    9.47    5.34
   5  10   4    5.97    2.48
   5  10   4    3.19    5.59
   6 -10   4  189.97    6.67
   6  10  -4  183.68   10.49
   6  10   4  191.96    6.14
   6 -10  -4  194.71    6.47
   6  10   4  203.67   11.25
   6 -10   4  204.74    6.80
   6  10  -4  209.87    6.70
   7 -10  -4   -1.96    2.77
   7  10  -4    5.54    3.26
   7  10   4   -1.17    2.66
   7  10  -4   -5.60    5.50
   7 -10   4   -6.83    2.84
   7  10   4    0.35    6.04
   8  10   4    0.28    3.29
   8 -10   4   -1.72    3.26
   8  10   4    0.48    6.50
   8 -10  -4    1.06    3.11
   8  10  -4    2.61    3.68
   8  10  -4   -5.38    5.58
   9 -10   4  212.61    7.92
   9  10   4  213.87    7.47
   9  10  -4  221.27   11.74
   9  10  -4  221.22    7.99
   9  10   4  191.16   12.20
   9 -10  -4  209.43    7.64
  10 -10  -4  293.88    9.63
  10  10  -4  315.65   10.02
  10  10   4  302.61   14.60
  10  10   4  315.06    9.54
  10 -10   4  328.67   10.10
  11  10  -4  155.29    7.82
  11 -10  -4  143.78    7.39
  11 -10   4  136.55    7.33
  11  10   4  159.69    7.44
  12 -10   4  131.74    7.68
  12 -10  -4  127.73    7.48
  12  10  -4  140.87    8.13
   0  11   4   -3.36    4.54
   0 -11  -4    2.40    2.27
   0  11  -4    1.49    4.33
   0 -11   4    1.30    1.85
   1 -11  -4  104.31    4.72
   1  11  -4   94.62    7.13
  -1  11  -4   98.09    7.47
  -1  11   4   99.80    7.01
   1  11   4   95.27    7.47
  -1 -11   4  101.07    3.49
  -1 -11  -4  100.79    4.23
  -2  11   4  269.00   10.05
  -2 -11  -4  281.49    6.71
  -2  11  -4  272.23    9.96
   2  11  -4  252.78   10.85
   2  11   4  257.61   11.21
   3  11  -4  163.59    5.55
  -3  11   4  168.82    8.04
  -3  11  -4  168.92    8.03
   3  11  -4  172.29    9.66
   3  11   4  157.04   10.03
   3  11   4  171.60    5.03
   4  11   4   64.94    3.76
   4  11   4   52.39    7.25
  -4  11   4   65.27    5.23
   4  11  -4   67.56    4.50
   4 -11   4   75.65    5.28
   4 -11  -4   59.72    4.08
   4  11  -4   57.87    7.04
   5 -11   4  330.16    9.45
   5 -11  -4  333.94    8.32
   5  11   4  330.28    7.97
   5  11  -4  321.08    8.62
   5  11  -4  313.86   12.70
   5  11   4  342.78   13.55
   6  11  -4  204.78    6.85
   6 -11   4  203.70    7.14
   6 -11  -4  194.75    6.79
   6 -11   4  192.27    6.90
   6  11   4  208.28   11.69
   6  11   4  199.51    6.37
   6  11  -4  219.23   11.18
   7  11  -4   13.84    6.45
   7  11  -4   22.10    3.73
   7 -11   4   24.46    3.80
   7 -11  -4   25.57    3.63
   7  11   4   24.16    3.56
   7  11   4   26.57    7.25
   8  11  -4    8.05    3.71
   8  11   4   -1.08    3.32
   8 -11  -4   -1.73    3.18
   8  11  -4   -1.10    6.14
   8  11   4    0.93    6.88
   8 -11   4    9.73    3.56
   9 -11   4   11.43    3.81
   9  11   4   13.54    7.38
   9 -11  -4    9.70    3.80
   9  11   4    8.43    3.99
   9  11  -4    6.75    4.06
   9  11  -4   19.74    6.99
  10 -11  -4   62.00    5.29
  10 -11   4   57.16    5.39
  10  11  -4   55.68    5.60
  10  11   4   47.93    8.86
  11 -11  -4   -1.45    4.05
  11  11  -4    2.02    4.57
  11 -11   4    0.89    4.01
   0  12  -4  999.01   22.14
   0  12   4  965.91   22.27
   0 -12   4  959.97   17.35
   0 -12  -4  954.00   17.90
  -1  12   4   64.12    6.46
  -1 -12  -4   66.93    3.92
   1 -12  -4   64.11    4.11
   1  12   4   67.43    7.08
   1  12  -4   73.32    6.97
  -1  12  -4   69.95    6.41
   2 -12  -4    7.75    2.89
   2  12  -4    9.19    5.11
  -2  12  -4    6.74    4.45
   2  12   4    4.68    5.53
  -2 -12  -4    7.82    2.34
  -2  12   4    9.02    4.48
   3  12   4  690.02   18.89
   3  12  -4  676.26   18.41
  -3  12  -4  680.52   16.44
   3  12  -4  666.22   13.48
   3  12   4  676.26   12.83
  -3  12   4  669.23   16.40
   4  12  -4   48.22    7.01
   4  12   4   55.11    7.59
   4  12   4   62.88    3.83
  -4  12   4   74.08    5.85
   4 -12  -4   52.43    3.86
   4  12  -4   55.37    4.16
   4 -12   4   66.37    5.42
   5  12   4  793.32   15.22
   5 -12  -4  816.97   15.73
   5  12  -4  786.55   15.96
   5 -12   4  817.41   17.30
  -5  12   4  809.09   17.50
   5  12  -4  777.15   20.85
   6 -12   4   27.92    4.05
   6  12  -4   25.10    3.73
   6  12   4   29.30    7.21
   6 -12   4   25.86    3.40
   6  12   4   22.55    3.34
   6 -12  -4   27.21    3.73
   6  12  -4   22.81    6.87
   7  12   4  297.62    8.18
   7 -12  -4  300.30    8.65
   7 -12   4  291.45    8.85
   7  12  -4  311.16   13.41
   7  12   4  301.04   14.06
   7  12  -4  299.13    8.97
   8 -12  -4    1.34    3.33
   8 -12   4    0.32    3.27
   8  12   4    6.43    7.19
   8  12  -4    0.85    3.93
   8  12  -4    0.68    6.37
   9  12   4   23.41    7.98
   9  12  -4   17.13    7.34
   9  12  -4   20.09    4.48
   9 -12  -4   23.51    4.21
   9 -12   4   13.81    4.07
  10 -12  -4  104.06    6.39
  10  12  -4  106.30    6.84
  10 -12   4  109.01    6.30
  10  12   4   93.45   10.39
  11 -12   4  132.29    7.54
  11  12  -4  152.26    8.35
  11 -12  -4  151.16    7.60
   0  13  -4   -2.94    4.82
   0  13   4    0.06    5.06
   0 -13  -4   -1.18    2.41
   1  13  -4   47.81    6.72
  -1 -13  -4   60.19    3.96
   1 -13  -4   57.09    4.12
  -1  13  -4   52.28    6.32
  -1  13   4   57.21    6.55
   1  13   4   51.76    7.03
   2 -13  -4  121.58    5.65
   2  13  -4  119.81    9.09
   2  13   4  121.40    9.07
  -2  13   4  110.21    8.16
  -2  13  -4  106.93    7.90
  -3  13   4  142.35    8.38
  -3  13  -4  121.71    8.06
   3  13  -4  131.84    5.41
   3  13   4  152.60   10.50
   3  13  -4  127.78    9.57
   4  13   4  645.33   12.70
   4  13   4  630.18   18.99
   4  13  -4  606.46   18.23
  -4  13   4  651.63   15.94
   4  13  -4  618.26   13.32
  -5  13   4  580.11   14.31
   5  13  -4  534.10   17.26
   5  13  -4  533.50   12.22
   5 -13   4  566.70   13.86
   5  13   4  539.54   17.91
   5 -13  -4  560.65   12.10
   6  13   4   28.74    7.60
   6  13  -4   45.62    4.47
   6  13  -4   30.52    7.20
   6 -13  -4   40.56    3.92
   6 -13   4   35.62    4.18
   7 -13   4  336.91    9.61
   7  13  -4  335.16   14.25
   7  13  -4  326.66    9.38
   7 -13  -4  326.81    9.24
   7  13   4  316.50   14.75
   8  13  -4   70.48    8.83
   8  13   4   90.88   10.00
   8  13  -4   81.08    5.71
   8 -13  -4   72.84    5.37
   8 -13   4   78.36    5.55
   9  13   4   58.39    9.44
   9  13  -4   57.14    5.48
   9  13  -4   53.34    8.66
   9 -13   4   53.91    5.21
   9 -13  -4   58.77    5.02
  10 -13   4  288.84   10.03
  10 -13  -4  298.50    9.81
  10  13   4  304.03   15.57
  10  13  -4  306.71   10.52
   0 -14  -4  251.04    7.16
   0  14  -4  237.44   11.25
   0  14   4  232.88   11.36
   1  14  -4  441.81   14.73
  -1  14  -4  400.60   13.60
   1 -14  -4  403.71    9.96
   1  14   4  424.75   14.87
  -1  14   4  393.97   13.73
   2  14   4  189.53   11.25
  -2  14   4  188.62    9.93
   2  14  -4  187.93   10.62
   2 -14  -4  199.41    6.83
  -2  14  -4  194.90    9.98
  -3  14  -4  133.15    8.55
  -3  14   4  129.48    8.66
   3  14  -4  119.57    9.15
   3  14   4  114.01    9.52
   3 -14  -4  129.58    6.11
   4  14  -4  108.11    5.59
   4  14   4  103.43    9.47
  -4  14   4  104.10    7.85
   4  14  -4  108.08    9.13
   5  14  -4  211.60   12.01
   5  14  -4  222.35    7.57
   5 -14  -4  222.60    7.08
   5  14   4  233.91   12.83
   5 -14   4  209.77    8.81
   6  14   4  399.19   16.22
   6  14  -4  421.96   10.65
   6  14  -4  400.62   15.57
   6 -14  -4  404.39   10.38
   6 -14   4  413.11   10.65
   7  14  -4  177.70    7.40
   7 -14  -4  175.81    6.88
   7  14  -4  160.90   11.40
   7  14   4  170.23   12.27
   7 -14   4  168.88    7.05
   8 -14  -4   87.33    5.68
   8 -14   4   74.78    5.60
   8  14  -4   83.27    9.64
   8  14  -4   91.54    6.03
   8  14   4   82.22   10.23
   9 -14   4  112.87    6.63
   9  14  -4  117.90   10.61
   9  14  -4  107.76    6.78
   9 -14  -4  102.16    6.22
   9  14   4  135.81   11.69
  10  14   4   90.56   10.96
  10 -14  -4   78.99    6.01
  10 -14   4   83.91    6.28
   0  15   4    4.63    5.69
   0  15  -4    1.68    5.37
  -1  15   4  161.95    9.87
  -1  15  -4  176.33   10.24
   1  15  -4  157.99   10.40
   1  15   4  159.31   10.71
   1 -15  -4  177.77    6.58
  -2  15  -4   73.97    7.11
  -2  15   4   60.30    7.19
   2 -15  -4   68.61    4.88
   2  15  -4   53.81    7.78
   2  15   4   67.77    8.33
  -3  15   4   52.64    6.67
   3 -15  -4   73.61    5.24
  -3  15  -4   59.26    6.72
   3  15   4   70.26    8.67
   3  15  -4   68.67    8.17
   4  15   4    1.29    6.61
   4  15  -4   -3.48    6.06
   4  15  -4    5.53    3.60
  -4  15   4    2.69    4.85
   5 -15  -4   -3.72    3.09
   5  15  -4   -9.51    6.19
   5 -15   4    1.89    4.22
   5  15  -4   -1.16    3.62
   5  15   4   -4.57    6.65
   6 -15   4   10.82    3.72
   6  15  -4   -0.28    6.77
   6  15  -4    4.64    3.98
   6  15   4    7.66    7.61
   6 -15  -4    3.50    3.15
   7 -15   4  247.37    8.55
   7  15  -4  254.77   13.50
   7  15   4  250.92   14.33
   7  15  -4  242.67    8.72
   7 -15  -4  257.44    8.30
   8 -15   4   82.16    5.89
   8 -15  -4   70.61    5.35
   8  15   4   70.11   10.14
   8  15  -4   76.01    9.61
   9  15  -4    5.54    7.36
   9  15   4    7.77    8.21
   9 -15   4    5.87    3.91
   9 -15  -4   -3.95    3.55
   0  16   4  213.72   11.53
   0  16  -4  223.96   11.65
  -1  16  -4   35.88    6.80
   1  16  -4   33.49    7.16
  -1  16   4   46.41    7.14
   1  16   4   42.97    7.59
   2 -16  -4  359.14    9.83
  -2  16   4  338.32   13.40
  -2  16  -4  346.62   13.23
   2  16   4  334.01   14.54
   2  16  -4  332.29   14.12
   3 -16  -4  110.72    6.09
   3  16   4  107.65    9.95
  -3  16   4  120.35    8.56
   3  16  -4  114.50    9.60
  -3  16  -4  127.49    9.15
   4  16   4   27.04    7.77
   4 -16  -4   28.42    4.48
   4  16  -4   13.69    6.86
  -4  16   4   24.69    5.88
   5  16   4   76.84    9.68
   5 -16  -4   68.86    5.06
   5 -16   4   71.71    6.39
   5  16  -4   66.44    8.88
   6 -16   4   17.99    4.20
   6 -16  -4   19.90    3.91
   6  16   4    6.61    7.85
   6  16  -4   18.28    7.69
   7 -16   4    9.60    3.81
   7 -16  -4   13.04    3.92
   7  16   4   12.38    8.18
   7  16  -4    7.78    7.28
   8 -16   4   14.92    4.28
   8  16   4   18.53    8.70
   8 -16  -4   15.69    4.04
   8  16  -4   14.98    7.93
   9 -16   4   -1.35    4.10
   9 -16  -4   -3.57    3.85
   9  16  -4    7.57    8.02
   9  16   4   13.52    8.91
   0  17   4   -4.28    5.81
   0  17  -4    5.59    6.02
  -1  17   4   29.60    6.91
  -1  17  -4   26.54    6.65
   1  17   4   28.73    7.37
   1  17  -4   22.93    7.17
  -2  17   4   -0.40    5.77
   2  17  -4   12.02    6.70
  -2  17  -4    1.38    5.69
   2  17   4    2.92    6.50
   3  17   4   -3.04    6.67
  -3  17  -4    7.40    5.74
   3  17  -4   -0.23    6.48
  -3  17   4   -2.53    5.45
   4  17   4    1.23    6.91
   4  17  -4    0.59    6.47
   4 -17  -4   -1.50    3.84
  -4  17   4   -4.71    5.26
   5  17   4   23.72    8.20
   5  17  -4   12.86    7.36
   5 -17   4   22.62    5.35
   6  17  -4   10.58    7.46
   6 -17   4   14.97    3.95
   6  17   4   13.78    8.28
   7  17  -4    4.85    7.52
   7 -17   4    1.27    3.71
   7  17   4   -0.39    7.92
   8  17  -4   -4.68    7.34
   8  17   4   16.08    8.67
   8 -17   4   -6.02    3.75
   0  18  -4   71.83    8.52
   0  18   4   74.66    8.89
  -1  18   4  494.69   17.41
   1  18  -4  516.10   17.78
  -1  18  -4  516.34   17.17
  -2  18   4   -2.42    6.08
   2  18   4    0.15    6.79
   2  18  -4    5.14    6.90
  -2  18  -4    2.93    6.03
   3  18  -4    0.44    6.57
   3  18   4   -2.69    7.09
  -3  18   4   -2.14    5.74
  -3  18  -4    9.52    5.99
   4  18   4   50.39    9.01
  -4  18   4   43.30    7.13
   4  18  -4   32.17    8.08
   5  18  -4  319.62   15.37
   5 -18  -4  324.14   10.90
   5  18   4  346.08   16.37
   6  18  -4    3.81    7.44
   6  18   4   11.82    8.14
   6 -18   4    7.07    3.99
   7  18  -4   81.81   10.29
   7 -18   4   70.10    5.62
   7  18   4   71.35   10.70
   0  19   4   -5.31    6.50
   0  19  -4   -4.95    6.34
   1  19  -4   39.81    8.07
  -1  19   4   52.52    8.45
   1  19   4   61.17    8.98
  -1  19  -4   61.54    8.44
  -2  19  -4  115.03    9.63
  -2  19   4  114.83    9.80
   2  19   4  110.27   10.65
   2  19  -4  111.65   10.28
   3  19   4   54.83    9.31
   3  19  -4   43.83    8.51
  -3  19   4   61.95    8.36
  -3  19  -4   62.50    8.11
   4  19  -4   -1.54    6.95
   4 -19   4   12.29    5.79
   4  19   4   -0.92    7.38
   5  19  -4  160.55   12.20
   5  19   4  149.12   12.51
   6 -19   4    3.95    3.84
   6  19  -4   11.93    7.97
   6  19   4   10.09    8.55
   0  20   4    3.31    7.08
   0  20  -4   -9.53    6.32
  -1  20  -4   58.72    8.44
   1  20   4   50.51    8.96
  -1  20   4   39.20    8.53
   1  20  -4   50.44    8.60
  -2  20  -4   44.94    7.99
   2  20   4   42.80    8.87
  -2  20   4   39.99    8.11
   2  20  -4   36.25    8.36
  -3  20   4   24.32    7.50
   3  20  -4   35.91    8.22
  -3  20  -4   35.09    7.63
   3  20   4   23.58    8.50
   4  20  -4   -3.52    7.00
   4 -20   4   -3.38    5.61
   4  20   4   12.65    7.95
   5  20   4    8.33    8.34
   5  20  -4   10.95    8.14
   0  21   4   -4.61    7.27
   0  21  -4    2.44    6.99
  -1  21  -4    0.88    6.85
   1  21   4    8.39    7.77
   1  21  -4    6.94    7.33
  -1  21   4   -9.74    6.73
  -2  21  -4    3.95    6.94
   2  21   4    1.91    7.68
   2  21  -4    2.66    7.15
  -2  21   4   -3.46    7.12
   3  21   4   15.87    8.25
   3  21  -4   25.40    8.09
  -3  21   4   22.57    7.68
   0   0   5   -6.28    1.15
   0   0  -5   -6.93    0.75
   0   0  -5   -5.89    0.84
   1   0  -5   -0.01    1.03
   1   0   5   -0.62    1.58
   1   0  -5   -2.53    1.09
  -1   0   5   -0.36    0.96
   2   0  -5   -0.27    1.55
   2   0   5   -3.54    2.18
   2   0   5    0.17    1.38
   3   0  -5    2.94    1.86
   3   0   5   -0.50    1.43
   3   0   5    1.04    2.63
   3   0  -5   -0.36    1.67
   4   0   5   -2.25    1.80
   4   0  -5    0.58    1.97
   4   0   5    2.40    2.74
   4   0  -5   -1.18    1.71
   5   0   5   -5.35    2.83
   5   0  -5    1.42    2.18
   5   0  -5    1.57    1.92
   5   0   5    1.85    1.98
   6   0  -5   -2.71    2.37
   6   0   5    1.46    1.96
   6   0  -5   -1.56    2.37
   6   0   5   -0.68    3.14
   7   0  -5    0.36    2.29
   7   0   5   -0.54    2.19
   7   0   5   -2.25    3.43
   8   0  -5    0.55    2.60
   8   0   5   -0.01    2.87
   8   0   5    3.17    4.04
   9   0  -5   -1.17    3.23
   9   0   5   -2.95    3.14
  10   0   5    1.53    3.39
  10   0  -5   -0.29    3.18
  11   0   5    0.14    3.60
  11   0  -5   -1.34    3.29
  12   0  -5    1.19    4.03
  12   0   5    0.39    4.07
  13   0   5   -2.75    4.32
  13   0  -5    5.93    4.58
   0   1   5   -6.16    1.59
   0   1  -5   -6.24    1.01
   0  -1   5   -4.67    1.19
   0  -1  -5   -6.17    1.01
  -1   1   5   82.80    2.91
   1  -1  -5   86.95    2.35
   1  -1   5   89.23    2.97
   1   1  -5   85.21    2.24
   1   1  -5   85.46    2.63
   1  -1  -5   84.99    2.71
   1   1   5   86.39    4.03
   1   1   5   84.79    2.07
   2   1   5    0.12    1.26
   2  -1  -5   -0.49    1.50
   2   1   5   -0.44    2.60
   2   1  -5    0.01    2.02
   2  -1   5   -2.01    1.88
   2   1  -5   -0.67    1.40
   3  -1   5  186.78    5.58
   3   1   5  190.36    6.76
   3  -1  -5  190.33    4.83
   3   1  -5  197.46    5.52
   3   1  -5  191.88    4.87
   3  -1   5  187.56    4.80
   3   1   5  199.11    4.59
   4   1   5   65.73    4.38
   4  -1   5   56.72    3.29
   4   1  -5   57.90    4.33
   4   1   5   56.39    3.19
   4   1  -5   58.42    3.44
   4  -1   5   62.64    4.35
   4  -1  -5   63.43    3.43
   5   1  -5   75.72    3.90
   5   1   5   65.62    3.59
   5   1  -5   74.45    4.83
   5  -1  -5   75.28    3.57
   5  -1   5   74.37    3.75
   5  -1   5   78.92    5.02
   5   1   5   81.25    5.84
   6  -1  -5  110.35    4.06
   6  -1  -5  112.49    4.45
   6   1  -5  115.81    5.57
   6  -1   5  122.36    5.82
   6  -1   5  105.62    4.56
   6   1  -5  106.66    4.67
   6   1   5  110.76    6.45
   6   1   5  118.67    4.61
   7   1   5    5.63    2.62
   7   1  -5    4.95    3.09
   7   1   5   14.01    4.02
   7  -1   5    7.80    3.55
   7   1  -5    6.78    2.86
   7  -1   5    7.20    2.76
   7  -1  -5    6.75    2.80
   8  -1   5    7.93    3.02
   8   1   5    5.67    4.32
   8   1  -5    4.76    3.13
   8  -1  -5    6.21    3.12
   8   1   5    4.99    2.96
   8  -1   5    2.41    3.89
   9   1  -5    4.57    3.42
   9   1   5    2.26    2.81
   9  -1   5    2.48    3.18
   9  -1  -5    3.35    3.38
  10   1   5    3.48    3.46
  10  -1   5    5.16    3.19
  10   1  -5    2.61    3.63
  10  -1  -5    2.06    3.57
  11   1  -5   95.81    5.81
  11  -1   5   95.25    6.02
  11   1   5  109.14    6.16
  11  -1  -5   96.32    6.09
  12   1   5    7.48    4.21
  12  -1  -5   -0.06    4.12
  12  -1   5    8.95    4.25
  12   1  -5    4.79    4.22
  13  -1   5   13.31    4.69
  13   1  -5   11.83    4.82
  13  -1  -5    2.13    4.41
  13   1   5   10.48    4.48
   0   2   5  209.40    5.88
   0  -2  -5  216.07    4.52
  -1   2   5 1749.79   29.19
   1   2  -5 1749.16   29.29
  -1  -2  -5 1801.61   29.37
   1   2  -5 1750.37   28.25
   1   2   5 1801.31   28.62
   1  -2   5 1815.53   28.93
   1  -2  -5 1831.41   28.15
   2   2   5  973.88   15.78
   2  -2   5  986.81   16.54
   2  -2  -5 1012.97   16.05
   2   2  -5  964.33   17.24
   2   2  -5  945.41   16.15
   2   2   5  972.37   18.03
   3  -2   5    8.21    1.95
   3   2  -5   12.84    2.98
   3   2   5    9.88    1.69
   3   2  -5    8.79    2.02
   3   2   5    9.59    3.51
   3  -2   5   11.06    2.09
   4   2  -5  175.75    6.31
   4   2  -5  174.41    5.03
   4  -2  -5  180.13    4.82
   4  -2   5  171.77    4.99
   4   2   5  174.85    4.69
   4   2   5  190.42    7.29
   4  -2   5  183.42    5.32
   5  -2   5  819.13   15.02
   5   2  -5  816.30   14.96
   5   2  -5  846.47   16.04
   5   2   5  814.59   17.14
   5   2   5  832.45   14.82
   5  -2   5  854.94   15.52
   5  -2  -5  819.67   15.02
   6   2  -5   10.76    2.68
   6   2   5    7.70    2.43
   6   2  -5   11.08    3.33
   6  -2   5    7.85    2.47
   6   2   5    3.24    3.87
   6  -2  -5   12.79    2.40
   6  -2   5   10.20    2.97
   7   2  -5  601.41   12.36
   7   2   5  593.07   11.97
   7  -2   5  582.12   12.23
   7  -2  -5  571.53   12.23
   7   2  -5  577.83   13.10
   7  -2   5  610.77   13.04
   7   2   5  597.76   14.56
   8   2   5  162.10    5.97
   8  -2  -5  157.40    6.22
   8  -2   5  159.03    6.21
   8   2  -5  150.46    6.13
   8   2   5  171.25    8.54
   9   2   5  327.08    8.98
   9   2  -5  333.80    9.31
   9  -2  -5  330.89    9.04
   9  -2   5  342.10    9.06
  10  -2  -5  107.17    5.96
  10   2  -5   96.55    5.89
  10   2   5  102.52    5.79
  10  -2   5  104.45    5.89
  11  -2   5  209.59    8.00
  11  -2  -5  198.75    7.95
  11   2  -5  183.58    7.79
  11   2   5  203.70    7.75
  12  -2   5  115.00    6.76
  12   2   5  108.74    6.55
  12  -2  -5  119.30    6.86
  12   2  -5  107.83    6.79
  13  -2  -5    8.20    4.58
  13   2   5   16.76    4.80
  13   2  -5   13.45    4.79
  13  -2   5   10.62    4.52
   0   3  -5    1.33    2.32
   0  -3  -5   -2.34    1.49
   0   3   5   -1.87    2.82
   1  -3  -5 1143.02   17.83
   1   3  -5 1136.01   19.66
   1   3   5 1109.75   20.18
  -1  -3  -5 1111.14   18.79
   1   3  -5 1107.58   18.22
   1   3   5 1088.40   17.84
   1  -3   5 1107.45   19.02
  -1   3   5 1117.27   19.33
   2   3  -5   89.55    5.45
  -2   3   5   83.80    4.03
   2  -3  -5   97.43    3.23
   2  -3   5   94.62    3.83
   2   3  -5   81.21    3.10
   2   3   5   82.92    4.95
   2   3   5   90.59    2.70
   3  -3   5   16.55    2.10
   3   3  -5    8.94    3.26
   3   3   5   14.58    1.79
   3   3   5   16.75    3.89
   3  -3  -5    9.71    1.87
   3   3  -5   11.63    1.86
   4  -3  -5   84.83    3.74
   4  -3   5   89.32    3.89
   4   3  -5   82.39    3.80
   4   3  -5   89.82    5.76
   4   3   5   82.90    3.33
   4   3   5   84.99    5.54
   4  -3   5   89.85    3.93
   5  -3   5  421.75    9.05
   5  -3   5  443.23    9.13
   5   3   5  411.28    8.62
   5  -3  -5  429.99    9.01
   5   3   5  422.28   11.57
   5   3  -5  418.12    9.08
   5   3  -5  422.33   10.59
   6   3   5    6.71    2.41
   6   3  -5    6.75    2.61
   6   3   5   11.37    4.29
   6  -3  -5    6.12    2.54
   6  -3   5   11.67    2.68
   6  -3   5    9.04    2.52
   6   3  -5    3.56    3.51
   7  -3   5  409.49    9.43
   7   3   5  405.91    9.26
   7   3   5  414.28   12.15
   7   3  -5  406.66    9.63
   7  -3   5  428.98   10.10
   7   3  -5  379.67   10.79
   7  -3  -5  400.40    9.52
   8   3  -5  748.63   15.46
   8  -3  -5  773.68   15.51
   8   3   5  763.09   18.08
   8   3   5  765.87   15.21
   8  -3   5  777.23   15.49
   9  -3   5    8.39    3.46
   9  -3  -5    4.97    3.01
   9   3   5    6.67    5.16
   9   3   5   11.24    3.29
   9   3  -5    7.19    3.18
  10   3  -5  232.41    7.93
  10   3   5  236.00    7.83
  10  -3   5  249.02    8.20
  10  -3  -5  226.71    8.01
  11   3  -5   82.16    6.00
  11  -3   5   80.09    5.49
  11  -3  -5   84.32    5.96
  11   3   5   91.10    5.91
  12   3  -5  120.51    7.06
  12  -3  -5  114.39    6.93
  12   3   5  116.66    6.77
  12  -3   5  116.57    6.87
  13   3  -5    1.75    4.55
  13   3   5   -7.84    4.13
  13  -3  -5   -1.78    4.28
  13  -3   5   -2.01    4.30
   0  -4  -5 3671.93   58.39
   0   4  -5 3581.71   58.14
   0   4   5 3570.21   58.53
  -1   4   5    1.17    2.97
   1   4   5   -0.09    1.06
  -1  -4  -5    0.12    1.65
   1   4  -5   -2.84    3.06
   1   4  -5   -0.53    1.73
   1   4   5   -3.00    3.48
  -2   4   5    2.10    2.52
   2   4   5    2.31    1.30
   2  -4   5    1.44    2.16
   2   4  -5    1.75    3.30
   2   4   5    2.42    3.65
   2   4  -5   -1.78    1.74
   2  -4  -5    1.80    1.46
   3   4  -5   46.00    4.35
   3   4   5   45.75    2.58
  -3   4   5   46.78    2.62
   3  -4   5   48.50    2.84
   3  -4  -5   43.82    2.89
   3   4  -5   53.15    3.21
   3   4   5   47.17    4.87
   4   4   5   89.04    3.32
   4   4  -5   79.30    3.85
   4  -4  -5   91.20    2.79
   4   4   5   90.64    6.90
   4  -4   5   87.80    3.79
   4   4  -5   85.91    6.26
   4  -4  -5   91.21    3.76
   4  -4   5   87.95    3.67
   5   4  -5    8.90    3.68
   5   4   5    4.98    4.12
   5  -4   5    5.63    2.07
   5  -4  -5   11.01    2.35
   5   4  -5   12.10    2.23
   5   4   5   11.98    2.14
   5  -4   5   12.16    2.42
   6  -4   5    4.22    2.20
   6   4  -5    5.53    2.65
   6  -4   5    4.93    2.40
   6  -4  -5    7.29    2.55
   6   4   5    4.76    2.30
   6   4   5    7.45    4.44
   6   4  -5    3.17    3.75
   7  -4   5   78.96    4.66
   7   4  -5   73.91    5.68
   7   4  -5   79.98    4.79
   7   4   5   79.19    4.30
   7  -4   5   75.49    5.08
   7  -4  -5   79.38    4.62
   7   4   5   88.80    6.67
   8  -4   5   37.06    3.90
   8   4   5   41.47    6.05
   8   4  -5   40.87    4.01
   8  -4  -5   35.57    3.83
   8   4   5   44.10    3.78
   9   4   5   35.06    4.04
   9   4  -5   33.92    4.32
   9   4   5   43.43    6.40
   9  -4   5   26.85    3.62
   9  -4  -5   35.69    4.11
  10  -4   5    3.74    3.50
  10   4  -5    7.97    3.82
  10  -4  -5    0.81    3.41
  10   4   5    7.37    3.56
  11  -4  -5   60.71    5.34
  11   4  -5   75.40    5.71
  11   4   5   75.56    5.73
  11  -4   5   59.24    5.00
  12  -4  -5  124.80    7.00
  12   4   5  122.63    6.90
  12   4  -5  123.81    7.15
  12  -4   5  121.93    6.67
  13  -4   5   91.58    6.77
  13  -4  -5   75.80    6.44
  13   4  -5   88.91    6.76
  13   4   5   97.64    6.84
   0   5  -5   -3.76    3.02
   0   5   5   -7.81    3.38
   0  -5  -5   -5.82    1.70
   1   5  -5 1333.35   21.72
   1   5   5 1314.70   24.44
   1   5   5 1321.56   20.99
  -1  -5  -5 1346.19   22.31
  -1   5   5 1299.17   23.60
   1  -5  -5 1338.24   22.62
  -1   5  -5 1292.23   23.28
   2   5   5  177.29    8.12
   2  -5  -5  191.84    4.48
  -2   5   5  196.57    6.55
   2   5  -5  191.51    7.67
   2  -5   5  194.67    6.08
   2   5   5  189.52    4.12
   2   5  -5  188.15    4.96
   3   5   5   30.97    2.33
   3   5   5   26.55    4.68
   3   5  -5   29.08    4.24
   3   5  -5   32.23    2.34
  -3   5   5   38.12    2.94
   3  -5   5   29.79    2.70
   3  -5  -5   38.48    2.49
   4  -5  -5  227.09    5.78
   4  -5   5  234.35    6.00
   4   5   5  227.80    5.37
   4   5  -5  224.69    5.97
   4   5  -5  232.04    8.56
   4   5   5  238.38    9.37
   5  -5  -5    7.61    1.41
   5  -5   5    9.79    2.17
   5   5   5   10.72    2.26
   5   5   5    5.31    4.44
   5   5  -5   11.87    4.05
   5  -5   5    6.95    2.13
   5  -5  -5    9.14    2.36
   5   5  -5    3.92    2.42
   6   5   5   59.98    3.70
   6   5  -5   62.60    4.09
   6  -5  -5   61.97    4.02
   6   5  -5   60.68    5.55
   6   5   5   59.55    6.21
   6  -5   5   64.14    4.16
   6  -5   5   62.51    4.03
   7   5   5   11.53    5.08
   7   5  -5    8.32    3.03
   7  -5   5    9.63    2.86
   7  -5   5    7.53    2.86
   7  -5  -5    5.65    2.85
   7   5  -5   -1.96    4.13
   8   5  -5  107.53    5.57
   8   5  -5   98.84    7.67
   8   5   5  102.67    5.12
   8  -5   5  112.96    5.17
   8  -5  -5  105.52    5.49
   8   5   5  114.50    8.75
   9  -5  -5  158.43    6.55
   9   5  -5  142.67    6.52
   9   5   5  158.18    6.34
   9   5   5  151.13    9.78
   9  -5   5  156.35    6.57
  10  -5  -5   61.65    5.03
  10   5   5   59.02    4.80
  10   5  -5   59.94    5.12
  10  -5   5   62.37    5.03
  11   5  -5  144.51    7.15
  11   5   5  143.09    6.86
  11  -5  -5  138.11    6.98
  11  -5   5  130.49    6.86
  12   5   5    6.93    4.56
  12  -5   5   10.35    4.48
  12   5  -5   14.31    4.59
  12  -5  -5    8.21    4.49
  13   5  -5   39.86    5.85
  13   5   5   35.78    5.47
  13  -5   5   29.00    5.34
  13  -5  -5   35.94    5.46
   0   6   5   93.95    6.92
   0   6  -5  114.72    6.24
   0  -6  -5  100.26    3.74
  -1  -6  -5    6.63    1.79
  -1   6   5    8.63    3.51
  -1  -6   5    4.31    0.97
  -1   6  -5    8.50    3.17
   1  -6  -5    6.72    2.16
   1   6   5    1.12    3.93
   1   6  -5    5.04    1.96
   1   6  -5   -1.48    3.45
   2   6   5   42.76    5.07
   2   6   5   45.08    2.40
   2   6  -5   44.65    3.13
  -2  -6  -5   43.89    2.97
   2   6  -5   50.21    4.87
  -2   6   5   57.29    4.12
   3   6  -5  350.50   10.63
   3   6  -5  347.08    7.61
   3   6   5  364.42   11.34
   3  -6  -5  364.28    7.37
  -3   6   5  342.65    8.57
   3  -6   5  344.13    8.34
   3   6   5  359.66    7.01
   4  -6  -5  258.79    6.25
   4   6   5  248.07   10.00
   4   6  -5  249.53    9.20
   4   6  -5  251.26    6.38
   4  -6   5  250.42    6.58
  -4   6   5  254.99    6.49
   4   6   5  249.83    5.81
   5  -6   5   -1.08    1.98
   5   6  -5    0.53    2.34
   5   6  -5   -1.68    4.08
   5   6   5   -1.78    2.00
   5  -6   5   -0.91    2.03
   5   6   5    5.25    4.58
   5  -6  -5    2.23    1.64
   5  -6  -5    0.40    2.09
   6  -6   5  146.23    5.52
   6   6   5  143.34    8.92
   6   6  -5  139.12    5.13
   6   6   5  141.19    5.08
   6  -6  -5  140.09    5.25
   6   6  -5  157.65    8.38
   6  -6   5  139.95    5.08
   7  -6  -5   83.67    4.75
   7   6   5   85.68    7.41
   7   6  -5   85.00    6.57
   7  -6   5   91.06    4.62
   7   6   5   83.31    4.72
   7   6  -5   81.27    4.89
   7  -6   5   88.10    4.95
   8  -6   5  308.51    8.76
   8   6  -5  293.24   11.12
   8  -6  -5  311.22    8.61
   8   6   5  311.46    8.29
   8   6   5  306.16   12.30
   8   6  -5  316.38    8.78
   9  -6  -5  223.80    7.80
   9  -6   5  241.29    7.95
   9   6   5  245.96   11.60
   9   6   5  233.20    7.56
   9   6  -5  228.69    7.91
  10  -6  -5    3.04    3.20
  10   6   5    4.08    3.87
  10  -6   5    3.81    3.13
  10   6  -5    7.08    3.97
  11   6  -5  377.04   11.15
  11  -6  -5  387.30   11.08
  11  -6   5  388.17   11.13
  11   6   5  385.92   10.91
  12  -6   5   73.62    6.04
  12  -6  -5   63.83    5.84
  12   6   5   77.28    6.27
  12   6  -5   73.98    6.28
  13   6   5  185.40    8.57
  13  -6   5  192.27    8.79
  13  -6  -5  184.57    8.64
  13   6  -5  205.41    9.10
   0   7   5   -4.26    3.65
   0  -7  -5   -3.90    1.87
   0   7  -5   -0.97    3.39
  -1   7  -5  200.14    7.63
   1   7  -5  193.21    7.97
  -1  -7  -5  202.16    5.02
  -1   7   5  192.08    7.84
   1  -7  -5  195.18    5.49
   1   7   5  190.36    8.70
  -1  -7   5  198.66    4.02
   1   7  -5  195.73    5.21
  -2   7  -5  406.97   10.18
   2   7  -5  398.98    8.37
   2   7   5  412.44    7.61
  -2  -7  -5  402.33    8.18
  -2   7   5  397.44   10.28
   2   7   5  393.78   11.87
  -3   7   5  145.65    6.13
   3  -7   5  138.08    5.68
   3   7   5  139.03    3.90
   3   7   5  127.08    8.28
   3   7  -5  134.51    7.82
   3  -7  -5  138.09    4.29
   3   7  -5  142.39    4.67
  -4   7   5  451.41    9.90
   4   7   5  441.55   13.17
   4   7   5  448.84    8.77
   4   7  -5  441.22    9.44
   4  -7   5  445.53    9.87
   4   7  -5  432.59   12.60
   4  -7  -5  443.87    9.17
   5   7   5    6.57    2.24
   5   7  -5    4.93    4.52
   5   7   5   -2.53    4.60
   5  -7   5    0.83    2.38
   5   7  -5    7.20    2.50
   5  -7  -5    2.76    2.26
   5  -7   5    5.43    2.33
   5  -7  -5    4.17    2.11
   6   7   5   45.34    3.18
   6   7   5   43.94    6.28
   6  -7   5   42.57    3.62
   6   7  -5   44.15    3.37
   6   7  -5   49.04    5.92
   6  -7   5   45.83    3.32
   6  -7  -5   51.07    3.55
   7  -7   5    0.44    2.54
   7   7  -5    9.91    5.01
   7   7   5    8.51    3.00
   7   7   5    8.97    5.62
   7  -7  -5    3.59    2.79
   7   7  -5    6.50    3.11
   7  -7   5    6.22    2.65
   8  -7  -5  274.05    8.14
   8   7   5  276.97    7.75
   8   7  -5  273.44    8.29
   8   7  -5  241.72   10.82
   8   7   5  267.65   11.94
   8  -7   5  268.88    8.00
   9   7   5   12.92    6.29
   9  -7   5   -3.43    3.22
   9   7   5   12.68    3.49
   9   7  -5    8.61    3.76
   9  -7  -5    4.19    3.33
  10   7   5   93.63    5.69
  10  -7  -5   82.68    5.72
  10   7  -5   87.37    6.03
  10  -7   5   95.90    5.89
  11   7   5   89.59    6.44
  11  -7   5   95.94    6.35
  11  -7  -5   90.60    5.89
  11   7  -5  107.92    6.80
  12  -7  -5   -1.83    4.11
  12  -7   5    2.86    4.27
  12   7   5    6.63    4.44
  12   7  -5    2.26    4.55
   0   8  -5 1534.18   28.48
   0  -8  -5 1536.27   26.13
   0   8   5 1508.17   28.83
  -1   8   5   21.76    4.37
  -1  -8  -5   19.23    2.28
   1   8  -5   23.21    4.51
  -1  -8   5   24.50    1.57
  -1   8  -5   31.14    4.23
   1  -8  -5   20.34    2.54
   1   8   5   13.50    4.66
   2   8  -5   -2.65    3.92
   2   8   5    3.51    1.65
  -2   8   5   -0.84    3.32
  -2  -8  -5    3.60    1.81
   2   8   5    0.43    4.27
  -2   8  -5    1.71    3.13
   2   8  -5    0.82    2.10
   3   8  -5  380.08   11.93
   3   8  -5  377.51    8.40
  -3   8   5  396.67   10.10
   3  -8   5  369.36    9.68
   3   8   5  354.62   12.17
   3   8   5  385.66    7.69
   3  -8  -5  394.32    8.12
  -4   8   5    1.81    2.84
   4   8   5    0.36    4.72
   4  -8  -5    4.32    2.27
   4  -8   5    1.20    2.55
   4   8  -5    8.43    4.56
   4   8   5    8.82    2.02
   4   8  -5    4.97    2.34
   5   8  -5   18.53    2.89
   5   8   5    6.58    5.26
   5  -8  -5   16.21    2.71
   5  -8  -5   19.41    2.71
   5   8  -5   18.96    5.15
   5   8   5   17.46    2.51
   5  -8   5   16.61    2.81
   6  -8  -5   91.51    4.61
   6  -8   5   85.76    4.83
   6   8  -5   82.80    4.66
   6  -8   5   94.02    4.60
   6   8   5   86.63    4.32
   6   8   5  103.83    8.01
   6   8  -5   97.85    7.42
   7   8   5    2.80    2.70
   7  -8  -5    1.98    2.84
   7  -8   5   12.01    3.19
   7   8  -5    2.52    5.19
   7   8   5    6.57    5.76
   7   8  -5    4.61    3.16
   8   8   5    3.73    6.10
   8   8  -5    6.04    5.52
   8   8  -5    1.70    3.36
   8   8   5    8.44    3.34
   8  -8  -5    2.38    3.13
   8  -8   5    4.75    3.22
   9   8   5  259.29    8.08
   9   8   5  243.36   12.19
   9  -8  -5  249.44    8.18
   9   8  -5  245.51    8.31
   9  -8   5  243.94    8.30
  10   8  -5   10.94    4.23
  10   8   5   10.98    4.09
  10  -8  -5   11.33    3.93
  10  -8   5    2.71    3.65
  11  -8  -5    7.16    4.03
  11   8   5    5.57    4.40
  11   8  -5   -3.20    4.21
  11  -8   5    2.23    3.55
  12   8  -5    5.59    4.85
  12   8   5    4.14    4.71
  12  -8   5    2.86    4.32
  12  -8  -5    4.57    4.37
   0  -9  -5    1.27    2.17
   0   9  -5   -5.63    3.78
   0   9   5   -0.68    4.04
  -1  -9   5   90.27    2.83
  -1   9   5   93.74    7.13
  -1  -9  -5   87.17    3.86
  -1   9  -5   88.14    5.90
   1   9   5   81.65    6.56
   1   9  -5   98.48    7.21
   1  -9  -5   84.52    4.08
  -2  -9   5   -1.76    0.99
   2   9  -5    3.02    4.21
   2   9   5   -0.16    4.45
  -2   9  -5   -0.26    3.23
  -2   9   5   -2.25    3.54
   2   9  -5    0.85    2.30
   2   9   5    2.15    1.66
  -2  -9  -5   -0.86    1.86
   3   9  -5  438.68   13.35
   3   9   5  448.20    8.87
   3   9  -5  463.31    9.70
  -3   9   5  449.14   11.55
   3   9   5  445.59   13.93
   4  -9  -5   92.47    4.10
   4   9  -5  102.18    7.90
   4   9  -5   87.62    4.66
  -4   9   5   96.14    5.96
   4   9   5   95.93    3.82
   4   9   5  112.37    7.93
   4  -9   5   92.90    5.48
   5   9   5  434.98   14.40
   5   9   5  431.15    9.12
   5   9  -5  429.93    9.82
   5  -9  -5  436.52    9.60
   5  -9   5  427.32   10.21
   5   9  -5  434.98   13.52
   6  -9   5   45.44    3.70
   6   9   5   49.77    3.53
   6   9   5   42.98    6.93
   6   9  -5   44.21    6.32
   6   9  -5   44.28    3.81
   6  -9   5   42.27    3.88
   6  -9  -5   48.69    3.66
   7   9   5  327.20   13.31
   7   9   5  332.63    8.36
   7   9  -5  339.56   12.82
   7   9  -5  326.53    8.92
   7  -9   5  343.21    9.22
   7  -9  -5  337.28    8.84
   8  -9  -5   -3.57    2.84
   8   9  -5    4.23    3.49
   8  -9   5    2.36    2.89
   8   9  -5   12.72    5.87
   8   9   5    4.33    3.27
   8   9   5   -1.40    5.97
   9  -9   5   10.72    3.81
   9   9   5   18.02    7.07
   9   9   5   14.46    3.87
   9   9  -5   12.89    6.27
   9  -9  -5   12.46    3.82
   9   9  -5   11.57    4.05
  10   9  -5   35.61    4.93
  10   9   5   43.45    8.26
  10  -9  -5   28.17    4.43
  10   9   5   43.34    4.64
  10  -9   5   27.34    4.50
  11  -9   5   52.05    5.44
  11   9   5   69.38    5.90
  11  -9  -5   70.15    5.77
  11   9  -5   78.91    6.45
  12   9  -5   -0.53    4.76
  12  -9   5   -6.44    4.16
  12  -9  -5   -0.10    4.32
  12   9   5   -1.32    4.40
   0  10   5   15.06    4.87
   0 -10  -5   15.30    2.39
   0  10  -5   24.65    4.85
   1 -10  -5   -0.54    2.35
  -1  10  -5    0.32    3.83
   1  10  -5   -0.12    4.24
  -1 -10  -5   -2.84    1.98
  -1 -10   5   -0.68    1.47
   1  10   5    0.69    4.54
  -1  10   5   -1.73    4.04
  -2  10  -5   85.20    6.59
  -2  10   5   77.62    5.96
   2  10  -5   86.86    6.85
  -2 -10  -5   77.15    3.89
   2  10  -5   79.47    4.28
  -2 -10   5   80.39    2.54
   2  10   5   85.61    7.14
   3  10   5  384.83    8.11
  -3  10   5  393.99   11.15
   3  10  -5  390.95   12.94
   3  10   5  399.75   13.62
   3  10  -5  391.53    9.00
   4 -10  -5   15.48    2.54
   4  10   5   11.73    2.26
   4  10   5    9.76    5.61
   4 -10   5   14.30    3.53
   4  10  -5   13.66    2.89
   4  10  -5   15.92    5.46
  -4  10   5   20.87    3.82
   5  10   5   34.12    6.66
   5 -10  -5   33.79    3.16
   5  10   5   32.24    2.96
   5  10  -5   32.91    6.19
   5  10  -5   31.57    3.46
  -5  10   5   39.13    3.94
   5 -10   5   29.98    3.69
   6  10   5   -7.67    5.57
   6 -10  -5   -2.36    2.62
   6  10  -5    3.76    3.04
   6  10  -5   -2.44    5.26
   6 -10   5    3.39    2.96
   6 -10   5    1.83    2.68
   6  10   5    5.14    2.70
   7 -10   5   63.50    4.90
   7  10   5   78.56    8.50
   7  10  -5   73.27    5.11
   7 -10  -5   77.20    4.83
   7  10  -5   73.46    7.68
   7  10   5   65.83    4.29
   8  10  -5   33.34    4.20
   8  10   5   39.01    4.12
   8  10   5   20.61    7.20
   8  10  -5   25.26    6.64
   8 -10   5   33.72    4.14
   8 -10  -5   39.41    4.11
   9  10   5   29.52    7.72
   9 -10  -5   20.67    3.91
   9  10  -5   35.41    7.07
   9  10   5   36.90    4.39
   9 -10   5   20.50    4.14
   9  10  -5   43.92    4.80
  10  10  -5    9.63    4.37
  10  10   5    5.07    3.89
  10 -10   5   -3.86    3.24
  10 -10  -5    0.01    3.72
  10  10   5   -5.71    6.92
  11  10  -5    0.06    4.46
  11 -10   5   -3.47    4.00
  11 -10  -5    1.52    4.04
  12 -10  -5   52.48    5.65
  12 -10   5   56.50    5.98
  12  10  -5   58.61    6.41
   0  11  -5   -3.50    4.20
   0  11   5   -3.56    4.50
   0 -11  -5    3.88    2.28
   1  11   5  371.52   12.84
  -1 -11  -5  385.74    8.57
  -1 -11   5  375.48    7.49
  -1  11   5  356.99   12.12
  -1  11  -5  390.25   12.09
   1 -11  -5  393.24    9.08
   1  11  -5  370.44   12.45
  -2  11   5  309.48   10.68
  -2  11  -5  295.46   10.42
  -2 -11  -5  312.92    7.30
   2  11  -5  304.34   11.59
   2 -11  -5  313.98    8.32
   2  11   5  307.35   12.30
  -3  11  -5  102.26    7.02
  -3  11   5  116.89    7.19
   3  11  -5  112.51    7.97
   3  11   5  109.69    8.32
   3  11  -5  101.99    4.71
   3  11   5  103.79    4.13
   4  11  -5  148.68    9.47
   4  11  -5  149.98    5.58
   4 -11  -5  150.40    5.17
   4  11   5  143.19    5.02
   4 -11   5  143.95    6.89
   4  11   5  158.06   10.35
  -4  11   5  146.52    7.50
   5  11  -5   60.81    4.43
   5  11   5   64.45    8.00
   5  11   5   64.81    3.92
   5 -11  -5   64.53    4.20
  -5  11   5   67.73    5.02
   5  11  -5   75.30    7.59
   5 -11   5   64.05    4.74
   6 -11   5   67.96    5.09
   6  11  -5   80.13    7.99
   6  11  -5   81.38    4.99
   6  11   5   82.42    8.58
   6  11   5   86.63    4.53
   6 -11  -5   72.34    4.63
   6 -11   5   80.64    5.02
   7  11   5   15.68    3.27
   7 -11   5   12.47    3.48
   7  11  -5   15.19    3.63
   7  11   5   19.72    7.07
   7  11  -5    1.42    5.94
   7 -11  -5   12.07    3.32
   8 -11   5    4.82    3.46
   8  11   5    2.91    3.32
   8  11  -5    3.98    3.62
   8  11  -5    0.87    6.08
   8  11   5    4.97    6.85
   8 -11  -5   -3.43    3.11
   9  11   5   33.96    8.14
   9  11  -5   15.61    6.74
   9 -11   5   24.17    4.26
   9 -11  -5   21.70    4.04
   9  11  -5   17.09    4.31
  10 -11   5    6.36    3.93
  10  11   5    6.61    7.55
  10 -11  -5   -1.23    3.66
  10  11  -5    0.82    4.42
  11 -11   5   22.86    4.91
  11 -11  -5   26.38    4.81
  11  11  -5   23.95    5.22
   0 -12  -5   29.77    3.12
   0  12  -5   24.69    5.47
   0  12   5   18.45    5.66
   0 -12   5   27.48    2.56
   1  12   5  578.94   16.71
  -1 -12  -5  576.37   11.73
  -1  12   5  577.38   15.73
   1 -12  -5  565.31   12.11
  -1  12  -5  555.42   15.39
   1  12  -5  591.93   16.28
   2  12   5  133.84    9.59
  -2  12   5  140.46    8.32
   2 -12  -5  149.02    6.02
   2  12  -5  143.84    9.19
  -2  12  -5  145.91    8.13
  -2 -12  -5  145.08    5.17
   3  12   5   22.34    6.24
  -3  12  -5    6.25    4.17
   3  12  -5    3.32    5.21
   3  12   5   12.43    2.50
  -3  12   5   14.23    4.53
   3  12  -5    9.99    2.85
   4 -12  -5   24.89    2.98
   4 -12   5   21.10    4.28
   4  12   5   19.89    6.45
  -4  12   5   19.82    4.56
   4  12  -5   28.84    3.65
   4  12  -5   22.44    6.17
   5 -12  -5   65.37    4.34
   5  12   5   69.71    8.29
   5  12  -5   64.56    4.64
  -5  12   5   72.49    5.43
   5  12   5   71.50    4.31
   5 -12   5   58.35    5.02
   5  12  -5   68.44    7.70
   6  12  -5    1.55    5.95
   6  12   5   12.09    6.82
   6 -12   5    3.42    3.02
   6 -12  -5    0.33    2.81
   6 -12   5    5.20    3.35
   6  12  -5    4.53    3.23
   7  12  -5  194.89   11.37
   7  12   5  213.79   12.40
   7 -12   5  188.87    6.92
   7  12  -5  191.38    7.16
   7 -12  -5  185.53    6.99
   8 -12   5   -4.09    3.22
   8  12   5   -1.40    6.97
   8 -12  -5   -0.70    3.23
   8  12  -5   -6.64    6.02
   8  12  -5    0.44    3.98
   9 -12  -5    5.16    3.73
   9  12   5    9.85    7.59
   9 -12   5    0.10    3.76
   9  12  -5    6.81    4.18
   9  12  -5   14.10    6.99
  10 -12  -5    6.92    4.06
  10  12  -5    3.16    4.41
  10  12   5   12.44    8.14
  10 -12   5    7.88    4.22
  11 -12  -5   14.67    4.63
  11 -12   5   12.79    4.54
  11  12  -5   29.91    5.80
   0  13   5   -3.52    5.03
   0  13  -5   -0.65    4.81
   0 -13  -5    0.69    2.62
   1 -13  -5  349.53    8.96
  -1  13   5  335.79   12.50
  -1 -13  -5  366.02    8.66
   1  13   5  346.17   13.45
   1  13  -5  360.72   13.03
  -1  13  -5  351.59   12.32
  -2  13   5   77.50    6.79
   2 -13  -5   77.46    5.12
  -2  13  -5   61.94    6.34
   2  13   5   86.83    8.19
   2  13  -5   78.34    7.46
   3  13   5  119.80    9.17
  -3  13  -5  116.76    7.93
   3  13  -5  104.54    8.43
  -3  13   5  102.17    7.24
   3  13  -5  113.27    5.40
  -4  13   5   12.93    4.52
   4 -13   5   12.12    4.33
   4  13  -5   20.47    3.67
   4  13  -5   16.85    6.30
   4  13   5    6.53    6.40
   4 -13  -5   12.77    3.05
   5  13  -5  116.36    9.19
   5  13   5  110.95    9.70
   5 -13   5  118.62    6.86
   5  13  -5  120.87    5.89
   5 -13  -5  102.89    5.10
   6 -13   5  434.22   11.61
   6 -13  -5  450.87   10.79
   6  13  -5  448.77   10.99
   6  13  -5  440.90   15.77
   6 -13   5  431.94   10.93
   6  13   5  452.96   16.80
   7  13  -5   36.12    7.68
   7  13   5   30.28    8.05
   7 -13   5   27.95    4.10
   7 -13  -5   32.16    3.94
   7  13  -5   34.98    4.61
   8 -13  -5  104.32    6.09
   8  13   5  139.55   11.26
   8  13  -5  122.16    6.82
   8 -13   5  111.76    6.22
   8  13  -5  128.26   10.25
   9 -13  -5   -2.41    3.77
   9 -13   5    3.07    3.87
   9  13  -5   17.34    4.53
   9  13  -5   -4.98    6.69
   9  13   5    8.04    7.70
  10 -13  -5   -1.05    3.88
  10 -13   5    2.59    3.94
  10  13   5   -3.06    7.78
  10  13  -5   14.73    5.14
   0 -14  -5  187.57    6.25
   0  14   5  158.71   10.16
   0  14  -5  157.57    9.82
   1  14   5   19.88    6.41
   1 -14  -5   35.92    3.61
   1  14  -5   25.93    6.30
  -1  14   5   29.82    6.18
  -1  14  -5   46.30    6.45
   2 -14  -5  308.14    8.71
   2  14   5  296.70   13.30
  -2  14  -5  294.88   11.58
   2  14  -5  269.70   12.33
  -2  14   5  290.67   11.63
   3 -14  -5   28.94    4.00
  -3  14  -5   31.45    5.57
  -3  14   5   21.99    5.52
   3  14   5   23.67    6.92
   3  14  -5   22.57    6.34
   4 -14   5  170.89    8.49
   4  14  -5  187.29    6.88
   4 -14  -5  180.89    6.26
  -4  14   5  196.99    9.29
   4  14  -5  183.68   10.98
   4  14   5  169.61   11.50
   5 -14   5    1.86    3.91
   5 -14  -5   -4.50    2.70
   5  14   5    9.81    7.07
   5  14  -5    6.74    3.61
   5  14  -5   -3.80    6.13
   6  14   5   10.85    7.36
   6 -14  -5    4.56    3.09
   6  14  -5    8.10    6.59
   6  14  -5    6.78    3.89
   7  14  -5   94.55    5.83
   7  14   5   90.63   10.10
   7  14  -5   92.36    9.27
   7 -14  -5   95.00    5.71
   7 -14   5   87.99    5.65
   8  14  -5   19.83    4.70
   8  14   5   18.35    8.09
   8 -14   5   17.00    4.05
   8  14  -5   16.68    7.39
   8 -14  -5   15.63    3.91
   9 -14   5  179.07    7.79
   9  14   5  169.82   12.75
   9 -14  -5  162.33    7.30
   9  14  -5  171.09    8.16
   9  14  -5  154.82   11.66
  10  14  -5   49.08    5.83
  10  14   5   39.68    9.44
  10 -14   5   45.06    5.28
  10 -14  -5   45.09    5.27
   0  15  -5   -5.28    5.22
   0  15   5    4.56    5.78
   1 -15  -5    7.96    3.35
  -1  15  -5   12.68    5.79
   1  15   5   13.10    6.50
  -1  15   5    3.49    5.46
   1  15  -5   15.88    6.15
  -2  15  -5    6.29    5.19
   2  15  -5   -1.39    5.62
   2 -15  -5   -0.68    3.35
  -2  15   5    2.16    5.32
   2  15   5    2.54    6.39
   3  15  -5    3.04    5.82
  -3  15   5    6.80    5.15
  -3  15  -5   -0.35    4.79
   3  15   5   -0.55    6.35
   3 -15  -5    1.53    3.34
  -4  15   5  134.13    8.73
   4  15   5  142.42   10.79
   4 -15   5  137.78    8.20
   4  15  -5  124.54    5.85
   4  15  -5  134.53   10.28
   4 -15  -5  133.87    5.65
   5  15   5   20.95    7.72
   5 -15   5   26.30    4.91
   5 -15  -5   22.30    3.63
   5  15  -5   22.71    4.22
   5  15  -5   16.42    6.89
   6 -15  -5   91.78    5.49
   6  15  -5   90.29    6.10
   6  15  -5   79.54    9.35
   6  15   5   85.05   10.10
   7  15  -5    7.84    7.14
   7  15  -5   13.21    4.15
   7 -15  -5    4.40    3.67
   7 -15   5    6.76    3.70
   7  15   5   15.83    7.90
   8 -15   5    9.25    3.98
   8 -15  -5    7.78    3.74
   8  15  -5   10.47    4.66
   8  15  -5   -2.55    6.98
   8  15   5    9.29    8.17
   9  15   5   60.56   10.18
   9  15  -5   43.76    9.02
   9 -15   5   50.86    5.37
   9 -15  -5   52.60    5.12
   0  16  -5  453.31   15.41
   0  16   5  427.03   15.51
   1  16   5   96.14    9.24
  -1  16  -5  106.07    8.69
  -1  16   5  113.73    8.88
   1  16  -5  114.19    9.30
  -2  16  -5  -11.65    4.81
   2  16  -5   -3.26    6.00
   2  16   5    1.44    6.36
  -2  16   5    0.90    5.73
   2 -16  -5    6.18    3.59
   3  16  -5    2.97    6.11
   3  16   5    2.69    6.87
  -3  16   5   -5.67    5.04
   3 -16  -5    3.79    3.57
  -3  16  -5    0.79    5.16
   4  16   5   10.87    7.22
   4  16  -5   -2.04    6.27
   4 -16   5    2.64    4.79
  -4  16   5    8.66    5.46
   4 -16  -5    8.25    4.09
   5  16   5  301.84   15.03
   5 -16   5  299.18   10.94
   5  16  -5  316.62    9.42
   5  16  -5  300.72   14.18
   6  16   5   82.49   10.41
   6  16  -5   99.35    9.86
   7  16  -5   42.12    8.67
   7 -16  -5   36.74    4.41
   7  16   5   35.22    9.18
   7 -16   5   40.24    4.75
   8  16   5    7.10    8.31
   8  16  -5   -0.85    7.31
   8 -16   5    4.71    4.05
   8 -16  -5    3.19    3.75
   9  16   5   10.71    8.65
   9 -16   5    2.53    3.98
   9  16  -5    2.01    7.35
   9 -16  -5   -6.52    3.77
   0  17   5   -4.97    5.90
   0  17  -5    2.23    5.95
   1  17   5  250.97   12.99
   1  17  -5  245.99   12.58
  -1  17   5  280.26   12.85
  -1  17  -5  260.68   12.35
   2  17   5  117.01   10.31
  -2  17   5  112.77    9.19
   2  17  -5  121.57   10.10
  -2  17  -5  118.79    8.97
   3  17  -5   12.63    6.90
   3  17   5   11.71    7.27
   3 -17  -5   21.19    4.46
  -3  17  -5   16.15    6.03
  -3  17   5   19.48    6.27
  -4  17   5   21.57    6.26
   4  17   5   30.52    8.40
   4 -17  -5   18.60    4.56
   4  17  -5   26.22    7.50
   4 -17   5   32.04    6.13
   5  17  -5    4.10    6.96
   5  17   5   -0.18    7.42
   5 -17  -5    2.63    4.24
   5 -17   5    1.07    4.71
   6  17   5   18.42    8.59
   6  17  -5   12.05    7.61
   7  17  -5  167.98   12.07
   7  17   5  139.21   12.45
   7 -17   5  144.54    7.07
   8 -17   5   11.64    4.36
   8  17  -5   21.62    8.11
   8  17   5    0.67    8.42
   0  18   5   29.73    7.44
   0  18  -5   18.50    6.97
   1  18  -5   54.57    8.17
  -1  18  -5   58.97    8.03
  -1  18   5   67.22    8.40
   1  18   5   48.52    8.27
   2  18   5   -1.45    6.93
  -2  18   5   -8.47    5.94
   2  18  -5   -8.75    6.10
  -2  18  -5    5.07    5.96
  -3  18  -5   21.25    6.37
   3  18   5   21.79    8.09
  -3  18   5   17.31    6.65
   3  18  -5    7.11    6.83
   4 -18   5    3.43    5.34
   4  18  -5    2.17    6.84
   4  18   5   16.95    7.89
   5  18   5   42.03    9.11
   5 -18  -5   32.45    5.39
   5  18  -5   30.34    8.35
   6  18   5   24.28    8.87
   6 -18  -5   45.61    6.00
   6 -18   5   35.55    4.52
   6  18  -5   30.95    8.49
   7  18  -5    8.82    7.81
   7  18   5    9.54    8.47
   7 -18   5    3.03    4.21
   0  19  -5   -0.44    6.55
   0  19   5    1.12    6.70
   1  19   5    2.15    6.84
   1  19  -5    0.45    6.53
  -1  19  -5   -5.34    6.16
  -1  19   5    5.92    6.89
   2  19   5   30.17    8.01
  -2  19   5   33.08    7.60
   2  19  -5   29.57    7.77
  -2  19  -5   31.29    7.33
   3  19  -5    0.00    6.63
  -3  19   5    0.29    6.51
  -3  19  -5    3.26    6.18
   3  19   5    8.03    7.58
   4  19   5   13.63    8.09
   4  19  -5   19.74    7.68
   4 -19   5   25.11    6.22
   5  19   5   38.86    9.34
   5  19  -5   44.98    8.87
   6  19   5   26.40    9.11
   6 -19   5   30.90    4.76
   6  19  -5   31.03    8.65
   6 -19  -5   20.02    5.63
   0  20   5   30.64    8.21
   0  20  -5   29.05    7.71
  -1  20  -5   -8.23    6.17
   1  20  -5    5.88    6.92
  -1  20   5    5.15    7.24
   1  20   5    5.21    7.13
   2  20  -5   27.20    7.87
  -2  20  -5   18.34    7.03
   2  20   5   27.48    8.35
  -2  20   5   19.90    7.43
   3  20  -5   88.11   10.05
   3  20   5   92.55   10.63
  -3  20   5  101.48    9.75
   4  20  -5    3.22    7.33
   4  20   5   22.45    8.55
   4 -20   5    0.36    5.65
   5  20  -5    6.22    7.78
   5  20   5   12.00    8.53
   0  21  -5   -0.14    6.90
   0  21   5    6.04    7.69
  -1  21   5    3.34    7.68
   1  21  -5    0.70    7.21
  -1  21  -5   20.28    7.54
   1  21   5    7.42    7.81
   2  21  -5    6.18    7.30
   2  21   5   -2.78    7.35
  -2  21   5   11.67    7.71
  -2  21  -5    4.11    6.99
   3  21  -5   47.27    8.95
   3  21   5   64.77   10.17
  -3  21   5   50.34    8.89
   0   0  -6  730.39   11.85
   0   0  -6  737.28   12.44
   0   0   6  724.49   12.37
   1   0   6  441.36    8.48
   1   0  -6  436.15    7.91
  -1   0   6  448.59    7.71
   1   0  -6  438.52    7.57
  -2   0   6 2828.02   45.09
   2   0   6 2790.09   43.74
   2   0  -6 2789.67   43.82
   2   0   6 2792.99   45.04
   3   0  -6    5.74    1.96
   3   0   6    5.25    1.69
   3   0  -6    6.85    1.56
   3   0   6   -0.31    2.60
   4   0   6  396.80    9.58
   4   0  -6  388.47    8.16
   4   0  -6  412.09    7.75
   4   0   6  387.74    7.99
   5   0  -6  254.68    6.56
   5   0   6  261.08    8.00
   5   0  -6  273.68    6.26
   5   0   6  264.45    6.44
   6   0  -6   12.12    2.45
   6   0  -6   11.04    2.70
   6   0   6    4.72    3.41
   6   0   6    9.39    2.43
   7   0   6  222.52    8.39
   7   0  -6  234.09    6.87
   7   0   6  220.07    6.58
   8   0   6  161.03    7.82
   8   0   6  147.24    5.85
   8   0  -6  155.59    6.15
   9   0  -6  140.70    6.23
   9   0   6  134.06    5.99
  10   0  -6   27.34    3.87
  10   0   6   26.68    4.03
  11   0  -6   51.85    5.14
  11   0   6   50.10    4.93
  12   0  -6   17.31    4.51
  12   0   6   13.69    4.46
  13   0  -6   48.16    5.56
  13   0   6   40.06    5.42
   0   1  -6    0.39    1.10
   0   1   6   -2.43    1.76
   0  -1  -6   -1.92    1.10
   0  -1   6    0.97    1.37
   1   1  -6  510.72    8.84
   1  -1  -6  520.60    8.62
   1  -1  -6  504.72    9.22
   1   1  -6  512.12    8.92
  -1   1   6  517.89    9.16
   1  -1   6  513.13    9.29
  -1  -1   6  523.69    9.23
   1   1   6  514.86   10.10
   2   1   6  852.74   13.96
   2   1  -6  841.18   14.24
   2   1   6  822.24   15.71
   2  -1   6  848.75   14.86
   2   1  -6  846.52   14.63
   2  -1  -6  871.57   14.17
   3   1   6   16.97    1.83
   3  -1   6   22.79    2.64
   3  -1   6   18.93    2.04
   3   1  -6   18.53    2.44
   3   1   6   18.33    3.33
   3  -1  -6   20.81    2.11
   3   1  -6   17.31    1.98
   4   1   6   12.42    1.95
   4  -1   6   13.10    1.91
   4  -1  -6   12.08    2.26
   4   1  -6   16.32    2.07
   4   1  -6   17.29    2.60
   4   1   6   10.58    3.35
   4  -1   6   14.59    2.75
   5  -1   6  154.37    6.12
   5  -1  -6  158.35    4.84
   5   1   6  164.40    6.88
   5   1  -6  161.16    5.57
   5   1   6  166.89    4.89
   5  -1   6  156.26    4.97
   5   1  -6  157.98    4.86
   6   1  -6  707.22   13.57
   6  -1   6  693.64   13.42
   6  -1  -6  703.13   13.51
   6   1   6  682.68   13.25
   6  -1   6  707.52   14.55
   6   1   6  683.20   15.25
   6   1  -6  710.58   13.62
   7  -1  -6 1434.78   25.53
   7   1   6 1467.10   27.54
   7   1  -6 1458.54   25.63
   7  -1   6 1455.42   25.42
   7   1  -6 1491.02   25.62
   7  -1   6 1493.52   26.92
   7   1   6 1467.54   25.38
   8   1   6  322.77    8.50
   8   1  -6  320.30    8.56
   8  -1   6  325.27    8.61
   8   1   6  357.28   10.99
   8  -1  -6  319.45    8.53
   8  -1   6  328.53   10.07
   9   1  -6   20.68    3.87
   9  -1  -6   24.00    3.89
   9  -1   6   24.65    3.74
   9   1   6   16.39    3.50
  10  -1  -6   21.60    4.09
  10   1  -6   30.72    4.34
  10   1   6   33.23    4.19
  10  -1   6   26.72    4.09
  11  -1  -6   84.26    5.55
  11   1  -6   93.05    6.08
  11  -1   6   84.09    5.84
  11   1   6   77.99    5.61
  12  -1  -6   62.98    5.77
  12  -1   6   43.18    5.18
  12   1  -6   51.42    5.47
  12   1   6   60.21    5.62
  13   1  -6    8.72    4.64
  13  -1   6   23.26    4.95
  13  -1  -6    4.25    4.40
  13   1   6   10.62    4.62
   0  -2  -6 1935.21   31.20
   0   2   6 1897.73   31.29
   0  -2   6 1879.10   30.78
   0   2  -6 1891.65   29.97
  -1  -2  -6  378.77    7.31
   1  -2  -6  380.91    6.50
   1   2   6  365.29    6.31
   1   2  -6  379.10    6.66
   1   2  -6  362.68    7.91
   1  -2  -6  376.17    7.42
   1   2   6  378.80    8.93
   1   2  -6  375.04    7.00
   1  -2   6  376.25    7.41
  -1   2   6  371.51    7.73
   2   2   6  647.75   10.80
   2  -2  -6  665.11   11.16
   2  -2   6  656.76   11.72
   2   2  -6  650.56   12.27
  -2   2   6  635.52   11.37
   2   2  -6  636.91   11.23
   2   2   6  650.54   13.43
   3   2   6   52.21    2.83
   3   2  -6   50.26    3.55
   3   2  -6   49.21    3.14
   3   2   6   48.78    4.31
   3  -2   6   54.60    3.68
   4   2  -6    2.98    1.88
   4  -2  -6    9.20    1.90
   4   2   6    6.08    3.51
   4  -2   6    9.92    2.15
   4   2   6    3.83    1.84
   4   2  -6    7.72    2.93
   4  -2   6   11.91    2.40
   5  -2  -6   63.87    3.75
   5   2  -6   66.14    4.14
   5   2  -6   60.66    3.81
   5  -2   6   59.29    3.66
   5  -2   6   64.75    4.63
   5   2   6   68.19    3.46
   5   2   6   67.20    5.06
   6  -2   6  118.27    4.83
   6   2   6  122.91    4.63
   6  -2   6  120.55    5.69
   6  -2  -6  127.46    4.93
   6   2  -6  130.51    5.98
   6   2   6  127.86    7.15
   6   2  -6  117.64    4.91
   7   2  -6   56.85    4.37
   7  -2   6   47.23    3.41
   7  -2  -6   51.04    3.80
   7   2   6   54.11    5.51
   7   2   6   41.60    3.45
   7  -2   6   50.27    4.28
   7   2  -6   47.33    3.50
   8  -2   6  120.54    5.62
   8   2   6  137.13    5.53
   8   2   6  142.36    8.27
   8   2  -6  135.99    5.85
   8  -2  -6  131.41    5.48
   8  -2   6  129.41    6.97
   9  -2   6   46.45    4.04
   9   2  -6   50.51    4.57
   9  -2  -6   58.32    4.58
   9   2   6   64.45    4.75
  10  -2  -6   91.10    5.71
  10  -2   6   96.67    5.80
  10   2  -6   90.66    5.51
  10   2   6   94.08    5.58
  11   2  -6  149.11    7.17
  11  -2   6  137.69    6.86
  11   2   6  152.36    6.93
  11  -2  -6  157.18    7.20
  12  -2  -6   45.71    5.26
  12  -2   6   49.50    5.32
  12   2  -6   43.63    5.30
  12   2   6   40.52    5.09
  13   2  -6  249.17    9.61
  13  -2  -6  234.02    9.12
  13  -2   6  241.34    9.39
  13   2   6  253.34    9.50
   0   3   6    1.92    2.95
   0  -3  -6    2.46    1.67
   1   3  -6   41.76    2.82
   1  -3   6   46.42    2.90
   1  -3  -6   41.24    2.05
  -1   3   6   43.96    3.31
   1   3   6   39.70    1.49
   1   3  -6   40.73    3.42
  -1  -3  -6   44.26    2.64
   1  -3  -6   50.54    2.97
   1   3   6   42.51    4.03
   2   3   6  363.72    6.47
   2   3  -6  368.77    7.25
   2  -3   6  366.18    7.66
  -2   3   6  354.46    7.66
   2  -3  -6  376.18    6.84
   2   3  -6  370.69    8.90
   2   3   6  345.14    9.65
   3  -3   6   20.25    2.32
   3   3  -6   20.10    2.27
   3   3   6   22.61    4.11
   3   3  -6   23.45    3.47
   4   3   6   57.20    5.04
   4   3  -6   47.55    4.09
   4  -3   6   53.40    3.43
   4  -3  -6   51.38    3.28
   4  -3   6   48.36    3.51
   4   3  -6   50.88    3.08
   4   3   6   49.48    2.84
   5   3   6  128.54    7.35
   5  -3   6  135.44    5.03
   5  -3   6  144.57    4.91
   5   3  -6  140.91    4.94
   5   3  -6  133.56    6.45
   5   3   6  142.84    4.47
   5  -3  -6  141.86    4.83
   6   3   6   28.46    2.81
   6  -3   6   32.97    3.30
   6  -3  -6   33.21    2.86
   6  -3   6   29.84    3.03
   6   3  -6   28.42    3.14
   6   3  -6   21.52    3.89
   6   3   6   29.83    4.83
   7   3  -6   -0.06    3.55
   7   3   6    2.48    2.54
   7   3  -6    3.37    2.84
   7  -3   6   -0.06    3.00
   7   3   6   -3.49    4.22
   7  -3  -6    0.52    2.63
   7  -3   6    4.26    2.68
   8   3   6   71.73    6.56
   8   3  -6   61.47    4.44
   8   3   6   64.22    4.42
   8  -3  -6   53.92    4.25
   8  -3   6   57.54    4.24
   9  -3  -6   32.64    4.05
   9   3   6   36.74    6.17
   9  -3   6   42.19    4.21
   9   3  -6   37.28    4.02
   9   3   6   23.11    3.79
  10  -3   6  170.49    7.03
  10   3   6  175.41    6.92
  10  -3  -6  160.92    6.93
  10   3  -6  169.60    7.12
  11   3  -6   28.67    4.67
  11  -3   6   24.30    4.41
  11   3   6   27.06    4.49
  11  -3  -6   26.34    4.51
  12   3  -6   75.90    5.76
  12  -3   6   75.19    5.98
  12  -3  -6   60.18    5.72
  12   3   6   76.69    5.80
  13  -3  -6   48.53    5.68
  13   3   6   55.76    5.79
  13  -3   6   46.63    5.54
  13   3  -6   47.25    5.83
   0   4  -6  886.49   16.58
   0   4   6  895.25   17.10
   0  -4  -6  897.26   15.62
   1  -4  -6   58.34    3.17
   1   4   6   57.27    1.86
  -1  -4  -6   62.55    3.44
   1  -4  -6   56.27    2.31
   1   4  -6   59.01    4.11
   1   4  -6   62.90    3.18
   1   4   6   57.60    4.66
   1  -4   6   57.10    4.31
  -1   4   6   60.79    3.99
   2  -4  -6   48.53    2.64
   2   4   6   44.08    2.02
   2  -4   6   49.05    3.03
   2   4  -6   45.54    3.02
   2   4   6   43.67    4.62
  -2   4   6   47.08    3.31
   2   4  -6   46.63    4.08
  -3   4   6 1324.09   22.19
   3   4  -6 1335.61   24.19
   3  -4   6 1347.83   22.52
   3  -4  -6 1348.94   21.87
   3   4   6 1334.53   21.51
   3   4  -6 1291.44   22.13
   3   4   6 1332.79   25.04
   4   4   6  637.84   15.05
   4  -4  -6  657.77   11.02
   4   4  -6  649.27   12.18
   4   4  -6  627.39   14.00
   4   4   6  632.83   11.55
   4  -4   6  647.35   12.16
   4  -4  -6  654.52   11.94
   5   4  -6  289.88    9.05
   5   4   6  286.99   10.07
   5   4  -6  289.40    7.17
   5  -4   6  298.10    7.16
   5   4   6  284.74    6.71
   5  -4  -6  294.44    7.08
   5  -4   6  299.51    7.26
   6  -4   6  412.31    9.35
   6  -4  -6  426.04    9.31
   6   4  -6  404.18    9.35
   6   4  -6  416.47   11.13
   6  -4   6  414.42    9.40
   6   4   6  403.87   12.26
   6   4   6  419.66    8.92
   7  -4   6   27.59    3.06
   7  -4   6   26.24    3.43
   7   4  -6   20.33    4.50
   7   4   6   26.32    5.23
   7  -4  -6   24.09    3.22
   7   4  -6   21.69    3.05
   7   4   6   25.36    3.08
   8  -4  -6  639.75   13.43
   8   4  -6  636.17   13.67
   8   4   6  625.01   16.58
   8   4   6  628.05   13.13
   8  -4   6  651.90   13.69
   9   4   6  158.35    9.58
   9   4   6  151.21    6.19
   9   4  -6  141.62    6.57
   9  -4  -6  142.20    6.37
   9  -4   6  157.77    6.20
  10  -4   6  145.90    6.37
  10  -4  -6  145.05    6.36
  10   4   6  137.78    6.33
  10   4  -6  145.71    6.83
  11  -4  -6  209.19    8.22
  11  -4   6  238.21    8.58
  11   4  -6  225.44    8.54
  11   4   6  231.36    8.15
  12  -4   6  109.89    6.80
  12  -4  -6   97.10    6.58
  12   4   6   91.34    6.33
  12   4  -6   97.75    6.68
  13  -4  -6  181.18    8.19
  13   4   6  164.57    8.40
  13   4  -6  174.97    8.17
  13  -4   6  190.75    8.59
   0   5   6   -5.66    3.39
   0   5  -6    0.34    3.00
   0  -5  -6   -0.86    1.73
   1   5  -6 3605.70   55.66
   1   5   6 3498.48   55.58
  -1   5   6 3541.61   57.80
   1  -5  -6 3564.84   57.79
   1   5   6 3516.16   58.64
   1   5  -6 3533.57   58.03
  -1   5  -6 3538.76   57.45
  -1  -5  -6 3596.47   57.61
   2  -5   6   26.75    2.94
  -2   5   6   20.49    3.21
   2   5   6   22.41    1.54
   2   5  -6   23.86    3.86
   2  -5  -6   18.24    1.84
   2   5   6   17.07    4.25
   2   5  -6   19.47    2.27
   3   5  -6   88.63    3.78
   3   5  -6   90.37    6.36
  -3   5   6   93.29    4.44
   3  -5   6   79.59    4.11
   3   5   6   83.31    2.91
   3   5   6   75.41    5.74
   3  -5  -6   87.06    3.55
   4  -5  -6  961.32   16.58
   4   5  -6  959.39   19.18
   4   5   6  946.51   16.15
   4  -5   6  949.96   16.94
   4   5   6  924.23   19.95
   4   5  -6  942.82   16.83
   5   5   6  252.68    6.18
   5  -5  -6  261.20    6.53
   5   5   6  265.16   10.02
   5  -5   6  256.55    6.61
   5   5  -6  258.15    9.06
   5  -5   6  245.03    6.46
   5  -5  -6  253.92    5.11
   5   5  -6  243.44    6.67
   6   5  -6   12.26    2.84
   6   5  -6   17.07    4.43
   6   5   6   16.64    5.04
   6  -5   6   11.86    2.49
   6  -5   6   18.58    2.70
   6   5   6   14.62    2.67
   6  -5  -6   16.05    2.71
   7  -5   6 1158.63   21.07
   7  -5  -6 1131.28   20.97
   7   5  -6 1172.85   21.13
   7   5   6 1178.95   24.82
   7   5   6 1143.77   20.60
   7  -5   6 1151.91   21.15
   7   5  -6 1157.47   23.37
   8  -5  -6   34.79    3.60
   8   5   6   30.17    3.63
   8   5  -6   37.56    4.08
   8   5  -6   29.48    5.38
   8  -5   6   35.62    3.60
   8   5   6   38.35    6.39
   9   5  -6   41.32    4.48
   9   5   6   43.49    4.16
   9  -5   6   44.71    4.38
   9  -5  -6   35.45    3.90
   9   5   6   53.13    7.14
  10  -5  -6  293.13    9.16
  10   5  -6  297.39    9.14
  10  -5   6  309.22    9.15
  10   5   6  315.27    9.10
  11  -5   6  103.73    6.41
  11   5   6  102.23    6.25
  11   5  -6  115.32    6.73
  11  -5  -6  108.37    6.45
  12  -5   6   76.68    5.85
  12   5   6   95.47    6.39
  12   5  -6   85.03    6.39
  12  -5  -6   66.76    5.85
  13  -5  -6   46.39    5.82
  13   5  -6   54.04    6.08
  13   5   6   53.95    5.88
  13  -5   6   49.68    5.79
   0   6  -6 1707.64   30.04
   0   6   6 1683.38   30.49
   0  -6  -6 1727.18   28.69
  -1   6  -6   37.77    3.80
  -1  -6  -6   38.80    2.90
  -1   6   6   40.39    4.26
   1   6   6   38.30    4.76
   1   6  -6   44.82    4.43
   1   6  -6   43.32    3.06
   1  -6  -6   38.15    2.97
   2   6   6 1148.09   23.45
   2  -6  -6 1207.50   19.59
   2  -6   6 1192.01   21.48
   2   6  -6 1157.57   20.11
   2   6   6 1202.95   19.22
   2   6  -6 1201.55   22.82
  -2   6   6 1206.22   21.83
  -2  -6  -6 1201.09   20.52
   3  -6   6  119.98    5.00
   3   6  -6  121.36    4.33
   3   6  -6  109.30    7.14
   3  -6  -6  121.27    4.07
   3   6   6  114.05    3.42
  -3   6   6  120.91    5.29
   3   6   6  113.62    7.65
   4  -6  -6  141.77    4.56
   4   6  -6  151.24    7.65
   4   6   6  129.70    8.17
  -4   6   6  145.67    4.99
   4  -6   6  143.31    5.05
   4   6  -6  141.79    4.84
   4   6   6  134.41    4.09
   5   6  -6  283.02    7.25
   5  -6  -6  283.26    6.95
   5  -6   6  281.89    7.31
   5  -6   6  278.84    7.02
   5  -6  -6  277.55    6.08
   5   6   6  290.15    6.62
   5   6  -6  259.42    9.69
   5   6   6  285.72   10.86
   6  -6  -6   90.26    4.44
   6   6   6   91.97    7.16
   6   6  -6   89.03    4.61
   6   6   6   82.77    4.22
   6  -6   6   85.21    4.64
   6  -6   6   88.20    4.48
   6   6  -6   89.83    6.39
   7  -6   6   25.77    3.25
   7   6  -6   12.99    3.21
   7   6  -6   20.25    5.03
   7   6   6   12.96    5.61
   7  -6   6   15.26    3.18
   7  -6  -6   15.27    3.15
   8   6   6   -2.85    2.74
   8   6  -6   -0.49    3.17
   8   6   6    1.03    5.49
   8   6  -6    0.45    4.88
   8  -6  -6    5.01    3.15
   8  -6   6    0.94    3.03
   9   6  -6   52.05    4.43
   9  -6   6   43.46    4.07
   9   6   6   44.86    4.18
   9   6   6   59.46    7.58
   9  -6  -6   50.64    4.21
  10   6  -6   22.51    4.29
  10   6   6   24.74    4.13
  10  -6  -6   15.68    3.98
  10  -6   6   13.25    3.91
  11  -6  -6    2.07    3.91
  11   6  -6   12.92    4.46
  11  -6   6    0.17    3.80
  11   6   6   10.56    4.37
  12  -6  -6   26.82    4.60
  12  -6   6   23.24    4.70
  12   6  -6   43.77    5.54
  12   6   6   25.56    5.12
  13   6  -6   23.60    5.61
  13  -6  -6    8.07    4.74
  13  -6   6   12.25    4.69
  13   6   6   15.70    4.96
   0   7   6   -3.35    3.72
   0   7  -6    0.87    3.42
   0  -7  -6   -0.77    1.96
  -1  -7   6   75.22    2.18
   1   7  -6   68.96    3.51
   1   7   6   68.22    5.72
  -1   7  -6   76.26    4.87
  -1   7   6   77.10    5.28
   1  -7  -6   74.75    3.79
  -1  -7  -6   73.43    3.35
   1   7  -6   73.76    5.40
   2   7  -6   44.04    4.91
   2   7   6   39.02    2.45
   2   7  -6   37.59    2.84
  -2  -7  -6   38.65    2.56
  -2   7   6   41.86    4.18
   2   7   6   36.72    5.14
   3  -7   6   -0.38    2.53
   3   7  -6   -4.81    3.84
  -3   7   6    0.88    2.84
   3   7  -6   -1.04    2.06
   3   7   6   -0.22    1.63
   3  -7  -6   -0.56    1.72
   3   7   6    4.41    4.44
   4   7  -6  669.21   16.05
   4   7   6  658.07   16.75
   4  -7   6  680.07   13.37
   4  -7  -6  672.03   12.55
   4   7  -6  671.16   12.90
   4   7   6  674.45   12.11
  -4   7   6  663.48   13.29
   5  -7  -6  402.13    8.56
   5   7   6  400.61   13.14
   5   7  -6  405.66    9.19
   5   7   6  399.23    8.49
   5  -7   6  408.70    9.23
   5  -7  -6  410.58    9.00
   5   7  -6  429.67   12.42
   6  -7   6   18.99    3.10
   6   7  -6   20.93    3.24
   6   7   6   24.47    5.79
   6   7  -6   22.73    5.07
   6  -7   6   19.08    2.75
   6   7   6   26.49    2.91
   6  -7  -6   16.86    2.88
   7  -7  -6   60.36    4.35
   7   7   6   65.01    7.17
   7  -7   6   60.15    4.55
   7  -7   6   63.30    4.04
   7   7  -6   57.21    4.23
   7   7  -6   63.63    6.47
   7   7   6   56.90    4.00
   8   7   6  377.57   13.93
   8   7   6  390.47    9.66
   8  -7  -6  386.40    9.94
   8   7  -6  407.13   10.26
   8  -7   6  390.08    9.97
   8   7  -6  386.78   12.94
   9  -7   6  351.14    9.94
   9   7  -6  354.86   10.03
   9   7   6  361.36    9.61
   9  -7  -6  351.01    9.76
   9   7   6  353.01   13.82
  10  -7  -6   64.52    5.19
  10   7  -6   63.56    5.40
  10   7   6   64.18    5.15
  10  -7   6   61.03    5.11
  11   7  -6   80.71    6.13
  11   7   6   84.85    6.27
  11  -7  -6   73.45    5.47
  11  -7   6   82.25    6.09
  12   7   6  101.02    6.62
  12  -7  -6   86.89    6.47
  12   7  -6   90.18    6.77
  12  -7   6   88.24    6.17
   0   8   6  334.22   10.95
   0   8  -6  345.85   10.31
   0  -8  -6  345.54    7.64
  -1   8   6   18.93    4.17
  -1  -8   6   21.65    1.44
  -1  -8  -6   17.98    2.33
   1   8   6   17.87    4.76
   1   8  -6   17.08    4.35
  -1   8  -6   19.27    3.92
   1  -8  -6   15.18    2.46
  -2   8   6   12.62    3.87
  -2   8  -6   17.55    3.61
   2   8  -6    9.15    4.27
   2   8  -6    9.82    2.35
   2   8   6   13.04    4.73
   2   8   6   13.85    1.75
  -2  -8  -6   16.01    2.20
   3   8  -6   58.86    3.73
   3   8   6   58.95    6.20
   3  -8   6   60.64    4.27
  -3   8   6   68.55    4.65
   3   8   6   55.11    2.97
   3   8  -6   53.84    5.64
   3  -8  -6   60.24    3.44
   4   8   6  109.94    3.95
   4  -8   6  113.09    5.35
   4  -8  -6  106.06    4.21
   4   8  -6  110.09    4.66
   4   8  -6  108.44    7.15
   4   8   6  108.92    8.27
  -4   8   6  103.13    5.64
   5   8  -6  416.46    9.48
   5   8   6  394.22   13.36
   5   8   6  405.40    8.59
   5  -8  -6  414.07    9.08
   5   8  -6  399.59   12.60
   5  -8   6  416.06    9.55
   6   8  -6   44.87    3.73
   6  -8   6   50.11    3.62
   6   8  -6   31.79    5.72
   6  -8  -6   38.47    3.40
   6   8   6   36.41    6.48
   6   8   6   43.26    3.13
   6  -8   6   40.71    3.46
   7  -8  -6    4.00    2.84
   7   8   6    7.13    2.98
   7  -8   6    5.29    3.09
   7  -8   6    3.41    2.66
   7   8  -6    2.29    5.15
   7   8  -6    2.03    3.05
   7   8   6    2.59    5.66
   8  -8   6  246.17    7.80
   8  -8  -6  255.87    7.89
   8   8  -6  233.34    7.90
   8   8   6  234.49   11.92
   8   8   6  261.90    7.46
   8   8  -6  256.46   11.25
   9   8   6   20.71    3.71
   9  -8   6   13.79    3.82
   9  -8  -6   22.64    3.89
   9   8  -6   18.17    4.08
   9   8   6   30.05    7.21
  10  -8  -6   84.20    5.79
  10   8   6   77.02    5.73
  10   8  -6   78.22    6.00
  10  -8   6   78.20    5.70
  10   8   6   79.55    9.10
  11   8   6    4.43    4.33
  11  -8  -6   -4.32    3.69
  11   8  -6   10.97    4.55
  11  -8   6    7.93    4.18
  12  -8  -6   -3.23    4.22
  12  -8   6    1.11    4.28
  12   8  -6    3.91    5.03
  12   8   6   -0.82    4.55
   0  -9  -6   -1.05    2.09
   0   9   6    0.20    4.15
   0   9  -6   -4.78    3.75
  -1  -9   6  318.75    6.08
   1   9   6  290.82   10.98
  -1   9  -6  313.53   10.10
  -1  -9  -6  315.79    7.27
  -1   9   6  317.69   10.56
   1  -9  -6  308.04    7.55
   1   9  -6  314.82   10.56
   2   9  -6  121.71    7.84
  -2   9  -6  123.48    6.96
   2   9  -6  126.00    4.65
  -2  -9  -6  126.39    4.38
   2   9   6  125.97    3.75
  -2   9   6  119.58    7.03
   2   9   6  119.90    8.40
   3  -9  -6   64.31    3.54
  -3   9   6   60.94    4.90
   3   9  -6   58.97    6.08
   3  -9   6   60.21    4.68
   3   9   6   62.65    6.59
   3   9  -6   63.82    3.89
   3   9   6   60.83    3.15
   4   9  -6  664.77   16.87
   4  -9  -6  663.16   12.58
   4  -9   6  647.66   13.94
   4   9   6  634.94   12.05
   4   9   6  652.47   17.53
   4   9  -6  654.97   13.13
  -4   9   6  668.16   14.23
  -5   9   6    1.58    2.67
   5   9   6    1.17    5.41
   5  -9   6    3.00    2.67
   5   9  -6    7.21    2.79
   5   9   6    5.95    2.25
   5   9  -6   -2.65    4.65
   5  -9  -6    1.81    2.51
   6   9   6    0.58    2.55
   6   9   6    1.48    5.62
   6  -9  -6    3.46    2.62
   6   9  -6    0.24    2.93
   6  -9   6    0.18    2.79
   6  -9   6    2.65    2.64
   6   9  -6    1.74    5.01
   7  -9  -6  130.98    5.63
   7   9  -6  126.84    9.29
   7   9   6  133.41    9.53
   7  -9   6  135.68    5.96
   7   9   6  129.25    5.38
   7   9  -6  131.43    5.88
   8   9   6    2.53    3.26
   8   9  -6   -8.02    5.27
   8  -9  -6   -3.93    3.04
   8   9  -6    5.79    3.48
   8  -9   6    1.99    3.26
   8   9   6   -7.72    5.97
   9   9   6    1.30    6.65
   9  -9  -6    3.46    3.36
   9   9  -6    6.07    3.91
   9   9   6    5.46    3.64
   9  -9   6    0.11    3.38
  10   9   6   63.19    8.83
  10   9  -6   72.48    5.84
  10  -9   6   69.12    5.54
  10   9   6   64.71    5.15
  10  -9  -6   61.44    5.18
  11   9  -6   74.73    6.19
  11  -9  -6   68.67    5.75
  11   9   6   69.97    5.86
  11  -9   6   60.13    5.36
  12  -9  -6   -4.06    4.02
  12  -9   6    0.88    3.89
  12   9  -6    4.52    4.85
   0  10  -6  131.37    7.75
   0  10   6  117.61    8.27
   0 -10  -6  125.15    4.59
  -1 -10  -6   10.30    2.36
   1  10  -6    3.97    4.36
  -1  10  -6    4.43    4.00
  -1  10   6    4.25    4.36
   1 -10  -6    8.62    2.46
  -1 -10   6   14.94    1.64
   1  10   6    9.41    4.99
  -2  10   6   26.67    4.70
  -2 -10  -6   21.73    2.60
   2  10  -6   24.05    3.02
   2  10  -6   24.16    5.12
   2 -10  -6   22.97    3.17
   2  10   6   28.40    5.81
  -2  10  -6   24.21    4.30
   3  10  -6  514.73   14.83
   3  10   6  510.12    9.89
  -3  10   6  514.22   13.01
   3  10   6  526.76   15.58
   3  10  -6  509.26   10.83
   3 -10  -6  522.70   10.26
   4 -10   6  165.63    6.90
   4  10  -6  161.80    5.66
   4  10  -6  167.97    9.49
   4  10   6  144.74    9.78
   4 -10  -6  155.69    5.30
   4  10   6  158.48    4.79
  -4  10   6  160.93    7.27
   5  10   6  244.38   11.72
   5  10  -6  266.13    7.51
  -5  10   6  263.58    8.16
   5  10   6  255.10    6.66
   5 -10  -6  258.78    7.03
   5 -10   6  258.57    7.90
   5  10  -6  255.41   11.20
   6  10  -6  687.95   14.26
   6  10   6  689.76   13.38
   6  10  -6  702.99   18.54
   6 -10   6  671.76   14.30
   6  10   6  666.91   19.26
   6 -10  -6  696.01   13.95
   6 -10   6  674.50   14.26
   7  10   6   16.56    6.86
   7  10  -6   20.90    6.27
   7 -10  -6    9.00    3.18
   7  10  -6   14.27    3.69
   7 -10   6   11.47    3.47
   7  10   6   18.06    3.19
   8  10   6   55.04    8.22
   8  10  -6   49.72    7.31
   8 -10  -6   57.31    4.52
   8  10  -6   59.63    4.90
   8 -10   6   51.55    4.62
   8  10   6   60.60    4.47
   9  10   6  419.37   16.30
   9  10  -6  446.83   11.58
   9  10   6  424.52   10.86
   9 -10  -6  413.06   11.14
   9  10  -6  425.17   15.06
   9 -10   6  456.18   11.73
  10 -10   6   25.43    4.58
  10  10  -6   23.83    5.05
  10  10   6   37.37    8.27
  10 -10  -6   23.88    4.41
  10  10   6   20.71    4.20
  11 -10  -6   94.79    6.45
  11  10  -6   94.83    6.94
  11 -10   6   93.58    6.57
  12 -10  -6   -0.77    4.25
  12 -10   6    2.21    4.41
  12  10  -6    1.03    5.04
   0  11   6   -2.23    4.54
   0 -11  -6   -2.33    2.14
   0  11  -6   -0.82    4.29
   1 -11  -6  241.67    6.71
  -1  11   6  219.37    9.89
  -1  11  -6  218.36    9.34
   1  11  -6  222.50   10.05
  -1 -11  -6  222.50    6.26
   1  11   6  227.07   10.69
  -2 -11  -6  103.21    4.29
   2 -11  -6  106.09    5.08
   2  11   6  102.41    7.95
  -2  11  -6  103.10    7.07
  -2  11   6   84.03    6.46
   2  11  -6   98.13    7.37
  -3  11   6   45.82    5.15
   3  11   6   37.48    2.77
   3  11  -6   37.55    3.47
   3  11  -6   45.05    6.27
   3  11   6   39.49    6.60
   4  11  -6  223.54   10.82
   4  11  -6  233.69    7.12
   4 -11  -6  231.92    6.54
   4  11   6  221.47   11.55
   4  11   6  229.17    6.10
   4 -11   6  226.98    8.28
  -4  11   6  222.89    8.65
   5  11   6  111.74    9.03
   5  11   6  104.63    4.42
   5 -11   6  107.81    5.98
  -5  11   6  106.33    6.31
   5  11  -6  104.11    5.16
   5  11  -6   87.20    8.04
   5 -11  -6  106.12    4.83
   6  11  -6  408.39   10.22
   6  11   6  406.23    9.31
   6 -11  -6  399.56    9.78
   6  11  -6  416.20   14.39
   6 -11   6  412.88   10.48
   6 -11   6  417.41   10.33
   6  11   6  423.43   15.48
   7  11   6  109.14    5.07
   7  11  -6  100.18    5.66
   7 -11  -6   98.31    5.28
   7  11   6  102.23    9.51
   7  11  -6  107.14    8.80
   7 -11   6  104.29    5.69
   8  11  -6   -1.49    3.64
   8  11  -6    3.98    6.04
   8  11   6   12.90    7.03
   8 -11   6    0.56    2.92
   8 -11  -6    2.39    3.19
   9 -11   6  202.02    8.03
   9 -11  -6  201.90    7.59
   9  11   6  214.35   13.01
   9  11  -6  205.34    8.06
   9  11  -6  201.48   11.59
  10 -11   6   35.00    4.95
  10  11  -6   23.16    4.93
  10 -11  -6   24.13    4.41
  10  11   6   38.01    8.81
  11 -11   6  119.54    6.82
  11  11  -6  122.33    7.54
  11 -11  -6  120.49    7.00
   0  12   6 1061.22   24.11
   0 -12   6 1058.63   18.80
   0 -12  -6 1074.77   19.79
   0  12  -6 1082.00   23.64
  -1  12   6   73.25    6.74
   1  12  -6   58.35    6.62
  -1  12  -6   71.71    6.39
   1  12   6   67.65    7.25
  -1 -12  -6   74.96    4.41
   1 -12  -6   60.85    4.22
   2  12  -6   61.22    6.97
  -2  12   6   67.64    6.35
  -2  12  -6   56.56    5.91
  -2 -12  -6   61.60    3.94
   2 -12  -6   71.68    4.91
   2  12   6   70.87    7.56
   3  12   6   68.73    7.62
  -3  12   6   65.94    6.08
   3  12  -6   58.35    6.90
   3  12   6   54.98    3.54
   3  12  -6   63.49    4.27
   4  12  -6  791.94   20.46
   4 -12   6  798.54   17.59
   4  12   6  824.37   14.81
   4  12   6  759.90   21.13
  -4  12   6  832.44   18.10
   4 -12  -6  778.00   15.17
   4  12  -6  774.01   15.66
   5  12   6  227.82   12.39
   5 -12   6  238.83    8.48
   5  12  -6  226.12   11.41
   5 -12  -6  241.89    7.02
   5  12  -6  248.74    7.78
   6  12   6   59.57    8.32
   6 -12  -6   50.54    4.05
   6  12  -6   64.26    7.78
   6 -12   6   50.94    4.58
   6  12  -6   51.08    4.64
   7  12  -6    9.27    6.46
   7 -12   6    8.25    3.51
   7 -12  -6    5.52    3.22
   7  12  -6   11.26    3.78
   7  12   6   11.95    7.19
   8  12  -6   15.53    4.14
   8  12  -6   17.06    6.92
   8  12   6   16.95    7.80
   8 -12   6   17.33    4.00
   8 -12  -6   25.00    4.11
   9 -12  -6  221.25    8.01
   9 -12   6  252.71    8.71
   9  12  -6  212.57    8.39
   9  12  -6  227.55   12.33
   9  12   6  235.19   13.72
  10 -12   6  135.14    7.21
  10 -12  -6  130.05    6.92
  10  12   6  140.75   11.79
  10  12  -6  133.09    7.74
  11 -12   6    3.85    4.43
  11  12  -6    2.60    4.88
  11 -12  -6   -4.42    4.08
   0 -13  -6   -0.39    2.63
   0  13  -6    3.18    4.83
   0  13   6   -7.06    4.87
   1 -13  -6  316.05    8.62
   1  13   6  339.54   13.49
  -1  13  -6  344.33   12.22
  -1  13   6  363.46   12.77
  -1 -13  -6  345.73    8.46
   1  13  -6  358.55   12.85
   2  13  -6   12.00    5.70
   2 -13  -6   16.85    3.38
  -2  13  -6   20.07    5.13
  -2  13   6   14.82    5.08
   2  13   6   17.77    6.28
   3  13  -6   83.56    7.76
  -3  13   6   89.42    6.98
   3  13   6   88.30    8.58
   3  13  -6   82.08    5.08
   3 -13  -6   87.16    5.39
  -3  13  -6   93.70    6.84
   4 -13   6   -3.51    3.75
   4  13   6    0.30    6.12
   4  13  -6    6.01    5.78
  -4  13   6    2.06    4.10
   4 -13  -6    0.19    2.48
   4  13  -6    1.09    3.02
   5 -13   6    2.09    3.73
   5  13   6   -5.12    6.25
   5  13  -6    5.28    6.08
   5  13  -6    6.53    3.29
   5 -13  -6    3.86    2.78
   6  13  -6   92.23    5.46
   6  13  -6   83.85    8.65
   6 -13   6   82.70    5.98
   6 -13  -6   93.71    5.12
   6  13   6   86.77    9.54
   7 -13   6    0.64    3.29
   7 -13  -6    1.61    3.31
   7  13  -6    1.55    3.61
   7  13   6    4.97    7.16
   7  13  -6    6.27    6.62
   8 -13   6  147.16    6.91
   8  13   6  173.58   12.54
   8  13  -6  158.46   11.10
   8  13  -6  148.30    7.08
   8 -13  -6  151.39    6.63
   9  13   6  329.77   15.80
   9 -13   6  336.13   10.38
   9 -13  -6  301.49    9.65
   9  13  -6  336.91   10.67
   9  13  -6  340.15   14.75
  10 -13  -6   21.32    4.48
  10 -13   6   12.12    4.40
  10  13   6    8.23    8.38
  10  13  -6   17.65    5.06
   0  14  -6   55.27    6.85
   0 -14  -6   56.10    4.13
   0  14   6   65.21    7.46
  -1  14   6    1.32    5.22
   1 -14  -6   -1.45    2.98
   1  14  -6   -5.35    5.15
   1  14   6   -8.64    5.46
  -1  14  -6    0.83    4.94
  -2  14   6   44.63    6.42
   2 -14  -6   48.18    4.19
   2  14   6   46.24    7.59
  -2  14  -6   36.32    6.00
   2  14  -6   32.91    6.52
   3  14  -6  515.22   16.59
   3 -14  -6  506.71   12.46
  -3  14   6  515.36   15.03
   3  14   6  519.25   17.52
  -3  14  -6  560.53   15.30
   4 -14  -6   22.25    3.30
   4  14   6   21.52    7.29
  -4  14   6   28.45    5.29
   4  14  -6   14.54    3.77
   4 -14   6   17.27    4.66
   4  14  -6   17.58    6.50
   5  14   6  109.50   10.24
   5 -14   6  122.50    7.15
   5  14  -6  117.43    9.54
   5  14  -6  125.35    5.90
   5 -14  -6  122.90    5.37
   6  14  -6  138.42   10.64
   6 -14  -6  144.48    6.06
   6  14  -6  147.18    6.52
   6  14   6  161.64   11.97
   7  14   6   51.87    9.15
   7 -14   6   32.87    4.42
   7 -14  -6   43.88    4.30
   7  14  -6   42.69    5.00
   7  14  -6   43.27    7.83
   8  14  -6  121.36   10.14
   8 -14  -6  102.26    6.05
   8 -14   6   98.59    6.18
   8  14  -6   96.96    6.34
   8  14   6   99.03   10.84
   9  14  -6   44.73    8.57
   9 -14  -6   34.73    4.80
   9 -14   6   25.43    4.60
   9  14   6   46.63    9.27
   9  14  -6   40.63    5.63
  10 -14  -6    2.06    4.14
  10 -14   6    4.01    4.31
  10  14   6   -1.86    7.93
  10  14  -6   14.10    5.46
   0  15  -6   -4.79    5.28
   0  15   6   -4.31    5.50
   1  15   6   85.99    8.70
   1  15  -6   79.37    8.15
  -1  15   6   91.28    8.27
  -1  15  -6   94.89    8.09
   1 -15  -6   90.05    5.14
   2  15   6  134.72   10.39
  -2  15   6  127.35    9.17
  -2  15  -6  150.34    9.43
   2  15  -6  142.90    9.99
   2 -15  -6  143.81    6.28
  -3  15  -6  370.10   12.82
   3 -15  -6  352.24    9.99
  -3  15   6  353.72   12.80
   3  15   6  351.32   15.04
   3  15  -6  349.50   14.15
   4  15   6   10.81    7.06
   4 -15   6    5.11    4.50
   4 -15  -6    5.22    2.99
   4  15  -6    2.78    3.33
   4 -15  -6    1.14    3.81
  -4  15   6   -1.72    4.73
   4  15  -6    8.84    6.31
   5  15  -6    5.57    6.44
   5 -15   6    8.96    4.26
   5  15   6    3.01    6.95
   5  15  -6    1.60    3.79
   5 -15  -6   -2.03    2.74
   6  15  -6  148.76   10.95
   6  15   6  161.24   12.31
   6  15  -6  164.07    7.32
   6 -15  -6  169.12    6.52
   7 -15   6  101.01    5.99
   7  15   6   95.22   10.59
   7  15  -6   91.69    6.43
   7 -15  -6   93.79    5.58
   7  15  -6  101.58    9.99
   8  15  -6   -8.00    6.67
   8 -15  -6    0.36    3.67
   8 -15   6    4.74    3.87
   8  15  -6    2.96    4.22
   8  15   6    6.48    8.05
   9  15  -6    7.57    7.35
   9  15   6   10.17    8.64
   9 -15   6    3.73    4.19
   9 -15  -6   -3.11    3.78
   0  16  -6  255.03   12.20
   0  16   6  261.86   12.62
  -1  16   6   48.08    7.29
   1  16   6   27.56    7.17
  -1  16  -6   44.70    7.07
   1  16  -6   29.72    7.10
   2 -16  -6   -4.03    3.05
   2  16  -6    3.64    6.12
   2  16   6   -7.32    6.12
  -2  16   6   -3.44    5.34
  -2  16  -6    5.21    5.33
   3  16  -6   19.99    6.72
  -3  16   6   15.61    5.82
   3 -16  -6   20.67    4.33
   3  16   6    5.82    7.07
  -3  16  -6   15.22    5.69
   4 -16  -6   36.87    4.85
   4  16   6   31.89    8.28
   4  16  -6   22.18    7.08
  -4  16   6   36.37    6.21
   4 -16   6   31.83    5.62
   5  16  -6    0.75    6.54
   5  16   6    5.43    7.43
   5 -16   6    2.21    4.37
   5  16  -6    6.93    3.73
   6  16  -6   95.53    9.94
   6  16   6   96.76   10.75
   6  16  -6   93.19    6.32
   7 -16   6   16.64    4.08
   7  16  -6   15.93    7.50
   7  16   6    9.88    8.31
   8 -16   6    5.63    3.96
   8  16  -6   -0.73    7.25
   8  16   6   -0.67    8.09
   9 -16   6   53.95    5.57
   9 -16  -6   59.96    5.56
   9  16  -6   49.03    9.00
   9  16   6   43.18   10.08
   0  17  -6   -6.75    5.62
   0  17   6  -12.89    5.71
  -1  17  -6   16.14    6.34
   1  17  -6    9.09    6.39
   1  17   6   23.24    7.30
  -1  17   6   25.70    6.89
   2  17  -6   17.77    6.89
   2  17   6   25.64    7.49
  -2  17  -6   16.35    6.29
  -2  17   6   20.92    6.57
   3 -17  -6    7.54    4.08
   3  17  -6    1.74    6.50
  -3  17  -6   13.94    5.79
  -3  17   6    5.03    5.79
   3  17   6    3.26    7.12
   4 -17   6   15.90    5.22
   4  17  -6    3.04    6.71
   4  17   6   19.27    7.91
   4 -17  -6   18.64    4.40
  -4  17   6    5.47    5.68
   5 -17   6   44.36    5.98
   5 -17  -6   42.92    5.49
   5  17  -6   36.20    8.28
   5  17   6   42.70    9.17
   6  17   6   40.99    9.45
   6  17  -6   22.49    7.75
   7 -17   6   50.85    5.28
   7  17   6   55.46   10.00
   7  17  -6   50.29    8.99
   8  17  -6   29.38    8.39
   8 -17   6   21.13    4.64
   8  17   6   38.22    9.75
   0  18  -6  218.20   12.12
   0  18   6  212.62   12.37
  -1  18   6   36.46    7.46
   1  18   6   28.57    7.81
  -1  18  -6   33.54    7.25
   1  18  -6   32.09    7.42
  -2  18  -6  238.49   12.05
   2  18   6  211.74   13.08
  -2  18   6  232.36   12.38
   3  18   6   67.95    9.78
   3  18  -6   65.96    8.83
  -3  18   6   63.71    8.18
   4 -18   6   37.18    6.34
   4  18   6   36.87    8.69
   4  18  -6   34.92    7.96
   5 -18   6   23.50    5.63
   5  18   6   14.80    8.42
   5  18  -6   18.87    7.76
   5 -18  -6   23.19    5.13
   6  18  -6   15.97    8.07
   6 -18  -6   -0.77    4.56
   6  18   6    4.93    8.25
   7  18  -6    6.69    7.67
   7 -18   6    5.62    4.01
   7  18   6    1.55    8.35
   0  19   6   -3.25    6.40
   0  19  -6   -7.77    6.16
   1  19  -6   59.84    8.61
   1  19   6   52.05    8.85
  -1  19   6   62.94    8.84
  -1  19  -6   64.06    8.50
   2  19   6  -13.94    6.35
  -2  19  -6    0.95    6.07
  -2  19   6    0.97    6.55
   2  19  -6    0.57    6.58
   3  19   6   76.14   10.18
  -3  19   6   70.08    8.67
   3  19  -6   51.28    8.60
   4 -19   6   19.38    5.89
   4  19   6   17.37    8.28
   4  19  -6   18.89    7.64
   5  19  -6   13.38    7.94
   5  19   6   15.52    8.55
   6  19  -6   78.43   10.28
   6 -19  -6   77.12    6.99
   6  19   6   71.92   10.84
   0  20   6    6.81    7.37
   0  20  -6    2.33    6.81
   1  20   6    2.24    7.22
  -1  20   6   10.67    7.42
   1  20  -6   11.48    7.22
  -1  20  -6    7.91    6.89
  -2  20   6   86.12    9.68
   2  20   6   65.83    9.69
   2  20  -6   61.48    9.09
  -2  20  -6   77.82    8.98
   3  20   6  197.34   13.58
   3  20  -6  184.83   12.53
  -3  20   6  209.67   12.55
   4  20   6  151.38   12.76
   4 -20   6  176.14   10.41
   4  20  -6  150.58   11.97
   5  20   6    6.21    8.45
   5  20  -6    9.26    7.80
   0  21   6   -2.50    7.50
   0  21  -6   -0.56    6.83
   1  21  -6   32.36    8.52
  -1  21  -6   20.65    7.75
   1  21   6   35.44    8.91
  -1  21   6   41.16    8.95
  -2  21  -6   41.64    8.23
  -2  21   6   38.58    8.53
   2  21   6   38.11    9.05
   2  21  -6   42.36    8.62
   3  21   6    6.35    8.33
  -3  21   6    8.68    7.39
   3  21  -6   15.68    7.64
   0   0   7    4.28    1.67
   0   0  -7    2.57    1.25
   1   0   7    1.92    1.90
   1   0  -7    2.16    1.21
  -1   0   7    1.67    1.32
   1   0  -7    0.41    1.37
  -2   0   7   -0.48    1.21
   2   0  -7    1.53    1.66
   2   0   7   -1.40    2.40
   3   0  -7    3.86    1.91
   3   0   7   -1.52    1.61
   3   0   7    1.41    2.65
   4   0  -7    2.09    2.01
   4   0  -7   -4.70    1.54
   4   0   7   -0.43    1.77
   4   0   7   -4.30    2.66
   5   0  -7   -0.34    2.21
   5   0   7    0.47    1.91
   5   0  -7   -0.28    1.85
   5   0   7   -0.27    2.98
   6   0   7   -0.59    2.18
   6   0  -7    1.87    2.19
   6   0  -7    0.64    2.07
   6   0   7    2.25    3.19
   7   0   7    6.03    2.51
   7   0   7    2.95    3.68
   7   0  -7    0.63    2.75
   8   0   7   -2.67    4.07
   8   0   7    0.03    2.74
   8   0  -7   -0.60    2.93
   9   0  -7   -2.80    3.26
   9   0   7   -2.23    3.03
  10   0  -7    2.58    3.23
  10   0   7   -2.13    3.23
  11   0   7    1.42    3.66
  11   0  -7    4.02    3.96
  12   0   7    4.01    3.99
  12   0  -7   -1.40    4.13
  13   0  -7    0.72    4.45
  13   0   7   -3.11    4.21
   0  -1   7   -0.93    1.49
   0   1   7   -0.51    1.91
   0  -1  -7   -0.74    0.81
   0   1  -7   -0.57    1.06
   0  -1  -7    1.23    1.26
  -1   1   7 1931.67   31.17
   1   1   7 1951.07   31.78
   1  -1   7 1980.67   31.23
   1   1  -7 1926.89   31.58
   1  -1  -7 1937.45   30.35
   1   1  -7 1904.70   30.46
  -1  -1   7 1919.99   31.06
   1  -1  -7 1923.33   31.71
   2   1   7  122.58    5.73
  -2   1   7  137.14    3.42
   2  -1   7  151.92    4.90
   2  -1  -7  145.68    3.75
   2   1  -7  136.32    3.95
   2   1   7  140.24    3.47
   3   1  -7  794.40   13.73
   3  -1   7  787.12   13.63
   3   1   7  768.97   13.42
   3   1  -7  793.88   13.89
   3   1   7  793.17   15.42
   3  -1  -7  817.03   13.74
   3  -1   7  796.67   14.52
   4  -1   7  328.29    7.14
   4   1  -7  325.92    7.12
   4   1  -7  341.89    7.36
   4   1   7  322.97    9.08
   4   1   7  338.34    6.98
   4  -1   7  333.05    8.08
   4  -1  -7  326.92    7.20
   5  -1   7  200.52    6.81
   5  -1   7  192.84    5.32
   5  -1  -7  201.16    5.47
   5   1  -7  206.03    5.95
   5   1   7  194.70    7.55
   5   1  -7  209.99    5.79
   5   1   7  199.62    5.45
   6  -1   7  226.55    7.62
   6  -1   7  228.04    6.28
   6   1   7  213.83    8.26
   6  -1  -7  217.49    6.34
   6   1  -7  241.79    6.67
   6   1  -7  218.29    6.40
   6   1   7  215.44    6.09
   7   1   7    1.04    2.50
   7  -1  -7    2.42    2.75
   7   1  -7    2.50    2.46
   7  -1   7    3.15    3.47
   7   1   7    2.09    3.84
   7  -1   7    3.12    2.59
   8  -1  -7   50.47    4.25
   8   1  -7   60.28    4.33
   8  -1   7   61.10    4.50
   8  -1   7   61.73    5.40
   8   1   7   66.05    5.91
   8   1   7   61.48    4.42
   9  -1   7  187.17    6.90
   9  -1  -7  181.55    6.73
   9   1   7  199.48    6.90
   9   1  -7  194.60    7.13
  10  -1   7   11.35    3.72
  10  -1  -7    8.47    3.67
  10   1   7    6.09    3.13
  10   1  -7    7.05    3.77
  11   1  -7  140.66    6.91
  11  -1   7  121.20    6.47
  11  -1  -7  124.33    6.62
  11   1   7  131.94    6.56
  12  -1   7  233.77    8.73
  12  -1  -7  204.20    8.21
  12   1   7  230.41    8.64
  12   1  -7  215.09    8.39
  13  -1   7    5.66    4.52
  13   1   7    8.11    4.65
  13  -1  -7    3.85    4.48
  13   1  -7    5.14    4.66
   0   2  -7 2582.18   40.91
   0  -2   7 2557.22   41.79
   0   2   7 2667.46   42.40
   0  -2  -7 2661.65   42.63
   1  -2  -7 1669.87   27.61
   1   2   7 1671.95   28.22
   1  -2  -7 1680.89   26.19
  -1  -2  -7 1664.00   27.59
  -1   2   7 1639.64   27.38
   1   2  -7 1679.46   27.36
   1   2   7 1657.88   26.64
   1   2  -7 1649.12   26.47
   1  -2   7 1658.23   27.15
   2   2  -7    9.46    1.95
   2   2   7    8.90    3.30
   2  -2   7   14.62    2.19
   2   2  -7    5.56    2.53
   2  -2  -7   14.71    1.69
   2   2   7   11.42    1.36
  -2   2   7   10.07    1.94
   3  -2  -7    6.55    1.87
   3   2  -7    0.96    2.62
   3   2   7    4.28    1.65
   3   2  -7    5.49    1.77
   3   2   7    4.67    3.40
   3  -2   7    5.51    2.23
   4   2   7  323.48    6.79
   4  -2  -7  337.30    7.04
   4   2  -7  326.76    7.16
   4   2  -7  335.73    8.05
   4  -2   7  323.06    7.63
   4  -2   7  327.11    7.21
   4   2   7  317.14    9.46
   5   2  -7    9.07    2.46
   5  -2   7    5.51    1.97
   5  -2  -7    7.78    2.38
   5   2   7    6.86    2.11
   5  -2   7    7.09    2.73
   5   2   7    6.38    3.75
   5   2  -7    8.11    2.89
   6  -2  -7 2409.07   39.53
   6   2  -7 2445.68   40.33
   6   2  -7 2413.51   39.62
   6  -2   7 2459.93   40.59
   6  -2   7 2415.04   39.59
   6   2   7 2375.69   39.26
   6   2   7 2391.26   42.06
   7   2  -7  781.61   15.15
   7  -2  -7  770.99   15.00
   7  -2   7  761.26   15.99
   7   2   7  779.50   17.53
   7  -2   7  761.99   14.92
   7   2   7  747.11   14.62
   7   2  -7  757.95   15.38
   8  -2   7  184.25    6.49
   8  -2   7  189.29    7.83
   8   2   7  177.39    6.22
   8   2  -7  188.28    6.72
   8  -2  -7  187.79    6.62
   8   2   7  173.65    8.87
   9  -2  -7   57.92    4.66
   9   2   7   60.12    4.41
   9   2   7   55.13    6.52
   9  -2   7   60.86    4.52
   9   2  -7   51.02    4.63
  10  -2   7   53.18    4.77
  10   2   7   55.48    4.60
  10   2  -7   45.35    4.71
  10  -2  -7   49.26    4.45
  11  -2   7   62.38    5.31
  11  -2  -7   59.35    5.31
  11   2  -7   61.06    5.52
  11   2   7   61.18    5.18
  12   2  -7   92.81    6.47
  12   2   7   87.37    6.22
  12  -2   7   80.97    5.76
  12  -2  -7   71.89    5.66
  13   2   7  103.51    6.94
  13  -2  -7  100.79    6.97
  13  -2   7   96.17    6.84
  13   2  -7   89.19    6.83
   0  -3   7   -3.79    2.36
   0  -3  -7   -3.36    1.61
   0   3   7   -6.07    2.95
   1   3  -7  427.69    9.46
   1  -3  -7  447.19    7.58
   1  -3   7  443.93    9.00
  -1  -3  -7  443.60    8.55
   1   3  -7  430.50    8.26
  -1   3   7  440.31    9.49
   1   3   7  427.14   10.41
   1  -3  -7  434.85    8.56
   2  -3  -7   -0.11    1.41
   2   3  -7   -2.00    2.67
   2   3   7    0.20    1.16
   2  -3   7    1.88    1.99
   2   3  -7    0.20    1.09
   2   3   7    3.53    3.46
  -2   3   7   -1.44    2.18
   2   3  -7    2.04    1.65
   3   3  -7   46.10    3.22
   3   3   7   50.31    4.71
   3  -3  -7   55.35    2.98
   3   3  -7   57.34    3.99
   3   3   7   48.81    2.58
   3  -3   7   52.83    3.44
   4  -3   7   48.58    3.70
   4   3   7   55.78    3.06
   4  -3   7   46.52    3.38
   4   3  -7   44.64    3.40
   4  -3  -7   52.93    3.35
   4   3  -7   55.72    4.10
   4   3   7   54.02    5.01
   5   3   7  313.61   10.26
   5   3  -7  333.92    8.93
   5   3  -7  326.39    7.65
   5   3   7  322.98    7.20
   5  -3  -7  316.67    7.44
   5  -3   7  322.38    7.61
   5  -3   7  314.23    7.80
   6   3  -7   12.13    3.51
   6   3  -7    6.65    2.42
   6  -3   7    4.87    2.74
   6   3   7    6.27    2.51
   6  -3  -7    6.33    2.59
   6   3   7    5.05    4.19
   6  -3   7    5.91    2.45
   7   3   7  152.85    8.50
   7   3  -7  161.97    7.16
   7   3   7  160.05    5.49
   7  -3   7  162.64    6.59
   7  -3  -7  161.26    5.83
   7   3  -7  155.31    6.00
   7  -3   7  163.25    5.85
   8  -3   7  178.67    6.46
   8   3   7  173.92    6.09
   8   3   7  161.75    8.91
   8  -3  -7  172.11    6.40
   8   3  -7  171.13    6.51
   8  -3   7  168.48    7.50
   9   3   7   63.02    4.57
   9  -3   7   60.14    4.37
   9   3   7   74.95    7.05
   9  -3  -7   60.08    4.71
   9   3  -7   60.83    4.54
  10   3   7   18.74    3.88
  10  -3  -7   22.33    4.10
  10  -3   7   23.79    4.10
  10   3  -7   24.33    4.31
  11  -3   7  315.43    9.67
  11   3  -7  317.69   10.06
  11   3   7  332.52    9.75
  11  -3  -7  310.92    9.88
  12   3  -7   19.06    4.81
  12  -3   7    9.83    3.93
  12  -3  -7    3.17    3.83
  12   3   7   13.12    4.45
  13   3  -7   63.90    6.22
  13   3   7   56.28    5.76
  13  -3   7   58.66    5.98
  13  -3  -7   51.91    5.52
   0   4   7 1825.49   31.72
   0   4  -7 1846.46   31.26
   0  -4  -7 1890.52   30.90
   1   4  -7 1326.68   22.12
   1  -4  -7 1385.06   21.46
   1   4   7 1342.57   21.61
   1  -4  -7 1350.78   23.00
  -1   4   7 1348.77   23.60
   1  -4   7 1361.33   23.26
  -1  -4  -7 1366.62   22.89
   1   4  -7 1336.96   23.74
   1   4   7 1338.23   24.60
   2  -4   7  107.40    4.53
   2   4   7  112.94    6.82
   2   4   7  108.56    2.77
   2   4  -7  108.48    3.92
   2   4  -7  106.01    5.93
   2  -4  -7  118.63    3.36
  -2   4   7  100.99    5.13
   3  -4   7  261.58    6.54
   3   4  -7  278.15    8.19
   3   4  -7  259.20    6.26
   3   4   7  269.21    5.48
   3  -4  -7  273.38    5.87
   3   4   7  251.60    9.27
  -3   4   7  271.37    6.25
   4   4   7  222.40    8.82
   4   4  -7  224.59    5.96
   4   4  -7  227.30    7.89
   4   4   7  235.93    5.35
   4  -4  -7  223.52    5.71
   4  -4   7  227.70    6.01
   5   4  -7   57.75    3.86
   5   4  -7   57.48    4.69
   5   4   7   56.33    3.39
   5   4   7   64.62    5.69
   5  -4   7   52.05    3.89
   5  -4  -7   55.37    3.62
   5  -4   7   57.74    3.50
   6  -4   7  154.44    5.65
   6   4  -7  153.55    7.24
   6  -4   7  163.38    5.57
   6   4   7  155.74    5.04
   6   4   7  164.33    8.52
   6  -4  -7  160.46    5.51
   6   4  -7  160.50    5.63
   7   4  -7   34.15    4.78
   7  -4   7   44.13    3.97
   7  -4  -7   34.82    3.49
   7   4   7   41.06    5.78
   7   4   7   38.55    3.33
   7   4  -7   29.83    3.54
   7  -4   7   41.51    3.61
   8   4   7  523.16   11.53
   8  -4  -7  519.46   11.85
   8   4   7  539.72   15.12
   8  -4   7  524.03   11.92
   8   4  -7  511.98   11.92
   9   4   7   51.22    6.69
   9   4  -7   42.21    4.54
   9   4   7   46.04    4.12
   9  -4   7   40.70    4.24
   9  -4  -7   45.27    4.30
  10  -4   7   13.04    3.90
  10   4  -7   21.25    4.24
  10   4   7   14.96    3.83
  10  -4  -7    7.70    3.39
  11  -4   7   25.31    4.09
  11  -4  -7   22.12    4.47
  11   4  -7   30.09    4.84
  11   4   7   40.01    4.68
  12  -4   7   -0.20    3.99
  12  -4  -7    0.92    4.29
  12   4  -7   13.38    4.70
  12   4   7    8.23    4.33
  13  -4  -7   34.02    5.52
  13   4   7   38.14    5.41
  13   4  -7   50.63    6.00
  13  -4   7   33.57    5.32
   0  -5  -7   -2.86    1.80
   0   5  -7   -2.46    2.90
   0   5   7    5.18    3.67
   1  -5  -7   -0.78    1.31
   1   5   7    0.36    0.96
   1  -5   7    2.70    2.68
  -1   5   7    1.16    3.28
   1   5  -7   -0.09    1.79
   1   5  -7   -3.92    3.09
  -1  -5  -7    1.68    1.84
   1   5   7   -2.68    3.61
   1  -5  -7    0.50    1.73
   2  -5  -7   94.72    3.14
  -2  -5  -7   84.75    3.56
   2   5   7   96.77    6.86
   2   5  -7   94.75    6.18
  -2   5   7   94.16    5.46
   2  -5   7   86.03    4.70
   2   5   7   82.82    2.56
   2   5  -7   83.81    3.72
   3   5   7  139.35    7.88
  -3   5   7  133.36    5.18
   3  -5  -7  146.27    4.16
   3   5   7  146.88    3.72
   3   5  -7  139.56    4.60
   3  -5   7  139.71    4.99
   3   5  -7  154.50    6.98
   4  -5  -7    6.18    2.06
   4   5   7   14.35    4.56
   4   5  -7    7.77    2.33
   4   5  -7    6.94    3.79
   4  -5   7   16.28    2.38
   4   5   7   11.19    1.87
  -4   5   7   10.53    1.90
   5  -5  -7  137.99    4.82
   5  -5  -7  140.14    3.39
   5   5   7  143.96    4.35
   5  -5   7  144.66    5.20
   5   5   7  126.76    8.14
   5  -5   7  132.49    4.89
   5   5  -7  141.63    5.09
   5   5  -7  154.34    7.42
   6  -5   7    1.94    2.49
   6   5   7    0.90    4.51
   6   5   7   -2.84    2.07
   6   5  -7    3.30    2.74
   6  -5  -7    3.46    2.43
   6  -5   7   -1.05    2.33
   6   5  -7   -2.47    3.68
   7  -5  -7  160.86    5.97
   7  -5   7  165.18    6.09
   7  -5   7  161.96    6.31
   7   5   7  175.27    5.65
   7   5   7  170.66    9.43
   7   5  -7  176.28    6.01
   7   5  -7  165.56    8.36
   8   5  -7  134.83    6.11
   8  -5   7  140.86    5.77
   8  -5  -7  128.64    5.87
   8   5   7  153.02    5.89
   8   5   7  136.93    9.21
   9  -5  -7   -2.07    3.27
   9  -5   7   -1.12    2.85
   9   5  -7    4.44    3.23
   9   5   7    1.81    3.39
   9   5   7   -1.32    5.63
  10   5  -7   64.88    5.32
  10  -5  -7   62.73    4.71
  10   5   7   52.07    4.61
  10  -5   7   51.43    4.86
  11  -5  -7   26.81    4.64
  11  -5   7   25.10    4.47
  11   5  -7   32.27    4.92
  11   5   7   27.74    4.73
  12  -5   7  266.02    9.64
  12   5   7  274.99    9.40
  12   5  -7  270.87    9.75
  12  -5  -7  252.06    9.16
  13   5   7    3.52    4.62
  13   5  -7    0.78    4.73
  13  -5   7    2.63    4.46
  13  -5  -7   -0.81    4.60
   0   6  -7   30.73    3.95
   0  -6  -7   22.47    2.38
   0   6   7   31.05    4.41
   1   6  -7  513.32   10.03
   1   6   7  546.48   13.40
  -1  -6  -7  528.02   10.15
  -1   6  -7  517.88   11.86
   1  -6  -7  520.35   10.34
  -1   6   7  521.91   12.31
  -2  -6  -7 1500.13   25.30
   2   6   7 1433.90   27.98
   2  -6   7 1494.59   26.03
   2   6   7 1492.76   23.67
   2  -6  -7 1507.81   24.03
   2   6  -7 1465.81   27.26
   2   6  -7 1504.83   24.75
  -2   6   7 1485.10   26.31
   3  -6  -7  764.47   13.30
   3   6   7  738.83   12.75
   3   6   7  759.72   17.43
  -3   6   7  761.93   14.63
   3  -6   7  747.96   14.42
   3   6  -7  725.99   13.61
   3   6  -7  748.17   16.37
   4  -6  -7  180.11    5.26
   4  -6   7  189.11    5.73
   4   6  -7  180.14    8.12
   4   6   7  180.78    4.73
   4   6  -7  179.95    5.50
  -4   6   7  178.07    5.62
   4   6   7  180.42    8.90
   5   6   7   45.08    5.83
   5   6  -7   43.84    5.06
   5  -6  -7   37.02    2.96
   5  -6   7   45.21    3.18
   5  -6  -7   38.65    2.38
   5   6  -7   38.30    3.32
   5   6   7   40.46    2.78
   6  -6   7    9.73    2.56
   6  -6   7    9.67    2.50
   6   6  -7    7.75    2.77
   6   6  -7    4.46    4.28
   6   6   7   14.94    5.31
   6  -6  -7   11.62    2.68
   6   6   7   10.93    2.55
   7  -6  -7 1045.24   19.51
   7   6  -7 1026.17   19.66
   7   6  -7 1038.83   22.10
   7   6   7 1073.37   23.92
   7  -6   7 1065.69   19.59
   7   6   7 1077.15   19.16
   7  -6   7 1049.13   19.83
   8  -6   7    7.25    3.20
   8   6   7    1.39    5.59
   8   6  -7   13.56    3.65
   8   6   7   15.61    3.41
   8  -6  -7   12.80    3.34
   8   6  -7    9.22    4.91
   9  -6  -7    6.48    3.41
   9   6  -7   -1.56    3.50
   9  -6   7    5.13    3.42
   9   6   7   -2.81    3.08
   9   6   7    4.94    6.02
  10   6   7  174.66    6.98
  10   6  -7  176.93    7.52
  10  -6   7  183.53    7.39
  10  -6  -7  182.13    7.33
  11  -6   7    1.19    3.81
  11  -6  -7   -0.15    3.80
  11   6  -7    7.36    4.40
  11   6   7    0.17    3.71
  12   6  -7   19.37    4.91
  12   6   7   13.12    4.56
  12  -6  -7    2.16    4.27
  12  -6   7   13.87    4.50
  13   6   7  191.49    8.63
  13  -6   7  195.90    8.86
  13  -6  -7  201.81    8.99
  13   6  -7  197.61    9.20
   0  -7  -7    1.94    1.93
   0   7   7   -0.03    3.80
   0   7  -7    3.11    3.48
  -1   7  -7   70.54    4.74
   1   7  -7   75.69    3.68
  -1  -7  -7   73.77    3.50
   1  -7  -7   72.08    3.85
   1   7  -7   73.49    5.30
   1   7   7   71.78    5.87
  -1   7   7   75.47    5.29
   2   7   7   30.19    5.10
  -2  -7  -7   40.87    2.71
   2   7   7   37.29    2.30
   2   7  -7   29.57    4.57
   2  -7  -7   40.02    2.67
  -2   7   7   42.24    4.30
   2  -7   7   44.79    3.97
   2   7  -7   40.05    2.92
   3   7  -7    9.39    2.45
   3  -7  -7    9.89    2.04
   3   7  -7   14.11    4.24
   3   7   7   12.28    4.78
  -3   7   7   11.47    3.08
   3  -7   7   10.52    2.83
   3   7   7    7.86    1.66
   4  -7   7  663.00   13.36
   4   7  -7  655.47   15.93
   4  -7  -7  687.66   12.55
   4   7   7  667.08   12.04
   4   7  -7  685.76   13.03
   4   7   7  657.57   16.97
  -4   7   7  676.38   13.35
   5   7   7   23.68    2.50
   5   7  -7   25.76    4.91
   5   7  -7   23.44    3.03
   5   7   7   26.94    5.71
   5  -7  -7   21.62    2.83
   5  -7   7   23.86    2.85
   6   7   7    4.94    5.39
   6   7   7   14.16    2.63
   6   7  -7   10.22    4.68
   6   7  -7   12.51    3.10
   6  -7   7   16.26    2.76
   6  -7  -7    9.92    2.74
   6  -7   7   12.38    2.66
   7  -7  -7  341.57    8.67
   7   7   7  320.85    8.14
   7   7   7  326.19   12.84
   7  -7   7  323.85    8.60
   7  -7   7  330.38    8.88
   7   7  -7  325.89    8.81
   7   7  -7  333.40   11.48
   8   7   7    4.78    6.03
   8   7  -7    5.68    3.41
   8   7   7   -0.38    2.85
   8  -7  -7    6.14    2.91
   8   7  -7    1.42    5.11
   8  -7   7    3.41    3.20
   9  -7   7    2.96    3.39
   9  -7  -7    7.48    3.58
   9   7  -7   13.44    4.04
   9   7   7    7.22    3.30
   9   7   7   14.89    6.41
  10  -7   7    3.82    3.68
  10   7  -7    4.14    3.58
  10  -7  -7    1.16    3.51
  10   7   7    1.64    3.78
  11  -7  -7  112.01    6.50
  11  -7   7  115.67    6.67
  11   7   7  123.80    6.57
  11   7  -7  123.85    7.17
  12   7   7  106.23    6.72
  12  -7   7  108.81    6.96
  12  -7  -7  112.71    6.84
  12   7  -7  105.40    7.26
   0   8  -7    3.35    3.71
   0  -8  -7    1.28    2.00
   0   8   7    5.62    4.17
  -1   8   7  306.60   10.05
   1   8   7  299.68   10.56
   1  -8  -7  309.52    7.42
  -1  -8  -7  300.52    7.12
   1   8  -7  298.58   10.04
  -1   8  -7  309.98    9.48
  -1  -8   7  304.88    5.71
   2   8   7  939.90   15.55
  -2  -8  -7  918.34   16.71
   2   8  -7  922.80   16.71
  -2   8   7  957.82   19.11
   2   8  -7  927.87   19.95
   3   8   7   15.95    4.99
   3   8  -7   10.59    2.49
   3  -8  -7    9.16    2.10
   3  -8   7    9.67    3.11
   3   8   7    9.12    1.76
  -3   8   7    7.27    3.32
   3   8  -7    7.30    4.40
   4  -8   7  129.97    5.50
  -4   8   7  121.53    5.81
   4  -8  -7  123.98    4.41
   4   8   7  126.04    4.07
   4   8   7  113.30    8.58
   4   8  -7  135.36    7.92
   4   8  -7  124.03    4.94
   5   8  -7   55.59    4.09
   5   8   7   57.76    6.80
   5  -8   7   59.80    3.81
   5  -8  -7   50.07    3.48
   5   8  -7   48.41    5.90
   5   8   7   46.78    3.21
   6  -8   7  194.82    6.38
   6  -8   7  196.29    6.36
   6   8  -7  190.25    6.43
   6   8  -7  191.85    9.55
   6   8   7  202.32   10.47
   6  -8  -7  190.56    6.10
   6   8   7  200.48    5.83
   7  -8   7  390.12    9.91
   7  -8   7  369.20    9.40
   7   8  -7  376.85    9.77
   7  -8  -7  385.99    9.45
   7   8  -7  371.23   12.77
   7   8   7  397.78    9.06
   7   8   7  397.66   14.18
   8   8   7  451.77   10.59
   8  -8  -7  461.08   11.05
   8   8  -7  453.64   14.33
   8  -8   7  461.14   11.20
   8   8   7  456.08   15.65
   8   8  -7  440.80   11.24
   9   8   7    9.56    3.40
   9   8   7    2.58    6.22
   9  -8  -7    4.04    3.40
   9   8  -7   -1.74    3.61
   9  -8   7    3.88    3.53
  10   8   7    3.86    6.64
  10  -8  -7   -4.60    3.41
  10   8   7    4.61    3.58
  10   8  -7    2.08    4.11
  10  -8   7   -2.26    3.55
  11  -8   7   -1.91    3.46
  11  -8  -7    1.73    3.87
  11   8  -7   -1.98    4.35
  11   8   7   -0.02    4.22
  12   8  -7    6.28    4.86
  12  -8  -7   -2.89    3.97
  12  -8   7   -0.22    3.74
  12   8   7   10.17    4.87
   0   9  -7   -0.02    3.75
   0  -9  -7   -0.82    2.02
   0   9   7   -3.52    4.09
  -1   9  -7    3.00    3.65
  -1  -9   7   -0.77    1.19
   1   9  -7   -3.11    3.90
  -1   9   7    4.73    4.01
  -1  -9  -7    2.79    2.15
   1  -9  -7    0.62    2.20
   1   9   7   -1.04    4.42
  -2   9   7   16.36    4.10
   2   9   7   10.61    1.69
   2   9  -7   10.36    2.49
   2   9   7   11.49    5.10
   2  -9  -7    8.89    2.49
   2   9  -7    9.41    4.56
  -2   9  -7    9.39    3.67
  -2  -9  -7   10.76    2.32
   3   9  -7   50.47    3.79
   3  -9  -7   43.71    3.25
   3   9  -7   51.52    5.82
   3  -9   7   57.77    4.49
   3   9   7   40.45    6.15
   3   9   7   51.57    3.04
  -3   9   7   55.47    4.76
   4  -9  -7   97.85    4.38
   4  -9   7  116.13    5.66
   4   9  -7  105.52    5.00
   4   9   7  108.04    7.99
  -4   9   7  111.05    6.08
   4   9   7  104.62    3.96
   4   9  -7   98.25    7.15
   5   9   7  108.50    4.14
   5  -9   7  102.25    5.21
   5   9  -7  108.05    8.32
   5   9  -7  106.22    4.99
   5  -9  -7  101.08    4.46
   5   9   7  104.29    8.27
  -5   9   7   97.59    5.34
   6  -9   7  255.68    7.60
   6   9  -7  246.10    7.49
   6   9   7  235.22   11.56
   6   9  -7  251.55   10.90
   6   9   7  245.98    6.64
   6  -9  -7  251.55    7.24
   6  -9   7  245.94    7.45
   7   9   7  156.30    5.69
   7   9  -7  156.53    9.72
   7  -9  -7  148.17    5.94
   7   9  -7  152.67    6.36
   7   9   7  156.94   10.50
   7  -9   7  164.36    6.44
   8   9   7   93.43    5.13
   8  -9   7   78.49    5.35
   8   9  -7   96.04    8.10
   8  -9  -7   83.00    5.11
   8   9   7   92.93    9.05
   8   9  -7   84.31    5.50
   9  -9   7   26.90    3.88
   9   9   7   36.95    4.26
   9   9   7   29.97    7.62
   9   9  -7   18.59    4.50
   9  -9  -7   28.42    4.09
  10   9  -7   85.85    6.36
  10   9   7   99.81    5.88
  10  -9   7   92.49    5.84
  10  -9  -7   96.24    6.04
  10   9   7  101.64    9.94
  11   9  -7   35.08    5.41
  11  -9   7   24.25    4.83
  11   9   7   32.86    4.74
  11  -9  -7   21.40    4.68
  12  -9   7   35.46    5.31
  12   9  -7   39.90    5.82
  12  -9  -7   38.62    5.38
   0  10  -7   44.93    5.35
   0 -10  -7   53.75    3.63
   0  10   7   55.03    6.00
  -1  10   7    8.16    4.52
   1  10  -7    5.80    4.33
   1  10   7   16.07    5.10
  -1 -10   7    6.35    1.48
  -1 -10  -7   14.37    2.55
  -1  10  -7    8.79    4.06
   1 -10  -7    9.01    2.51
  -2  10   7  158.64    8.08
   2  10  -7  178.34    5.62
  -2  10  -7  166.05    7.79
   2  10   7  168.37    9.73
   2  10  -7  173.51    8.95
  -2 -10  -7  177.12    5.37
   2 -10  -7  162.25    5.93
   3  10  -7  532.87   11.21
  -3  10   7  545.67   13.45
   3  10   7  529.36   15.78
   3  10  -7  522.63   14.92
   3  10   7  522.67   10.08
   3 -10   7  541.39   13.05
   3 -10  -7  536.08   10.56
  -4  10   7   -2.93    3.30
   4  10   7   -7.05    5.00
   4 -10  -7    0.44    2.29
   4  10   7    1.05    1.90
   4  10  -7   -0.05    4.82
   4 -10   7    4.09    3.18
   4  10  -7    4.97    2.91
   5 -10  -7   99.56    4.72
   5  10  -7   98.73    7.73
  -5  10   7   98.95    5.78
   5 -10   7   87.69    5.40
   5  10   7   92.65    4.06
   5  10  -7  102.30    5.04
   5  10   7   99.61    8.41
   6  10   7   15.21    2.95
   6 -10   7   12.41    3.10
   6 -10  -7   12.63    3.00
   6  10  -7   20.39    3.60
   6 -10   7   13.75    3.29
   6  10  -7   16.43    5.81
   6  10   7   11.34    6.30
   7  10  -7  174.52    6.79
   7  10   7  151.59   10.80
   7 -10   7  172.88    6.76
   7  10  -7  164.27   10.19
   7 -10  -7  164.38    6.25
   7  10   7  171.75    5.96
   8  10   7   92.06    9.28
   8  10   7   87.27    5.15
   8  10  -7   96.51    8.43
   8  10  -7   87.65    5.69
   8 -10   7   91.55    5.63
   8 -10  -7   85.75    5.18
   9  10   7   27.22    7.81
   9 -10   7   29.36    4.33
   9  10   7   34.56    4.25
   9 -10  -7   19.71    4.03
  10 -10   7    1.28    3.82
  10 -10  -7    2.52    3.88
  10  10  -7    7.31    4.26
  10  10   7    2.13    7.33
  11 -10  -7   -1.36    3.91
  11 -10   7   -5.78    3.95
  11  10  -7   12.81    4.96
  12 -10  -7   25.92    5.15
  12 -10   7   24.65    5.19
  12  10  -7   28.20    5.79
   0  11  -7   -2.08    4.16
   0 -11  -7   -0.67    2.45
   0  11   7    7.62    4.85
  -1  11   7   -1.69    4.40
   1 -11  -7    1.57    2.48
  -1  11  -7    0.81    4.08
   1  11   7   -1.16    4.84
   1  11  -7   -3.16    4.32
  -1 -11  -7    1.30    2.40
  -2  11  -7  217.91    9.16
   2 -11  -7  216.08    6.84
   2  11  -7  211.05    9.99
   2  11   7  214.39   10.87
  -2 -11  -7  221.53    6.20
  -2  11   7  228.51    9.51
   3 -11   7  163.60    7.75
   3  11  -7  153.43    9.15
  -3  11   7  169.67    8.01
   3 -11  -7  169.71    5.26
   3  11   7  180.80    4.89
   3  11   7  177.60   10.29
   3  11  -7  172.47    5.92
   4 -11   7  348.96   10.21
   4  11   7  339.21   13.52
   4  11  -7  360.85    8.95
  -4  11   7  360.65   10.76
   4  11   7  352.84    7.75
   4 -11  -7  350.69    8.30
   4  11  -7  352.03   12.75
  -5  11   7   40.88    4.36
   5  11   7   36.42    3.15
   5 -11   7   33.85    4.07
   5 -11  -7   32.34    3.43
   5  11  -7   23.64    6.21
   5  11  -7   28.65    3.67
   5  11   7   18.83    6.63
   6  11   7   78.42    4.45
   6 -11   7   74.14    4.87
   6  11  -7   78.42    7.80
   6  11  -7   68.67    4.98
   6 -11  -7   70.46    4.51
   6  11   7   81.69    8.66
   7  11   7    2.08    6.65
   7 -11   7    2.10    3.25
   7  11  -7    8.51    3.52
   7  11  -7    2.08    6.03
   7 -11  -7    4.47    3.06
   8  11   7    7.65    6.99
   8 -11   7    8.54    3.61
   8  11  -7    3.97    3.78
   8  11  -7   12.53    6.46
   8 -11  -7    0.37    3.25
   9 -11   7  130.91    6.49
   9  11   7  142.27   11.10
   9 -11  -7  148.64    6.68
   9  11  -7  138.15    7.06
   9  11  -7  136.47   10.00
  10 -11   7   90.89    6.01
  10 -11  -7   96.58    6.22
  10  11   7  105.08   10.66
  10  11  -7   91.34    6.60
  11 -11  -7   71.15    5.77
  11 -11   7   59.62    5.88
  11  11  -7   67.98    6.35
   0  12   7 1623.26   32.77
   0  12  -7 1628.55   32.02
   0 -12  -7 1605.48   28.56
  -1 -12  -7  166.65    5.76
   1  12   7  172.28   10.05
  -1  12  -7  164.29    8.80
  -1  12   7  183.38    9.57
   1  12  -7  167.68    9.36
   1 -12  -7  172.03    6.02
   2  12  -7   31.64    5.98
  -2  12   7   36.56    5.63
  -2 -12  -7   35.22    3.25
   2  12   7   37.94    6.74
   2 -12  -7   34.05    3.64
  -2  12  -7   33.91    5.24
   3  12  -7    7.98    5.47
   3  12   7   14.32    6.06
   3 -12  -7   11.09    3.46
  -3 -12  -7   16.42    2.75
   3  12  -7   12.99    3.13
  -3  12   7    8.74    4.37
  -4  12   7   15.28    4.40
   4  12   7   19.18    6.57
   4  12  -7   11.56    5.75
   4 -12   7    7.89    3.87
   4  12  -7   18.43    3.36
   4 -12  -7   13.17    2.68
   5  12  -7  104.27    5.44
   5 -12  -7  108.65    4.94
   5  12   7  102.70    9.26
   5  12  -7  105.81    8.61
   5 -12   7   95.14    6.20
   6 -12   7   89.43    5.88
   6  12  -7  117.60    9.07
   6 -12  -7  101.57    5.11
   6  12  -7  120.75    5.84
   6  12   7  115.60    9.88
   7  12  -7  334.79    9.59
   7 -12  -7  340.97    9.16
   7  12  -7  318.34   13.48
   7 -12   7  328.57    9.60
   7  12   7  347.46   15.05
   8  12  -7   -4.75    6.04
   8 -12  -7   -2.13    3.24
   8  12   7    7.56    7.41
   8 -12   7    8.34    3.70
   8  12  -7   11.07    4.10
   9 -12  -7    0.97    3.55
   9  12   7   -2.60    7.35
   9 -12   7    2.84    3.89
   9  12  -7    6.09    6.50
   9  12  -7    1.69    4.03
  10  12  -7    9.09    4.99
  10  12   7   -1.76    7.66
  10 -12  -7   -0.83    3.81
  10 -12   7    4.45    4.11
  11  12  -7   72.31    6.67
  11 -12   7   66.40    5.72
  11 -12  -7   52.04    5.66
   0  13  -7   -5.06    4.63
   0 -13  -7    2.84    2.85
   0  13   7    5.62    5.42
   1  13  -7   89.82    7.61
   1  13   7   89.66    8.13
  -1 -13  -7   75.57    4.56
  -1  13  -7   73.90    6.84
  -1  13   7   76.81    7.30
   1 -13  -7   77.25    4.98
   2  13   7  162.75   10.53
  -2  13  -7  149.14    8.77
  -2 -13  -7  151.39    5.52
  -2  13   7  140.22    8.76
   2 -13  -7  152.52    6.14
   2  13  -7  145.77    9.58
   3  13   7    7.80    6.17
   3  13  -7    4.32    5.51
  -3  13   7   -5.09    4.17
   3  13  -7    0.03    2.91
   3 -13  -7    0.30    3.29
   4 -13  -7   27.02    3.30
   4  13   7   32.14    7.38
   4  13  -7   25.62    3.74
   4 -13   7   31.82    4.95
  -4  13   7   28.81    5.07
   4  13  -7   28.66    6.57
   5 -13   7   85.97    6.25
   5  13  -7   92.75    8.55
   5  13   7   99.08    9.64
   5  13  -7   96.57    5.42
   5 -13  -7   99.36    5.06
   6 -13   7   77.60    5.44
   6  13  -7   66.20    8.06
   6  13   7   66.05    9.05
   6 -13  -7   66.76    4.67
   6  13  -7   80.34    5.36
   7  13  -7   -0.53    6.22
   7  13   7   14.51    7.52
   7  13  -7   20.24    4.20
   7 -13   7   12.60    3.72
   7 -13  -7    9.98    3.39
   8  13  -7   83.14    6.03
   8 -13  -7   69.05    5.20
   8  13   7   84.39   10.12
   8 -13   7   77.46    5.55
   8  13  -7   64.59    8.62
   9  13  -7  112.10    7.15
   9  13  -7   81.17    9.21
   9 -13  -7   87.80    5.87
   9 -13   7   80.08    6.09
   9  13   7  108.89   11.00
  10  13   7    4.81    8.20
  10  13  -7   14.28    4.94
  10 -13   7    4.23    4.10
  10 -13  -7    1.90    4.00
   0  14  -7  400.64   13.85
   0  14   7  397.33   14.36
   0 -14  -7  392.25    9.82
  -1 -14  -7   10.55    3.15
   1  14   7   14.07    6.45
   1  14  -7    9.87    5.64
  -1  14  -7    3.52    5.05
   1 -14  -7    6.21    3.06
  -1  14   7   13.09    5.67
   2  14  -7  178.48   10.38
   2 -14  -7  174.88    6.87
   2  14   7  165.71   11.16
  -2  14  -7  168.95    9.51
  -2  14   7  170.12    9.56
   3 -14  -7   21.15    3.92
   3  14   7   19.44    7.00
   3  14  -7   22.97    6.51
  -3  14   7   20.75    5.41
   4  14  -7   86.56    8.56
   4 -14   7   71.03    6.09
  -4  14   7   85.15    6.84
   4 -14  -7   60.98    4.41
   4  14  -7   72.48    5.31
   4  14   7   72.84    8.85
   5 -14   7  208.52    8.73
   5  14   7  225.55   13.02
   5 -14  -7  227.82    6.96
   5  14  -7  215.22   11.69
   5  14  -7  212.55    7.51
   6 -14   7  139.23    7.15
   6  14  -7  131.27   10.18
   6 -14  -7  143.81    6.17
   6  14   7  134.15   11.13
   6  14  -7  144.68    6.57
   7  14   7   55.61    9.34
   7 -14  -7   64.28    4.87
   7 -14   7   72.74    5.22
   7  14  -7   61.73    5.23
   7  14  -7   66.34    8.69
   8  14  -7   26.93    7.60
   8  14  -7   17.16    4.53
   8 -14  -7   13.51    3.79
   8  14   7   31.39    8.83
   8 -14   7   17.11    4.14
   9 -14   7    0.09    3.78
   9 -14  -7    0.51    3.89
   9  14   7   -5.53    7.68
   9  14  -7   -2.59    4.45
   9  14  -7    7.17    7.19
  10  14  -7  141.81    8.31
  10 -14   7  143.93    7.58
  10  14   7  147.94   12.76
  10 -14  -7  146.40    7.41
   0  15  -7    4.29    5.58
   0  15   7    4.29    5.85
   1 -15  -7   70.42    4.81
  -1  15   7   67.09    7.64
  -1  15  -7   68.65    7.34
   1  15  -7   64.81    7.75
   1  15   7   50.21    7.90
   2 -15  -7  115.45    5.93
  -2  15   7  140.62    9.32
   2  15  -7  122.13    9.18
   2  15   7  139.05   10.34
  -2  15  -7  133.82    9.09
   3  15   7    8.45    6.80
   3  15  -7   14.62    6.54
  -3  15   7    8.98    5.28
   3 -15  -7    1.44    3.44
   4  15  -7    2.52    3.44
  -4  15   7    3.55    4.81
   4  15   7   -1.46    6.79
   4  15  -7    0.55    6.20
   4 -15   7    8.73    4.51
   4 -15  -7    3.56    3.88
   5  15  -7   34.35    7.41
   5  15  -7   21.75    4.34
   5 -15   7   24.57    4.86
   5  15   7   22.80    7.89
   6  15  -7    0.21    3.76
   6  15  -7    7.33    6.72
   6 -15  -7    1.79    3.22
   6  15   7   -2.83    7.33
   7  15  -7   79.21    9.07
   7 -15   7   64.17    5.26
   7  15  -7   70.08    5.87
   7  15   7   63.78    9.87
   7 -15  -7   68.99    5.09
   8  15  -7    0.21    6.67
   8 -15  -7    3.73    3.60
   8 -15   7    1.95    3.77
   8  15   7    8.94    8.19
   8  15  -7    1.03    4.58
   9 -15   7   75.94    6.04
   9 -15  -7   85.97    6.08
   9  15  -7   89.48    9.93
   9  15   7   70.88   10.68
   9  15  -7   85.91    6.87
   0  16  -7  216.98   11.45
   0  16   7  192.53   11.43
  -1  16   7  339.80   13.63
  -1  16  -7  323.42   13.03
   1  16   7  327.85   14.09
   1  16  -7  295.22   13.12
  -2  16  -7   31.17    6.38
   2 -16  -7   36.94    4.30
   2  16  -7   31.77    7.13
   2  16   7   24.15    7.48
  -2  16   7   34.72    6.66
  -3  16   7  197.67   10.60
   3  16   7  223.89   12.91
   3  16  -7  190.82   11.46
   3 -16  -7  199.75    7.93
   4  16  -7   23.57    7.10
   4 -16  -7   16.77    4.27
   4 -16   7   14.78    5.04
   4  16   7   11.01    7.76
  -4  16   7   12.74    5.72
   5  16   7   70.30    9.64
   5 -16   7   64.48    6.16
   5  16  -7   50.28    8.64
   5 -16  -7   49.92    5.58
   5  16  -7   61.81    5.07
   6  16  -7   83.28    6.04
   6  16  -7   79.66    9.34
   6  16   7   93.79   10.66
   7  16   7   87.51   10.94
   7  16  -7   86.41    6.58
   7  16  -7   67.18    9.08
   7 -16   7   95.75    6.08
   8  16  -7   -8.87    6.57
   8 -16   7   -3.19    3.61
   8  16   7   -6.71    8.02
   9  16   7  169.79   13.75
   9 -16   7  183.47    8.18
   9  16  -7  200.20   12.98
   0  17  -7   -0.37    5.84
   0  17   7    9.89    6.59
   1  17   7   -1.06    6.39
   1  17  -7   11.95    6.52
  -1  17   7   10.87    6.35
  -1  17  -7    9.57    5.97
   2  17  -7  135.93   10.21
   2  17   7  146.47   11.06
  -2  17  -7  143.39   10.09
  -2  17   7  137.47   10.20
   3 -17  -7    8.16    4.03
  -3  17   7   -2.96    5.75
   3  17  -7   15.78    6.84
   3  17   7    1.67    7.13
   4 -17   7  415.33   13.43
   4  17  -7  383.94   15.64
   4 -17  -7  392.39   11.51
   4  17   7  412.10   17.14
   5 -17   7  104.87    7.73
   5 -17  -7   88.04    6.78
   5  17   7   92.84   10.80
   5  17  -7   90.45    9.69
   6  17  -7   23.26    7.99
   6 -17  -7   34.07    5.64
   6  17   7   32.51    9.11
   7  17   7   66.95   10.54
   7 -17   7   71.62    5.56
   7  17  -7   72.16    9.68
   8  17  -7   35.78    8.90
   8 -17   7   26.23    4.61
   8  17   7   43.92   10.04
   0  18   7   29.62    7.58
   0  18  -7   26.94    7.21
   1  18   7    4.03    6.95
  -1  18   7   13.13    6.70
  -1  18  -7   16.69    6.68
   1  18  -7   21.92    7.19
  -2  18   7   12.27    6.71
  -2  18  -7    7.28    6.09
   2  18  -7   10.38    6.73
   2  18   7    1.39    7.03
   3  18  -7   52.64    8.29
  -3  18   7   36.07    7.49
   3  18   7   41.15    8.84
   4  18   7   57.77    9.42
   4  18  -7   52.38    8.63
   4 -18   7   63.98    7.04
   4 -18  -7   74.53    6.20
   5  18   7   57.73   10.01
   5 -18  -7   60.95    6.15
   5 -18   7   48.58    6.35
   5  18  -7   62.57    9.10
   6 -18  -7    9.27    4.96
   6  18  -7   -1.54    7.22
   6  18   7   23.85    8.97
   7 -18   7  100.86    6.41
   7 -18  -7   93.92    7.52
   7  18   7   99.43   11.92
   7  18  -7   78.30    9.93
   0  19   7   -3.91    6.41
   0  19  -7   -2.21    6.35
   1  19  -7   98.59    9.80
   1  19   7   84.79    9.95
  -1  19  -7   98.61    9.40
  -1  19   7   83.88    9.43
   2  19  -7   23.69    7.52
  -2  19  -7   23.04    7.07
   2  19   7   34.27    8.56
  -2  19   7   19.13    7.33
   3  19   7   17.45    8.06
   3  19  -7    3.31    6.82
  -3  19   7    3.84    6.46
   4 -19   7   20.75    5.98
   4  19   7   22.96    8.49
   4  19  -7   18.22    7.67
   5  19  -7   23.92    8.02
   5  19   7   14.55    8.52
   6  19   7   18.17    8.90
   6 -19  -7   23.18    5.54
   6  19  -7   19.98    8.34
   0  20  -7   55.84    8.70
   0  20   7   87.06    9.97
  -1  20   7   63.27    9.23
   1  20  -7   40.79    8.45
  -1  20  -7   65.06    8.70
   1  20   7   65.45    9.49
  -2  20  -7   -8.08    6.26
  -2  20   7    8.13    7.33
   2  20  -7   -2.37    6.82
   2  20   7    1.44    7.55
   3  20  -7   73.40    9.42
  -3  20   7   72.41    9.18
   3  20   7   86.96   10.73
   4 -20   7   76.90    7.94
   4  20   7   63.51   10.31
   4  20  -7   57.80    9.33
   5  20   7    7.04    8.69
   5  20  -7    0.74    7.59
   0  21  -7   -6.06    6.61
   0  21   7    1.70    7.46
  -1  21   7    3.00    7.69
   1  21   7   -0.73    7.28
   1  21  -7   -4.59    6.80
  -1  21  -7    3.37    7.01
   2  21   7   22.97    8.50
   2  21  -7   18.69    7.67
  -2  21  -7   16.26    7.37
  -2  21   7   28.91    8.35
   3  21  -7    6.91    7.39
   3  21   7   -0.85    8.02
   3 -21   7    7.64    6.52
   0   0  -8 6138.63   97.26
   0   0  -8 6186.43  100.82
   0   0   8 6179.60   98.20
   1   0   8   -1.43    2.04
  -1   0   8    0.13    1.51
   1   0  -8    0.97    1.40
   1   0  -8    1.07    1.31
   2   0   8    0.89    2.60
  -2   0   8    7.36    1.41
   2   0  -8    7.26    1.81
   3   0  -8 8301.29  131.50
   3   0   8 8440.64  132.04
  -3   0   8 8672.84  133.02
   3   0   8 8258.45  130.45
   4   0   8  748.54   14.88
   4   0  -8  751.28   13.47
   4   0   8  741.73   13.26
   5   0   8   18.43    2.41
   5   0   8   14.84    3.46
   5   0  -8   20.56    1.93
   5   0  -8   22.16    2.70
   6   0   8 2413.73   39.71
   6   0   8 2444.40   41.77
   6   0  -8 2419.56   39.90
   6   0  -8 2479.57   39.28
   7   0   8  433.97    9.76
   7   0  -8  436.45    9.98
   7   0   8  421.30   11.61
   8   0  -8    9.84    3.28
   8   0   8    8.31    4.46
   8   0   8   13.34    3.06
   9   0  -8   37.57    3.90
   9   0   8   37.16    3.70
  10   0  -8   -2.15    3.07
  10   0   8    4.91    3.52
  11   0   8   47.68    4.86
  11   0  -8   51.48    5.12
  12   0   8  279.41    9.47
  12   0  -8  281.53    9.45
  13   0   8    4.60    4.45
  13   0  -8    1.02    4.07
   0  -1   8   -0.62    1.62
   0   1  -8   -0.11    1.29
   0   1   8   -1.54    2.03
   0  -1  -8   -2.81    1.57
   0  -1  -8   -1.38    0.93
   1  -1  -8 1266.00   20.27
   1   1   8 1276.21   21.84
   1   1  -8 1267.77   20.50
   1   1  -8 1284.41   21.15
  -1  -1   8 1278.93   20.94
  -1   1   8 1287.27   21.01
   1  -1   8 1294.15   21.28
   1  -1  -8 1250.16   21.36
   2  -1   8  258.22    6.32
   2   1   8  251.60    7.51
   2   1   8  253.92    5.05
  -2  -1   8  255.80    5.64
   2  -1  -8  252.88    5.30
   2   1  -8  245.09    5.54
  -2   1   8  243.37    5.16
   3   1  -8   94.93    3.46
   3  -1   8   98.54    4.70
   3   1   8   98.42    3.24
   3   1   8  100.78    5.83
   3   1  -8   97.18    3.93
   4  -1  -8  537.26   10.17
   4  -1   8  519.56    9.93
   4   1  -8  522.48   10.04
   4   1  -8  530.11   10.20
   4   1   8  521.35    9.80
   4   1   8  517.04   11.95
   4  -1   8  526.49   11.17
   5   1  -8  126.55    4.43
   5  -1  -8  121.80    4.59
   5   1   8  126.61    4.30
   5  -1   8  120.14    4.43
   5   1   8  121.83    6.85
   5   1  -8  123.64    4.62
   5  -1   8  125.09    5.75
   6   1  -8   18.55    2.82
   6   1   8   20.11    4.05
   6   1  -8   23.85    3.01
   6  -1   8   20.79    3.67
   6   1   8   20.89    2.64
   6  -1  -8   19.68    2.65
   6  -1   8   20.31    2.77
   7  -1   8  678.25   14.91
   7  -1  -8  673.02   13.60
   7   1   8  657.64   15.64
   7   1  -8  661.02   13.54
   7   1   8  671.89   13.28
   7  -1   8  669.30   13.38
   8   1  -8  132.93    5.84
   8   1   8  133.42    7.92
   8  -1  -8  134.52    5.59
   8  -1   8  138.43    7.50
   8   1   8  139.33    5.60
   8  -1   8  137.70    5.73
   9   1   8   -2.08    3.13
   9  -1   8   -4.67    2.94
   9   1  -8    1.60    3.37
   9  -1  -8   -1.17    3.28
  10  -1   8    4.01    3.10
  10   1   8    3.59    3.47
  10  -1  -8    2.01    3.56
  10   1  -8    6.12    3.70
  11   1  -8    2.47    4.06
  11  -1  -8   11.00    4.09
  11   1   8   10.40    3.82
  11  -1   8    3.11    3.84
  12   1   8    3.49    4.11
  12  -1   8    5.58    4.16
  12  -1  -8   -0.17    4.07
  12   1  -8   10.41    4.52
  13  -1  -8  181.14    8.12
  13   1   8  173.93    8.20
  13  -1   8  185.64    8.37
  13   1  -8  191.63    8.59
   0   2   8  825.42   15.03
   0  -2   8  813.76   14.25
   0   2  -8  793.14   13.58
   0  -2  -8  823.90   14.29
  -1  -2  -8  369.23    7.32
   1  -2   8  367.82    7.52
  -1  -2   8  364.34    7.72
   1  -2  -8  360.53    6.40
   1   2  -8  371.83    6.66
  -1   2   8  358.66    7.82
   1   2   8  359.33    6.14
   1   2  -8  354.47    6.88
   1   2   8  357.36    8.88
   1  -2  -8  364.69    7.46
   2  -2  -8  132.01    3.48
   2  -2   8  122.23    4.33
   2   2  -8  123.07    3.68
  -2   2   8  124.54    4.11
   2   2  -8  122.68    3.27
   2   2   8  119.14    6.20
   2   2  -8  129.64    4.95
   2   2   8  118.76    3.11
   3   2  -8  118.17    4.81
   3   2   8  119.33    6.61
   3   2  -8  119.19    4.11
   3   2   8  119.43    3.53
   3  -2  -8  122.46    3.84
   3  -2   8  120.08    4.65
   4   2  -8  236.03    5.91
   4   2   8  233.52    8.21
   4  -2   8  221.84    6.40
   4   2   8  221.78    5.28
   4   2  -8  229.30    6.52
   4  -2  -8  221.29    5.47
   4  -2   8  220.26    5.56
   5   2  -8    4.02    2.73
   5  -2   8    0.63    1.85
   5   2  -8    2.15    2.03
   5   2   8    0.95    1.90
   5  -2   8    2.00    2.62
   5  -2  -8   -1.96    2.13
   5   2   8    1.87    3.67
   6   2  -8  655.18   12.87
   6  -2  -8  650.61   12.87
   6   2  -8  665.33   13.33
   6   2   8  641.24   15.22
   6  -2   8  654.04   12.73
   6  -2   8  671.51   13.82
   6   2   8  631.50   12.46
   7   2  -8    1.61    2.53
   7  -2   8    2.94    2.60
   7   2   8    4.85    4.24
   7   2  -8   -1.55    3.02
   7  -2   8   -1.99    3.21
   7   2   8   -0.48    2.47
   7  -2  -8   -0.44    2.72
   8  -2   8  141.85    7.29
   8   2  -8  142.20    6.08
   8  -2   8  141.79    5.80
   8  -2  -8  137.42    5.64
   8   2   8  144.49    8.41
   8   2   8  142.94    5.58
   9   2   8   27.10    5.83
   9   2   8   34.70    3.91
   9   2  -8   27.42    4.12
   9  -2  -8   27.13    3.69
   9  -2   8   33.21    3.98
  10   2   8   63.37    4.84
  10  -2   8   62.39    4.91
  10  -2  -8   66.86    4.99
  10   2  -8   60.53    5.07
  11   2   8   12.02    3.97
  11  -2  -8    9.02    4.05
  11   2  -8   14.89    4.28
  11  -2   8   16.46    4.12
  12   2   8   63.68    5.49
  12  -2   8   69.72    5.82
  12   2  -8   76.61    6.09
  12  -2  -8   73.11    5.92
  13   2  -8   98.26    7.14
  13  -2   8  103.95    6.99
  13  -2  -8   96.81    6.87
  13   2   8  103.95    6.93
   0   3   8    1.48    3.10
   0  -3   8   -1.20    2.36
   0  -3  -8   -1.55    1.69
   1   3  -8   21.28    2.94
  -1   3   8   20.76    3.08
   1  -3   8   23.07    2.54
   1  -3  -8   24.61    1.52
  -1  -3  -8   21.65    2.26
   1  -3  -8   19.74    2.32
   1   3   8   13.42    3.57
   1   3  -8   20.34    2.11
   2   3   8  941.25   15.07
   2   3  -8  909.13   17.02
   2  -3  -8  969.98   15.46
   2   3   8  928.15   18.20
   2   3  -8  934.32   15.60
   2  -3   8  939.91   16.42
   2   3  -8  916.57   15.84
  -2   3   8  933.08   16.33
  -3   3   8  419.91    7.81
   3   3  -8  411.69    9.58
   3   3   8  415.38    7.59
   3  -3  -8  405.80    7.96
   3  -3   8  405.39    8.59
   3   3   8  410.08   10.81
   4  -3  -8   70.60    3.49
   4   3   8   74.14    5.37
   4   3  -8   67.63    4.91
   4   3  -8   58.77    3.65
   4   3   8   62.15    3.10
   4  -3   8   61.32    4.03
   5  -3  -8  961.39   16.97
   5   3  -8  943.99   17.18
   5  -3   8  965.42   17.54
   5   3   8  945.14   19.88
   5   3   8  943.49   16.60
   5  -3   8  954.78   17.17
   5   3  -8  974.51   18.27
   6  -3   8  429.24   10.08
   6   3   8  411.78   12.20
   6   3  -8  441.04    9.72
   6  -3   8  418.13    9.51
   6   3  -8  429.15   10.61
   6   3   8  427.41    9.10
   6  -3  -8  438.41    9.38
   7  -3   8  762.71   15.74
   7   3  -8  759.75   15.26
   7   3  -8  789.38   16.03
   7   3   8  777.19   18.02
   7  -3  -8  770.08   15.05
   7   3   8  762.03   14.65
   7  -3   8  754.82   14.99
   8   3  -8   41.04    4.15
   8  -3   8   31.56    4.46
   8   3   8   35.42    3.58
   8   3   8   40.07    5.99
   8  -3   8   38.57    3.87
   8  -3  -8   43.17    4.01
   9   3   8   35.00    6.25
   9  -3   8   19.71    3.66
   9  -3  -8   25.10    3.58
   9   3  -8   18.85    3.65
   9   3   8   23.03    3.65
  10   3   8    6.56    3.58
  10   3  -8    2.99    3.84
  10  -3  -8    9.03    3.81
  10  -3   8    0.52    3.07
  11  -3   8  218.29    8.27
  11   3   8  205.33    7.76
  11  -3  -8  209.18    7.89
  11   3  -8  211.61    8.38
  12  -3  -8  310.12   10.28
  12   3   8  338.42   10.32
  12   3  -8  321.46   10.57
  12  -3   8  335.96   10.55
  13   3  -8    1.24    4.54
  13  -3  -8    0.51    4.46
  13   3   8    1.44    4.36
  13  -3   8    0.62    4.48
   0  -4  -8  549.99   10.56
   0   4   8  549.96   12.33
   1  -4  -8  104.24    2.71
   1   4   8   99.58    6.81
   1  -4  -8  101.90    3.83
   1  -4   8  109.04    4.78
  -1  -4  -8  105.95    3.99
   1   4  -8  103.78    3.80
  -1   4   8  117.11    5.84
   1   4  -8  108.01    5.46
   2   4   8  839.46   13.76
   2  -4  -8  875.28   14.20
   2   4  -8  833.76   14.78
   2   4  -8  847.79   16.44
   2   4   8  828.05   17.45
   2  -4   8  877.56   15.48
  -2   4   8  847.21   15.61
  -3   4   8   50.88    2.91
   3  -4  -8   45.00    3.04
   3   4   8   51.96    5.04
   3  -4   8   45.19    2.95
   3   4  -8   39.34    4.01
   3   4   8   43.74    2.47
   3   4  -8   44.36    3.29
   4  -4   8  146.80    4.98
   4   4   8  131.96    7.76
   4  -4  -8  142.72    4.52
   4   4   8  141.35    4.11
   4   4  -8  146.84    6.60
   4   4  -8  146.66    4.86
   5  -4   8   27.63    2.62
   5   4   8   27.93    4.96
   5   4   8   30.17    2.60
   5   4  -8   26.94    2.94
   5  -4   8   26.93    2.88
   5  -4  -8   30.96    2.58
   5   4  -8   25.41    4.00
   6   4   8   29.21    5.29
   6   4   8   22.60    2.85
   6  -4   8   28.24    3.23
   6  -4  -8   26.27    2.93
   6   4  -8   22.82    3.10
   6  -4   8   24.22    3.02
   6   4  -8   25.58    4.15
   7   4  -8  829.25   16.12
   7   4  -8  826.65   17.37
   7   4   8  819.13   15.48
   7  -4   8  814.32   16.40
   7  -4   8  831.71   16.08
   7   4   8  809.65   19.19
   7  -4  -8  808.24   15.86
   8   4   8  292.06    7.97
   8   4   8  290.69   11.41
   8   4  -8  284.93    8.33
   8  -4  -8  263.31    7.98
   8  -4   8  270.53    8.11
   9  -4  -8   26.51    3.92
   9  -4   8   28.82    4.04
   9   4   8   39.34    6.60
   9   4   8   33.50    3.89
   9   4  -8   29.94    4.25
  10   4  -8   37.84    4.65
  10  -4  -8   25.86    4.15
  10   4   8   35.12    4.19
  10  -4   8   21.62    4.04
  11   4   8  175.28    7.33
  11   4  -8  189.93    7.93
  11  -4   8  183.60    7.75
  11  -4  -8  168.64    7.53
  12  -4  -8   64.11    5.81
  12  -4   8   74.01    6.00
  12   4   8   80.33    5.93
  12   4  -8   87.54    6.33
  13  -4   8   18.22    4.92
  13  -4  -8    7.19    4.61
  13   4  -8    7.06    4.91
  13   4   8   14.83    4.83
   0  -5  -8   -4.17    1.90
   0   5  -8   -0.65    2.86
   0   5   8   -4.34    3.52
   1   5  -8 1093.07   18.41
   1  -5  -8 1096.92   17.47
  -1  -5  -8 1092.39   18.95
   1  -5  -8 1086.91   19.15
   1   5  -8 1074.01   20.33
   1   5   8 1092.69   21.13
  -1   5   8 1066.29   20.19
   2   5  -8  252.11    5.92
   2  -5   8  256.74    6.94
  -2   5   8  245.97    7.49
   2   5  -8  253.25    8.28
   2   5   8  236.78    9.06
   2  -5  -8  260.30    5.33
   2   5   8  248.97    4.79
  -2  -5  -8  250.87    6.00
   3  -5   8  290.03    7.19
   3   5  -8  293.99    6.70
  -3   5   8  292.56    7.30
   3  -5  -8  295.14    6.26
   3   5   8  299.66   10.09
   3   5  -8  286.63    8.82
   3   5   8  290.94    5.76
   4   5  -8  245.32    6.41
   4   5   8  242.52    5.60
   4  -5   8  246.70    6.51
   4  -5  -8  253.29    6.02
   4   5   8  242.67    9.71
   4   5  -8  250.04    8.46
  -4   5   8  250.92    5.88
   5  -5   8  146.64    5.16
   5   5  -8  143.14    5.18
   5   5   8  141.10    4.32
   5   5   8  139.30    8.36
   5  -5  -8  142.80    4.88
   5   5  -8  157.55    7.38
   5  -5  -8  140.17    3.32
   5  -5   8  141.14    5.15
   6   5   8   64.74    3.86
   6   5  -8   64.87    4.36
   6   5  -8   68.88    5.46
   6  -5  -8   75.11    4.17
   6  -5   8   67.95    4.55
   6  -5   8   68.11    3.94
   6   5   8   61.56    6.30
   7   5  -8   69.92    5.88
   7   5  -8   80.74    4.91
   7   5   8   77.18    7.06
   7  -5   8   81.12    5.24
   7  -5   8   82.31    4.80
   7  -5  -8   75.07    4.66
   7   5   8   76.61    4.19
   8   5   8  439.33   10.38
   8  -5  -8  442.81   10.75
   8   5  -8  460.06   11.02
   8   5   8  470.02   14.57
   8  -5   8  450.50   10.78
   9   5   8   49.31    4.22
   9   5   8   48.58    7.21
   9   5  -8   45.77    4.58
   9  -5   8   45.53    4.35
   9  -5  -8   44.05    4.36
  10  -5  -8    3.73    3.54
  10   5  -8    8.94    4.00
  10   5   8    2.71    3.56
  10  -5   8    4.04    3.57
  11  -5   8  411.64   11.61
  11   5   8  422.17   11.21
  11   5  -8  416.92   11.79
  12  -5   8   23.38    4.80
  12   5   8   17.64    4.60
  12  -5  -8   16.40    4.65
  12   5  -8   37.50    5.28
  13  -5  -8   83.93    6.57
  13   5   8   70.36    6.30
  13   5  -8   82.28    6.78
  13  -5   8   90.64    6.84
   0  -6  -8  246.23    6.12
   0   6  -8  247.68    7.98
   0   6   8  240.75    8.85
   1   6  -8   27.74    4.04
  -1  -6  -8   31.55    2.48
   1   6   8   27.56    4.62
   1  -6  -8   27.16    2.03
  -1   6   8   21.79    3.98
   1   6  -8   30.81    2.59
   1  -6  -8   27.83    2.70
   2   6   8  229.98    9.28
   2   6   8  255.76    4.95
   2   6  -8  261.90    6.15
   2  -6   8  260.66    7.28
  -2   6   8  248.30    7.95
   2   6  -8  248.23    8.55
  -2  -6  -8  256.83    6.14
   2  -6  -8  254.28    5.42
  -3   6   8   11.38    2.92
   3  -6   8    6.39    2.44
   3   6   8    7.00    1.51
   3   6   8   16.40    4.67
   3   6  -8    7.63    3.84
   3   6  -8    7.14    2.31
   3  -6  -8    9.58    1.95
   4  -6   8   52.91    3.39
   4   6   8   50.24    5.81
   4  -6  -8   47.05    3.16
   4   6  -8   45.87    3.29
  -4   6   8   52.67    3.99
   4   6  -8   50.48    5.06
   4   6   8   56.36    2.81
   5  -6  -8  313.77    6.60
   5  -6  -8  312.95    7.41
   5   6  -8  314.48    7.88
   5   6   8  317.00    7.04
   5   6  -8  323.41   10.35
   5  -6   8  318.00    7.83
   5   6   8  303.44   11.35
   6  -6   8   10.74    2.69
   6   6   8   10.73    5.22
   6  -6   8   12.35    2.89
   6   6  -8   12.76    2.99
   6  -6  -8   13.70    2.72
   6   6  -8   14.67    4.52
   6   6   8   15.99    2.46
   7  -6  -8  212.86    6.75
   7   6  -8  219.17    7.09
   7   6   8  189.62   10.21
   7  -6   8  217.91    7.11
   7   6  -8  202.04    9.11
   7  -6   8  222.10    7.08
   7   6   8  215.52    6.48
   8   6   8  304.85   12.40
   8   6  -8  285.37   10.64
   8  -6   8  295.16    8.36
   8   6  -8  296.52    8.71
   8   6   8  292.92    7.92
   8  -6  -8  270.26    8.22
   9  -6  -8   13.79    3.73
   9   6   8   16.03    3.53
   9   6  -8   13.10    4.02
   9   6   8   24.56    6.70
   9  -6   8   14.61    3.77
  10  -6   8    5.37    3.65
  10   6   8    9.92    3.98
  10  -6  -8    5.10    3.76
  10   6  -8   18.45    4.35
  11   6   8   56.37    5.12
  11   6  -8   48.72    5.50
  11  -6  -8   55.67    4.99
  11  -6   8   58.33    5.36
  12   6   8   14.27    4.59
  12  -6   8    9.73    4.35
  12   6  -8   15.50    5.04
  12  -6  -8   16.35    4.69
   0   7   8    2.94    3.93
   0  -7  -8   -3.62    1.84
   0   7  -8   -1.13    3.21
   1   7   8  283.83    9.97
  -1   7   8  277.57    9.28
   1  -7  -8  290.11    7.06
  -1  -7  -8  282.31    6.67
   1   7  -8  268.10    6.66
   1   7  -8  294.68    9.27
  -1   7  -8  287.91    8.79
   2   7  -8    0.62    2.10
   2   7  -8    2.46    3.78
  -2   7   8    4.11    3.34
   2  -7   8   -0.35    2.75
  -2  -7  -8    4.41    2.12
   2  -7  -8    2.96    2.55
   2   7   8    0.86    1.34
   2   7   8   -5.76    4.18
   2  -7  -8    2.93    1.60
   3  -7  -8  526.38    9.85
   3  -7   8  519.53   11.31
   3   7  -8  514.11   10.50
   3   7   8  512.15   14.19
   3   7  -8  506.64   13.18
   3   7   8  509.85    9.23
  -3   7   8  513.03   11.61
   4  -7   8  138.16    5.36
   4   7  -8  126.58    7.58
   4   7  -8  141.05    5.06
   4  -7  -8  133.01    4.63
  -4   7   8  140.48    5.54
   4   7   8  137.47    4.05
   4   7   8  124.14    8.75
   5   7   8   35.58    2.64
   5  -7   8   41.31    3.35
   5   7  -8   40.71    5.23
   5   7  -8   41.52    3.47
   5  -7  -8   36.81    3.13
   5   7   8   21.82    5.75
   6  -7  -8   22.75    2.91
   6   7   8   21.96    2.78
   6  -7   8   26.11    3.05
   6  -7   8   24.44    3.05
   6   7  -8   21.40    3.35
   6   7   8   18.78    5.81
   6   7  -8   34.91    5.31
   7  -7   8    4.19    2.86
   7  -7   8    8.55    3.06
   7   7   8    0.26    5.55
   7   7  -8    7.40    4.83
   7   7   8   11.34    2.90
   7  -7  -8    5.70    2.88
   7   7  -8    9.61    3.35
   8  -7  -8  160.65    6.47
   8  -7   8  169.44    6.76
   8   7  -8  170.71    6.83
   8   7  -8  170.44    9.17
   8   7   8  180.04   10.90
   8   7   8  175.17    6.37
   9   7   8   94.10    8.89
   9   7  -8   89.69    5.45
   9   7   8  103.84    5.39
   9  -7   8  106.59    5.56
   9  -7  -8  100.07    5.62
  10  -7   8    0.98    3.18
  10   7   8    4.43    3.61
  10   7   8   10.10    6.79
  10  -7  -8    5.55    3.32
  10   7  -8    3.20    4.10
  11   7   8    6.23    3.97
  11   7  -8   15.97    4.76
  11  -7  -8    1.64    3.82
  11  -7   8    3.42    4.00
  12  -7   8    3.67    4.21
  12   7  -8   12.21    4.88
  12  -7  -8    5.21    4.39
  12   7   8    7.34    4.36
   0  -8  -8   60.46    3.64
   0   8   8   60.24    5.64
   0   8  -8   64.91    5.20
   1  -8  -8   60.67    3.61
  -1  -8  -8   71.51    3.90
  -1   8   8   66.83    5.45
   1   8   8   66.20    6.19
   1   8  -8   63.86    5.40
  -1   8  -8   67.02    5.06
   2   8  -8  293.13    7.15
   2   8  -8  290.11    9.93
  -2   8   8  297.66    9.55
   2  -8  -8  300.00    6.35
   2  -8   8  273.35    8.59
   2   8   8  292.02    5.80
   2   8   8  296.82   10.97
  -2  -8  -8  290.43    6.99
   2  -8  -8  292.91    7.44
   3  -8  -8  839.38   14.67
  -3   8   8  838.99   16.96
   3   8   8  814.83   14.13
   3   8  -8  848.70   15.49
   3   8   8  788.68   19.29
   3  -8   8  833.54   16.62
   3   8  -8  832.35   18.56
   4  -8   8    9.10    2.89
   4   8   8   14.30    5.34
  -4   8   8   17.04    3.21
   4   8   8   10.50    1.87
   4  -8  -8   11.18    2.36
   4   8  -8    9.08    2.63
   4   8  -8    4.65    4.33
   5   8  -8   29.10    5.37
   5  -8  -8   33.15    2.95
   5  -8   8   32.57    3.27
   5   8  -8   36.91    3.48
   5   8   8   34.25    6.27
  -5   8   8   37.51    3.16
   5   8   8   33.58    2.77
   6  -8   8    4.64    2.62
   6   8  -8   11.57    5.05
   6  -8  -8    7.91    2.73
   6   8   8   11.05    5.84
   6   8   8   14.32    2.77
   6   8  -8    9.88    3.14
   6  -8   8    4.30    2.83
   7  -8  -8  970.39   18.57
   7   8   8  978.62   18.04
   7   8  -8  983.56   19.04
   7   8   8  957.97   23.65
   7   8  -8 1007.25   22.28
   7  -8   8  983.44   18.78
   7  -8   8  990.97   19.12
   8  -8  -8  100.93    5.43
   8   8   8  118.95    9.43
   8   8  -8  117.31    6.08
   8   8  -8  102.83    7.95
   8  -8   8  108.05    5.81
   8   8   8  121.25    5.47
   9   8  -8  113.82    6.37
   9  -8  -8  132.96    6.32
   9  -8   8  124.56    5.98
   9   8   8  130.90    6.10
   9   8   8  118.92    9.79
  10   8   8   76.35    8.80
  10  -8  -8   57.83    5.00
  10  -8   8   55.11    4.83
  10   8  -8   76.58    5.81
  10   8   8   63.57    4.97
  11   8   8   17.29    4.58
  11   8  -8   16.78    4.90
  11  -8   8   16.86    4.51
  11  -8  -8   11.78    3.91
  12   8  -8   54.67    6.13
  12  -8  -8   46.69    5.17
  12  -8   8   38.05    5.43
  12   8   8   42.30    5.56
   0   9   8   -3.19    4.19
   0   9  -8   -6.62    3.64
   0  -9  -8   -0.90    2.08
  -1   9  -8   52.90    4.96
  -1   9   8   42.43    5.22
   1   9  -8   36.51    5.17
   1   9   8   48.25    5.88
  -1  -9  -8   48.10    3.39
  -1  -9   8   46.03    2.05
   1  -9  -8   49.02    3.37
  -2  -9  -8   32.86    2.84
   2  -9  -8   32.43    3.36
   2   9  -8   26.39    5.00
  -2   9   8   30.87    4.65
   2   9   8   36.87    5.71
   2   9  -8   30.88    3.05
   3   9   8   69.13    6.81
   3  -9   8   73.99    5.46
   3   9  -8   76.82    4.19
   3   9   8   64.34    3.00
   3   9  -8   87.36    6.54
   3  -9  -8   63.18    3.45
  -3   9   8   71.05    5.17
  -4   9   8  689.07   14.69
   4   9  -8  680.87   17.10
   4   9   8  683.72   12.42
   4   9  -8  687.81   13.66
   4  -9   8  682.37   14.49
   4  -9  -8  686.57   13.02
   4   9   8  690.05   18.22
   5   9  -8   97.88    4.93
  -5   9   8   95.09    5.21
   5   9   8   92.42    8.12
   5  -9   8   85.70    5.07
   5   9  -8   95.56    7.26
   5   9   8   93.95    3.96
   5  -9  -8   88.51    4.28
   6   9  -8   39.65    6.15
   6  -9   8   31.91    3.71
   6  -9  -8   39.10    3.46
   6   9   8   37.72    3.13
   6   9  -8   37.18    3.83
   6   9   8   38.34    6.92
   6  -9   8   37.26    3.72
   7  -9   8   19.72    3.32
   7   9  -8   18.20    3.71
   7  -9   8   13.41    3.12
   7   9   8   30.41    6.96
   7   9  -8   21.86    5.99
   7  -9  -8   19.20    3.31
   7   9   8   19.84    3.13
   8   9  -8   33.32    4.37
   8   9   8   41.65    7.56
   8  -9   8   47.29    4.44
   8   9  -8   44.44    6.83
   8  -9  -8   43.54    4.25
   8   9   8   44.25    3.84
   9   9   8  102.06    9.73
   9   9   8  108.76    5.85
   9   9  -8  113.01    6.35
   9  -9  -8   96.57    5.77
   9  -9   8  101.61    6.08
  10   9   8  139.16    6.49
  10  -9  -8  122.69    6.48
  10   9  -8  125.10    7.00
  10  -9   8  133.05    6.96
  10   9   8  126.83   10.62
  11  -9   8   59.61    5.64
  11   9  -8   67.87    6.11
  11  -9  -8   55.04    5.49
  12  -9  -8   62.12    5.97
  12  -9   8   63.58    6.06
  12   9  -8   69.21    6.89
   0  10   8  485.92   13.99
   0 -10  -8  480.12   10.48
   1 -10  -8  154.26    5.45
   1  10  -8  131.89    8.10
   1  10   8  143.44    8.86
  -1 -10  -8  153.52    5.23
  -1  10  -8  150.96    7.79
  -1 -10   8  151.99    3.64
  -1  10   8  146.25    8.17
  -2 -10  -8 1278.23   22.69
   2  10   8 1268.17   27.16
   2  10  -8 1265.89   26.28
   2 -10  -8 1302.63   23.51
   2  10  -8 1289.17   22.55
  -2  10   8 1284.05   25.53
  -2  10  -8 1289.33   25.17
   3 -10   8 1147.86   22.47
   3  10   8 1151.62   19.30
  -3  10   8 1189.26   23.07
   3  10  -8 1110.56   20.59
   3 -10  -8 1165.81   19.84
   3  10  -8 1130.61   24.51
   4 -10  -8  203.78    5.87
   4 -10   8  198.85    7.38
   4  10   8  197.64    5.27
   4  10   8  194.76   10.55
   4  10  -8  196.52    6.39
  -4  10   8  205.64    7.76
   4  10  -8  182.55    9.45
   5  10   8   48.37    3.14
   5  10  -8   41.08    6.26
   5 -10  -8   43.65    3.37
   5  10   8   30.78    6.85
  -5  10   8   43.90    4.14
   5  10  -8   37.62    3.82
   5 -10   8   41.81    3.98
   6  10   8   26.40    6.95
   6  10  -8   25.92    3.73
   6  10   8   26.88    3.13
   6 -10   8   26.12    3.50
   6 -10  -8   20.20    3.11
   6  10  -8   27.57    6.22
   7 -10  -8  139.31    5.76
   7 -10   8  138.30    6.18
   7  10  -8  125.25    9.23
   7  10   8  121.95    5.21
   7  10   8  127.18    9.88
   7  10  -8  127.91    6.41
   8  10  -8  153.16    9.82
   8  10   8  164.85    6.20
   8  10   8  158.09   11.16
   8  10  -8  157.04    6.87
   8 -10  -8  151.34    6.36
   8 -10   8  145.06    6.68
   9 -10   8  368.90   10.62
   9  10  -8  357.84   10.60
   9  10   8  396.32   15.82
   9 -10  -8  370.71   10.22
  10 -10   8   98.74    6.43
  10  10  -8   96.79    6.58
  10 -10  -8  108.23    6.42
  10  10   8  104.37   10.55
  11  10  -8   68.04    6.27
  11 -10  -8   49.64    5.30
  11 -10   8   55.47    5.29
   0 -11  -8   -1.05    2.28
   0  11   8   -2.38    4.55
   0  11  -8    5.37    4.42
  -1 -11  -8 1477.27   25.59
  -1  11   8 1428.85   29.04
   1 -11  -8 1457.86   25.98
   1  11   8 1417.83   29.76
   1  11  -8 1432.48   29.04
  -1  11  -8 1448.67   28.42
  -2  11   8   13.43    4.73
   2 -11  -8   13.95    3.13
   2  11  -8    8.52    4.93
   2  11   8   14.05    5.69
   2  11  -8   14.87    2.90
  -2  11  -8   15.53    4.36
  -2 -11  -8   15.10    2.73
   3  11   8  517.43    9.96
   3 -11  -8  523.97   12.10
   3 -11  -8  533.37   10.52
   3  11  -8  533.00   11.54
   3 -11   8  518.76   13.29
   3  11  -8  511.02   15.27
  -3  11   8  529.94   13.77
   3  11   8  518.44   16.22
   4 -11  -8  379.38    8.64
  -4  11   8  371.45   10.91
   4  11  -8  374.85   13.14
   4  11   8  379.04   14.18
   4  11  -8  379.60    9.51
   4  11   8  374.36    8.06
   4 -11   8  379.22   10.62
   5  11  -8    3.40    3.04
   5  11   8   -5.17    5.85
   5 -11   8    0.55    3.22
   5 -11  -8    3.92    2.56
   5  11  -8   -2.75    5.20
   5  11   8    9.09    2.50
   6 -11  -8    0.39    2.94
   6  11   8    2.55    6.33
   6 -11   8   -0.16    2.92
   6  11  -8    3.74    5.55
   6  11  -8    3.41    3.35
   7  11   8   12.46    7.10
   7  11  -8   14.47    3.83
   7 -11   8   22.92    3.90
   7 -11  -8   19.07    3.47
   7  11  -8   14.34    6.29
   8 -11   8  159.51    6.92
   8  11   8  159.73   11.61
   8  11  -8  151.44    6.93
   8  11  -8  164.11   10.30
   8 -11  -8  156.29    6.46
   9  11  -8  225.64   11.82
   9  11  -8  234.37    8.73
   9  11   8  234.29   13.50
   9 -11  -8  230.91    8.14
   9 -11   8  243.28    8.69
  10  11  -8   56.79    5.74
  10  11   8   53.73    9.42
  10 -11   8   56.83    5.51
  10 -11  -8   57.35    5.28
  11 -11   8  121.34    7.27
  11 -11  -8  133.84    7.32
  11  11  -8  140.12    7.88
   0 -12  -8  149.76    5.71
   0  12   8  129.05    9.23
   0  12  -8  133.20    8.68
   1  12  -8  123.38    8.63
  -1 -12  -8  112.11    4.81
   1 -12  -8  116.30    5.20
   1  12   8  119.35    8.59
  -1  12   8  103.65    7.65
  -1  12  -8  107.92    7.96
  -2  12  -8  599.32   15.55
   2  12   8  573.62   17.33
  -2  12   8  581.78   15.75
   2 -12  -8  596.03   13.05
   2  12  -8  592.16   16.62
  -2 -12  -8  619.08   12.38
   3 -12  -8  184.75    6.91
   3 -12   8  194.60    8.49
   3  12  -8  186.37   10.07
  -3  12   8  185.82    8.75
   3  12  -8  177.88    6.29
   3  12   8  193.73   11.22
  -3 -12  -8  188.10    5.86
   3 -12  -8  187.80    5.59
   4 -12   8   57.96    5.26
   4  12   8   58.32    7.86
  -4  12   8   53.66    5.54
   4 -12  -8   59.25    3.97
   4  12  -8   50.74    4.43
   4  12  -8   48.47    6.81
   5  12   8   24.79    7.05
   5 -12  -8   17.50    3.20
   5  12  -8   16.39    6.22
   5 -12   8   20.17    3.96
   5  12  -8   23.88    3.77
   6 -12   8   38.46    4.27
   6  12   8   43.61    8.15
   6  12  -8   35.53    6.85
   6  12  -8   39.14    4.37
   6 -12  -8   37.50    3.69
   7  12   8   24.44    7.72
   7  12  -8   21.87    6.70
   7  12  -8   28.37    4.22
   7 -12  -8   19.84    3.71
   7 -12   8   15.90    3.69
   8 -12  -8  236.81    8.00
   8  12   8  266.39   14.00
   8 -12   8  231.71    8.25
   8  12  -8  244.19   12.12
   8  12  -8  219.91    8.38
   9  12   8    8.87    8.01
   9  12  -8   19.56    7.05
   9 -12   8   22.64    4.41
   9 -12  -8   15.44    4.07
   9  12  -8   25.39    4.84
  10 -12  -8  120.61    6.71
  10  12   8  130.20   11.66
  10  12  -8  100.48    7.31
  10 -12   8  101.76    6.33
  11  12  -8   11.63    5.23
  11 -12   8   -0.03    4.28
  11 -12  -8    1.43    4.26
   0  13  -8   -3.12    4.72
   0  13   8    1.80    5.41
   0 -13  -8    0.91    2.88
   1 -13  -8  137.30    5.74
  -1  13  -8  140.14    8.79
   1  13   8  128.61    9.15
  -1 -13  -8  150.36    5.71
  -1  13   8  150.12    9.36
   1  13  -8  133.02    9.13
   2 -13  -8  273.49    8.08
   2  13   8  256.06   12.34
  -2  13   8  268.85   10.92
  -2  13  -8  260.60   10.65
   2  13  -8  256.05   11.43
  -2 -13  -8  266.33    7.39
   3  13  -8  243.16   11.53
   3 -13  -8  264.26    6.79
   3  13   8  252.94   12.65
   3 -13   8  247.85    9.81
  -3  13   8  247.74   10.26
   3 -13  -8  246.56    8.12
   3  13  -8  259.76    7.68
   4  13   8   37.85    7.64
  -4  13   8   36.56    5.35
   4 -13   8   42.21    5.11
   4  13  -8   39.03    7.02
   4 -13  -8   35.62    3.39
   4  13  -8   32.92    3.99
   5 -13  -8   72.10    4.67
   5  13   8   81.09    9.19
   5 -13   8   74.02    5.59
   5  13  -8   68.02    7.87
   5  13  -8   65.33    5.00
   6 -13   8  166.58    7.40
   6 -13  -8  173.98    6.29
   6  13  -8  168.75    6.94
   6  13  -8  163.07   10.56
   6  13   8  184.06   12.32
   7  13  -8  318.12   13.89
   7 -13  -8  356.27    9.52
   7  13   8  374.21   15.98
   7  13  -8  364.71   10.25
   7 -13   8  362.40   10.19
   8  13  -8  141.49   10.53
   8 -13  -8  133.33    6.32
   8 -13   8  126.87    6.33
   8  13  -8  146.62    7.12
   8  13   8  126.90   11.35
   9 -13  -8   17.19    4.04
   9 -13   8   14.78    4.34
   9  13  -8   16.95    7.01
   9  13  -8   16.28    4.67
   9  13   8   19.01    8.52
  10  13  -8   10.70    4.84
  10 -13  -8    1.77    3.90
  10 -13   8    4.48    4.23
  10  13   8   -9.27    8.04
   0  14   8   65.77    7.77
   0 -14  -8   70.56    4.65
   0  14  -8   57.47    6.95
   1  14  -8  303.86   12.33
   1 -14  -8  304.15    8.52
  -1  14   8  287.45   12.07
   1  14   8  289.92   13.22
  -1  14  -8  295.07   11.85
  -1 -14  -8  320.27    8.44
   2  14  -8   25.93    6.24
  -2  14   8   24.37    5.79
   2 -14  -8   25.63    3.88
   2  14   8   20.42    6.88
  -2  14  -8   22.54    5.56
   3  14   8  193.69   11.99
   3  14  -8  187.15   10.85
   3 -14  -8  190.34    7.34
  -3  14   8  183.09    9.63
   4  14  -8    7.03    3.67
  -4  14   8   -3.30    4.51
   4  14  -8   15.53    6.34
   4  14   8   -1.23    6.56
   4 -14  -8    4.14    3.88
   4 -14   8    8.44    4.32
   4 -14  -8    7.64    2.91
   5  14   8  323.66   15.04
   5 -14   8  340.32   10.70
   5  14  -8  343.06   13.90
   5 -14  -8  338.45    8.69
   5  14  -8  324.96    9.57
   6 -14   8   63.16    5.41
   6  14  -8   65.65    5.13
   6  14  -8   59.75    8.22
   6  14   8   61.64    9.22
   6 -14  -8   76.23    5.02
   7 -14   8    5.52    3.61
   7  14   8    4.05    7.69
   7  14  -8    8.54    6.84
   7  14  -8    5.71    4.22
   7 -14  -8    2.95    3.18
   8  14  -8  223.46   12.57
   8  14  -8  226.96    8.96
   8  14   8  205.41   13.84
   8 -14  -8  242.35    8.10
   8 -14   8  235.20    8.57
   9  14   8   28.86    9.20
   9  14  -8   36.23    7.77
   9 -14  -8   24.55    4.34
   9 -14   8   27.32    4.75
   9  14  -8   32.11    5.26
  10  14  -8   15.77    5.21
  10 -14   8   10.83    4.47
  10 -14  -8    3.05    4.19
  10  14   8   -2.17    8.44
   0  15   8   -3.67    5.63
   0 -15  -8   -3.65    3.24
   0  15  -8   -1.06    5.34
  -1  15  -8  119.62    9.08
   1 -15  -8  120.57    5.71
  -1  15   8  129.41    9.24
   1  15   8  120.31    9.74
   1  15  -8  118.55    8.94
   2 -15  -8   34.35    4.32
   2  15  -8   35.86    6.98
  -2  15  -8   41.30    6.34
   2  15   8   25.91    7.41
  -2  15   8   39.59    6.63
  -3  15   8   24.20    5.98
   3  15  -8   17.96    6.58
   3  15   8   24.96    7.43
   3 -15  -8   17.60    3.98
   4  15  -8   37.30    7.41
   4 -15   8   44.59    5.68
   4  15   8   20.58    7.66
   4  15  -8   34.99    4.21
   4 -15  -8   42.68    4.82
  -4  15   8   27.41    5.82
   5  15  -8   12.35    3.93
   5 -15   8    9.46    4.35
   5  15   8   17.83    7.88
   5  15  -8   15.46    6.80
   6  15  -8    2.44    6.83
   6  15   8    1.67    7.61
   6  15  -8   13.05    4.43
   7 -15  -8   13.55    3.64
   7  15   8   19.68    8.50
   7  15  -8   13.20    4.39
   7  15  -8   19.12    7.50
   7 -15   8    8.66    3.89
   8  15  -8    3.77    4.45
   8  15   8   -1.19    7.98
   8  15  -8    9.74    7.55
   8 -15   8   -6.45    3.54
   8 -15  -8    0.50    3.52
   9  15  -8   -1.82    4.65
   9  15  -8   10.52    7.26
   9 -15   8    2.98    3.87
   9  15   8    3.70    8.35
   9 -15  -8    3.79    3.79
   0  16  -8  382.02   14.22
   0  16   8  350.52   14.35
   1  16   8  195.90   11.87
  -1  16   8  195.78   11.19
   1  16  -8  176.13   10.91
  -1  16  -8  189.51   10.68
   2  16  -8    1.51    5.77
  -2  16  -8   -3.35    5.16
   2 -16  -8    6.40    3.55
   2  16   8    3.94    6.86
  -2  16   8   -3.58    5.32
   3  16  -8  278.92   12.98
  -3  16   8  286.16   12.07
   3  16   8  251.94   13.72
   3 -16  -8  253.78    8.77
  -4  16   8   32.44    6.27
   4  16  -8   34.09    7.57
   4 -16   8   44.19    5.94
   4  16   8   33.90    8.25
   4 -16  -8   37.53    5.08
   5  16  -8  307.30    9.42
   5 -16  -8  309.84   10.34
   5  16   8  311.03   15.32
   5 -16   8  313.26   11.06
   5  16  -8  281.82   13.64
   6  16   8   77.24   10.24
   6  16  -8   89.28    6.06
   6  16  -8   88.03    9.72
   7  16  -8   27.50    7.98
   7 -16   8   42.69    4.89
   7  16   8   25.82    8.96
   7  16  -8   38.44    5.49
   8  16   8    5.02    8.56
   8  16  -8   13.17    7.71
   8  16  -8   10.45    5.06
   8 -16   8   19.93    4.41
   9  16   8   11.74    9.05
   9 -16   8   14.74    4.46
   9  16  -8   16.80    8.03
   0  17   8   -5.11    6.26
   0  17  -8    4.77    6.02
  -1  17   8  238.39   12.33
   1  17   8  225.91   12.74
  -1  17  -8  262.99   12.11
   1  17  -8  229.54   12.17
   2  17   8   44.18    8.45
   2  17  -8   38.59    7.40
  -2  17  -8   35.25    6.92
  -2  17   8   54.32    7.54
  -3  17   8  179.48   10.87
   3 -17  -8  178.35    7.62
   3  17  -8  157.30   10.99
   3  17   8  186.07   12.52
   4  17  -8  111.52    9.94
   4 -17   8   99.38    7.75
   4 -17  -8  118.28    6.81
   4  17   8  117.86   11.15
   5 -17   8   -6.55    4.29
   5  17  -8    0.60    6.63
   5  17   8   -3.85    7.51
   5 -17  -8   -3.75    4.19
   6  17  -8    6.69    4.24
   6  17  -8    3.94    7.06
   6 -17  -8    9.51    4.88
   6  17   8    5.92    8.35
   7  17   8   17.84    8.78
   7  17  -8    3.23    7.07
   7 -17   8    4.15    3.77
   8  17   8    1.07    8.63
   8 -17   8    0.89    4.04
   8  17  -8   15.26    7.76
   0  18   8  175.79   11.75
   0  18  -8  162.30   10.97
   1  18   8   62.73    8.94
  -1  18  -8   63.77    8.09
  -1  18   8   70.78    8.66
   1  18  -8   54.36    8.08
   2  18  -8   -4.34    6.38
  -2  18  -8   20.13    6.69
   2  18   8   12.92    7.61
  -2  18   8    9.60    6.62
   3  18  -8    8.66    6.74
   3  18   8   23.22    8.10
  -3  18   8   10.15    6.61
   4  18  -8   36.26    8.14
   4 -18  -8   53.00    5.52
   4 -18   8   50.10    6.71
   4  18   8   57.57    9.67
   5  18   8   93.24   11.10
   5  18  -8   90.81    9.96
   5 -18   8   72.57    7.06
   5 -18  -8   88.79    6.69
   6 -18  -8  340.64   11.88
   6  18   8  334.89   16.99
   7 -18   8   76.96    5.91
   7  18   8   83.13   11.47
   7 -18  -8   91.82    7.47
   7  18  -8   78.26    9.90
   0  19  -8  -14.75    5.58
   0  19   8   -6.81    6.58
   1  19  -8  148.58   11.13
  -1  19   8  140.67   10.91
   1  19   8  146.37   11.68
  -1  19  -8  140.27   10.70
   2  19  -8   36.26    8.03
  -2  19  -8   39.57    7.56
   2  19   8   49.15    9.16
  -2  19   8   45.35    8.20
   3  19  -8  216.09   12.76
   3  19   8  224.34   13.99
   3 -19   8  217.47   11.37
  -3  19   8  220.44   12.46
   4  19   8   -6.15    7.32
   4  19  -8    5.44    7.15
   4 -19   8    6.70    5.59
   5  19  -8  350.58   16.13
   5  19   8  383.43   17.85
   6 -19  -8   65.33    6.87
   6  19   8   82.91   11.39
   6  19  -8   58.93    9.62
   0  20  -8  161.15   11.54
   0  20   8  163.75   12.21
  -1  20   8   51.08    8.76
  -1  20  -8   31.92    7.71
   1  20   8   46.11    8.99
   1  20  -8   49.36    8.51
  -2  20  -8    7.19    6.67
  -2  20   8    6.93    7.22
   2  20   8   10.67    8.06
   2  20  -8    1.09    6.89
   3  20  -8  215.73   13.07
   3  20   8  226.58   14.52
  -3  20   8  214.19   12.65
   3 -20   8  208.14   11.53
   4 -20   8   92.22    8.30
   4  20  -8   82.53    9.90
   4  20   8   97.13   11.37
   0  21   8   -6.93    7.11
   0  21  -8    2.98    6.99
  -1  21   8   89.10   10.53
  -1  21  -8  103.31   10.09
   1  21   8   93.30   10.82
   1  21  -8   69.03    9.55
   2  21  -8   79.17    9.78
  -2  21   8   77.41   10.14
   2  21   8   69.44   10.47
   0   0   9    2.59    1.97
   1   0   9   -0.20    2.20
   1   0  -9   -0.86    1.48
  -1   0   9   -0.56    1.67
   1   0  -9    0.61    1.51
   2   0  -9   -0.53    1.75
   2   0  -9   -0.83    1.63
   2   0   9    2.02    2.62
  -2   0   9    2.65    1.47
   3   0   9   -2.80    2.66
   3   0  -9   -1.29    1.84
   3   0   9    2.33    1.84
  -3   0   9   -1.35    1.31
  -4   0   9   -3.57    1.27
   4   0   9   -1.45    1.80
   4   0  -9   -1.48    1.76
   4   0   9   -3.46    2.87
   5   0   9   -0.16    2.03
   5   0   9   -4.72    3.00
   5   0  -9   -2.08    1.47
   5   0  -9   -2.13    1.93
   6   0   9    1.27    2.27
   6   0  -9    1.79    2.56
   6   0   9   -3.82    3.19
   7   0  -9    2.33    2.48
   7   0   9   -1.22    2.47
   7   0   9   -0.32    3.83
   8   0   9   -1.34    2.64
   8   0  -9   -4.76    2.92
   8   0   9    2.94    4.34
   9   0  -9    3.32    3.33
   9   0   9    0.33    3.07
  10   0  -9    0.51    3.16
  10   0   9    2.36    3.34
  11   0  -9   -1.87    3.80
  11   0   9    4.81    3.71
  12   0   9   -0.35    4.06
  12   0  -9    8.38    4.35
  13   0  -9   -4.30    4.43
  13   0   9    0.81    4.46
   0  -1  -9   -0.41    1.06
   0  -1   9   -1.36    1.77
   0   1   9   -0.07    2.23
   0  -1  -9    1.82    1.77
   0   1  -9   -1.22    1.46
   0   1  -9    0.56    1.52
   1   1   9  934.41   16.55
  -1   1   9  919.04   15.61
   1  -1  -9  903.12   15.78
   1   1  -9  926.49   15.56
   1  -1   9  900.36   15.85
   1   1  -9  907.89   15.12
   1  -1  -9  904.89   14.81
  -1  -1   9  922.84   15.51
   2   1  -9  218.93    5.03
  -2   1   9  226.13    4.88
   2  -1  -9  218.39    5.48
   2   1   9  216.35    4.55
   2  -1   9  223.90    6.21
   2  -1  -9  219.99    4.86
   2   1   9  217.49    6.94
  -2  -1   9  214.50    5.14
   2   1  -9  216.29    4.92
   3  -1   9    0.46    2.41
   3   1   9   -2.66    3.08
   3   1   9   -1.52    1.48
   3   1  -9    2.10    1.97
   3  -1  -9    0.03    1.81
   4   1  -9 2719.27   42.94
   4  -1  -9 2665.42   42.75
   4   1   9 2676.80   44.94
   4  -1   9 2683.20   42.75
   4   1  -9 2702.23   43.03
   4  -1   9 2648.18   44.14
   4   1   9 2685.52   42.56
   5  -1  -9  211.23    5.87
   5   1   9  210.33    5.52
   5  -1   9  206.83    7.02
   5   1  -9  207.37    5.96
   5   1  -9  209.97    5.60
   5  -1   9  214.24    5.74
   5   1   9  195.30    7.96
   6   1  -9  673.41   13.18
   6   1   9  658.60   15.14
   6   1   9  664.69   12.82
   6  -1   9  658.41   14.40
   6   1  -9  685.36   12.59
   6  -1   9  663.30   12.88
   6  -1  -9  665.99   13.13
   7  -1  -9  345.91    8.62
   7   1  -9  356.47    8.86
   7   1   9  377.01   11.20
   7  -1   9  380.14   10.44
   7   1   9  355.63    8.52
   7  -1   9  342.59    8.60
   8   1   9    0.75    2.76
   8  -1  -9    3.38    3.14
   8  -1   9    0.83    4.09
   8  -1   9    0.16    2.85
   8   1  -9    0.86    3.01
   8   1   9    3.48    4.50
   9  -1   9   25.82    3.72
   9  -1  -9   26.98    4.01
   9   1  -9   30.40    3.78
   9   1   9   26.52    5.76
   9   1   9   29.24    3.82
  10  -1   9   11.87    3.74
  10   1  -9   10.71    3.90
  10  -1  -9   17.87    3.69
  10   1   9   19.51    3.86
  11  -1  -9  176.60    7.64
  11   1   9  186.69    7.51
  11   1  -9  186.58    7.54
  11  -1   9  187.81    7.60
  12  -1  -9    6.95    4.38
  12   1   9    2.20    4.06
  12   1  -9   -0.76    4.24
  12  -1   9    2.81    4.10
  13  -1  -9   26.32    5.17
  13   1  -9   37.24    5.49
  13   1   9   27.71    5.07
  13  -1   9   26.14    4.97
   0  -2  -9   73.51    1.91
   0  -2  -9   77.16    3.21
   0   2  -9   70.81    3.05
   0  -2   9   83.12    3.97
   0   2   9   64.39    4.99
   1   2  -9 1952.77   31.27
   1  -2   9 1948.98   32.04
   1   2  -9 1978.54   32.13
   1  -2  -9 1966.77   30.85
  -1  -2  -9 1945.98   32.58
   1  -2  -9 1941.89   32.54
   1   2   9 1995.86   33.06
  -1   2   9 1974.88   32.23
  -1  -2   9 1989.04   32.07
  -2   2   9  187.79    5.01
   2   2   9  181.38    3.92
   2   2  -9  187.97    4.22
   2  -2  -9  187.95    4.40
   2   2   9  179.21    7.29
   2  -2  -9  185.68    5.01
   2   2  -9  179.74    4.55
   2  -2   9  188.89    5.39
   3   2  -9 1678.86   27.72
   3   2  -9 1678.76   28.30
   3  -2  -9 1729.77   27.50
   3   2   9 1669.37   29.94
   3  -2   9 1710.58   28.51
   3   2   9 1744.16   27.19
   4  -2  -9  142.11    4.25
   4   2  -9  133.24    4.66
   4   2   9  134.82    7.02
   4   2  -9  144.77    5.32
   4   2   9  142.25    4.08
   4  -2   9  136.94    5.37
   4  -2   9  145.09    4.63
   5  -2   9  319.99    7.29
   5  -2  -9  313.69    7.38
   5   2  -9  329.62    7.90
   5   2   9  313.85    9.91
   5   2   9  316.74    7.13
   5   2  -9  307.86    7.35
   5  -2   9  307.52    8.33
   6  -2  -9  154.92    5.39
   6  -2   9  159.47    6.49
   6   2   9  173.26    7.99
   6   2  -9  148.74    5.26
   6   2   9  158.52    5.12
   6   2  -9  154.50    5.85
   6  -2   9  146.61    5.27
   7   2   9  116.61    7.66
   7  -2   9  117.36    4.85
   7  -2  -9  130.07    5.41
   7  -2   9  132.24    6.54
   7   2  -9  128.68    5.50
   7   2   9  116.96    4.86
   8  -2   9  137.18    7.42
   8  -2  -9  141.39    6.01
   8   2  -9  139.64    6.07
   8  -2   9  148.72    5.90
   8   2   9  150.07    5.66
   8   2   9  157.69    8.78
   9  -2   9  365.77    9.75
   9  -2  -9  372.84    9.88
   9   2   9  354.42    9.40
   9   2   9  358.96   12.46
  10  -2  -9  174.34    7.15
  10   2  -9  181.13    7.33
  10  -2   9  175.11    7.01
  10   2   9  163.30    6.70
  11  -2   9    1.78    3.83
  11  -2  -9    3.57    3.90
  11   2  -9   -3.69    3.36
  11   2   9    1.41    3.76
  12  -2  -9  133.66    7.29
  12   2  -9  136.57    7.43
  12  -2   9  143.85    7.33
  12   2   9  134.67    7.05
  13   2   9   13.04    4.63
  13  -2  -9    9.65    4.67
  13  -2   9   19.29    4.47
  13   2  -9   11.03    4.56
   0  -3   9    2.52    2.33
   0  -3  -9   -0.11    1.71
   0   3   9   -1.94    3.07
   1   3  -9   99.49    3.42
  -1  -3   9  104.28    4.77
   1   3   9   98.07    6.17
   1  -3  -9  104.62    2.67
  -1   3   9   93.04    5.22
   1  -3   9  101.02    4.34
   1  -3  -9  108.14    3.81
  -1  -3  -9  103.63    3.70
   2   3  -9    9.53    2.83
  -2   3   9   18.65    2.67
   2  -3  -9   16.95    1.76
   2   3   9   15.42    1.34
   2   3   9   16.03    3.86
   2   3  -9   14.87    1.96
   2   3  -9   13.93    1.35
   3  -3  -9   88.92    3.58
   3  -3   9   89.61    4.20
  -3   3   9   89.39    3.63
   3   3  -9   95.31    5.15
   3   3  -9   96.26    3.64
   3   3   9   95.33    3.11
   3   3   9   91.28    6.67
   4   3   9   80.75    5.56
   4  -3   9   67.11    4.24
   4   3   9   69.72    3.00
   4  -3  -9   72.11    3.53
   4   3  -9   72.09    3.52
   4   3  -9   68.71    5.07
   5  -3   9  113.31    5.05
   5  -3  -9  114.86    4.48
   5   3  -9  114.78    5.73
   5   3  -9  114.19    4.70
   5   3   9  114.21    7.24
   5  -3   9  119.46    4.62
   5   3   9  118.45    4.04
   6  -3  -9   62.91    4.06
   6   3  -9   66.77    4.52
   6   3   9   57.78    5.71
   6   3   9   55.72    3.58
   6  -3   9   63.70    4.23
   6   3  -9   60.97    4.25
   6  -3   9   63.29    4.04
   7  -3  -9  102.26    4.99
   7   3   9  102.49    7.13
   7   3  -9  100.86    5.98
   7  -3   9   99.63    4.88
   7  -3   9  109.12    6.08
   7   3   9  114.11    4.90
   7   3  -9  103.98    4.88
   8  -3   9   23.68    4.30
   8  -3  -9   22.24    3.54
   8  -3   9   20.45    3.42
   8   3   9   19.56    5.55
   8   3  -9   15.49    3.67
   9   3  -9    4.18    3.26
   9  -3   9   -0.22    3.17
   9  -3  -9    0.67    3.32
   9   3   9    7.26    3.47
   9   3   9    6.91    5.42
  10  -3  -9   86.06    5.78
  10  -3   9  101.27    5.88
  10   3   9   94.47    5.59
  10   3  -9   92.54    6.01
  11   3  -9   15.71    4.44
  11   3   9   18.01    4.13
  11  -3   9   12.32    3.73
  11  -3  -9    4.81    3.66
  12  -3   9   28.14    4.82
  12   3  -9   34.45    5.19
  12   3   9   32.22    4.81
  12  -3  -9   23.05    4.88
  13  -3  -9    6.46    4.66
  13   3   9   -5.79    4.12
  13   3  -9    2.74    4.72
  13  -3   9    5.24    4.57
   0  -4   9   18.74    2.92
   0   4   9   25.87    3.81
   0  -4  -9   21.00    2.19
  -1  -4  -9   90.74    3.86
  -1   4   9   77.20    5.58
   1  -4   9   80.88    4.59
   1   4  -9   77.24    5.13
   1   4  -9   81.47    3.29
   1  -4  -9   80.07    3.56
   1   4   9   82.60    6.30
   1  -4  -9   79.49    2.46
   2   4   9  503.56   12.65
   2   4  -9  518.50   11.55
   2  -4  -9  516.73   10.48
   2   4   9  524.83    8.78
   2  -4   9  522.08   10.57
  -2   4   9  521.99   10.87
   2   4  -9  539.36    9.07
   2   4  -9  515.41    9.88
   2  -4  -9  553.23    9.31
   3  -4  -9 1008.40   16.92
   3   4  -9 1004.17   17.40
  -3   4   9 1012.62   17.48
   3   4   9 1018.43   16.51
   3   4  -9 1008.01   19.03
   3   4   9  994.79   20.33
   3  -4   9  998.16   17.85
   4  -4   9   16.11    2.49
   4  -4  -9   14.13    2.25
   4   4   9   11.11    1.89
   4   4  -9    6.40    3.31
   4   4  -9   11.57    2.47
   4   4   9   12.22    4.46
   5   4  -9   -2.66    3.25
   5   4   9    0.17    4.14
   5   4  -9   -0.33    2.42
   5  -4  -9    3.11    2.17
   5  -4   9    4.24    2.36
   5  -4   9    0.43    2.33
   5   4   9   -0.13    2.00
   6   4   9  107.58    7.96
   6  -4   9  114.41    4.71
   6   4  -9  127.94    5.21
   6  -4   9  126.42    5.55
   6  -4  -9  112.61    4.83
   6   4   9  124.10    4.47
   6   4  -9  121.56    6.52
   7   4  -9  176.37    7.49
   7  -4   9  177.19    6.18
   7   4  -9  169.32    6.31
   7  -4   9  162.62    6.81
   7  -4  -9  167.61    6.02
   7   4   9  180.56    5.88
   7   4   9  175.66    9.27
   8   4   9  112.66    8.72
   8  -4  -9  114.04    5.57
   8   4  -9  123.85    5.96
   8  -4   9  119.42    5.73
   8  -4   9  135.26    6.78
   8   4   9  123.44    5.28
   9   4   9    4.43    3.18
   9  -4   9   -0.51    3.24
   9  -4  -9    3.33    3.44
   9   4  -9    3.90    3.64
   9   4   9    4.35    5.71
  10   4  -9  155.08    6.75
  10   4   9  147.96    6.42
  10  -4  -9  153.09    6.85
  10  -4   9  155.39    6.85
  11   4   9   69.80    5.28
  11  -4   9   57.79    4.98
  11   4  -9   65.95    5.72
  11  -4  -9   53.58    5.24
  12  -4  -9   63.73    5.52
  12   4   9   60.89    5.46
  12  -4   9   70.45    5.96
  12   4  -9   62.31    6.01
  13  -4   9   38.79    5.51
  13  -4  -9   34.37    5.31
  13   4   9   31.41    5.22
  13   4  -9   28.52    5.42
   0   5   9   -1.16    3.51
   0  -5  -9   -2.78    1.99
  -1   5   9  483.88   11.53
   1  -5  -9  484.98    9.81
   1  -5  -9  506.87    8.37
  -1  -5  -9  481.41    9.67
   1   5  -9  488.17    9.49
   1   5   9  478.85   12.41
   1  -5   9  486.82   10.76
   1   5  -9  478.22   11.21
   2   5   9  374.37   11.14
   2  -5   9  367.84    8.70
   2  -5  -9  384.55    7.09
   2   5   9  368.44    6.54
  -2  -5  -9  386.56    8.04
   2   5  -9  385.39    7.99
   2   5  -9  373.13    9.89
  -2   5   9  369.42    9.25
   2  -5  -9  362.80    8.28
   3   5  -9  305.58    5.68
  -3   5   9  320.64    7.78
   3   5   9  312.28    6.09
   3   5  -9  320.55    9.23
   3  -5   9  321.86    7.63
   3   5   9  307.26   10.30
   3   5  -9  306.71    7.18
   3  -5  -9  321.13    6.66
  -4   5   9  109.25    3.95
   4  -5  -9  101.42    3.93
   4  -5   9  103.75    4.50
   4   5  -9  105.76    4.17
   4   5   9  103.13    3.45
   4   5   9  109.67    7.55
   4   5  -9  113.98    6.34
   5   5   9  405.75    8.23
   5   5  -9  393.77   10.82
   5  -5  -9  398.04    8.68
   5   5   9  409.90   12.47
   5   5  -9  399.81    8.94
   5  -5   9  393.98    9.10
   6   5  -9  237.24    6.86
   6  -5   9  241.71    7.16
   6  -5   9  248.07    7.04
   6  -5  -9  247.20    6.82
   6   5   9  246.65    6.38
   6   5  -9  241.90    8.75
   6   5   9  238.11   10.32
   7   5  -9    3.61    4.16
   7   5   9   15.40    2.81
   7  -5   9   15.81    3.22
   7   5   9   14.54    5.42
   7   5  -9   16.89    3.44
   7  -5   9   16.29    3.38
   7  -5  -9   15.20    3.11
   8  -5  -9  336.41    8.92
   8  -5   9  357.99    9.21
   8   5  -9  342.07    9.46
   8   5   9  349.10    8.74
   8   5   9  349.19   12.89
   9   5   9   68.96    7.64
   9   5   9   72.93    5.11
   9  -5  -9   60.47    4.70
   9  -5   9   59.92    4.78
   9   5  -9   72.00    5.23
  10  -5  -9   -0.18    3.61
  10  -5   9    1.39    3.50
  10   5   9    8.79    3.86
  10   5  -9    1.22    3.81
  11   5  -9  170.73    7.56
  11  -5   9  175.53    7.77
  11  -5  -9  179.27    7.71
  11   5   9  196.25    7.54
  12  -5  -9  168.81    8.05
  12   5  -9  184.80    8.39
  12   5   9  167.35    7.70
  12  -5   9  181.76    7.79
  13  -5  -9   11.02    4.80
  13   5   9   -4.20    4.38
  13   5  -9   13.28    5.08
  13  -5   9   10.14    4.74
   0   6   9  284.46    9.47
   0   6  -9  266.89    8.29
   0  -6  -9  277.08    6.71
   1  -6  -9  964.23   15.26
   1   6  -9  930.54   18.48
   1   6  -9  924.04   16.37
  -1   6   9  912.72   18.53
   1  -6   9  930.59   17.95
   1  -6  -9  942.18   16.99
  -1  -6  -9  944.43   16.85
   1   6   9  915.44   19.48
   2  -6  -9    3.45    1.50
  -2   6   9    1.87    3.18
   2   6   9    4.87    1.23
   2   6   9    4.93    4.18
   2   6  -9   -0.71    2.08
   2  -6   9    0.21    2.56
   2   6  -9    3.48    3.54
  -2  -6  -9    3.24    1.98
   2  -6  -9    5.73    2.16
   3   6  -9    7.78    2.41
   3  -6   9   10.02    2.54
  -3   6   9   11.07    2.98
   3   6  -9   12.27    3.89
   3   6   9    8.48    4.56
   3  -6  -9    7.68    1.89
   3   6   9    9.73    1.53
   4   6   9   84.07    3.16
   4   6  -9   93.90    6.48
   4   6  -9   94.33    4.34
   4   6   9   99.61    6.98
   4  -6   9   91.94    4.50
  -4   6   9   83.51    4.35
   4  -6  -9   87.70    3.69
   5   6   9  393.17   12.86
   5   6  -9  420.20    9.53
   5  -6   9  420.85    9.56
   5  -6  -9  426.28    9.20
   5   6  -9  433.24   11.73
   5   6   9  422.57    8.54
   6   6   9   37.61    6.04
   6  -6   9   28.02    3.33
   6  -6  -9   25.73    3.08
   6  -6   9   28.22    3.26
   6   6  -9   26.11    4.81
   6   6  -9   30.36    3.42
   6   6   9   34.94    2.95
   7   6   9   33.55    3.37
   7   6  -9   34.92    3.91
   7   6  -9   22.11    4.99
   7  -6   9   34.29    3.67
   7  -6  -9   34.23    3.62
   7  -6   9   32.87    3.69
   7   6   9   34.97    6.36
   8  -6  -9  201.19    7.09
   8   6  -9  219.61    7.61
   8   6   9  212.19   11.01
   8  -6   9  212.52    7.11
   8   6   9  218.76    6.91
   9   6   9  178.36    6.55
   9   6   9  173.68   10.83
   9  -6   9  187.84    7.21
   9   6  -9  171.35    6.88
   9  -6  -9  173.58    6.87
  10  -6   9   22.17    4.25
  10   6   9   23.64    7.10
  10  -6  -9   23.91    4.23
  10   6  -9   31.87    4.72
  10   6   9   26.15    4.10
  11  -6   9   17.22    3.97
  11  -6  -9   14.26    3.85
  11   6   9   18.36    4.25
  11   6  -9   17.00    4.84
  12  -6   9  115.70    7.02
  12   6   9  119.26    6.87
  12  -6  -9  128.28    7.21
  12   6  -9  127.48    7.57
   0   7  -9   -0.32    3.18
   0   7   9   -1.34    3.82
   0  -7  -9    1.02    2.08
  -1   7   9  193.61    7.95
   1   7  -9  177.33    5.32
   1  -7  -9  187.99    5.67
  -1  -7  -9  184.04    5.33
   1   7  -9  188.29    7.73
   1   7   9  177.50    8.76
   2  -7  -9  593.17   10.31
   2   7   9  578.96    9.79
   2   7  -9  572.22   13.81
   2  -7   9  566.30   12.61
   2   7   9  553.75   14.87
  -2  -7  -9  567.35   11.32
   2  -7  -9  578.90   11.88
   2   7  -9  565.59   11.14
  -2   7   9  570.53   13.18
   3   7   9    7.52    1.59
   3   7  -9    8.99    4.05
   3   7   9    8.12    4.86
  -3   7   9    6.91    3.20
   3   7  -9   10.83    2.49
   3  -7   9   10.36    2.77
   3  -7  -9    9.89    1.95
   4   7   9  150.84    4.17
  -4   7   9  148.97    5.77
   4   7  -9  152.18    7.62
   4   7   9  139.73    8.79
   4  -7  -9  144.88    4.58
   4   7  -9  149.77    5.04
   4  -7   9  151.44    5.61
   5   7  -9  182.63    6.03
   5   7   9  184.51    9.77
   5   7  -9  174.45    8.55
   5  -7  -9  180.38    5.62
  -5   7   9  185.72    5.41
   5   7   9  176.96    4.94
   5  -7   9  181.56    6.08
   6   7  -9   48.34    3.95
   6  -7   9   56.72    3.80
   6   7   9   50.60    3.57
   6  -7  -9   39.94    3.46
   6  -7   9   47.34    3.61
   6   7   9   53.98    6.87
   6   7  -9   49.63    5.70
   7  -7   9    5.77    2.90
   7   7   9    0.42    5.63
   7   7  -9    9.45    5.01
   7   7   9    9.97    2.86
   7  -7  -9    8.25    2.96
   7  -7   9    9.26    3.05
   7   7  -9   10.43    3.46
   8   7   9  410.55   14.86
   8   7  -9  427.93   13.09
   8   7   9  394.96    9.73
   8  -7   9  422.93   10.70
   8  -7  -9  421.84   10.44
   9   7   9    0.63    3.34
   9  -7   9   -1.33    3.30
   9  -7  -9    2.17    3.40
   9   7   9   -1.92    6.26
   9   7  -9   -1.46    3.62
  10  -7   9   75.96    5.67
  10   7  -9   77.79    5.76
  10   7   9   83.24    5.45
  10  -7  -9   74.46    5.53
  10   7   9   77.14    9.04
  11   7  -9   30.00    5.09
  11  -7  -9   32.69    4.67
  11   7   9   34.42    4.75
  11  -7   9   36.00    4.81
  12   7   9    7.63    4.29
  12  -7  -9   10.11    4.46
  12   7  -9    0.12    4.63
  12  -7   9    2.01    4.19
   0   8  -9    3.21    3.56
   0  -8  -9   -0.53    2.11
   0   8   9    2.15    4.11
   1   8  -9  668.89   15.29
   1   8   9  622.52   15.92
   1  -8  -9  653.26   12.94
  -1  -8  -9  659.55   12.65
  -1   8   9  607.51   15.07
  -1   8  -9  678.99   14.86
   2  -8   9   90.94    5.65
   2   8  -9   91.29    6.17
   2   8  -9  102.20    4.38
   2   8   9   97.36    2.94
   2  -8  -9   93.50    3.46
  -2   8   9   89.25    6.63
   2   8   9   90.58    6.95
   2  -8  -9   93.97    4.39
  -2  -8  -9   95.39    4.30
   3   8  -9  156.80    8.22
   3   8   9  145.14    9.00
   3   8   9  152.73    4.00
   3  -8   9  157.66    6.30
   3   8  -9  147.79    5.25
   3  -8  -9  147.31    4.51
  -3   8   9  146.69    6.82
   4  -8   9   61.03    4.54
   4   8   9   58.46    6.74
   4   8  -9   55.17    4.06
   4   8   9   53.39    2.91
   4   8  -9   60.12    5.79
  -4   8   9   67.95    4.98
   4  -8  -9   58.86    3.36
   5   8  -9    6.42    2.83
   5   8  -9    3.15    4.56
   5   8   9    3.14    5.46
  -5   8   9    5.72    2.48
   5  -8  -9    3.41    2.23
   5   8   9    6.61    2.01
   5  -8   9    5.85    2.65
   6  -8  -9    1.24    2.49
   6   8  -9    7.38    2.77
   6   8  -9   -2.06    4.54
   6  -8   9   -1.67    2.36
   6  -8   9    5.70    2.70
   6   8   9    3.43    5.67
   6   8   9    4.81    2.34
   7   8   9  251.21    6.79
   7   8  -9  248.52   10.61
   7  -8   9  246.19    7.72
   7   8  -9  252.49    7.86
   7  -8  -9  244.16    7.37
   7  -8   9  256.16    7.86
   7   8   9  227.46   11.83
   8  -8   9   30.97    4.10
   8   8  -9   33.98    6.27
   8   8  -9   32.13    4.28
   8   8   9   25.52    7.00
   8   8   9   31.41    3.46
   8  -8  -9   28.08    3.82
   9   8   9    2.94    3.42
   9  -8   9    2.53    3.49
   9  -8  -9    5.19    3.32
   9   8  -9    2.97    3.77
   9   8   9    4.87    6.76
  10   8  -9   71.40    5.75
  10   8   9   80.56    5.41
  10  -8  -9   74.81    5.53
  10  -8   9   72.09    5.60
  10   8   9   61.44    8.80
  11   8   9    0.66    4.17
  11  -8   9   -1.04    3.92
  11  -8  -9    4.09    3.96
  11   8  -9    7.62    4.51
  12  -8  -9    6.64    4.31
  12   8  -9    7.51    4.96
  12  -8   9    7.78    4.38
   0   9  -9    0.50    3.69
   0  -9  -9   -3.01    2.27
   0   9   9    2.26    4.36
   1  -9  -9   70.15    4.19
   1   9  -9   80.86    6.05
  -1   9   9   76.53    6.03
   1   9   9   76.59    6.60
  -1   9  -9   77.45    5.53
  -1  -9  -9   77.29    3.94
  -2   9   9   24.19    4.40
   2  -9  -9   25.85    3.21
   2  -9   9   30.57    4.21
   2   9   9   26.88    5.46
   2  -9  -9   26.28    2.23
  -2  -9  -9   21.54    2.78
   2   9  -9   21.03    4.84
   2   9  -9   24.45    2.97
   3   9   9   29.97    2.18
   3   9  -9   32.46    5.27
   3   9   9   33.82    5.92
   3   9  -9   20.93    3.07
  -3   9   9   33.79    4.33
   3  -9   9   30.01    3.88
   3  -9  -9   29.25    2.48
   4  -9   9  211.95    7.19
  -4   9   9  197.92    7.45
   4  -9  -9  208.04    5.70
   4   9   9  209.38    5.22
   4   9   9  197.50   10.34
   4   9  -9  210.65    6.50
   4   9  -9  209.03    9.40
   5   9   9  287.59   12.20
   5   9  -9  297.89    8.02
  -5   9   9  295.41    8.12
   5  -9   9  292.07    8.21
   5   9  -9  274.63   10.90
   5   9   9  285.00    6.69
   5  -9  -9  282.46    7.25
   6   9  -9  163.75    6.23
   6   9   9  141.72    5.09
   6  -9   9  148.17    6.03
   6  -9  -9  145.87    5.51
   6   9  -9  152.75    9.07
   6   9   9  141.62   10.21
   7   9  -9   85.30    5.00
   7  -9  -9   91.25    4.99
   7  -9   9   80.20    5.25
   7   9   9   85.00    8.57
   7   9   9   89.51    4.59
   7   9  -9   85.47    7.50
   7  -9   9   76.70    5.19
   8   9  -9  125.61    9.18
   8   9   9  131.74   10.09
   8   9   9  128.63    5.63
   8  -9  -9  130.92    5.97
   8  -9   9  126.31    5.89
   8   9  -9  138.70    6.43
   9  -9   9  120.96    6.42
   9   9   9  153.68   11.18
   9   9  -9  124.88    6.70
   9   9   9  134.83    6.24
   9  -9  -9  124.81    6.18
  10   9   9   36.42    8.33
  10  -9   9   44.88    5.00
  10   9  -9   43.57    5.30
  10  -9  -9   47.54    4.87
  11   9  -9  200.39    8.80
  11  -9  -9  207.81    8.33
  11  -9   9  203.73    8.51
  12   9  -9  112.37    7.68
  12  -9  -9  101.90    6.90
  12  -9   9   94.38    6.47
   0  10  -9  226.66    9.41
   0  10   9  218.04   10.11
   0 -10  -9  213.32    6.37
  -1  10   9   85.39    6.51
  -1 -10  -9   80.97    4.12
  -1  10  -9   96.49    7.10
   1  10  -9   83.66    6.41
   1 -10  -9   81.70    4.45
  -1 -10   9   82.53    2.67
   1  10   9   88.80    7.14
  -2 -10  -9   -0.03    2.32
  -2  10   9   -3.96    3.92
   2  10  -9    3.61    2.41
   2  10   9   -4.96    4.81
   2  10  -9    7.14    4.50
   2 -10  -9    2.37    2.69
   3 -10  -9   49.31    3.92
   3 -10   9   42.58    4.54
   3  10  -9   37.33    5.74
   3  10  -9   47.96    3.71
   3  10   9   50.61    2.89
  -3  10   9   42.36    4.92
   3 -10  -9   45.20    3.26
   3  10   9   52.75    6.72
   4 -10  -9   66.16    3.87
  -4  10   9   64.85    5.09
   4  10  -9   71.57    4.52
   4  10  -9   62.72    6.51
   4 -10   9   69.83    4.85
   4  10   9   70.48    7.57
   4  10   9   68.91    3.45
   5 -10   9   50.93    4.20
   5 -10  -9   44.71    3.35
   5  10  -9   43.32    6.25
   5  10   9   43.28    3.30
   5  10  -9   41.96    3.96
   5  10   9   39.20    7.10
   6 -10   9   52.11    4.26
   6  10  -9   47.82    6.76
   6  10  -9   55.84    4.62
   6  10   9   46.47    7.48
   6 -10  -9   51.79    3.95
   6  10   9   51.84    3.55
   7 -10   9   38.66    4.13
   7 -10  -9   38.90    3.95
   7  10  -9   34.90    4.21
   7  10  -9   32.51    6.51
   7  10   9   42.43    7.71
   7  10   9   39.80    3.53
   7 -10   9   39.65    4.04
   8  10  -9  501.37   15.82
   8 -10  -9  526.59   12.25
   8  10  -9  507.70   12.65
   8 -10   9  542.78   12.84
   8  10   9  524.06   17.84
   9  10  -9    6.62    4.06
   9 -10  -9    7.35    3.57
   9  10   9   11.26    7.34
   9 -10   9    4.87    3.71
  10  10  -9  147.53    7.57
  10 -10   9  150.60    7.06
  10 -10  -9  136.27    6.91
  10  10   9  163.36   12.20
  11 -10   9   17.46    4.80
  11 -10  -9   23.17    4.65
  11  10  -9   29.75    5.45
   0  11   9   -1.20    4.71
   0  11  -9    2.95    4.33
   0 -11  -9   -1.68    2.35
   1  11   9   11.22    5.37
   1 -11  -9   12.36    2.88
  -1  11  -9   11.52    4.42
  -1  11   9    7.63    4.77
  -1 -11  -9    9.19    2.62
   1  11  -9   10.97    4.69
   2  11  -9  168.61    5.89
   2  11   9  178.96   10.17
   2 -11  -9  162.60    6.16
  -2 -11  -9  164.38    5.70
  -2  11   9  164.96    8.73
   2  11  -9  178.98    9.21
   3  11   9  207.52   11.11
   3 -11   9  230.23    8.58
   3  11  -9  223.80   10.29
  -3  11   9  213.13    8.91
  -3 -11  -9  205.64    6.30
   3  11  -9  215.27    6.74
   3 -11  -9  220.58    7.32
   3  11   9  211.95    5.23
   3 -11  -9  212.49    5.80
   4 -11  -9    6.75    2.53
  -4  11   9    1.80    3.83
   4  11   9    7.55    6.05
   4  11  -9   12.46    3.21
   4  11  -9    6.32    5.20
   4 -11   9   12.74    3.76
   5  11  -9  212.06    7.38
   5  11  -9  215.37   10.62
   5 -11  -9  235.57    6.68
   5 -11   9  207.89    7.69
   5  11   9  222.00   11.80
   6 -11   9   12.52    3.41
   6 -11  -9   17.61    3.32
   6  11   9   12.06    6.72
   6  11  -9   12.02    5.76
   6  11  -9   11.81    3.61
   7  11   9   26.78    7.51
   7  11  -9   22.78    4.11
   7 -11   9   30.25    4.03
   7  11  -9   14.88    6.26
   7 -11  -9   23.82    3.57
   8 -11   9    7.60    3.22
   8  11  -9    3.01    3.78
   8 -11  -9    5.82    3.31
   8  11   9   -9.47    6.56
   8  11  -9   10.40    6.18
   9 -11  -9  178.31    7.26
   9 -11   9  182.19    7.71
   9  11  -9  192.26    8.06
   9  11   9  179.27   12.61
  10 -11  -9   10.17    4.19
  10  11  -9   16.48    4.95
  10 -11   9   12.66    4.29
  10  11   9    8.57    7.99
  11 -11  -9  186.43    8.26
  11 -11   9  166.86    8.19
  11  11  -9  203.41    8.97
   0 -12  -9   27.35    3.33
   0  12  -9   22.23    5.38
   0  12   9   33.75    6.07
   1 -12  -9  153.47    6.01
  -1  12   9  171.07    9.56
   1  12  -9  169.11    9.27
  -1 -12  -9  168.81    5.99
   1  12   9  170.49   10.09
  -1  12  -9  166.93    8.91
   2  12   9  205.56   11.21
  -2  12   9  181.38    9.31
   2  12  -9  197.98    9.97
   2 -12  -9  192.97    6.80
  -2 -12  -9  190.18    6.23
  -2  12  -9  185.65    9.09
  -3 -12  -9   29.70    3.38
   3 -12   9   22.87    4.58
   3  12   9   26.00    6.70
   3 -12  -9   26.67    2.77
   3 -12  -9   25.20    3.92
   3  12  -9   23.31    5.85
  -3  12   9   17.78    4.87
   3  12  -9   24.99    3.53
  -4  12   9   69.28    5.82
   4  12   9   67.58    8.28
   4 -12  -9   65.24    4.06
   4  12  -9   72.13    4.86
   4  12  -9   76.52    7.61
   4 -12   9   61.29    5.34
   5 -12  -9  172.05    5.86
   5  12  -9  168.84    6.91
   5  12  -9  169.81   10.24
   5 -12   9  177.86    7.47
   5  12   9  176.99   11.54
   6  12  -9   13.51    3.77
   6  12  -9   11.10    5.99
   6 -12  -9   14.11    3.13
   6 -12   9   12.40    3.69
   6  12   9   15.65    7.16
   7  12  -9   19.91    4.14
   7  12   9   11.01    7.40
   7 -12  -9   13.57    3.58
   7  12  -9   27.77    6.76
   7 -12   9   32.32    4.14
   8 -12   9   53.37    5.00
   8  12   9   44.48    8.78
   8  12  -9   58.16    7.97
   8 -12  -9   53.28    4.55
   8  12  -9   66.39    5.50
   9 -12  -9    1.50    3.62
   9  12  -9    2.23    6.45
   9  12  -9    7.56    4.33
   9  12   9    1.11    7.69
   9 -12   9    3.39    3.94
  10  12   9   21.92    8.58
  10 -12   9   13.57    4.48
  10 -12  -9   12.63    4.23
  11  12  -9    4.64    5.19
  11 -12   9    2.70    4.50
  11 -12  -9    4.97    4.33
   0 -13  -9   -2.30    2.90
   0  13  -9   -0.02    4.78
   0  13   9   -0.32    5.37
  -1  13   9   48.04    6.60
   1  13  -9   35.81    6.17
   1 -13  -9   42.46    4.11
  -1  13  -9   37.09    5.80
   1  13   9   40.05    6.96
  -1 -13  -9   41.29    3.85
  -2  13   9    2.80    4.96
  -2  13  -9    2.49    4.51
   2 -13  -9    0.57    3.12
   2  13   9    0.97    5.93
   2  13  -9   -1.70    5.08
  -2 -13  -9    4.56    2.93
  -3  13   9   35.64    5.65
   3  13  -9   39.60    3.96
   3  13  -9   36.16    6.58
   3 -13   9   33.26    5.08
   3  13   9   40.38    7.42
   3 -13  -9   34.46    4.20
   3 -13  -9   36.42    3.14
   4 -13  -9    1.73    2.64
   4 -13   9    3.01    3.92
   4 -13  -9   -4.61    3.51
   4  13   9    0.33    6.41
   4  13  -9   -0.80    5.53
  -4  13   9    0.88    4.32
   4  13  -9   -1.50    3.43
   5  13   9   20.85    7.38
   5  13  -9    6.96    6.13
   5 -13  -9   14.84    2.99
   5  13  -9   11.24    3.68
   5 -13   9   13.23    4.07
   6  13  -9    9.95    4.06
   6 -13   9    2.78    3.55
   6  13  -9    0.74    5.98
   6 -13  -9    5.48    2.95
   6  13   9    2.07    7.06
   7  13   9   60.21    9.24
   7  13  -9   47.81    7.79
   7 -13   9   44.86    4.61
   7  13  -9   50.68    4.89
   7 -13  -9   52.26    4.42
   8 -13   9   15.94    4.15
   8  13   9   18.88    8.27
   8  13  -9   11.17    6.85
   8 -13  -9   16.92    3.74
   8  13  -9   20.61    4.95
   9 -13  -9   -3.30    3.73
   9  13  -9    2.81    6.42
   9 -13   9    3.24    3.89
   9  13   9    7.16    8.23
   9  13  -9    3.66    4.45
  10 -13   9   24.15    4.90
  10  13   9   22.84    9.08
  10  13  -9   27.92    5.72
  10 -13  -9   19.35    4.56
   0  14  -9  128.39    9.17
   0  14   9  108.81    8.89
   0 -14  -9  120.45    5.56
  -1  14   9    7.23    5.42
  -1 -14  -9    4.04    2.91
   1  14   9   -0.30    5.91
   1 -14  -9    0.41    2.95
  -1  14  -9   -1.97    4.89
   1  14  -9    5.01    5.28
   2  14  -9  103.65    8.38
  -2  14   9  108.61    8.08
   2  14   9   95.70    9.07
   2 -14  -9  100.16    5.60
  -2  14  -9  108.75    7.80
   3 -14  -9  174.44    7.03
   3 -14   9  154.87    8.49
   3  14   9  167.28   11.52
   3  14  -9  148.57   10.12
  -3  14   9  157.15    9.10
  -4  14   9  111.47    8.02
   4 -14  -9  128.62    6.66
   4  14  -9  119.32    5.86
   4  14   9  118.45   10.19
   4  14  -9  118.04    9.24
   4 -14   9  106.60    7.32
   5  14  -9    1.60    3.52
   5 -14   9   -0.06    3.91
   5  14   9   11.54    7.34
   5  14  -9   -6.91    5.87
   5 -14  -9    4.06    2.97
   6  14  -9   45.83    7.80
   6 -14   9   57.22    5.31
   6  14   9   53.03    9.14
   6  14  -9   61.66    5.16
   6 -14  -9   61.68    4.51
   7  14   9    2.10    7.66
   7 -14  -9    5.36    3.25
   7  14  -9   -0.06    6.47
   7 -14   9    4.92    3.68
   7  14  -9    8.78    4.21
   8  14  -9  107.44    6.73
   8 -14   9  110.29    6.45
   8  14  -9  105.44    9.82
   8  14   9  109.41   11.40
   8 -14  -9  109.56    5.95
   9 -14   9  134.44    7.15
   9  14   9  132.25   12.21
   9 -14  -9  131.61    6.70
   9  14  -9  124.15    7.76
   9  14  -9  127.02   10.36
  10  14   9   64.70   10.78
  10 -14  -9   64.39    5.67
  10  14  -9   83.57    6.83
  10 -14   9   61.42    5.93
   0  15  -9    0.18    5.42
   0 -15  -9    2.48    3.43
   0  15   9   -1.94    5.86
   1  15   9   61.09    8.26
  -1  15  -9   64.20    7.22
  -1  15   9   63.58    7.63
   1  15  -9   64.95    7.56
   1 -15  -9   71.39    4.97
   2 -15  -9   13.14    3.60
   2  15   9   18.69    6.99
  -2  15  -9    6.53    5.39
  -2  15   9   10.49    5.78
   2  15  -9   11.19    5.94
   3 -15  -9   26.46    4.15
   3  15   9   25.71    7.56
  -3  15   9   29.06    6.11
   3  15  -9   25.08    6.65
   3 -15   9   28.17    5.48
  -4  15   9  223.73   10.43
   4 -15  -9  229.82    8.52
   4  15   9  222.57   13.03
   4 -15   9  222.20    9.69
   4  15  -9  239.31    7.96
   4  15  -9  230.88   11.98
   5  15  -9   81.88    8.87
   5  15  -9   70.51    5.35
   5 -15   9   72.60    6.13
   5 -15  -9   72.43    5.91
   5  15   9   72.57    9.62
   6  15  -9   -2.76    6.33
   6 -15   9   -3.42    3.84
   6  15  -9   -1.75    4.01
   6  15   9    0.10    7.50
   7  15   9   21.62    8.49
   7  15  -9   10.25    7.04
   7  15  -9    7.86    4.63
   7 -15   9    0.55    3.63
   8 -15   9   26.07    4.55
   8  15  -9   39.19    5.62
   8  15   9   27.63    9.13
   8  15  -9   34.46    8.01
   9  15  -9    0.75    7.01
   9  15   9  -16.01    7.78
   9 -15  -9   -1.52    3.82
   9  15  -9    6.86    4.77
   9 -15   9   -0.89    3.89
   0  16   9   31.12    7.16
   0  16  -9   34.56    6.93
   1 -16  -9   94.85    5.91
   1  16  -9   94.60    8.66
  -1  16   9  111.79    9.18
  -1  16  -9   91.19    8.24
   1  16   9   93.28    9.37
  -2  16   9   -0.61    5.48
   2  16  -9   -3.41    5.67
  -2  16  -9   -5.82    5.11
   2  16   9    0.38    6.65
   2 -16  -9   -1.62    3.43
   3  16   9   20.10    7.64
   3 -16  -9    5.90    3.80
   3 -16   9   11.88    5.22
  -3  16   9   12.28    5.88
   3  16  -9    8.52    6.38
   4  16   9    3.56    7.37
   4  16  -9    6.91    6.30
   4 -16   9   16.98    5.17
   4 -16  -9   13.51    4.12
   5  16  -9    7.96    6.76
   5  16  -9    2.87    3.87
   5 -16  -9    5.04    4.38
   5  16   9    2.80    7.59
   5 -16   9   -4.21    4.17
   6  16  -9  280.49   13.73
   6 -16  -9  292.89   10.51
   6  16  -9  293.94    9.51
   6  16   9  288.52   15.33
   7 -16   9    6.21    3.88
   7  16   9    8.04    8.49
   7  16  -9   -5.80    6.83
   7  16  -9    7.90    4.51
   8 -16   9    1.57    3.78
   8  16  -9   -0.69    6.78
   8  16  -9   -1.43    4.46
   8  16   9    0.21    8.38
   0  17   9    1.67    6.34
   0  17  -9   -2.34    5.89
  -1  17   9  139.63   10.56
  -1  17  -9  161.57   10.35
   1  17   9  127.45   10.47
   1  17  -9  142.40   10.53
   2  17  -9    2.04    6.06
   2  17   9   11.59    7.49
  -2  17  -9    1.36    5.60
  -2  17   9    7.25    6.13
   3 -17  -9   39.62    4.84
   3 -17   9   39.41    6.33
   3  17  -9   37.69    7.72
   3  17   9   61.83    9.22
  -3  17   9   47.69    7.46
   4  17  -9    7.68    6.68
   4  17   9   -4.09    7.36
   4 -17  -9   -4.88    4.20
   4 -17   9    0.68    4.83
   5 -17   9   28.58    5.53
   5  17  -9   20.74    7.71
   5 -17  -9   24.12    5.11
   5  17   9   21.30    8.51
   6  17  -9    7.65    7.07
   6  17  -9   16.81    4.60
   6  17   9   19.56    8.82
   6 -17  -9   14.63    5.03
   7  17  -9   88.15   10.08
   7 -17   9   87.83    6.18
   7  17   9   93.88   11.52
   7 -17  -9   95.53    7.13
   8  17   9   81.28   11.45
   8 -17   9   84.55    6.27
   8  17  -9   63.31    9.45
   0  18  -9   36.88    7.48
   0  18   9   59.07    8.55
  -1  18   9   19.50    7.10
  -1  18  -9   20.33    6.73
   1  18  -9   23.64    7.12
   1  18   9   20.30    7.51
   2  18   9   -8.32    6.78
  -2  18   9    1.45    6.24
   2  18  -9    0.76    6.40
  -2  18  -9    6.01    6.10
   3  18   9   49.63    9.14
   3  18  -9   58.82    8.58
  -3  18   9   36.84    7.53
   3 -18   9   41.67    6.74
   4 -18  -9   54.61    5.67
   4 -18   9   56.63    6.83
   4  18  -9   61.08    8.80
   4  18   9   62.01    9.95
   5 -18   9  223.37   10.13
   5 -18  -9  215.97    9.18
   5  18   9  190.60   13.92
   5  18  -9  207.63   12.82
   6  18  -9  258.25   14.05
   6 -18  -9  271.15   10.51
   6  18   9  266.76   15.74
   7  18  -9   15.34    7.90
   7 -18  -9   16.65    5.64
   7 -18   9   10.49    4.46
   7  18   9   13.94    9.21
   0  19  -9    8.02    6.59
   0  19   9   -3.08    6.82
   1  19   9  126.03   11.27
  -1  19   9  115.48   10.23
  -1  19  -9  109.49    9.61
   1  19  -9  116.06   10.04
  -2  19   9    9.01    7.12
   2  19   9   17.20    8.04
   2  19  -9   21.35    7.31
   3  19   9   23.73    8.48
  -3  19   9   11.05    7.02
   3 -19   9   16.03    6.25
   3  19  -9   16.16    7.22
   4 -19   9  116.02    8.64
   4  19   9  124.07   11.87
   4  19  -9   93.88    9.87
   5 -19  -9   89.65    6.95
   5  19  -9   86.29    9.99
   5 -19   9   94.52    7.84
   5  19   9   85.81   11.21
   6  19  -9   91.21   10.50
   6 -19  -9  100.43    7.63
   6  19   9   88.29   11.76
   0  20  -9   15.74    7.09
   0  20   9   15.86    7.64
  -1  20   9  -13.93    6.32
   1  20  -9    1.70    6.73
   1  20   9   -5.98    7.16
  -1  20  -9   -7.31    6.23
   2  20   9   25.61    8.79
   2  20  -9   23.42    7.62
  -2  20   9   21.07    8.08
   3  20   9   42.07    9.51
   3 -20   9   26.81    6.89
   4  20   9   56.84   10.05
   4 -20   9   33.20    6.71
   4  20  -9   43.26    8.65
   0  21   9    9.89    7.81
   0  21  -9   -7.43    6.53
  -1  21   9   -0.90    7.50
   1  21   9    6.03    7.87
   1  21  -9    2.67    7.01
  -1  21  -9   -6.40    6.57
   2  21   9   18.20    8.77
   2  21  -9   28.15    8.07
  -2  21   9   16.63    8.35
   0   0  10 5201.52   81.63
   0   0 -10 5189.32   84.46
   0   0 -10 5186.53   81.77
   1   0  10   24.25    2.83
  -1   0  10   22.60    2.26
   1   0 -10   16.64    1.91
   1   0 -10   21.09    1.91
   2   0 -10  468.71    9.15
  -2   0  10  478.94    8.65
   2   0  10  488.23   10.37
   2   0 -10  477.25    8.79
   3   0 -10 5636.13   88.16
   3   0  10 5605.12   87.97
  -3   0  10 5808.74   89.30
   3   0  10 5699.55   90.31
   4   0  10 1910.87   33.46
  -4   0  10 1983.67   31.27
   4   0 -10 1967.20   31.81
   4   0  10 1949.09   31.57
   5   0  10  825.00   14.90
   5   0 -10  837.98   15.19
   5   0  10  818.76   16.92
   6   0  10   55.64    3.66
   6   0 -10   57.26    4.06
   6   0  10   61.78    4.96
   7   0 -10   11.29    2.80
   7   0  10   22.42    2.88
   7   0  10   17.57    4.44
   8   0  10   61.06    4.37
   8   0 -10   54.27    4.27
   8   0  10   66.46    5.92
   9   0 -10  397.92   10.40
   9   0  10  404.43   12.57
   9   0  10  400.58   10.18
  10   0 -10  373.99   10.21
  10   0  10  378.50   10.16
  11   0 -10  220.09    8.06
  11   0  10  207.41    7.88
  12   0 -10    9.38    4.52
  12   0  10    7.13    4.22
  13   0  10   12.43    4.75
  13   0 -10    5.40    4.64
   0   1 -10   -0.18    1.62
   0   1 -10   -2.68    1.46
   0  -1 -10   -2.21    1.86
   0  -1 -10   -0.37    1.16
   0  -1  10   -2.13    1.93
   0   1  10   -3.79    2.40
   1  -1  10   87.69    4.06
   1  -1 -10   81.12    2.81
   1   1  10   85.21    5.24
  -1  -1  10   84.50    3.59
   1   1 -10   88.75    3.26
   1   1 -10   82.61    2.88
  -1   1  10   85.22    4.05
   1  -1 -10   88.93    3.66
  -2  -1  10 1265.51   20.78
  -2   1  10 1250.01   20.64
   2  -1 -10 1247.31   21.49
   2   1  10 1282.27   22.43
   2  -1 -10 1276.33   20.44
   2  -1  10 1265.06   21.60
   2   1 -10 1234.20   20.61
   2   1 -10 1238.74   21.11
  -3  -1  10  278.61    6.02
  -3   1  10  263.37    5.27
   3   1  10  275.30    5.76
   3  -1 -10  278.63    6.05
   3   1  10  280.77    8.38
   3  -1  10  264.81    7.26
   3   1 -10  266.72    6.02
   4  -1  10 1230.90   22.18
   4  -1  10 1234.87   20.86
   4   1  10 1253.24   23.03
   4  -1 -10 1237.36   20.91
   4   1 -10 1216.37   20.99
   4   1  10 1252.86   20.65
   5  -1 -10  507.10   10.26
   5   1 -10  522.69    9.79
   5  -1  10  495.15   11.53
   5   1  10  516.19   12.40
   5  -1  10  502.03   10.12
   5   1 -10  496.70   10.20
   5   1  10  493.81    9.87
   6  -1  10  109.36    4.59
   6   1  10  106.23    4.40
   6   1 -10  111.98    4.35
   6   1  10  108.34    6.90
   6   1 -10  107.49    4.88
   6  -1  10  106.48    6.18
   6  -1 -10  116.94    4.84
   7   1 -10  178.60    5.94
   7   1  10  169.91    8.24
   7  -1  10  164.73    7.49
   7  -1 -10  171.00    5.77
   7  -1  10  170.26    5.80
   7   1  10  153.78    5.52
   8  -1  10    2.10    2.89
   8  -1  10    6.08    4.30
   8   1  10   10.25    4.85
   8   1  10    1.94    2.80
   8   1 -10    1.06    3.16
   8  -1 -10    3.76    3.10
   9   1  10   53.29    4.24
   9  -1 -10   39.67    4.06
   9  -1  10   56.99    4.40
   9   1  10   61.64    6.63
   9   1 -10   51.79    4.33
  10  -1 -10   31.18    4.03
  10  -1  10   30.62    4.22
  10   1  10   26.19    4.02
  10   1 -10   27.45    4.37
  11   1 -10  126.97    6.82
  11  -1  10  138.05    6.72
  11  -1 -10  124.03    6.74
  11   1  10  136.99    6.60
  12   1 -10   49.63    5.45
  12   1  10   54.12    5.31
  12  -1 -10   57.86    5.64
  12  -1  10   52.59    5.39
  13  -1 -10   77.43    6.48
  13   1  10   81.70    6.66
  13  -1  10   76.33    6.21
  13   1 -10   77.18    6.46
   0   2 -10 4131.94   67.25
   0  -2 -10 4333.42   67.68
   0  -2  10 4262.54   67.75
   0  -2 -10 4357.45   69.31
   0   2  10 4365.53   68.45
  -1  -2 -10  103.24    3.81
   1   2 -10  107.51    3.21
   1  -2 -10  107.47    4.05
  -1   2  10   92.62    4.75
   1   2 -10   99.35    3.57
  -1  -2  10   97.91    4.20
   1  -2  10   99.95    4.15
   1  -2 -10   99.06    2.85
   1   2  10  104.28    5.77
   2  -2 -10 1205.38   19.50
   2   2  10 1175.04   19.21
   2   2  10 1209.38   21.97
   2   2 -10 1198.94   20.09
   2  -2  10 1201.92   20.68
  -2  -2  10 1226.96   20.54
   2  -2 -10 1204.13   20.84
   2   2 -10 1195.68   19.92
  -2   2  10 1204.30   20.21
   3   2 -10  220.56    6.12
   3   2 -10  206.56    5.27
   3  -2  10  220.46    6.28
   3  -2 -10  214.99    5.17
   3   2  10  212.31    4.80
   3   2  10  218.19    7.78
   4   2 -10  282.78    7.07
   4  -2 -10  289.18    6.48
   4   2 -10  276.20    6.61
   4  -2  10  298.45    6.74
   4  -2  10  284.90    7.50
   4   2  10  290.39    9.12
   4   2  10  288.37    6.27
   5  -2  10  167.43    6.36
   5   2 -10  162.56    5.55
   5   2  10  160.84    4.74
   5  -2 -10  163.54    5.17
   5  -2  10  161.44    5.15
   5   2 -10  154.01    5.28
   5   2  10  163.91    7.70
   6  -2  10    5.20    2.16
   6  -2 -10   -0.70    2.43
   6  -2  10    8.17    3.12
   6   2  10   -1.36    2.15
   6   2 -10   -0.45    2.60
   6   2 -10    2.28    2.70
   6   2  10    1.64    4.08
   7  -2  10   99.41    4.87
   7   2 -10  103.18    5.17
   7   2  10  111.80    7.62
   7  -2  10  111.51    6.38
   7  -2 -10  100.60    5.07
   7   2  10  102.39    4.56
   8   2  10   66.64    6.47
   8   2 -10   63.54    4.53
   8  -2  10   60.27    4.53
   8  -2  10   61.07    5.53
   8  -2 -10   58.57    4.38
   8   2  10   57.03    4.25
   9  -2  10   58.64    4.50
   9   2  10   56.77    6.78
   9   2  10   58.75    4.31
   9  -2 -10   47.35    4.50
   9   2 -10   44.92    4.22
  10  -2 -10    3.32    3.65
  10   2 -10    8.72    3.97
  10  -2  10    7.04    3.63
  10   2  10   14.14    3.70
  11   2  10   68.62    5.24
  11  -2  10   63.46    5.05
  11   2 -10   77.59    5.84
  11  -2 -10   74.61    5.59
  12   2  10  288.31    9.62
  12  -2  10  288.73    9.73
  12   2 -10  278.06    9.93
  12  -2 -10  286.88    9.81
  13   2  10   53.93    5.93
  13  -2 -10   55.45    5.97
  13   2 -10   51.96    6.03
  13  -2  10   57.65    5.87
   0  -3  10   -0.05    2.21
   0  -3 -10   -2.81    1.75
   0   3  10   -7.89    3.00
  -1  -3 -10  922.53   16.37
   1   3 -10  903.53   15.64
  -1  -3  10  936.36   16.69
  -1   3  10  928.24   16.88
   1  -3 -10  949.88   14.89
   1  -3 -10  928.25   16.43
   1  -3  10  895.93   16.28
   1   3  10  911.50   17.77
   2  -3 -10   80.31    2.95
   2   3  10   79.17    2.34
   2   3 -10   81.00    2.67
   2   3  10   73.00    5.09
   2  -3 -10   76.01    4.04
  -2   3  10   87.44    4.52
   2   3 -10   81.78    5.04
   2  -3  10   76.93    4.14
   2   3 -10   77.31    3.26
   3  -3  10   14.43    2.46
   3   3 -10   13.18    2.94
   3   3  10   10.07    1.65
   3   3  10    6.87    3.78
  -3   3  10   11.87    2.10
   3  -3 -10   10.82    1.89
   3   3 -10   11.52    2.25
   4   3 -10  117.33    5.46
   4  -3 -10  110.49    4.08
   4  -3  10  113.86    4.87
   4   3  10  112.70    3.76
   4   3  10  109.04    6.95
   4   3 -10  110.63    4.15
   5  -3  10   -1.63    1.90
   5   3 -10    0.60    2.42
   5   3  10   -1.22    1.97
   5   3  10   -0.42    3.90
   5   3 -10   -4.99    2.72
   5  -3 -10    0.71    2.24
   5  -3  10   -1.45    2.45
   6   3 -10  223.83    7.38
   6  -3  10  231.17    6.59
   6   3  10  232.32    6.24
   6  -3 -10  232.54    6.35
   6   3  10  226.36    9.40
   6   3 -10  227.36    6.53
   6  -3  10  239.22    7.53
   7  -3  10  123.98    6.44
   7   3 -10  123.70    6.13
   7   3  10  120.84    4.86
   7   3  10  123.49    8.19
   7   3 -10  124.47    5.55
   7  -3 -10  112.83    5.24
   7  -3  10  131.29    5.33
   8   3  10  993.67   18.76
   8  -3  10 1022.53   20.41
   8  -3  10 1006.26   19.28
   8   3  10 1042.08   22.77
   8   3 -10 1011.02   19.48
   8  -3 -10  996.30   19.22
   9   3  10  118.33    8.45
   9  -3  10   99.31    5.57
   9   3 -10  100.26    5.53
   9  -3 -10   92.95    5.58
   9   3  10  108.75    5.38
  10   3  10   59.26    4.72
  10   3 -10   42.79    4.49
  10  -3  10   59.46    4.87
  10  -3 -10   47.08    4.72
  11  -3  10  171.62    7.49
  11   3  10  183.14    7.34
  11   3 -10  184.02    7.84
  11  -3 -10  168.22    7.21
  12  -3  10   21.15    4.65
  12  -3 -10   18.55    4.76
  12   3  10   21.18    4.52
  12   3 -10   16.03    4.80
  13  -3  10   37.33    5.12
  13   3 -10   31.50    5.41
  13  -3 -10   29.93    5.21
  13   3  10   35.26    5.29
   0   4  10   37.01    4.14
   0  -4 -10   39.90    2.80
   0  -4  10   36.38    3.32
   1   4 -10  194.15    5.04
   1  -4 -10  211.93    4.19
   1   4  10  197.36    7.85
   1  -4  10  211.80    6.22
   1  -4 -10  208.27    5.50
  -1   4  10  195.33    6.89
   2  -4 -10 2481.09   38.04
   2   4 -10 2430.46   40.27
   2   4  10 2409.65   37.76
   2  -4 -10 2397.13   40.35
  -2   4  10 2381.83   39.71
   2   4 -10 2363.70   38.69
   2  -4  10 2411.68   39.56
   2   4  10 2417.29   41.58
   2   4 -10 2474.07   39.51
   3   4 -10  400.18    8.55
  -3   4  10  403.64    8.65
   3  -4  10  406.53    8.93
   3   4  10  407.66   11.43
   3   4 -10  410.09    9.96
   3  -4 -10  420.44    8.07
   3   4 -10  411.46    7.49
   3   4  10  411.42    7.48
   4   4  10  483.38    8.72
   4   4 -10  452.63    9.48
   4   4 -10  455.97   10.90
   4  -4  10  451.03    9.79
   4   4  10  435.85   12.59
   4  -4 -10  470.24    9.28
   5  -4  10   71.79    4.56
   5  -4  10   66.95    3.70
   5   4 -10   72.64    4.22
   5   4  10   74.04    3.49
   5   4  10   82.36    6.35
   5  -4 -10   72.07    3.89
   5   4 -10   75.05    4.84
   6   4  10  812.02   14.54
   6   4  10  764.28   18.36
   6  -4 -10  785.44   14.89
   6   4 -10  789.68   15.18
   6  -4  10  792.80   15.17
   6   4 -10  773.31   16.19
   6  -4  10  767.78   15.48
   7   4  10   31.90    3.26
   7  -4 -10   34.42    3.51
   7   4 -10   26.72    4.18
   7   4  10   29.72    5.77
   7  -4  10   23.60    3.73
   7  -4  10   27.80    3.40
   7   4 -10   30.85    3.42
   8  -4  10  124.44    6.77
   8   4 -10  110.12    5.82
   8   4  10  113.54    5.14
   8  -4  10  112.82    5.58
   8   4  10  111.40    8.20
   8  -4 -10  128.36    5.73
   9   4 -10   -1.75    3.49
   9   4  10    2.40    5.60
   9  -4 -10    1.79    2.97
   9   4  10    3.03    3.06
   9  -4  10    0.54    2.85
  10  -4 -10  181.40    7.35
  10   4 -10  183.57    7.59
  10  -4  10  187.76    7.39
  10   4  10  187.14    7.00
  11   4  10   72.82    5.32
  11  -4 -10   56.81    5.32
  11  -4  10   61.90    5.42
  11   4 -10   53.54    5.48
  12   4 -10   93.16    6.70
  12   4  10   80.00    6.11
  12  -4  10   78.81    6.15
  12  -4 -10   84.11    6.35
  13   4 -10   60.25    6.23
  13  -4  10   63.66    6.11
  13  -4 -10   43.84    5.75
  13   4  10   54.50    5.78
   0   5  10    0.72    3.57
   0  -5 -10    2.62    2.20
   0  -5  10   -0.95    2.76
   0  -5 -10    0.70    0.76
  -1  -5 -10   31.23    2.65
  -1   5  10   31.11    4.04
   1   5  10   25.70    4.45
   1  -5 -10   41.91    2.95
   1  -5 -10   33.80    2.00
   1  -5  10   33.79    3.31
   1   5 -10   34.11    2.66
   1   5 -10   37.17    3.86
   2  -5  10  135.21    5.30
   2   5  10  118.65    7.31
   2   5  10  129.06    2.90
   2  -5 -10  134.89    3.56
  -2  -5 -10  132.23    4.52
   2   5 -10  127.38    6.46
   2  -5 -10  132.03    4.70
  -2   5  10  132.33    6.06
   2   5 -10  134.80    4.54
   3   5 -10   13.13    1.19
   3   5 -10   11.70    3.52
   3   5  10    9.39    4.43
   3  -5 -10   20.68    2.12
   3   5 -10   16.36    2.51
   3  -5  10   16.40    2.59
  -3   5  10   17.20    2.89
   3   5  10   15.42    1.60
  -4   5  10   76.34    3.64
   4   5 -10   77.83    5.96
   4  -5  10   74.24    4.24
   4   5  10   73.84    6.20
   4   5  10   68.77    3.09
   4  -5 -10   72.39    3.74
   4   5 -10   79.13    4.06
   5   5 -10   16.39    2.86
   5   5  10   18.94    2.29
   5   5  10   22.64    5.16
   5  -5 -10   20.11    2.80
   5  -5  10   21.36    2.88
   5   5 -10   26.63    4.09
   6   5 -10    8.32    2.88
   6  -5  10    6.57    2.72
   6  -5 -10    9.94    2.56
   6  -5  10    3.74    2.69
   6   5 -10    7.57    3.89
   6   5  10   17.05    5.14
   6   5  10    3.10    2.33
   7  -5  10   10.93    3.12
   7   5  10   10.20    5.32
   7   5 -10    9.73    4.14
   7  -5 -10    9.89    2.98
   7  -5  10   11.31    3.32
   7   5  10    6.57    2.56
   7   5 -10    6.92    3.23
   8   5  10   47.06    6.84
   8  -5  10   49.99    4.28
   8   5  10   48.66    3.84
   8   5 -10   52.95    4.61
   8  -5 -10   52.06    4.26
   8  -5  10   60.37    5.04
   9  -5  10    3.41    3.38
   9  -5 -10    0.22    3.36
   9   5 -10    3.02    3.67
   9   5  10   -3.04    3.00
   9   5  10    8.53    6.03
  10   5  10   31.43    4.09
  10  -5 -10   24.50    4.24
  10   5 -10   32.06    4.70
  10  -5  10   23.51    4.25
  11   5  10   43.88    4.71
  11   5 -10   52.11    5.52
  11  -5  10   43.49    5.01
  11  -5 -10   41.11    5.05
  12   5 -10   40.18    5.53
  12  -5 -10   24.16    5.05
  12  -5  10   27.55    4.91
  12   5  10   20.09    4.61
  13   5  10   12.42    4.77
  13  -5 -10    4.53    4.80
  13  -5  10    9.57    4.70
  13   5 -10   -3.92    4.70
   0  -6 -10  514.45   10.24
   0   6  10  486.67   12.68
   0   6 -10  514.83   11.91
   1  -6 -10  289.47    5.38
   1  -6  10  283.34    8.17
  -1  -6 -10  286.35    6.87
   1   6 -10  275.22    8.76
   1   6  10  266.50    9.59
   1   6 -10  281.87    6.72
  -1   6  10  296.70    9.22
   1  -6 -10  281.75    6.87
   2  -6  10  506.92   11.16
   2  -6 -10  527.38    9.24
   2   6 -10  514.12   12.42
  -2  -6 -10  494.96   10.30
   2  -6 -10  514.72   10.69
  -2   6  10  525.48   11.88
   2   6 -10  505.51   10.25
   2   6  10  506.55    8.63
   2   6  10  512.75   13.51
  -3   6  10  112.72    5.59
   3   6  10  100.22    3.02
   3   6 -10  100.42    6.58
   3   6 -10  102.72    4.39
   3  -6  10  104.95    4.90
   3   6  10  105.26    7.84
   3  -6 -10  105.81    3.71
   4   6  10   81.44    6.72
   4   6 -10   84.18    6.49
  -4   6  10   80.33    4.32
   4  -6  10   73.75    4.38
   4  -6 -10   82.21    3.82
   4   6 -10   76.48    4.23
   4   6  10   81.81    3.14
   5  -6 -10  616.98   11.98
   5   6  10  607.58   16.19
   5   6 -10  630.76   14.65
   5   6  10  611.19   11.42
   5  -6  10  608.17   12.58
   5   6 -10  617.19   12.52
   6  -6 -10  467.89   10.22
   6   6  10  473.40    9.73
   6  -6  10  479.91   10.75
   6   6 -10  454.93   10.49
   6   6  10  477.96   14.52
   6   6 -10  462.80   12.53
   6  -6  10  474.48   10.75
   7  -6  10    3.77    3.09
   7   6 -10    7.63    3.28
   7   6  10    6.47    2.53
   7   6 -10    1.62    4.37
   7  -6  10    3.60    2.98
   7  -6 -10    7.77    2.90
   7   6  10    8.86    5.58
   8  -6 -10   92.91    5.37
   8  -6  10   98.48    5.57
   8   6  10  102.34    5.19
   8   6 -10   91.52    5.25
   8   6  10  121.56    8.83
   9  -6 -10   55.34    4.70
   9  -6  10   57.17    4.48
   9   6 -10   59.99    5.10
   9   6  10   63.46    7.91
   9   6  10   61.68    4.63
  10   6 -10    6.08    4.19
  10  -6 -10    0.54    3.54
  10  -6  10    7.99    3.77
  10   6  10    9.97    3.64
  10   6  10    4.43    6.55
  11  -6 -10   99.41    6.26
  11   6  10  105.21    6.15
  11   6 -10   91.05    6.26
  11  -6  10   94.79    6.34
  12  -6 -10    5.89    4.40
  12   6  10    7.81    4.37
  12   6 -10    6.46    4.79
  12  -6  10   13.48    4.59
   0  -7 -10    0.61    2.17
   0   7  10   -0.22    3.99
   0   7 -10    1.25    3.30
   1   7 -10    6.95    2.36
  -1   7  10    4.54    3.84
   1  -7  10    1.54    3.11
   1   7 -10    1.08    3.47
   1  -7 -10    4.88    1.41
   1   7  10    4.96    4.33
  -1  -7 -10    1.45    2.05
   1  -7 -10    4.34    2.35
   2   7 -10  273.85    9.15
   2   7  10  276.95   10.56
   2   7 -10  273.93    6.88
   2  -7 -10  278.14    5.78
   2   7  10  263.03    5.17
  -2   7  10  276.35    8.92
   2  -7  10  268.37    7.92
   2  -7 -10  272.36    7.31
  -2  -7 -10  267.73    6.73
   3   7  10   99.43    7.07
   3  -7  10   94.08    5.00
   3   7 -10   88.47    5.95
   3   7  10   87.98    2.87
  -3   7  10   95.13    5.85
   3   7 -10   79.82    4.24
   3  -7 -10   87.26    3.51
   4   7 -10  405.07    9.34
   4  -7 -10  418.18    8.62
   4  -7  10  408.74    9.68
  -4   7  10  426.61    9.67
   4   7  10  405.04   13.02
   4   7  10  408.82    7.97
   4   7 -10  441.12   12.08
   5  -7  10  107.52    5.00
   5   7  10  101.13    3.74
   5   7  10  100.26    7.77
   5  -7 -10   99.45    4.27
  -5   7  10   88.11    4.28
   5   7 -10   97.29    4.53
   5   7 -10   93.05    7.16
   6  -7 -10  609.84   12.21
   6   7  10  609.05   11.60
   6   7  10  582.63   16.82
   6  -7  10  606.61   12.66
   6   7 -10  594.64   15.05
   6  -7  10  586.47   12.63
   6   7 -10  570.48   12.59
   7  -7 -10  253.43    7.47
   7  -7  10  255.36    7.95
   7   7  10  229.01   11.51
   7   7  10  265.32    7.10
   7   7 -10  259.05    7.72
   7   7 -10  249.66   10.06
   7  -7  10  262.08    7.65
   8  -7  10    0.08    2.78
   8  -7 -10   -1.55    3.08
   8   7 -10    5.27    3.56
   8   7 -10   -2.24    4.84
   8   7  10    6.53    3.19
   8   7  10    3.91    6.06
[truncated: 985,162 more chars]
