# Supplementary material
Source: MDPI journal article supplement (https://www.mdpi.com/2304-6740/6/4/107)
Supplement: s1 [file s1 › Cif and checkCif files/si302a.cif]

 
data_si302a
 
_audit_creation_method            SHELXL-2014
_chemical_name_systematic
;
 ?
;
_chemical_name_common             ?
_chemical_melting_point           ?
_chemical_formula_moiety          ?
_chemical_formula_sum
 'C65.50 H136 Si16' 
_chemical_formula_weight          1373.17

loop_
 _atom_type_symbol
 _atom_type_description
 _atom_type_scat_dispersion_real
 _atom_type_scat_dispersion_imag
 _atom_type_scat_source
 'C'  'C'   0.0033   0.0016
 'International Tables Vol C Tables 4.2.6.8 and 6.1.1.4'
 'H'  'H'   0.0000   0.0000
 'International Tables Vol C Tables 4.2.6.8 and 6.1.1.4'
 'Si'  'Si'   0.0817   0.0704
 'International Tables Vol C Tables 4.2.6.8 and 6.1.1.4'
 
_space_group_crystal_system       triclinic
_space_group_IT_number            2
_space_group_name_H-M_alt         'P -1'
_space_group_name_Hall            '-P 1'
 
_shelx_space_group_comment
;
The symmetry employed for this shelxl refinement is uniquely defined
by the following loop, which should always be used as a source of
symmetry information in preference to the above space-group names.
They are only intended as comments.
;
 
loop_
 _space_group_symop_operation_xyz
 'x, y, z'
 '-x, -y, -z'
 
_cell_length_a                    11.5327(18)
_cell_length_b                    17.883(3)
_cell_length_c                    21.560(3)
_cell_angle_alpha                 69.416(2)
_cell_angle_beta                  85.458(2)
_cell_angle_gamma                 76.379(2)
_cell_volume                      4045.5(11)
_cell_formula_units_Z             2
_cell_measurement_temperature     100(2)
_cell_measurement_reflns_used      9909
_cell_measurement_theta_min        2.71
_cell_measurement_theta_max       27.90
 
_exptl_crystal_description        block
_exptl_crystal_colour             orange
_exptl_crystal_density_meas       ? 
_exptl_crystal_density_method     ?              
_exptl_crystal_density_diffrn     1.127          
_exptl_crystal_F_000              1506
_exptl_transmission_factor_min    ?                                             
_exptl_transmission_factor_max    ?                                             
_exptl_crystal_size_max           0.200
_exptl_crystal_size_mid           0.200
_exptl_crystal_size_min           0.100
_exptl_absorpt_coefficient_mu     0.287
_shelx_estimated_absorpt_T_min    0.945
_shelx_estimated_absorpt_T_max    0.972
_exptl_absorpt_correction_type    empirical
_exptl_absorpt_correction_T_min   0.6921   
_exptl_absorpt_correction_T_max   0.7456 
_exptl_absorpt_process_details    
;
SADABS Sheldrick 1996
;
_exptl_special_details
;
 ?
;
 
_diffrn_ambient_temperature       100(2)
_diffrn_radiation_wavelength      0.71073
_diffrn_radiation_type            MoK\a
_diffrn_radiation_source          'Bruker TXS fine-focus rotating anode' 
_diffrn_radiation_monochromator   'Bruker Helios multilayer confocal mirror' 
_diffrn_measurement_device_type   'Bruker APEXII CCD area detector' 
_diffrn_measurement_method        'phi and omega scans' 
_diffrn_detector_area_resol_mean  8.333
_diffrn_reflns_number             21370
_diffrn_reflns_av_unetI/netI      0.0376
_diffrn_reflns_av_R_equivalents   0.0172
_diffrn_reflns_limit_h_min        -14
_diffrn_reflns_limit_h_max        11
_diffrn_reflns_limit_k_min        -20
_diffrn_reflns_limit_k_max        22
_diffrn_reflns_limit_l_min        -27
_diffrn_reflns_limit_l_max        26
_diffrn_reflns_theta_min          1.817
_diffrn_reflns_theta_max          26.500
_diffrn_reflns_theta_full         25.242
_diffrn_measured_fraction_theta_max   0.962
_diffrn_measured_fraction_theta_full  0.972
_diffrn_reflns_Laue_measured_fraction_max    0.962
_diffrn_reflns_Laue_measured_fraction_full   0.972
_diffrn_reflns_point_group_measured_fraction_max   0.962
_diffrn_reflns_point_group_measured_fraction_full  0.972
_reflns_number_total              16153
_reflns_number_gt                 13586
_reflns_threshold_expression      'I > 2\s(I)'
_reflns_Friedel_coverage          0.000
_reflns_Friedel_fraction_max      .
_reflns_Friedel_fraction_full     .
 
_reflns_special_details
;
 Reflections were merged by SHELXL according to the crystal
 class for the calculation of statistics and refinement.
 
 _reflns_Friedel_fraction is defined as the number of unique
 Friedel pairs measured divided by the number that would be
 possible theoretically, ignoring centric projections and
 systematic absences.
;
 
_computing_data_collection        'APEX2 (Bruker AXS, 2006)'
_computing_cell_refinement        'APEX2 (Bruker AXS, 2006)'
_computing_data_reduction         'SAINT (Bruker AXS, 2004)'
_computing_structure_solution     'SHELXS-97 (Sheldrick, 1997)'
_computing_structure_refinement   'SHELXL-2014 (Sheldrick, 2014)'
_computing_molecular_graphics     'XSHEL (Bruker AXS,2002)'
_computing_publication_material   'XCIF (Bruker AXS, 2001)' 
 
_refine_special_details
;
 ?
;
_refine_ls_structure_factor_coef  Fsqd
_refine_ls_matrix_type            full
_refine_ls_weighting_scheme       calc
_refine_ls_weighting_details
'w=1/[\s^2^(Fo^2^)+(0.0382P)^2^+3.3557P] where P=(Fo^2^+2Fc^2^)/3'
_atom_sites_solution_primary      ?
_atom_sites_solution_secondary    ?
_atom_sites_solution_hydrogens    geom
_refine_ls_hydrogen_treatment     constr
_refine_ls_extinction_method      none
_refine_ls_extinction_coef        .
_refine_ls_number_reflns          16153
_refine_ls_number_parameters      803
_refine_ls_number_restraints      93
_refine_ls_R_factor_all           0.0461
_refine_ls_R_factor_gt            0.0357
_refine_ls_wR_factor_ref          0.0941
_refine_ls_wR_factor_gt           0.0872
_refine_ls_goodness_of_fit_ref    1.038
_refine_ls_restrained_S_all       1.062
_refine_ls_shift/su_max           0.026
_refine_ls_shift/su_mean          0.003
 
loop_
 _atom_site_label
 _atom_site_type_symbol
 _atom_site_fract_x
 _atom_site_fract_y
 _atom_site_fract_z
 _atom_site_U_iso_or_equiv
 _atom_site_adp_type
 _atom_site_occupancy
 _atom_site_site_symmetry_order  
 _atom_site_calc_flag
 _atom_site_refinement_flags_posn
 _atom_site_refinement_flags_adp
 _atom_site_refinement_flags_occupancy
 _atom_site_disorder_assembly
 _atom_site_disorder_group
Si1 Si 0.79574(5) 1.15153(3) 0.14770(2) 0.01161(11) Uani 1 1 d . . . . .
Si2 Si 0.69841(5) 1.12248(3) 0.25164(3) 0.01260(11) Uani 1 1 d . . . . .
Si3 Si 0.68942(5) 1.04483(3) 0.18732(3) 0.01326(11) Uani 1 1 d . . . . .
Si4 Si 0.77311(5) 0.98192(3) 0.30486(3) 0.01265(11) Uani 1 1 d . . . . .
Si5 Si 0.87421(5) 0.86249(3) 0.27959(2) 0.01210(11) Uani 1 1 d . . . . .
Si6 Si 0.68960(5) 0.90271(3) 0.22424(2) 0.01173(11) Uani 1 1 d . . . . .
Si7 Si 0.63374(5) 0.89259(3) 0.33333(2) 0.01170(11) Uani 1 1 d . . . . .
Si8 Si 0.80725(5) 0.78577(3) 0.38895(2) 0.01177(11) Uani 1 1 d . . . . .
C1 C 0.94844(17) 1.18510(11) 0.13371(9) 0.0136(4) Uani 1 1 d . . . . .
C2 C 0.89934(18) 1.27683(11) 0.08864(10) 0.0160(4) Uani 1 1 d . . . . .
H1 H 0.8547 1.3082 0.1161 0.019 Uiso 1 1 calc R U . . .
H2 H 0.9668 1.3021 0.0677 0.019 Uiso 1 1 calc R U . . .
C3 C 0.81708(17) 1.28016(11) 0.03492(9) 0.0152(4) Uani 1 1 d . . . . .
H3 H 0.8637 1.2543 0.0043 0.018 Uiso 1 1 calc R U . . .
H4 H 0.7813 1.3379 0.0090 0.018 Uiso 1 1 calc R U . . .
C4 C 0.71536(17) 1.23362(11) 0.06824(9) 0.0130(4) Uani 1 1 d . . . . .
Si9 Si 1.07761(5) 1.14033(3) 0.08615(3) 0.01554(11) Uani 1 1 d . . . . .
C5 C 1.15652(19) 1.22254(13) 0.03511(10) 0.0232(5) Uani 1 1 d . . . . .
H5 H 1.2309 1.1976 0.0178 0.035 Uiso 1 1 calc R U . . .
H6 H 1.1747 1.2516 0.0628 0.035 Uiso 1 1 calc R U . . .
H7 H 1.1051 1.2613 -0.0019 0.035 Uiso 1 1 calc R U . . .
C6 C 1.03702(19) 1.09839(13) 0.02469(10) 0.0200(4) Uani 1 1 d . . . . .
H8 H 0.9899 1.1430 -0.0113 0.030 Uiso 1 1 calc R U . . .
H9 H 0.9900 1.0573 0.0467 0.030 Uiso 1 1 calc R U . . .
H10 H 1.1099 1.0729 0.0065 0.030 Uiso 1 1 calc R U . . .
C7 C 1.19701(19) 1.05683(13) 0.14014(11) 0.0235(5) Uani 1 1 d . . . . .
H11 H 1.1598 1.0173 0.1747 0.035 Uiso 1 1 calc R U . . .
H12 H 1.2442 1.0808 0.1608 0.035 Uiso 1 1 calc R U . . .
H13 H 1.2492 1.0289 0.1130 0.035 Uiso 1 1 calc R U . . .
Si10 Si 1.01156(5) 1.18729(3) 0.21231(3) 0.01642(12) Uani 1 1 d . . . . .
C8 C 0.9090(2) 1.26345(14) 0.24438(12) 0.0274(5) Uani 1 1 d . . . . .
H14 H 0.8277 1.2547 0.2471 0.041 Uiso 1 1 calc R U . . .
H15 H 0.9100 1.3191 0.2143 0.041 Uiso 1 1 calc R U . . .
H16 H 0.9356 1.2564 0.2885 0.041 Uiso 1 1 calc R U . . .
C9 C 1.0402(2) 1.08535(13) 0.28040(10) 0.0235(5) Uani 1 1 d . . . . .
H17 H 1.0790 1.0891 0.3177 0.035 Uiso 1 1 calc R U . . .
H18 H 1.0923 1.0444 0.2641 0.035 Uiso 1 1 calc R U . . .
H19 H 0.9644 1.0691 0.2951 0.035 Uiso 1 1 calc R U . . .
C10 C 1.1532(2) 1.22551(14) 0.19733(11) 0.0259(5) Uani 1 1 d . . . . .
H20 H 1.1401 1.2792 0.1620 0.039 Uiso 1 1 calc R U . . .
H21 H 1.2164 1.1867 0.1841 0.039 Uiso 1 1 calc R U . . .
H22 H 1.1771 1.2306 0.2381 0.039 Uiso 1 1 calc R U . . .
Si11 Si 0.58407(5) 1.31512(3) 0.08033(3) 0.01642(12) Uani 1 1 d . . . . .
C11 C 0.6317(2) 1.38352(12) 0.11765(11) 0.0216(4) Uani 1 1 d . . . . .
H23 H 0.5614 1.4227 0.1248 0.032 Uiso 1 1 calc R U . . .
H24 H 0.6868 1.4133 0.0875 0.032 Uiso 1 1 calc R U . . .
H25 H 0.6717 1.3502 0.1601 0.032 Uiso 1 1 calc R U . . .
C12 C 0.5195(2) 1.38970(12) -0.00213(11) 0.0242(5) Uani 1 1 d . . . . .
H26 H 0.4597 1.4349 0.0049 0.036 Uiso 1 1 calc R U . . .
H27 H 0.4820 1.3615 -0.0238 0.036 Uiso 1 1 calc R U . . .
H28 H 0.5834 1.4114 -0.0303 0.036 Uiso 1 1 calc R U . . .
C13 C 0.45639(18) 1.27476(12) 0.12935(11) 0.0213(4) Uani 1 1 d . . . . .
H29 H 0.4873 1.2222 0.1640 0.032 Uiso 1 1 calc R U . . .
H30 H 0.4033 1.2671 0.0999 0.032 Uiso 1 1 calc R U . . .
H31 H 0.4119 1.3140 0.1498 0.032 Uiso 1 1 calc R U . . .
Si12 Si 0.66518(5) 1.18865(3) 0.00914(3) 0.01480(11) Uani 1 1 d . . . . .
C14 C 0.6797(2) 1.25743(13) -0.07883(10) 0.0241(5) Uani 1 1 d . . . . .
H32 H 0.6578 1.2333 -0.1093 0.036 Uiso 1 1 calc R U . . .
H33 H 0.7624 1.2635 -0.0870 0.036 Uiso 1 1 calc R U . . .
H34 H 0.6266 1.3113 -0.0859 0.036 Uiso 1 1 calc R U . . .
C15 C 0.50639(18) 1.17749(13) 0.02159(11) 0.0216(4) Uani 1 1 d . . . . .
H35 H 0.4897 1.1476 -0.0058 0.032 Uiso 1 1 calc R U . . .
H36 H 0.4527 1.2319 0.0088 0.032 Uiso 1 1 calc R U . . .
H37 H 0.4939 1.1471 0.0683 0.032 Uiso 1 1 calc R U . . .
C16 C 0.75369(19) 1.08634(12) 0.00851(10) 0.0196(4) Uani 1 1 d . . . . .
H38 H 0.7730 1.0496 0.0541 0.029 Uiso 1 1 calc R U . . .
H39 H 0.8276 1.0933 -0.0163 0.029 Uiso 1 1 calc R U . . .
H40 H 0.7066 1.0628 -0.0126 0.029 Uiso 1 1 calc R U . . .
C17 C 0.60555(18) 1.17212(12) 0.31234(10) 0.0168(4) Uani 1 1 d . . . . .
C18 C 0.5740(2) 1.26592(12) 0.28382(11) 0.0248(5) Uani 1 1 d . . . . .
H41 H 0.5297 1.2839 0.2422 0.037 Uiso 1 1 calc R U . . .
H42 H 0.6474 1.2865 0.2754 0.037 Uiso 1 1 calc R U . . .
H43 H 0.5246 1.2874 0.3156 0.037 Uiso 1 1 calc R U . . .
C19 C 0.4895(2) 1.14279(15) 0.32885(13) 0.0363(6) Uani 1 1 d . . . . .
H44 H 0.4457 1.1642 0.3621 0.055 Uiso 1 1 calc R U . . .
H45 H 0.5073 1.0828 0.3464 0.055 Uiso 1 1 calc R U . . .
H46 H 0.4407 1.1625 0.2887 0.055 Uiso 1 1 calc R U . . .
C20 C 0.6772(3) 1.14544(16) 0.37587(12) 0.0397(7) Uani 1 1 d . . . . .
H47 H 0.6328 1.1719 0.4061 0.060 Uiso 1 1 calc R U . . .
H48 H 0.7541 1.1614 0.3653 0.060 Uiso 1 1 calc R U . . .
H49 H 0.6909 1.0858 0.3971 0.060 Uiso 1 1 calc R U . . .
C21 C 1.01588(17) 0.85336(12) 0.22591(10) 0.0157(4) Uani 1 1 d . . . . .
C22 C 0.99535(18) 0.92953(12) 0.16321(10) 0.0192(4) Uani 1 1 d . . . . .
H50 H 0.9832 0.9787 0.1754 0.029 Uiso 1 1 calc R U . . .
H51 H 0.9246 0.9316 0.1398 0.029 Uiso 1 1 calc R U . . .
H52 H 1.0651 0.9271 0.1343 0.029 Uiso 1 1 calc R U . . .
C23 C 1.0300(2) 0.77899(13) 0.20385(11) 0.0236(5) Uani 1 1 d . . . . .
H53 H 0.9570 0.7833 0.1812 0.035 Uiso 1 1 calc R U . . .
H54 H 1.0442 0.7287 0.2427 0.035 Uiso 1 1 calc R U . . .
H55 H 1.0977 0.7775 0.1735 0.035 Uiso 1 1 calc R U . . .
C24 C 1.13155(18) 0.84744(13) 0.25944(10) 0.0213(4) Uani 1 1 d . . . . .
H56 H 1.1987 0.8421 0.2293 0.032 Uiso 1 1 calc R U . . .
H57 H 1.1445 0.7994 0.3001 0.032 Uiso 1 1 calc R U . . .
H58 H 1.1255 0.8970 0.2703 0.032 Uiso 1 1 calc R U . . .
C25 C 0.62205(18) 0.87399(11) 0.15723(9) 0.0158(4) Uani 1 1 d . . . . .
C26 C 0.7227(2) 0.83832(13) 0.11789(10) 0.0228(4) Uani 1 1 d . . . . .
H59 H 0.6884 0.8293 0.0816 0.034 Uiso 1 1 calc R U . . .
H60 H 0.7689 0.7861 0.1473 0.034 Uiso 1 1 calc R U . . .
H61 H 0.7751 0.8768 0.0996 0.034 Uiso 1 1 calc R U . . .
C27 C 0.54589(19) 0.95226(12) 0.10897(10) 0.0201(4) Uani 1 1 d . . . . .
H62 H 0.5100 0.9386 0.0758 0.030 Uiso 1 1 calc R U . . .
H63 H 0.5964 0.9910 0.0868 0.030 Uiso 1 1 calc R U . . .
H64 H 0.4827 0.9772 0.1335 0.030 Uiso 1 1 calc R U . . .
C28 C 0.5418(2) 0.81272(13) 0.18670(11) 0.0224(5) Uani 1 1 d . . . . .
H65 H 0.4695 0.8390 0.2047 0.034 Uiso 1 1 calc R U . . .
H66 H 0.5848 0.7651 0.2222 0.034 Uiso 1 1 calc R U . . .
H67 H 0.5199 0.7949 0.1520 0.034 Uiso 1 1 calc R U . . .
C29 C 0.45980(17) 0.91682(11) 0.34323(9) 0.0148(4) Uani 1 1 d . . . . .
C30 C 0.40407(18) 0.94044(12) 0.40276(10) 0.0179(4) Uani 1 1 d . . . . .
H68 H 0.3171 0.9568 0.3976 0.027 Uiso 1 1 calc R U . . .
H69 H 0.4345 0.9862 0.4050 0.027 Uiso 1 1 calc R U . . .
H70 H 0.4251 0.8934 0.4436 0.027 Uiso 1 1 calc R U . . .
C31 C 0.41144(18) 0.98739(13) 0.27899(10) 0.0204(4) Uani 1 1 d . . . . .
H71 H 0.4287 0.9680 0.2413 0.031 Uiso 1 1 calc R U . . .
H72 H 0.4499 1.0330 0.2722 0.031 Uiso 1 1 calc R U . . .
H73 H 0.3250 1.0059 0.2827 0.031 Uiso 1 1 calc R U . . .
C32 C 0.41397(19) 0.84223(13) 0.34441(11) 0.0219(4) Uani 1 1 d . . . . .
H74 H 0.4325 0.7985 0.3875 0.033 Uiso 1 1 calc R U . . .
H75 H 0.4528 0.8225 0.3092 0.033 Uiso 1 1 calc R U . . .
H76 H 0.3274 0.8581 0.3373 0.033 Uiso 1 1 calc R U . . .
C33 C 0.80775(18) 0.66899(11) 0.42167(9) 0.0152(4) Uani 1 1 d . . . . .
C34 C 0.89616(18) 0.63701(11) 0.48196(10) 0.0178(4) Uani 1 1 d . . . . .
H77 H 0.8841 0.5833 0.5126 0.021 Uiso 1 1 calc R U . . .
H78 H 0.9794 0.6294 0.4659 0.021 Uiso 1 1 calc R U . . .
C35 C 0.87501(18) 0.69799(11) 0.51863(9) 0.0173(4) Uani 1 1 d . . . . .
H79 H 0.9363 0.6801 0.5536 0.021 Uiso 1 1 calc R U . . .
H80 H 0.7958 0.6997 0.5401 0.021 Uiso 1 1 calc R U . . .
C36 C 0.88096(17) 0.78635(11) 0.46879(9) 0.0135(4) Uani 1 1 d . . . . .
Si13 Si 0.87249(5) 0.61067(3) 0.36336(3) 0.01724(12) Uani 1 1 d . . . . .
C37 C 1.0379(2) 0.59921(13) 0.35511(11) 0.0255(5) Uani 1 1 d . . . . .
H81 H 1.0667 0.5760 0.3203 0.038 Uiso 1 1 calc R U . . .
H82 H 1.0764 0.5626 0.3973 0.038 Uiso 1 1 calc R U . . .
H83 H 1.0572 0.6530 0.3434 0.038 Uiso 1 1 calc R U . . .
C38 C 0.8032(2) 0.65986(12) 0.27902(10) 0.0230(5) Uani 1 1 d . . . . .
H84 H 0.7850 0.7196 0.2672 0.035 Uiso 1 1 calc R U . . .
H85 H 0.7294 0.6417 0.2790 0.035 Uiso 1 1 calc R U . . .
H86 H 0.8588 0.6441 0.2466 0.035 Uiso 1 1 calc R U . . .
C39 C 0.8577(2) 0.50103(12) 0.39482(11) 0.0246(5) Uani 1 1 d . . . . .
H87 H 0.8979 0.4735 0.3643 0.037 Uiso 1 1 calc R U . . .
H88 H 0.7730 0.4994 0.3977 0.037 Uiso 1 1 calc R U . . .
H89 H 0.8944 0.4730 0.4388 0.037 Uiso 1 1 calc R U . . .
Si14 Si 0.65865(5) 0.64234(3) 0.45512(3) 0.01867(12) Uani 1 1 d . . . . .
C40 C 0.5651(2) 0.64087(14) 0.38867(12) 0.0271(5) Uani 1 1 d . . . . .
H90 H 0.4836 0.6394 0.4049 0.041 Uiso 1 1 calc R U . . .
H91 H 0.5991 0.5922 0.3766 0.041 Uiso 1 1 calc R U . . .
H92 H 0.5638 0.6902 0.3497 0.041 Uiso 1 1 calc R U . . .
C41 C 0.6807(2) 0.53809(13) 0.52171(12) 0.0312(5) Uani 1 1 d . . . . .
H93 H 0.6041 0.5217 0.5317 0.047 Uiso 1 1 calc R U . . .
H94 H 0.7121 0.5403 0.5618 0.047 Uiso 1 1 calc R U . . .
H95 H 0.7373 0.4981 0.5063 0.047 Uiso 1 1 calc R U . . .
C42 C 0.5659(2) 0.71050(13) 0.49840(11) 0.0242(5) Uani 1 1 d . . . . .
H96 H 0.5614 0.7680 0.4710 0.036 Uiso 1 1 calc R U . . .
H97 H 0.6025 0.6990 0.5412 0.036 Uiso 1 1 calc R U . . .
H98 H 0.4853 0.7001 0.5055 0.036 Uiso 1 1 calc R U . . .
Si15 Si 1.04624(5) 0.79127(3) 0.46340(3) 0.01545(11) Uani 1 1 d . . . . .
C43 C 1.07402(18) 0.89110(12) 0.40495(10) 0.0194(4) Uani 1 1 d . . . . .
H99 H 1.1532 0.8819 0.3852 0.029 Uiso 1 1 calc R U . . .
H100 H 1.0701 0.9289 0.4292 0.029 Uiso 1 1 calc R U . . .
H101 H 1.0133 0.9148 0.3699 0.029 Uiso 1 1 calc R U . . .
C44 C 1.1062(2) 0.77654(15) 0.54700(11) 0.0270(5) Uani 1 1 d . . . . .
H102 H 1.1917 0.7759 0.5434 0.040 Uiso 1 1 calc R U . . .
H103 H 1.0941 0.7244 0.5791 0.040 Uiso 1 1 calc R U . . .
H104 H 1.0641 0.8216 0.5618 0.040 Uiso 1 1 calc R U . . .
C45 C 1.15315(19) 0.70731(12) 0.44211(11) 0.0234(5) Uani 1 1 d . . . . .
H105 H 1.1264 0.7035 0.4015 0.035 Uiso 1 1 calc R U . . .
H106 H 1.1562 0.6552 0.4785 0.035 Uiso 1 1 calc R U . . .
H107 H 1.2328 0.7193 0.4352 0.035 Uiso 1 1 calc R U . . .
Si16 Si 0.80377(5) 0.86260(3) 0.51158(3) 0.01485(11) Uani 1 1 d . . . . .
C46 C 0.86416(19) 0.95682(13) 0.49264(11) 0.0222(4) Uani 1 1 d . . . . .
H108 H 0.8674 0.9837 0.4445 0.033 Uiso 1 1 calc R U . . .
H109 H 0.9446 0.9415 0.5114 0.033 Uiso 1 1 calc R U . . .
H110 H 0.8121 0.9945 0.5121 0.033 Uiso 1 1 calc R U . . .
C47 C 0.8158(2) 0.81087(14) 0.60416(10) 0.0245(5) Uani 1 1 d . . . . .
H111 H 0.7849 0.8515 0.6257 0.037 Uiso 1 1 calc R U . . .
H112 H 0.8996 0.7857 0.6166 0.037 Uiso 1 1 calc R U . . .
H113 H 0.7692 0.7685 0.6183 0.037 Uiso 1 1 calc R U . . .
C48 C 0.64105(18) 0.90259(13) 0.49402(10) 0.0204(4) Uani 1 1 d . . . . .
H114 H 0.6082 0.9401 0.5182 0.031 Uiso 1 1 calc R U . . .
H115 H 0.6008 0.8568 0.5083 0.031 Uiso 1 1 calc R U . . .
H116 H 0.6285 0.9319 0.4464 0.031 Uiso 1 1 calc R U . . .
C49 C 0.4818(3) 0.56176(17) 0.26811(14) 0.0400(6) Uani 1 1 d . . . . .
C50 C 0.5516(3) 0.58488(18) 0.21278(15) 0.0444(7) Uani 1 1 d . . . . .
H117 H 0.5247 0.6355 0.1782 0.053 Uiso 1 1 calc R U . . .
C51 C 0.6605(3) 0.5349(2) 0.20733(19) 0.0598(9) Uani 1 1 d . . . . .
H118 H 0.7078 0.5510 0.1689 0.072 Uiso 1 1 calc R U . . .
C52 C 0.7005(3) 0.4614(2) 0.2578(2) 0.0627(10) Uani 1 1 d . . . . .
H119 H 0.7759 0.4275 0.2545 0.075 Uiso 1 1 calc R U . . .
C53 C 0.6316(3) 0.43805(18) 0.31223(19) 0.0577(9) Uani 1 1 d . . . . .
H120 H 0.6588 0.3874 0.3467 0.069 Uiso 1 1 calc R U . . .
C54 C 0.5227(3) 0.48726(19) 0.31773(16) 0.0502(8) Uani 1 1 d . . . . .
H121 H 0.4752 0.4700 0.3559 0.060 Uiso 1 1 calc R U . . .
C55 C 0.3639(3) 0.6165(2) 0.27407(19) 0.0644(10) Uani 1 1 d . . . . .
H122 H 0.3264 0.5907 0.3162 0.097 Uiso 1 1 calc R U . . .
H123 H 0.3765 0.6694 0.2726 0.097 Uiso 1 1 calc R U . . .
H124 H 0.3118 0.6250 0.2373 0.097 Uiso 1 1 calc R U . . .
C56 C 0.1003(2) 0.54274(14) 0.17685(12) 0.0302(5) Uani 1 1 d . . . . .
C57 C 0.2238(3) 0.52601(15) 0.17331(13) 0.0388(6) Uani 1 1 d . . . . .
H125 H 0.2616 0.5635 0.1401 0.047 Uiso 1 1 calc R U . . .
C58 C 0.2932(3) 0.45612(17) 0.21696(15) 0.0455(7) Uani 1 1 d . . . . .
H126 H 0.3777 0.4462 0.2138 0.055 Uiso 1 1 calc R U . . .
C59 C 0.2395(3) 0.40073(16) 0.26523(15) 0.0439(7) Uani 1 1 d . . . . .
H127 H 0.2869 0.3525 0.2952 0.053 Uiso 1 1 calc R U . . .
C60 C 0.1169(3) 0.41582(15) 0.26962(14) 0.0420(7) Uani 1 1 d . . . . .
H128 H 0.0797 0.3777 0.3025 0.050 Uiso 1 1 calc R U . . .
C61 C 0.0475(2) 0.48669(15) 0.22605(13) 0.0349(6) Uani 1 1 d . . . . .
H129 H -0.0369 0.4970 0.2299 0.042 Uiso 1 1 calc R U . . .
C62 C 0.0684(4) 0.4820(3) 0.0090(3) 0.0386(12) Uani 0.5 1 d D U P A -1
C63 C 0.0505(9) 0.5180(9) -0.0604(4) 0.098(4) Uani 0.5 1 d D U P A -1
H133 H 0.1100 0.5182 -0.0935 0.117 Uiso 0.5 1 calc R U P A -1
C64 C -0.0686(8) 0.5523(4) -0.0708(4) 0.072(2) Uani 0.5 1 d D U P A -1
H134 H -0.0893 0.5791 -0.1163 0.086 Uiso 0.5 1 calc R U P A -1
C65 C -0.1647(9) 0.5561(10) -0.0290(4) 0.080(3) Uani 0.5 1 d D U P A -1
H135 H -0.2427 0.5841 -0.0458 0.096 Uiso 0.5 1 calc R U P A -1
C66 C -0.1439(5) 0.5180(4) 0.0379(4) 0.071(2) Uani 0.5 1 d D U P A -1
H136 H -0.2054 0.5179 0.0700 0.086 Uiso 0.5 1 calc R U P A -1
C67 C -0.0223(5) 0.4784(4) 0.0550(3) 0.0331(16) Uani 0.5 1 d D U P A -1
H137 H -0.0028 0.4482 0.1003 0.040 Uiso 0.5 1 calc R U P A -1
C68 C 0.1964(5) 0.4462(10) 0.0319(5) 0.115(5) Uani 0.5 1 d D U P A -1
H138 H 0.2325 0.4897 0.0340 0.173 Uiso 0.5 1 calc R U P A -1
H139 H 0.2410 0.4215 0.0007 0.173 Uiso 0.5 1 calc R U P A -1
H140 H 0.1987 0.4042 0.0760 0.173 Uiso 0.5 1 calc R U P A -1
C69 C 0.0253(3) 0.61829(15) 0.12823(13) 0.0390(6) Uani 1 1 d . . . . .
H130 H -0.0594 0.6197 0.1385 0.058 Uiso 1 1 calc R U . . .
H131 H 0.0452 0.6672 0.1314 0.058 Uiso 1 1 calc R U . . .
H132 H 0.0411 0.6172 0.0832 0.058 Uiso 1 1 calc R U . . .
 
loop_
 _atom_site_aniso_label
 _atom_site_aniso_U_11
 _atom_site_aniso_U_22
 _atom_site_aniso_U_33
 _atom_site_aniso_U_23
 _atom_site_aniso_U_13
 _atom_site_aniso_U_12
Si1 0.0116(2) 0.0120(2) 0.0116(2) -0.00411(19) 0.00003(19) -0.00312(19)
Si2 0.0135(3) 0.0128(2) 0.0127(2) -0.0059(2) 0.0012(2) -0.00335(19)
Si3 0.0156(3) 0.0133(2) 0.0124(2) -0.0053(2) 0.0011(2) -0.0048(2)
Si4 0.0123(3) 0.0129(2) 0.0133(2) -0.0049(2) 0.0005(2) -0.00343(19)
Si5 0.0112(2) 0.0136(2) 0.0114(2) -0.00434(19) 0.00007(19) -0.00265(19)
Si6 0.0121(2) 0.0130(2) 0.0112(2) -0.00490(19) -0.00076(19) -0.00354(19)
Si7 0.0102(2) 0.0143(2) 0.0112(2) -0.00472(19) 0.00008(19) -0.00318(19)
Si8 0.0118(2) 0.0125(2) 0.0111(2) -0.00336(19) -0.00074(19) -0.00372(19)
C1 0.0122(9) 0.0150(9) 0.0147(9) -0.0055(7) 0.0006(7) -0.0047(7)
C2 0.0147(9) 0.0141(9) 0.0195(10) -0.0042(8) -0.0003(8) -0.0055(7)
C3 0.0158(10) 0.0138(9) 0.0148(9) -0.0034(7) 0.0012(8) -0.0038(7)
C4 0.0142(9) 0.0114(8) 0.0127(9) -0.0025(7) -0.0007(7) -0.0039(7)
Si9 0.0124(3) 0.0194(3) 0.0144(3) -0.0051(2) 0.0009(2) -0.0041(2)
C5 0.0207(11) 0.0294(11) 0.0199(10) -0.0069(9) 0.0053(9) -0.0101(9)
C6 0.0185(10) 0.0239(10) 0.0177(10) -0.0079(8) 0.0011(8) -0.0038(8)
C7 0.0163(10) 0.0265(11) 0.0253(11) -0.0072(9) -0.0027(9) -0.0019(8)
Si10 0.0152(3) 0.0217(3) 0.0149(3) -0.0069(2) -0.0002(2) -0.0079(2)
C8 0.0253(12) 0.0354(12) 0.0293(12) -0.0195(10) -0.0010(10) -0.0081(10)
C9 0.0243(11) 0.0275(11) 0.0180(10) -0.0046(9) -0.0036(9) -0.0085(9)
C10 0.0238(11) 0.0367(12) 0.0231(11) -0.0114(10) 0.0002(9) -0.0166(10)
Si11 0.0156(3) 0.0131(2) 0.0188(3) -0.0044(2) -0.0011(2) -0.0011(2)
C11 0.0248(11) 0.0161(9) 0.0250(11) -0.0090(8) 0.0020(9) -0.0044(8)
C12 0.0253(11) 0.0168(10) 0.0254(11) -0.0039(9) -0.0047(9) 0.0013(8)
C13 0.0168(10) 0.0213(10) 0.0253(11) -0.0086(9) 0.0015(8) -0.0027(8)
Si12 0.0151(3) 0.0160(2) 0.0139(3) -0.0053(2) -0.0018(2) -0.0036(2)
C14 0.0304(12) 0.0268(11) 0.0151(10) -0.0059(9) -0.0013(9) -0.0081(9)
C15 0.0178(10) 0.0245(10) 0.0256(11) -0.0110(9) -0.0035(9) -0.0055(8)
C16 0.0197(10) 0.0213(10) 0.0198(10) -0.0095(8) -0.0008(8) -0.0047(8)
C17 0.0193(10) 0.0169(9) 0.0158(9) -0.0093(8) 0.0032(8) -0.0027(8)
C18 0.0300(12) 0.0187(10) 0.0271(11) -0.0115(9) 0.0057(9) -0.0040(9)
C19 0.0392(15) 0.0359(13) 0.0443(15) -0.0246(12) 0.0258(12) -0.0196(11)
C20 0.0478(16) 0.0433(14) 0.0255(12) -0.0219(11) -0.0090(11) 0.0130(12)
C21 0.0120(9) 0.0177(9) 0.0162(9) -0.0051(8) 0.0016(7) -0.0025(7)
C22 0.0165(10) 0.0221(10) 0.0160(10) -0.0046(8) 0.0033(8) -0.0024(8)
C23 0.0237(11) 0.0224(10) 0.0251(11) -0.0112(9) 0.0061(9) -0.0032(9)
C24 0.0128(10) 0.0289(11) 0.0193(10) -0.0058(9) 0.0002(8) -0.0028(8)
C25 0.0185(10) 0.0166(9) 0.0148(9) -0.0073(8) -0.0025(8) -0.0047(8)
C26 0.0237(11) 0.0299(11) 0.0183(10) -0.0143(9) -0.0018(9) -0.0028(9)
C27 0.0243(11) 0.0208(10) 0.0171(10) -0.0076(8) -0.0067(8) -0.0047(8)
C28 0.0282(12) 0.0225(10) 0.0213(10) -0.0085(9) -0.0040(9) -0.0116(9)
C29 0.0110(9) 0.0189(9) 0.0163(9) -0.0078(8) -0.0001(7) -0.0038(7)
C30 0.0121(9) 0.0243(10) 0.0198(10) -0.0107(8) 0.0034(8) -0.0049(8)
C31 0.0139(10) 0.0276(11) 0.0181(10) -0.0082(8) -0.0029(8) 0.0001(8)
C32 0.0154(10) 0.0285(11) 0.0284(11) -0.0154(9) 0.0014(9) -0.0087(8)
C33 0.0178(10) 0.0139(9) 0.0137(9) -0.0032(7) -0.0027(8) -0.0048(7)
C34 0.0188(10) 0.0152(9) 0.0170(10) -0.0006(8) -0.0053(8) -0.0050(8)
C35 0.0185(10) 0.0172(9) 0.0137(9) 0.0002(8) -0.0032(8) -0.0066(8)
C36 0.0140(9) 0.0149(9) 0.0112(9) -0.0020(7) -0.0012(7) -0.0059(7)
Si13 0.0201(3) 0.0136(2) 0.0176(3) -0.0048(2) -0.0026(2) -0.0030(2)
C37 0.0239(12) 0.0265(11) 0.0260(11) -0.0107(9) -0.0009(9) -0.0025(9)
C38 0.0307(12) 0.0188(10) 0.0192(10) -0.0060(8) -0.0050(9) -0.0039(9)
C39 0.0306(12) 0.0152(9) 0.0272(11) -0.0066(9) -0.0043(9) -0.0034(9)
Si14 0.0175(3) 0.0166(3) 0.0221(3) -0.0047(2) -0.0001(2) -0.0071(2)
C40 0.0213(11) 0.0270(11) 0.0394(13) -0.0176(10) -0.0041(10) -0.0065(9)
C41 0.0306(13) 0.0233(11) 0.0351(13) -0.0015(10) 0.0049(10) -0.0117(10)
C42 0.0202(11) 0.0282(11) 0.0266(11) -0.0112(9) 0.0020(9) -0.0079(9)
Si15 0.0127(3) 0.0182(3) 0.0154(3) -0.0043(2) -0.0018(2) -0.0049(2)
C43 0.0155(10) 0.0218(10) 0.0226(10) -0.0073(8) 0.0020(8) -0.0084(8)
C44 0.0208(11) 0.0369(12) 0.0217(11) -0.0055(9) -0.0070(9) -0.0084(9)
C45 0.0159(10) 0.0208(10) 0.0319(12) -0.0078(9) 0.0005(9) -0.0035(8)
Si16 0.0152(3) 0.0191(3) 0.0123(2) -0.0066(2) 0.0002(2) -0.0060(2)
C46 0.0223(11) 0.0246(11) 0.0251(11) -0.0132(9) 0.0011(9) -0.0087(9)
C47 0.0258(12) 0.0346(12) 0.0141(10) -0.0089(9) 0.0010(9) -0.0080(9)
C48 0.0183(10) 0.0259(10) 0.0206(10) -0.0134(9) 0.0008(8) -0.0037(8)
C49 0.0392(15) 0.0451(15) 0.0467(16) -0.0286(13) -0.0127(13) -0.0059(12)
C50 0.0499(18) 0.0424(15) 0.0494(17) -0.0233(13) -0.0105(14) -0.0109(13)
C51 0.052(2) 0.079(2) 0.078(2) -0.056(2) 0.0131(18) -0.0306(18)
C52 0.0416(18) 0.056(2) 0.115(3) -0.064(2) -0.016(2) 0.0016(15)
C53 0.068(2) 0.0343(15) 0.079(2) -0.0271(16) -0.030(2) -0.0056(15)
C54 0.062(2) 0.0530(18) 0.0470(17) -0.0246(14) -0.0081(15) -0.0200(16)
C55 0.0467(19) 0.086(3) 0.070(2) -0.048(2) -0.0123(17) 0.0042(17)
C56 0.0446(15) 0.0244(11) 0.0273(12) -0.0139(10) 0.0058(11) -0.0120(10)
C57 0.0483(17) 0.0325(13) 0.0402(15) -0.0124(11) 0.0091(13) -0.0210(12)
C58 0.0390(16) 0.0398(15) 0.0604(19) -0.0189(14) 0.0035(14) -0.0125(12)
C59 0.0464(17) 0.0323(13) 0.0479(16) -0.0089(12) -0.0028(13) -0.0057(12)
C60 0.0513(17) 0.0285(13) 0.0397(15) -0.0037(11) 0.0102(13) -0.0123(12)
C61 0.0381(14) 0.0304(12) 0.0354(13) -0.0110(11) 0.0097(11) -0.0097(11)
C62 0.037(3) 0.025(2) 0.055(3) -0.012(2) -0.001(2) -0.014(2)
C63 0.126(6) 0.076(5) 0.097(6) -0.030(4) -0.024(4) -0.027(4)
C64 0.106(4) 0.047(3) 0.084(4) -0.038(3) -0.002(4) -0.032(3)
C65 0.080(5) 0.055(5) 0.117(5) -0.037(4) -0.032(4) -0.016(4)
C66 0.074(4) 0.070(3) 0.102(4) -0.055(3) 0.038(3) -0.048(3)
C67 0.055(3) 0.021(3) 0.032(3) -0.013(2) 0.016(2) -0.024(2)
C68 0.104(8) 0.047(5) 0.208(10) -0.053(6) -0.025(6) -0.020(6)
C69 0.0554(18) 0.0288(12) 0.0330(13) -0.0107(11) 0.0054(12) -0.0115(12)
 
_geom_special_details
;
 All esds (except the esd in the dihedral angle between two l.s. planes)
 are estimated using the full covariance matrix.  The cell esds are taken
 into account individually in the estimation of esds in distances, angles
 and torsion angles; correlations between esds in cell parameters are only
 used when they are defined by crystal symmetry.  An approximate (isotropic)
 treatment of cell esds is used for estimating esds involving l.s. planes.
;
 
loop_
 _geom_bond_atom_site_label_1
 _geom_bond_atom_site_label_2
 _geom_bond_distance
 _geom_bond_site_symmetry_2
 _geom_bond_publ_flag
Si1 C4 1.9471(18) . ?
Si1 C1 1.959(2) . ?
Si1 Si2 2.3684(8) . ?
Si1 Si3 2.3798(8) . ?
Si2 C17 1.948(2) . ?
Si2 Si3 2.3037(8) . ?
Si2 Si4 2.3422(8) . ?
Si3 Si6 2.3808(8) . ?
Si3 Si4 2.5477(8) . ?
Si4 Si5 2.4005(8) . ?
Si4 Si7 2.4240(7) . ?
Si5 C21 1.935(2) . ?
Si5 Si6 2.3563(8) . ?
Si5 Si8 2.4441(8) . ?
Si6 C25 1.961(2) . ?
Si6 Si7 2.3440(8) . ?
Si7 C29 1.961(2) . ?
Si7 Si8 2.4618(7) . ?
Si8 C33 1.9540(19) . ?
Si8 C36 1.983(2) . ?
C1 C2 1.576(2) . ?
C1 Si10 1.913(2) . ?
C1 Si9 1.920(2) . ?
C2 C3 1.531(3) . ?
C3 C4 1.578(3) . ?
C4 Si11 1.911(2) . ?
C4 Si12 1.914(2) . ?
Si9 C6 1.871(2) . ?
Si9 C5 1.880(2) . ?
Si9 C7 1.883(2) . ?
Si10 C9 1.871(2) . ?
Si10 C8 1.873(2) . ?
Si10 C10 1.878(2) . ?
Si11 C11 1.877(2) . ?
Si11 C13 1.877(2) . ?
Si11 C12 1.889(2) . ?
Si12 C15 1.877(2) . ?
Si12 C16 1.878(2) . ?
Si12 C14 1.883(2) . ?
C17 C19 1.522(3) . ?
C17 C20 1.523(3) . ?
C17 C18 1.532(3) . ?
C21 C22 1.531(3) . ?
C21 C24 1.532(3) . ?
C21 C23 1.534(3) . ?
C25 C26 1.533(3) . ?
C25 C27 1.535(3) . ?
C25 C28 1.535(3) . ?
C29 C30 1.537(3) . ?
C29 C32 1.538(3) . ?
C29 C31 1.544(3) . ?
C33 C34 1.571(3) . ?
C33 Si13 1.906(2) . ?
C33 Si14 1.911(2) . ?
C34 C35 1.525(3) . ?
C35 C36 1.582(2) . ?
C36 Si16 1.920(2) . ?
C36 Si15 1.921(2) . ?
Si13 C38 1.869(2) . ?
Si13 C37 1.871(2) . ?
Si13 C39 1.881(2) . ?
Si14 C40 1.871(2) . ?
Si14 C42 1.878(2) . ?
Si14 C41 1.885(2) . ?
Si15 C43 1.871(2) . ?
Si15 C45 1.873(2) . ?
Si15 C44 1.891(2) . ?
Si16 C48 1.862(2) . ?
Si16 C46 1.875(2) . ?
Si16 C47 1.883(2) . ?
C49 C50 1.378(4) . ?
C49 C54 1.387(4) . ?
C49 C55 1.502(4) . ?
C50 C51 1.383(5) . ?
C51 C52 1.383(5) . ?
C52 C53 1.359(5) . ?
C53 C54 1.377(5) . ?
C56 C57 1.387(4) . ?
C56 C61 1.392(3) . ?
C56 C69 1.507(3) . ?
C57 C58 1.382(4) . ?
C58 C59 1.382(4) . ?
C59 C60 1.377(4) . ?
C60 C61 1.391(4) . ?
C62 C67 1.381(4) . ?
C62 C63 1.414(5) . ?
C62 C68 1.510(4) . ?
C63 C64 1.367(5) . ?
C64 C65 1.377(5) . ?
C65 C66 1.375(5) . ?
C66 C67 1.427(5) . ?
 
loop_
 _geom_angle_atom_site_label_1
 _geom_angle_atom_site_label_2
 _geom_angle_atom_site_label_3
 _geom_angle
 _geom_angle_site_symmetry_1
 _geom_angle_site_symmetry_3
 _geom_angle_publ_flag
C4 Si1 C1 97.39(8) . . ?
C4 Si1 Si2 121.05(6) . . ?
C1 Si1 Si2 122.17(6) . . ?
C4 Si1 Si3 108.12(6) . . ?
C1 Si1 Si3 148.98(6) . . ?
Si2 Si1 Si3 58.05(2) . . ?
C17 Si2 Si3 142.77(7) . . ?
C17 Si2 Si4 111.13(6) . . ?
Si3 Si2 Si4 66.50(3) . . ?
C17 Si2 Si1 143.82(6) . . ?
Si3 Si2 Si1 61.22(2) . . ?
Si4 Si2 Si1 103.87(3) . . ?
Si2 Si3 Si1 60.73(2) . . ?
Si2 Si3 Si6 127.39(3) . . ?
Si1 Si3 Si6 149.57(3) . . ?
Si2 Si3 Si4 57.47(2) . . ?
Si1 Si3 Si4 97.59(3) . . ?
Si6 Si3 Si4 72.91(2) . . ?
Si2 Si4 Si5 140.10(3) . . ?
Si2 Si4 Si7 118.07(3) . . ?
Si5 Si4 Si7 74.61(2) . . ?
Si2 Si4 Si3 56.02(2) . . ?
Si5 Si4 Si3 88.67(3) . . ?
Si7 Si4 Si3 89.28(2) . . ?
C21 Si5 Si6 116.58(6) . . ?
C21 Si5 Si4 126.16(6) . . ?
Si6 Si5 Si4 76.09(2) . . ?
C21 Si5 Si8 137.13(6) . . ?
Si6 Si5 Si8 97.50(3) . . ?
Si4 Si5 Si8 85.11(3) . . ?
C25 Si6 Si7 132.34(7) . . ?
C25 Si6 Si5 135.68(7) . . ?
Si7 Si6 Si5 76.94(2) . . ?
C25 Si6 Si3 111.58(6) . . ?
Si7 Si6 Si3 95.39(3) . . ?
Si5 Si6 Si3 93.83(3) . . ?
C29 Si7 Si6 111.65(6) . . ?
C29 Si7 Si4 130.75(6) . . ?
Si6 Si7 Si4 75.86(2) . . ?
C29 Si7 Si8 138.16(6) . . ?
Si6 Si7 Si8 97.34(3) . . ?
Si4 Si7 Si8 84.23(3) . . ?
C33 Si8 C36 96.42(8) . . ?
C33 Si8 Si5 125.72(6) . . ?
C36 Si8 Si5 118.90(6) . . ?
C33 Si8 Si7 122.98(6) . . ?
C36 Si8 Si7 121.75(6) . . ?
Si5 Si8 Si7 73.17(2) . . ?
C2 C1 Si10 107.11(12) . . ?
C2 C1 Si9 106.60(12) . . ?
Si10 C1 Si9 108.39(9) . . ?
C2 C1 Si1 97.06(12) . . ?
Si10 C1 Si1 113.36(10) . . ?
Si9 C1 Si1 122.49(10) . . ?
C3 C2 C1 109.94(15) . . ?
C2 C3 C4 109.54(15) . . ?
C3 C4 Si11 105.89(12) . . ?
C3 C4 Si12 109.81(13) . . ?
Si11 C4 Si12 107.93(9) . . ?
C3 C4 Si1 101.46(12) . . ?
Si11 C4 Si1 117.16(10) . . ?
Si12 C4 Si1 113.96(9) . . ?
C6 Si9 C5 103.87(10) . . ?
C6 Si9 C7 105.55(10) . . ?
C5 Si9 C7 105.12(10) . . ?
C6 Si9 C1 116.67(9) . . ?
C5 Si9 C1 109.88(9) . . ?
C7 Si9 C1 114.63(9) . . ?
C9 Si10 C8 108.38(11) . . ?
C9 Si10 C10 108.02(10) . . ?
C8 Si10 C10 102.47(11) . . ?
C9 Si10 C1 113.23(9) . . ?
C8 Si10 C1 111.09(10) . . ?
C10 Si10 C1 113.02(9) . . ?
C11 Si11 C13 109.15(10) . . ?
C11 Si11 C12 102.40(10) . . ?
C13 Si11 C12 106.21(10) . . ?
C11 Si11 C4 112.16(9) . . ?
C13 Si11 C4 115.14(9) . . ?
C12 Si11 C4 110.87(9) . . ?
C15 Si12 C16 105.05(9) . . ?
C15 Si12 C14 107.67(10) . . ?
C16 Si12 C14 102.57(10) . . ?
C15 Si12 C4 113.61(9) . . ?
C16 Si12 C4 117.78(9) . . ?
C14 Si12 C4 109.22(9) . . ?
C19 C17 C20 109.0(2) . . ?
C19 C17 C18 107.90(18) . . ?
C20 C17 C18 108.62(18) . . ?
C19 C17 Si2 109.44(14) . . ?
C20 C17 Si2 108.76(15) . . ?
C18 C17 Si2 113.07(14) . . ?
C22 C21 C24 109.00(16) . . ?
C22 C21 C23 106.97(17) . . ?
C24 C21 C23 109.13(17) . . ?
C22 C21 Si5 106.85(13) . . ?
C24 C21 Si5 114.75(14) . . ?
C23 C21 Si5 109.83(14) . . ?
C26 C25 C27 108.23(16) . . ?
C26 C25 C28 109.10(17) . . ?
C27 C25 C28 107.67(17) . . ?
C26 C25 Si6 109.88(14) . . ?
C27 C25 Si6 108.60(13) . . ?
C28 C25 Si6 113.23(13) . . ?
C30 C29 C32 107.10(16) . . ?
C30 C29 C31 108.55(16) . . ?
C32 C29 C31 106.84(16) . . ?
C30 C29 Si7 119.72(13) . . ?
C32 C29 Si7 108.46(13) . . ?
C31 C29 Si7 105.54(13) . . ?
C34 C33 Si13 107.00(13) . . ?
C34 C33 Si14 107.60(13) . . ?
Si13 C33 Si14 109.15(10) . . ?
C34 C33 Si8 100.82(12) . . ?
Si13 C33 Si8 116.00(10) . . ?
Si14 C33 Si8 115.30(10) . . ?
C35 C34 C33 110.22(16) . . ?
C34 C35 C36 110.28(16) . . ?
C35 C36 Si16 106.67(13) . . ?
C35 C36 Si15 106.14(12) . . ?
Si16 C36 Si15 105.25(9) . . ?
C35 C36 Si8 100.45(12) . . ?
Si16 C36 Si8 119.69(10) . . ?
Si15 C36 Si8 117.31(10) . . ?
C38 Si13 C37 108.95(10) . . ?
C38 Si13 C39 107.26(10) . . ?
C37 Si13 C39 102.11(10) . . ?
C38 Si13 C33 112.67(9) . . ?
C37 Si13 C33 111.60(10) . . ?
C39 Si13 C33 113.63(10) . . ?
C40 Si14 C42 108.22(10) . . ?
C40 Si14 C41 107.08(11) . . ?
C42 Si14 C41 102.41(11) . . ?
C40 Si14 C33 111.87(10) . . ?
C42 Si14 C33 115.10(9) . . ?
C41 Si14 C33 111.48(10) . . ?
C43 Si15 C45 107.60(10) . . ?
C43 Si15 C44 106.83(10) . . ?
C45 Si15 C44 100.70(11) . . ?
C43 Si15 C36 113.21(9) . . ?
C45 Si15 C36 116.21(9) . . ?
C44 Si15 C36 111.22(9) . . ?
C48 Si16 C46 104.30(10) . . ?
C48 Si16 C47 105.25(10) . . ?
C46 Si16 C47 105.66(10) . . ?
C48 Si16 C36 114.53(9) . . ?
C46 Si16 C36 116.42(9) . . ?
C47 Si16 C36 109.75(9) . . ?
C50 C49 C54 118.6(3) . . ?
C50 C49 C55 120.3(3) . . ?
C54 C49 C55 121.1(3) . . ?
C49 C50 C51 120.5(3) . . ?
C52 C51 C50 120.0(3) . . ?
C53 C52 C51 119.7(3) . . ?
C52 C53 C54 120.5(3) . . ?
C53 C54 C49 120.6(3) . . ?
C57 C56 C61 117.9(2) . . ?
C57 C56 C69 121.2(2) . . ?
C61 C56 C69 120.9(2) . . ?
C58 C57 C56 121.5(2) . . ?
C57 C58 C59 119.9(3) . . ?
C60 C59 C58 119.6(3) . . ?
C59 C60 C61 120.2(2) . . ?
C60 C61 C56 120.8(3) . . ?
C67 C62 C63 124.2(5) . . ?
C67 C62 C68 119.8(4) . . ?
C63 C62 C68 116.0(4) . . ?
C64 C63 C62 107.2(8) . . ?
C63 C64 C65 133.3(10) . . ?
C66 C65 C64 117.7(9) . . ?
C65 C66 C67 114.3(7) . . ?
C62 C67 C66 123.2(5) . . ?
 
loop_
 _geom_torsion_atom_site_label_1
 _geom_torsion_atom_site_label_2
 _geom_torsion_atom_site_label_3
 _geom_torsion_atom_site_label_4
 _geom_torsion
 _geom_torsion_site_symmetry_1
 _geom_torsion_site_symmetry_2
 _geom_torsion_site_symmetry_3
 _geom_torsion_site_symmetry_4
 _geom_torsion_publ_flag
C4 Si1 Si2 C17 -48.98(14) . . . . ?
C1 Si1 Si2 C17 74.80(13) . . . . ?
Si3 Si1 Si2 C17 -141.99(12) . . . . ?
C4 Si1 Si2 Si3 93.01(7) . . . . ?
C1 Si1 Si2 Si3 -143.21(7) . . . . ?
C4 Si1 Si2 Si4 145.84(7) . . . . ?
C1 Si1 Si2 Si4 -90.37(7) . . . . ?
Si3 Si1 Si2 Si4 52.83(3) . . . . ?
C17 Si2 Si3 Si1 143.07(10) . . . . ?
Si4 Si2 Si3 Si1 -122.48(3) . . . . ?
C17 Si2 Si3 Si6 -72.27(11) . . . . ?
Si4 Si2 Si3 Si6 22.18(4) . . . . ?
Si1 Si2 Si3 Si6 144.66(4) . . . . ?
C17 Si2 Si3 Si4 -94.45(10) . . . . ?
Si1 Si2 Si3 Si4 122.48(3) . . . . ?
C4 Si1 Si3 Si2 -115.81(7) . . . . ?
C1 Si1 Si3 Si2 100.40(12) . . . . ?
C4 Si1 Si3 Si6 129.35(8) . . . . ?
C1 Si1 Si3 Si6 -14.44(15) . . . . ?
Si2 Si1 Si3 Si6 -114.84(6) . . . . ?
C4 Si1 Si3 Si4 -161.67(6) . . . . ?
C1 Si1 Si3 Si4 54.55(12) . . . . ?
Si2 Si1 Si3 Si4 -45.85(2) . . . . ?
C17 Si2 Si4 Si5 171.54(7) . . . . ?
Si3 Si2 Si4 Si5 31.84(5) . . . . ?
Si1 Si2 Si4 Si5 -17.77(5) . . . . ?
C17 Si2 Si4 Si7 71.83(7) . . . . ?
Si3 Si2 Si4 Si7 -67.88(3) . . . . ?
Si1 Si2 Si4 Si7 -117.49(3) . . . . ?
C17 Si2 Si4 Si3 139.71(7) . . . . ?
Si1 Si2 Si4 Si3 -49.61(3) . . . . ?
Si2 Si4 Si5 C21 49.15(9) . . . . ?
Si7 Si4 Si5 C21 164.71(8) . . . . ?
Si3 Si4 Si5 C21 75.10(8) . . . . ?
Si2 Si4 Si5 Si6 -63.80(5) . . . . ?
Si7 Si4 Si5 Si6 51.77(2) . . . . ?
Si3 Si4 Si5 Si6 -37.85(2) . . . . ?
Si2 Si4 Si5 Si8 -162.78(4) . . . . ?
Si7 Si4 Si5 Si8 -47.22(2) . . . . ?
Si3 Si4 Si5 Si8 -136.83(2) . . . . ?
C21 Si5 Si6 C25 43.96(11) . . . . ?
Si4 Si5 Si6 C25 167.73(9) . . . . ?
Si8 Si5 Si6 C25 -109.23(9) . . . . ?
C21 Si5 Si6 Si7 -177.28(7) . . . . ?
Si4 Si5 Si6 Si7 -53.51(2) . . . . ?
Si8 Si5 Si6 Si7 29.53(2) . . . . ?
C21 Si5 Si6 Si3 -82.63(7) . . . . ?
Si4 Si5 Si6 Si3 41.14(2) . . . . ?
Si8 Si5 Si6 Si3 124.18(3) . . . . ?
Si2 Si3 Si6 C25 158.64(7) . . . . ?
Si1 Si3 Si6 C25 -106.42(9) . . . . ?
Si4 Si3 Si6 C25 178.09(7) . . . . ?
Si2 Si3 Si6 Si7 18.75(4) . . . . ?
Si1 Si3 Si6 Si7 113.69(6) . . . . ?
Si4 Si3 Si6 Si7 38.21(2) . . . . ?
Si2 Si3 Si6 Si5 -58.46(4) . . . . ?
Si1 Si3 Si6 Si5 36.47(6) . . . . ?
Si4 Si3 Si6 Si5 -39.01(2) . . . . ?
C25 Si6 Si7 C29 -37.08(11) . . . . ?
Si5 Si6 Si7 C29 -178.53(6) . . . . ?
Si3 Si6 Si7 C29 88.78(7) . . . . ?
C25 Si6 Si7 Si4 -165.70(8) . . . . ?
Si5 Si6 Si7 Si4 52.84(2) . . . . ?
Si3 Si6 Si7 Si4 -39.85(2) . . . . ?
C25 Si6 Si7 Si8 112.17(8) . . . . ?
Si5 Si6 Si7 Si8 -29.29(2) . . . . ?
Si3 Si6 Si7 Si8 -121.98(3) . . . . ?
Si2 Si4 Si7 C29 -19.77(9) . . . . ?
Si5 Si4 Si7 C29 -158.79(8) . . . . ?
Si3 Si4 Si7 C29 -69.97(8) . . . . ?
Si2 Si4 Si7 Si6 86.80(3) . . . . ?
Si5 Si4 Si7 Si6 -52.22(2) . . . . ?
Si3 Si4 Si7 Si6 36.60(2) . . . . ?
Si2 Si4 Si7 Si8 -174.12(3) . . . . ?
Si5 Si4 Si7 Si8 46.86(2) . . . . ?
Si3 Si4 Si7 Si8 135.68(2) . . . . ?
C21 Si5 Si8 C33 -53.29(13) . . . . ?
Si6 Si5 Si8 C33 90.34(8) . . . . ?
Si4 Si5 Si8 C33 165.59(8) . . . . ?
C21 Si5 Si8 C36 70.38(12) . . . . ?
Si6 Si5 Si8 C36 -145.98(7) . . . . ?
Si4 Si5 Si8 C36 -70.74(7) . . . . ?
C21 Si5 Si8 Si7 -172.16(10) . . . . ?
Si6 Si5 Si8 Si7 -28.53(2) . . . . ?
Si4 Si5 Si8 Si7 46.71(2) . . . . ?
C29 Si7 Si8 C33 41.17(12) . . . . ?
Si6 Si7 Si8 C33 -93.38(8) . . . . ?
Si4 Si7 Si8 C33 -168.28(8) . . . . ?
C29 Si7 Si8 C36 -82.77(12) . . . . ?
Si6 Si7 Si8 C36 142.67(7) . . . . ?
Si4 Si7 Si8 C36 67.77(7) . . . . ?
C29 Si7 Si8 Si5 163.24(9) . . . . ?
Si6 Si7 Si8 Si5 28.68(2) . . . . ?
Si4 Si7 Si8 Si5 -46.21(2) . . . . ?
C4 Si1 C1 C2 24.39(13) . . . . ?
Si2 Si1 C1 C2 -109.72(11) . . . . ?
Si3 Si1 C1 C2 169.90(10) . . . . ?
C4 Si1 C1 Si10 136.50(10) . . . . ?
Si2 Si1 C1 Si10 2.39(12) . . . . ?
Si3 Si1 C1 Si10 -77.99(15) . . . . ?
C4 Si1 C1 Si9 -90.46(12) . . . . ?
Si2 Si1 C1 Si9 135.43(8) . . . . ?
Si3 Si1 C1 Si9 55.05(18) . . . . ?
Si10 C1 C2 C3 -164.09(13) . . . . ?
Si9 C1 C2 C3 80.05(16) . . . . ?
Si1 C1 C2 C3 -46.95(16) . . . . ?
C1 C2 C3 C4 54.9(2) . . . . ?
C2 C3 C4 Si11 92.98(15) . . . . ?
C2 C3 C4 Si12 -150.73(13) . . . . ?
C2 C3 C4 Si1 -29.84(17) . . . . ?
C1 Si1 C4 C3 1.78(13) . . . . ?
Si2 Si1 C4 C3 136.60(10) . . . . ?
Si3 Si1 C4 C3 -160.34(10) . . . . ?
C1 Si1 C4 Si11 -112.93(11) . . . . ?
Si2 Si1 C4 Si11 21.88(13) . . . . ?
Si3 Si1 C4 Si11 84.95(10) . . . . ?
C1 Si1 C4 Si12 119.72(10) . . . . ?
Si2 Si1 C4 Si12 -105.46(9) . . . . ?
Si3 Si1 C4 Si12 -42.40(11) . . . . ?
C2 C1 Si9 C6 -85.29(14) . . . . ?
Si10 C1 Si9 C6 159.71(9) . . . . ?
Si1 C1 Si9 C6 24.71(15) . . . . ?
C2 C1 Si9 C5 32.54(15) . . . . ?
Si10 C1 Si9 C5 -82.46(11) . . . . ?
Si1 C1 Si9 C5 142.54(11) . . . . ?
C2 C1 Si9 C7 150.63(13) . . . . ?
Si10 C1 Si9 C7 35.63(13) . . . . ?
Si1 C1 Si9 C7 -99.37(13) . . . . ?
C2 C1 Si10 C9 166.04(13) . . . . ?
Si9 C1 Si10 C9 -79.29(12) . . . . ?
Si1 C1 Si10 C9 60.19(13) . . . . ?
C2 C1 Si10 C8 43.81(15) . . . . ?
Si9 C1 Si10 C8 158.47(10) . . . . ?
Si1 C1 Si10 C8 -62.04(13) . . . . ?
C2 C1 Si10 C10 -70.73(15) . . . . ?
Si9 C1 Si10 C10 43.93(13) . . . . ?
Si1 C1 Si10 C10 -176.58(10) . . . . ?
C3 C4 Si11 C11 -46.82(15) . . . . ?
Si12 C4 Si11 C11 -164.37(9) . . . . ?
Si1 C4 Si11 C11 65.41(13) . . . . ?
C3 C4 Si11 C13 -172.43(12) . . . . ?
Si12 C4 Si11 C13 70.02(12) . . . . ?
Si1 C4 Si11 C13 -60.20(13) . . . . ?
C3 C4 Si11 C12 66.98(15) . . . . ?
Si12 C4 Si11 C12 -50.57(12) . . . . ?
Si1 C4 Si11 C12 179.21(10) . . . . ?
C3 C4 Si12 C15 -152.32(12) . . . . ?
Si11 C4 Si12 C15 -37.32(12) . . . . ?
Si1 C4 Si12 C15 94.65(12) . . . . ?
C3 C4 Si12 C16 84.28(14) . . . . ?
Si11 C4 Si12 C16 -160.72(9) . . . . ?
Si1 C4 Si12 C16 -28.75(14) . . . . ?
C3 C4 Si12 C14 -32.10(15) . . . . ?
Si11 C4 Si12 C14 82.90(11) . . . . ?
Si1 C4 Si12 C14 -145.13(11) . . . . ?
Si3 Si2 C17 C19 8.4(2) . . . . ?
Si4 Si2 C17 C19 -70.17(16) . . . . ?
Si1 Si2 C17 C19 125.27(15) . . . . ?
Si3 Si2 C17 C20 127.38(16) . . . . ?
Si4 Si2 C17 C20 48.79(17) . . . . ?
Si1 Si2 C17 C20 -115.77(16) . . . . ?
Si3 Si2 C17 C18 -111.88(15) . . . . ?
Si4 Si2 C17 C18 169.53(13) . . . . ?
Si1 Si2 C17 C18 5.0(2) . . . . ?
Si6 Si5 C21 C22 45.11(15) . . . . ?
Si4 Si5 C21 C22 -46.76(16) . . . . ?
Si8 Si5 C21 C22 -175.99(10) . . . . ?
Si6 Si5 C21 C24 166.06(12) . . . . ?
Si4 Si5 C21 C24 74.19(15) . . . . ?
Si8 Si5 C21 C24 -55.04(18) . . . . ?
Si6 Si5 C21 C23 -70.58(14) . . . . ?
Si4 Si5 C21 C23 -162.45(11) . . . . ?
Si8 Si5 C21 C23 68.32(17) . . . . ?
Si7 Si6 C25 C26 -142.10(11) . . . . ?
Si5 Si6 C25 C26 -22.42(18) . . . . ?
Si3 Si6 C25 C26 98.09(13) . . . . ?
Si7 Si6 C25 C27 99.69(14) . . . . ?
Si5 Si6 C25 C27 -140.63(11) . . . . ?
Si3 Si6 C25 C27 -20.12(15) . . . . ?
Si7 Si6 C25 C28 -19.84(18) . . . . ?
Si5 Si6 C25 C28 99.85(15) . . . . ?
Si3 Si6 C25 C28 -139.64(13) . . . . ?
Si6 Si7 C29 C30 -160.62(13) . . . . ?
Si4 Si7 C29 C30 -70.90(16) . . . . ?
Si8 Si7 C29 C30 68.88(18) . . . . ?
Si6 Si7 C29 C32 76.19(14) . . . . ?
Si4 Si7 C29 C32 165.91(10) . . . . ?
Si8 Si7 C29 C32 -54.32(17) . . . . ?
Si6 Si7 C29 C31 -38.01(14) . . . . ?
Si4 Si7 C29 C31 51.71(16) . . . . ?
Si8 Si7 C29 C31 -168.51(10) . . . . ?
C36 Si8 C33 C34 -15.11(14) . . . . ?
Si5 Si8 C33 C34 117.74(11) . . . . ?
Si7 Si8 C33 C34 -149.89(10) . . . . ?
C36 Si8 C33 Si13 -130.22(11) . . . . ?
Si5 Si8 C33 Si13 2.62(14) . . . . ?
Si7 Si8 C33 Si13 95.00(10) . . . . ?
C36 Si8 C33 Si14 100.41(11) . . . . ?
Si5 Si8 C33 Si14 -126.74(8) . . . . ?
Si7 Si8 C33 Si14 -34.37(13) . . . . ?
Si13 C33 C34 C35 161.25(13) . . . . ?
Si14 C33 C34 C35 -81.56(16) . . . . ?
Si8 C33 C34 C35 39.58(17) . . . . ?
C33 C34 C35 C36 -53.5(2) . . . . ?
C34 C35 C36 Si16 161.55(13) . . . . ?
C34 C35 C36 Si15 -86.59(16) . . . . ?
C34 C35 C36 Si8 36.03(17) . . . . ?
C33 Si8 C36 C35 -10.70(13) . . . . ?
Si5 Si8 C36 C35 -147.87(10) . . . . ?
Si7 Si8 C36 C35 124.85(11) . . . . ?
C33 Si8 C36 Si16 -126.86(11) . . . . ?
Si5 Si8 C36 Si16 95.97(10) . . . . ?
Si7 Si8 C36 Si16 8.69(13) . . . . ?
C33 Si8 C36 Si15 103.71(11) . . . . ?
Si5 Si8 C36 Si15 -33.45(12) . . . . ?
Si7 Si8 C36 Si15 -120.74(9) . . . . ?
C34 C33 Si13 C38 -164.18(13) . . . . ?
Si14 C33 Si13 C38 79.66(12) . . . . ?
Si8 C33 Si13 C38 -52.61(14) . . . . ?
C34 C33 Si13 C37 -41.24(15) . . . . ?
Si14 C33 Si13 C37 -157.40(10) . . . . ?
Si8 C33 Si13 C37 70.33(13) . . . . ?
C34 C33 Si13 C39 73.56(15) . . . . ?
Si14 C33 Si13 C39 -42.60(13) . . . . ?
Si8 C33 Si13 C39 -174.87(10) . . . . ?
C34 C33 Si14 C40 -158.97(13) . . . . ?
Si13 C33 Si14 C40 -43.19(12) . . . . ?
Si8 C33 Si14 C40 89.45(12) . . . . ?
C34 C33 Si14 C42 76.97(15) . . . . ?
Si13 C33 Si14 C42 -167.25(10) . . . . ?
Si8 C33 Si14 C42 -34.61(14) . . . . ?
C34 C33 Si14 C41 -39.10(16) . . . . ?
Si13 C33 Si14 C41 76.68(13) . . . . ?
Si8 C33 Si14 C41 -150.68(11) . . . . ?
C35 C36 Si15 C43 178.79(13) . . . . ?
Si16 C36 Si15 C43 -68.36(11) . . . . ?
Si8 C36 Si15 C43 67.57(13) . . . . ?
C35 C36 Si15 C45 53.49(16) . . . . ?
Si16 C36 Si15 C45 166.34(9) . . . . ?
Si8 C36 Si15 C45 -57.73(13) . . . . ?
C35 C36 Si15 C44 -60.92(15) . . . . ?
Si16 C36 Si15 C44 51.93(12) . . . . ?
Si8 C36 Si15 C44 -172.14(11) . . . . ?
C35 C36 Si16 C48 -91.07(14) . . . . ?
Si15 C36 Si16 C48 156.46(9) . . . . ?
Si8 C36 Si16 C48 21.80(14) . . . . ?
C35 C36 Si16 C46 146.94(13) . . . . ?
Si15 C36 Si16 C46 34.46(12) . . . . ?
Si8 C36 Si16 C46 -100.19(12) . . . . ?
C35 C36 Si16 C47 27.03(15) . . . . ?
Si15 C36 Si16 C47 -85.45(11) . . . . ?
Si8 C36 Si16 C47 139.90(11) . . . . ?
C54 C49 C50 C51 -0.5(4) . . . . ?
C55 C49 C50 C51 179.6(3) . . . . ?
C49 C50 C51 C52 -0.5(4) . . . . ?
C50 C51 C52 C53 1.1(5) . . . . ?
C51 C52 C53 C54 -0.6(5) . . . . ?
C52 C53 C54 C49 -0.4(4) . . . . ?
C50 C49 C54 C53 0.9(4) . . . . ?
C55 C49 C54 C53 -179.1(3) . . . . ?
C61 C56 C57 C58 0.0(4) . . . . ?
C69 C56 C57 C58 -178.8(3) . . . . ?
C56 C57 C58 C59 0.5(4) . . . . ?
C57 C58 C59 C60 -0.3(5) . . . . ?
C58 C59 C60 C61 -0.5(5) . . . . ?
C59 C60 C61 C56 1.0(4) . . . . ?
C57 C56 C61 C60 -0.7(4) . . . . ?
C69 C56 C61 C60 178.1(2) . . . . ?
C67 C62 C63 C64 4.6(18) . . . . ?
C68 C62 C63 C64 -175.2(11) . . . . ?
C62 C63 C64 C65 -1(2) . . . . ?
C63 C64 C65 C66 -1(2) . . . . ?
C64 C65 C66 C67 -0.2(17) . . . . ?
C63 C62 C67 C66 -6.3(16) . . . . ?
C68 C62 C67 C66 173.4(10) . . . . ?
C65 C66 C67 C62 3.6(12) . . . . ?
 
_refine_diff_density_max    0.949
_refine_diff_density_min   -0.477
_refine_diff_density_rms    0.058

_shelxl_version_number 2014-3

_shelx_res_file
;
TITL
REM  Yadorkari-X generated
CELL 0.71073 11.5327 17.8830 21.5599 69.4160 85.4580 76.3790
ZERR 2.0 0.0018 0.0027 0.0033 0.0020 0.0020 0.0020
LATT 1

REM  SPGR P-1 triclinic
SFAC C H Si
UNIT 131 272 32
SIZE 0.20 0.20 0.10
TEMP -173.0
L.S. 1
FMAP 2
PLAN -50
ACTA
CONF 2.5
MERG 2
OMIT -10.000000 53.000000
OMIT  -1  18  13
OMIT  -2   6  10
OMIT  -3   2  11
OMIT  -4  -1   2
OMIT  -2 -17   8
OMIT  -2   0   3
OMIT  -5   2  14
OMIT  -8  -1   7

dfix 1.506 0.005 C62 C68
dfix 2.509 0.005 C63 C68 C67 C68
dfix 1.390 0.005 C62 C63 C63 C64 C64 C65 C65 C66 C66 C67 C67 C62
simu C62 > C68
isor 0.005 0.01 C62 > C68

WGHT    0.038200    3.355700
FVAR       0.42796
SI1   3    0.795738    1.151526    0.147701    11.00000    0.01156    0.01204 =
         0.01155   -0.00411    0.00003   -0.00312
SI2   3    0.698406    1.122484    0.251643    11.00000    0.01353    0.01281 =
         0.01273   -0.00591    0.00124   -0.00335
SI3   3    0.689424    1.044830    0.187320    11.00000    0.01555    0.01329 =
         0.01236   -0.00529    0.00106   -0.00483
SI4   3    0.773112    0.981918    0.304862    11.00000    0.01231    0.01294 =
         0.01328   -0.00490    0.00052   -0.00343
SI5   3    0.874210    0.862488    0.279591    11.00000    0.01121    0.01364 =
         0.01142   -0.00434    0.00007   -0.00265
SI6   3    0.689595    0.902710    0.224244    11.00000    0.01213    0.01299 =
         0.01123   -0.00490   -0.00076   -0.00354
SI7   3    0.633743    0.892588    0.333325    11.00000    0.01021    0.01426 =
         0.01116   -0.00472    0.00008   -0.00318
SI8   3    0.807250    0.785768    0.388951    11.00000    0.01176    0.01255 =
         0.01110   -0.00336   -0.00074   -0.00372
C1    1    0.948440    1.185097    0.133714    11.00000    0.01223    0.01503 =
         0.01475   -0.00547    0.00064   -0.00470
C2    1    0.899337    1.276827    0.088639    11.00000    0.01465    0.01406 =
         0.01945   -0.00419   -0.00031   -0.00554
AFIX  23
H1    2    0.854705    1.308200    0.116118    11.00000   -1.20000
H2    2    0.966810    1.302117    0.067731    11.00000   -1.20000
AFIX   0
C3    1    0.817084    1.280164    0.034921    11.00000    0.01582    0.01383 =
         0.01484   -0.00337    0.00119   -0.00384
AFIX  23
H3    2    0.863696    1.254259    0.004326    11.00000   -1.20000
H4    2    0.781254    1.337932    0.008974    11.00000   -1.20000
AFIX   0
C4    1    0.715364    1.233615    0.068243    11.00000    0.01423    0.01143 =
         0.01270   -0.00246   -0.00069   -0.00386
SI9   3    1.077614    1.140331    0.086151    11.00000    0.01235    0.01940 =
         0.01441   -0.00505    0.00094   -0.00414
C5    1    1.156518    1.222544    0.035113    11.00000    0.02072    0.02935 =
         0.01986   -0.00688    0.00526   -0.01010
AFIX 137
H5    2    1.230885    1.197575    0.017800    11.00000   -1.50000
H6    2    1.174677    1.251621    0.062815    11.00000   -1.50000
H7    2    1.105124    1.261292   -0.001880    11.00000   -1.50000
AFIX   0
C6    1    1.037020    1.098388    0.024694    11.00000    0.01848    0.02387 =
         0.01770   -0.00793    0.00108   -0.00383
AFIX 137
H8    2    0.989865    1.142965   -0.011270    11.00000   -1.50000
H9    2    0.990038    1.057281    0.046660    11.00000   -1.50000
H10   2    1.109891    1.072945    0.006498    11.00000   -1.50000
AFIX   0
C7    1    1.197007    1.056827    0.140139    11.00000    0.01626    0.02655 =
         0.02525   -0.00720   -0.00273   -0.00191
AFIX 137
H11   2    1.159818    1.017293    0.174680    11.00000   -1.50000
H12   2    1.244164    1.080807    0.160792    11.00000   -1.50000
H13   2    1.249194    1.028912    0.113048    11.00000   -1.50000
AFIX   0
SI10  3    1.011557    1.187286    0.212306    11.00000    0.01522    0.02173 =
         0.01488   -0.00686   -0.00021   -0.00795
C8    1    0.909003    1.263455    0.244380    11.00000    0.02527    0.03538 =
         0.02930   -0.01945   -0.00097   -0.00806
AFIX 137
H14   2    0.827726    1.254720    0.247065    11.00000   -1.50000
H15   2    0.910049    1.319064    0.214316    11.00000   -1.50000
H16   2    0.935564    1.256444    0.288546    11.00000   -1.50000
AFIX   0
C9    1    1.040236    1.085351    0.280405    11.00000    0.02435    0.02746 =
         0.01800   -0.00456   -0.00357   -0.00853
AFIX 137
H17   2    1.079041    1.089127    0.317689    11.00000   -1.50000
H18   2    1.092294    1.044395    0.264123    11.00000   -1.50000
H19   2    0.964396    1.069128    0.295079    11.00000   -1.50000
AFIX   0
C10   1    1.153229    1.225514    0.197328    11.00000    0.02385    0.03674 =
         0.02307   -0.01135    0.00018   -0.01657
AFIX 137
H20   2    1.140140    1.279179    0.161975    11.00000   -1.50000
H21   2    1.216405    1.186737    0.184141    11.00000   -1.50000
H22   2    1.177055    1.230570    0.238055    11.00000   -1.50000
AFIX   0
SI11  3    0.584071    1.315121    0.080330    11.00000    0.01557    0.01307 =
         0.01878   -0.00436   -0.00113   -0.00107
C11   1    0.631663    1.383516    0.117651    11.00000    0.02478    0.01611 =
         0.02498   -0.00899    0.00201   -0.00441
AFIX 137
H23   2    0.561391    1.422715    0.124789    11.00000   -1.50000
H24   2    0.686762    1.413308    0.087517    11.00000   -1.50000
H25   2    0.671684    1.350237    0.160133    11.00000   -1.50000
AFIX   0
C12   1    0.519536    1.389702   -0.002125    11.00000    0.02535    0.01678 =
         0.02545   -0.00393   -0.00468    0.00125
AFIX 137
H26   2    0.459679    1.434909    0.004941    11.00000   -1.50000
H27   2    0.482022    1.361498   -0.023797    11.00000   -1.50000
H28   2    0.583427    1.411394   -0.030298    11.00000   -1.50000
AFIX   0
C13   1    0.456389    1.274765    0.129351    11.00000    0.01683    0.02132 =
         0.02534   -0.00864    0.00150   -0.00269
AFIX 137
H29   2    0.487288    1.222166    0.164020    11.00000   -1.50000
H30   2    0.403318    1.267086    0.099858    11.00000   -1.50000
H31   2    0.411905    1.313975    0.149765    11.00000   -1.50000
AFIX   0
SI12  3    0.665180    1.188653    0.009138    11.00000    0.01506    0.01602 =
         0.01385   -0.00532   -0.00183   -0.00358
C14   1    0.679742    1.257432   -0.078828    11.00000    0.03040    0.02683 =
         0.01507   -0.00589   -0.00130   -0.00810
AFIX 137
H32   2    0.657805    1.233255   -0.109308    11.00000   -1.50000
H33   2    0.762394    1.263526   -0.087022    11.00000   -1.50000
H34   2    0.626608    1.311316   -0.085944    11.00000   -1.50000
AFIX   0
C15   1    0.506388    1.177493    0.021591    11.00000    0.01779    0.02449 =
         0.02563   -0.01097   -0.00354   -0.00553
AFIX 137
H35   2    0.489661    1.147645   -0.005839    11.00000   -1.50000
H36   2    0.452708    1.231892    0.008782    11.00000   -1.50000
H37   2    0.493878    1.147115    0.068331    11.00000   -1.50000
AFIX   0
C16   1    0.753688    1.086338    0.008514    11.00000    0.01973    0.02132 =
         0.01984   -0.00954   -0.00078   -0.00467
AFIX 137
H38   2    0.773025    1.049559    0.054131    11.00000   -1.50000
H39   2    0.827635    1.093261   -0.016337    11.00000   -1.50000
H40   2    0.706602    1.062792   -0.012577    11.00000   -1.50000
AFIX   0
C17   1    0.605546    1.172125    0.312345    11.00000    0.01935    0.01691 =
         0.01584   -0.00932    0.00321   -0.00266
C18   1    0.573969    1.265921    0.283822    11.00000    0.03002    0.01866 =
         0.02707   -0.01153    0.00566   -0.00404
AFIX 137
H41   2    0.529717    1.283925    0.242227    11.00000   -1.50000
H42   2    0.647387    1.286481    0.275399    11.00000   -1.50000
H43   2    0.524604    1.287359    0.315594    11.00000   -1.50000
AFIX   0
C19   1    0.489485    1.142792    0.328853    11.00000    0.03922    0.03590 =
         0.04428   -0.02459    0.02584   -0.01959
AFIX 137
H44   2    0.445709    1.164199    0.362116    11.00000   -1.50000
H45   2    0.507300    1.082770    0.346413    11.00000   -1.50000
H46   2    0.440730    1.162525    0.288657    11.00000   -1.50000
AFIX   0
C20   1    0.677212    1.145438    0.375870    11.00000    0.04784    0.04327 =
         0.02549   -0.02191   -0.00896    0.01304
AFIX 137
H47   2    0.632789    1.171940    0.406057    11.00000   -1.50000
H48   2    0.754072    1.161393    0.365319    11.00000   -1.50000
H49   2    0.690881    1.085812    0.397100    11.00000   -1.50000
AFIX   0
C21   1    1.015883    0.853355    0.225908    11.00000    0.01201    0.01766 =
         0.01622   -0.00515    0.00156   -0.00248
C22   1    0.995350    0.929530    0.163210    11.00000    0.01647    0.02212 =
         0.01596   -0.00459    0.00333   -0.00239
AFIX 137
H50   2    0.983213    0.978703    0.175391    11.00000   -1.50000
H51   2    0.924586    0.931606    0.139781    11.00000   -1.50000
H52   2    1.065104    0.927053    0.134317    11.00000   -1.50000
AFIX   0
C23   1    1.029952    0.778988    0.203851    11.00000    0.02370    0.02241 =
         0.02511   -0.01118    0.00608   -0.00316
AFIX 137
H53   2    0.956983    0.783258    0.181231    11.00000   -1.50000
H54   2    1.044201    0.728708    0.242732    11.00000   -1.50000
H55   2    1.097664    0.777476    0.173496    11.00000   -1.50000
AFIX   0
C24   1    1.131547    0.847439    0.259442    11.00000    0.01283    0.02885 =
         0.01931   -0.00584    0.00021   -0.00284
AFIX 137
H56   2    1.198723    0.842133    0.229304    11.00000   -1.50000
H57   2    1.144453    0.799397    0.300134    11.00000   -1.50000
H58   2    1.125476    0.897001    0.270345    11.00000   -1.50000
AFIX   0
C25   1    0.622054    0.873993    0.157230    11.00000    0.01851    0.01657 =
         0.01476   -0.00728   -0.00253   -0.00475
C26   1    0.722688    0.838322    0.117891    11.00000    0.02372    0.02994 =
         0.01827   -0.01434   -0.00178   -0.00281
AFIX 137
H59   2    0.688438    0.829302    0.081641    11.00000   -1.50000
H60   2    0.768889    0.786095    0.147262    11.00000   -1.50000
H61   2    0.775083    0.876762    0.099615    11.00000   -1.50000
AFIX   0
C27   1    0.545893    0.952264    0.108967    11.00000    0.02428    0.02082 =
         0.01705   -0.00759   -0.00673   -0.00465
AFIX 137
H62   2    0.509987    0.938599    0.075788    11.00000   -1.50000
H63   2    0.596351    0.991022    0.086802    11.00000   -1.50000
H64   2    0.482706    0.977156    0.133490    11.00000   -1.50000
AFIX   0
C28   1    0.541811    0.812725    0.186699    11.00000    0.02819    0.02251 =
         0.02134   -0.00853   -0.00401   -0.01163
AFIX 137
H65   2    0.469455    0.839028    0.204699    11.00000   -1.50000
H66   2    0.584848    0.765109    0.222214    11.00000   -1.50000
H67   2    0.519892    0.794915    0.152000    11.00000   -1.50000
AFIX   0
C29   1    0.459804    0.916817    0.343228    11.00000    0.01098    0.01889 =
         0.01629   -0.00784   -0.00011   -0.00377
C30   1    0.404069    0.940442    0.402758    11.00000    0.01213    0.02432 =
         0.01975   -0.01072    0.00335   -0.00491
AFIX 137
H68   2    0.317100    0.956822    0.397635    11.00000   -1.50000
H69   2    0.434480    0.986211    0.404964    11.00000   -1.50000
H70   2    0.425084    0.893359    0.443638    11.00000   -1.50000
AFIX   0
C31   1    0.411443    0.987393    0.278987    11.00000    0.01392    0.02760 =
         0.01814   -0.00819   -0.00289    0.00006
AFIX 137
H71   2    0.428712    0.968022    0.241281    11.00000   -1.50000
H72   2    0.449920    1.033011    0.272236    11.00000   -1.50000
H73   2    0.325000    1.005941    0.282668    11.00000   -1.50000
AFIX   0
C32   1    0.413965    0.842234    0.344407    11.00000    0.01541    0.02850 =
         0.02837   -0.01543    0.00144   -0.00874
AFIX 137
H74   2    0.432473    0.798545    0.387458    11.00000   -1.50000
H75   2    0.452792    0.822538    0.309206    11.00000   -1.50000
H76   2    0.327420    0.858093    0.337308    11.00000   -1.50000
AFIX   0
C33   1    0.807748    0.668989    0.421672    11.00000    0.01784    0.01395 =
         0.01366   -0.00324   -0.00265   -0.00479
C34   1    0.896164    0.637006    0.481957    11.00000    0.01882    0.01519 =
         0.01702   -0.00063   -0.00533   -0.00497
AFIX  23
H77   2    0.884141    0.583304    0.512603    11.00000   -1.20000
H78   2    0.979430    0.629408    0.465850    11.00000   -1.20000
AFIX   0
C35   1    0.875013    0.697995    0.518630    11.00000    0.01854    0.01722 =
         0.01371    0.00020   -0.00322   -0.00659
AFIX  23
H79   2    0.936319    0.680143    0.553633    11.00000   -1.20000
H80   2    0.795785    0.699720    0.540113    11.00000   -1.20000
AFIX   0
C36   1    0.880958    0.786353    0.468786    11.00000    0.01403    0.01488 =
         0.01125   -0.00198   -0.00117   -0.00592
SI13  3    0.872489    0.610669    0.363362    11.00000    0.02008    0.01362 =
         0.01764   -0.00479   -0.00259   -0.00304
C37   1    1.037880    0.599211    0.355114    11.00000    0.02391    0.02649 =
         0.02604   -0.01070   -0.00089   -0.00254
AFIX 137
H81   2    1.066665    0.575973    0.320320    11.00000   -1.50000
H82   2    1.076406    0.562648    0.397275    11.00000   -1.50000
H83   2    1.057212    0.653007    0.343426    11.00000   -1.50000
AFIX   0
C38   1    0.803172    0.659858    0.279023    11.00000    0.03065    0.01881 =
         0.01923   -0.00601   -0.00501   -0.00394
AFIX 137
H84   2    0.785027    0.719557    0.267198    11.00000   -1.50000
H85   2    0.729352    0.641710    0.279003    11.00000   -1.50000
H86   2    0.858794    0.644097    0.246648    11.00000   -1.50000
AFIX   0
C39   1    0.857702    0.501029    0.394822    11.00000    0.03064    0.01524 =
         0.02722   -0.00665   -0.00429   -0.00344
AFIX 137
H87   2    0.897916    0.473534    0.364337    11.00000   -1.50000
H88   2    0.773043    0.499410    0.397685    11.00000   -1.50000
H89   2    0.894441    0.473017    0.438836    11.00000   -1.50000
AFIX   0
SI14  3    0.658648    0.642338    0.455124    11.00000    0.01747    0.01661 =
         0.02213   -0.00475   -0.00012   -0.00707
C40   1    0.565139    0.640867    0.388667    11.00000    0.02127    0.02699 =
         0.03939   -0.01761   -0.00407   -0.00649
AFIX 137
H90   2    0.483636    0.639362    0.404942    11.00000   -1.50000
H91   2    0.599052    0.592225    0.376586    11.00000   -1.50000
H92   2    0.563754    0.690243    0.349665    11.00000   -1.50000
AFIX   0
C41   1    0.680688    0.538093    0.521715    11.00000    0.03057    0.02328 =
         0.03506   -0.00155    0.00493   -0.01168
AFIX 137
H93   2    0.604086    0.521684    0.531659    11.00000   -1.50000
H94   2    0.712134    0.540262    0.561816    11.00000   -1.50000
H95   2    0.737303    0.498141    0.506287    11.00000   -1.50000
AFIX   0
C42   1    0.565880    0.710496    0.498396    11.00000    0.02017    0.02817 =
         0.02660   -0.01117    0.00202   -0.00791
AFIX 137
H96   2    0.561397    0.767959    0.471013    11.00000   -1.50000
H97   2    0.602513    0.699037    0.541207    11.00000   -1.50000
H98   2    0.485328    0.700055    0.505544    11.00000   -1.50000
AFIX   0
SI15  3    1.046238    0.791270    0.463400    11.00000    0.01265    0.01821 =
         0.01540   -0.00433   -0.00183   -0.00488
C43   1    1.074018    0.891101    0.404951    11.00000    0.01552    0.02176 =
         0.02261   -0.00733    0.00200   -0.00839
AFIX 137
H99   2    1.153248    0.881903    0.385185    11.00000   -1.50000
H100  2    1.070072    0.928865    0.429167    11.00000   -1.50000
H101  2    1.013283    0.914819    0.369890    11.00000   -1.50000
AFIX   0
C44   1    1.106244    0.776537    0.546996    11.00000    0.02084    0.03693 =
         0.02167   -0.00551   -0.00698   -0.00845
AFIX 137
H102  2    1.191683    0.775917    0.543371    11.00000   -1.50000
H103  2    1.094075    0.724430    0.579141    11.00000   -1.50000
H104  2    1.064078    0.821626    0.561807    11.00000   -1.50000
AFIX   0
C45   1    1.153150    0.707313    0.442111    11.00000    0.01593    0.02083 =
         0.03189   -0.00781    0.00050   -0.00348
AFIX 137
H105  2    1.126412    0.703503    0.401514    11.00000   -1.50000
H106  2    1.156204    0.655177    0.478489    11.00000   -1.50000
H107  2    1.232773    0.719333    0.435190    11.00000   -1.50000
AFIX   0
SI16  3    0.803773    0.862600    0.511581    11.00000    0.01518    0.01915 =
         0.01231   -0.00656    0.00017   -0.00598
C46   1    0.864159    0.956822    0.492640    11.00000    0.02226    0.02460 =
         0.02509   -0.01319    0.00113   -0.00866
AFIX 137
H108  2    0.867386    0.983744    0.444526    11.00000   -1.50000
H109  2    0.944604    0.941465    0.511360    11.00000   -1.50000
H110  2    0.812053    0.994510    0.512133    11.00000   -1.50000
AFIX   0
C47   1    0.815837    0.810871    0.604162    11.00000    0.02582    0.03460 =
         0.01413   -0.00890    0.00097   -0.00804
AFIX 137
H111  2    0.784938    0.851506    0.625721    11.00000   -1.50000
H112  2    0.899648    0.785699    0.616642    11.00000   -1.50000
H113  2    0.769203    0.768481    0.618316    11.00000   -1.50000
AFIX   0
C48   1    0.641049    0.902586    0.494022    11.00000    0.01831    0.02589 =
         0.02061   -0.01345    0.00081   -0.00368
AFIX 137
H114  2    0.608238    0.940144    0.518172    11.00000   -1.50000
H115  2    0.600758    0.856800    0.508287    11.00000   -1.50000
H116  2    0.628501    0.931860    0.446364    11.00000   -1.50000
AFIX   0
C49   1    0.481763    0.561756    0.268112    11.00000    0.03923    0.04511 =
         0.04672   -0.02856   -0.01271   -0.00595
C50   1    0.551577    0.584880    0.212780    11.00000    0.04993    0.04240 =
         0.04936   -0.02334   -0.01050   -0.01087
AFIX  43
H117  2    0.524688    0.635515    0.178153    11.00000   -1.20000
AFIX   0
C51   1    0.660484    0.534882    0.207327    11.00000    0.05162    0.07941 =
         0.07838   -0.05609    0.01312   -0.03056
AFIX  43
H118  2    0.707798    0.551007    0.168877    11.00000   -1.20000
AFIX   0
C52   1    0.700548    0.461434    0.257810    11.00000    0.04158    0.05580 =
         0.11536   -0.06388   -0.01641    0.00159
AFIX  43
H119  2    0.775946    0.427455    0.254472    11.00000   -1.20000
AFIX   0
C53   1    0.631611    0.438050    0.312228    11.00000    0.06831    0.03431 =
         0.07884   -0.02714   -0.02989   -0.00556
AFIX  43
H120  2    0.658787    0.387350    0.346732    11.00000   -1.20000
AFIX   0
C54   1    0.522716    0.487260    0.317735    11.00000    0.06205    0.05296 =
         0.04702   -0.02456   -0.00810   -0.02001
AFIX  43
H121  2    0.475155    0.470031    0.355892    11.00000   -1.20000
AFIX   0
C55   1    0.363885    0.616470    0.274067    11.00000    0.04666    0.08630 =
         0.06995   -0.04837   -0.01230    0.00415
AFIX  33
H122  2    0.326438    0.590737    0.316182    11.00000   -1.50000
H123  2    0.376539    0.669361    0.272616    11.00000   -1.50000
H124  2    0.311770    0.625009    0.237289    11.00000   -1.50000
AFIX   0
C56   1    0.100290    0.542740    0.176854    11.00000    0.04456    0.02436 =
         0.02731   -0.01394    0.00576   -0.01199
C57   1    0.223822    0.526011    0.173307    11.00000    0.04833    0.03253 =
         0.04016   -0.01236    0.00910   -0.02099
AFIX  43
H125  2    0.261629    0.563472    0.140092    11.00000   -1.20000
AFIX   0
C58   1    0.293194    0.456121    0.216964    11.00000    0.03899    0.03982 =
         0.06039   -0.01890    0.00354   -0.01249
AFIX  43
H126  2    0.377702    0.446164    0.213797    11.00000   -1.20000
AFIX   0
C59   1    0.239526    0.400726    0.265233    11.00000    0.04637    0.03229 =
         0.04792   -0.00893   -0.00276   -0.00567
AFIX  43
H127  2    0.286909    0.352494    0.295226    11.00000   -1.20000
AFIX   0
C60   1    0.116946    0.415820    0.269625    11.00000    0.05131    0.02854 =
         0.03967   -0.00365    0.01019   -0.01234
AFIX  43
H128  2    0.079706    0.377682    0.302536    11.00000   -1.20000
AFIX   0
C61   1    0.047509    0.486689    0.226052    11.00000    0.03809    0.03044 =
         0.03538   -0.01103    0.00965   -0.00972
AFIX  43
H129  2   -0.036925    0.496969    0.229906    11.00000   -1.20000
PART -1
AFIX   0
C62   1    0.068417    0.481985    0.008960    10.50000    0.03735    0.02524 =
         0.05548   -0.01219   -0.00074   -0.01367
C63   1    0.050460    0.517967   -0.060360    10.50000    0.12609    0.07627 =
         0.09682   -0.02953   -0.02387   -0.02679
AFIX  43
H133  2    0.110012    0.518209   -0.093457    10.50000   -1.20000
AFIX   0
C64   1   -0.068590    0.552318   -0.070817    10.50000    0.10584    0.04685 =
         0.08434   -0.03814   -0.00209   -0.03189
AFIX  43
H134  2   -0.089289    0.579116   -0.116342    10.50000   -1.20000
AFIX   0
C65   1   -0.164728    0.556118   -0.029014    10.50000    0.08018    0.05505 =
         0.11719   -0.03740   -0.03160   -0.01640
AFIX  43
H135  2   -0.242692    0.584132   -0.045820    10.50000   -1.20000
AFIX   0
C66   1   -0.143947    0.517950    0.037898    10.50000    0.07401    0.06969 =
         0.10172   -0.05455    0.03775   -0.04844
AFIX  43
H136  2   -0.205351    0.517904    0.069991    10.50000   -1.20000
AFIX   0
C67   1   -0.022320    0.478418    0.055040    10.50000    0.05466    0.02076 =
         0.03240   -0.01263    0.01587   -0.02406
AFIX  43
H137  2   -0.002787    0.448185    0.100323    10.50000   -1.20000
AFIX   0
C68   1    0.196368    0.446193    0.031929    10.50000    0.10441    0.04733 =
         0.20777   -0.05275   -0.02468   -0.01997
AFIX 137
H138  2    0.232496    0.489693    0.033976    10.50000   -1.50000
H139  2    0.240952    0.421457    0.000713    10.50000   -1.50000
H140  2    0.198693    0.404201    0.076004    10.50000   -1.50000
PART 0
AFIX   0
C69   1    0.025257    0.618290    0.128225    11.00000    0.05537    0.02883 =
         0.03301   -0.01067    0.00544   -0.01151
AFIX  33
H130  2   -0.059370    0.619667    0.138486    11.00000   -1.50000
H131  2    0.045198    0.667170    0.131370    11.00000   -1.50000
H132  2    0.041144    0.617169    0.083193    11.00000   -1.50000

AFIX   0
HKLF 4 1 1 0 0 0 1 0 0 0 1

REM
REM R1 =  0.0357 for   13586 Fo > 4sig(Fo)  and  0.0461 for all   16153 data
REM    803 parameters refined using     93 restraints

END

WGHT      0.0383      3.3470

REM Highest difference peak  0.949,  deepest hole -0.477,  1-sigma level  0.058
Q1    1   0.1780  0.4600 -0.0154  11.00000  0.05    0.95
Q2    1   0.0166  0.4596  0.0616  11.00000  0.05    0.61
Q3    1   0.1260  0.4436  0.0497  11.00000  0.05    0.53
Q4    1   0.8409  0.8225  0.4893  11.00000  0.05    0.44
Q5    1   1.1147  0.7532  0.4502  11.00000  0.05    0.42
Q6    1   0.9820  1.1869  0.1718  11.00000  0.05    0.40
Q7    1   0.6636  1.2697  0.0723  11.00000  0.05    0.40
Q8    1   1.0165  1.0407  0.2711  11.00000  0.05    0.38
Q9    1   0.6020  0.6816  0.4712  11.00000  0.05    0.37
Q10   1   0.8202  0.8229  0.3465  11.00000  0.05    0.37
Q11   1   0.9761  1.2287  0.2262  11.00000  0.05    0.37
Q12   1   0.7158  0.8752  0.5002  11.00000  0.05    0.36
Q13   1   0.9621  0.5966  0.3593  11.00000  0.05    0.36
Q14   1   1.1173  1.1842  0.0592  11.00000  0.05    0.36
Q15   1   1.0210  0.8157  0.2194  11.00000  0.05    0.36
Q16   1   0.6613  0.8897  0.1862  11.00000  0.05    0.35
Q17   1   0.8290  0.6349  0.3203  11.00000  0.05    0.35
Q18   1   0.5819  1.3586  0.1031  11.00000  0.05    0.34
Q19   1   0.6793  1.2185  0.0403  11.00000  0.05    0.34
Q20   1   1.0350  1.1105  0.2389  11.00000  0.05    0.34
Q21   1   1.0572  1.1242  0.0508  11.00000  0.05    0.33
Q22   1   1.0025  0.8963  0.1995  11.00000  0.05    0.33
Q23   1   0.6725  1.2228 -0.0368  11.00000  0.05    0.32
Q24   1   1.0780  0.8445  0.2405  11.00000  0.05    0.32
Q25   1   0.5234  1.2808  0.1087  11.00000  0.05    0.32
Q26   1   1.0663  0.7919  0.5103  11.00000  0.05    0.31
Q27   1   0.8369  0.7063  0.3983  11.00000  0.05    0.31
Q28   1   0.8083  0.8362  0.5604  11.00000  0.05    0.31
Q29   1   0.9982  1.1639  0.1102  11.00000  0.05    0.31
Q30   1   0.8703  1.2705  0.0568  11.00000  0.05    0.30
Q31   1   0.8801  0.6675  0.5026  11.00000  0.05    0.30
Q32   1   0.6825  0.9018  0.2711  11.00000  0.05    0.30
Q33   1   0.8422  0.7893  0.4327  11.00000  0.05    0.30
Q34   1   0.6753  1.1689  0.2577  11.00000  0.05    0.30
Q35   1   0.9613  0.8551  0.2527  11.00000  0.05    0.30
Q36   1   0.4478  0.9515  0.3128  11.00000  0.05    0.30
Q37   1   0.7815  0.8714  0.2455  11.00000  0.05    0.29
Q38   1   0.4323  0.9282  0.3718  11.00000  0.05    0.29
Q39   1   0.5374  0.9048  0.3438  11.00000  0.05    0.29
Q40   1   0.6979  1.1360  0.0045  11.00000  0.05    0.29
Q41   1   0.5769  1.1892  0.0150  11.00000  0.05    0.29
Q42   1   1.0709  0.8351  0.4314  11.00000  0.05    0.29
Q43   1   0.6715  0.8550  0.1443  11.00000  0.05    0.29
Q44   1   0.6733  0.9955  0.1880  11.00000  0.05    0.29
Q45   1   0.9554  0.7875  0.4546  11.00000  0.05    0.29
Q46   1   1.0611  0.8513  0.4363  11.00000  0.05    0.29
Q47   1   0.6026  0.6433  0.4208  11.00000  0.05    0.28
Q48   1   1.1161  1.0688  0.2855  11.00000  0.05    0.28
Q49   1   0.7121  0.9644  0.2130  11.00000  0.05    0.28
Q50   1   0.5934  0.9130  0.1332  11.00000  0.05    0.27
;
_shelx_res_checksum   14992

_shelx_hkl_file
;
  -1   0   0 1009.66   22.69
  -2   0   0  102.09    3.74
  -3   0   0    2.61    1.72
  -4   0   0  595.34   15.35
  -5   0   0    6.91    2.08
  -6   0   0  748.67   19.98
  -7   0   0   25.76    3.70
  -8   0   0  512.81   16.25
  -9   0   0  562.97   18.18
 -10   0   0  319.41   13.40
 -10   0   0  324.86    9.82
 -11   0   0  209.79   11.37
 -11   0   0  235.03    8.32
 -12   0   0  249.17    9.34
 -12   0   0  263.88   13.21
 -13   0   0   60.04    7.94
 -14   0   0    6.00    5.98
 -14   1   0    6.05    6.25
 -13   1   0   12.83    3.87
 -13   1   0   15.77    5.79
 -12   1   0   23.70    5.97
 -12   1   0   24.27    4.11
 -11   1   0   -1.28    2.70
 -11   1   0    0.10    4.11
 -10   1   0   81.25    5.12
 -10   1   0   81.33    7.37
  -9   1   0  177.29    9.25
  -9   1   0  171.18    6.65
  -8   1   0  711.30   16.32
  -8   1   0  689.97   20.16
  -7   1   0   51.88    4.88
  -6   1   0    1.87    2.27
  -5   1   0   26.74    3.06
  -4   1   0  544.90   14.23
  -3   1   0   62.20    3.43
  -2   1   0  439.05   10.76
  -1   1   0  223.55    5.51
  -1  -1   0  314.59    7.65
   1   1   0  319.23    6.14
  -2  -1   0 3567.42   78.08
  -3  -1   0  764.13   18.51
  -4  -1   0 3394.46   75.42
  -5  -1   0 1359.09   32.48
  -6  -1   0  181.16    7.48
  -7  -1   0    3.79    2.82
  -8  -1   0    0.50    2.60
  -9  -1   0   47.37    5.50
 -10  -1   0  549.69   18.71
 -11  -1   0  116.39    5.88
 -11  -1   0  102.45    8.52
 -12  -1   0  498.02   13.88
 -12  -1   0  480.98   18.80
 -13  -1   0  411.77   17.79
 -14  -1   0   -0.25    5.61
 -14   2   0   65.83    8.75
 -13   2   0  265.72   10.27
 -13   2   0  276.11   14.22
 -12   2   0   -1.77    4.54
 -12   2   0   -0.87    2.99
 -11   2   0    6.74    4.45
 -11   2   0    5.82    3.05
 -10   2   0  384.63   11.50
 -10   2   0  393.44   14.95
  -9   2   0   98.14    5.30
  -9   2   0   98.37    7.14
  -8   2   0  167.79    8.26
  -8   2   0  161.29    6.25
  -7   2   0   85.77    4.17
  -7   2   0   84.92    5.96
  -6   2   0  282.29    7.74
  -6   2   0  277.83    9.65
  -5   2   0  298.88    9.67
  -4   2   0   51.39    3.51
  -3   2   0 1944.32   43.56
  -2   2   0  148.94    4.27
  -2   2   0  155.44    4.86
  -1   2   0  852.02   17.06
   0   2   0  583.04   11.82
   1   2   0  266.52    5.44
   1   2   0  267.45    5.68
  -1  -2   0  278.86    6.79
  -2  -2   0  663.72   15.87
   2   2   0  672.25   12.73
  -3  -2   0  213.74    7.01
  -5  -2   0  264.02    9.06
  -6  -2   0  892.11   23.21
  -7  -2   0    6.88    2.91
  -8  -2   0   77.27    6.21
  -9  -2   0   25.17    4.72
 -10  -2   0  273.45   12.39
 -11  -2   0  332.23    9.87
 -11  -2   0  331.53   14.39
 -12  -2   0  133.04   10.03
 -13  -2   0  435.98   18.14
 -14  -2   0   46.84    7.48
 -14   3   0   46.84    5.73
 -13   3   0   15.18    6.22
 -13   3   0   13.01    4.03
 -12   3   0  201.29    8.67
 -12   3   0  212.67   11.87
 -11   3   0   95.13    8.21
 -11   3   0  107.08    6.25
 -10   3   0    1.77    2.63
 -10   3   0    7.09    4.07
  -9   3   0  296.78    9.55
  -9   3   0  297.08   12.00
  -8   3   0   -4.50    2.67
  -8   3   0   -0.52    2.04
  -7   3   0   29.91    3.74
  -7   3   0   30.69    2.94
  -6   3   0  272.28    7.74
  -6   3   0  263.60    9.29
  -5   3   0   -0.43    1.39
  -5   3   0   -0.35    2.05
  -4   3   0   94.83    3.71
  -4   3   0   91.23    4.32
  -3   3   0  144.04    4.92
  -3   3   0  140.62    4.31
  -2   3   0  178.99    5.21
  -2   3   0  181.57    4.85
  -1   3   0    6.35    1.25
  -1   3   0    8.11    1.01
   0   3   0 8268.89  161.43
  -1  -3   0 6719.90  156.84
   1   3   0 7449.59  139.99
   1   3   0 7298.44  130.57
   2   3   0  590.72   12.11
  -2  -3   0  591.85   14.62
   2   3   0  591.51   11.63
  -3  -3   0 2032.03   46.18
   3   3   0 2066.53   37.47
  -4  -3   0 2266.20   51.47
  -5  -3   0  704.33   18.67
  -6  -3   0  966.82   24.93
  -7  -3   0  447.41   14.38
  -8  -3   0  178.12    8.65
  -9  -3   0    3.12    3.35
 -10  -3   0  442.95   16.18
 -11  -3   0   10.24    4.86
 -12  -3   0   57.13    6.90
 -13  -3   0   58.59    8.01
 -14  -3   0   11.49    6.39
 -14   4   0  108.76    7.67
 -13   4   0   23.21    4.49
 -12   4   0   78.16    6.00
 -11   4   0   17.40    3.83
 -11   4   0   28.09    5.74
 -10   4   0    4.84    2.88
 -10   4   0    4.80    4.17
  -9   4   0  112.59    5.88
  -9   4   0  108.11    7.34
  -8   4   0  449.35   14.85
  -8   4   0  472.51   12.57
  -7   4   0  428.35   11.44
  -7   4   0  425.83   13.46
  -6   4   0   87.72    5.35
  -6   4   0   85.02    4.26
  -5   4   0   68.03    4.49
  -5   4   0   79.28    3.82
  -4   4   0 1482.81   30.05
  -4   4   0 1439.46   33.68
  -3   4   0  356.19    9.46
  -3   4   0  355.35    8.63
  -2   4   0  295.40    7.74
  -2   4   0  316.95    7.43
  -1   4   0  178.04    4.56
  -1   4   0  169.69    4.69
   0  -4   0 2070.79   47.90
   0   4   0 2196.55   41.80
   1   4   0  273.30    6.28
  -1  -4   0  274.54    7.57
   2   4   0  211.95    4.91
  -2  -4   0  212.59    6.59
   2   4   0  207.52    4.98
  -3  -4   0 1576.33   35.55
   3   4   0 1521.77   30.28
   3   4   0 1530.54   28.66
   4   4   0   62.59    2.73
  -4  -4   0   58.39    4.05
  -5  -4   0    9.94    2.68
  -6  -4   0 1679.84   40.47
  -7  -4   0   30.49    4.06
  -8  -4   0   37.90    4.80
  -9  -4   0  418.39   15.06
 -10  -4   0  177.38   10.04
 -11  -4   0   51.94    6.30
 -12  -4   0  139.72   10.28
 -13  -4   0  206.34   12.88
 -14  -4   0    8.00    6.27
 -13   5   0  155.62    8.49
 -12   5   0   24.45    4.53
 -11   5   0   23.89    4.12
 -10   5   0   -0.07    3.63
 -10   5   0    1.38    2.78
  -9   5   0   79.21    5.29
  -9   5   0   77.49    6.46
  -8   5   0  290.49    9.31
  -8   5   0  272.53   10.79
  -7   5   0    1.00    2.06
  -7   5   0    0.89    2.73
  -6   5   0  342.37    9.49
  -6   5   0  317.42   10.64
  -5   5   0  153.25    6.27
  -5   5   0  150.54    5.54
  -4   5   0   42.23    3.05
  -4   5   0   42.89    3.27
  -3   5   0  498.64   12.69
  -3   5   0  518.92   11.85
  -2   5   0    0.73    1.08
  -2   5   0   -0.10    0.96
  -1   5   0   13.52    1.31
  -1   5   0    9.23    1.38
   0  -5   0    1.31    0.94
   0   5   0    5.76    1.12
  -1  -5   0  799.92   18.70
   1   5   0  796.98   16.34
   1   5   0  801.57   15.53
  -2  -5   0  291.18    8.30
   2   5   0  299.34    6.68
   3   5   0   19.63    1.59
   3   5   0   16.55    1.48
  -3  -5   0   20.47    2.28
   4   5   0 1634.23   31.31
  -4  -5   0 1705.28   39.04
  -5  -5   0  155.91    7.00
   5   5   0  155.53    4.89
  -6  -5   0    3.77    2.38
  -7  -5   0  188.13    8.70
  -8  -5   0    0.61    3.20
  -9  -5   0   61.64    6.13
 -10  -5   0  184.93   10.39
 -11  -5   0   31.27    5.97
 -12  -5   0   62.73    7.69
 -13  -5   0   39.29    6.85
 -14  -5   0   40.43    8.08
 -13   6   0    3.49    4.02
 -12   6   0  191.06    9.11
 -11   6   0   40.56    4.91
 -10   6   0  215.06    8.80
  -9   6   0   -0.23    2.69
  -8   6   0   43.21    4.81
  -8   6   0   42.50    4.01
  -7   6   0  201.79    7.40
  -7   6   0  193.73    8.44
  -6   6   0  152.72    6.76
  -6   6   0  153.19    6.13
  -5   6   0  431.87   11.19
  -5   6   0  424.52   12.13
  -4   6   0 1025.84   24.45
  -4   6   0 1037.19   22.37
  -3   6   0  810.94   19.07
  -3   6   0  805.42   17.77
  -2   6   0  773.65   16.88
  -2   6   0  782.69   17.90
  -1   6   0  139.58    3.85
  -1   6   0  141.25    4.51
   0   6   0  252.39    6.33
   0  -6   0  240.31    6.30
   1   6   0  146.28    4.34
   1   6   0  147.40    4.24
  -1  -6   0  153.37    5.07
   2   6   0 1928.27   37.23
   2   6   0 1879.94   35.04
  -2  -6   0 1863.05   42.64
   3   6   0    2.55    1.18
   3   6   0    1.68    0.91
  -3  -6   0    3.85    1.99
   4   6   0 3027.10   58.34
   4   6   0 3039.98   55.01
  -4  -6   0 2936.88   67.54
  -5  -6   0  664.39   18.25
   5   6   0  679.15   14.27
  -6  -6   0  222.83    8.99
  -7  -6   0    1.45    2.80
  -8  -6   0   -1.33    3.14
  -9  -6   0  193.59    9.80
 -10  -6   0    1.09    4.05
 -11  -6   0  105.11    8.78
 -12  -6   0   14.53    5.64
 -13  -6   0  232.29   13.76
 -14  -6   0   58.56    9.01
 -12   7   0   17.53    4.52
 -11   7   0   -1.33    3.34
 -10   7   0   21.62    4.14
  -9   7   0   30.75    4.17
  -8   7   0   14.84    3.23
  -7   7   0   30.22    3.63
  -6   7   0  419.25   12.70
  -6   7   0  420.95   11.68
  -5   7   0  290.08    9.20
  -5   7   0  291.23    8.71
  -4   7   0  122.57    5.05
  -4   7   0  125.43    5.11
  -3   7   0 2417.58   53.65
  -3   7   0 2428.33   48.74
  -2   7   0   53.47    3.16
  -2   7   0   52.69    2.49
  -1   7   0  815.89   18.32
  -1   7   0  800.65   17.48
   0  -7   0   -0.35    0.95
   0   7   0    1.19    1.19
  -1  -7   0   40.44    3.08
   1   7   0   34.26    2.26
   1   7   0   36.37    2.32
  -2  -7   0 1009.51   24.27
   2   7   0 1008.62   19.96
   2   7   0 1036.52   20.88
   3   7   0   54.94    2.45
   3   7   0   48.69    2.83
  -3  -7   0   58.61    4.13
   4   7   0   44.89    2.29
   4   7   0   36.31    2.65
  -4  -7   0   36.57    3.43
   5   7   0  477.75   10.96
  -5  -7   0  481.53   14.23
  -6  -7   0  561.98   16.52
   6   7   0  544.29   12.47
  -7  -7   0   70.13    5.82
  -8  -7   0   29.93    4.35
  -9  -7   0    7.56    4.24
 -10  -7   0  844.69   25.82
 -11  -7   0    7.35    4.43
 -12  -7   0  103.54    9.50
 -13  -7   0   16.28    6.16
 -14  -7   0   12.62    6.72
 -12   8   0  247.42   10.90
 -11   8   0   10.98    4.24
 -10   8   0   -2.43    3.14
  -9   8   0  214.55    8.85
  -8   8   0   42.46    4.39
  -7   8   0 1056.76   24.66
  -6   8   0  394.71   11.43
  -5   8   0  176.84    6.61
  -4   8   0  322.50    9.28
  -3   8   0    3.46    1.76
  -2   8   0   64.06    2.70
  -2   8   0   64.33    3.67
  -1   8   0  222.98    6.57
   0  -8   0  105.73    3.65
   0   8   0  108.29    4.19
  -1  -8   0 1482.44   33.66
   1   8   0 1462.45   29.91
   1   8   0 1483.07   28.36
   2   8   0 2263.21   44.90
  -2  -8   0 2280.79   51.40
   3   8   0  109.40    3.64
  -3  -8   0   99.05    5.16
   3   8   0   97.57    3.95
   4   8   0  182.28    4.93
  -4  -8   0  176.12    7.19
   4   8   0  168.01    5.37
  -5  -8   0 2817.60   66.84
   5   8   0 3026.71   57.31
   5   8   0 2941.68   54.38
  -6  -8   0  132.69    7.04
   6   8   0  134.12    5.02
  -7  -8   0  160.08    8.27
   7   8   0  170.36    5.98
  -8  -8   0  138.50    8.05
  -9  -8   0  192.42   10.34
 -10  -8   0    7.25    4.67
 -11  -8   0   39.46    6.49
 -12  -8   0   46.56    7.40
 -13  -8   0  118.34   10.73
 -14  -8   0   88.63    9.85
 -11   9   0  199.34    9.61
 -10   9   0    2.89    3.61
  -9   9   0   -1.23    3.20
  -8   9   0  345.39   11.49
  -7   9   0  283.77    9.85
  -6   9   0   60.93    4.81
  -5   9   0   38.73    3.65
  -4   9   0   47.88    3.86
  -3   9   0  954.13   21.42
  -2   9   0  214.96    6.90
  -1   9   0   53.74    3.51
   0   9   0   18.88    2.09
   1   9   0   96.31    4.07
  -1  -9   0   93.86    4.18
   1   9   0   94.95    3.89
   2   9   0  793.45   17.25
  -2  -9   0  807.17   20.16
   2   9   0  822.30   16.87
   3   9   0   33.86    2.38
  -3  -9   0   26.40    3.20
   3   9   0   34.37    2.54
   4   9   0   16.14    1.65
   4   9   0   11.11    1.88
  -4  -9   0   12.75    2.69
   5   9   0   16.37    2.19
   5   9   0   13.98    1.59
  -5  -9   0   13.98    3.26
  -6  -9   0  117.60    6.82
   6   9   0  121.36    4.94
   7   9   0   36.08    3.07
  -7  -9   0   34.68    4.57
  -8  -9   0   -1.36    3.50
  -9  -9   0  395.27   15.25
 -10  -9   0   -2.41    4.15
 -11  -9   0  643.35   22.45
 -12  -9   0   -0.45    5.20
 -13  -9   0   -8.20    5.39
 -14  -9   0  242.60   15.35
 -11  10   0   32.06    5.50
 -10  10   0  459.49   15.02
  -9  10   0    8.82    3.77
  -8  10   0   80.31    6.01
  -7  10   0   20.65    3.68
  -6  10   0  280.11    9.68
  -5  10   0   -2.50    2.35
  -4  10   0  495.77   13.27
  -3  10   0   58.05    4.13
  -2  10   0 1401.12   29.89
  -1  10   0  607.18   14.47
   0  10   0  104.56    4.42
  -1 -10   0  175.73    5.65
   1  10   0  171.65    5.54
   1  10   0  155.25    5.40
   2  10   0   10.91    1.96
   2  10   0    8.37    1.59
  -2 -10   0    9.08    2.37
  -3 -10   0  178.61    7.40
   3  10   0  174.31    5.79
   3  10   0  184.18    5.47
   4  10   0  912.94   19.39
   4  10   0  944.30   19.69
  -4 -10   0  937.26   24.12
   5  10   0  486.88   11.07
  -5 -10   0  480.37   14.78
   5  10   0  475.83   11.50
   6  10   0  311.10    8.68
  -6 -10   0  308.32   11.50
   7  10   0  219.66    7.25
  -7 -10   0  222.74   10.18
  -8 -10   0 1160.10   31.71
   8  10   0 1168.66   24.70
  -9 -10   0   94.18    8.03
 -10 -10   0   84.70    8.20
 -11 -10   0   59.17    7.67
 -12 -10   0   27.71    6.61
 -13 -10   0   -0.75    5.72
 -14 -10   0   -6.27    6.15
 -10  11   0   20.71    4.77
  -9  11   0  130.70    7.78
  -8  11   0    3.32    3.21
  -7  11   0  382.93   12.42
  -6  11   0  148.86    7.19
  -5  11   0  104.40    5.87
  -4  11   0  130.21    6.30
  -3  11   0  615.20   15.53
  -2  11   0   84.62    4.83
  -1  11   0   12.57    2.36
   0  11   0   68.61    3.80
   1  11   0 1149.90   23.33
   1  11   0 1126.36   24.27
   2  11   0   28.74    2.38
   2  11   0   22.61    2.61
  -3 -11   0 1365.57   33.85
   3  11   0 1423.40   29.08
   3  11   0 1426.12   28.07
  -4 -11   0  740.92   20.32
   4  11   0  745.05   16.31
   5  11   0   52.83    3.70
  -5 -11   0   50.63    4.84
  -6 -11   0   63.05    6.07
   6  11   0   70.49    4.20
   7  11   0   14.14    2.47
  -7 -11   0   19.94    4.60
   8  11   0  236.76    7.96
  -8 -11   0  228.37   11.09
  -9 -11   0   62.66    6.87
 -10 -11   0  509.20   19.04
 -11 -11   0   -1.81    4.90
 -12 -11   0  193.21   12.55
 -13 -11   0  101.38   10.28
 -14 -11   0   58.00    9.47
 -10  12   0   15.91    4.85
  -9  12   0   15.38    4.28
  -8  12   0   68.05    6.03
  -7  12   0   27.28    4.40
  -6  12   0    5.44    3.23
  -5  12   0  348.93   11.30
  -4  12   0  115.38    6.15
  -3  12   0   86.70    5.31
  -2  12   0  551.10   14.26
  -1  12   0   17.37    2.71
   0  12   0  945.08   21.08
   1  12   0  335.11    9.36
   1  12   0  356.61    9.70
   2  12   0 1513.77   31.90
   2  12   0 1559.28   30.72
   3  12   0   39.44    3.30
   3  12   0   45.34    3.21
   4  12   0  267.28    7.38
   4  12   0  266.29    7.97
  -4 -12   0  244.77    9.92
  -5 -12   0   14.20    3.82
   5  12   0   19.56    2.67
  -6 -12   0  877.79   24.84
   6  12   0  896.22   19.60
   7  12   0   55.49    4.31
  -7 -12   0   61.17    6.24
  -8 -12   0   45.50    5.85
   8  12   0   38.70    3.67
   9  12   0   50.13    4.21
  -9 -12   0   58.67    6.64
 -10 -12   0  250.23   12.90
 -11 -12   0   66.97    8.16
 -12 -12   0   37.44    7.22
 -13 -12   0   -2.42    5.65
  -9  13   0   23.72    4.92
  -8  13   0  191.42    9.24
  -7  13   0  121.35    7.32
  -6  13   0   74.21    5.88
  -5  13   0  147.12    7.36
  -4  13   0  335.25   10.92
  -3  13   0 1140.92   26.20
  -2  13   0   53.73    4.52
  -1  13   0   76.20    4.70
   0  13   0    6.36    2.27
   1  13   0  172.37    6.38
   1  13   0  187.98    6.82
   2  13   0   76.23    4.28
   2  13   0   75.42    4.38
   3  13   0   77.31    4.18
   3  13   0   78.63    4.79
   4  13   0  442.08   11.50
   5  13   0   36.92    3.51
   6  13   0  408.10   11.27
  -6 -13   0  410.13   14.66
   7  13   0    1.10    2.28
  -7 -13   0    1.04    4.09
  -8 -13   0   10.92    4.59
   8  13   0    6.66    2.60
   9  13   0  176.87    7.25
  -9 -13   0  171.61   10.78
 -10 -13   0   -8.01    4.71
 -11 -13   0  170.33   11.67
 -12 -13   0   52.89    8.19
 -13 -13   0   26.23    7.68
  -8  14   0   31.45    5.28
  -7  14   0   -2.67    3.38
  -6  14   0   85.50    6.36
  -5  14   0   21.45    4.05
  -4  14   0  587.59   16.29
  -3  14   0 1094.02   25.63
  -2  14   0   35.72    3.87
  -1  14   0  763.44   18.48
   0  14   0   46.10    3.82
   1  14   0  182.89    6.73
   1  14   0  182.83    7.08
   2  14   0   82.74    4.59
   2  14   0   84.19    5.11
   3  14   0  319.93    9.69
   4  14   0  771.32   17.88
   5  14   0  191.37    7.24
   6  14   0   35.90    3.64
   7  14   0  421.31   11.87
  -8 -14   0   56.93    7.03
   8  14   0   71.93    4.64
   9  14   0   39.52    4.04
  -9 -14   0   43.96    6.52
  10  14   0  150.76    7.32
 -10 -14   0  155.12   10.88
 -11 -14   0  170.34   12.29
 -12 -14   0  137.15   12.14
 -13 -14   0  217.74   14.84
  -7  15   0   -2.08    3.82
  -6  15   0   39.65    5.23
  -5  15   0   -5.92    3.03
  -4  15   0  142.10    7.33
  -3  15   0   95.15    6.16
  -2  15   0   73.52    5.33
  -1  15   0 1062.05   24.52
   0  15   0   88.64    5.36
   0  15   0   96.07    5.32
   1  15   0   -2.81    2.51
   1  15   0   -1.55    2.01
   2  15   0  326.70   10.08
   3  15   0   73.19    5.07
   4  15   0   24.82    3.15
   5  15   0   59.74    4.38
   6  15   0    8.51    2.89
   7  15   0   92.78    5.52
   8  15   0   -1.44    2.46
   9  15   0  496.54   14.03
  10  15   0   22.75    3.87
 -10 -15   0   17.55    6.04
 -11 -15   0  125.75   11.01
 -12 -15   0   66.98    9.31
 -13 -15   0   78.92   10.47
  -7  16   0    8.76    4.35
  -6  16   0   32.98    5.10
  -5  16   0    3.99    3.63
  -4  16   0   80.63    6.07
  -3  16   0    4.56    3.05
  -2  16   0  842.47   20.92
  -1  16   0   -1.43    2.54
   0  16   0   44.04    4.06
   0  16   0   45.13    4.41
   1  16   0  258.84    8.76
   1  16   0  261.41    9.09
   2  16   0   65.34    5.18
   3  16   0  623.11   15.88
   4  16   0    0.33    2.70
   5  16   0    3.07    2.74
   6  16   0   61.32    4.89
   7  16   0  172.02    7.31
   8  16   0   91.15    5.88
   9  16   0  138.25    7.06
  10  16   0    1.57    3.01
 -13 -16   0   13.47    7.80
  -6  17   0   69.72    6.46
  -5  17   0    4.45    3.63
  -4  17   0    0.49    3.29
  -3  17   0  192.83    8.58
  -2  17   0  220.10    8.89
  -1  17   0  199.20    8.27
   0  17   0  194.25    7.80
   0  17   0  183.63    8.00
   1  17   0  138.95    7.01
   2  17   0  436.09   12.73
   3  17   0  162.27    7.40
   4  17   0   11.09    3.31
   5  17   0  280.60    9.85
   6  17   0   -1.47    2.70
   7  17   0  129.63    6.86
   8  17   0   71.20    5.52
   9  17   0    3.11    3.01
  10  17   0   37.62    4.65
  11  17   0    7.80    3.86
  -5  18   0   74.94    6.88
  -4  18   0  158.26    8.26
  -3  18   0   13.44    3.79
  -2  18   0   -1.07    2.93
  -1  18   0   -3.66    2.66
  -1  18   0    1.78    3.34
   0  18   0   14.84    3.75
   1  18   0   49.00    4.90
   2  18   0   13.32    3.72
   3  18   0   63.24    5.17
   4  18   0   22.61    3.78
   5  18   0   65.74    5.44
   6  18   0   84.17    5.94
   7  18   0   48.35    4.93
   8  18   0   23.76    4.09
   9  18   0  267.90   10.29
  10  18   0   76.78    6.15
  -4  19   0  151.84    8.45
  -3  19   0   15.31    4.12
  -2  19   0   25.97    4.38
  -1  19   0   92.85    6.72
   0  19   0    5.35    3.66
   1  19   0   31.61    4.57
   2  19   0   39.72    4.93
   3  19   0  299.58   10.68
   4  19   0   21.66    4.20
   5  19   0   23.87    4.34
   6  19   0  204.87    8.98
   7  19   0   20.55    4.21
   8  19   0  104.29    6.86
   9  19   0   40.95    5.02
  -3  20   0   82.58    6.96
  -2  20   0  207.96    9.96
  -1  20   0    9.33    4.47
   0  20   0   52.54    5.65
   1  20   0    2.21    3.65
   2  20   0  109.18    7.06
   3  20   0  418.21   13.27
   4  20   0   74.60    6.17
   5  20   0   19.60    4.32
   6  20   0   26.86    4.57
   7  20   0   66.50    5.89
   8  20   0   62.80    5.86
   1  21   0    3.59    4.19
   2  21   0   51.78    5.65
   3  21   0   13.96    4.23
   4  21   0    5.22    3.91
   5  21   0   15.22    4.36
   6  21   0  181.34    9.07
   5  21  -1    8.25    4.09
   4  21  -1   20.80    4.55
   3  21  -1   -4.74    3.35
   2  21  -1    1.95    3.96
   8  20  -1   52.20    5.66
   7  20  -1    8.65    4.00
   6  20  -1    4.28    3.73
   5  20  -1    8.60    3.84
   4  20  -1   -3.71    3.32
   3  20  -1   48.66    5.19
   2  20  -1   54.62    5.43
   1  20  -1   17.71    4.26
   0  20  -1  141.37    8.10
  -1  20  -1   -4.14    3.90
  -3  20  -1  179.87    9.15
   9  19  -1   87.01    6.53
   8  19  -1    2.18    3.41
   7  19  -1   59.67    5.48
   6  19  -1   16.60    3.98
   5  19  -1    8.88    3.68
   4  19  -1   24.25    4.21
   3  19  -1   17.84    3.89
   2  19  -1  193.27    8.66
   1  19  -1  219.10    9.26
   0  19  -1   29.49    4.71
  -1  19  -1    6.34    3.94
  -2  19  -1  217.43    9.33
  -3  19  -1   61.63    5.88
  -4  19  -1   12.95    4.45
  10  18  -1   79.96    6.27
   9  18  -1    1.19    3.18
   8  18  -1   22.77    4.13
   7  18  -1  152.72    7.72
   6  18  -1  133.83    7.11
   5  18  -1    4.85    3.30
   4  18  -1  207.27    8.54
   3  18  -1   18.02    3.77
   2  18  -1   21.01    4.06
   1  18  -1   64.86    5.37
   0  18  -1    5.92    3.44
  -1  18  -1   31.76    4.55
  -1  18  -1   37.96    4.35
  -2  18  -1    7.83    3.33
  -3  18  -1   23.63    4.34
  -4  18  -1   -5.09    3.33
  -5  18  -1  246.59   10.77
  11  17  -1    0.35    3.50
  10  17  -1  406.19   13.08
   9  17  -1  217.51    9.05
   8  17  -1    5.77    3.20
   7  17  -1    2.87    3.00
   6  17  -1  176.94    7.77
   5  17  -1   -1.73    2.74
   4  17  -1   34.49    4.13
   3  17  -1   -1.87    2.77
   2  17  -1  167.47    7.62
   1  17  -1  460.44   13.29
   0  17  -1   21.69    3.98
   0  17  -1   27.14    3.78
  -1  17  -1   -1.01    2.69
  -2  17  -1   -3.35    2.82
  -3  17  -1   16.68    3.87
  -4  17  -1  117.69    7.19
  -5  17  -1   13.97    4.24
  -6  17  -1   36.12    5.50
  10  16  -1   31.63    4.35
   9  16  -1  270.41    9.87
   8  16  -1  263.27    9.55
   7  16  -1   59.19    5.01
   6  16  -1   83.89    5.51
   5  16  -1   -1.78    2.66
   4  16  -1  714.88   17.57
   3  16  -1   23.11    3.63
   2  16  -1  483.58   13.38
   1  16  -1   87.48    5.32
   1  16  -1   89.38    5.39
   0  16  -1    4.29    3.09
   0  16  -1   11.11    2.87
  -1  16  -1  513.58   14.44
  -2  16  -1    2.45    3.01
  -3  16  -1  959.52   23.67
  -4  16  -1  175.41    8.34
  -5  16  -1   55.20    5.54
  -6  16  -1   48.86    5.67
 -13 -15   1   16.49    7.80
 -12 -15   1  216.21   14.13
 -11 -15   1  467.93   19.77
  10  15  -1  384.23   12.21
   9  15  -1   27.83    3.98
   8  15  -1   12.25    3.15
   7  15  -1  165.89    7.21
   6  15  -1  110.75    5.92
   5  15  -1   50.57    4.32
   4  15  -1  858.94   19.84
   3  15  -1  669.60   16.46
   2  15  -1   47.87    3.94
   2  15  -1   49.39    4.22
   1  15  -1    2.00    2.42
   1  15  -1    2.48    2.36
   0  15  -1  182.03    7.37
   0  15  -1  199.07    7.70
  -1  15  -1   87.07    5.43
  -2  15  -1  285.09    9.89
  -3  15  -1  141.93    7.11
  -4  15  -1  143.97    7.38
  -5  15  -1  146.16    7.69
  -6  15  -1  262.62   10.73
  -7  15  -1  225.44   10.37
 -13 -14   1    1.34    6.51
 -12 -14   1  246.84   14.99
 -11 -14   1  195.93   12.55
 -10 -14   1  165.37   11.34
  10  14  -1  167.90    7.66
   9  14  -1   72.91    5.19
  -9 -14   1   79.72    8.02
   8  14  -1  384.34   11.37
   7  14  -1  148.87    6.68
   6  14  -1  216.43    7.88
   5  14  -1  410.17   11.44
   4  14  -1   22.28    2.97
   3  14  -1   -0.67    2.35
   2  14  -1  138.52    5.87
   2  14  -1  128.70    5.81
   1  14  -1   92.36    5.06
   1  14  -1   89.28    5.30
   0  14  -1 1426.95   31.07
  -1  14  -1    7.48    2.79
  -2  14  -1  230.48    8.47
  -3  14  -1  691.83   17.95
  -4  14  -1  232.43    9.13
  -5  14  -1   14.83    3.72
  -6  14  -1   58.72    5.55
  -7  14  -1   -3.10    3.53
  -8  14  -1   32.92    5.40
 -13 -13   1  212.54   14.33
 -12 -13   1  222.94   13.95
 -11 -13   1    9.71    5.53
 -10 -13   1  202.39   11.70
   9  13  -1   37.87    3.91
  -9 -13   1   42.56    6.53
   8  13  -1  312.53    9.73
  -8 -13   1  295.89   13.15
   7  13  -1   20.61    3.15
  -7 -13   1   29.02    5.29
   6  13  -1  101.64    5.41
  -6 -13   1  114.72    7.63
   4  13  -1  225.45    7.63
   3  13  -1   32.23    2.96
   3  13  -1   31.23    3.38
   2  13  -1   18.74    2.94
   2  13  -1   17.76    2.56
   1  13  -1  420.17   11.20
   1  13  -1  410.73   11.21
   0  13  -1    6.55    2.44
  -1  13  -1   18.74    3.01
  -2  13  -1 1089.09   24.87
  -3  13  -1  321.77   10.49
  -4  13  -1  260.68    9.48
  -5  13  -1  121.91    6.81
  -6  13  -1   47.04    5.01
  -7  13  -1   -4.05    3.04
  -8  13  -1   43.92    5.43
  -9  13  -1  143.11    8.78
 -13 -12   1  230.41   14.46
 -12 -12   1   74.88    8.92
 -11 -12   1  272.28   14.10
 -10 -12   1   -4.52    4.27
   9  12  -1  133.31    6.25
  -9 -12   1  126.46    9.47
  -8 -12   1   -0.26    3.72
   8  12  -1    3.16    2.34
  -7 -12   1  681.87   20.83
   7  12  -1  702.54   16.40
  -6 -12   1    7.54    3.83
   6  12  -1   11.42    2.66
  -5 -12   1  340.68   12.18
   5  12  -1  345.62    9.54
   4  12  -1  574.54   13.87
   4  12  -1  596.45   13.87
   3  12  -1    5.19    2.24
   3  12  -1    8.31    1.93
   2  12  -1    4.58    1.85
   2  12  -1    0.36    2.06
   1  12  -1 1698.66   33.66
   1  12  -1 1698.07   35.41
   0  12  -1   59.70    4.13
  -1  12  -1  266.88    8.49
  -2  12  -1  790.98   18.98
  -3  12  -1   63.52    4.87
  -4  12  -1  732.67   18.56
  -5  12  -1  316.94   10.73
  -6  12  -1  150.03    7.46
  -7  12  -1  190.35    8.70
  -8  12  -1  325.03   12.01
  -9  12  -1   -4.33    3.61
 -14 -11   1  202.38   14.36
 -13 -11   1   86.83    9.96
 -12 -11   1   33.65    7.13
 -11 -11   1  255.71   13.57
 -10 -11   1  247.48   12.65
  -9 -11   1   21.63    5.15
   8  11  -1    5.55    2.41
  -8 -11   1    3.28    3.94
   7  11  -1  129.83    5.71
  -7 -11   1  134.93    8.12
  -6 -11   1   -1.06    3.11
   6  11  -1    2.39    2.04
   5  11  -1  388.75   10.28
  -5 -11   1  393.99   12.98
   5  11  -1  404.42    9.93
  -4 -11   1    1.60    2.55
   4  11  -1    3.79    1.85
   4  11  -1    4.64    1.62
   3  11  -1    6.01    1.97
  -3 -11   1    9.63    2.64
   3  11  -1    8.57    1.81
   2  11  -1   22.10    2.57
   2  11  -1   16.64    2.19
   1  11  -1  727.51   16.65
   0  11  -1  109.52    4.90
  -1  11  -1    9.82    2.28
  -2  11  -1   30.76    3.26
  -3  11  -1   52.98    4.45
  -4  11  -1  710.71   17.83
  -5  11  -1    1.88    2.69
  -6  11  -1  876.98   21.86
  -7  11  -1  279.98   10.36
  -8  11  -1   -4.86    2.95
  -9  11  -1   -1.54    3.43
 -10  11  -1    1.73    4.08
 -14 -10   1   91.54   10.59
 -13 -10   1   15.46    6.72
 -12 -10   1  706.92   24.88
 -11 -10   1    9.20    5.29
 -10 -10   1   66.24    7.19
  -9 -10   1    9.62    4.40
  -8 -10   1   18.72    4.52
   8  10  -1    9.58    2.53
  -7 -10   1  350.82   12.96
   7  10  -1  351.56    9.74
  -6 -10   1  245.38    9.99
   6  10  -1  242.42    7.48
   5  10  -1   84.31    3.66
  -5 -10   1   80.04    5.68
   5  10  -1   83.49    4.14
   4  10  -1  797.54   17.55
  -4 -10   1  818.23   21.21
   3  10  -1    9.36    1.70
   2  10  -1   32.84    2.89
  -2 -10   1   34.97    3.60
   2  10  -1   33.74    2.75
   1  10  -1  924.23   19.24
   1  10  -1  918.20   20.06
   0  10  -1  479.01   11.83
  -1  10  -1  651.99   15.39
  -2  10  -1   96.61    4.82
  -3  10  -1  867.95   20.19
  -4  10  -1  185.34    7.25
  -5  10  -1  577.51   15.36
  -6  10  -1    2.27    2.79
  -7  10  -1  115.12    6.53
  -8  10  -1  209.56    9.05
  -9  10  -1  102.48    6.92
 -10  10  -1    1.57    3.91
 -11  10  -1  186.41    9.86
 -14  -9   1   11.00    7.08
 -13  -9   1  128.85   10.57
 -12  -9   1    0.68    5.20
 -11  -9   1   12.38    5.43
 -10  -9   1  110.79    8.74
  -9  -9   1   83.00    7.50
  -8  -9   1  348.44   13.46
   7   9  -1  916.48   19.78
  -7  -9   1  928.31   25.43
   6   9  -1  166.63    5.68
   6   9  -1  167.95    5.12
  -6  -9   1  156.81    7.72
   5   9  -1  333.30    8.82
   5   9  -1  351.63    8.51
  -5  -9   1  332.40   11.31
   4   9  -1    0.20    1.42
  -4  -9   1   -1.80    2.10
   4   9  -1    0.17    1.17
   3   9  -1    0.94    1.41
   3   9  -1    2.78    1.30
  -3  -9   1    4.00    2.22
   2   9  -1  346.21    8.80
  -2  -9   1  348.96   10.14
   2   9  -1  358.32    8.81
  -1  -9   1  517.85   12.80
   1   9  -1  512.51   11.71
   1   9  -1  509.86   12.04
   0   9  -1  561.04   13.13
  -1   9  -1  153.36    5.57
  -2   9  -1  653.99   15.49
  -3   9  -1    6.70    2.12
  -4   9  -1   15.71    2.64
  -5   9  -1  450.57   12.57
  -6   9  -1   10.86    2.99
  -7   9  -1   80.46    5.54
  -8   9  -1  196.73    8.53
  -9   9  -1  251.33   10.02
 -10   9  -1    4.58    3.71
 -11   9  -1   91.77    7.13
 -14  -8   1  119.51   11.74
 -13  -8   1  166.71   12.15
 -12  -8   1  293.00   14.71
 -11  -8   1   81.04    8.38
 -10  -8   1  113.30    8.88
  -9  -8   1  446.43   16.31
  -8  -8   1  146.68    8.62
  -7  -8   1   71.22    5.92
   7   8  -1   76.94    4.15
  -6  -8   1   43.08    4.32
   6   8  -1   43.87    3.16
  -5  -8   1  311.02   10.86
   5   8  -1  334.93    7.98
   5   8  -1  312.19    8.28
  -4  -8   1   51.69    4.31
   4   8  -1   55.93    2.82
   4   8  -1   48.16    3.04
   3   8  -1   40.75    2.80
  -3  -8   1   40.97    3.64
   3   8  -1   43.58    2.53
   2   8  -1  127.02    4.37
  -2  -8   1  130.01    5.32
   2   8  -1  131.34    4.52
   1   8  -1  362.87    8.89
  -1  -8   1  388.94    9.91
   1   8  -1  372.53    9.17
   0   8  -1   10.24    1.71
  -1   8  -1  566.33   13.26
  -2   8  -1  260.78    7.66
  -3   8  -1    1.76    1.70
  -4   8  -1  102.45    4.92
  -5   8  -1  239.15    8.04
  -6   8  -1   17.37    3.13
  -7   8  -1  692.76   17.75
  -8   8  -1  550.65   15.36
  -9   8  -1   14.38    3.73
 -10   8  -1   76.65    6.11
 -11   8  -1  191.20    9.21
 -12   8  -1   -4.24    3.64
 -14  -7   1   60.65    8.93
 -13  -7   1   27.96    7.08
 -12  -7   1  106.87    9.63
 -11  -7   1   81.13    8.32
 -10  -7   1   85.04    7.89
  -9  -7   1  435.31   15.71
  -8  -7   1  143.72    8.34
  -7  -7   1   85.02    6.20
   6   7  -1    4.24    1.66
  -6  -7   1    4.74    2.73
   5   7  -1   24.14    2.09
  -5  -7   1   20.80    3.20
   5   7  -1   23.42    1.87
  -4  -7   1  484.57   13.57
   4   7  -1  480.82   10.78
   4   7  -1  476.38   10.77
   3   7  -1 1238.55   25.10
  -3  -7   1 1216.11   29.11
   3   7  -1 1246.36   23.94
  -2  -7   1  268.18    7.90
   2   7  -1  268.47    6.69
   2   7  -1  265.89    6.77
   1   7  -1  137.89    4.42
   1   7  -1  135.43    4.41
  -1  -7   1  136.23    4.82
   0   7  -1 1778.36   35.80
  -1   7  -1  154.95    5.18
  -2   7  -1  375.79    8.81
  -2   7  -1  353.14    9.38
  -3   7  -1  365.04    9.32
  -3   7  -1  353.10    9.55
  -4   7  -1  535.18   13.66
  -4   7  -1  527.40   13.15
  -6   7  -1  223.78    7.86
  -7   7  -1  293.36    9.62
  -8   7  -1    7.99    3.00
  -9   7  -1  205.42    8.47
 -10   7  -1    5.99    3.28
 -11   7  -1  170.87    8.47
 -12   7  -1    2.21    3.78
 -14  -6   1  202.45   13.22
 -13  -6   1  136.17   11.02
 -12  -6   1    1.42    5.00
 -11  -6   1   45.41    6.41
 -10  -6   1   45.47    6.03
  -9  -6   1    0.38    3.77
  -8  -6   1  200.50    9.71
  -7  -6   1    1.87    2.80
  -6  -6   1  264.40    9.99
   6   6  -1  265.19    7.25
   5   6  -1  775.48   16.15
  -5  -6   1  785.77   20.68
   4   6  -1  300.96    7.37
   4   6  -1  305.02    7.20
  -4  -6   1  286.09    9.53
   3   6  -1 1231.52   23.61
   3   6  -1 1260.24   24.90
  -3  -6   1 1199.73   28.88
  -2  -6   1   31.09    2.62
   2   6  -1   29.82    2.01
   2   6  -1   31.12    2.09
   1   6  -1   85.32    3.11
  -1  -6   1   90.12    3.48
   1   6  -1   85.03    3.08
   0   6  -1  701.96   15.08
  -1   6  -1   15.19    1.75
  -2   6  -1  579.24   13.42
  -2   6  -1  574.90   13.22
  -3   6  -1  114.35    4.15
  -3   6  -1  106.28    4.43
  -4   6  -1 2619.14   58.65
  -4   6  -1 2642.90   52.90
  -5   6  -1  313.42    9.57
  -5   6  -1  301.63    8.86
  -6   6  -1  486.97   14.12
  -6   6  -1  492.27   12.84
  -7   6  -1   10.35    2.71
  -7   6  -1    8.13    3.16
  -8   6  -1  439.92   12.64
 -10   6  -1    0.22    2.91
 -11   6  -1   35.41    4.77
 -12   6  -1   14.09    4.12
 -13   6  -1   13.53    4.44
 -14  -5   1  676.79   25.38
 -13  -5   1  102.77    9.30
 -12  -5   1   81.64    8.40
 -11  -5   1  108.73    8.40
 -10  -5   1  219.01   11.26
  -9  -5   1   16.49    4.49
  -8  -5   1 1286.29   33.58
  -7  -5   1   68.69    5.62
  -6  -5   1   79.42    5.18
  -5  -5   1 1129.08   27.95
   4   5  -1  449.56    9.83
  -4  -5   1  444.01   12.59
   4   5  -1  437.37    9.71
   3   5  -1   10.30    1.32
   3   5  -1    9.87    1.15
  -3  -5   1    9.07    1.96
  -2  -5   1  829.10   19.89
   2   5  -1  850.21   17.30
   2   5  -1  847.64   16.38
   1   5  -1  719.22   14.40
  -1  -5   1  730.64   17.04
   1   5  -1  753.84   15.34
   0   5  -1  190.41    5.15
  -1   5  -1  752.78   16.04
  -2   5  -1  175.59    5.31
  -2   5  -1  179.98    4.95
  -3   5  -1   62.01    3.31
  -3   5  -1   64.54    3.23
  -4   5  -1 3792.04   74.45
  -4   5  -1 3768.57   83.32
  -5   5  -1  289.78    9.19
  -5   5  -1  292.75    8.35
  -6   5  -1 1418.46   34.14
  -6   5  -1 1418.28   30.30
  -7   5  -1  315.09   10.99
  -7   5  -1  292.09    9.19
  -8   5  -1   32.95    4.37
  -8   5  -1   34.40    3.69
  -9   5  -1   45.49    4.29
  -9   5  -1   48.32    5.21
 -10   5  -1   81.07    5.63
 -11   5  -1   11.68    3.60
 -12   5  -1    4.92    3.66
 -13   5  -1    9.07    4.25
 -14  -4   1   40.90    7.89
 -13  -4   1  866.55   28.64
 -12  -4   1   56.27    7.31
 -11  -4   1    6.66    4.51
 -10  -4   1    6.04    4.36
  -9  -4   1  117.44    8.07
  -8  -4   1  184.00    8.74
  -7  -4   1    2.54    2.41
  -6  -4   1    2.10    2.45
  -5  -4   1 1312.23   31.83
   4   4  -1  327.04    7.58
  -4  -4   1  333.69   10.05
   3   4  -1  103.37    3.11
   3   4  -1   97.68    3.24
  -3  -4   1   98.42    4.40
  -2  -4   1  823.75   19.10
   2   4  -1  795.82   16.46
   2   4  -1  810.81   15.59
  -1  -4   1  777.25   17.94
   1   4  -1  781.88   15.99
   0   4  -1   34.05    2.24
  -1   4  -1 2139.97   42.18
  -2   4  -1  356.46    8.36
  -2   4  -1  344.91    8.63
  -3   4  -1  619.88   13.66
  -3   4  -1  604.83   14.84
  -4   4  -1 1226.03   25.89
  -4   4  -1 1253.81   28.99
  -5   4  -1    0.67    1.93
  -5   4  -1   -0.76    1.41
  -6   4  -1  208.80    7.92
  -6   4  -1  209.80    6.83
  -7   4  -1  270.95    8.54
  -7   4  -1  280.73   10.30
  -8   4  -1  509.20   13.39
  -8   4  -1  490.58   15.94
  -9   4  -1   -0.90    2.46
  -9   4  -1    3.24    3.75
 -10   4  -1  129.70    8.73
 -10   4  -1  119.90    6.29
 -11   4  -1   11.04    3.61
 -11   4  -1   10.51    4.71
 -12   4  -1    2.64    3.38
 -13   4  -1   24.61    4.54
 -14   4  -1   42.34    5.58
 -14  -3   1  289.58   15.65
 -13  -3   1  490.56   19.81
 -12  -3   1  143.63   10.33
 -11  -3   1   64.82    7.08
 -10  -3   1  138.10    9.13
  -9  -3   1   62.11    6.02
  -8  -3   1  794.37   22.67
  -7  -3   1   41.88    4.19
  -6  -3   1  103.53    5.95
  -5  -3   1  343.88   10.87
  -4  -3   1  687.77   17.59
  -3  -3   1   48.44    3.16
   3   3  -1   46.30    2.20
   2   3  -1 2860.78   51.40
   2   3  -1 2881.96   55.36
  -2  -3   1 2814.51   62.85
   1   3  -1   15.04    1.21
  -1  -3   1   15.10    1.53
   1   3  -1   17.20    1.54
   0   3  -1 4321.49   84.23
  -1   3  -1  313.17    7.40
  -2   3  -1   74.23    2.89
  -2   3  -1   74.34    2.90
  -3   3  -1   70.90    2.99
  -3   3  -1   73.18    3.34
  -4   3  -1  362.18    8.97
  -4   3  -1  363.78   10.21
  -5   3  -1 1505.78   35.55
  -5   3  -1 1525.80   31.28
  -6   3  -1    2.88    1.65
  -6   3  -1    3.52    2.21
  -7   3  -1   18.58    2.52
  -7   3  -1   16.04    3.24
  -8   3  -1  507.41   16.35
  -8   3  -1  525.04   13.43
  -9   3  -1 1281.31   28.72
  -9   3  -1 1310.93   34.06
 -10   3  -1  384.07   11.80
 -10   3  -1  421.95   15.35
 -11   3  -1  108.20    6.20
 -11   3  -1  109.06    8.80
 -12   3  -1   32.25    4.42
 -12   3  -1   38.47    6.32
 -13   3  -1   62.93    5.77
 -14   3  -1   11.04    4.42
 -14  -2   1  367.43   17.49
 -13  -2   1  154.58   11.21
 -12  -2   1   68.14    7.73
 -11  -2   1  122.74    9.17
 -10  -2   1   19.39    4.90
  -9  -2   1  268.51   11.34
  -8  -2   1  990.85   26.76
  -7  -2   1  218.22    8.92
  -6  -2   1  880.13   22.95
  -3  -2   1 2205.13   49.41
   2   2  -1  592.02   11.48
  -2  -2   1  591.24   14.41
   2   2  -1  573.62   12.18
  -1  -2   1 1681.66   36.98
   1   2  -1 1666.15   30.21
   1   2  -1 1655.13   32.63
   0   2  -1   40.63    1.70
  -1   2  -1 3808.56   85.06
  -2   2  -1  211.44    5.37
  -2   2  -1  204.88    5.91
  -3   2  -1  189.68    5.10
  -3   2  -1  190.64    5.98
  -4   2  -1 3629.56   80.62
  -4   2  -1 3664.95   71.16
  -5   2  -1  157.77    5.14
  -5   2  -1  159.75    6.43
  -6   2  -1  106.91    4.35
  -6   2  -1  100.31    5.57
  -7   2  -1   72.30    5.37
  -7   2  -1   76.09    3.99
  -8   2  -1  225.79    7.42
  -8   2  -1  216.38    9.60
  -9   2  -1   53.83    4.52
  -9   2  -1   56.16    5.71
 -10   2  -1  487.98   13.40
 -10   2  -1  476.71   16.84
 -11   2  -1   35.20    5.92
 -11   2  -1   24.00    3.75
 -12   2  -1  333.16   11.24
 -12   2  -1  350.12   15.25
 -13   2  -1    5.03    3.56
 -13   2  -1    1.49    5.23
 -14  -1   1  545.78   21.84
 -13  -1   1  287.33   14.77
 -12  -1   1 1763.08   38.12
 -12  -1   1 1772.77   47.19
 -11  -1   1   16.35    5.20
 -10  -1   1  282.13   12.27
  -9  -1   1    0.35    3.52
  -8  -1   1  363.04   12.99
  -7  -1   1   45.48    4.52
  -6  -1   1   51.01    4.31
  -5  -1   1 2517.19   57.36
  -4  -1   1  768.06   19.11
  -3  -1   1 1702.64   38.60
  -2  -1   1  212.84    6.14
   1   1  -1  684.15   14.04
  -1  -1   1  717.75   16.03
   0   1  -1    5.74    0.78
  -1   1  -1  301.28    7.32
  -1   1  -1  307.39    6.52
  -2   1  -1   44.85    2.19
  -2   1  -1   48.58    2.77
  -3   1  -1   87.00    2.95
  -3   1  -1   83.19    3.84
  -4   1  -1 4153.73   80.00
  -4   1  -1 4092.75   90.90
  -5   1  -1    9.33    2.29
  -5   1  -1    3.42    1.41
  -6   1  -1   33.10    3.54
  -6   1  -1   34.71    2.75
  -7   1  -1    2.11    1.61
  -7   1  -1    1.17    2.63
  -8   1  -1    5.06    3.23
  -8   1  -1    2.98    1.90
  -9   1  -1   89.51    4.99
  -9   1  -1   87.09    7.02
 -10   1  -1    7.94    4.52
 -10   1  -1    4.88    2.77
 -11   1  -1   38.61    4.10
 -11   1  -1   35.05    5.82
 -12   1  -1  114.92    9.29
 -12   1  -1   95.13    6.16
 -13   1  -1   -6.76    2.99
 -13   1  -1   -8.10    4.74
 -14   1  -1  798.60   27.99
 -14   0   1    1.56    5.73
 -13   0   1  879.09   28.48
 -13   0   1  873.71   21.89
 -12   0   1  533.58   19.70
 -12   0   1  520.98   14.63
 -11   0   1  141.38    9.58
 -11   0   1  149.30    6.63
 -10   0   1   23.02    4.76
  -9   0   1  195.45    9.76
  -8   0   1   92.68    6.60
  -7   0   1   25.02    3.72
  -6   0   1  289.57   10.14
  -5   0   1  504.08   14.02
  -4   0   1 2240.79   50.70
  -3   0   1 2594.30   57.63
  -2   0   1 4084.32   89.91
  -1   0   1 6426.98  143.18
  -1   0  -1 3639.78   82.35
  -1   0  -1 3727.44   73.27
  -2   0  -1 1291.04   28.77
  -2   0  -1 1249.59   24.98
  -3   0  -1    9.39    1.98
  -4   0  -1 2160.21   48.95
  -5   0  -1 1767.04   41.22
  -6   0  -1  422.53   12.93
  -7   0  -1   12.58    3.17
  -7   0  -1   13.57    1.93
  -8   0  -1  485.53   15.81
  -8   0  -1  490.60   12.13
  -9   0  -1  422.63   15.07
  -9   0  -1  430.62   11.42
 -10   0  -1  276.93    8.86
 -10   0  -1  264.14   12.03
 -11   0  -1  281.52   13.04
 -11   0  -1  274.34    9.28
 -12   0  -1  111.98    9.15
 -12   0  -1   86.04    6.06
 -13   0  -1   -4.48    5.03
 -14   0  -1    2.48    6.10
 -14   1   1    0.28    5.66
 -13   1   1    4.09    5.16
 -13   1   1    3.29    3.45
 -12   1   1   91.08    6.16
 -12   1   1  102.46    8.92
 -11   1   1  535.59   14.52
 -11   1   1  532.76   19.05
 -10   1   1  956.33   21.82
 -10   1   1  920.16   27.05
  -9   1   1  702.83   21.17
  -8   1   1 1012.24   27.08
  -7   1   1   11.04    3.09
  -6   1   1  135.49    6.53
  -5   1   1   85.96    4.98
  -4   1   1  247.99    7.90
  -3   1   1 2924.83   64.68
  -2   1   1  265.37    7.25
  -1   1   1 8025.79  178.08
  -1  -1  -1 8449.85  188.63
   1   1   1 8510.61  154.04
  -2  -1  -1  777.29   18.22
  -3  -1  -1 1953.42   44.07
  -4  -1  -1   18.78    2.46
  -5  -1  -1 2522.53   57.51
  -6  -1  -1  475.59   14.24
  -7  -1  -1  141.56    7.32
  -8  -1  -1  297.53   11.57
  -9  -1  -1   12.23    4.08
  -9  -1  -1    8.04    2.19
 -10  -1  -1    6.18    4.16
 -10  -1  -1    7.67    2.55
 -11  -1  -1  217.35    7.89
 -11  -1  -1  197.15   10.77
 -12  -1  -1    6.60    5.14
 -12  -1  -1   -3.18    2.98
 -13  -1  -1  136.62   10.77
 -14  -1  -1   81.97    9.45
 -14   2   1  344.22   12.43
 -14   2   1  352.95   16.99
 -13   2   1   -6.46    4.76
 -13   2   1    0.24    3.46
 -12   2   1   32.99    6.16
 -12   2   1   30.35    4.23
 -11   2   1    6.62    4.49
 -11   2   1    7.63    3.17
 -10   2   1  123.41    6.25
 -10   2   1  132.89    8.52
  -9   2   1  258.95    8.52
  -9   2   1  259.32   11.16
  -8   2   1  175.03    8.49
  -7   2   1  220.45    8.99
  -6   2   1  488.65   14.31
  -5   2   1 1237.41   29.75
  -4   2   1  135.57    5.36
  -3   2   1 2588.80   57.43
  -2   2   1  112.87    4.15
  -1   2   1  639.61   14.69
   0  -2  -1   16.14    1.32
   1   2   1    6.59    0.65
  -1  -2  -1    8.29    1.20
   2   2   1    7.29    0.94
  -2  -2  -1    5.40    1.62
  -3  -2  -1 6403.97  139.54
  -4  -2  -1  428.83   12.11
  -5  -2  -1  507.99   14.45
  -6  -2  -1   87.08    5.37
  -7  -2  -1  513.98   15.86
  -8  -2  -1    4.86    2.95
  -9  -2  -1  180.94    9.46
 -10  -2  -1    7.60    4.38
 -10  -2  -1   11.98    2.57
 -11  -2  -1  138.39    9.52
 -11  -2  -1  140.02    6.18
 -12  -2  -1  315.49   14.46
 -13  -2  -1  110.74   10.16
 -14  -2  -1   35.09    7.87
 -14   3   1  115.86    7.69
 -13   3   1   12.52    4.02
 -13   3   1    5.15    5.96
 -12   3   1   16.15    3.86
 -12   3   1   20.39    5.97
 -11   3   1   85.09    5.77
 -11   3   1   94.56    8.51
 -10   3   1  106.84    5.88
 -10   3   1  103.08    7.74
  -9   3   1  371.86   10.93
  -9   3   1  370.07   13.67
  -8   3   1  179.14    8.62
  -8   3   1  180.41    6.72
  -7   3   1  296.86   10.74
  -7   3   1  298.63    8.55
  -6   3   1  178.31    7.42
  -5   3   1  122.75    5.63
  -4   3   1  229.21    7.36
  -3   3   1  433.20   11.24
  -2   3   1  100.21    3.65
  -1   3   1  472.18   11.16
  -1   3   1  471.18    9.98
   0   3   1  497.47    9.97
   0  -3  -1  474.05   11.48
   1   3   1  780.29   15.27
  -1  -3  -1  737.37   17.78
   2   3   1 4512.58   92.09
  -2  -3  -1 4782.66  101.76
   2   3   1 4655.78   83.57
  -3  -3  -1  204.83    6.95
   3   3   1  205.21    5.00
  -4  -3  -1  773.89   19.49
  -5  -3  -1  757.70   19.82
  -6  -3  -1   -0.94    2.14
  -7  -3  -1  145.02    7.27
  -8  -3  -1   73.87    6.23
  -9  -3  -1  370.36   13.80
 -10  -3  -1  261.86   12.18
 -11  -3  -1   17.41    5.24
 -12  -3  -1   98.11    9.11
 -13  -3  -1    5.62    5.45
 -14  -3  -1   11.30    6.53
 -14   4   1    5.00    4.23
 -13   4   1   12.56    4.10
 -12   4   1    4.05    5.20
 -12   4   1    3.48    3.44
 -11   4   1  743.54   18.95
 -11   4   1  691.64   22.91
 -10   4   1    6.13    3.05
 -10   4   1   16.07    4.37
  -9   4   1   57.11    5.88
  -9   4   1   69.76    4.88
  -8   4   1    4.65    3.19
  -8   4   1    3.16    2.37
  -7   4   1   79.77    5.95
  -7   4   1   73.82    4.43
  -6   4   1   33.38    3.65
  -6   4   1   37.63    3.17
  -5   4   1  535.03   12.70
  -5   4   1  539.38   14.70
  -4   4   1  219.01    7.17
  -4   4   1  216.07    6.28
  -3   4   1    4.56    1.24
  -3   4   1    3.43    1.33
  -2   4   1 1691.25   33.46
  -2   4   1 1670.64   37.47
  -1   4   1   69.21    2.70
  -1   4   1   66.65    2.65
   0   4   1 1435.06   27.96
   0  -4  -1 1399.10   31.82
   1   4   1  206.63    4.70
   1   4   1  200.57    4.83
  -1  -4  -1  196.33    6.45
   2   4   1   13.17    1.36
   2   4   1   16.22    1.29
  -2  -4  -1   16.49    2.29
  -3  -4  -1 1984.20   44.97
   3   4   1 1978.77   36.39
   4   4   1   71.17    2.81
  -4  -4  -1   76.51    4.49
  -5  -4  -1 2596.77   59.41
  -6  -4  -1 1395.78   34.35
  -7  -4  -1  346.07   12.19
  -8  -4  -1  120.15    7.14
  -9  -4  -1  135.77    8.15
 -10  -4  -1    8.19    4.42
 -11  -4  -1   19.18    5.33
 -12  -4  -1    9.47    5.24
 -13  -4  -1  187.75   11.89
 -14  -4  -1  144.42   12.02
 -13   5   1  170.44    8.79
 -12   5   1  294.30   11.07
 -11   5   1  232.01    9.33
 -10   5   1   96.02    7.48
 -10   5   1   94.84    5.93
  -9   5   1   -1.76    2.44
  -9   5   1    2.22    3.63
  -8   5   1   32.09    3.66
  -8   5   1   34.99    4.68
  -7   5   1    3.60    2.31
  -7   5   1    4.50    2.82
  -6   5   1  481.99   14.09
  -6   5   1  489.49   12.39
  -5   5   1  127.98    5.80
  -5   5   1  121.73    4.91
  -4   5   1  185.83    5.92
  -4   5   1  195.18    6.58
  -3   5   1  419.80   10.87
  -3   5   1  412.06    9.94
  -2   5   1  128.43    4.14
  -2   5   1  124.06    4.04
  -1   5   1  172.02    4.67
   0  -5  -1  560.23   13.36
   0   5   1  566.09   11.88
  -1  -5  -1 6387.80  145.24
   1   5   1 6844.73  129.95
   1   5   1 6792.91  121.70
   2   5   1  399.68    8.31
  -2  -5  -1  388.43   10.73
   3   5   1  223.78    5.61
   3   5   1  233.36    5.11
  -3  -5  -1  222.86    7.45
  -4  -5  -1 1591.95   38.14
   4   5   1 1671.39   30.72
  -5  -5  -1  673.86   18.48
   5   5   1  703.13   14.48
  -6  -5  -1   65.21    5.22
  -7  -5  -1 1598.78   39.51
  -8  -5  -1   59.50    5.94
  -9  -5  -1    1.59    3.30
 -10  -5  -1   49.62    5.84
 -11  -5  -1   -2.20    4.21
 -12  -5  -1   -1.45    4.60
 -13  -5  -1   94.90    9.33
 -14  -5  -1  248.93   15.07
 -13   6   1   28.20    5.20
 -12   6   1   36.12    5.05
 -11   6   1   18.22    4.11
 -10   6   1   -0.02    2.99
  -9   6   1   49.10    4.54
  -9   6   1   52.14    5.31
  -8   6   1    5.07    2.74
  -8   6   1    6.64    3.33
  -7   6   1  116.55    5.67
  -7   6   1  106.39    6.60
  -6   6   1  217.97    8.32
  -6   6   1  208.00    7.26
  -5   6   1   64.00    3.86
  -5   6   1   63.94    4.34
  -4   6   1    3.39    1.80
  -4   6   1    2.61    1.65
  -3   6   1   82.66    3.71
  -3   6   1   84.76    3.75
  -2   6   1  132.03    4.42
  -2   6   1  131.34    4.30
  -1   6   1 1121.20   23.00
   0   6   1  229.68    5.74
   0  -6  -1  220.29    6.20
   1   6   1  354.83    7.98
   1   6   1  359.64    7.98
  -1  -6  -1  358.95    9.71
   2   6   1 3155.33   61.28
  -2  -6  -1 3168.66   70.28
   3   6   1   21.99    1.73
  -3  -6  -1   20.68    2.53
   3   6   1   21.00    1.45
  -4  -6  -1  310.53   10.11
   4   6   1  327.12    7.72
   5   6   1   29.95    2.52
  -5  -6  -1   20.23    3.19
  -6  -6  -1  784.03   21.40
  -7  -6  -1   63.78    5.59
  -8  -6  -1 1219.94   32.30
  -9  -6  -1   20.90    4.71
 -10  -6  -1   28.45    5.43
 -11  -6  -1  120.83    9.41
 -12  -6  -1  104.51    9.64
 -13  -6  -1   72.95    8.81
 -14  -6  -1    0.17    6.47
 -12   7   1   58.62    6.04
 -11   7   1   32.66    4.81
 -10   7   1  347.05   11.75
  -9   7   1   18.17    3.67
  -8   7   1   84.41    5.37
  -7   7   1  351.17   10.64
  -7   7   1  339.89   11.80
  -6   7   1  970.62   22.20
  -6   7   1  969.97   24.66
  -5   7   1   92.04    4.95
  -5   7   1   95.03    4.67
  -4   7   1    4.52    1.81
  -4   7   1    3.31    1.80
  -3   7   1  656.23   14.98
  -3   7   1  651.01   15.93
  -2   7   1   10.33    1.45
  -2   7   1   10.84    1.84
  -1   7   1   22.94    2.01
   0   7   1   40.77    2.45
   0  -7  -1   44.92    2.59
  -1  -7  -1  250.39    7.57
   1   7   1  252.06    6.37
   1   7   1  255.98    6.25
  -2  -7  -1   30.91    2.91
   2   7   1   32.36    1.92
   2   7   1   28.97    2.11
  -3  -7  -1 1350.56   31.85
   3   7   1 1349.83   26.62
   3   7   1 1318.67   25.63
   4   7   1   15.58    1.86
  -4  -7  -1   15.35    2.79
   4   7   1   15.89    1.30
   5   7   1   -0.87    1.28
  -5  -7  -1   -1.75    2.28
   6   7   1  192.45    5.99
  -6  -7  -1  187.75    8.15
  -7  -7  -1  353.34   12.67
  -8  -7  -1   68.16    5.99
  -9  -7  -1   74.45    7.25
 -10  -7  -1  185.29   10.55
 -11  -7  -1   63.53    7.52
 -12  -7  -1   11.25    5.67
 -13  -7  -1  116.57   10.72
 -14  -7  -1    9.82    6.75
 -12   8   1   -4.77    3.79
 -11   8   1  492.88   15.49
 -10   8   1  477.18   14.70
  -9   8   1  607.46   16.83
  -8   8   1  206.18    8.30
  -7   8   1  274.14    9.37
  -6   8   1   64.57    4.54
  -5   8   1    1.30    1.99
  -5   8   1    3.83    2.25
  -4   8   1   90.56    4.43
  -4   8   1   83.71    4.33
  -3   8   1   62.94    3.37
  -3   8   1   69.78    3.84
  -2   8   1  203.03    6.31
  -2   8   1  215.57    5.99
  -1   8   1   34.96    2.17
  -1   8   1   31.88    2.68
   0  -8  -1 1868.85   41.72
   0   8   1 1858.80   37.38
  -1  -8  -1 1678.13   37.98
   1   8   1 1658.21   33.41
   1   8   1 1670.03   31.70
  -2  -8  -1 3483.81   79.16
   2   8   1 3575.04   64.97
   2   8   1 3623.18   69.24
   3   8   1   18.35    1.50
   3   8   1   11.54    1.76
  -3  -8  -1   16.35    2.89
  -4  -8  -1    0.09    2.40
   4   8   1    1.66    1.40
   4   8   1    1.63    0.91
  -5  -8  -1   75.69    5.48
   5   8   1   86.29    3.86
  -6  -8  -1  788.98   21.86
   6   8   1  793.69   16.92
   7   8   1  502.95   12.11
  -7  -8  -1  490.89   16.00
  -8  -8  -1  551.64   17.97
  -9  -8  -1   84.94    7.53
 -10  -8  -1   -3.77    4.19
 -11  -8  -1  188.35   11.13
 -12  -8  -1  142.01   10.99
 -13  -8  -1    6.52    5.57
 -14  -8  -1   11.86    6.95
 -11   9   1  624.05   18.44
 -10   9   1  178.51    8.68
  -9   9   1   10.83    3.78
  -8   9   1 1000.61   24.27
  -7   9   1  173.08    7.54
  -6   9   1  970.45   22.79
  -5   9   1  311.87    9.60
  -4   9   1  244.78    7.88
  -3   9   1  159.69    5.88
  -2   9   1  262.55    7.65
  -2   9   1  261.59    7.09
  -1   9   1   12.61    2.06
   0   9   1  408.76    9.99
   0  -9  -1  407.09   10.42
   1   9   1  922.61   18.48
   1   9   1  876.47   18.98
  -1  -9  -1  898.80   21.44
   2   9   1    9.85    1.83
   2   9   1   10.64    1.54
  -2  -9  -1   14.65    2.75
   3   9   1 1135.41   22.51
   3   9   1 1153.62   23.12
  -3  -9  -1 1100.11   27.79
   4   9   1  439.83   10.35
   4   9   1  435.35    9.79
  -4  -9  -1  434.28   13.32
   5   9   1  475.96   10.42
   5   9   1  473.44   11.20
  -5  -9  -1  469.99   14.54
   6   9   1   12.27    2.13
  -6  -9  -1   11.58    3.37
   7   9   1 2391.96   46.16
  -7  -9  -1 2446.96   58.01
  -8  -9  -1 1291.34   34.45
  -9  -9  -1  107.93    8.37
 -10  -9  -1   30.69    5.97
 -11  -9  -1    2.02    4.98
 -12  -9  -1  256.21   14.16
 -13  -9  -1   96.10   10.10
 -14  -9  -1   95.80   10.85
 -11  10   1   74.66    6.87
 -10  10   1   13.72    4.21
  -9  10   1  206.31    9.15
  -8  10   1    6.31    3.49
  -7  10   1    3.90    2.85
  -6  10   1   25.75    3.65
  -5  10   1  449.09   12.60
  -4  10   1  722.34   17.44
  -3  10   1  148.50    5.93
  -2  10   1  289.00    8.49
  -1  10   1  135.85    5.23
   0  10   1    4.69    1.61
   0 -10  -1    0.59    1.44
  -1 -10  -1  126.15    5.02
   1  10   1  122.74    4.51
   1  10   1  126.86    4.78
   2  10   1    1.35    1.30
   2  10   1    2.50    1.62
  -2 -10  -1    3.32    2.41
   3  10   1   -0.16    1.11
   3  10   1    0.49    1.51
  -3 -10  -1    0.61    2.57
  -4 -10  -1  427.48   13.60
   4  10   1  436.43   10.61
   4  10   1  444.91   10.02
   5  10   1  720.84   14.97
   5  10   1  685.93   15.42
  -5 -10  -1  689.03   19.73
  -6 -10  -1    0.70    3.12
   6  10   1    4.05    1.86
  -7 -10  -1  404.99   14.46
   7  10   1  416.20   10.84
  -8 -10  -1  178.61    9.76
   8  10   1  172.01    6.66
  -9 -10  -1    0.00    4.01
 -10 -10  -1   83.05    7.76
 -11 -10  -1  104.09    9.54
 -12 -10  -1   31.69    6.43
 -13 -10  -1  286.21   15.69
 -14 -10  -1   31.91    8.27
 -10  11   1   12.77    4.40
  -9  11   1   -7.13    3.10
  -8  11   1  185.30    8.44
  -7  11   1   35.47    4.31
  -6  11   1    9.89    3.04
  -5  11   1  258.80    9.06
  -4  11   1    6.08    2.72
  -3  11   1  662.01   16.27
  -2  11   1   75.74    4.50
  -1  11   1  256.64    7.77
   0  11   1  398.93   10.30
   1  11   1  648.26   14.80
   1  11   1  652.45   14.58
   2  11   1  652.76   14.85
  -2 -11  -1  679.36   17.49
  -3 -11  -1  221.93    8.64
   3  11   1  218.41    6.19
   3  11   1  208.47    6.55
   4  11   1   17.35    2.22
  -5 -11  -1   22.77    4.08
   5  11   1   23.63    2.63
   6  11   1  197.43    6.73
  -6 -11  -1  186.95    9.37
   7  11   1 1308.65   26.66
  -7 -11  -1 1261.27   33.87
   8  11   1    7.18    2.51
  -8 -11  -1   12.69    4.50
  -9 -11  -1   86.71    7.91
 -10 -11  -1   16.43    5.34
 -11 -11  -1  236.61   12.79
 -12 -11  -1  198.88   12.78
 -13 -11  -1   57.98    8.84
 -14 -11  -1   17.75    7.55
 -10  12   1   56.13    6.28
  -9  12   1   21.76    4.41
  -8  12   1    4.34    3.49
  -7  12   1  265.87   10.18
  -6  12   1  287.80   10.31
  -5  12   1    3.34    2.91
  -4  12   1   70.18    5.08
  -3  12   1   32.48    3.60
  -2  12   1  270.87    8.72
  -1  12   1   39.02    3.37
   0  12   1  565.45   13.71
   1  12   1  394.11   10.11
   1  12   1  383.18   10.28
   2  12   1  752.74   16.82
  -4 -12  -1  266.73   10.46
   4  12   1  273.61    8.09
  -5 -12  -1    7.60    3.32
   5  12   1   10.92    2.37
  -6 -12  -1  105.71    7.35
   6  12   1  101.31    5.08
   7  12   1  575.76   14.06
  -7 -12  -1  570.12   18.89
  -8 -12  -1 1061.43   30.06
   9  12   1    9.14    2.73
  -9 -12  -1   11.04    4.96
 -10 -12  -1   96.68    9.03
 -11 -12  -1 1229.85   36.34
 -12 -12  -1    9.53    6.04
 -13 -12  -1   15.65    6.89
  -9  13   1  124.26    8.02
  -8  13   1  102.79    7.08
  -7  13   1    0.14    3.28
  -6  13   1  165.73    7.93
  -5  13   1   38.19    4.35
  -4  13   1   76.76    5.37
  -3  13   1   13.98    3.16
  -2  13   1  748.91   18.21
  -1  13   1   -1.32    2.07
   0  13   1  112.91    5.20
   1  13   1  439.70   11.53
   1  13   1  460.85   11.75
   2  13   1   87.74    4.35
   2  13   1   82.75    4.80
   3  13   1   87.07    4.22
   3  13   1  101.41    5.08
   4  13   1    3.33    2.15
   5  13   1   87.71    4.81
  -5 -13  -1   83.76    6.81
  -6 -13  -1   24.38    4.95
   6  13   1   25.63    3.19
   7  13   1  580.38   14.61
  -7 -13  -1  604.62   19.66
   8  13   1   42.82    3.84
  -8 -13  -1   41.98    6.39
 -10 -13  -1   22.03    5.94
 -11 -13  -1   25.56    6.66
 -12 -13  -1   19.86    7.04
 -13 -13  -1  177.29   13.43
  -8  14   1   44.63    5.71
  -7  14   1  134.09    7.80
  -6  14   1  150.07    7.88
  -5  14   1  478.55   14.32
  -4  14   1  361.62   11.63
  -3  14   1  102.48    6.17
  -2  14   1  303.17    9.83
  -1  14   1  268.84    8.80
   0  14   1   13.06    2.61
   1  14   1   22.33    2.88
   1  14   1   24.75    3.24
   2  14   1   88.96    5.12
   2  14   1   87.92    4.56
   3  14   1   21.77    2.88
   4  14   1   68.93    4.61
   5  14   1    5.73    2.49
   6  14   1    5.20    2.36
   7  14   1    2.01    2.44
  -7 -14  -1    0.26    4.28
  -8 -14  -1    5.82    4.56
   8  14   1   -2.02    2.19
   9  14   1   57.87    4.40
  -9 -14  -1   48.71    6.88
 -10 -14  -1  198.79   12.09
  10  14   1  182.76    8.00
 -11 -14  -1   43.04    7.73
 -12 -14  -1  140.70   11.92
 -13 -14  -1  406.05   19.99
  -8  15   1   34.96    5.52
  -7  15   1   92.53    7.10
  -6  15   1   -2.03    3.14
  -5  15   1   -4.73    2.95
  -4  15   1  303.85   10.72
  -3  15   1  634.12   16.92
  -2  15   1  454.08   12.99
  -1  15   1    0.19    2.48
   0  15   1  365.56   10.67
   1  15   1  102.20    5.40
   1  15   1   99.51    5.18
   2  15   1  300.66    9.52
   3  15   1   69.45    4.69
   4  15   1  621.60   15.35
   5  15   1   13.68    2.80
   6  15   1   22.57    3.33
   7  15   1    3.53    2.62
   8  15   1   34.25    3.91
   9  15   1  178.78    7.66
  -9 -15  -1  173.46   11.08
  10  15   1   13.88    3.49
 -10 -15  -1   10.09    6.17
 -11 -15  -1   28.30    7.20
 -12 -15  -1  633.09   24.76
 -13 -15  -1   71.64   10.13
  -7  16   1  132.50    8.20
  -6  16   1  108.45    7.33
  -5  16   1   -2.54    3.10
  -4  16   1   94.24    6.46
  -3  16   1    4.30    3.11
  -2  16   1   33.96    4.05
  -1  16   1   16.23    3.19
   0  16   1  409.31   11.90
   0  16   1  421.13   12.07
   1  16   1   35.81    3.72
   2  16   1  120.93    6.22
   3  16   1   53.71    4.51
   4  16   1  354.00   10.80
   5  16   1    2.15    2.64
   6  16   1    1.58    2.63
   7  16   1   -3.42    2.45
   8  16   1   97.06    5.93
   9  16   1  196.68    8.25
  10  16   1    7.44    3.16
 -11 -16  -1  151.45   12.01
 -12 -16  -1   74.80    9.83
 -13 -16  -1   42.67    9.02
  -6  17   1    5.91    4.24
  -5  17   1   72.71    6.38
  -4  17   1   20.59    4.15
  -3  17   1  228.25    9.26
  -2  17   1   66.96    5.39
  -1  17   1   25.33    3.74
   0  17   1   60.43    5.00
   0  17   1   52.61    4.84
   1  17   1    4.31    2.77
   2  17   1  670.62   16.98
   3  17   1  109.56    6.00
   4  17   1  489.98   13.65
   5  17   1   55.38    4.78
   6  17   1    2.48    2.92
   7  17   1  154.16    7.34
   8  17   1   65.23    5.31
   9  17   1   39.69    4.61
  10  17   1    6.11    3.30
  11  17   1  267.62   10.69
  -5  18   1   21.62    4.71
  -4  18   1  104.82    7.10
  -3  18   1  179.35    8.40
  -2  18   1   -2.88    2.79
  -1  18   1   60.72    5.36
   0  18   1    1.28    3.29
   1  18   1    1.75    3.19
   2  18   1   10.49    3.60
   3  18   1  191.46    8.15
   4  18   1  322.43   10.79
   5  18   1   70.81    5.55
   6  18   1    2.40    2.74
   7  18   1    3.85    3.16
   8  18   1    8.59    3.16
   9  18   1   82.75    6.08
  10  18   1   49.49    5.10
  -4  19   1   37.83    5.24
  -3  19   1  143.69    7.79
  -2  19   1   21.64    4.09
  -1  19   1   37.94    4.95
   0  19   1    3.29    3.49
   1  19   1   -2.01    3.25
   2  19   1   81.43    6.14
   3  19   1  150.37    7.51
   4  19   1   86.93    6.16
   5  19   1  687.51   18.13
   6  19   1    4.76    3.60
   7  19   1   63.80    5.53
   8  19   1    7.40    3.60
   9  19   1    1.40    3.30
  -4  20   1  111.29    7.75
  -3  20   1   32.58    5.00
  -1  20   1   -1.97    3.83
   0  20   1   -0.76    3.52
   1  20   1    1.01    3.62
   2  20   1  104.41    6.91
   3  20   1  105.68    6.78
   4  20   1  147.87    7.81
   5  20   1    6.12    3.73
   6  20   1    7.75    3.84
   7  20   1  141.50    7.92
   8  20   1  288.89   11.18
   0  21   1  593.69   17.29
   1  21   1    2.36    3.98
   2  21   1    7.27    4.10
   3  21   1  192.68    9.02
   4  21   1   -2.78    3.50
   5  21   1  261.16   10.68
   6  21   1   65.31    6.03
   3  21  -2    1.07    3.74
   7  20  -2  246.81   10.40
   6  20  -2   18.11    4.64
   5  20  -2  316.41   11.67
   4  20  -2   -0.62    3.66
   3  20  -2   26.13    4.56
   2  20  -2    9.37    4.14
   1  20  -2  229.99    9.98
   0  20  -2   18.08    4.66
  -1  20  -2    0.06    4.15
   9  19  -2   32.00    4.77
   8  19  -2   12.92    4.00
   7  19  -2   70.99    5.98
   6  19  -2   96.26    6.62
   5  19  -2   -0.06    3.44
   4  19  -2    6.62    3.78
   3  19  -2  106.18    6.59
   2  19  -2   40.14    4.83
   1  19  -2   46.13    5.20
   0  19  -2   21.11    4.40
  -1  19  -2   59.60    5.84
  -2  19  -2    4.98    3.51
  -3  19  -2    5.46    3.76
  10  18  -2   36.21    4.78
   9  18  -2  186.46    8.70
   8  18  -2  117.41    7.00
   7  18  -2  152.24    7.75
   6  18  -2    4.47    3.16
   5  18  -2  217.48    8.93
   4  18  -2   67.87    5.55
   3  18  -2   65.28    5.38
   2  18  -2  400.07   12.56
   1  18  -2  213.40    8.95
   0  18  -2  154.24    7.78
  -1  18  -2    0.92    3.33
  -1  18  -2   -1.28    2.76
  -2  18  -2    1.51    3.10
  -3  18  -2   42.08    5.10
  -4  18  -2  593.38   17.83
  10  17  -2   73.43    5.97
   9  17  -2  346.00   11.75
   8  17  -2   31.60    4.27
   7  17  -2   41.86    4.50
   6  17  -2   -1.38    2.81
   5  17  -2   53.30    4.78
   4  17  -2   14.55    3.38
   3  17  -2    9.70    3.43
   2  17  -2   14.47    3.74
   1  17  -2   26.46    4.04
   0  17  -2   47.18    4.51
   0  17  -2   48.97    4.73
  -1  17  -2   11.44    3.30
  -2  17  -2  217.54    9.01
  -3  17  -2    7.10    3.41
  -4  17  -2    9.53    3.70
  -5  17  -2   67.61    6.20
  10  16  -2  375.33   12.28
   9  16  -2  381.06   12.14
   8  16  -2   31.91    4.13
   7  16  -2   23.14    3.78
   6  16  -2  436.00   12.68
   5  16  -2    5.54    2.96
   4  16  -2  173.92    7.42
   3  16  -2  527.59   14.21
   2  16  -2   22.53    3.68
   1  16  -2   40.96    4.03
   1  16  -2   36.15    4.15
   0  16  -2   62.77    5.00
   0  16  -2   61.78    4.97
  -1  16  -2   15.31    3.46
  -2  16  -2   85.25    5.99
  -3  16  -2  120.60    6.94
  -4  16  -2  195.71    8.82
  -5  16  -2    1.78    3.42
  -6  16  -2   -0.92    3.55
 -13 -15   2    8.39    7.74
  10  15  -2   33.03    4.25
   9  15  -2  246.95    9.29
   8  15  -2  455.60   13.11
   7  15  -2  576.54   15.13
   6  15  -2  207.40    7.99
   5  15  -2  453.15   12.63
   4  15  -2  327.10   10.18
   3  15  -2  495.35   13.31
   2  15  -2   51.45    4.32
   2  15  -2   43.37    4.20
   1  15  -2   65.71    4.74
   1  15  -2   64.20    4.92
   0  15  -2   12.09    3.01
   0  15  -2   15.91    3.33
  -1  15  -2   42.36    4.15
  -2  15  -2  668.29   17.55
  -3  15  -2   20.28    3.82
  -4  15  -2   13.41    3.68
  -5  15  -2    9.69    3.68
  -6  15  -2  241.31   10.32
  -7  15  -2  329.38   12.76
 -13 -14   2   49.06    9.35
 -12 -14   2  244.69   14.86
 -11 -14   2    4.28    5.60
  10  14  -2   10.11    3.46
 -10 -14   2    5.44    5.06
   9  14  -2  463.05   13.19
   8  14  -2   59.97    4.77
   7  14  -2    4.65    2.68
   6  14  -2  276.63    9.12
   5  14  -2  297.82    9.33
   4  14  -2   28.47    3.46
   3  14  -2  297.24    9.29
   3  14  -2  314.08    9.41
   2  14  -2  492.68   13.13
   2  14  -2  502.83   13.08
   1  14  -2   51.14    4.14
   1  14  -2   51.64    4.24
   0  14  -2  256.14    8.74
  -1  14  -2  215.74    8.16
  -2  14  -2   20.90    3.52
  -3  14  -2   69.15    5.30
  -4  14  -2   51.56    4.86
  -5  14  -2    1.19    3.05
  -6  14  -2   39.97    4.84
  -7  14  -2  120.77    7.78
  -8  14  -2   35.69    5.57
 -13 -13   2  235.46   14.76
 -12 -13   2  103.14   10.61
 -11 -13   2   29.52    6.90
 -10 -13   2  227.91   12.39
   9  13  -2  203.30    7.85
  -9 -13   2  186.41   10.70
  -8 -13   2    8.60    4.59
   8  13  -2    9.97    2.85
   7  13  -2  472.14   12.70
  -7 -13   2  479.91   16.21
   6  13  -2  390.48   11.00
   5  13  -2   26.67    3.24
   3  13  -2   -4.98    2.06
   3  13  -2    0.46    1.98
   2  13  -2  259.99    8.39
   2  13  -2  267.50    8.37
   1  13  -2  139.16    6.12
   1  13  -2  142.88    6.06
   0  13  -2    1.89    2.26
  -1  13  -2  737.73   18.04
  -2  13  -2    4.43    2.75
  -3  13  -2  177.24    7.49
  -4  13  -2   45.41    4.50
  -5  13  -2   36.51    4.48
  -6  13  -2   10.90    3.62
  -7  13  -2   -2.45    3.17
  -8  13  -2  328.00   12.47
  -9  13  -2   30.25    5.33
 -13 -12   2  223.28   14.38
 -12 -12   2   60.61    8.20
 -11 -12   2   80.29    8.52
 -10 -12   2   19.01    5.92
   9  12  -2    3.83    2.56
  -9 -12   2    3.36    4.72
   8  12  -2  173.70    7.01
  -8 -12   2  183.37    9.87
   7  12  -2  183.83    6.94
  -7 -12   2  181.58    9.56
  -6 -12   2  489.76   15.70
   6  12  -2  499.99   12.67
   5  12  -2  270.26    8.33
   4  12  -2  470.05   11.70
   4  12  -2  448.00   11.63
   3  12  -2   49.00    3.93
   3  12  -2   54.52    3.74
   2  12  -2  144.01    5.84
   2  12  -2  141.35    5.69
   1  12  -2   62.66    4.32
   1  12  -2   66.52    4.13
   0  12  -2  274.01    8.48
  -1  12  -2  411.14   11.42
  -2  12  -2    1.44    2.39
  -3  12  -2 1370.84   30.53
  -4  12  -2    4.67    2.94
  -5  12  -2   68.98    5.43
  -6  12  -2    4.19    3.19
  -7  12  -2  173.73    8.34
  -8  12  -2  263.91   10.76
  -9  12  -2   17.22    4.68
 -13 -11   2    9.82    6.43
 -12 -11   2    4.94    5.54
 -11 -11   2   73.54    8.14
 -10 -11   2   45.53    6.56
  -9 -11   2  211.07   11.23
  -8 -11   2  133.27    8.67
   8  11  -2  134.04    5.95
  -7 -11   2   -1.18    3.25
   7  11  -2    4.06    2.37
  -6 -11   2 1186.86   30.76
   6  11  -2 1194.30   24.81
   5  11  -2   80.27    4.36
   5  11  -2   80.43    4.03
  -5 -11   2   74.12    5.65
   4  11  -2  258.58    7.44
  -4 -11   2  246.39    9.13
   4  11  -2  245.55    7.59
   3  11  -2  352.38    9.52
   3  11  -2  368.12    9.64
   2  11  -2  982.10   21.65
   2  11  -2  985.38   20.70
   1  11  -2  218.89    7.09
   1  11  -2  228.54    7.21
   0  11  -2  252.02    7.81
  -1  11  -2   69.68    4.21
  -2  11  -2  278.54    8.81
  -3  11  -2   26.88    3.39
  -4  11  -2  152.79    6.91
  -5  11  -2  427.70   12.75
  -6  11  -2    1.81    3.10
  -7  11  -2    4.25    3.22
  -8  11  -2  237.18   10.00
  -9  11  -2   -2.45    3.56
 -10  11  -2  353.58   13.45
 -14 -10   2   -5.28    6.14
 -13 -10   2  356.78   17.43
 -12 -10   2   -3.95    4.81
 -11 -10   2    8.98    5.09
 -10 -10   2   47.31    6.53
  -9 -10   2    7.06    4.24
  -8 -10   2  212.39   10.38
   8  10  -2  217.89    7.49
   7  10  -2  434.51   11.24
  -7 -10   2  420.25   14.58
   6  10  -2   29.25    2.47
  -6 -10   2   27.20    4.12
   6  10  -2   24.27    2.70
   5  10  -2   13.96    1.96
   5  10  -2   13.92    2.23
  -5 -10   2   13.07    3.05
  -4 -10   2  685.80   18.35
   4  10  -2  677.61   15.43
   3  10  -2  219.64    6.62
   3  10  -2  218.32    6.63
  -3 -10   2  224.64    7.87
   2  10  -2   50.02    3.28
   2  10  -2   43.48    3.27
  -2 -10   2   49.11    3.68
   1  10  -2   57.60    3.62
   1  10  -2   57.96    3.35
   0  10  -2  310.77    8.75
  -2  10  -2    9.58    2.30
  -3  10  -2   42.25    3.74
  -4  10  -2  315.98    9.99
  -5  10  -2   40.48    4.12
  -6  10  -2   83.85    5.64
  -7  10  -2  371.48   12.11
  -8  10  -2   -1.84    3.04
  -9  10  -2  184.86    8.88
 -10  10  -2   -5.29    3.58
 -14  -9   2    8.66    6.94
 -13  -9   2  143.45   11.64
 -12  -9   2   29.04    6.03
 -11  -9   2   89.33    8.74
 -10  -9   2  194.86   11.04
  -9  -9   2  304.87   13.11
  -8  -9   2  155.71    8.87
  -7  -9   2  506.96   16.10
   7   9  -2  479.92   12.07
   6   9  -2   -0.82    1.28
   6   9  -2    0.86    1.65
  -6  -9   2   -2.60    2.49
  -5  -9   2   19.94    3.32
   5   9  -2   24.59    2.21
   5   9  -2   23.59    2.47
  -4  -9   2  689.57   18.56
   4   9  -2  720.18   15.76
   4   9  -2  706.54   15.27
   3   9  -2  297.64    7.86
   3   9  -2  308.59    8.02
  -3  -9   2  289.90    9.25
  -2  -9   2  131.45    5.30
   2   9  -2  128.03    4.73
   2   9  -2  128.84    4.73
   1   9  -2  131.84    4.95
  -1  -9   2  134.84    4.74
   1   9  -2  141.59    4.97
  -1   9  -2  965.00   21.24
  -2   9  -2  158.29    6.02
  -3   9  -2  125.04    5.62
  -4   9  -2  382.19   10.97
  -5   9  -2   65.02    4.84
  -6   9  -2  363.87   11.32
  -7   9  -2   69.08    5.40
  -8   9  -2   15.74    3.77
  -9   9  -2    0.07    3.12
 -10   9  -2   78.14    6.62
 -11   9  -2   13.27    4.49
 -14  -8   2   13.90    7.02
 -13  -8   2  172.13   12.23
 -12  -8   2   -0.56    4.98
 -11  -8   2   24.66    5.96
 -10  -8   2  715.98   22.92
  -9  -8   2  935.35   27.16
  -8  -8   2  138.65    8.43
  -7  -8   2   95.72    6.67
   7   8  -2   98.42    4.56
  -6  -8   2  523.03   15.68
   6   8  -2  484.19   11.77
   5   8  -2   76.78    3.45
   5   8  -2   74.93    3.72
  -5  -8   2   68.31    4.97
   4   8  -2   13.16    1.74
   4   8  -2   12.11    1.70
  -4  -8   2   11.33    2.45
  -3  -8   2  154.42    6.01
   3   8  -2  150.68    4.87
   3   8  -2  150.78    4.93
   2   8  -2  176.97    5.51
   2   8  -2  174.55    5.45
  -2  -8   2  189.09    6.13
  -1  -8   2 1163.48   26.49
   1   8  -2 1144.86   24.26
   1   8  -2 1165.71   22.88
   0   8  -2  115.72    4.57
  -1   8  -2   81.75    3.96
  -3   8  -2  477.62   12.26
  -4   8  -2  338.38    9.83
  -5   8  -2    0.63    2.18
  -6   8  -2  193.64    7.59
  -7   8  -2    8.10    3.02
  -8   8  -2   83.20    5.78
  -9   8  -2   38.81    4.71
 -10   8  -2   -0.03    3.20
 -11   8  -2  141.81    8.19
 -12   8  -2   34.41    5.46
 -14  -7   2   77.93    9.54
 -13  -7   2  115.19   10.39
 -12  -7   2   99.13    9.46
 -11  -7   2  186.22   11.21
 -10  -7   2  611.22   20.70
  -9  -7   2    9.13    4.18
  -8  -7   2  980.33   27.36
  -7  -7   2   78.73    6.03
   6   7  -2  117.26    4.58
  -6  -7   2  116.84    6.52
   5   7  -2 3238.33   63.38
   5   7  -2 3210.97   59.50
  -5  -7   2 3241.60   73.30
   4   7  -2 3788.50   69.58
  -4  -7   2 3775.71   85.15
   4   7  -2 3889.49   74.52
   3   7  -2  211.05    5.86
   3   7  -2  210.30    5.83
  -3  -7   2  211.60    7.19
  -2  -7   2  488.42   12.35
   2   7  -2  468.41   11.03
   2   7  -2  479.66   10.59
   1   7  -2  415.66    9.95
  -1  -7   2  416.58   10.43
   0   7  -2  932.26   19.92
  -1   7  -2  991.04   21.24
  -2   7  -2  228.31    6.93
  -3   7  -2   42.29    2.73
  -3   7  -2   42.36    3.38
  -4   7  -2   19.11    2.54
  -5   7  -2    8.67    2.33
  -6   7  -2   12.73    2.77
  -7   7  -2   11.79    3.08
  -8   7  -2  647.03   17.04
  -9   7  -2   99.86    6.14
 -10   7  -2  244.60    9.79
 -11   7  -2   62.01    5.82
 -12   7  -2  285.58   11.54
 -14  -6   2   18.11    6.84
 -13  -6   2    6.84    5.67
 -12  -6   2   22.51    6.08
 -11  -6   2   98.23    8.20
 -10  -6   2   -0.72    4.08
  -9  -6   2    1.16    3.84
  -8  -6   2  681.13   20.45
  -7  -6   2   57.89    5.39
   6   6  -2  997.77   20.58
  -6  -6   2 1026.63   26.32
   5   6  -2  380.93    9.19
  -5  -6   2  402.94   12.17
   5   6  -2  378.57    9.17
  -4  -6   2    4.67    2.17
   4   6  -2    5.07    1.43
   4   6  -2    3.32    1.24
  -3  -6   2   69.85    3.91
   3   6  -2   65.58    2.93
   3   6  -2   68.86    3.02
   2   6  -2  212.53    5.64
   2   6  -2  214.99    5.86
  -2  -6   2  225.30    6.73
  -1  -6   2  116.46    3.94
   1   6  -2  126.60    3.95
   1   6  -2  121.16    4.08
   0   6  -2  772.64   16.63
  -1   6  -2  575.35   13.07
  -2   6  -2 1401.52   29.69
  -2   6  -2 1471.26   32.31
  -3   6  -2  668.03   15.66
  -3   6  -2  639.94   15.08
  -4   6  -2  551.52   13.45
  -4   6  -2  551.09   14.09
  -5   6  -2 1782.04   37.93
  -5   6  -2 1863.33   42.09
  -6   6  -2  219.03    7.61
  -6   6  -2  227.08    8.43
  -7   6  -2  267.23    8.94
  -8   6  -2   52.49    4.67
  -9   6  -2   23.53    3.68
 -10   6  -2    8.47    3.27
 -11   6  -2   96.52    6.54
 -12   6  -2   30.17    4.75
 -13   6  -2   90.88    7.32
 -14  -5   2  264.66   15.26
 -13  -5   2   65.33    8.30
 -12  -5   2   64.79    7.82
 -11  -5   2   20.13    5.35
 -10  -5   2  107.14    7.97
  -9  -5   2 1212.56   32.88
  -8  -5   2  216.63    9.90
  -7  -5   2   -1.98    2.46
  -6  -5   2 1585.88   38.48
  -5  -5   2 1804.66   42.67
   5   5  -2 1824.54   34.27
  -4  -5   2   24.16    2.85
   4   5  -2   23.83    2.05
   4   5  -2   23.54    1.92
  -3  -5   2   14.14    2.03
   3   5  -2   12.94    1.42
   3   5  -2   14.84    1.46
  -2  -5   2   12.92    1.73
   2   5  -2   16.23    1.50
   2   5  -2   15.35    1.41
   1   5  -2   16.13    1.41
  -1  -5   2   12.19    1.34
   1   5  -2   14.57    1.45
   0   5  -2  340.76    8.16
  -1   5  -2 1295.82   26.52
  -2   5  -2 1513.56   32.14
  -2   5  -2 1649.19   35.35
  -3   5  -2 1100.27   25.28
  -3   5  -2 1099.91   23.36
  -4   5  -2  238.27    7.21
  -4   5  -2  248.07    7.70
  -5   5  -2 1067.10   23.19
  -5   5  -2 1048.17   25.65
  -6   5  -2  167.76    7.18
  -6   5  -2  161.57    6.22
  -7   5  -2    6.44    3.08
  -7   5  -2    5.85    2.54
  -8   5  -2  110.58    5.75
  -8   5  -2  107.65    7.07
  -9   5  -2    8.00    2.93
 -10   5  -2   42.28    4.50
 -11   5  -2  105.04    6.43
 -12   5  -2  172.48    8.45
 -13   5  -2    1.21    3.79
 -14  -4   2    6.14    6.17
 -13  -4   2   48.04    7.73
 -12  -4   2  342.27   15.59
 -11  -4   2   11.07    5.02
 -10  -4   2   62.31    6.63
  -9  -4   2  500.58   17.08
  -8  -4   2   35.17    4.38
  -7  -4   2  713.65   20.28
  -6  -4   2  559.68   16.17
  -5  -4   2    2.22    2.35
   4   4  -2 7120.41  127.94
  -4  -4   2 7210.69  156.51
  -3  -4   2 1553.78   35.88
   3   4  -2 1576.12   31.20
   2   4  -2  119.25    3.61
  -2  -4   2  120.34    4.37
   2   4  -2  116.68    3.39
  -1  -4   2   33.01    2.14
   1   4  -2   35.98    2.11
   1   4  -2   36.27    1.97
   0   4  -2 1683.78   33.49
  -1   4  -2 2052.09   40.67
  -2   4  -2 1711.20   34.89
  -2   4  -2 1762.62   38.66
  -3   4  -2 1362.29   30.60
  -3   4  -2 1323.51   27.65
  -4   4  -2  330.11    8.86
  -4   4  -2  360.72    9.94
  -5   4  -2  757.63   17.08
  -5   4  -2  746.02   19.15
  -6   4  -2  382.88   10.18
  -6   4  -2  360.17   11.55
  -7   4  -2  761.27   18.01
  -7   4  -2  763.37   20.83
  -8   4  -2   27.87    3.48
  -8   4  -2   24.30    4.41
  -9   4  -2  321.68   12.45
  -9   4  -2  300.53    9.92
 -10   4  -2  100.48    5.91
 -10   4  -2  107.54    7.85
 -11   4  -2  202.16    8.51
 -12   4  -2   10.43    3.67
 -13   4  -2   18.20    4.24
 -14   4  -2   62.14    6.24
 -14  -3   2   11.33    6.25
 -13  -3   2   48.32    7.66
 -12  -3   2   96.47    8.97
 -11  -3   2   -1.53    4.04
 -10  -3   2   58.59    6.42
  -9  -3   2  432.26   15.45
  -8  -3   2  183.39    8.95
  -6  -3   2    3.97    2.57
  -5  -3   2   83.97    5.20
  -4  -3   2 3337.42   74.40
   3   3  -2   81.66    2.80
  -3  -3   2   87.66    4.15
   3   3  -2   84.07    2.93
   2   3  -2  472.02   10.30
   2   3  -2  479.63    9.57
  -2  -3   2  478.39   11.93
   1   3  -2  479.53   10.27
   1   3  -2  464.62    9.36
  -1  -3   2  472.47   11.26
   0   3  -2 1199.15   24.06
  -1   3  -2    7.79    1.36
  -2   3  -2   83.13    3.19
  -2   3  -2   80.56    3.12
  -3   3  -2  952.04   20.09
  -3   3  -2  968.82   22.42
  -4   3  -2    9.72    2.32
  -4   3  -2   10.77    1.80
  -5   3  -2  616.73   16.46
  -5   3  -2  628.36   14.35
  -6   3  -2   -2.12    1.42
  -6   3  -2   -1.46    2.13
  -7   3  -2  686.31   16.22
  -7   3  -2  678.21   19.04
  -8   3  -2 1012.44   27.45
  -8   3  -2 1054.70   23.41
  -9   3  -2   -0.47    2.48
  -9   3  -2   -4.04    3.50
 -10   3  -2   35.97    3.99
 -10   3  -2   41.16    5.81
 -11   3  -2    4.48    3.04
 -11   3  -2    3.87    4.30
 -12   3  -2   50.49    5.08
 -13   3  -2  118.50    7.29
 -14   3  -2  104.37    7.32
 -14  -2   2   18.43    6.08
 -13  -2   2   57.93    7.89
 -12  -2   2    4.47    4.61
 -11  -2   2   42.43    6.31
 -10  -2   2  199.33   10.24
  -9  -2   2  413.15   14.96
  -8  -2   2    7.45    3.45
  -7  -2   2  705.79   19.90
  -6  -2   2    7.49    2.47
  -5  -2   2  307.11   10.02
  -4  -2   2 1006.17   24.40
  -3  -2   2   -0.86    1.30
  -2  -2   2  683.24   15.95
   2   2  -2  662.02   12.68
   2   2  -2  640.33   13.69
   1   2  -2 2611.66   46.53
   1   2  -2 2548.30   50.28
  -1  -2   2 2600.50   56.85
   0   2  -2 3900.23   76.21
  -1   2  -2 1140.88   22.43
  -1   2  -2 1088.08   25.29
  -2   2  -2  225.52    5.72
  -2   2  -2  222.48    6.36
  -3   2  -2  111.73    3.67
  -3   2  -2  105.43    4.25
  -4   2  -2  184.76    6.41
  -4   2  -2  183.33    5.36
  -5   2  -2  589.38   16.00
  -5   2  -2  611.82   13.73
  -6   2  -2  261.02    7.50
  -6   2  -2  262.90    9.40
  -7   2  -2   22.94    3.69
  -7   2  -2   26.34    2.64
  -8   2  -2  267.93   10.65
  -8   2  -2  268.00    8.39
  -9   2  -2  886.93   20.79
  -9   2  -2  893.82   25.35
 -10   2  -2   51.53    4.40
 -10   2  -2   53.10    5.96
 -11   2  -2  673.05   22.05
 -11   2  -2  679.38   17.58
 -12   2  -2   -4.84    4.66
 -12   2  -2   -2.84    2.90
 -13   2  -2  125.60    7.27
 -13   2  -2  121.92   10.81
 -14  -1   2  101.68   10.48
 -13  -1   2  194.74   12.30
 -12  -1   2    5.76    5.21
 -11  -1   2    4.24    4.50
 -10  -1   2   66.96    6.64
  -9  -1   2   89.02    7.16
  -8  -1   2   32.88    4.52
  -7  -1   2 1018.09   26.71
  -6  -1   2    3.18    2.45
  -5  -1   2  289.81    9.62
  -4  -1   2  117.49    4.98
  -3  -1   2 3151.25   69.68
   1   1  -2    9.41    0.83
   1   1  -2   10.42    0.91
  -1  -1   2    9.54    1.08
   0   1  -2 2987.14   64.07
   0   1  -2 2728.83   56.03
  -1   1  -2 2255.95   43.72
  -1   1  -2 2231.69   49.84
  -2   1  -2   24.65    1.74
  -2   1  -2   25.62    2.35
  -3   1  -2  424.72    9.42
  -3   1  -2  421.57   11.12
  -4   1  -2 1058.69   21.99
  -4   1  -2 1072.37   25.51
  -5   1  -2  319.29    9.96
  -5   1  -2  293.41    7.77
  -6   1  -2  711.54   16.09
  -6   1  -2  737.06   19.47
  -7   1  -2  215.76    6.76
  -7   1  -2  228.60    9.04
  -8   1  -2  122.09    7.37
  -8   1  -2  101.94    4.90
  -9   1  -2  813.96   23.62
  -9   1  -2  815.25   19.13
 -10   1  -2   77.67    7.17
 -10   1  -2   75.74    4.92
 -11   1  -2  358.73   11.07
 -11   1  -2  355.11   14.79
 -12   1  -2   -5.60    4.34
 -12   1  -2   -1.78    2.93
 -13   1  -2  497.53   20.04
 -13   1  -2  473.79   14.44
 -14   1  -2    8.64    6.49
 -14   0   2   -1.16    5.62
 -13   0   2  688.82   18.46
 -13   0   2  719.45   24.77
 -12   0   2  527.76   19.95
 -12   0   2  528.40   14.56
 -11   0   2   37.41    5.95
 -10   0   2  257.31   11.88
  -9   0   2   42.26    5.29
  -8   0   2  809.41   22.73
  -7   0   2 1245.06   31.49
  -6   0   2   15.69    2.76
  -5   0   2  456.16   13.15
  -4   0   2  844.19   20.81
  -3   0   2 1426.61   32.71
  -2   0   2 1338.99   30.29
  -1   0   2 1073.67   23.46
   1   0  -2 1002.79   20.53
   0   0  -2  452.59    9.23
   0   0  -2  439.64   10.70
  -1   0  -2   21.90    1.87
  -1   0  -2   21.73    1.21
  -2   0  -2 1725.46   34.12
  -2   0  -2 1762.43   39.09
  -3   0  -2  845.59   17.40
  -3   0  -2  858.60   20.49
  -4   0  -2  477.52   12.92
  -4   0  -2  476.73   10.53
  -5   0  -2  930.60   19.71
  -5   0  -2  956.93   23.63
  -6   0  -2   41.54    2.87
  -6   0  -2   41.78    4.28
  -7   0  -2  212.72    8.76
  -7   0  -2  199.08    6.23
  -8   0  -2    2.20    1.83
  -8   0  -2    5.02    3.27
  -9   0  -2  607.34   14.81
  -9   0  -2  594.68   18.96
 -10   0  -2  270.04    8.87
 -10   0  -2  282.58   12.31
 -11   0  -2   51.72    6.60
 -11   0  -2   52.76    4.71
 -12   0  -2   51.26    7.09
 -12   0  -2   50.20    4.87
 -13   0  -2  373.29   16.97
 -14   0  -2   38.39    8.04
 -14   1   2    4.46    5.99
 -13   1   2   25.17    4.38
 -13   1   2   22.52    6.44
 -12   1   2  230.44   12.51
 -12   1   2  222.11    8.82
 -11   1   2   66.66    6.94
 -10   1   2  569.90   19.01
  -9   1   2  456.91   15.76
  -8   1   2    2.40    3.26
  -7   1   2  559.06   16.61
  -6   1   2  119.53    6.25
  -5   1   2  579.03   15.74
  -4   1   2  460.35   12.51
  -3   1   2   59.21    3.41
  -1   1   2 1599.25   35.59
   0  -1  -2 9998.95  196.76
  -1  -1  -2   27.05    1.13
  -1  -1  -2   26.04    2.27
  -2  -1  -2   11.46    1.74
  -2  -1  -2   12.78    0.94
  -3  -1  -2  138.00    3.65
  -3  -1  -2  137.99    5.29
  -4  -1  -2  661.37   13.63
  -4  -1  -2  638.06   16.68
  -5  -1  -2   34.58    2.33
  -5  -1  -2   37.61    3.53
  -6  -1  -2  757.31   16.19
  -6  -1  -2  739.95   20.09
  -7  -1  -2    4.49    2.91
  -7  -1  -2    0.81    1.40
  -8  -1  -2  438.10   10.99
  -8  -1  -2  438.72   14.68
  -9  -1  -2   18.28    4.40
  -9  -1  -2   24.40    2.79
 -10  -1  -2   -5.14    3.47
 -10  -1  -2   -1.59    2.10
 -11  -1  -2  152.75    6.67
 -11  -1  -2  153.68    9.89
 -12  -1  -2    4.43    4.95
 -13  -1  -2   -3.17    5.25
 -14  -1  -2  193.12   13.34
 -14   2   2    2.87    6.07
 -14   2   2   12.61    4.37
 -13   2   2   81.97    8.61
 -13   2   2   91.81    6.61
 -12   2   2    0.38    3.02
 -12   2   2    2.01    4.72
 -11   2   2  127.88    6.60
 -11   2   2  133.53    9.06
 -10   2   2  140.23    8.87
  -9   2   2  217.30   10.22
  -8   2   2  973.06   26.32
  -7   2   2  207.33    8.75
  -6   2   2  115.75    5.85
  -5   2   2  743.16   19.19
  -4   2   2 1197.79   28.32
  -3   2   2  778.17   18.82
  -2   2   2 4446.20   97.02
   0  -2  -2 3437.12   75.55
   1   2   2  114.03    2.66
  -1  -2  -2  113.72    4.02
  -2  -2  -2  220.50    4.74
  -2  -2  -2  224.47    7.07
  -3  -2  -2  347.67    9.67
  -3  -2  -2  309.66    6.91
  -4  -2  -2  998.12   24.33
  -5  -2  -2   57.97    4.27
  -7  -2  -2 2006.38   39.58
  -7  -2  -2 1937.43   47.17
  -8  -2  -2   94.86    4.21
  -8  -2  -2   91.80    6.68
  -9  -2  -2  149.72    5.62
  -9  -2  -2  152.38    8.76
 -10  -2  -2   23.23    5.11
 -10  -2  -2   20.23    2.89
 -11  -2  -2    2.48    4.27
 -11  -2  -2    0.39    2.40
 -12  -2  -2   84.49    8.41
 -13  -2  -2   83.96    9.17
 -14  -2  -2   -2.88    5.56
 -14   3   2   81.99    6.93
 -14   3   2   74.19    9.21
 -13   3   2   24.29    6.45
 -13   3   2   32.06    4.71
 -12   3   2   12.37    5.17
 -12   3   2   10.49    3.71
 -11   3   2   59.44    5.11
 -11   3   2   56.14    6.61
 -10   3   2   79.10    5.32
 -10   3   2   86.61    7.36
  -9   3   2    5.67    3.66
  -8   3   2    1.86    3.20
  -7   3   2 3456.79   78.73
  -6   3   2  703.22   18.97
  -5   3   2   12.13    2.33
  -4   3   2  140.04    5.54
  -3   3   2 1124.90   26.21
  -2   3   2  475.53   11.87
   1  -3  -2  189.34    5.93
   0  -3  -2  187.43    5.40
   1   3   2  594.71   11.25
  -1  -3  -2  582.45   14.42
  -2  -3  -2 1246.48   29.02
  -3  -3  -2  412.38   11.47
   3   3   2  406.61    8.59
  -4  -3  -2   86.80    4.75
  -5  -3  -2    2.09    2.18
  -6  -3  -2    2.29    2.66
  -7  -3  -2   98.94    6.15
  -8  -3  -2  343.99   12.57
  -9  -3  -2   20.79    4.59
  -9  -3  -2   24.76    2.57
 -10  -3  -2   41.46    5.84
 -10  -3  -2   41.91    3.75
 -11  -3  -2   10.87    5.07
 -12  -3  -2    6.93    5.36
 -13  -3  -2   23.85    6.77
 -14  -3  -2   81.25    9.22
 -14   4   2    0.22    4.04
 -13   4   2   -2.22    3.43
 -12   4   2  329.52   11.50
 -12   4   2  315.82   14.68
 -11   4   2    7.03    3.33
 -11   4   2    4.63    4.79
 -10   4   2   83.43    5.48
 -10   4   2   85.13    7.33
  -9   4   2    3.02    2.58
  -9   4   2   -3.55    3.34
  -8   4   2    0.81    3.21
  -8   4   2    1.20    2.24
  -7   4   2 1332.89   33.18
  -6   4   2  332.29   10.87
  -5   4   2   16.41    2.48
  -4   4   2   59.67    3.91
  -3   4   2   45.40    3.04
  -2   4   2    4.23    1.26
   1  -4  -2 2827.47   62.43
   0   4   2   29.03    1.88
   0  -4  -2   32.21    3.12
   1   4   2 3046.33   55.07
  -1  -4  -2 3015.49   67.72
   1   4   2 3124.81   59.73
  -2  -4  -2  304.10    9.26
   2   4   2  302.19    6.64
  -3  -4  -2   12.01    2.12
   3   4   2   12.15    1.33
   4   4   2    2.75    1.21
  -4  -4  -2    2.41    1.86
  -5  -4  -2  893.01   22.98
  -6  -4  -2  403.56   12.99
  -7  -4  -2   57.70    5.41
  -8  -4  -2  247.21   10.39
  -9  -4  -2  130.39    8.05
 -10  -4  -2   50.20    6.24
 -11  -4  -2   94.30    8.11
 -12  -4  -2  525.09   19.99
 -13  -4  -2   -3.40    5.49
 -14  -4  -2   22.07    7.22
 -13   5   2   -4.23    3.45
 -12   5   2   72.11    6.20
 -11   5   2    3.24    3.29
 -11   5   2   -1.14    4.37
 -10   5   2  179.72   10.06
 -10   5   2  178.80    7.81
  -9   5   2   29.62    3.79
  -9   5   2   30.76    4.60
  -8   5   2   -0.56    3.43
  -8   5   2    2.92    2.57
  -7   5   2  544.25   15.99
  -7   5   2  510.27   13.44
  -6   5   2  128.44    6.34
  -6   5   2  139.80    5.49
  -5   5   2 1540.69   31.25
  -5   5   2 1456.64   35.24
  -4   5   2 1492.18   34.65
  -3   5   2 1184.59   27.52
  -2   5   2  701.17   15.02
  -2   5   2  707.82   16.78
  -1   5   2   50.28    2.34
   1  -5  -2   57.33    3.01
   0   5   2   69.60    2.49
   0  -5  -2   69.89    3.37
   1   5   2    5.54    0.97
   1   5   2    6.41    1.18
  -1  -5  -2    3.64    1.96
   2   5   2   99.32    3.24
   2   5   2  101.81    2.60
  -2  -5  -2   97.20    4.82
  -3  -5  -2   18.37    2.53
   3   5   2   17.40    1.52
  -4  -5  -2   -0.33    1.79
   4   5   2   -0.03    1.07
  -5  -5  -2  695.17   18.78
  -6  -5  -2 1247.84   31.37
  -7  -5  -2   43.81    4.68
  -8  -5  -2  412.53   14.50
  -9  -5  -2   37.11    5.08
 -10  -5  -2  448.16   16.72
 -11  -5  -2  111.89    9.13
 -12  -5  -2   15.49    5.97
 -13  -5  -2  340.06   16.74
 -14  -5  -2   14.09    6.90
 -13   6   2   44.39    5.76
 -12   6   2   16.08    4.35
 -11   6   2   22.36    4.23
 -10   6   2    9.78    3.46
  -9   6   2   28.99    3.85
  -9   6   2   20.72    4.53
  -8   6   2  164.51    6.98
  -8   6   2  157.85    8.43
  -7   6   2  306.40    9.51
  -7   6   2  313.64   11.24
  -6   6   2  487.19   12.57
  -6   6   2  484.57   14.28
  -5   6   2  914.64   19.95
  -5   6   2  865.50   22.19
  -4   6   2    7.44    1.80
  -4   6   2   10.63    2.02
  -3   6   2   73.00    3.48
  -3   6   2   69.03    3.71
  -2   6   2  517.77   11.80
  -2   6   2  523.28   12.91
  -1   6   2  492.81   10.97
   0   6   2  223.50    5.53
   0  -6  -2  223.84    6.58
  -1  -6  -2  283.13    8.40
   1   6   2  284.28    6.67
   1   6   2  298.45    6.58
  -2  -6  -2  960.44   23.76
   2   6   2  968.31   18.94
   2   6   2 1021.65   19.61
   3   6   2   15.06    1.10
   3   6   2   13.55    1.48
  -3  -6  -2   15.09    2.58
  -4  -6  -2  936.46   23.59
   4   6   2  927.14   18.46
  -5  -6  -2   16.15    3.21
   5   6   2   17.36    1.78
  -6  -6  -2   37.27    4.21
  -7  -6  -2   32.89    4.30
  -8  -6  -2  137.24    7.82
  -9  -6  -2  212.32   10.65
 -10  -6  -2   35.50    5.85
 -11  -6  -2  420.56   16.98
 -12  -6  -2  234.44   13.32
 -13  -6  -2   21.65    6.76
 -14  -6  -2   32.15    7.97
 -12   7   2  385.68   13.45
 -11   7   2  441.10   14.06
 -10   7   2  108.11    6.66
  -9   7   2   30.21    4.06
  -8   7   2   10.49    3.11
  -7   7   2  198.86    7.61
  -7   7   2  196.91    8.73
  -6   7   2  396.59   10.96
  -6   7   2  376.40   12.09
  -5   7   2    4.63    2.01
  -5   7   2    4.14    2.03
  -4   7   2  355.93    9.49
  -4   7   2  352.18   10.19
  -3   7   2   66.45    3.49
  -3   7   2   64.15    3.51
  -2   7   2    2.82    1.44
  -2   7   2   -0.30    1.20
  -1   7   2   12.27    1.60
   1  -7  -2    6.04    1.73
   0  -7  -2 1118.05   26.72
   0   7   2 1202.97   23.63
   1   7   2   23.62    1.88
  -1  -7  -2   25.85    2.51
   1   7   2   21.43    1.88
   2   7   2  259.27    6.46
  -2  -7  -2  261.03    8.57
   2   7   2  263.03    6.04
  -3  -7  -2  709.97   18.62
   3   7   2  707.73   14.39
   4   7   2  964.08   19.10
  -4  -7  -2  923.58   24.25
   4   7   2  971.88   19.04
   5   7   2   16.76    1.95
  -5  -7  -2   13.68    3.17
   6   7   2 1003.81   20.31
  -6  -7  -2  971.74   26.15
  -7  -7  -2   82.09    6.31
  -8  -7  -2    2.77    3.46
  -9  -7  -2  282.45   12.25
 -10  -7  -2   11.51    4.77
 -11  -7  -2  957.71   29.41
 -12  -7  -2  310.19   14.98
 -13  -7  -2  155.98   11.98
 -14  -7  -2   90.69   10.35
 -12   8   2   22.93    5.04
 -11   8   2  359.73   12.72
 -10   8   2   34.91    4.76
  -9   8   2  316.79   10.98
  -8   8   2   53.81    4.77
  -7   8   2    7.22    2.99
  -6   8   2   37.30    3.85
  -6   8   2   26.63    3.28
  -5   8   2  591.35   16.08
  -5   8   2  611.99   14.94
  -4   8   2  756.66   18.87
  -4   8   2  757.18   17.49
  -3   8   2  980.65   23.20
  -3   8   2  981.89   21.41
  -2   8   2   24.63    2.04
  -2   8   2   25.98    2.31
   1  -8  -2  295.15    8.41
  -1   8   2  296.73    7.68
   0   8   2  532.77   11.98
   0  -8  -2  535.17   13.49
  -1  -8  -2 1274.05   29.87
   1   8   2 1268.17   24.81
   1   8   2 1307.15   26.00
   2   8   2  709.70   14.75
  -2  -8  -2  717.81   18.42
   2   8   2  693.51   14.65
   3   8   2  478.95   10.70
  -3  -8  -2  477.80   14.08
   3   8   2  490.95   10.32
  -4  -8  -2   15.19    3.11
   4   8   2   15.91    1.20
   4   8   2   12.53    1.77
   5   8   2   13.23    1.75
  -5  -8  -2    8.09    2.98
  -6  -8  -2  507.85   15.84
   7   8   2  302.80    8.59
  -7  -8  -2  329.92   12.30
  -8  -8  -2  252.30   11.38
  -9  -8  -2   -4.28    3.74
 -10  -8  -2  190.14   11.15
 -11  -8  -2 1452.40   40.53
 -12  -8  -2  235.06   13.07
 -13  -8  -2    1.00    5.04
 -14  -8  -2   -8.88    5.91
 -11   9   2    1.93    4.20
 -10   9   2   42.69    5.22
  -9   9   2  475.76   14.48
  -8   9   2   51.31    4.93
  -7   9   2 1030.10   24.27
  -6   9   2  258.53    8.86
  -5   9   2  223.10    7.73
  -4   9   2  177.41    6.46
  -2   9   2   72.98    3.53
  -2   9   2   81.23    3.96
  -1   9   2 3590.52   70.60
   0   9   2    1.04    1.33
   0  -9  -2   -4.77    1.50
   1   9   2 1720.96   32.40
  -1  -9  -2 1657.86   38.72
   1   9   2 1700.61   34.01
   2   9   2 1604.79   31.94
   2   9   2 1608.07   30.69
  -2  -9  -2 1576.83   37.54
  -3  -9  -2   12.53    3.03
   3   9   2   14.34    1.40
   3   9   2   11.15    1.70
  -4  -9  -2   11.00    2.98
   4   9   2    9.01    1.75
   4   9   2    9.61    1.18
   5   9   2  690.34   15.22
   5   9   2  720.42   14.49
  -5  -9  -2  695.03   19.86
   6   9   2  530.77   12.47
  -6  -9  -2  549.72   16.84
  -7  -9  -2  593.83   18.71
   7   9   2  612.48   14.09
  -8  -9  -2  201.85   10.30
  -9  -9  -2  282.19   12.82
 -10  -9  -2   15.04    5.35
 -11  -9  -2   10.45    4.92
 -12  -9  -2   94.56    9.65
 -13  -9  -2  462.82   19.76
 -14  -9  -2   99.22   10.94
 -11  10   2  114.76    7.91
 -10  10   2  107.11    7.26
  -9  10   2   -4.15    3.21
  -8  10   2  128.85    7.09
  -7  10   2  459.38   13.47
  -6  10   2   11.79    3.12
  -5  10   2  439.45   12.30
  -4  10   2  202.33    7.23
  -3  10   2  969.60   21.71
  -2  10   2  254.95    7.69
  -1  10   2   81.38    3.96
   0  10   2   54.82    3.33
   0 -10  -2   67.89    3.56
   1  10   2   50.29    3.19
   1  10   2   54.73    3.08
  -1 -10  -2   50.05    3.83
   2  10   2  316.49    8.14
   2  10   2  307.95    7.67
  -2 -10  -2  301.16    9.92
   3  10   2  661.54   14.48
  -3 -10  -2  649.11   18.21
   3  10   2  680.82   14.28
  -4 -10  -2   49.70    4.74
   4  10   2   50.30    3.35
   4  10   2   50.99    2.44
   5  10   2    0.69    1.44
  -5 -10  -2    2.79    2.86
   6  10   2   -0.36    1.72
  -6 -10  -2    3.11    3.29
  -7 -10  -2   99.12    7.34
   7  10   2   87.32    4.66
   8  10   2   99.68    5.08
  -8 -10  -2   95.91    7.84
  -9 -10  -2   17.31    4.65
 -10 -10  -2   71.70    7.66
 -11 -10  -2  815.30   26.58
 -12 -10  -2   89.73    9.27
 -13 -10  -2  134.20   11.63
 -14 -10  -2   34.00    8.25
 -10  11   2    9.48    4.35
  -9  11   2   -5.95    3.14
  -8  11   2   40.34    4.65
  -7  11   2   79.47    5.66
  -6  11   2    0.55    2.61
  -5  11   2  160.13    7.01
  -4  11   2   25.57    3.32
  -3  11   2   50.74    4.14
  -2  11   2 1373.25   29.40
  -1  11   2  268.17    7.95
   0  11   2  324.23    8.76
   1  11   2   47.85    3.05
   1  11   2   46.18    3.36
  -1 -11  -2   55.91    3.78
  -2 -11  -2  312.60   10.15
   2  11   2  323.25    8.60
   2  11   2  322.44    8.15
   3  11   2   45.20    3.27
   3  11   2   40.76    2.67
  -3 -11  -2   44.58    4.28
   4  11   2   32.91    2.77
   4  11   2   33.33    2.29
  -4 -11  -2   24.89    3.88
  -5 -11  -2  401.44   13.60
   5  11   2  370.77    9.81
   6  11   2  556.18   13.34
  -6 -11  -2  558.66   17.73
   7  11   2    2.83    2.08
  -7 -11  -2   -0.14    3.74
   8  11   2  278.23    8.77
  -8 -11  -2  286.61   12.69
  -9 -11  -2  291.54   13.36
 -10 -11  -2  141.50   10.07
 -11 -11  -2  165.97   10.96
 -12 -11  -2   16.56    6.40
 -13 -11  -2    9.94    6.79
 -14 -11  -2   80.91   10.65
 -10  12   2   89.66    7.36
  -9  12   2    2.39    3.47
  -8  12   2   24.67    4.28
  -7  12   2   19.03    3.79
  -6  12   2  165.83    7.57
  -5  12   2  161.43    7.17
  -4  12   2   35.31    3.85
  -3  12   2   93.96    5.21
  -2  12   2  865.79   20.03
  -1  12   2  597.78   14.55
   0  12   2   75.01    4.13
   1  12   2  119.47    4.77
   1  12   2  131.59    5.34
   2  12   2   40.22    2.96
   2  12   2   34.91    2.91
  -2 -12  -2   38.78    3.55
   3  12   2  180.73    6.28
  -3 -12  -2  194.32    8.19
   3  12   2  199.45    5.81
  -4 -12  -2  202.58    9.04
   4  12   2  213.61    6.91
   5  12   2   80.03    4.41
  -5 -12  -2   86.26    6.77
  -6 -12  -2   65.69    6.40
   6  12   2   59.07    3.91
  -7 -12  -2  918.46   26.48
   7  12   2  908.09   20.18
   8  12   2  280.96    9.02
  -8 -12  -2  298.32   13.20
   9  12   2  317.27    9.93
  -9 -12  -2  304.45   14.03
 -10 -12  -2  399.61   16.94
 -11 -12  -2    5.68    5.71
 -12 -12  -2    7.26    6.19
 -13 -12  -2   -2.81    6.22
 -14 -12  -2   43.27    9.19
  -9  13   2    7.82    4.29
  -8  13   2   21.30    4.42
  -7  13   2   -0.24    3.28
  -6  13   2   90.85    6.20
  -5  13   2   91.44    5.87
  -4  13   2   99.56    5.81
  -3  13   2   89.90    5.26
  -2  13   2  457.18   12.44
  -1  13   2  682.71   16.50
   0  13   2  230.46    7.44
   1  13   2  674.60   16.08
   1  13   2  728.75   16.25
   2  13   2 1281.71   26.54
   2  13   2 1307.17   27.26
   3  13   2  349.22    9.80
   4  13   2   46.22    3.59
  -4 -13  -2   48.12    4.94
   5  13   2   75.74    4.55
  -5 -13  -2   84.66    6.95
  -6 -13  -2  121.98    8.21
   6  13   2  128.20    5.79
   7  13   2  403.22   11.23
  -7 -13  -2  410.22   15.65
  -8 -13  -2  972.33   28.72
   9  13   2  219.89    8.15
  -9 -13  -2  226.37   12.21
 -10 -13  -2  626.92   22.51
 -11 -13  -2   98.88    9.96
 -12 -13  -2   26.84    7.14
 -13 -13  -2   85.43   10.36
  -8  14   2  164.40    8.82
  -7  14   2    8.49    3.78
  -6  14   2   70.56    5.81
  -5  14   2   74.11    5.75
  -4  14   2    0.33    2.90
  -3  14   2 1562.25   34.30
  -2  14   2    4.23    2.64
  -1  14   2  206.94    7.55
   0  14   2  183.62    6.78
   1  14   2  272.86    8.17
   1  14   2  262.70    8.52
   2  14   2   38.52    3.62
   2  14   2   40.60    3.43
   3  14   2   19.07    2.97
   4  14   2    1.82    2.18
   5  14   2   44.64    3.69
   6  14   2    5.38    2.58
  -6 -14  -2    6.53    4.30
   7  14   2  116.71    5.86
  -7 -14  -2  123.26    9.14
  -8 -14  -2  150.75    9.86
   8  14   2  135.32    6.34
  -9 -14  -2   23.03    5.95
   9  14   2   25.06    3.57
  10  14   2   39.00    4.25
 -10 -14  -2   44.76    7.18
 -11 -14  -2  389.57   18.13
 -12 -14  -2  121.64   11.41
 -13 -14  -2   21.24    7.92
  -8  15   2   53.12    6.22
  -7  15   2   11.99    4.16
  -6  15   2   -0.06    3.31
  -5  15   2   19.20    3.94
  -4  15   2   50.10    4.89
  -3  15   2  602.14   16.20
  -2  15   2    7.73    2.98
  -1  15   2   64.50    4.65
   0  15   2   43.96    3.75
   1  15   2  131.45    6.24
   1  15   2  145.34    6.03
   2  15   2   16.33    3.13
   3  15   2  192.20    7.19
   4  15   2   18.28    3.08
   5  15   2    2.26    2.41
   6  15   2  133.76    6.02
   7  15   2   -1.74    2.34
   8  15   2   11.54    3.11
  -8 -15  -2   17.85    5.29
   9  15   2    8.20    2.97
  -9 -15  -2    9.86    5.09
 -10 -15  -2    9.72    5.64
  10  15   2    6.00    3.10
 -11 -15  -2   40.34    7.72
 -12 -15  -2   50.65    8.72
 -13 -15  -2   -1.60    6.90
  -7  16   2    5.87    4.11
  -6  16   2   87.62    6.82
  -5  16   2    2.78    3.64
  -4  16   2    4.87    3.31
  -3  16   2   96.12    6.23
  -2  16   2   -2.82    2.59
  -1  16   2  555.95   14.80
   0  16   2   29.31    3.79
   0  16   2   27.96    3.39
   1  16   2  111.51    6.00
   2  16   2  267.46    9.13
   3  16   2  480.38   13.13
   4  16   2   24.66    3.57
   5  16   2   17.93    3.05
   6  16   2   75.39    5.13
   7  16   2   54.86    4.62
   8  16   2   53.09    4.48
   9  16   2  111.43    6.29
 -10 -16  -2   59.98    8.19
  10  16   2   67.37    5.45
 -11 -16  -2  114.26   10.97
 -12 -16  -2   46.84    8.70
 -13 -16  -2    6.12    7.92
  -6  17   2  383.63   13.74
  -5  17   2    4.60    3.66
  -4  17   2  117.45    7.08
  -3  17   2  145.32    7.50
  -2  17   2  295.49   10.18
  -1  17   2   44.04    4.22
   0  17   2   46.34    4.56
   1  17   2   -2.39    2.69
   2  17   2   17.60    3.55
   3  17   2   -2.14    2.68
   4  17   2   36.77    4.08
   5  17   2   10.20    3.18
   6  17   2   48.04    4.48
   7  17   2   32.77    4.12
   8  17   2   77.27    5.57
   9  17   2  206.98    8.69
  10  17   2  242.91    9.67
  11  17   2   -1.24    3.43
  -6  18   2    3.55    4.24
  -5  18   2    8.18    4.14
  -4  18   2   15.27    4.15
  -3  18   2   80.86    6.17
  -2  18   2    1.92    3.04
   0  18   2    5.32    3.04
   1  18   2   31.59    4.23
   2  18   2  130.28    6.59
   3  18   2  361.30   11.47
   4  18   2   16.26    3.64
   5  18   2  157.16    7.48
   6  18   2   24.00    3.66
   7  18   2   30.88    4.19
   8  18   2   79.85    5.94
   9  18   2   -0.21    3.21
  10  18   2  118.96    7.11
  11  18   2    9.16    3.94
  -5  19   2   -1.61    3.73
  -4  19   2   36.11    5.08
  -3  19   2   19.48    4.25
  -2  19   2    4.78    3.29
  -1  19   2   28.92    4.53
   0  19   2    1.46    3.50
   1  19   2  241.25    9.49
   2  19   2  602.66   16.45
   3  19   2  263.57    9.89
   4  19   2    3.95    3.36
   5  19   2   38.19    4.72
   6  19   2    6.82    3.60
   7  19   2   -5.18    3.01
   8  19   2   -0.77    3.22
   9  19   2   20.48    4.11
  10  19   2   38.86    5.07
  -4  20   2   67.75    6.33
  -1  20   2  114.07    7.44
   0  20   2   -3.07    3.43
   1  20   2   96.03    6.64
   2  20   2   66.32    5.68
   3  20   2   31.94    4.49
   4  20   2  208.90    9.04
   5  20   2    7.45    3.68
   6  20   2  130.43    7.50
   7  20   2  149.25    8.08
   8  20   2   52.05    5.52
   9  20   2   65.58    6.07
   0  21   2   66.98    6.23
   1  21   2   49.08    5.61
   2  21   2   39.04    5.19
   3  21   2  153.25    8.05
   4  21   2   44.22    5.22
   5  21   2   46.13    5.46
   6  21   2   -8.09    3.34
   7  21   2  256.61   10.72
   7  20  -3   12.50    4.54
   6  20  -3  135.61    7.91
   5  20  -3   22.89    4.65
   4  20  -3  122.83    7.78
   3  20  -3   95.84    6.88
   2  20  -3  303.68   11.68
   1  20  -3   30.90    5.09
   0  20  -3  248.75   10.52
   8  19  -3  268.33   10.68
   7  19  -3    1.83    3.50
   6  19  -3    8.32    3.90
   5  19  -3  462.50   14.23
   4  19  -3   71.69    6.02
   3  19  -3   10.51    3.81
   2  19  -3   40.55    5.01
   1  19  -3  313.91   11.41
   0  19  -3  222.33    9.67
  -1  19  -3   10.01    3.80
  -1  19  -3   11.79    4.44
  -2  19  -3   97.40    6.84
  -3  19  -3   13.37    4.16
  10  18  -3    4.53    3.70
   9  18  -3   25.71    4.39
   8  18  -3   33.38    4.65
   7  18  -3   18.78    4.06
   6  18  -3  224.41    9.38
   5  18  -3  145.48    7.44
   4  18  -3   14.09    3.68
   3  18  -3  118.66    6.76
   2  18  -3  374.15   12.09
   1  18  -3   58.16    5.32
   0  18  -3   22.98    3.97
   0  18  -3   22.79    4.25
  -1  18  -3   29.99    4.40
  -1  18  -3   19.47    4.32
  -2  18  -3  288.31   10.92
  -3  18  -3  115.58    7.32
  -4  18  -3   92.70    7.28
  10  17  -3    5.99    3.48
   9  17  -3  194.97    8.68
   8  17  -3   39.63    4.79
   7  17  -3    6.59    3.30
   6  17  -3   17.50    3.67
   5  17  -3   13.17    3.48
   4  17  -3   75.19    5.47
   3  17  -3   40.27    4.39
   2  17  -3   24.00    4.10
   1  17  -3  205.90    8.53
   1  17  -3  213.99    8.66
   0  17  -3   19.92    3.59
   0  17  -3   14.77    3.78
  -1  17  -3  101.13    6.56
  -1  17  -3   99.99    6.32
  -2  17  -3    2.08    3.13
  -3  17  -3   25.47    4.34
  -4  17  -3   16.99    4.25
  -5  17  -3  325.27   12.48
  10  16  -3  244.56    9.71
   9  16  -3   -3.52    2.79
   8  16  -3   54.20    4.85
   7  16  -3   -1.91    2.64
   6  16  -3   -3.31    2.64
   5  16  -3  452.25   13.01
   4  16  -3  239.18    8.81
   3  16  -3   58.69    4.81
   2  16  -3  127.74    6.62
   1  16  -3   29.95    4.03
   1  16  -3   34.32    3.89
   0  16  -3  221.35    8.70
   0  16  -3  238.25    8.87
  -1  16  -3   75.23    5.43
  -2  16  -3    6.32    3.31
  -3  16  -3  161.46    8.07
  -4  16  -3  132.03    7.44
  -5  16  -3   37.32    5.04
  -6  16  -3   -4.84    3.39
  10  15  -3   10.26    3.53
   9  15  -3  226.07    8.83
   8  15  -3   33.97    4.01
   7  15  -3   88.28    5.60
   6  15  -3   97.26    5.80
   5  15  -3  926.08   21.24
   4  15  -3   58.82    4.76
   3  15  -3  344.73   10.54
   2  15  -3  181.93    7.33
   2  15  -3  178.36    7.42
   1  15  -3  110.89    6.01
   1  15  -3  117.12    6.04
   0  15  -3   99.51    5.80
   0  15  -3  101.73    5.83
  -1  15  -3   28.09    3.78
  -2  15  -3    6.95    3.17
  -3  15  -3  111.56    6.54
  -4  15  -3   85.31    6.08
  -5  15  -3  277.90   10.77
  -6  15  -3  239.74   10.42
  -7  15  -3  224.65   10.52
 -13 -14   3  169.59   13.25
 -12 -14   3   29.78    7.28
 -11 -14   3  308.52   15.32
  10  14  -3   84.28    5.85
   9  14  -3   13.53    3.15
   8  14  -3   28.22    3.76
   7  14  -3    1.66    2.67
   6  14  -3  186.82    7.40
   5  14  -3   10.33    2.86
   4  14  -3  299.27    9.40
   3  14  -3  610.44   15.48
   3  14  -3  610.34   15.14
   2  14  -3   42.35    3.79
   2  14  -3   36.45    3.89
   1  14  -3  325.12    9.81
   1  14  -3  325.63   10.20
   0  14  -3   21.41    3.38
   0  14  -3   23.78    3.39
  -1  14  -3    1.93    2.56
  -2  14  -3   47.82    4.54
  -3  14  -3   12.43    3.46
  -4  14  -3   11.86    3.48
  -5  14  -3  121.70    7.09
  -6  14  -3   77.17    6.38
  -7  14  -3  706.17   20.16
  -8  14  -3  291.57   12.08
 -13 -13   3  245.40   15.11
 -12 -13   3    7.88    6.61
 -11 -13   3  420.01   18.18
 -10 -13   3    4.06    4.93
  -9 -13   3   56.24    6.66
   9  13  -3   42.93    4.18
   8  13  -3   59.97    4.65
  -8 -13   3   66.72    6.75
   7  13  -3  608.95   15.18
   6  13  -3   -2.95    2.15
   5  13  -3   13.25    2.83
   4  13  -3  468.21   12.45
   4  13  -3  481.20   12.39
   3  13  -3  241.99    8.03
   3  13  -3  241.45    8.08
   2  13  -3   19.71    2.90
   2  13  -3   17.89    3.05
   1  13  -3 1089.42   24.94
   1  13  -3 1130.73   23.81
   0  13  -3   66.11    4.68
  -1  13  -3   -0.61    2.34
  -2  13  -3   16.71    3.31
  -3  13  -3   -1.44    2.54
  -4  13  -3    2.89    2.91
  -5  13  -3   28.18    4.20
  -6  13  -3   12.33    3.78
  -7  13  -3   36.14    4.86
  -8  13  -3  133.72    8.16
 -13 -12   3  202.63   14.28
 -12 -12   3   -7.25    5.29
 -11 -12   3  234.90   12.99
 -10 -12   3    7.14    4.92
   9  12  -3   28.52    3.59
  -9 -12   3   16.23    5.30
  -8 -12   3  518.90   17.54
   8  12  -3  510.55   13.50
   7  12  -3   12.74    2.75
  -7 -12   3   13.46    4.28
  -6 -12   3   42.90    4.98
   6  12  -3   49.10    4.02
   5  12  -3  382.50   10.46
   4  12  -3   22.27    2.78
   4  12  -3   23.70    2.92
   3  12  -3   -0.70    2.08
   3  12  -3    0.23    1.83
   2  12  -3  147.66    5.92
   2  12  -3  137.27    5.83
   1  12  -3   17.22    2.69
   1  12  -3   14.76    2.76
   0  12  -3   69.25    4.39
  -1  12  -3   40.22    3.80
  -2  12  -3   -1.70    2.26
  -3  12  -3   21.87    3.50
  -4  12  -3  160.11    7.22
  -5  12  -3   62.20    5.24
  -6  12  -3   42.27    4.68
  -7  12  -3   38.23    4.83
  -8  12  -3   45.14    5.32
  -9  12  -3    9.79    4.51
 -13 -11   3   17.59    6.89
 -12 -11   3   43.22    7.38
 -11 -11   3   -2.94    4.54
 -10 -11   3    5.69    4.71
  -9 -11   3  142.94    9.49
   8  11  -3   17.30    2.90
  -8 -11   3   17.26    4.55
   7  11  -3   14.68    2.67
  -7 -11   3   17.31    4.07
   6  11  -3  277.79    8.49
  -6 -11   3  284.62   10.81
  -5 -11   3  253.06    9.74
   5  11  -3  246.65    7.75
   5  11  -3  259.54    7.76
   4  11  -3  639.75   14.82
   4  11  -3  651.58   15.28
   3  11  -3   51.86    3.68
   3  11  -3   55.64    3.64
   2  11  -3  381.26   10.33
   2  11  -3  378.51    9.97
   1  11  -3  714.44   17.00
   1  11  -3  740.02   16.31
   0  11  -3    6.99    2.13
  -1  11  -3  158.24    6.30
  -2  11  -3   21.94    3.09
  -3  11  -3  143.08    6.41
  -4  11  -3  194.54    7.80
  -5  11  -3  127.59    6.67
  -6  11  -3    9.58    3.41
  -7  11  -3  279.75   10.54
  -8  11  -3   31.93    4.78
  -9  11  -3  145.89    8.34
 -10  11  -3    1.43    4.26
 -13 -10   3  192.42   12.99
 -12 -10   3   -0.18    4.90
 -11 -10   3    6.24    5.05
 -10 -10   3   25.55    5.65
  -9 -10   3  263.50   12.17
  -8 -10   3  100.09    7.49
   8  10  -3  112.87    5.35
   7  10  -3   23.94    2.93
  -7 -10   3   20.53    4.42
   6  10  -3   20.90    2.67
  -6 -10   3   24.15    3.99
   6  10  -3   26.26    2.57
   5  10  -3   51.00    3.48
   5  10  -3   57.32    3.68
  -5 -10   3   56.42    4.88
  -4 -10   3   26.97    3.30
   4  10  -3   34.88    3.03
   4  10  -3   31.57    2.71
  -3 -10   3  214.46    7.55
   3  10  -3  215.50    6.73
   3  10  -3  209.89    6.54
   2  10  -3   72.36    3.97
   2  10  -3   72.55    3.93
   1  10  -3  345.22    9.43
   1  10  -3  343.13    9.06
   0  10  -3 1297.05   27.80
  -1  10  -3  318.93    9.23
  -2  10  -3   92.76    4.86
  -3  10  -3   93.44    5.21
  -4  10  -3   83.83    5.29
  -5  10  -3   76.98    5.36
  -6  10  -3    3.95    2.83
  -7  10  -3  105.59    6.51
  -8  10  -3   -0.18    3.13
  -9  10  -3  131.46    7.72
 -10  10  -3   53.77    6.13
 -14  -9   3  101.84   10.81
 -13  -9   3   -2.04    5.59
 -12  -9   3  154.98   11.18
 -11  -9   3  224.40   12.42
 -10  -9   3   19.84    5.23
  -9  -9   3  103.14    8.06
  -8  -9   3  382.71   14.27
  -7  -9   3   92.79    6.78
   7   9  -3   89.84    4.57
  -6  -9   3    2.15    3.05
   6   9  -3    3.65    1.68
   6   9  -3    5.69    1.97
  -5  -9   3  606.66   17.36
   5   9  -3  644.31   14.12
   5   9  -3  616.47   14.38
  -4  -9   3 1471.42   35.51
   4   9  -3 1520.95   31.09
   4   9  -3 1496.25   29.28
  -3  -9   3   50.70    3.74
   3   9  -3   50.54    3.22
   3   9  -3   40.09    3.00
   2   9  -3   48.15    3.28
   2   9  -3   43.18    3.16
  -2  -9   3   51.94    3.45
   1   9  -3 1109.57   22.19
   1   9  -3 1085.43   23.60
   0   9  -3  125.07    4.94
  -1   9  -3 1069.04   23.38
  -2   9  -3  231.41    7.54
  -3   9  -3  167.96    6.49
  -4   9  -3   94.25    5.29
  -5   9  -3  843.53   20.44
  -6   9  -3   39.21    4.18
  -7   9  -3  295.77   10.39
  -8   9  -3   -3.82    2.75
  -9   9  -3   -2.89    3.11
 -10   9  -3   68.63    6.26
 -11   9  -3  163.68    9.10
 -14  -8   3   74.83    9.63
 -13  -8   3    1.22    5.58
 -12  -8   3    2.98    5.37
 -11  -8   3   -6.90    4.09
 -10  -8   3  208.30   11.33
  -9  -8   3   85.38    7.63
  -8  -8   3  381.47   14.26
   7   8  -3   14.45    2.34
  -7  -8   3   16.10    3.76
  -6  -8   3   34.90    4.08
   6   8  -3   33.86    2.76
   6   8  -3   31.17    2.79
   5   8  -3  666.52   14.96
   5   8  -3  708.38   15.60
  -5  -8   3  699.36   18.98
   4   8  -3   21.72    2.17
   4   8  -3   25.65    2.23
  -4  -8   3   21.50    2.98
  -3  -8   3   57.76    3.91
   3   8  -3   59.55    3.23
   3   8  -3   60.18    3.22
   2   8  -3  632.33   13.75
  -2  -8   3  645.93   15.83
   2   8  -3  650.29   14.67
  -1  -8   3  627.73   15.14
   1   8  -3  647.78   13.77
   1   8  -3  641.44   14.66
   0   8  -3 1072.92   23.01
  -1   8  -3  612.81   14.42
  -2   8  -3  132.13    5.26
  -3   8  -3 1036.50   23.11
  -4   8  -3   82.95    4.78
  -5   8  -3  319.09    9.93
  -6   8  -3  181.41    7.47
  -7   8  -3   48.94    4.48
  -8   8  -3   36.72    4.34
  -9   8  -3  140.59    7.47
 -10   8  -3   18.01    4.25
 -11   8  -3    2.75    3.88
 -14  -7   3    6.08    6.45
 -13  -7   3   72.24    8.81
 -12  -7   3  422.83   17.53
 -11  -7   3  644.26   22.29
 -10  -7   3   23.22    5.42
  -9  -7   3  509.82   17.68
  -8  -7   3   19.23    4.49
  -7  -7   3   73.67    5.99
  -6  -7   3  270.93   10.10
   6   7  -3  260.34    7.37
  -5  -7   3  899.50   23.26
   5   7  -3  891.83   18.46
   5   7  -3  904.33   19.32
  -4  -7   3    0.75    1.92
   4   7  -3    3.25    1.48
   4   7  -3    2.33    1.31
   3   7  -3 1915.27   38.76
  -3  -7   3 1949.06   43.99
   3   7  -3 1913.08   36.17
  -2  -7   3  417.45   10.77
   2   7  -3  392.51    9.31
   2   7  -3  403.36    9.88
   1   7  -3 1264.68   26.50
   1   7  -3 1282.22   24.66
  -1  -7   3 1274.40   28.69
   0   7  -3  566.78   13.13
  -1   7  -3  125.71    4.77
  -2   7  -3  123.26    5.01
  -3   7  -3  312.40    8.95
  -4   7  -3  338.99    9.74
  -5   7  -3  193.88    7.18
  -6   7  -3   19.57    3.17
  -7   7  -3   51.10    4.48
  -8   7  -3  200.57    8.18
  -9   7  -3   92.38    6.15
 -10   7  -3   50.01    5.14
 -11   7  -3  234.63   10.12
 -12   7  -3   21.23    4.67
 -14  -6   3   14.63    6.77
 -13  -6   3  215.23   13.19
 -12  -6   3  240.66   13.20
 -11  -6   3   72.32    7.50
 -10  -6   3  194.56   10.79
  -9  -6   3  182.92    9.58
  -8  -6   3  373.74   13.74
  -7  -6   3  376.74   13.08
  -6  -6   3   50.84    4.81
   6   6  -3   52.93    3.22
   5   6  -3  741.97   15.41
   5   6  -3  723.93   16.02
  -5  -6   3  734.52   19.60
   4   6  -3    1.14    1.29
   4   6  -3    2.29    1.30
  -4  -6   3    2.51    2.20
  -3  -6   3   34.89    3.36
   3   6  -3   38.42    2.47
   3   6  -3   33.25    2.51
   2   6  -3    6.58    1.38
  -2  -6   3    8.68    1.72
   2   6  -3    9.61    1.50
  -1  -6   3 4567.79   98.85
   1   6  -3 4486.08   81.67
   1   6  -3 4542.92   88.18
   0   6  -3 2842.10   56.15
  -1   6  -3  113.69    4.38
  -2   6  -3 1721.00   35.29
  -3   6  -3  150.66    5.10
  -3   6  -3  150.78    5.55
  -4   6  -3  104.36    4.76
  -4   6  -3  103.02    4.68
  -5   6  -3    9.82    2.40
  -6   6  -3   14.01    2.80
  -7   6  -3  612.03   15.87
  -8   6  -3  312.53   10.31
  -9   6  -3  746.06   19.25
 -10   6  -3  115.14    6.69
 -11   6  -3   22.02    4.20
 -12   6  -3    1.06    3.65
 -13   6  -3  179.37    9.45
 -14  -5   3   23.34    7.19
 -13  -5   3   60.83    8.17
 -12  -5   3  111.95    9.69
 -11  -5   3  152.13   10.11
 -10  -5   3   11.88    4.57
  -9  -5   3  869.78   25.41
  -8  -5   3  124.06    7.66
  -7  -5   3   59.31    5.41
  -6  -5   3  368.55   12.21
   5   5  -3  323.68    7.87
  -5  -5   3  309.13   10.33
   4   5  -3  863.49   18.32
  -4  -5   3  864.35   21.67
   4   5  -3  863.96   17.23
   3   5  -3   24.14    2.00
   3   5  -3   23.84    2.16
  -3  -5   3   31.90    3.17
   2   5  -3 1055.11   21.66
  -2  -5   3 1049.98   24.28
   2   5  -3 1033.68   20.00
   1   5  -3 4838.23   86.60
  -1  -5   3 4794.94  105.11
   1   5  -3 4845.41   93.57
   0   5  -3  153.21    4.74
  -1   5  -3   85.89    3.58
  -2   5  -3 1656.32   33.33
  -2   5  -3 1602.38   36.39
  -3   5  -3   82.68    4.01
  -3   5  -3   84.59    4.01
  -4   5  -3 1150.31   26.85
  -4   5  -3 1126.76   24.52
  -5   5  -3  354.09   10.82
  -5   5  -3  369.67   10.02
  -6   5  -3    1.29    1.96
  -6   5  -3    0.69    2.34
  -7   5  -3  103.71    5.40
  -7   5  -3  104.66    6.40
  -8   5  -3   52.43    4.50
 -10   5  -3   63.94    5.28
 -11   5  -3    5.04    3.27
 -12   5  -3   20.10    4.33
 -13   5  -3   51.42    5.72
 -14  -4   3   62.21    8.73
 -13  -4   3  100.99    9.24
 -12  -4   3  167.43   11.25
 -11  -4   3   12.02    4.88
 -10  -4   3  791.57   24.18
  -9  -4   3  457.36   16.17
  -8  -4   3  510.64   16.58
  -7  -4   3  169.89    7.93
  -6  -4   3  143.20    7.09
  -5  -4   3 2202.98   50.89
   4   4  -3  211.21    5.47
   4   4  -3  205.77    5.71
  -4  -4   3  206.49    7.44
   3   4  -3   12.03    1.42
  -3  -4   3   12.77    2.02
   3   4  -3   13.42    1.34
  -2  -4   3  694.24   16.39
   2   4  -3  677.26   13.34
   2   4  -3  667.88   14.48
  -1  -4   3   94.42    3.28
   1   4  -3   95.22    2.98
   1   4  -3   96.93    3.43
   0  -4   3  678.45   15.79
   0   4  -3  709.89   14.87
  -1   4  -3   17.74    1.64
  -2   4  -3 2560.48   57.01
  -2   4  -3 2601.37   51.12
  -3   4  -3   37.66    2.92
  -3   4  -3   33.48    3.13
  -4   4  -3 2123.43   43.66
  -4   4  -3 2199.53   48.92
  -5   4  -3 1225.23   29.36
  -5   4  -3 1218.36   26.14
  -6   4  -3  320.00   10.37
  -6   4  -3  294.59    8.84
  -7   4  -3    2.79    2.93
  -7   4  -3    8.32    2.47
  -8   4  -3   67.88    6.22
  -8   4  -3   64.61    4.72
  -9   4  -3  118.34    6.13
  -9   4  -3  130.21    8.24
 -10   4  -3  198.61    8.12
 -11   4  -3   83.78    5.84
 -12   4  -3    2.69    3.34
 -13   4  -3   13.82    4.04
 -14   4  -3   89.70    7.23
 -14  -3   3   20.07    6.64
 -13  -3   3   59.10    8.17
 -12  -3   3   53.27    6.87
 -11  -3   3   95.21    8.37
 -10  -3   3   15.05    4.61
  -9  -3   3  113.88    8.00
  -8  -3   3   70.08    6.13
  -7  -3   3    1.14    2.67
  -6  -3   3  171.40    7.60
  -5  -3   3 2458.31   56.36
  -4  -3   3 1003.76   24.51
   3   3  -3 1851.94   36.83
  -3  -3   3 1858.17   42.13
   3   3  -3 1858.08   34.11
   2   3  -3   -0.33    0.78
  -2  -3   3    0.14    1.19
   2   3  -3   -1.39    0.89
   1   3  -3  929.14   18.84
   1   3  -3  910.43   17.17
  -1  -3   3  901.86   20.87
   0   3  -3   86.17    3.22
   0  -3   3   85.31    2.71
  -1   3  -3 1541.00   34.16
  -1   3  -3 1509.29   30.54
  -2   3  -3 1004.68   21.07
  -2   3  -3 1024.06   23.36
  -3   3  -3  422.77   11.04
  -3   3  -3  412.53    9.95
  -4   3  -3  895.52   22.00
  -4   3  -3  915.68   19.58
  -5   3  -3  438.95   12.33
  -5   3  -3  416.97   10.65
  -6   3  -3  654.70   17.60
  -6   3  -3  622.42   14.99
  -7   3  -3 1163.11   29.17
  -7   3  -3 1120.59   24.99
  -8   3  -3   98.01    7.00
  -8   3  -3   78.12    4.83
  -9   3  -3    5.38    2.73
  -9   3  -3    9.10    4.17
 -10   3  -3  233.90   11.21
 -10   3  -3  238.20    8.71
 -11   3  -3   36.28    6.06
 -11   3  -3   44.60    4.53
 -12   3  -3  121.29    6.90
 -13   3  -3   14.68    4.02
 -14  -2   3   14.61    6.64
 -13  -2   3   67.71    8.37
 -12  -2   3   26.88    6.02
 -11  -2   3    0.89    3.69
 -10  -2   3   98.03    7.53
  -9  -2   3   29.08    4.57
  -8  -2   3  505.82   16.39
  -7  -2   3  201.88    8.90
  -6  -2   3  342.66   11.40
  -5  -2   3  218.40    8.12
  -4  -2   3  156.19    5.96
   3   2  -3 3603.33   70.16
  -3  -2   3 3618.78   79.77
   2   2  -3   84.15    3.22
   2   2  -3   94.22    2.74
  -2  -2   3   93.54    3.84
   1   2  -3 7423.08  143.05
  -1  -2   3 7099.45  159.21
   1   2  -3 7280.18  131.40
   0   2  -3 1576.33   36.45
   0   2  -3 1693.30   32.39
  -1   2  -3  753.86   15.87
  -1   2  -3  769.03   17.66
  -2   2  -3 1033.43   24.36
  -2   2  -3 1080.14   21.68
  -3   2  -3    1.54    1.51
  -3   2  -3   -0.57    1.02
  -4   2  -3  147.09    5.82
  -4   2  -3  139.21    4.69
  -5   2  -3    1.13    1.45
  -5   2  -3    1.49    2.04
  -6   2  -3    1.26    1.56
  -6   2  -3   -0.40    2.36
  -7   2  -3  100.24    4.67
  -7   2  -3   97.95    6.29
  -8   2  -3  173.46    6.62
  -8   2  -3  174.72    8.84
  -9   2  -3  862.17   20.45
  -9   2  -3  881.09   24.99
 -10   2  -3  508.13   14.28
 -10   2  -3  569.73   18.47
 -11   2  -3  127.34    6.60
 -11   2  -3  132.70    9.69
 -12   2  -3  153.11    7.61
 -12   2  -3  172.22   11.32
 -13   2  -3  143.11    7.64
 -14  -1   3    3.22    6.00
 -13  -1   3   73.30    8.54
 -12  -1   3   -0.37    4.56
 -11  -1   3   72.32    7.32
 -10  -1   3    5.08    4.08
  -9  -1   3   53.24    5.78
  -7  -1   3  146.61    7.51
  -6  -1   3 2464.54   57.00
  -5  -1   3  341.94   10.75
  -4  -1   3   85.67    4.42
  -3  -1   3  248.68    7.60
  -2  -1   3 1927.65   42.80
   2   1  -3 1901.62   37.64
  -1  -1   3 1173.98   26.22
   1   1  -3 1126.74   23.13
   1   1  -3 1178.74   21.19
   0   1  -3   19.19    1.57
   0   1  -3   16.59    1.61
  -1   1  -3 6585.62  151.27
  -1   1  -3 7233.82  134.84
  -2   1  -3 1681.04   33.24
  -2   1  -3 1673.89   37.89
  -3   1  -3  398.17   10.70
  -3   1  -3  388.24    8.99
  -4   1  -3  626.73   16.33
  -4   1  -3  640.90   13.89
  -5   1  -3   10.87    2.54
  -5   1  -3   13.10    1.82
  -6   1  -3    9.25    1.83
  -6   1  -3    6.77    2.58
  -7   1  -3  187.60    8.28
  -7   1  -3  192.68    6.29
  -8   1  -3  551.48   13.74
  -8   1  -3  563.75   17.30
  -9   1  -3  369.73   13.90
  -9   1  -3  384.50   10.81
 -10   1  -3  265.59   12.09
 -10   1  -3  269.54    8.98
 -11   1  -3    7.84    4.86
 -11   1  -3    6.16    2.99
 -12   1  -3  294.15   14.29
 -12   1  -3  301.61   10.42
 -13   1  -3   83.16    8.85
 -14   1  -3   -7.76    6.01
 -14   0   3  229.24   14.02
 -13   0   3   38.48    4.69
 -13   0   3   42.51    7.29
 -12   0   3  251.64   13.08
 -11   0   3   75.09    7.39
 -10   0   3  329.29   13.57
  -9   0   3  544.41   17.84
  -8   0   3  353.64   12.88
  -7   0   3    2.84    2.85
  -6   0   3  268.07    9.52
  -5   0   3   39.29    3.52
  -4   0   3  251.51    8.17
  -3   0   3 1619.49   36.99
  -2   0   3   71.76    3.71
  -1   0   3 2339.90   49.87
   1   0  -3 2172.80   43.92
   0   0  -3  157.21    4.68
   0   0  -3  148.40    3.73
  -1   0  -3 1819.95   36.22
  -1   0  -3 1889.11   41.44
  -2   0  -3   62.12    2.69
  -2   0  -3   69.12    4.38
  -3   0  -3  343.39    9.72
  -3   0  -3  340.62    7.79
  -4   0  -3 1095.12   22.49
  -4   0  -3 1106.89   26.51
  -5   0  -3  118.74    4.15
  -5   0  -3  117.27    5.85
  -6   0  -3    9.57    2.80
  -6   0  -3   13.33    1.81
  -7   0  -3  252.20    7.24
  -7   0  -3  243.22    9.66
  -8   0  -3  631.72   15.00
  -8   0  -3  635.61   19.00
  -9   0  -3   66.70    6.61
  -9   0  -3   70.11    4.45
 -10   0  -3   50.09    6.00
 -10   0  -3   46.21    4.18
 -11   0  -3   32.70    3.83
 -11   0  -3   27.17    5.80
 -12   0  -3  860.50   27.64
 -12   0  -3  882.87   21.43
 -13   0  -3    2.99    5.49
 -14   0  -3  148.88   12.40
 -14   1   3   -4.65    5.57
 -13   1   3  196.47   12.54
 -13   1   3  218.52    9.11
 -12   1   3   55.38    7.17
 -11   1   3   77.19    7.74
 -10   1   3  150.36    9.28
  -9   1   3    7.64    3.98
  -8   1   3  167.53    8.54
  -7   1   3  262.31   10.14
  -6   1   3   15.88    3.02
  -5   1   3    4.09    2.18
  -4   1   3  643.05   16.64
  -3   1   3 1019.31   24.12
  -2   1   3 2471.36   54.81
   1  -1  -3   11.20    1.68
   0  -1  -3  114.63    3.99
   0  -1  -3  109.55    2.84
  -1  -1  -3 1147.42   26.26
  -1  -1  -3 1140.73   22.60
  -2  -1  -3 4597.07   99.87
  -2  -1  -3 4501.38   88.26
  -3  -1  -3 1309.45   30.15
  -3  -1  -3 1264.11   25.52
  -4  -1  -3  218.73    5.44
  -4  -1  -3  209.82    7.38
  -5  -1  -3   -0.88    2.31
  -5  -1  -3   -0.27    1.20
  -6  -1  -3  115.28    4.19
  -6  -1  -3  122.58    6.40
  -7  -1  -3   19.95    2.12
  -7  -1  -3   13.92    3.35
  -8  -1  -3   28.43    2.64
  -8  -1  -3   30.93    4.12
  -9  -1  -3  105.48    7.75
  -9  -1  -3  115.37    5.14
 -10  -1  -3  361.22   14.56
 -10  -1  -3  383.03   10.63
 -11  -1  -3   57.11    4.57
 -11  -1  -3   56.52    6.97
 -12  -1  -3  367.60   16.15
 -13  -1  -3  176.37   12.01
 -14  -1  -3   18.00    6.86
 -14   2   3   -0.53    5.69
 -14   2   3    1.65    3.84
 -13   2   3    1.00    5.03
 -13   2   3    3.02    3.38
 -12   2   3    0.32    4.45
 -12   2   3    1.59    3.07
 -11   2   3  171.96   10.30
 -10   2   3    0.47    3.68
  -9   2   3  345.46   13.31
  -8   2   3   -0.71    3.08
  -7   2   3  180.02    8.19
  -6   2   3    3.50    2.41
  -5   2   3  804.86   20.56
  -4   2   3 1609.12   37.32
  -3   2   3  129.48    4.94
  -2   2   3 1720.41   38.70
   1  -2  -3   37.67    3.01
   0  -2  -3   26.13    2.47
   1   2   3  154.78    3.35
  -1  -2  -3  153.38    3.45
  -1  -2  -3  153.15    5.27
  -2  -2  -3 3828.64   84.19
  -2  -2  -3 3799.91   74.28
  -3  -2  -3  200.04    4.77
  -3  -2  -3  217.41    7.39
  -4  -2  -3   16.36    2.61
  -5  -2  -3  654.65   17.68
  -5  -2  -3  647.72   13.80
  -6  -2  -3 1550.75   38.04
  -6  -2  -3 1595.75   31.69
  -7  -2  -3   29.97    2.68
  -7  -2  -3   39.57    4.40
  -8  -2  -3  251.64    7.18
  -8  -2  -3  245.43   10.48
  -9  -2  -3   36.40    4.84
  -9  -2  -3   32.37    2.97
 -10  -2  -3   68.36    4.40
 -10  -2  -3   79.56    7.46
 -11  -2  -3   53.00    6.73
 -12  -2  -3  278.95   14.14
 -13  -2  -3   25.95    6.72
 -14  -2  -3   -0.30    5.78
 -14   3   3   65.54    6.30
 -14   3   3   75.11    9.36
 -13   3   3   13.56    4.05
 -13   3   3   22.95    6.04
 -12   3   3   78.56    8.12
 -12   3   3   81.27    6.03
 -11   3   3   97.79    6.00
 -11   3   3  102.42    8.81
 -10   3   3  220.27   10.87
  -9   3   3  300.42   12.25
  -8   3   3   10.18    3.54
  -7   3   3   -0.77    2.54
  -6   3   3  706.49   19.09
  -5   3   3  162.70    6.64
  -4   3   3  349.41   10.28
  -3   3   3  421.45   11.28
  -2   3   3  686.17   16.56
   1  -3  -3  301.10    8.57
   0  -3  -3    4.63    1.64
  -1  -3  -3 1876.46   42.06
   1   3   3 1845.87   33.75
   2   3   3 2113.73   38.48
  -2  -3  -3 2133.49   48.14
  -3  -3  -3  845.29   17.12
  -3  -3  -3  883.67   21.51
  -4  -3  -3 2075.73   47.82
  -4  -3  -3 2079.98   40.47
  -5  -3  -3  617.50   12.89
  -5  -3  -3  610.29   16.93
  -6  -3  -3  937.57   24.34
  -6  -3  -3  915.00   19.12
  -7  -3  -3  158.85    5.05
  -7  -3  -3  172.54    8.27
  -8  -3  -3   13.83    1.94
  -8  -3  -3   15.49    3.88
  -9  -3  -3  446.47   15.83
  -9  -3  -3  471.56   11.48
 -10  -3  -3   22.77    2.76
 -10  -3  -3   16.58    4.97
 -11  -3  -3  111.62    9.12
 -12  -3  -3  246.59   13.44
 -13  -3  -3   14.18    6.44
 -14  -3  -3   38.03    7.99
 -14   4   3   69.17    6.61
 -13   4   3  127.74    7.78
 -13   4   3  134.35   10.64
 -12   4   3   35.42    6.20
 -12   4   3   21.88    4.29
 -11   4   3    2.84    3.04
 -11   4   3    3.62    4.46
 -10   4   3  178.40    9.79
 -10   4   3  174.52    7.45
  -9   4   3  556.46   18.03
  -8   4   3  608.90   18.35
  -7   4   3  549.85   16.41
  -6   4   3  245.52    8.98
  -5   4   3   40.90    3.69
  -4   4   3  163.55    6.19
  -3   4   3  555.77   14.18
  -2   4   3 8495.70  184.80
   1  -4  -3  104.63    4.47
   0  -4  -3  125.75    5.04
  -1  -4  -3    3.38    2.25
   1   4   3    9.87    1.19
   2   4   3 4701.02   84.59
  -2  -4  -3 4765.39  104.22
  -3  -4  -3    1.64    2.04
   3   4   3    2.01    0.96
  -4  -4  -3   98.85    2.63
  -4  -4  -3  102.69    5.45
  -5  -4  -3  795.04   21.07
  -5  -4  -3  789.47   16.08
  -6  -4  -3   26.37    2.04
  -6  -4  -3   28.87    3.77
  -7  -4  -3  902.55   24.56
  -7  -4  -3  897.81   18.81
  -8  -4  -3   54.70    3.12
  -8  -4  -3   56.78    5.53
  -9  -4  -3  200.61    6.37
  -9  -4  -3  221.98   10.66
 -10  -4  -3   38.72    5.97
 -11  -4  -3  580.91   20.63
 -12  -4  -3   77.24    8.55
 -13  -4  -3   34.48    6.99
 -14  -4  -3   -8.96    5.36
 -13   5   3   83.62    7.06
 -12   5   3    4.80    4.77
 -12   5   3    2.15    3.62
 -11   5   3  536.67   18.95
 -11   5   3  533.35   15.39
 -10   5   3  152.44    9.35
 -10   5   3  139.16    6.96
  -9   5   3   27.44    4.99
  -9   5   3   34.14    3.88
  -8   5   3   60.60    5.81
  -7   5   3   49.15    4.56
  -6   5   3  318.05   10.57
  -5   5   3  127.58    5.82
  -4   5   3  630.65   16.29
  -3   5   3  775.16   18.98
  -2   5   3  711.85   17.18
   1  -5  -3 1712.70   38.75
   0  -5  -3  937.72   22.13
  -1  -5  -3  279.96    8.63
   1   5   3  278.52    6.12
   1   5   3  284.61    6.37
  -2  -5  -3 1291.04   31.29
   2   5   3 1369.30   24.89
   3   5   3  272.35    6.38
  -3  -5  -3  272.41    9.05
  -4  -5  -3  811.71   21.12
  -5  -5  -3  172.44    7.43
  -6  -5  -3 1179.40   30.16
  -7  -5  -3    6.51    2.95
  -8  -5  -3  138.08    4.52
  -8  -5  -3  135.71    7.83
  -9  -5  -3  161.34    9.45
 -10  -5  -3  127.46    9.24
 -11  -5  -3    7.10    5.01
 -12  -5  -3   39.94    7.22
 -13  -5  -3  150.40   11.51
 -14  -5  -3   22.39    7.35
 -13   6   3   95.99    7.39
 -12   6   3   28.81    4.91
 -11   6   3   57.68    5.45
 -10   6   3    0.52    4.17
 -10   6   3    0.20    3.02
  -9   6   3   71.11    6.85
  -9   6   3   61.31    4.93
  -8   6   3    5.74    3.37
  -8   6   3    8.30    2.89
  -7   6   3    2.06    2.35
  -7   6   3   -1.01    2.59
  -6   6   3    8.37    2.32
  -6   6   3    5.76    2.65
  -5   6   3    0.28    1.85
  -4   6   3  175.81    6.49
  -3   6   3  583.82   14.89
  -2   6   3 2122.83   47.47
  -1   6   3   -0.58    0.94
   0  -6  -3 1317.84   30.34
   0   6   3 1308.92   26.17
   1   6   3    1.39    0.83
   1   6   3   -0.61    0.71
  -1  -6  -3    1.70    1.67
   2   6   3  135.03    3.92
   2   6   3  130.56    3.19
  -2  -6  -3  134.61    6.00
  -3  -6  -3  169.70    7.13
   3   6   3  181.83    4.91
  -4  -6  -3  166.97    7.42
   4   6   3  171.13    4.96
  -5  -6  -3  169.08    7.57
   5   6   3  182.54    5.37
  -6  -6  -3    4.60    2.60
  -7  -6  -3  109.23    6.76
  -8  -6  -3   11.14    3.98
  -9  -6  -3  666.54   21.31
 -10  -6  -3  152.36    9.60
 -11  -6  -3  516.09   19.39
 -12  -6  -3  357.72   16.36
 -13  -6  -3   26.86    6.55
 -14  -6  -3   21.39    7.62
 -12   7   3   14.62    4.53
 -11   7   3   24.59    4.58
 -10   7   3   44.69    4.86
  -9   7   3  203.10    8.33
  -9   7   3  205.51    9.91
  -8   7   3    2.65    2.63
  -8   7   3   -3.18    3.13
  -7   7   3  221.10    7.96
  -7   7   3  216.03    9.07
  -6   7   3  102.52    5.06
  -6   7   3   99.39    5.80
  -5   7   3   35.02    3.34
  -5   7   3   33.52    3.01
  -4   7   3    2.22    1.74
  -4   7   3    1.29    1.63
  -3   7   3  655.74   14.86
  -3   7   3  654.02   16.45
  -2   7   3 1310.41   26.82
  -2   7   3 1293.35   29.93
   1  -7  -3  797.14   19.01
  -1   7   3  765.03   16.53
   0  -7  -3   12.00    2.07
   0   7   3   15.10    1.48
   1   7   3  478.91   10.14
  -1  -7  -3  468.25   12.59
   1   7   3  468.97   10.14
  -2  -7  -3  309.46    9.78
   2   7   3  308.99    6.66
   2   7   3  288.49    7.06
   3   7   3 3135.71   60.03
   3   7   3 3088.39   56.36
  -3  -7  -3 3028.81   69.80
  -4  -7  -3    6.73    2.90
   4   7   3    2.24    1.21
  -5  -7  -3 1041.42   26.79
   5   7   3 1018.22   20.59
   6   7   3  207.84    6.33
  -6  -7  -3  213.83    9.27
  -7  -7  -3    2.23    2.99
  -8  -7  -3 1081.50   29.73
  -9  -7  -3  271.80   12.14
 -10  -7  -3   -2.42    3.68
 -11  -7  -3    0.24    4.22
 -12  -7  -3   23.87    6.68
 -13  -7  -3  215.21   13.63
 -14  -7  -3  152.98   12.81
 -12   8   3  229.11   10.40
 -11   8   3   32.93    5.09
 -10   8   3  145.50    7.82
  -9   8   3  123.37    6.85
  -7   8   3  757.01   18.72
  -7   8   3  758.30   21.03
  -6   8   3  567.96   14.65
  -6   8   3  575.46   16.36
  -5   8   3  196.26    6.92
  -5   8   3  192.48    7.35
  -4   8   3  441.23   11.33
  -4   8   3  437.81   12.26
  -3   8   3   81.02    4.07
  -3   8   3   78.19    3.97
  -2   8   3   48.24    3.01
  -2   8   3   50.64    3.11
  -1   8   3  168.79    5.30
   1  -8  -3  186.55    6.32
   0  -8  -3   -3.86    1.64
   0   8   3    1.08    1.25
  -1  -8  -3   63.43    4.02
   1   8   3   66.43    2.77
   1   8   3   60.95    2.90
  -2  -8  -3  209.34    7.83
   2   8   3  223.74    5.31
   2   8   3  209.67    5.76
   3   8   3 1046.47   20.29
   3   8   3  988.33   20.09
  -3  -8  -3 1010.79   25.82
   4   8   3  181.63    4.13
  -4  -8  -3  182.89    8.00
   4   8   3  176.36    5.42
   5   8   3  790.04   16.48
  -5  -8  -3  783.15   21.74
   6   8   3  561.34   12.72
  -6  -8  -3  547.08   17.10
  -7  -8  -3 1378.62   35.58
  -8  -8  -3 1097.82   30.29
  -9  -8  -3  202.78   10.89
 -10  -8  -3  338.53   14.72
 -11  -8  -3  407.14   17.14
 -12  -8  -3   83.72    9.14
 -13  -8  -3  111.79   10.29
 -14  -8  -3   38.01    8.32
 -11   9   3   99.45    7.33
 -10   9   3  290.97   11.12
  -9   9   3  150.68    7.76
  -8   9   3  687.84   18.18
  -7   9   3   18.32    3.51
  -6   9   3  100.89    5.62
  -5   9   3   63.04    4.57
  -5   9   3   57.22    4.22
  -4   9   3  545.79   14.58
  -4   9   3  543.09   13.61
  -3   9   3   19.97    2.27
  -3   9   3   16.88    2.38
  -2   9   3  242.18    7.20
  -2   9   3  222.20    6.85
   1  -9  -3  284.40    8.51
  -1   9   3  260.80    7.33
   0  -9  -3   13.87    2.43
   0   9   3   21.44    1.99
  -1  -9  -3 3987.28   88.07
   1   9   3 3982.79   77.28
   1   9   3 3957.91   72.49
   2   9   3  799.18   16.39
   2   9   3  778.26   16.32
  -2  -9  -3  786.66   20.40
   3   9   3  611.63   12.61
  -3  -9  -3  584.22   16.88
   3   9   3  608.09   13.12
   4   9   3   71.02    2.33
   4   9   3   64.27    3.41
  -4  -9  -3   69.40    5.81
  -5  -9  -3   11.98    3.35
   5   9   3    5.41    1.73
  -6  -9  -3  621.02   18.69
   6   9   3  595.05   13.73
  -7  -9  -3   20.84    3.97
   7   9   3   16.11    2.43
  -8  -9  -3  111.55    8.17
  -9  -9  -3  105.61    8.47
 -10  -9  -3  250.40   12.83
 -11  -9  -3   -2.34    5.07
 -12  -9  -3  185.59   12.60
 -13  -9  -3  140.14   11.18
 -14  -9  -3  170.28   13.44
 -11  10   3   51.54    6.20
 -10  10   3   92.97    6.92
  -9  10   3  131.03    7.46
  -8  10   3  441.87   13.48
  -7  10   3   11.42    3.21
  -6  10   3  380.46   11.49
  -5  10   3   30.59    3.48
  -4  10   3   56.40    4.02
  -3  10   3  173.95    6.25
  -2  10   3 4028.47   89.33
  -2  10   3 4112.54   80.24
  -1  10   3   27.67    2.49
   0 -10  -3  285.20    8.63
   0  10   3  272.20    7.45
  -1 -10  -3  115.65    5.35
   1  10   3  123.77    4.62
   1  10   3  121.14    4.20
  -2 -10  -3  206.16    7.92
   2  10   3  205.81    6.16
   2  10   3  198.00    5.48
   3  10   3  129.71    4.76
  -3 -10  -3  123.32    6.80
   3  10   3  131.04    3.93
  -4 -10  -3  184.88    8.45
   4  10   3  170.23    4.45
   4  10   3  161.80    5.44
  -5 -10  -3  178.95    8.77
   5  10   3  173.58    5.87
  -6 -10  -3  950.79   26.30
   6  10   3  944.48   20.03
  -7 -10  -3 3067.67   72.60
   8  10   3   40.37    3.60
  -8 -10  -3   43.99    5.58
  -9 -10  -3   73.19    7.28
 -10 -10  -3   13.00    5.19
 -11 -10  -3  111.55    9.91
 -12 -10  -3  114.13   10.55
 -13 -10  -3   28.60    7.62
 -14 -10  -3  186.23   14.35
 -10  11   3   48.35    5.80
  -9  11   3    3.53    3.55
  -8  11   3   12.68    3.74
  -7  11   3  128.30    6.81
  -6  11   3  228.54    8.65
  -5  11   3  103.75    5.69
  -4  11   3   63.96    4.47
  -3  11   3  177.09    6.59
  -2  11   3  184.97    6.42
  -1  11   3  737.38   16.82
   0  11   3  524.60   12.72
   0 -11  -3  560.58   14.41
  -1 -11  -3   10.85    2.43
   1  11   3   16.14    1.91
   1  11   3   14.27    1.95
   2  11   3   55.34    3.44
  -2 -11  -3   59.51    4.64
   2  11   3   50.71    2.92
   3  11   3  161.75    4.80
   3  11   3  176.89    5.75
  -3 -11  -3  160.20    7.88
   4  11   3  720.16   15.84
  -4 -11  -3  728.40   20.57
   5  11   3   29.41    2.77
  -5 -11  -3   24.18    4.39
   6  11   3   15.35    2.43
  -6 -11  -3   20.59    4.39
   7  11   3   -1.29    1.93
  -7 -11  -3    9.45    4.36
   8  11   3  547.33   13.75
  -8 -11  -3  560.34   19.20
  -9 -11  -3  185.27   11.03
 -10 -11  -3   12.29    5.53
 -11 -11  -3   -0.70    5.28
 -12 -11  -3  102.52   10.43
 -13 -11  -3   -0.35    6.39
 -14 -11  -3   -3.52    6.88
 -10  12   3   73.49    6.87
  -9  12   3   27.21    4.63
  -8  12   3   45.62    5.11
  -7  12   3   14.91    3.63
  -6  12   3   53.19    4.82
  -5  12   3   32.92    3.99
  -4  12   3  689.43   17.26
  -3  12   3  107.70    5.40
  -2  12   3  144.96    5.90
  -1  12   3  127.84    5.30
   0  12   3 1439.28   30.14
   1  12   3  538.92   12.67
   1  12   3  520.51   12.46
  -2 -12  -3  483.21   14.01
   2  12   3  484.49   11.82
   2  12   3  489.89   11.43
   3  12   3  722.82   15.54
   3  12   3  727.62   16.00
  -3 -12  -3  695.98   19.77
   4  12   3  187.88    6.41
  -4 -12  -3  179.15    8.75
   5  12   3  103.25    4.81
  -5 -12  -3  102.32    7.40
  -6 -12  -3  794.09   23.61
  -7 -12  -3  212.56   10.96
   7  12   3  205.78    7.30
  -8 -12  -3   18.55    5.23
   8  12   3   14.49    2.88
   9  12   3   46.71    4.15
  -9 -12  -3   56.15    7.07
 -10 -12  -3  218.68   12.65
 -11 -12  -3    9.73    6.10
 -12 -12  -3    7.51    6.35
 -13 -12  -3  -10.39    6.10
 -14 -12  -3   -0.04    7.07
  -9  13   3   77.01    6.63
  -8  13   3    4.60    3.59
  -7  13   3   -2.53    3.00
  -6  13   3   29.92    4.27
  -5  13   3  449.33   13.28
  -4  13   3   41.67    4.18
  -3  13   3  183.37    7.31
  -2  13   3  873.88   20.34
  -1  13   3   86.36    4.78
   0  13   3  111.82    5.12
   1  13   3  663.62   15.15
   1  13   3  641.53   15.04
   2  13   3  160.73    5.56
   2  13   3  176.32    6.34
   3  13   3  155.67    5.98
  -3 -13  -3  136.10    7.14
   4  13   3   56.58    4.00
  -4 -13  -3   68.66    6.23
   5  13   3   48.54    3.62
  -5 -13  -3   53.32    5.53
   6  13   3  652.80   15.62
  -6 -13  -3  663.11   20.81
  -7 -13  -3  604.29   20.39
   7  13   3  609.61   14.89
   8  13   3 1350.51   28.15
  -8 -13  -3 1303.10   36.53
  -9 -13  -3  193.96   11.93
   9  13   3  189.73    7.52
 -10 -13  -3    3.91    5.32
 -11 -13  -3  142.07   11.44
 -12 -13  -3   55.42    8.80
 -13 -13  -3   56.03    8.82
  -9  14   3   23.33    5.17
  -8  14   3   -0.73    3.66
  -7  14   3    4.12    3.57
  -6  14   3   99.56    6.52
  -5  14   3    1.86    3.12
  -4  14   3  215.02    8.44
  -3  14   3   -3.56    2.47
  -2  14   3  238.48    8.36
  -1  14   3   -0.78    2.25
   0  14   3 1239.06   26.91
   1  14   3    4.52    2.33
   1  14   3    9.05    2.17
   2  14   3  151.97    6.21
   3  14   3  680.83   16.04
   4  14   3  337.10    9.80
   5  14   3  450.36   11.94
  -5 -14  -3  449.89   15.77
  -6 -14  -3  232.07   11.35
   6  14   3  226.00    7.78
   7  14   3  258.12    8.59
  -7 -14  -3  272.97   12.57
   8  14   3   43.56    4.04
   9  14   3  230.93    8.46
  -9 -14  -3  229.04   12.59
 -10 -14  -3   54.18    7.58
 -11 -14  -3   61.19    8.51
 -12 -14  -3   -1.35    5.79
 -13 -14  -3  102.54   11.22
  -8  15   3   41.31    5.68
  -7  15   3   13.35    4.17
  -6  15   3  117.19    7.12
  -5  15   3   44.94    4.94
  -4  15   3  225.29    8.90
  -3  15   3   15.04    3.44
  -2  15   3   64.11    5.01
  -1  15   3   -0.88    2.32
   0  15   3  103.47    5.23
   1  15   3  368.62   10.07
   1  15   3  346.03   10.20
   2  15   3  142.12    6.23
   3  15   3   99.27    5.39
   4  15   3  108.85    5.60
   5  15   3  376.65   10.93
   6  15   3   30.95    3.59
   7  15   3    4.95    2.63
  -7 -15  -3   -0.48    4.14
   8  15   3   -0.99    2.41
  -8 -15  -3    4.14    4.65
  -9 -15  -3   -6.65    4.44
   9  15   3    1.33    2.62
  10  15   3  258.42    9.53
 -10 -15  -3  253.03   14.16
 -11 -15  -3  110.00   10.64
 -12 -15  -3   43.92    8.46
 -13 -15  -3  180.71   14.34
  -7  16   3   25.22    4.95
  -6  16   3   19.59    4.49
  -5  16   3  120.10    7.10
  -4  16   3   -0.09    3.12
  -3  16   3   -4.67    2.80
  -2  16   3  354.89   11.21
  -1  16   3   27.90    3.60
   0  16   3   56.29    4.40
   0  16   3   50.81    4.31
   1  16   3  242.10    8.52
   2  16   3 1185.20   25.66
   3  16   3   21.04    3.52
   4  16   3   23.46    3.42
   5  16   3   67.07    4.91
   6  16   3   90.66    5.47
   7  16   3  116.22    6.15
   8  16   3   -0.03    2.62
   9  16   3    3.26    2.80
  -9 -16  -3    8.74    5.46
  10  16   3   28.25    4.15
 -10 -16  -3   32.66    7.54
 -11 -16  -3  307.16   16.78
 -12 -16  -3  105.67   11.35
 -13 -16  -3    3.72    7.64
  -7  17   3   94.59    7.64
  -6  17   3    5.18    4.10
  -5  17   3   15.44    4.28
  -4  17   3   55.01    5.40
  -3  17   3   86.38    6.06
  -2  17   3    3.50    2.97
  -1  17   3   49.02    4.41
   0  17   3  167.95    7.22
   1  17   3   72.94    5.10
   2  17   3    4.34    2.84
   3  17   3  745.09   18.11
   4  17   3  654.64   16.56
   5  17   3    1.87    2.90
   6  17   3  385.69   11.71
   7  17   3   35.19    4.13
   8  17   3  290.14   10.09
   9  17   3    6.60    3.21
  10  17   3   35.46    4.45
 -12 -17  -3   47.03    8.91
  -6  18   3    9.01    4.42
  -5  18   3   61.59    6.15
  -4  18   3   64.74    5.81
  -3  18   3    8.22    3.51
  -2  18   3  128.51    6.97
   0  18   3  142.72    6.90
   1  18   3   97.97    5.84
   2  18   3   94.05    5.92
   3  18   3   62.49    5.24
   4  18   3   52.08    4.76
   5  18   3    2.05    2.70
   6  18   3  141.97    7.11
   7  18   3  224.82    9.04
   8  18   3   -4.37    2.81
   9  18   3    9.70    3.51
  10  18   3   40.33    4.84
  11  18   3  184.81    8.95
  -5  19   3   25.15    5.00
  -4  19   3   78.55    6.65
  -3  19   3    2.54    3.31
  -1  19   3   13.87    3.62
   0  19   3   24.51    3.92
   1  19   3   -0.41    3.06
   2  19   3   59.00    5.32
   3  19   3   26.71    4.29
   4  19   3  450.14   13.45
   5  19   3  165.29    7.88
   6  19   3    8.41    3.65
   7  19   3    1.77    3.25
   8  19   3    4.93    3.39
   9  19   3  414.95   13.35
  10  19   3   10.37    3.99
  -4  20   3   66.17    6.18
  -1  20   3   89.25    6.07
   0  20   3   21.89    4.07
   1  20   3    5.75    3.68
   2  20   3   14.04    3.96
   3  20   3    2.08    3.40
   4  20   3   38.73    4.78
   5  20   3  196.98    8.88
   6  20   3  336.00   11.77
   7  20   3  253.77   10.22
   8  20   3   25.48    4.51
   9  20   3    0.27    3.50
  -1  21   3  323.22   11.99
   0  21   3   -1.59    3.84
   1  21   3  114.56    7.44
   2  21   3   87.23    6.60
   3  21   3   -5.48    2.99
   4  21   3   23.22    4.46
   5  21   3   51.85    5.40
   6  21   3   94.14    6.88
   7  21   3    6.55    3.92
   2  22   3   67.10    6.24
   3  22   3   22.65    4.69
   4  22   3   33.52    5.11
   5  22   3  124.71    7.90
   6  20  -4  117.33    7.82
   5  20  -4   65.25    6.13
   4  20  -4   14.36    4.17
   3  20  -4   -3.79    3.44
   2  20  -4   78.02    6.52
   1  20  -4  161.42    8.81
   8  19  -4   -1.70    3.47
   7  19  -4  390.77   13.05
   6  19  -4  143.35    7.85
   5  19  -4  499.52   15.01
   4  19  -4   25.75    4.57
   3  19  -4  153.01    8.20
   2  19  -4  205.09    9.34
   1  19  -4  762.12   20.05
   0  19  -4   68.54    6.13
  -1  19  -4  119.29    7.30
  -1  19  -4  106.08    7.80
  -2  19  -4    0.42    4.25
  -2  19  -4    7.55    3.82
  -3  19  -4  146.21    8.53
   9  18  -4  342.01   12.20
   8  18  -4    1.66    3.31
   7  18  -4   -0.57    3.25
   6  18  -4   49.48    5.28
   5  18  -4  194.09    8.58
   4  18  -4    0.64    3.15
   3  18  -4   71.34    5.68
   2  18  -4   12.81    3.82
   1  18  -4   76.22    6.21
   0  18  -4  420.54   13.28
   0  18  -4  435.05   13.72
  -1  18  -4  235.04    9.88
  -1  18  -4  236.69    9.82
  -2  18  -4   10.61    3.90
  -3  18  -4  119.51    7.63
  -4  18  -4   34.60    5.17
  10  17  -4  154.63    8.00
   9  17  -4    3.31    3.21
   8  17  -4   37.73    4.49
   7  17  -4    2.68    3.07
   6  17  -4    1.72    2.95
   5  17  -4   72.01    5.49
   4  17  -4    0.21    2.80
   3  17  -4   14.32    3.62
   2  17  -4  326.52   10.96
   1  17  -4  348.00   11.52
   1  17  -4  339.09   11.29
   0  17  -4   57.76    5.26
   0  17  -4   62.33    5.41
  -1  17  -4   91.96    6.41
  -1  17  -4   82.95    6.07
  -2  17  -4   88.59    6.31
  -3  17  -4   31.28    4.62
  -4  17  -4  330.30   12.34
  -5  17  -4   35.16    5.47
  10  16  -4   21.28    4.08
   9  16  -4   37.11    4.47
   8  16  -4   94.52    6.08
   7  16  -4   90.04    6.04
   6  16  -4   -2.44    2.66
   5  16  -4   12.45    3.30
   4  16  -4  201.13    8.06
   3  16  -4  199.41    8.01
   2  16  -4  190.32    7.94
   2  16  -4  196.90    8.13
   1  16  -4   28.21    4.07
   1  16  -4   19.20    3.43
   0  16  -4    3.72    3.09
   0  16  -4    0.65    2.69
  -1  16  -4   26.45    4.09
  -2  16  -4   51.11    5.02
  -3  16  -4    1.66    3.11
  -4  16  -4   21.91    4.43
  -5  16  -4   24.39    4.59
  -6  16  -4   34.48    5.21
  10  15  -4  357.91   11.96
   9  15  -4   -0.59    2.96
   8  15  -4   41.26    4.26
   7  15  -4   64.24    5.08
   6  15  -4  991.28   22.59
   5  15  -4   72.88    5.22
   4  15  -4   12.20    3.14
   3  15  -4  393.34   11.47
   2  15  -4    5.32    2.63
   2  15  -4    6.89    3.05
   1  15  -4   74.78    5.31
   1  15  -4   80.75    5.38
   0  15  -4  140.07    6.87
   0  15  -4  144.92    6.81
  -1  15  -4  520.40   14.75
  -2  15  -4   -2.23    2.59
  -3  15  -4   76.16    5.76
  -4  15  -4   69.14    5.83
  -5  15  -4  238.63   10.12
  -6  15  -4   -2.34    3.57
 -13 -14   4   45.04    9.02
 -12 -14   4   -3.11    5.56
   9  14  -4   14.48    3.26
   8  14  -4    2.87    2.64
   7  14  -4   23.48    3.75
   6  14  -4   86.20    5.37
   5  14  -4   20.21    3.29
   4  14  -4  585.55   14.74
   3  14  -4  408.94   11.63
   3  14  -4  375.96   11.08
   2  14  -4  220.35    8.02
   2  14  -4  217.06    8.04
   1  14  -4   33.82    3.66
   1  14  -4   28.02    3.57
   0  14  -4    2.86    2.55
   0  14  -4    9.07    2.93
  -1  14  -4  169.66    7.28
  -2  14  -4    9.65    3.11
  -3  14  -4   12.92    3.45
  -4  14  -4   15.81    3.58
  -5  14  -4    7.11    3.48
  -6  14  -4    8.89    4.02
  -7  14  -4  751.48   21.17
 -13 -13   4   -5.46    6.66
 -12 -13   4   57.21    8.35
 -11 -13   4   -0.13    5.62
 -10 -13   4   21.13    5.98
  -9 -13   4    8.96    4.91
   9  13  -4   12.03    3.04
   8  13  -4  106.40    5.77
   7  13  -4    7.78    2.70
   6  13  -4    5.36    2.60
   5  13  -4  372.94   10.69
   4  13  -4  179.22    7.00
   4  13  -4  183.21    7.01
   3  13  -4   71.65    4.68
   3  13  -4   66.15    4.58
   2  13  -4   90.84    5.20
   2  13  -4   91.62    5.18
   1  13  -4  396.02   11.02
   1  13  -4  384.65   11.31
   0  13  -4  784.41   19.10
  -1  13  -4   21.40    3.27
  -2  13  -4   54.72    4.72
  -3  13  -4  204.11    8.21
  -4  13  -4  124.49    6.78
  -5  13  -4    9.59    3.48
  -6  13  -4   58.20    5.43
  -7  13  -4  439.86   14.50
  -8  13  -4  119.51    7.86
 -13 -12   4  154.89   12.33
 -12 -12   4    4.16    5.43
 -11 -12   4    5.65    5.17
 -10 -12   4    2.13    4.92
  -9 -12   4   53.80    6.38
   9  12  -4   48.95    4.43
  -8 -12   4   18.90    4.56
   8  12  -4   18.15    3.04
   7  12  -4    9.43    2.70
  -7 -12   4   12.28    3.89
   6  12  -4  165.00    6.52
   5  12  -4  166.74    6.42
   5  12  -4  151.41    6.22
   4  12  -4 1092.86   24.16
   4  12  -4 1071.53   22.96
   3  12  -4   12.73    2.61
   3  12  -4   11.85    2.64
   2  12  -4   18.88    2.89
   2  12  -4   17.80    2.85
   1  12  -4   68.90    4.51
   1  12  -4   75.71    4.79
   0  12  -4   86.36    5.03
  -1  12  -4  159.17    6.72
  -2  12  -4   13.69    3.00
  -3  12  -4  152.73    7.00
  -4  12  -4   -1.44    2.62
  -5  12  -4   41.05    4.47
  -6  12  -4    3.35    3.23
  -7  12  -4   99.08    6.74
  -8  12  -4   10.96    4.09
  -9  12  -4   10.52    4.52
 -13 -11   4  136.16   11.49
 -12 -11   4  177.82   11.98
 -11 -11   4   -0.32    4.71
 -10 -11   4  171.02   10.72
  -9 -11   4   -2.55    4.28
  -8 -11   4  292.05   12.41
   8  11  -4  297.27    9.22
   7  11  -4   24.61    3.04
  -6 -11   4   53.99    5.17
   6  11  -4   50.38    3.95
   5  11  -4  129.92    5.48
  -5 -11   4  120.63    6.76
   5  11  -4  126.49    5.39
   4  11  -4   11.66    2.36
   4  11  -4   12.49    2.32
   3  11  -4  162.32    6.16
   3  11  -4  165.13    5.97
   2  11  -4  151.68    5.95
   2  11  -4  156.74    5.90
   1  11  -4    8.42    2.35
   1  11  -4    8.52    2.33
   0  11  -4  151.58    6.22
  -1  11  -4  151.45    6.39
  -2  11  -4   31.83    3.48
  -3  11  -4    8.94    2.77
  -4  11  -4   96.84    5.81
  -5  11  -4   40.37    4.28
  -6  11  -4   64.62    5.36
  -7  11  -4  151.46    7.79
  -8  11  -4  464.30   14.87
  -9  11  -4   -0.41    3.53
 -13 -10   4   -1.22    5.55
 -12 -10   4   70.12    8.38
 -11 -10   4  124.56    9.78
 -10 -10   4   27.37    5.59
  -9 -10   4  202.67   10.71
  -8 -10   4   87.48    7.15
   8  10  -4   78.06    4.71
  -7 -10   4   58.58    5.82
   7  10  -4   55.68    3.97
   6  10  -4   61.46    3.98
   6  10  -4   66.07    3.97
  -6 -10   4   59.13    5.41
  -5 -10   4  102.22    6.11
   5  10  -4  110.09    4.84
   5  10  -4  109.76    5.00
   4  10  -4  790.22   17.11
  -4 -10   4  778.63   20.41
   4  10  -4  789.69   17.98
   3  10  -4  209.30    6.65
   3  10  -4  212.86    6.90
   2  10  -4   78.11    4.26
   2  10  -4   81.13    4.15
   1  10  -4  387.46   10.54
   1  10  -4  392.32    9.96
   0  10  -4   -0.73    1.66
  -1  10  -4  129.18    5.56
  -2  10  -4  203.09    7.33
  -3  10  -4  645.13   16.26
  -4  10  -4  117.31    6.13
  -5  10  -4   68.71    5.24
  -6  10  -4   21.19    3.73
  -7  10  -4    1.30    3.11
  -8  10  -4  595.86   17.29
  -9  10  -4   -3.69    3.50
 -10  10  -4   46.73    5.89
 -13  -9   4  137.71   11.52
 -12  -9   4   -3.52    4.78
 -11  -9   4   87.14    8.68
 -10  -9   4   23.12    5.56
  -9  -9   4   -3.30    3.86
  -8  -9   4  437.57   15.68
   7   9  -4    8.77    2.25
  -7  -9   4    6.38    3.84
   6   9  -4  207.18    6.74
  -6  -9   4  215.18    9.04
   6   9  -4  207.18    6.69
   5   9  -4   27.46    2.64
  -5  -9   4   27.28    3.62
   5   9  -4   28.81    2.62
   4   9  -4    3.05    1.61
   4   9  -4    0.07    1.48
  -4  -9   4    2.31    2.21
   3   9  -4 1089.99   23.81
  -3  -9   4 1119.15   26.48
   3   9  -4 1100.29   22.28
   2   9  -4   77.36    4.02
   2   9  -4   77.07    3.83
  -2  -9   4   72.19    3.71
   1   9  -4  132.65    5.25
   1   9  -4  124.63    4.82
   0   9  -4   64.67    3.83
  -1   9  -4  789.38   18.28
  -2   9  -4   56.75    3.94
  -4   9  -4   -0.03    2.11
  -5   9  -4  570.71   15.25
  -6   9  -4  507.34   14.42
  -7   9  -4   80.27    5.75
  -8   9  -4  123.17    7.06
  -9   9  -4    3.17    3.50
 -10   9  -4    1.70    3.90
 -11   9  -4   25.11    5.11
 -14  -8   4    9.56    6.66
 -13  -8   4  368.51   17.41
 -12  -8   4    8.83    5.38
 -11  -8   4    5.95    4.93
 -10  -8   4   59.67    6.56
  -9  -8   4  337.79   13.85
  -8  -8   4   32.14    5.01
   7   8  -4   69.61    4.03
  -7  -8   4   71.69    6.14
   6   8  -4  625.31   13.95
  -6  -8   4  604.70   17.84
   6   8  -4  607.41   14.34
   5   8  -4    4.24    1.66
   5   8  -4    1.68    1.57
  -5  -8   4   -1.76    2.37
   4   8  -4  440.86   10.52
  -4  -8   4  443.55   13.02
   4   8  -4  468.67   11.25
   3   8  -4   53.13    3.09
   3   8  -4   50.93    3.16
  -3  -8   4   49.81    3.75
   2   8  -4  224.41    6.43
  -2  -8   4  222.25    6.93
   2   8  -4  224.33    6.81
  -1  -8   4  230.12    6.22
   1   8  -4  220.33    6.88
   1   8  -4  218.49    6.36
   0   8  -4  802.79   18.10
  -2   8  -4  444.06   11.54
  -3   8  -4 1544.61   32.88
  -4   8  -4  567.18   14.55
  -5   8  -4   35.04    3.71
  -6   8  -4    0.60    2.59
  -7   8  -4   14.32    3.41
  -8   8  -4   87.28    5.99
  -9   8  -4   91.81    6.47
 -10   8  -4   76.34    6.36
 -11   8  -4  580.99   17.69
 -14  -7   4    1.07    6.07
 -13  -7   4   85.05    9.23
 -12  -7   4   72.80    8.41
 -11  -7   4   -3.12    3.90
 -10  -7   4  117.36    8.77
  -9  -7   4   19.88    4.69
  -8  -7   4  153.78    8.78
  -7  -7   4  572.86   17.59
   6   7  -4  295.23    8.06
  -6  -7   4  289.03   10.59
   6   7  -4  280.27    7.79
   5   7  -4 1570.86   32.68
   5   7  -4 1583.49   30.66
  -5  -7   4 1608.36   38.14
  -4  -7   4   50.38    4.26
   4   7  -4   50.04    3.10
   4   7  -4   53.39    3.03
   3   7  -4 1923.47   35.62
  -3  -7   4 1851.79   43.12
   3   7  -4 1891.14   38.31
   2   7  -4    1.70    1.38
  -2  -7   4    2.37    1.58
   2   7  -4    2.04    1.44
   1   7  -4 1530.42   31.38
  -1  -7   4 1503.45   33.90
   1   7  -4 1515.37   28.97
   0   7  -4   15.51    2.09
  -1   7  -4   38.16    3.10
  -2   7  -4   96.33    4.47
  -3   7  -4  962.28   21.53
  -4   7  -4 1041.23   23.38
  -5   7  -4    8.92    2.52
  -6   7  -4  157.71    6.89
  -7   7  -4   40.09    4.12
  -8   7  -4   54.85    4.83
  -9   7  -4   -0.49    2.88
 -10   7  -4  139.02    7.61
 -11   7  -4  121.16    7.59
 -12   7  -4   30.08    5.24
 -14  -6   4  643.39   24.62
 -13  -6   4  763.75   26.55
 -12  -6   4    5.56    4.69
 -11  -6   4    2.06    4.19
 -10  -6   4  348.28   14.52
  -9  -6   4   36.85    5.38
  -8  -6   4    5.03    3.64
  -7  -6   4   -0.44    2.48
  -6  -6   4  725.89   19.99
   6   6  -4  702.85   15.35
   5   6  -4   73.76    3.44
   5   6  -4   76.01    3.65
  -5  -6   4   75.10    5.08
   4   6  -4  759.93   15.68
  -4  -6   4  759.63   19.67
   4   6  -4  773.40   16.84
   3   6  -4  155.08    4.69
   3   6  -4  149.14    5.05
  -3  -6   4  162.14    5.99
   2   6  -4  395.74    9.92
   2   6  -4  419.27    9.20
  -2  -6   4  410.37   10.77
   1   6  -4  291.81    7.09
  -1  -6   4  295.89    7.72
   1   6  -4  293.19    7.84
   0   6  -4  195.96    6.00
  -1   6  -4  133.51    4.92
  -2   6  -4   44.21    3.16
  -3   6  -4    3.54    1.61
  -3   6  -4    1.68    1.78
  -4   6  -4   24.42    2.74
  -5   6  -4  403.64   11.17
  -6   6  -4  117.42    5.75
  -7   6  -4  150.32    6.75
  -8   6  -4  762.17   19.28
  -9   6  -4  184.43    8.05
 -10   6  -4   88.71    6.13
 -11   6  -4   49.44    5.31
 -12   6  -4  459.52   15.14
 -14  -5   4  163.36   12.51
 -13  -5   4   86.01    9.07
 -12  -5   4  468.84   18.84
 -11  -5   4  162.43   10.38
 -10  -5   4  126.71    8.91
  -9  -5   4   39.90    5.14
  -8  -5   4  209.65    9.89
  -7  -5   4   26.01    4.05
  -6  -5   4   49.60    4.48
   5   5  -4  314.89    8.20
   5   5  -4  319.86    7.82
  -5  -5   4  316.10   10.49
   4   5  -4 2127.11   39.65
   4   5  -4 2115.04   42.72
  -4  -5   4 2168.11   49.04
  -3  -5   4    1.83    1.74
   3   5  -4   -0.21    1.10
   3   5  -4    0.26    1.19
  -2  -5   4 1271.67   28.26
   2   5  -4 1200.39   25.26
   2   5  -4 1204.23   23.19
   1   5  -4  672.82   14.57
  -1  -5   4  656.36   15.44
   1   5  -4  642.21   13.17
   0  -5   4   68.55    2.44
   0   5  -4   76.92    3.46
  -1   5  -4   16.08    1.91
  -2   5  -4  269.80    7.62
  -2   5  -4  283.26    7.22
  -3   5  -4  514.92   12.47
  -3   5  -4  511.72   13.07
  -4   5  -4 1237.23   26.95
  -4   5  -4 1282.64   29.75
  -5   5  -4  590.56   14.69
  -5   5  -4  614.53   16.33
  -6   5  -4  156.81    6.42
  -6   5  -4  165.98    7.44
  -7   5  -4    6.14    2.58
  -8   5  -4 1007.10   23.63
  -9   5  -4  190.29    7.90
 -10   5  -4   27.68    4.01
 -11   5  -4   18.76    3.92
 -12   5  -4  164.80    8.56
 -13   5  -4   24.43    4.82
 -14  -4   4  242.17   14.11
 -13  -4   4  135.60   10.96
 -12  -4   4  488.50   19.16
 -11  -4   4   88.75    8.14
 -10  -4   4   74.25    7.37
  -9  -4   4    0.94    3.30
  -8  -4   4  234.08   10.44
  -7  -4   4   13.21    3.42
  -6  -4   4  387.94   12.46
  -5  -4   4   91.76    5.42
   4   4  -4 1264.94   26.10
  -4  -4   4 1275.60   30.27
   4   4  -4 1255.64   24.17
  -3  -4   4    8.50    1.90
   3   4  -4    5.86    1.15
   3   4  -4    5.27    1.32
   2   4  -4  949.30   18.28
   2   4  -4  958.63   20.03
  -2  -4   4  965.03   22.48
  -1  -4   4   25.66    1.99
   1   4  -4   26.18    2.16
   1   4  -4   27.09    1.85
   0   4  -4    0.58    1.03
   0  -4   4    0.18    0.77
  -1   4  -4 2214.19   45.34
  -1   4  -4 2350.18   50.65
  -2   4  -4  523.07   12.69
  -2   4  -4  521.14   12.10
  -3   4  -4  446.37   11.76
  -3   4  -4  437.62   10.84
  -4   4  -4   26.57    2.90
  -4   4  -4   30.59    2.62
  -5   4  -4 1350.11   28.61
  -5   4  -4 1333.10   32.14
  -6   4  -4   69.65    5.12
  -6   4  -4   64.88    4.07
  -7   4  -4  736.66   17.88
  -7   4  -4  749.02   20.65
  -8   4  -4   -3.09    3.17
  -8   4  -4   -1.44    2.23
  -9   4  -4   50.05    4.56
 -10   4  -4    3.20    2.90
 -11   4  -4   61.82    5.36
 -12   4  -4   38.78    4.84
 -13   4  -4   -4.04    3.28
 -14  -3   4  103.81   10.59
 -13  -3   4   34.74    6.62
 -12  -3   4  347.41   15.69
 -11  -3   4  306.87   13.94
 -10  -3   4   17.03    4.70
  -9  -3   4  409.63   15.04
  -8  -3   4  186.95    8.96
  -7  -3   4  812.32   22.41
  -6  -3   4 1292.14   32.11
  -5  -3   4  175.80    7.06
  -4  -3   4  672.19   17.46
   3   3  -4  311.46    7.80
   3   3  -4  327.09    7.06
  -3  -3   4  319.23    9.27
  -2  -3   4  933.25   22.61
   2   3  -4  978.68   20.09
   2   3  -4  984.57   18.25
   1   3  -4  194.33    4.51
   1   3  -4  198.65    5.36
  -1  -3   4  195.94    5.66
   0   3  -4  625.91   13.56
  -1   3  -4  779.45   17.02
  -1   3  -4  829.35   18.67
  -2   3  -4  342.97    8.42
  -2   3  -4  343.35    9.08
  -3   3  -4    1.45    1.37
  -3   3  -4    2.58    2.05
  -4   3  -4  763.45   19.29
  -4   3  -4  765.24   17.02
  -5   3  -4  327.20   10.37
  -5   3  -4  319.87    8.82
  -6   3  -4    3.44    2.42
  -6   3  -4    2.29    1.76
  -7   3  -4  240.33    9.82
  -7   3  -4  250.54    7.97
  -8   3  -4  124.79    5.81
  -8   3  -4  122.50    7.47
  -9   3  -4  433.93   12.41
  -9   3  -4  442.66   15.38
 -10   3  -4   16.74    4.90
 -10   3  -4   12.00    3.11
 -11   3  -4   74.23    5.53
 -12   3  -4  132.80    7.28
 -13   3  -4   68.38    6.16
 -14  -2   4    2.16    5.93
 -13  -2   4  358.96   16.69
 -12  -2   4   13.73    5.48
 -11  -2   4  192.77   11.03
 -10  -2   4   19.31    4.83
  -9  -2   4  619.14   19.55
  -8  -2   4   31.94    4.56
  -6  -2   4  319.94   10.98
  -5  -2   4  186.24    7.27
  -4  -2   4 3601.79   80.22
  -3  -2   4  634.42   15.74
   3   2  -4  599.47   13.33
  -2  -2   4  217.17    6.61
   2   2  -4  226.34    5.81
   2   2  -4  218.80    4.91
  -1  -2   4  126.47    4.30
   1   2  -4  127.66    4.04
   1   2  -4  127.85    3.20
   0   2  -4  348.49    8.85
   0   2  -4  330.19    7.92
  -1   2  -4  145.59    4.37
  -1   2  -4  153.82    4.81
  -2   2  -4  494.18   11.24
  -2   2  -4  512.96   12.77
  -3   2  -4   18.55    2.44
  -3   2  -4   16.26    1.76
  -4   2  -4   57.86    4.39
  -4   2  -4   60.16    3.25
  -5   2  -4  306.62   10.00
  -5   2  -4  299.79    8.20
  -6   2  -4  125.97    6.60
  -6   2  -4  129.34    4.99
  -7   2  -4  296.04    8.62
  -7   2  -4  288.13   10.76
  -8   2  -4 1471.67   37.15
  -8   2  -4 1454.71   31.38
  -9   2  -4  384.17   11.17
  -9   2  -4  391.20   14.55
 -10   2  -4   97.05    5.56
 -10   2  -4   97.58    7.94
 -11   2  -4   28.68    5.56
 -11   2  -4   32.56    4.05
 -12   2  -4   18.82    3.80
 -12   2  -4   17.81    5.74
 -13   2  -4   -5.06    3.05
 -14  -1   4   -5.38    5.23
 -13  -1   4   -0.97    5.01
 -12  -1   4    6.25    5.01
 -11  -1   4  365.17   15.20
 -10  -1   4  342.86   14.00
  -9  -1   4  447.10   15.62
  -8  -1   4    3.65    2.91
  -7  -1   4 1082.85   28.19
  -6  -1   4  586.81   16.66
  -3  -1   4  162.57    5.81
   2   1  -4  166.01    4.59
  -2  -1   4  157.55    5.44
  -1  -1   4  307.22    8.29
   1   1  -4  305.73    6.07
   0   1  -4 2060.90   45.77
   0   1  -4 2039.69   40.29
  -1   1  -4  374.46    9.92
  -1   1  -4  378.17    8.59
  -2   1  -4  993.52   24.15
  -2   1  -4 1069.34   21.12
  -3   1  -4  179.00    6.38
  -3   1  -4  186.57    5.16
  -4   1  -4  660.79   17.14
  -4   1  -4  643.44   14.35
  -5   1  -4   87.93    3.74
  -5   1  -4   82.49    5.29
  -6   1  -4  307.32   10.60
  -6   1  -4  309.16    8.35
  -7   1  -4   -1.50    1.53
  -7   1  -4    6.97    3.02
  -8   1  -4  199.02    9.37
  -8   1  -4  200.04    6.92
  -9   1  -4  139.55    6.01
  -9   1  -4  135.60    8.47
 -10   1  -4   78.74    5.00
 -10   1  -4   85.90    7.66
 -11   1  -4  369.72   15.29
 -11   1  -4  367.03   11.34
 -12   1  -4  124.90    6.79
 -12   1  -4  127.33    9.88
 -13   1  -4   96.18    9.78
 -14   0   4   32.06    7.35
 -13   0   4   14.87    5.73
 -12   0   4    0.07    4.67
 -11   0   4  455.39   17.27
 -10   0   4   42.91    5.91
  -9   0   4   51.20    5.77
  -8   0   4  253.60   10.39
  -7   0   4 1016.88   26.72
  -6   0   4   49.96    4.38
  -5   0   4 1665.80   39.32
  -4   0   4  492.12   13.53
  -3   0   4  335.40    9.55
  -2   0   4  922.11   21.76
   1   0  -4    0.49    1.98
   1   0  -4    4.21    1.21
   0   0  -4 3516.45   67.01
   0   0  -4 3398.18   76.05
  -1   0  -4  696.73   16.62
  -1   0  -4  678.50   14.21
  -2   0  -4    0.23    1.98
  -2   0  -4    0.25    0.99
  -3   0  -4  484.49   10.72
  -3   0  -4  485.86   13.14
  -4   0  -4  371.29   11.24
  -4   0  -4  385.74    8.95
  -5   0  -4  347.41   11.04
  -5   0  -4  344.11    8.52
  -6   0  -4 1890.16   38.29
  -6   0  -4 1894.94   44.93
  -7   0  -4   45.78    3.23
  -7   0  -4   46.09    4.65
  -8   0  -4  416.33   10.96
  -8   0  -4  424.03   14.65
  -9   0  -4  707.91   21.71
  -9   0  -4  718.89   17.02
 -10   0  -4   30.93    3.54
 -10   0  -4   30.99    5.84
 -11   0  -4  134.03    9.90
 -11   0  -4  135.19    6.42
 -12   0  -4   19.25    3.77
 -12   0  -4   33.39    6.53
 -13   0  -4   16.54    6.44
 -14   0  -4   23.00    7.40
 -14   1   4   -1.66    3.70
 -14   1   4   -5.66    5.52
 -13   1   4   22.79    6.17
 -12   1   4  426.11   17.35
 -11   1   4    2.38    4.52
 -10   1   4  257.19   11.95
  -9   1   4   11.31    4.02
  -8   1   4 1105.99   29.38
  -7   1   4  648.13   18.69
  -6   1   4    5.29    2.61
  -5   1   4    3.75    2.16
  -4   1   4    3.93    1.65
  -3   1   4  231.29    7.36
  -2   1   4  489.41   12.51
   1  -1  -4 1734.97   38.40
   1  -1  -4 1641.45   33.18
   0  -1  -4 2583.82   50.67
   0  -1  -4 2630.03   57.94
  -1  -1  -4  782.72   15.96
  -1  -1  -4  795.68   18.93
  -2  -1  -4  893.43   18.24
  -2  -1  -4  915.90   22.11
  -3  -1  -4  205.07    7.35
  -3  -1  -4  204.85    5.18
  -4  -1  -4  511.48   11.26
  -4  -1  -4  518.95   14.38
  -5  -1  -4    6.80    2.66
  -5  -1  -4    6.22    1.39
  -6  -1  -4 1015.76   20.81
  -6  -1  -4  946.14   25.33
  -7  -1  -4  599.36   17.79
  -7  -1  -4  591.71   13.70
  -8  -1  -4  126.92    7.71
  -8  -1  -4  124.08    4.98
  -9  -1  -4 1262.46   33.97
  -9  -1  -4 1280.26   27.43
 -10  -1  -4   48.88    6.15
 -10  -1  -4   46.30    3.85
 -11  -1  -4  384.30   15.92
 -11  -1  -4  403.43   11.52
 -12  -1  -4   62.07    7.57
 -13  -1  -4   -1.60    5.35
 -14  -1  -4   -2.85    6.18
 -14   2   4   30.53    7.57
 -14   2   4   24.09    4.81
 -13   2   4   61.93    5.56
 -13   2   4   55.58    7.71
 -12   2   4   52.59    7.16
 -11   2   4  214.60   11.41
 -10   2   4  410.09   15.50
  -9   2   4   77.25    6.80
  -8   2   4  305.17   11.76
  -7   2   4  183.32    8.33
  -6   2   4  111.55    6.09
  -5   2   4  135.96    6.18
  -4   2   4  273.57    8.76
  -3   2   4  235.54    7.53
  -2   2   4 2087.86   46.83
   1  -2  -4 1783.78   40.50
   0  -2  -4  686.83   16.82
   0  -2  -4  686.89   14.02
  -1  -2  -4  319.93    6.62
  -1  -2  -4  282.91    8.74
  -2  -2  -4 4532.29   86.70
  -2  -2  -4 4446.00   98.91
  -3  -2  -4  905.36   22.45
  -3  -2  -4  908.33   18.23
  -4  -2  -4   32.42    3.32
  -4  -2  -4   33.11    1.91
  -5  -2  -4  551.82   15.71
  -5  -2  -4  541.00   11.90
  -6  -2  -4  200.49    5.79
  -6  -2  -4  220.82    8.86
  -7  -2  -4  268.67   10.76
  -7  -2  -4  286.10    7.48
  -8  -2  -4 1025.05   21.92
  -8  -2  -4 1011.64   27.77
  -9  -2  -4  150.04    5.68
  -9  -2  -4  142.06    8.52
 -10  -2  -4   27.98    5.42
 -10  -2  -4   37.53    3.38
 -11  -2  -4   33.40    6.14
 -12  -2  -4   -3.26    4.62
 -13  -2  -4   13.51    6.47
 -14  -2  -4  153.26   12.39
 -14   3   4   15.56    6.90
 -14   3   4   11.26    4.54
 -13   3   4    5.86    3.68
 -13   3   4   -3.16    4.73
 -12   3   4    2.37    4.88
 -12   3   4   -0.87    3.16
 -11   3   4  133.64    9.32
 -10   3   4   19.13    4.85
  -9   3   4   25.91    4.64
  -8   3   4   16.26    3.92
  -7   3   4  198.11    8.60
  -6   3   4    5.51    2.44
  -5   3   4   49.49    4.11
  -4   3   4 1038.05   25.19
  -3   3   4  924.83   22.32
  -2   3   4 1417.94   32.49
   1  -3  -4  126.36    5.07
   0  -3  -4  268.31    8.28
  -1  -3  -4 2707.90   59.61
  -1  -3  -4 2568.63   51.88
   1   3   4 2737.60   48.05
  -2  -3  -4 1156.40   27.49
  -2  -3  -4 1120.38   22.58
   2   3   4 1152.97   21.18
  -3  -3  -4 2438.33   55.62
  -3  -3  -4 2439.65   47.47
  -4  -3  -4 2709.39   62.67
  -4  -3  -4 2797.63   53.50
  -5  -3  -4  690.38   14.42
  -5  -3  -4  689.55   18.94
  -6  -3  -4 1733.23   34.89
  -6  -3  -4 1773.01   42.33
  -7  -3  -4 2902.93   56.93
  -7  -3  -4 2882.67   67.43
  -8  -3  -4   41.25    5.07
  -8  -3  -4   44.94    3.06
  -9  -3  -4  275.62   12.21
  -9  -3  -4  280.41    8.00
 -10  -3  -4   81.27    7.80
 -10  -3  -4   81.44    4.47
 -11  -3  -4    1.66    4.53
 -12  -3  -4  461.73   18.57
 -13  -3  -4  122.98   10.80
 -14  -3  -4  134.37   11.85
 -14   4   4   44.27    8.03
 -13   4   4   50.18    7.40
 -13   4   4   48.07    5.53
 -12   4   4   19.11    5.57
 -12   4   4   25.42    4.41
 -11   4   4    0.93    3.02
 -11   4   4   -1.01    4.19
 -10   4   4  227.85   11.27
  -9   4   4   50.88    5.63
  -8   4   4   52.05    5.40
  -7   4   4  611.41   17.79
  -6   4   4 1155.19   28.88
  -5   4   4 1513.47   36.06
  -4   4   4    0.98    1.78
  -3   4   4  224.28    7.29
  -2   4   4  173.79    5.83
   1  -4  -4  427.94   11.59
   0  -4  -4  368.53   10.39
  -1  -4  -4   84.92    5.04
   1   4   4   92.01    2.81
  -2  -4  -4 1039.06   25.57
   2   4   4 1068.50   19.83
  -3  -4  -4   -1.45    2.03
   3   4   4    0.24    0.88
  -4  -4  -4  440.86    9.22
  -4  -4  -4  450.05   13.40
  -5  -4  -4  912.44   24.30
  -5  -4  -4  953.95   18.85
  -7  -4  -4  457.69   10.58
  -7  -4  -4  476.18   15.32
  -8  -4  -4   76.13    3.51
  -8  -4  -4   68.85    6.46
  -9  -4  -4  122.00    4.80
  -9  -4  -4  131.44    8.27
 -10  -4  -4  502.25   18.11
 -11  -4  -4   15.46    5.40
 -12  -4  -4   55.71    7.72
 -13  -4  -4   23.79    7.02
 -14  -4  -4  181.23   13.33
 -13   5   4  138.72    8.30
 -12   5   4  384.20   13.00
 -12   5   4  405.28   16.63
 -11   5   4  122.41    7.04
 -11   5   4  123.93    9.37
 -10   5   4  299.17   10.18
 -10   5   4  306.64   13.00
  -9   5   4   57.21    6.01
  -8   5   4   71.33    6.25
  -7   5   4 1037.74   27.01
  -6   5   4  792.90   21.08
  -5   5   4  785.37   20.42
  -4   5   4    5.11    1.86
  -3   5   4 1340.62   31.35
  -2   5   4   76.17    3.68
   1  -5  -4 1528.58   35.24
   0  -5  -4  315.22    9.20
  -1  -5  -4 4220.52   93.82
   1   5   4 4298.66   76.32
   2   5   4 1388.99   25.47
  -2  -5  -4 1342.73   32.38
   3   5   4  765.26   15.08
  -3  -5  -4  767.74   20.03
   4   5   4    1.12    0.97
  -4  -5  -4    4.28    2.35
  -5  -5  -4   46.32    1.88
  -5  -5  -4   42.75    4.20
  -6  -5  -4  882.40   24.19
  -6  -5  -4  920.84   18.36
  -7  -5  -4   -0.14    2.58
  -7  -5  -4    1.38    1.08
  -8  -5  -4   -2.59    2.72
  -8  -5  -4    1.17    1.31
  -9  -5  -4   42.79    5.68
 -10  -5  -4   43.70    5.91
 -11  -5  -4  119.88    9.06
 -12  -5  -4  963.60   30.33
 -13  -5  -4  263.61   14.85
 -14  -5  -4   12.43    6.86
 -13   6   4   58.98    6.36
 -12   6   4   96.99    7.09
 -11   6   4   71.32    5.96
 -11   6   4   71.22    7.52
 -10   6   4  246.77   11.66
 -10   6   4  218.22    8.93
  -9   6   4  257.66   11.37
  -9   6   4  281.00    9.57
  -8   6   4   36.95    4.67
  -7   6   4  119.06    6.76
  -6   6   4    3.78    2.43
  -5   6   4   26.77    3.07
  -4   6   4  466.60   12.94
  -3   6   4   60.90    3.85
  -2   6   4   39.03    3.03
   1  -6  -4  302.01    9.01
   0  -6  -4  117.69    4.90
   1   6   4 2293.83   43.65
  -1  -6  -4 2207.84   50.77
   1   6   4 2234.60   41.07
   2   6   4 1204.76   22.95
  -2  -6  -4 1178.03   29.21
   2   6   4 1255.20   23.95
  -3  -6  -4    3.50    2.44
   3   6   4    0.17    1.00
   4   6   4  573.82   12.11
  -4  -6  -4  573.08   16.43
   5   6   4   58.65    3.10
  -5  -6  -4   53.82    5.43
  -5  -6  -4   59.79    1.84
  -6  -6  -4  161.72    4.10
  -6  -6  -4  165.88    8.25
  -7  -6  -4  466.13   15.39
  -7  -6  -4  448.24    9.94
  -8  -6  -4   12.63    4.08
  -9  -6  -4    0.53    4.07
 -10  -6  -4 1508.78   40.62
 -11  -6  -4  166.22   10.93
 -12  -6  -4  170.78   11.85
 -13  -6  -4  314.58   16.38
 -14  -6  -4  214.15   14.49
 -12   7   4  103.51    7.55
 -11   7   4   10.80    3.95
 -10   7   4   92.00    6.34
  -9   7   4   30.56    5.10
  -9   7   4   36.00    4.27
  -8   7   4    2.27    3.43
  -8   7   4    1.19    2.67
  -7   7   4   51.04    5.01
  -7   7   4   49.46    4.48
  -6   7   4  225.14    8.74
  -5   7   4  586.91   16.19
  -4   7   4  305.28    9.50
  -3   7   4   23.61    2.48
  -2   7   4   69.74    3.73
   1  -7  -4   47.66    3.59
   0  -7  -4  147.99    5.73
   0   7   4  150.10    4.21
  -1  -7  -4  556.70   14.93
   1   7   4  581.33   11.89
   1   7   4  565.46   11.81
   2   7   4  867.15   17.46
   2   7   4  943.94   17.83
  -2  -7  -4  857.41   22.43
   3   7   4 1644.06   30.74
  -3  -7  -4 1620.91   38.98
  -4  -7  -4  817.10   21.97
   4   7   4  801.48   16.42
   5   7   4  279.63    7.32
  -5  -7  -4  283.10   10.78
  -6  -7  -4    2.22    0.73
  -6  -7  -4    1.41    3.10
   6   7   4   -0.51    1.49
  -7  -7  -4 1246.93   32.85
  -8  -7  -4  762.59   22.84
  -9  -7  -4   89.96    8.02
 -10  -7  -4 1092.69   31.80
 -11  -7  -4   20.62    5.37
 -12  -7  -4    5.29    5.65
 -13  -7  -4  192.89   13.17
 -14  -7  -4   -7.47    6.21
 -12   8   4    6.57    4.41
 -11   8   4  256.67   10.64
 -10   8   4  310.38   11.22
  -9   8   4   28.85    4.17
  -8   8   4  319.89   10.56
  -8   8   4  314.37   11.96
  -7   8   4   25.56    4.01
  -7   8   4   22.84    3.49
  -6   8   4  630.04   17.82
  -6   8   4  648.87   16.02
  -5   8   4  113.04    5.25
  -5   8   4  123.79    5.93
  -4   8   4    4.88    1.95
  -4   8   4    7.54    2.04
  -3   8   4   15.29    2.19
  -3   8   4   22.32    2.43
  -2   8   4  695.87   17.53
  -2   8   4  720.22   15.78
   1  -8  -4  391.69   10.92
  -1   8   4  372.82    9.15
   0  -8  -4 1318.37   31.37
   0   8   4 1344.48   26.93
   1   8   4   31.78    2.04
  -1  -8  -4   36.27    3.27
   1   8   4   31.06    2.23
   2   8   4  381.74    8.09
  -2  -8  -4  354.00   11.32
   2   8   4  364.79    8.54
   3   8   4   30.96    2.51
   3   8   4   34.03    1.50
  -3  -8  -4   34.00    3.96
   4   8   4  955.74   18.88
  -4  -8  -4  906.39   24.56
   5   8   4   66.06    3.43
  -5  -8  -4   52.88    5.49
   6   8   4 1355.66   26.70
  -6  -8  -4 1333.67   34.64
  -7  -8  -4   63.27    6.49
  -8  -8  -4 1310.61   35.20
  -9  -8  -4  390.46   15.55
 -10  -8  -4  138.01    9.87
 -11  -8  -4  297.10   14.30
 -12  -8  -4  602.73   22.74
 -13  -8  -4  202.88   13.62
 -14  -8  -4   20.92    7.27
 -11   9   4  498.80   15.90
 -10   9   4   44.41    5.38
  -9   9   4    7.83    3.66
  -8   9   4  643.21   17.23
  -7   9   4  543.23   14.79
  -6   9   4   53.08    4.91
  -6   9   4   48.94    4.43
  -5   9   4  774.98   18.22
  -5   9   4  754.24   20.00
  -4   9   4  326.25    9.30
  -4   9   4  324.48   10.04
  -3   9   4  297.69    8.39
  -3   9   4  295.47    9.01
  -2   9   4   20.31    2.27
  -2   9   4   15.81    2.19
   1  -9  -4  137.82    5.70
  -1   9   4  134.50    4.70
   0   9   4 1781.22   35.77
   0  -9  -4 1790.46   41.30
   1   9   4   71.40    3.53
   1   9   4   80.25    3.13
  -1  -9  -4   77.95    4.65
  -2  -9  -4 2858.73   66.50
   2   9   4 2954.56   54.10
   2   9   4 2984.04   57.09
   3   9   4  194.26    5.81
  -3  -9  -4  199.05    8.60
   3   9   4  203.11    4.77
   4   9   4  451.83   10.49
  -4  -9  -4  447.93   14.40
   5   9   4  519.98   11.86
  -5  -9  -4  502.75   16.22
  -6  -9  -4  118.45    7.65
   6   9   4  125.79    4.92
  -7  -9  -4  166.28    9.30
   7   9   4  169.40    5.92
  -8  -9  -4   -1.74    3.37
  -9  -9  -4   12.73    4.96
 -10  -9  -4   21.94    5.79
 -11  -9  -4 1376.85   39.44
 -12  -9  -4 1242.77   37.48
 -13  -9  -4   99.79   10.13
 -14  -9  -4  174.22   14.09
 -11  10   4   29.52    5.30
 -10  10   4   14.44    4.44
  -9  10   4  271.46   10.59
  -8  10   4    5.73    3.19
  -7  10   4  481.90   13.85
  -6  10   4  573.38   15.25
  -5  10   4  148.05    6.37
  -4  10   4  143.86    5.89
  -2  10   4   17.01    2.30
  -1  10   4  927.30   20.33
   1 -10  -4  962.56   23.28
   0 -10  -4  153.64    6.21
   0  10   4  158.84    5.04
   1  10   4   15.09    2.07
  -1 -10  -4    7.59    2.48
   1  10   4   17.72    1.84
   2  10   4  606.44   13.08
  -2 -10  -4  617.55   16.83
   2  10   4  601.07   13.31
  -3 -10  -4  686.78   19.53
   3  10   4  688.97   15.03
   3  10   4  723.87   14.57
  -4 -10  -4 2183.24   52.51
   4  10   4 2237.82   41.84
   5  10   4    5.59    1.81
  -5 -10  -4    5.12    3.22
   6  10   4  844.23   18.12
  -6 -10  -4  841.91   24.24
   7  10   4    1.44    1.87
  -7 -10  -4   -0.59    3.68
  -8 -10  -4   36.56    5.94
  -9 -10  -4   71.52    7.49
 -10 -10  -4   19.45    5.82
 -11 -10  -4  149.31   11.12
 -12 -10  -4    0.00    5.76
 -13 -10  -4  102.11   10.25
 -14 -10  -4   26.41    8.63
 -10  11   4  111.66    7.69
  -9  11   4  267.68   10.50
  -8  11   4  180.25    8.34
  -7  11   4  177.34    7.85
  -6  11   4   13.06    3.17
  -5  11   4  300.70    9.68
  -4  11   4    1.59    2.29
  -3  11   4  896.46   20.44
  -2  11   4  129.47    5.26
  -1  11   4 1356.81   28.46
   0  11   4  368.85    9.46
   0 -11  -4  389.29   11.25
   1  11   4   11.53    1.96
   1  11   4    9.26    1.70
   2  11   4   25.93    2.48
  -2 -11  -4   29.94    3.55
   2  11   4   29.73    2.36
   3  11   4  201.61    6.18
   3  11   4  202.96    5.33
  -3 -11  -4  195.64    8.71
  -4 -11  -4   63.79    5.73
   4  11   4   62.49    3.69
  -5 -11  -4   47.67    5.14
   5  11   4   44.90    3.34
   6  11   4  293.75    8.39
  -6 -11  -4  278.78   12.05
   7  11   4   66.98    4.23
  -7 -11  -4   68.75    6.83
   8  11   4    9.79    2.52
  -8 -11  -4    5.46    4.58
  -9 -11  -4   14.83    5.42
 -10 -11  -4   28.66    6.27
 -11 -11  -4  257.44   14.45
 -12 -11  -4  353.51   17.48
 -13 -11  -4    2.01    6.38
 -14 -11  -4   78.59   10.99
 -10  12   4   -0.76    3.97
  -9  12   4   27.66    4.82
  -8  12   4  220.78    9.51
  -7  12   4   20.16    3.97
  -6  12   4  291.12   10.17
  -5  12   4  794.33   19.63
  -4  12   4  595.13   15.35
  -3  12   4   45.31    4.07
  -2  12   4 1289.41   27.84
  -1  12   4   11.52    2.21
  -1 -12  -4   82.13    4.99
   1  12   4   74.93    3.77
   1  12   4   78.40    4.13
   2  12   4   56.19    3.01
  -3 -12  -4   43.28    4.45
   3  12   4   48.38    3.44
   4  12   4    3.40    1.63
  -4 -12  -4    1.70    3.25
  -5 -12  -4  386.09   14.01
   5  12   4  371.25    9.98
   6  12   4  113.05    5.16
  -6 -12  -4  104.90    8.20
   7  12   4  327.18    9.49
  -7 -12  -4  324.98   13.83
  -8 -12  -4   84.87    8.28
   8  12   4   84.55    4.71
   9  12   4  268.45    9.02
  -9 -12  -4  266.20   13.52
 -10 -12  -4   -5.67    4.78
 -11 -12  -4   41.03    7.74
 -12 -12  -4  153.38   12.26
 -13 -12  -4  172.16   13.71
 -14 -12  -4    7.95    7.64
  -9  13   4   88.06    6.96
  -8  13   4   45.04    5.30
  -7  13   4   -6.62    2.99
  -6  13   4  233.83    9.14
  -5  13   4  633.79   16.80
  -4  13   4   30.84    3.69
  -3  13   4    0.51    2.34
  -2  13   4  116.31    5.57
  -1  13   4   35.92    3.27
   0  13   4   39.29    3.16
   1  13   4  165.51    6.12
   1  13   4  154.21    5.54
  -2 -13  -4   32.68    3.77
   2  13   4   32.93    2.86
   2  13   4   32.81    3.05
  -3 -13  -4   19.99    3.71
   3  13   4   20.87    2.65
   4  13   4   90.96    4.66
  -4 -13  -4   96.20    7.06
   5  13   4  238.50    7.68
  -5 -13  -4  230.94   11.01
  -6 -13  -4 1069.37   30.38
   6  13   4 1125.75   23.52
  -7 -13  -4 1314.48   35.88
   7  13   4 1316.48   27.52
  -8 -13  -4  134.15   10.19
   8  13   4  119.38    5.84
   9  13   4   41.22    4.00
  -9 -13  -4   42.98    6.87
 -10 -13  -4   38.32    7.19
 -11 -13  -4   33.32    7.30
 -12 -13  -4    1.91    6.06
 -13 -13  -4   23.65    7.84
  -9  14   4   76.71    7.03
  -8  14   4    3.30    3.83
  -7  14   4    5.75    3.68
  -6  14   4   93.37    6.38
  -5  14   4   13.22    3.58
  -4  14   4   96.78    5.81
  -3  14   4   78.67    5.18
  -2  14   4  213.84    7.74
  -1  14   4  775.00   18.32
   0  14   4    5.19    2.27
   1  14   4  161.59    6.34
   1  14   4  153.54    5.72
   2  14   4  808.26   18.19
   3  14   4  865.09   19.25
  -4 -14  -4  152.87    8.50
   4  14   4  146.22    6.16
  -5 -14  -4  226.45   11.14
   5  14   4  238.14    7.91
  -6 -14  -4  663.62   21.02
   6  14   4  621.68   15.40
   7  14   4  179.07    6.92
  -7 -14  -4  186.67   10.71
  -8 -14  -4  858.13   26.59
   8  14   4  830.84   19.55
   9  14   4  206.78    7.97
  -9 -14  -4  206.38   12.30
 -10 -14  -4  147.41   11.12
 -11 -14  -4   -0.04    5.74
 -12 -14  -4  289.48   16.36
 -13 -14  -4   90.28   10.80
  -8  15   4  114.11    7.88
  -7  15   4    4.64    3.84
  -6  15   4  284.45   10.86
  -5  15   4   26.57    4.28
  -4  15   4   -5.51    2.67
  -3  15   4  260.78    9.22
  -2  15   4  340.39   10.52
  -1  15   4   12.21    2.86
   0  15   4   64.44    4.42
   1  15   4  380.84   10.67
   1  15   4  361.50   10.05
   2  15   4   19.27    3.08
   3  15   4  226.42    7.74
   4  15   4    9.28    2.64
   5  15   4  698.90   16.74
   6  15   4  226.38    8.14
  -6 -15  -4  244.55   11.93
   7  15   4   29.25    3.34
  -7 -15  -4   47.40    6.64
   8  15   4  216.53    7.96
  -8 -15  -4  206.08   11.91
   9  15   4    6.41    2.90
  -9 -15  -4   15.79    5.65
  10  15   4  194.09    8.20
 -10 -15  -4  197.47   12.75
 -11 -15  -4   26.06    7.27
 -12 -15  -4    6.82    6.38
 -13 -15  -4   17.58    8.07
  -7  16   4   11.69    4.29
  -6  16   4  139.80    7.96
  -5  16   4   -2.21    3.17
  -4  16   4    2.00    3.08
  -3  16   4  594.33   16.19
  -2  16   4  277.87    9.57
  -1  16   4  171.76    7.12
   0  16   4   12.21    3.02
   0  16   4   14.24    2.90
   1  16   4    3.10    2.27
   2  16   4  238.69    8.35
   3  16   4   16.09    2.82
   4  16   4  260.84    8.85
   5  16   4   -6.87    1.86
   6  16   4    3.34    2.48
   7  16   4    7.15    2.87
  -8 -16  -4   52.56    7.29
   8  16   4   45.24    4.28
  -9 -16  -4  121.19   10.51
   9  16   4  104.31    6.15
  10  16   4  351.25   11.51
 -10 -16  -4  345.05   16.67
 -11 -16  -4    5.17    6.14
 -12 -16  -4   11.30    7.02
 -13 -16  -4   13.90    7.51
  -7  17   4    4.93    4.33
  -6  17   4   17.16    4.54
  -5  17   4   14.62    4.17
  -4  17   4   33.06    4.67
  -3  17   4   -2.77    2.99
  -2  17   4    7.88    3.16
  -1  17   4   85.27    5.52
   0  17   4   49.62    4.41
   1  17   4  209.21    8.04
   2  17   4  266.93    9.20
   3  17   4  502.75   13.68
   4  17   4  277.83    9.29
   5  17   4   -2.48    2.51
   6  17   4    5.77    2.95
   7  17   4   71.64    5.27
   8  17   4   -3.41    2.56
   9  17   4   18.49    3.73
  10  17   4   -1.65    2.88
 -10 -17  -4    1.59    5.51
 -11 -17  -4   -3.79    5.88
 -12 -17  -4  131.33   12.27
  -6  18   4   70.69    6.78
  -5  18   4   98.34    7.24
  -4  18   4   -5.15    3.20
  -3  18   4   32.66    4.53
  -2  18   4  750.77   19.38
   0  18   4  174.00    7.58
   1  18   4   50.04    4.47
   2  18   4   24.91    3.45
   3  18   4   46.02    4.43
   4  18   4  991.57   22.85
   5  18   4   14.04    3.50
   6  18   4  286.08   10.02
   7  18   4   13.77    3.57
   8  18   4  200.00    8.51
   9  18   4  232.69    9.39
  10  18   4   70.08    5.76
  11  18   4  105.81    7.14
  -5  19   4  204.12   10.06
  -4  19   4    8.87    3.87
  -3  19   4    8.23    3.62
  -1  19   4   -0.05    3.14
   0  19   4  103.54    6.29
   1  19   4  203.01    8.34
   2  19   4   46.59    4.60
   3  19   4  263.83    9.61
   4  19   4  126.81    6.83
   5  19   4  254.00    9.46
   6  19   4   52.60    4.97
   7  19   4    4.34    3.36
   8  19   4  113.16    6.87
   9  19   4   -0.54    3.21
  10  19   4  517.34   15.58
  -4  20   4   40.18    5.38
  -1  20   4    9.23    3.63
   0  20   4   42.41    4.43
   1  20   4  122.57    6.82
   2  20   4   12.03    3.50
   3  20   4   44.03    4.61
   4  20   4   22.27    3.94
   5  20   4    4.62    3.30
   6  20   4   76.49    6.10
   7  20   4   21.77    4.24
   8  20   4  171.05    8.47
   9  20   4   -3.23    3.33
  -1  21   4   11.66    4.12
   0  21   4  147.84    7.85
   1  21   4   44.32    4.66
   2  21   4   24.86    4.20
   3  21   4   22.87    3.99
   4  21   4   52.88    5.23
   5  21   4    4.37    3.61
   6  21   4    6.51    3.83
   7  21   4   25.96    4.66
   8  21   4    3.49    3.88
   1  22   4  118.22    7.50
   2  22   4   69.43    6.00
   3  22   4   67.05    5.87
   4  22   4  236.49   10.12
   5  22   4   88.82    6.93
   5  20  -5   13.02    4.10
   4  20  -5   -2.55    3.44
   3  20  -5   -3.93    3.66
   2  20  -5   -5.82    3.55
   8  19  -5   82.51    6.56
   7  19  -5    3.50    3.69
   6  19  -5  133.13    7.92
   5  19  -5   12.48    3.84
   4  19  -5   -6.44    3.08
   3  19  -5  136.88    7.64
   2  19  -5  459.54   14.29
   1  19  -5   -4.95    3.77
   0  19  -5  116.57    7.55
  -1  19  -5  138.82    8.23
  -1  19  -5  132.40    7.97
  -2  19  -5   70.19    6.43
   9  18  -5   11.54    4.25
   8  18  -5  223.59    9.54
   7  18  -5    5.57    3.75
   6  18  -5   97.86    6.54
   5  18  -5  319.47   11.16
   4  18  -5   -6.13    2.98
   3  18  -5    6.84    3.49
   2  18  -5  188.74    8.63
   1  18  -5  584.99   16.34
   0  18  -5  468.72   14.30
   0  18  -5  471.45   14.73
  -1  18  -5   -3.82    3.77
  -1  18  -5    1.02    3.27
  -2  18  -5   23.29    4.53
  -3  18  -5   85.22    6.94
  10  17  -5   31.65    4.93
   9  17  -5    6.40    3.48
   8  17  -5  219.90    9.16
   7  17  -5  184.91    8.30
   6  17  -5   58.47    5.07
   5  17  -5    8.66    3.20
   4  17  -5   -0.30    3.08
   3  17  -5    8.40    3.57
   2  17  -5  228.40    9.02
   1  17  -5    0.98    3.22
   1  17  -5    4.47    2.93
   0  17  -5   82.21    6.02
   0  17  -5   87.18    6.24
  -1  17  -5   -4.39    2.83
  -1  17  -5    0.30    3.87
  -2  17  -5   -0.33    3.09
  -3  17  -5   39.32    5.10
  -4  17  -5  124.40    7.85
  10  16  -5   43.05    4.89
   9  16  -5  367.61   12.09
   8  16  -5   14.00    3.59
   7  16  -5   19.00    3.86
   6  16  -5   23.68    3.70
   5  16  -5    3.45    2.86
   4  16  -5   10.05    3.15
   3  16  -5   26.00    3.74
   2  16  -5   85.89    5.87
   2  16  -5   91.93    5.89
   1  16  -5   13.38    3.57
   1  16  -5   14.13    3.35
   0  16  -5   -1.91    2.55
   0  16  -5   -2.07    2.97
  -1  16  -5   28.37    4.09
  -2  16  -5   15.39    3.87
  -3  16  -5   -0.04    2.96
  -4  16  -5    0.47    3.24
  -5  16  -5  113.98    7.68
  10  15  -5   24.50    4.10
   9  15  -5   -0.67    2.79
   8  15  -5   92.04    5.80
   7  15  -5  146.14    6.92
   6  15  -5   -0.25    2.70
   5  15  -5  530.80   14.18
   4  15  -5   34.66    3.91
   3  15  -5   -0.21    2.58
   3  15  -5    2.92    2.66
   2  15  -5   35.03    3.93
   2  15  -5   20.79    3.69
   1  15  -5    7.33    3.23
   1  15  -5    6.86    2.94
   0  15  -5  489.38   13.42
   0  15  -5  473.16   13.98
  -1  15  -5   32.13    4.14
  -2  15  -5    0.70    2.91
  -3  15  -5    2.95    3.10
  -4  15  -5    7.28    3.62
  -5  15  -5    9.38    3.86
  -6  15  -5   62.23    6.19
   9  14  -5  223.96    8.68
   8  14  -5  100.08    5.98
   7  14  -5  152.23    7.03
   6  14  -5   94.74    5.69
   5  14  -5 2096.26   41.78
   3  14  -5  250.65    8.87
   3  14  -5  245.39    8.43
   2  14  -5  314.59   10.31
   2  14  -5  334.42   10.14
   1  14  -5  249.38    8.78
   1  14  -5  266.44    9.16
   0  14  -5  315.46   10.54
   0  14  -5  330.70   10.28
  -1  14  -5   -0.96    2.54
  -2  14  -5  106.09    6.11
  -3  14  -5    5.97    3.21
  -4  14  -5   20.47    4.08
  -5  14  -5   18.16    3.99
  -6  14  -5  330.91   12.31
  -7  14  -5   -2.62    3.78
 -13 -13   5  251.17   15.35
 -12 -13   5   60.98    8.43
 -11 -13   5   50.71    7.79
   9  13  -5   20.71    3.41
   8  13  -5   64.33    4.98
   7  13  -5    8.08    2.92
   6  13  -5   54.65    4.29
   5  13  -5   52.31    4.20
   4  13  -5  123.84    5.89
   4  13  -5  112.24    5.64
   3  13  -5 1122.22   23.87
   3  13  -5 1107.53   25.39
   2  13  -5  292.47    9.67
   2  13  -5  303.21    9.32
   1  13  -5  164.88    6.84
   1  13  -5  143.28    6.57
   0  13  -5   -1.23    2.29
   0  13  -5   -2.73    2.36
  -1  13  -5    3.00    2.49
  -2  13  -5   11.03    3.03
  -3  13  -5  169.47    7.67
  -4  13  -5    9.03    3.48
  -5  13  -5   32.53    4.47
  -6  13  -5   92.46    6.56
  -7  13  -5   52.35    5.82
  -8  13  -5  564.99   17.64
 -13 -12   5    6.96    6.34
 -12 -12   5   53.10    7.92
 -11 -12   5    3.92    5.15
 -10 -12   5    7.12    5.17
  -9 -12   5   60.03    6.87
   9  12  -5   56.65    4.63
  -8 -12   5   18.37    4.59
   8  12  -5   16.94    3.12
   7  12  -5  321.08    9.73
   6  12  -5    8.47    2.69
   5  12  -5   50.80    4.26
   5  12  -5   48.07    4.00
   4  12  -5   -0.03    2.15
   4  12  -5   -0.56    2.12
   3  12  -5  428.12   11.80
   3  12  -5  413.79   11.03
   2  12  -5   -1.29    2.24
   2  12  -5   -0.06    2.14
   1  12  -5   50.21    4.22
   1  12  -5   50.40    4.31
   0  12  -5   37.04    3.70
  -1  12  -5   18.77    3.03
  -2  12  -5  133.67    6.45
  -3  12  -5    7.21    2.92
  -4  12  -5   11.80    3.25
  -5  12  -5  107.37    6.35
  -6  12  -5    0.00    3.14
  -7  12  -5   15.14    4.00
  -8  12  -5  243.69   10.57
 -13 -11   5  153.82   12.08
 -12 -11   5   59.90    8.17
 -11 -11   5   -1.82    4.52
 -10 -11   5  322.50   14.71
  -9 -11   5  589.23   19.97
  -8 -11   5   75.86    6.92
   8  11  -5   71.80    4.68
  -7 -11   5  452.67   15.48
   7  11  -5  447.29   11.88
   6  11  -5   45.65    3.88
  -6 -11   5   55.62    5.49
   6  11  -5   45.89    4.00
   5  11  -5   27.11    3.06
   5  11  -5   19.16    2.95
   4  11  -5   74.41    4.60
   4  11  -5   84.77    4.49
   3  11  -5   78.07    4.58
   3  11  -5   75.01    4.30
   2  11  -5  485.37   11.92
   2  11  -5  460.93   12.56
   1  11  -5   20.93    2.97
   1  11  -5   29.61    3.17
   0  11  -5 1284.04   28.34
  -1  11  -5  192.65    7.29
  -2  11  -5    0.73    2.28
  -3  11  -5   30.24    3.67
  -4  11  -5   -3.76    2.30
  -5  11  -5    3.31    3.04
  -6  11  -5   82.45    5.97
  -7  11  -5  103.64    6.74
  -8  11  -5   -0.19    3.59
  -9  11  -5    9.36    4.15
 -13 -10   5   16.43    6.75
 -12 -10   5    7.47    5.66
 -11 -10   5  161.48   11.17
 -10 -10   5  132.57    9.74
  -9 -10   5  648.93   21.32
   8  10  -5  317.84    9.38
  -8 -10   5  280.97   12.44
  -7 -10   5  494.65   16.52
   7  10  -5  516.48   12.77
  -6 -10   5  351.25   12.72
   6  10  -5  373.04   10.25
   6  10  -5  364.12    9.87
   5  10  -5   94.40    4.64
  -5 -10   5   96.77    6.13
   5  10  -5  101.34    4.90
   4  10  -5   40.50    3.57
   3  10  -5  227.10    6.92
   3  10  -5  226.84    7.41
   2  10  -5   12.75    2.28
   1  10  -5   70.05    3.95
   1  10  -5   63.92    4.19
   0  10  -5  433.34   11.69
  -1  10  -5   39.15    3.45
  -2  10  -5 1140.78   25.74
  -3  10  -5  429.86   12.25
  -4  10  -5  148.79    6.74
  -5  10  -5    3.31    2.70
  -6  10  -5    7.16    3.18
  -7  10  -5   26.99    4.15
  -8  10  -5   59.37    5.75
  -9  10  -5  384.42   13.44
 -10  10  -5    4.77    4.17
 -13  -9   5  114.10   10.58
 -12  -9   5    1.95    5.12
 -11  -9   5  178.69   11.28
 -10  -9   5   14.18    5.15
  -9  -9   5  475.40   17.22
  -8  -9   5  651.93   20.42
   7   9  -5   91.43    4.76
  -7  -9   5   98.74    6.92
   7   9  -5   99.33    4.93
   6   9  -5  102.10    4.75
   6   9  -5  112.73    4.95
  -6  -9   5  103.29    6.80
   5   9  -5  121.02    4.89
   5   9  -5  120.07    5.18
  -5  -9   5  121.84    6.34
  -4  -9   5   43.30    4.29
   4   9  -5   49.03    3.41
   4   9  -5   45.25    3.49
   3   9  -5   47.22    3.48
   3   9  -5   44.57    3.12
  -3  -9   5   44.51    3.70
   2   9  -5  112.27    4.90
   2   9  -5  114.58    4.60
   1   9  -5  271.77    8.18
   1   9  -5  268.06    7.51
   0   9  -5  213.20    7.16
  -1   9  -5   16.56    2.46
  -2   9  -5  211.05    7.39
  -3   9  -5  177.28    6.87
  -4   9  -5  316.18   10.00
  -5   9  -5  393.68   11.88
  -6   9  -5 1112.25   26.21
  -7   9  -5   38.42    4.37
  -8   9  -5  195.22    8.79
  -9   9  -5  158.85    8.30
 -10   9  -5   43.34    5.59
 -11   9  -5   19.31    4.96
 -13  -8   5  130.73   11.06
 -12  -8   5    3.69    5.25
 -11  -8   5  175.50   11.19
 -10  -8   5  331.91   14.35
  -9  -8   5  789.80   24.09
  -8  -8   5   61.62    6.02
   7   8  -5  305.83    8.64
  -7  -8   5  295.07   11.67
   6   8  -5   92.55    4.58
   6   8  -5   96.81    4.38
  -6  -8   5  103.65    6.61
   5   8  -5  123.73    4.94
   5   8  -5  132.22    5.25
  -5  -8   5  132.83    6.51
   4   8  -5 1272.21   27.24
   4   8  -5 1263.01   25.24
  -4  -8   5 1299.73   30.97
   3   8  -5  109.44    4.35
   3   8  -5  105.39    4.63
  -3  -8   5  113.95    5.05
  -2  -8   5  719.28   17.07
   2   8  -5  682.76   16.07
   2   8  -5  677.59   14.75
   1   8  -5  640.79   15.08
   1   8  -5  634.51   13.82
   0   8  -5 1103.10   24.05
  -1   8  -5  482.91   12.31
  -2   8  -5   99.94    4.84
  -3   8  -5    2.18    1.94
  -4   8  -5  223.80    7.86
  -5   8  -5  152.19    6.76
  -6   8  -5  440.66   12.89
  -7   8  -5   -1.06    2.78
  -8   8  -5   16.96    3.86
  -9   8  -5   -3.94    3.02
 -10   8  -5  102.55    7.24
 -11   8  -5  154.46    8.84
 -13  -7   5   10.80    6.03
 -12  -7   5   33.31    6.84
 -11  -7   5    7.27    4.96
 -10  -7   5   31.06    5.77
  -9  -7   5  110.17    7.74
  -8  -7   5  474.22   16.24
  -7  -7   5   55.12    5.23
   6   7  -5  177.27    5.80
   6   7  -5  174.58    6.02
  -6  -7   5  180.35    8.24
   5   7  -5 1074.45   23.32
  -5  -7   5 1103.73   27.40
   5   7  -5 1066.53   21.73
  -4  -7   5  494.12   13.97
   4   7  -5  487.58   11.11
   4   7  -5  487.12   11.94
  -3  -7   5   18.39    2.50
   3   7  -5   19.69    2.24
   3   7  -5   17.60    1.89
   2   7  -5  123.04    4.23
   2   7  -5  114.32    4.67
  -2  -7   5  119.65    4.74
   1   7  -5  181.38    5.46
   1   7  -5  190.85    6.20
  -1  -7   5  190.94    5.62
   0   7  -5 4258.70   83.78
  -1   7  -5 2017.31   41.32
  -2   7  -5  581.22   14.14
  -3   7  -5 1626.79   34.31
  -4   7  -5    1.67    1.97
  -5   7  -5  151.01    6.55
  -6   7  -5  114.90    6.05
  -7   7  -5    1.41    2.78
  -8   7  -5  711.57   18.69
  -9   7  -5   23.87    4.12
 -10   7  -5  310.29   11.50
 -11   7  -5   -2.52    3.48
 -12   7  -5  199.29   10.11
 -14  -6   5   94.94   10.18
 -13  -6   5   27.54    6.35
 -12  -6   5  179.23   11.72
 -11  -6   5  222.85   12.21
 -10  -6   5    0.87    4.10
  -9  -6   5    0.01    3.67
  -8  -6   5  315.63   12.33
  -7  -6   5  339.16   12.44
   6   6  -5   48.52    3.13
  -6  -6   5   52.12    4.67
  -5  -6   5  343.99   11.18
   5   6  -5  332.06    8.95
   5   6  -5  347.08    8.46
  -4  -6   5  833.67   21.07
   4   6  -5  836.49   16.82
   4   6  -5  798.37   18.13
   3   6  -5 1509.71   31.09
   3   6  -5 1501.78   28.54
  -3  -6   5 1492.39   34.89
   2   6  -5   91.95    4.01
   2   6  -5   94.77    3.62
  -2  -6   5   93.49    4.12
   1   6  -5    8.54    1.73
   1   6  -5    5.28    1.36
  -1  -6   5    4.85    1.33
   0   6  -5  932.89   20.36
  -1   6  -5  101.73    4.30
  -2   6  -5 1450.08   30.44
  -3   6  -5   17.12    2.36
  -4   6  -5   12.28    2.29
  -5   6  -5  188.05    7.02
  -6   6  -5 1241.48   27.78
  -7   6  -5    3.47    2.71
  -8   6  -5  399.24   12.27
  -9   6  -5  552.68   15.69
 -10   6  -5  261.53   10.15
 -11   6  -5   22.97    4.55
 -12   6  -5  219.61   10.12
 -14  -5   5   97.92   10.35
 -13  -5   5  311.78   15.83
 -12  -5   5  159.08   11.05
 -11  -5   5  558.75   20.11
 -10  -5   5  679.71   22.00
  -9  -5   5  183.49    9.90
  -8  -5   5  414.43   14.57
  -7  -5   5    1.94    2.83
  -6  -5   5  207.52    8.69
  -5  -5   5  899.53   23.12
   5   5  -5  891.63   18.09
   5   5  -5  889.97   19.51
   4   5  -5  490.94   10.75
   4   5  -5  503.56   11.82
  -4  -5   5  487.59   13.84
   3   5  -5  482.89   10.24
   3   5  -5  456.41   11.30
  -3  -5   5  493.65   12.99
   2   5  -5   -0.08    1.08
   2   5  -5    2.95    1.37
  -2  -5   5    0.83    1.40
  -1  -5   5  243.88    6.68
   1   5  -5  229.14    6.75
   1   5  -5  236.27    5.88
   0   5  -5 2174.28   43.35
   0  -5   5 2134.65   47.50
  -1   5  -5   17.56    2.09
  -1   5  -5   21.72    1.79
  -2   5  -5  315.68    8.57
  -2   5  -5  320.03    8.25
  -3   5  -5  215.85    6.76
  -3   5  -5  217.94    6.81
  -4   5  -5    4.27    2.21
  -4   5  -5    4.02    1.85
  -5   5  -5   33.25    3.53
  -5   5  -5   23.32    2.87
  -6   5  -5 1090.14   24.60
  -7   5  -5   39.56    3.85
  -8   5  -5  181.12    7.55
  -9   5  -5  567.87   15.67
 -10   5  -5  197.56    8.50
 -11   5  -5   63.21    5.76
 -12   5  -5  181.71    9.00
 -13   5  -5  225.70   10.43
 -14  -4   5   76.00    9.46
 -13  -4   5   95.68    9.61
 -12  -4   5  550.90   20.68
 -11  -4   5  135.72    9.61
 -10  -4   5    8.55    4.30
  -9  -4   5  133.21    8.65
  -8  -4   5  315.73   12.37
  -7  -4   5  198.80    8.74
  -6  -4   5   35.69    3.72
  -5  -4   5  696.83   18.73
   4   4  -5  260.24    7.26
   4   4  -5  272.68    6.60
  -4  -4   5  275.71    8.95
   3   4  -5  272.77    6.48
  -3  -4   5  274.92    8.49
   3   4  -5  273.74    7.33
   2   4  -5   15.92    1.76
   2   4  -5   15.73    1.41
  -2  -4   5   18.06    1.96
   1   4  -5 2171.61   43.34
  -1  -4   5 2179.41   48.16
   1   4  -5 2156.35   39.60
   0  -4   5   46.68    2.30
   0   4  -5   48.83    2.88
  -1   4  -5  164.58    5.07
  -1   4  -5  157.17    5.11
  -2   4  -5  787.35   18.78
  -2   4  -5  808.78   17.56
  -3   4  -5   54.36    3.29
  -3   4  -5   40.94    3.49
  -4   4  -5  406.33   11.76
  -4   4  -5  406.21   10.54
  -5   4  -5  141.73    6.61
  -5   4  -5  137.66    5.53
  -6   4  -5   -2.42    1.69
  -6   4  -5    1.34    2.88
  -7   4  -5 1636.06   39.85
  -7   4  -5 1596.45   34.68
  -8   4  -5   91.89    5.50
  -9   4  -5  215.33    8.31
 -10   4  -5   46.45    4.58
 -11   4  -5   42.22    4.72
 -12   4  -5    6.12    3.59
 -13   4  -5   85.03    6.89
 -14  -3   5   15.33    6.84
 -13  -3   5   32.47    7.08
 -12  -3   5 1107.29   33.12
 -11  -3   5    7.57    4.88
 -10  -3   5   30.42    5.34
  -9  -3   5  725.14   22.15
  -7  -3   5  310.39   11.31
  -6  -3   5 1545.04   37.63
  -5  -3   5  579.94   16.11
   4   3  -5    2.91    1.32
  -4  -3   5    0.29    1.85
   3   3  -5   47.37    2.84
   3   3  -5   57.74    2.38
  -3  -3   5   54.33    3.56
   2   3  -5  854.70   18.09
   2   3  -5  857.47   16.19
  -2  -3   5  837.53   20.27
   1   3  -5 1410.73   29.09
  -1  -3   5 1430.75   32.37
   1   3  -5 1454.66   26.38
   0   3  -5  589.76   14.55
   0   3  -5  587.41   13.12
  -1   3  -5    3.71    1.28
  -1   3  -5    3.54    1.38
  -2   3  -5   -0.40    1.41
  -2   3  -5    0.12    1.20
  -3   3  -5  165.97    5.40
  -3   3  -5  150.32    6.04
  -4   3  -5   20.99    3.00
  -4   3  -5   14.50    2.04
  -5   3  -5  188.57    7.65
  -5   3  -5  179.38    6.19
  -6   3  -5  109.14    4.92
  -6   3  -5  112.65    6.49
  -7   3  -5  239.32    7.96
  -7   3  -5  234.86    9.92
  -8   3  -5    5.70    2.56
  -8   3  -5    4.62    3.54
  -9   3  -5  240.93    8.75
  -9   3  -5  254.66   11.58
 -10   3  -5  147.91    7.04
 -11   3  -5   10.43    3.35
 -12   3  -5  150.42    7.81
 -13   3  -5    5.85    3.74
 -14  -2   5   14.81    6.74
 -13  -2   5   33.00    6.93
 -12  -2   5  111.24    9.05
 -11  -2   5   39.90    6.30
 -10  -2   5    1.06    3.56
  -9  -2   5  270.96   11.88
  -8  -2   5  530.13   17.00
  -7  -2   5  325.66   11.75
  -6  -2   5  394.38   12.67
  -5  -2   5  652.26   17.64
  -4  -2   5  179.42    6.75
   3   2  -5 5749.84  103.80
  -3  -2   5 5886.23  127.31
   2   2  -5  763.82   14.51
  -2  -2   5  751.74   18.52
   2   2  -5  783.19   16.37
   1   2  -5    0.18    1.01
   1   2  -5   -0.08    0.67
  -1  -2   5   -0.60    1.11
   0   2  -5    8.35    1.35
   0   2  -5    6.31    1.51
  -1   2  -5 7573.89  149.13
  -1   2  -5 7780.57  167.59
  -2   2  -5 1247.69   26.12
  -2   2  -5 1305.21   29.51
  -3   2  -5   24.57    2.84
  -3   2  -5   19.58    1.91
  -4   2  -5  333.35   10.44
  -4   2  -5  329.93    8.68
  -5   2  -5   61.69    3.55
  -5   2  -5   66.26    5.06
  -6   2  -5    1.41    2.77
  -6   2  -5    3.07    1.70
  -7   2  -5  359.71   10.07
  -7   2  -5  367.69   12.81
  -8   2  -5   38.94    3.64
  -8   2  -5   35.44    4.93
  -9   2  -5   70.93    6.78
  -9   2  -5   56.04    4.61
 -10   2  -5    8.57    4.50
 -10   2  -5   11.83    3.05
 -11   2  -5  376.59   11.82
 -11   2  -5  367.49   15.56
 -12   2  -5   -2.87    2.82
 -14  -1   5   65.15    8.87
 -13  -1   5   33.49    6.93
 -12  -1   5  593.28   21.37
 -11  -1   5    1.17    4.30
 -10  -1   5  271.36   12.47
  -9  -1   5    8.92    4.05
  -8  -1   5  809.58   23.11
  -7  -1   5  527.95   16.23
  -6  -1   5 1267.24   31.56
  -5  -1   5   11.07    2.57
  -4  -1   5  717.98   18.56
  -3  -1   5 2321.24   51.55
   3   1  -5 2240.93   45.17
  -2  -1   5  385.38   10.50
   2   1  -5  393.65    9.09
   1   1  -5    5.99    0.72
   1   1  -5    4.26    1.14
   0   1  -5   59.33    3.53
   0   1  -5   65.26    2.85
  -1   1  -5  292.31    7.17
  -1   1  -5  297.69    8.32
  -2   1  -5    3.55    1.76
  -2   1  -5    4.97    1.16
  -3   1  -5 1182.46   24.74
  -3   1  -5 1232.08   28.79
  -4   1  -5  306.39    9.91
  -4   1  -5  290.43    7.79
  -5   1  -5   94.48    5.65
  -5   1  -5  102.80    4.15
  -6   1  -5  408.31   13.21
  -6   1  -5  408.75   10.46
  -7   1  -5  568.47   13.86
  -7   1  -5  570.44   17.19
  -8   1  -5  359.12   10.16
  -8   1  -5  352.96   13.15
  -9   1  -5   49.74    4.26
  -9   1  -5   56.44    6.09
 -10   1  -5  538.04   18.76
 -10   1  -5  525.02   14.23
 -11   1  -5  242.34   12.45
 -11   1  -5  240.99    8.92
 -12   1  -5  100.46    6.27
 -12   1  -5   95.17    9.33
 -14   0   5   68.04    8.96
 -13   0   5   17.05    6.09
 -12   0   5   80.59    8.21
 -11   0   5   24.91    5.15
 -10   0   5   -1.76    3.53
  -9   0   5  285.74   12.02
  -8   0   5   54.28    5.38
  -7   0   5  255.85    9.93
  -6   0   5 5419.21  120.46
  -5   0   5    5.07    2.32
  -4   0   5  478.34   13.37
  -3   0   5  678.65   17.20
   2   0  -5   46.85    2.45
  -2   0   5   47.97    2.94
   1   0  -5  575.19   14.78
   0   0  -5  194.78    5.28
   0   0  -5  199.47    6.71
  -1   0  -5   83.18    3.11
  -1   0  -5   91.03    4.51
  -2   0  -5  669.66   16.88
  -2   0  -5  671.43   14.18
  -3   0  -5    0.77    1.00
  -3   0  -5    1.63    2.07
  -4   0  -5 1059.45   26.20
  -4   0  -5 1052.89   21.97
  -5   0  -5   40.28    4.09
  -5   0  -5   36.11    2.81
  -6   0  -5   72.61    5.57
  -6   0  -5   68.05    3.63
  -7   0  -5  214.12    6.72
  -7   0  -5  219.08    9.57
  -8   0  -5  326.60   12.71
  -8   0  -5  350.06    9.57
  -9   0  -5  205.92    7.20
  -9   0  -5  192.45   10.15
 -10   0  -5  155.21    9.71
 -10   0  -5  160.88    6.66
 -11   0  -5    6.80    2.85
 -11   0  -5    8.94    4.95
 -12   0  -5  197.76   12.16
 -13   0  -5  328.94   16.40
 -14   0  -5   84.85    9.96
 -14   1   5   79.36    9.38
 -14   1   5   77.86    6.57
 -13   1   5    0.03    4.94
 -12   1   5  208.31   12.03
 -11   1   5   90.42    8.27
 -10   1   5    3.54    4.18
  -9   1   5    5.71    3.49
  -8   1   5   27.09    4.35
  -7   1   5  138.66    7.39
  -6   1   5 4607.70  103.11
  -4   1   5   70.56    4.35
  -3   1   5 2301.88   51.99
  -2   1   5  283.56    8.29
   1  -1  -5  318.46    7.22
   1  -1  -5  278.88    9.09
   0  -1  -5  985.70   23.84
   0  -1  -5 1013.74   20.29
  -1  -1  -5  201.63    5.35
  -1  -1  -5  212.91    7.35
  -2  -1  -5   44.46    3.89
  -2  -1  -5   42.18    2.21
  -3  -1  -5  788.46   16.43
  -3  -1  -5  798.56   20.22
  -4  -1  -5  718.09   19.07
  -4  -1  -5  718.44   15.29
  -5  -1  -5  592.26   16.90
  -5  -1  -5  594.87   13.21
  -6  -1  -5  105.30    6.51
  -6  -1  -5  103.64    4.13
  -7  -1  -5  197.03    6.10
  -7  -1  -5  184.90    8.51
  -8  -1  -5  841.05   23.84
  -8  -1  -5  821.74   18.63
  -9  -1  -5  118.76    5.32
  -9  -1  -5  116.79    8.26
 -10  -1  -5   -0.38    4.24
 -10  -1  -5    2.03    2.29
 -11  -1  -5  155.85   10.37
 -11  -1  -5  167.65    6.94
 -12  -1  -5   18.52    6.15
 -13  -1  -5   13.60    6.63
 -14  -1  -5  182.98   13.69
 -14   2   5    0.23    3.88
 -14   2   5    3.17    5.86
 -13   2   5    5.93    5.27
 -12   2   5   77.06    7.90
 -11   2   5  557.12   19.68
 -10   2   5   72.58    6.75
  -9   2   5   25.71    4.67
  -8   2   5   39.92    4.83
  -7   2   5  456.67   14.57
  -6   2   5 2208.18   51.75
  -5   2   5  592.55   16.41
  -4   2   5  421.70   12.05
  -3   2   5  142.65    5.49
  -2   2   5    1.31    1.39
   1  -2  -5   -0.43    1.75
   0  -2  -5   20.20    3.12
   0   2   5   26.66    1.26
  -1  -2  -5 5374.40  104.40
  -1  -2  -5 5441.69  118.46
  -2  -2  -5    1.05    2.44
  -2  -2  -5    1.27    0.87
  -3  -2  -5   25.49    3.06
  -3  -2  -5   21.21    1.69
  -4  -2  -5   50.34    4.62
  -4  -2  -5   49.38    2.38
  -5  -2  -5  941.68   24.85
  -5  -2  -5  969.76   19.89
  -6  -2  -5  269.81    7.12
  -6  -2  -5  274.46   10.46
  -7  -2  -5 1279.79   32.99
  -7  -2  -5 1287.28   26.67
  -8  -2  -5  124.87    7.93
  -8  -2  -5  123.79    4.85
  -9  -2  -5    2.78    4.04
  -9  -2  -5    4.46    2.06
 -10  -2  -5   49.69    6.43
 -10  -2  -5   47.16    4.10
 -11  -2  -5 1266.86   35.86
 -12  -2  -5  179.71   11.71
 -13  -2  -5  359.76   17.27
 -14  -2  -5   82.07    9.96
 -14   3   5   67.19    9.28
 -14   3   5   71.91    6.52
 -13   3   5    0.50    5.48
 -13   3   5    7.12    3.86
 -12   3   5   81.20    8.18
 -11   3   5    8.25    4.78
 -10   3   5  543.54   18.58
  -9   3   5   -1.01    3.36
  -8   3   5    0.06    3.05
  -7   3   5  270.71   10.36
  -6   3   5 1948.61   46.12
  -5   3   5 1406.70   33.87
  -4   3   5   41.57    3.68
  -3   3   5 1256.22   29.67
  -2   3   5 2539.09   56.75
   1  -3  -5 6377.61  139.32
   0  -3  -5 4738.86  104.18
  -1  -3  -5  702.02   17.15
  -1  -3  -5  629.99   13.60
   1   3   5  683.82   12.63
  -2  -3  -5  347.15   10.45
   2   3   5  345.70    7.10
  -2  -3  -5  344.31    7.38
  -3  -3  -5  270.25    9.19
  -3  -3  -5  282.68    6.18
  -4  -3  -5  931.06   18.58
  -4  -3  -5  900.75   23.56
  -5  -3  -5   69.38    5.70
  -5  -3  -5   59.04    2.73
  -6  -3  -5 2520.05   49.64
  -6  -3  -5 2524.74   59.16
  -7  -3  -5   89.31    6.69
  -7  -3  -5   84.72    3.70
  -8  -3  -5  348.20   13.36
  -8  -3  -5  357.12    9.07
  -9  -3  -5  369.49    9.80
  -9  -3  -5  373.15   14.53
 -10  -3  -5   15.75    4.89
 -11  -3  -5   64.57    7.04
 -12  -3  -5  137.15   10.77
 -13  -3  -5   14.01    6.69
 -14  -3  -5   96.53   10.61
 -14   4   5   16.89    6.68
 -13   4   5  102.27    9.55
 -13   4   5   87.74    6.86
 -12   4   5   40.22    4.94
 -12   4   5   43.30    6.64
 -11   4   5    5.14    4.70
 -10   4   5  505.03   17.71
  -9   4   5  268.40   11.56
  -8   4   5    0.29    3.13
  -7   4   5   27.02    3.84
  -6   4   5    1.66    2.23
  -5   4   5   78.18    4.80
  -4   4   5    5.73    2.06
  -3   4   5  159.99    6.06
  -2   4   5 4722.54  103.60
   1  -4  -5   73.23    4.05
   0  -4  -5 1307.98   30.72
  -1  -4  -5 6454.25  142.61
   1   4   5 6601.01  117.07
   2   4   5  936.90   17.03
  -2  -4  -5  870.01   22.41
  -2  -4  -5  882.97   17.82
  -3  -4  -5  179.14    4.17
   3   4   5  192.73    4.73
  -3  -4  -5  191.73    7.69
  -4  -4  -5 4502.73  103.42
  -4  -4  -5 4761.30   89.39
  -5  -4  -5   52.98    2.37
  -5  -4  -5   48.25    4.95
  -6  -4  -5 1994.95   48.13
  -6  -4  -5 1999.52   39.42
  -7  -4  -5  350.23   12.89
  -7  -4  -5  343.17    8.38
  -8  -4  -5  143.23    4.79
  -8  -4  -5  132.90    8.30
  -9  -4  -5  132.36    8.92
 -10  -4  -5   16.94    5.19
 -11  -4  -5  855.71   27.08
 -12  -4  -5  255.99   14.03
 -13  -4  -5  279.49   15.34
 -14  -4  -5  108.20   10.99
 -13   5   5   39.74    5.43
 -13   5   5   25.42    6.50
 -12   5   5   24.80    4.63
 -12   5   5   24.17    5.80
 -11   5   5  143.49    7.42
 -11   5   5  146.27   10.09
 -10   5   5    5.20    4.59
  -9   5   5  237.24   10.86
  -8   5   5   71.22    6.15
  -7   5   5  539.45   16.33
  -6   5   5    0.58    2.32
  -5   5   5   44.44    3.97
  -4   5   5   -1.27    1.61
  -3   5   5  111.14    5.01
   1  -5  -5  117.46    5.30
   0  -5  -5   65.91    4.07
  -1  -5  -5 8476.82  188.75
   1   5   5 8872.62  156.22
  -2  -5  -5  468.86   13.45
   2   5   5  473.63    9.65
   3   5   5   28.83    1.96
  -3  -5  -5   27.44    3.19
  -4  -5  -5   49.48    1.59
  -4  -5  -5   48.84    5.06
   4   5   5   50.31    2.62
  -5  -5  -5   14.55    3.60
  -5  -5  -5   17.01    1.47
  -6  -5  -5  635.79   13.08
  -6  -5  -5  605.07   18.44
  -7  -5  -5    0.03    3.24
  -7  -5  -5    0.69    1.11
  -8  -5  -5   42.77    2.75
  -8  -5  -5   45.39    5.44
  -9  -5  -5  109.31    7.95
 -10  -5  -5   74.41    7.44
 -12  -5  -5   32.65    7.08
 -13  -5  -5    3.00    5.88
 -14  -5  -5  167.99   13.51
 -13   6   5  176.27    9.39
 -12   6   5   89.00    6.94
 -11   6   5  422.23   13.39
 -11   6   5  415.46   16.62
 -10   6   5  501.58   17.41
 -10   6   5  467.96   14.00
  -9   6   5  215.00   10.60
  -8   6   5   72.09    6.11
  -7   6   5   37.46    4.50
  -6   6   5  530.34   15.59
  -5   6   5  138.42    6.28
  -4   6   5  625.96   16.65
  -3   6   5 3001.75   67.17
   1  -6  -5    3.92    2.01
   0  -6  -5  175.60    6.58
  -1  -6  -5  386.87   11.22
   1   6   5  378.82    8.18
   2   6   5 2151.14   39.54
  -2  -6  -5 2163.28   49.74
   3   6   5 2688.73   49.06
  -3  -6  -5 2684.79   61.71
  -4  -6  -5    9.90    2.96
   4   6   5   17.92    1.73
  -5  -6  -5  560.26   17.01
  -6  -6  -5    2.00    3.14
  -6  -6  -5    5.84    0.98
  -7  -6  -5  679.60   20.59
  -7  -6  -5  687.78   14.32
  -8  -6  -5  118.20    8.21
  -9  -6  -5    1.26    4.15
 -10  -6  -5   51.93    6.91
 -11  -6  -5    4.72    5.18
 -12  -6  -5  228.18   13.50
 -13  -6  -5   65.93    9.16
 -14  -6  -5   14.63    6.90
 -12   7   5    8.95    4.48
 -11   7   5   39.34    5.07
 -10   7   5  542.90   15.58
 -10   7   5  535.33   18.49
  -9   7   5  176.16    7.81
  -9   7   5  174.53    9.62
  -8   7   5    2.74    3.17
  -7   7   5  156.41    7.71
  -6   7   5  645.73   18.13
  -5   7   5   43.03    4.16
  -4   7   5  568.48   15.43
  -3   7   5  193.67    6.97
   1  -7  -5  334.21   10.28
   0  -7  -5 2298.23   52.32
   1   7   5   48.06    2.47
  -1  -7  -5   58.27    4.30
   2   7   5   16.26    1.55
   2   7   5   13.85    1.20
  -2  -7  -5   15.60    2.86
   3   7   5    4.80    1.29
  -3  -7  -5    2.40    2.36
   4   7   5  238.09    6.26
  -4  -7  -5  225.70    9.56
   5   7   5   14.43    1.72
  -5  -7  -5   12.30    3.56
  -6  -7  -5  434.84   14.93
  -7  -7  -5   33.41    4.96
  -8  -7  -5  637.25   20.58
  -9  -7  -5  390.11   15.68
 -10  -7  -5   -6.37    3.72
 -11  -7  -5   27.76    6.43
 -12  -7  -5 1225.59   36.77
 -13  -7  -5   30.63    7.70
 -14  -7  -5   11.31    6.84
 -12   8   5    2.84    4.32
 -11   8   5   67.28    6.11
 -10   8   5   91.78    6.49
  -9   8   5    0.11    2.96
  -8   8   5   19.95    4.00
  -8   8   5   22.19    3.69
  -7   8   5  222.10    9.53
  -7   8   5  235.89    8.34
  -6   8   5  106.80    6.21
  -5   8   5   18.27    2.96
  -4   8   5  219.81    7.88
  -3   8   5    5.28    1.92
   1  -8  -5 1400.12   33.32
   0  -8  -5  563.88   15.08
   0   8   5  531.06   11.89
  -1  -8  -5  684.50   18.26
   1   8   5  706.32   14.46
   1   8   5  717.55   14.61
   2   8   5 1247.98   24.04
   2   8   5 1202.79   23.45
  -2  -8  -5 1187.80   29.79
  -3  -8  -5  796.83   21.81
   3   8   5  822.77   16.51
   4   8   5  206.27    5.95
  -4  -8  -5  217.10    9.21
   5   8   5  391.85    9.46
  -5  -8  -5  393.13   13.72
   6   8   5 1185.82   24.10
  -6  -8  -5 1218.99   31.96
  -7  -8  -5 2767.62   66.21
  -8  -8  -5  162.82    9.44
  -9  -8  -5  778.76   24.50
 -10  -8  -5    2.77    4.36
 -11  -8  -5   70.04    7.85
 -12  -8  -5  563.58   22.25
 -13  -8  -5   -0.69    6.26
 -14  -8  -5   62.55    9.87
 -11   9   5   62.38    6.32
 -10   9   5  206.83    9.37
  -9   9   5  818.76   21.13
  -8   9   5   18.20    3.66
  -7   9   5    5.54    2.88
  -6   9   5  542.06   16.10
  -6   9   5  552.52   14.48
  -5   9   5   31.59    3.28
  -5   9   5   33.67    3.45
  -4   9   5   36.26    3.15
  -4   9   5   38.45    3.65
  -3   9   5   35.87    3.34
  -3   9   5   36.06    3.07
  -2   9   5  356.15    9.18
  -1   9   5 1252.80   25.87
   1  -9  -5 1248.93   30.14
   0  -9  -5  150.71    6.30
   0   9   5  137.25    4.49
   1   9   5 1560.69   29.78
  -1  -9  -5 1536.08   36.77
   1   9   5 1573.99   31.05
  -2  -9  -5  811.63   21.81
   2   9   5  869.19   17.15
   2   9   5  832.80   17.10
   3   9   5  928.96   19.05
   3   9   5  965.12   18.84
  -3  -9  -5  941.38   24.94
   4   9   5   22.50    2.18
  -4  -9  -5   22.74    3.91
   5   9   5  221.57    6.54
  -5  -9  -5  218.96    9.95
   6   9   5  121.06    4.73
  -6  -9  -5  139.50    8.31
  -7  -9  -5    2.45    3.73
   7   9   5    3.48    1.93
  -8  -9  -5   -4.28    3.50
  -9  -9  -5   65.30    7.35
 -10  -9  -5  235.96   12.97
 -11  -9  -5 1183.34   35.35
 -12  -9  -5   47.29    8.22
 -13  -9  -5  206.31   14.22
 -14  -9  -5   -6.02    6.93
 -11  10   5   77.80    7.04
 -10  10   5   37.38    5.27
  -9  10   5  359.08   12.38
  -8  10   5   71.75    5.59
  -7  10   5    2.80    2.89
  -6  10   5  200.49    7.79
  -5  10   5  229.47    8.05
  -4  10   5   16.53    2.66
  -3  10   5   34.31    3.01
  -3  10   5   36.15    3.55
  -1  10   5  814.68   17.61
   1 -10  -5  788.52   20.51
   0  10   5  423.54   10.14
   0 -10  -5  439.26   12.63
   1  10   5 1153.08   23.37
   1  10   5 1130.83   22.72
  -1 -10  -5 1138.36   28.03
   2  10   5  708.16   14.70
   2  10   5  694.98   14.92
  -2 -10  -5  689.01   18.88
   3  10   5 1031.97   21.21
  -3 -10  -5 1040.03   27.39
   3  10   5 1084.64   21.11
   4  10   5  421.45   10.23
  -4 -10  -5  443.81   14.67
  -5 -10  -5    3.84    3.32
   5  10   5    9.99    1.96
   6  10   5   76.79    3.88
  -6 -10  -5   71.74    6.88
   7  10   5   79.61    4.32
  -7 -10  -5   75.49    7.30
  -8 -10  -5   69.63    7.13
  -9 -10  -5   28.58    5.99
 -10 -10  -5   62.86    7.30
 -11 -10  -5  223.58   13.52
 -12 -10  -5   34.72    7.80
 -13 -10  -5   52.27    8.40
 -14 -10  -5  124.77   12.39
 -10  11   5   25.10    4.98
  -9  11   5    7.96    3.82
  -8  11   5  396.33   12.83
  -7  11   5   16.74    3.65
  -6  11   5  140.23    6.77
  -5  11   5    7.99    2.88
  -4  11   5   41.86    3.79
  -3  11   5   40.49    3.69
  -2  11   5  730.83   16.92
  -2  11   5  740.91   18.63
  -1  11   5   21.92    2.37
   1 -11  -5   24.24    2.95
   0 -11  -5   95.72    5.19
   0  11   5   78.78    3.78
  -1 -11  -5  383.54   11.84
   1  11   5  385.86    9.27
   1  11   5  381.22    9.57
   2  11   5  172.65    5.00
  -2 -11  -5  183.85    7.84
   2  11   5  172.11    5.75
  -3 -11  -5  225.31    9.35
   3  11   5  241.20    6.96
   3  11   5  239.75    5.82
   4  11   5    6.51    1.87
  -4 -11  -5    6.11    3.55
  -5 -11  -5  381.62   14.12
   5  11   5  383.69    9.88
   6  11   5  149.02    5.53
  -6 -11  -5  144.76    8.82
  -7 -11  -5  104.48    8.50
   7  11   5  115.60    5.03
   8  11   5 1159.43   24.60
  -8 -11  -5 1152.81   32.92
  -9 -11  -5    7.09    4.99
 -10 -11  -5   -5.99    4.67
 -11 -11  -5  119.89   10.11
 -12 -11  -5  120.32   11.35
 -13 -11  -5   -6.97    5.95
 -14 -11  -5   55.08    9.79
 -10  12   5   10.05    4.50
  -9  12   5   30.03    4.81
  -8  12   5   31.35    4.67
  -7  12   5   59.74    5.43
  -6  12   5  535.73   15.00
  -5  12   5   36.18    4.08
  -4  12   5    8.08    2.81
  -3  12   5    1.16    2.18
  -2  12   5  523.66   13.14
  -1  12   5   30.47    2.81
   0  12   5   66.48    3.70
   0 -12  -5   66.17    4.71
   1  12   5  187.38    5.76
   1  12   5  178.43    6.13
  -1 -12  -5  190.58    7.47
   2  12   5    9.92    2.03
   2  12   5   11.27    1.69
  -2 -12  -5    9.67    3.13
  -3 -12  -5   35.05    4.37
   3  12   5   37.73    3.15
   4  12   5  233.22    7.19
  -4 -12  -5  228.49   10.07
  -5 -12  -5  338.05   13.46
   5  12   5  351.70    9.44
  -6 -12  -5   65.46    6.50
   6  12   5   49.80    3.82
  -7 -12  -5   32.16    5.72
   7  12   5   39.42    3.48
   8  12   5   24.42    3.16
  -8 -12  -5   30.95    6.01
  -9 -12  -5  119.36    9.81
 -10 -12  -5  271.26   14.19
 -11 -12  -5  617.68   23.40
 -12 -12  -5   -8.56    5.37
 -13 -12  -5   52.07    9.34
 -14 -12  -5   15.03    8.01
  -9  13   5  335.14   12.64
  -8  13   5   -2.27    3.40
  -7  13   5   60.75    5.51
  -6  13   5  341.29   11.40
  -5  13   5  118.19    6.42
  -4  13   5   36.01    3.86
  -3  13   5   28.51    3.44
  -2  13   5   -1.42    2.08
  -1  13   5  299.88    8.79
   0  13   5  948.36   20.86
   1  13   5  654.06   14.78
   1  13   5  633.97   14.85
   2  13   5  760.10   16.53
   2  13   5  747.01   16.86
  -2 -13  -5  762.05   20.60
  -3 -13  -5  752.97   21.17
  -4 -13  -5   40.43    4.92
   4  13   5   39.27    3.27
   5  13   5  140.41    5.73
  -5 -13  -5  132.06    8.54
   6  13   5  306.80    9.31
  -6 -13  -5  334.68   13.66
  -7 -13  -5  107.83    8.76
   7  13   5  103.42    5.11
  -8 -13  -5   50.74    6.85
   8  13   5   44.14    3.85
  -9 -13  -5  106.98    9.48
   9  13   5  100.71    5.62
 -10 -13  -5   10.00    6.02
 -11 -13  -5    8.38    5.92
 -12 -13  -5    1.36    6.05
 -13 -13  -5   55.92    9.53
  -9  14   5  608.60   18.57
  -8  14   5   71.04    6.40
  -7  14   5  182.47    8.76
  -6  14   5    8.33    3.48
  -5  14   5  364.76   11.77
  -4  14   5    5.58    3.00
  -3  14   5   21.96    3.37
  -2  14   5  158.56    6.55
  -1  14   5   21.26    3.04
   0  14   5  149.39    5.82
   1  14   5  548.57   13.19
   1  14   5  545.04   13.46
   2  14   5   42.68    3.59
   3  14   5  177.52    6.57
  -3 -14  -5  161.43    8.26
  -4 -14  -5    8.85    3.97
   4  14   5    7.31    2.45
   5  14   5  596.27   14.56
  -5 -14  -5  599.27   19.53
  -7 -14  -5  205.25   11.76
   7  14   5  221.07    7.78
  -8 -14  -5  113.12    9.43
   8  14   5  123.65    6.00
   9  14   5  468.94   13.02
  -9 -14  -5  468.30   18.73
 -10 -14  -5    6.99    5.72
 -11 -14  -5   16.88    6.83
 -12 -14  -5   89.69   10.42
 -13 -14  -5   24.94    8.14
  -8  15   5   81.17    6.91
  -7  15   5  165.82    8.66
  -6  15   5   11.70    3.94
  -5  15   5   -3.68    2.94
  -4  15   5   18.56    3.85
  -3  15   5   70.83    5.14
  -2  15   5   54.61    4.52
  -1  15   5  252.62    8.40
   0  15   5  371.49   10.40
   1  15   5   45.95    3.76
   2  15   5   83.94    4.88
   3  15   5  157.80    6.50
   4  15   5  590.06   14.61
  -5 -15  -5  178.54   10.08
   5  15   5  164.19    6.72
  -6 -15  -5  251.67   12.17
   6  15   5  241.81    8.40
  -7 -15  -5  133.58    9.97
   7  15   5  115.87    5.74
  -8 -15  -5  481.70   18.70
   8  15   5  466.37   12.90
   9  15   5  385.03   11.45
  -9 -15  -5  343.57   16.18
  10  15   5    2.35    2.82
 -10 -15  -5   11.60    5.73
 -11 -15  -5  101.15   10.47
 -12 -15  -5   -5.92    6.06
 -13 -15  -5  154.56   14.26
  -7  16   5   -2.10    3.66
  -6  16   5   13.35    4.15
  -5  16   5   47.53    5.19
  -4  16   5   50.28    4.95
  -3  16   5  188.44    8.00
  -2  16   5   15.39    3.21
  -1  16   5   29.55    3.53
   0  16   5   30.96    3.62
   0  16   5   39.53    3.64
   1  16   5   46.32    4.01
   2  16   5  569.46   14.46
   3  16   5   17.58    3.11
   4  16   5   -2.61    2.22
   5  16   5  241.08    8.45
   6  16   5   86.45    5.25
   7  16   5    5.12    2.81
  -7 -16  -5    4.03    4.89
   8  16   5  189.66    7.64
  -8 -16  -5  197.40   12.21
  -9 -16  -5   33.04    7.12
   9  16   5   49.46    4.48
 -10 -16  -5   14.04    6.31
  10  16   5   16.28    3.30
 -11 -16  -5   14.65    6.94
 -12 -16  -5  147.54   12.64
 -13 -16  -5   14.49    8.06
  -7  17   5  101.35    7.77
  -6  17   5  156.72    8.49
  -5  17   5   47.21    5.28
  -4  17   5  235.96    9.57
  -3  17   5  123.20    6.81
  -2  17   5   82.29    5.61
  -1  17   5  374.60   11.34
   0  17   5   42.80    4.26
   1  17   5  510.91   13.74
   2  17   5  994.77   22.47
   3  17   5  396.12   11.60
   4  17   5   35.79    3.92
   5  17   5   74.74    5.27
   6  17   5   25.91    3.74
   7  17   5   -2.29    2.58
   8  17   5    2.93    2.82
   9  17   5   88.78    5.94
  -9 -17  -5   91.95    9.51
 -10 -17  -5    4.37    5.93
  10  17   5    5.25    3.13
 -11 -17  -5   11.95    7.42
 -12 -17  -5   19.99    8.12
  -6  18   5  344.33   13.06
  -5  18   5   33.97    5.03
  -4  18   5   15.80    4.18
  -3  18   5  203.75    8.84
  -2  18   5    6.44    3.44
   0  18   5   25.13    3.47
   1  18   5  138.56    6.67
   2  18   5  155.58    7.14
   3  18   5  876.01   20.71
   4  18   5  535.77   14.60
   5  18   5  419.43   12.52
   6  18   5    1.64    2.89
   7  18   5    7.59    3.18
   8  18   5    6.27    3.27
   9  18   5  642.56   17.28
  10  18   5    3.85    3.31
  11  18   5    1.37    3.39
 -12 -18  -5   52.79    9.92
  -5  19   5    2.89    4.10
  -4  19   5  179.09    8.93
  -3  19   5   37.84    4.84
  -1  19   5  235.64    9.29
   0  19   5  256.46    9.53
   1  19   5   94.72    5.89
   2  19   5   42.80    4.44
   3  19   5  235.99    8.94
   4  19   5    6.04    3.22
   5  19   5  237.21    9.25
   6  19   5  282.03   10.16
   7  19   5  275.23   10.19
   8  19   5   34.66    4.57
   9  19   5   28.68    4.30
  10  19   5   75.30    6.16
  -4  20   5   16.98    4.53
  -1  20   5  396.98   12.90
   0  20   5   32.95    4.30
   1  20   5  112.61    6.55
   2  20   5    8.52    3.35
   3  20   5   29.77    4.02
   4  20   5  124.04    6.88
   5  20   5   53.75    5.17
   6  20   5    1.26    3.21
   7  20   5   82.84    6.16
   8  20   5   31.80    4.60
   9  20   5  478.40   14.81
  -2  21   5    1.85    3.89
  -1  21   5   14.07    4.10
   0  21   5  154.71    7.98
   1  21   5  102.40    6.65
   2  21   5   87.08    6.16
   3  21   5   79.95    5.93
   4  21   5   -1.58    3.11
   5  21   5   26.85    4.45
   6  21   5  139.28    7.67
   7  21   5   -2.17    3.17
   8  21   5   58.81    5.61
   1  22   5  166.20    8.42
   2  22   5  114.28    7.24
   3  22   5  227.99    9.69
   4  22   5   29.53    4.66
   5  22   5   32.82    4.91
   6  22   5  143.07    8.10
   7  19  -6   62.88    5.77
   6  19  -6    5.32    3.81
   5  19  -6   17.63    4.46
   4  19  -6   29.20    4.80
   3  19  -6   -7.45    3.35
   2  19  -6   24.59    4.63
   1  19  -6   25.28    4.85
   0  19  -6   22.12    4.85
  -1  19  -6  286.53   11.57
   9  18  -6   73.63    6.25
   8  18  -6   85.70    6.86
   7  18  -6   49.58    5.13
   6  18  -6   36.50    4.76
   5  18  -6   66.47    5.61
   4  18  -6   18.48    4.27
   3  18  -6  162.13    7.90
   2  18  -6   48.15    5.28
   1  18  -6  265.38   10.36
   0  18  -6   43.08    5.04
   0  18  -6   37.74    5.10
  -1  18  -6   65.38    6.10
  -1  18  -6   74.55    6.39
  -2  18  -6   19.04    4.99
  -2  18  -6   16.95    4.34
  10  17  -6   -6.32    3.26
   9  17  -6  756.99   19.81
   8  17  -6   33.91    4.78
   7  17  -6   -1.30    3.36
   6  17  -6    2.25    3.36
   5  17  -6   19.04    3.81
   4  17  -6   49.45    4.88
   3  17  -6  373.94   11.88
   2  17  -6   76.93    5.98
   1  17  -6   -0.79    3.32
   1  17  -6    3.02    3.10
   0  17  -6  226.60    9.26
   0  17  -6  226.19    9.54
  -1  17  -6   55.64    5.46
  -1  17  -6   57.13    5.56
  -2  17  -6    5.19    3.45
  -3  17  -6   63.31    6.11
  -4  17  -6  475.11   15.70
  10  16  -6  173.59    8.45
   9  16  -6    7.86    3.45
   8  16  -6   77.79    5.80
   7  16  -6    2.32    2.98
   6  16  -6   -3.13    2.69
   5  16  -6    8.88    3.37
   4  16  -6  122.46    6.46
   3  16  -6   33.61    4.04
   2  16  -6   27.31    4.09
   2  16  -6   28.94    4.05
   1  16  -6  129.95    6.87
   1  16  -6  134.75    7.09
   0  16  -6  105.03    6.56
   0  16  -6  103.50    6.40
  -1  16  -6   11.15    3.69
  -1  16  -6   17.27    3.72
  -2  16  -6    7.76    3.54
  -3  16  -6   49.89    5.30
  -4  16  -6   39.45    5.13
  -5  16  -6    9.80    4.00
  10  15  -6  227.82    9.41
   9  15  -6  121.86    6.94
   8  15  -6  152.40    7.24
   7  15  -6   63.06    5.35
   6  15  -6   76.12    5.60
   5  15  -6   17.44    3.32
   4  15  -6   66.52    4.95
   3  15  -6    0.67    2.59
   3  15  -6   -2.29    2.68
   2  15  -6   51.75    4.71
   2  15  -6   48.00    4.62
   1  15  -6   91.17    5.73
   1  15  -6   82.20    5.75
   0  15  -6   13.85    3.48
   0  15  -6   21.26    3.64
  -1  15  -6   27.59    4.12
  -2  15  -6    2.58    3.00
  -3  15  -6   37.67    4.60
  -4  15  -6   -4.27    2.88
  -5  15  -6   12.44    4.16
  -6  15  -6   10.89    4.51
   9  14  -6   43.08    4.40
   8  14  -6  214.98    8.43
   7  14  -6    2.49    2.80
   6  14  -6  977.97   22.21
   5  14  -6   10.10    3.03
   4  14  -6  727.77   18.30
   4  14  -6  703.97   17.21
   3  14  -6  263.32    9.46
   3  14  -6  282.02    9.09
   2  14  -6  200.30    7.99
   2  14  -6  195.16    7.73
   1  14  -6   13.08    3.13
   1  14  -6   15.04    3.27
   0  14  -6  182.98    7.38
   0  14  -6  165.25    7.58
  -1  14  -6  178.70    7.82
  -2  14  -6    7.16    3.07
  -3  14  -6   66.58    5.49
  -4  14  -6   46.94    4.98
  -5  14  -6  467.84   14.97
  -6  14  -6   -2.83    3.54
  -7  14  -6   72.63    6.73
 -12 -13   6    7.55    6.05
   9  13  -6   -0.70    2.47
   8  13  -6    2.25    2.77
   7  13  -6   -7.69    2.27
   6  13  -6  185.26    7.30
   5  13  -6  401.74   11.29
   4  13  -6  278.84    9.38
   4  13  -6  269.83    8.84
   3  13  -6 1339.56   27.98
   3  13  -6 1347.81   30.11
   2  13  -6   87.11    5.38
   2  13  -6   71.47    5.04
   1  13  -6  116.56    5.90
   1  13  -6  130.24    6.37
   0  13  -6   44.91    3.97
   0  13  -6   37.57    3.98
  -1  13  -6   27.15    3.76
  -2  13  -6   19.98    3.54
  -3  13  -6   60.67    5.11
  -4  13  -6  675.61   18.41
  -5  13  -6  229.44    9.68
  -6  13  -6    3.18    3.57
  -7  13  -6  161.55    8.83
 -13 -12   6   -0.32    6.13
 -12 -12   6   52.43    8.27
 -11 -12   6   50.94    7.49
 -10 -12   6  258.52   13.42
   9  12  -6   19.52    3.35
  -9 -12   6   15.48    4.96
   8  12  -6  467.61   12.75
   7  12  -6   17.90    3.22
   6  12  -6  124.37    5.80
   5  12  -6  257.77    8.27
   5  12  -6  251.91    8.67
   4  12  -6   40.56    3.51
   4  12  -6   44.98    3.85
   3  12  -6   98.49    5.50
   3  12  -6  104.21    5.32
   2  12  -6   88.73    5.18
   2  12  -6   92.91    5.11
   1  12  -6  181.61    7.28
   1  12  -6  185.86    7.06
   0  12  -6  169.99    7.16
  -1  12  -6   -3.61    2.16
  -2  12  -6    1.97    2.55
  -3  12  -6    8.97    3.10
  -4  12  -6  304.43   10.70
  -5  12  -6  285.69   10.47
  -6  12  -6    9.77    3.53
  -7  12  -6  607.73   17.81
  -8  12  -6   51.73    5.91
 -13 -11   6  154.21   12.16
 -12 -11   6   92.11    9.39
 -11 -11   6   34.29    6.56
 -10 -11   6   77.96    8.20
  -9 -11   6   19.09    5.37
   8  11  -6    8.78    2.60
  -8 -11   6   14.59    4.57
   7  11  -6   46.08    3.82
  -7 -11   6   62.31    6.42
   6  11  -6   58.77    4.36
   6  11  -6   48.76    4.14
   5  11  -6  360.19    9.98
   5  11  -6  371.78   10.68
   4  11  -6  113.04    5.50
   4  11  -6  105.57    5.03
   3  11  -6    5.46    2.34
   3  11  -6    2.47    2.27
   2  11  -6  256.36    8.58
   2  11  -6  261.39    8.14
   1  11  -6   43.38    3.57
   1  11  -6   46.70    3.92
   0  11  -6  337.16   10.35
  -1  11  -6  101.04    5.54
  -2  11  -6  164.91    7.01
  -3  11  -6  309.61   10.25
  -4  11  -6   16.06    3.34
  -5  11  -6   66.83    5.35
  -6  11  -6  388.91   12.66
  -7  11  -6  152.22    7.96
  -8  11  -6   -4.21    3.28
  -9  11  -6    7.01    4.26
 -13 -10   6  134.39   11.57
 -12 -10   6   32.24    6.89
 -11 -10   6  179.94   11.54
 -10 -10   6 1275.97   36.20
  -9 -10   6   -0.81    4.50
   8  10  -6  213.73    7.54
  -8 -10   6  208.79   10.63
   6  10  -6  199.17    6.97
  -6 -10   6  202.73    9.14
   6  10  -6  196.58    7.19
  -5 -10   6   79.93    5.86
   5  10  -6   79.38    4.33
   5  10  -6   77.64    4.68
   4  10  -6   79.27    4.25
   4  10  -6   88.39    4.84
   2  10  -6  702.60   15.58
   2  10  -6  691.49   16.90
   1  10  -6 1537.81   33.41
   1  10  -6 1578.37   30.87
   0  10  -6  137.70    6.13
  -1  10  -6  504.42   13.45
  -2  10  -6    3.27    2.39
  -3  10  -6   -3.26    2.17
  -4  10  -6  328.34   10.58
  -5  10  -6  416.58   12.62
  -6  10  -6  148.25    7.30
  -7  10  -6   16.25    3.87
  -8  10  -6  265.98   10.59
  -9  10  -6    9.00    4.10
 -10  10  -6  130.68    8.39
 -13  -9   6   -5.00    5.48
 -12  -9   6   94.09    9.64
 -11  -9   6   72.03    7.99
 -10  -9   6  312.00   14.34
  -9  -9   6  157.91    9.88
  -8  -9   6  348.08   13.64
  -7  -9   6  955.04   26.51
   7   9  -6  948.19   20.60
   7   9  -6  970.25   21.83
  -6  -9   6  566.37   17.49
   6   9  -6  603.51   14.64
   6   9  -6  580.28   13.68
  -5  -9   6  276.47   10.12
   5   9  -6  272.39    8.47
   5   9  -6  276.72    7.89
   4   9  -6  895.86   20.67
  -4  -9   6  913.25   23.20
   4   9  -6  923.03   19.16
   3   9  -6  517.76   13.22
   3   9  -6  530.57   12.19
   2   9  -6  131.97    5.50
   2   9  -6  128.72    5.11
   0   9  -6    4.46    1.98
  -1   9  -6   11.19    2.41
  -2   9  -6  394.80   11.16
  -3   9  -6  166.01    6.85
  -4   9  -6  140.82    6.50
  -5   9  -6   -2.50    2.47
  -6   9  -6   24.06    3.74
  -7   9  -6   65.89    5.37
  -8   9  -6  378.09   12.74
  -9   9  -6   -0.82    3.38
 -10   9  -6  330.74   12.63
 -13  -8   6   41.83    7.67
 -12  -8   6   41.30    7.11
 -11  -8   6   14.24    5.46
 -10  -8   6   79.39    7.89
  -9  -8   6    5.80    4.22
  -8  -8   6   39.20    5.25
  -7  -8   6   21.38    4.49
   7   8  -6   17.44    2.74
   6   8  -6   13.66    2.22
  -6  -8   6   11.89    3.57
   6   8  -6   14.80    2.47
  -5  -8   6  268.21    9.84
   5   8  -6  279.44    7.72
   5   8  -6  263.71    8.21
  -4  -8   6  655.11   17.54
   4   8  -6  667.29   14.24
   4   8  -6  615.59   15.33
   3   8  -6  183.90    6.38
   3   8  -6  187.85    5.73
  -3  -8   6  187.53    6.92
   2   8  -6  649.08   15.17
   2   8  -6  622.13   13.64
  -2  -8   6  614.31   15.67
   1   8  -6   70.72    3.71
   1   8  -6   66.56    4.00
   0   8  -6  238.13    7.65
  -1   8  -6  450.73   11.87
  -2   8  -6    6.10    2.07
  -3   8  -6  534.96   13.90
  -4   8  -6  109.68    5.58
  -5   8  -6  436.09   12.57
  -6   8  -6   38.71    4.15
  -7   8  -6   -1.58    2.69
  -8   8  -6  126.44    7.03
  -9   8  -6   14.43    3.94
 -10   8  -6  147.18    8.22
 -11   8  -6   11.22    4.44
 -13  -7   6  443.08   19.49
 -12  -7   6   32.00    6.74
 -11  -7   6  136.18   10.03
 -10  -7   6  140.98    9.51
  -9  -7   6    1.14    3.90
  -8  -7   6  151.67    8.76
  -7  -7   6   60.03    6.11
  -6  -7   6  767.11   21.22
   6   7  -6  755.33   17.56
   6   7  -6  756.84   16.37
  -5  -7   6  373.56   11.89
   5   7  -6  363.89    9.87
   5   7  -6  358.41    9.10
   4   7  -6 1396.09   26.91
  -4  -7   6 1373.82   33.14
   4   7  -6 1369.08   29.20
   3   7  -6  297.54    7.54
   3   7  -6  298.99    8.40
  -3  -7   6  282.87    9.12
  -2  -7   6  255.43    7.78
   2   7  -6  257.85    6.74
   2   7  -6  253.80    7.67
  -1  -7   6  412.92   10.43
   1   7  -6  410.38    9.53
   1   7  -6  402.56   10.72
   0   7  -6  339.91    9.44
  -1   7  -6 1097.23   24.04
  -2   7  -6  202.21    6.93
  -3   7  -6    8.35    2.15
  -4   7  -6   16.23    2.70
  -5   7  -6  784.34   19.01
  -6   7  -6    7.48    2.71
  -7   7  -6   62.14    5.05
  -8   7  -6   17.44    3.72
  -9   7  -6   86.76    6.24
 -10   7  -6   88.30    6.54
 -11   7  -6  207.63    9.81
 -12   7  -6   84.75    7.37
 -13  -6   6   50.05    7.87
 -12  -6   6  141.51   10.77
 -11  -6   6    1.69    4.60
 -10  -6   6  248.09   12.13
  -9  -6   6   63.51    6.38
  -8  -6   6  503.18   16.95
  -7  -6   6   70.14    6.15
   6   6  -6  496.13   11.55
   6   6  -6  499.31   12.41
  -6  -6   6  481.32   15.15
   5   6  -6  219.16    6.89
   5   6  -6  216.57    6.21
  -5  -6   6  223.74    8.60
   4   6  -6  842.21   17.15
   4   6  -6  840.45   18.81
  -4  -6   6  840.68   21.52
   3   6  -6   85.22    3.40
   3   6  -6   89.13    4.14
  -3  -6   6   82.70    4.54
   2   6  -6 1325.85   28.17
   2   6  -6 1349.39   25.61
  -2  -6   6 1334.16   30.94
  -1  -6   6  903.15   21.27
   1   6  -6  910.49   18.12
   1   6  -6  918.83   20.15
   0  -6   6  546.55   12.79
   0   6  -6  527.39   13.05
   1  -6   6 2596.09   57.06
  -1   6  -6 2590.81   52.26
  -2   6  -6    5.78    1.93
  -3   6  -6  876.10   19.91
  -4   6  -6  195.90    6.93
  -6   6  -6   22.52    3.28
  -7   6  -6 1240.44   28.30
  -8   6  -6  205.79    8.45
  -9   6  -6  294.51   10.60
 -10   6  -6    1.19    3.23
 -11   6  -6  379.54   13.16
 -12   6  -6    2.79    3.86
 -14  -5   6  308.04   16.58
 -13  -5   6  326.55   16.18
 -12  -5   6   -4.96    4.68
 -11  -5   6  311.08   14.33
 -10  -5   6  128.70    9.04
  -9  -5   6   10.75    4.38
  -8  -5   6  232.15   10.62
  -7  -5   6  227.17    9.86
  -6  -5   6  119.22    6.65
   5   5  -6  532.41   11.73
   5   5  -6  524.27   12.83
  -5  -5   6  550.24   15.51
   4   5  -6  100.77    3.75
   4   5  -6  103.96    4.42
  -4  -5   6   99.17    5.40
  -3  -5   6  369.65   10.90
   3   5  -6  386.70    8.57
   3   5  -6  378.53    9.75
   2   5  -6   86.60    3.23
   2   5  -6   90.43    4.05
  -2  -5   6   88.10    4.10
   1   5  -6  235.40    5.93
  -1  -5   6  235.05    6.88
   1   5  -6  240.22    7.03
   0  -5   6  178.93    5.31
   0   5  -6  187.52    5.99
  -1   5  -6   92.82    4.23
  -1   5  -6   99.27    3.98
  -2   5  -6  138.81    4.68
  -2   5  -6  128.63    5.06
  -3   5  -6  136.09    5.28
  -3   5  -6  133.44    4.98
  -4   5  -6   54.57    3.93
  -4   5  -6   48.63    3.59
  -5   5  -6   69.64    4.43
  -6   5  -6   41.19    3.80
  -7   5  -6   30.34    3.61
  -8   5  -6  642.13   16.89
  -9   5  -6   47.14    4.59
 -10   5  -6   22.47    4.01
 -11   5  -6  762.73   20.51
 -12   5  -6   19.37    4.50
 -13   5  -6   39.58    5.76
 -14  -4   6  329.19   17.01
 -13  -4   6  145.94   10.76
 -12  -4   6   59.29    7.19
 -11  -4   6   56.08    6.54
 -10  -4   6   -2.66    3.74
  -9  -4   6  171.54    9.61
  -8  -4   6  292.35   11.66
  -7  -4   6    8.02    2.96
  -6  -4   6 1740.47   42.00
   5   4  -6   18.51    2.15
  -5  -4   6   17.49    2.96
   4   4  -6   28.63    2.42
   4   4  -6   30.69    2.28
  -4  -4   6   29.24    3.07
  -3  -4   6 1252.97   29.74
   3   4  -6 1229.76   26.21
   3   4  -6 1278.10   23.78
   2   4  -6  221.11    5.31
  -2  -4   6  209.62    6.84
   2   4  -6  209.90    6.30
  -1  -4   6  648.67   15.92
   1   4  -6  655.19   13.01
   1   4  -6  663.78   14.84
   0   4  -6   28.72    2.32
   0  -4   6   26.13    2.13
  -1   4  -6  803.03   19.18
  -1   4  -6  806.10   17.73
  -2   4  -6  665.14   16.02
  -2   4  -6  646.95   15.00
  -3   4  -6  581.88   14.82
  -3   4  -6  570.61   13.65
  -4   4  -6   19.50    2.36
  -4   4  -6   17.88    2.86
  -5   4  -6  433.88   13.31
  -5   4  -6  453.11   11.70
  -6   4  -6  253.84    8.36
  -6   4  -6  265.64   10.19
  -7   4  -6    4.29    2.54
  -8   4  -6  225.76    8.36
 -10   4  -6    1.70    2.80
 -11   4  -6  113.03    6.89
 -12   4  -6  234.39    9.99
 -13   4  -6  155.71    8.70
 -14  -3   6   -0.13    5.72
 -13  -3   6  366.47   17.00
 -12  -3   6  145.04   10.61
 -11  -3   6  214.07   11.72
 -10  -3   6   23.47    5.23
  -9  -3   6    3.98    3.83
  -8  -3   6  266.36   11.28
  -7  -3   6  255.92   10.13
  -6  -3   6  280.69   10.14
  -5  -3   6  221.88    8.26
  -4  -3   6  359.19   11.05
   4   3  -6  361.42    9.23
   3   3  -6   11.10    1.31
  -3  -3   6   11.83    2.07
   3   3  -6   10.01    1.72
   2   3  -6   97.06    3.86
   2   3  -6   94.95    2.91
  -2  -3   6   87.87    4.25
  -1  -3   6  660.56   16.33
   1   3  -6  686.51   13.06
   1   3  -6  672.46   14.94
   0   3  -6 1107.15   23.25
   0   3  -6 1109.64   26.00
  -1   3  -6 1084.35   24.53
  -1   3  -6 1010.56   22.08
  -2   3  -6   87.47    4.16
  -2   3  -6   81.34    3.69
  -3   3  -6  304.46    8.27
  -3   3  -6  304.48    9.28
  -4   3  -6    4.03    1.68
  -4   3  -6    6.41    2.37
  -5   3  -6 1956.28   40.88
  -5   3  -6 2024.54   46.79
  -6   3  -6   18.61    3.62
  -6   3  -6   21.21    2.69
  -7   3  -6    1.65    3.47
  -7   3  -6   -3.51    1.97
  -8   3  -6  579.14   18.28
  -8   3  -6  544.79   14.67
  -9   3  -6  156.27    7.06
 -10   3  -6   -1.91    2.58
 -11   3  -6  326.61   11.19
 -12   3  -6   34.26    4.70
 -13   3  -6   14.51    4.20
 -14  -2   6   29.26    7.16
 -13  -2   6   35.04    6.60
 -12  -2   6  136.11   10.26
 -11  -2   6  256.87   12.45
 -10  -2   6    6.35    3.78
  -9  -2   6   62.17    6.09
  -8  -2   6  215.60   10.00
  -7  -2   6  327.88   11.90
  -5  -2   6   57.67    4.20
  -4  -2   6  270.63    8.97
  -3  -2   6    7.39    1.95
   3   2  -6    8.51    1.50
   3   2  -6    7.94    1.16
  -2  -2   6    5.31    1.52
   2   2  -6    6.79    0.93
   2   2  -6    6.77    1.33
  -1  -2   6   51.26    3.01
   1   2  -6   49.14    2.72
   1   2  -6   52.51    1.83
   0   2  -6 1217.46   24.63
   0   2  -6 1162.74   27.67
  -1   2  -6  482.68   11.09
  -1   2  -6  474.33   12.43
  -2   2  -6   68.44    3.89
  -2   2  -6   70.40    3.24
  -3   2  -6  116.27    4.39
  -3   2  -6  121.00    5.61
  -4   2  -6   27.63    2.36
  -4   2  -6   29.69    3.38
  -5   2  -6 1008.48   22.13
  -5   2  -6 1026.72   26.03
  -6   2  -6   57.79    5.40
  -6   2  -6   56.94    3.83
  -7   2  -6  282.69   11.00
  -7   2  -6  260.83    8.39
  -8   2  -6 1010.81   23.31
  -8   2  -6 1035.98   28.29
  -9   2  -6  289.29    9.62
  -9   2  -6  301.48   13.03
 -10   2  -6   59.11    6.92
 -10   2  -6   47.55    4.42
 -11   2  -6   44.62    4.56
 -12   2  -6    3.10    3.23
 -14  -1   6   -0.16    5.62
 -13  -1   6   29.60    6.75
 -12  -1   6    2.26    4.99
 -11  -1   6   -2.17    4.28
 -10  -1   6   59.66    6.51
  -9  -1   6  218.12   10.56
  -8  -1   6  119.14    7.22
  -7  -1   6  169.01    8.17
  -6  -1   6 1355.73   33.57
  -5  -1   6  762.53   20.27
  -4  -1   6  209.30    7.50
   3   1  -6   46.95    2.76
  -3  -1   6   42.66    3.43
   2   1  -6  158.34    3.57
   2   1  -6  134.94    4.63
  -2  -1   6  161.45    5.60
   1   1  -6    5.65    0.66
   1   1  -6    3.99    1.16
   1   1  -6    1.73    1.76
   0   1  -6 1333.19   27.05
   0   1  -6 1326.69   31.00
  -1   1  -6  258.14    7.66
  -1   1  -6  236.85    6.39
  -2   1  -6 2881.65   64.88
  -2   1  -6 2942.73   57.25
  -3   1  -6  675.90   14.86
  -3   1  -6  673.65   17.61
  -4   1  -6  543.44   15.31
  -4   1  -6  547.34   12.63
  -5   1  -6   40.10    2.99
  -5   1  -6   38.50    4.20
  -6   1  -6  300.31    8.46
  -6   1  -6  303.96   11.02
  -7   1  -6   20.74    4.27
  -7   1  -6   13.13    2.38
  -8   1  -6  728.12   17.31
  -8   1  -6  710.17   21.54
  -9   1  -6  143.59    6.33
  -9   1  -6  145.42    9.15
 -10   1  -6  474.75   13.27
 -10   1  -6  471.62   17.54
 -11   1  -6   -1.64    4.58
 -11   1  -6    3.57    2.77
 -12   1  -6   54.10    5.03
 -12   1  -6   53.06    7.60
 -14   0   6    1.88    5.88
 -13   0   6   29.21    6.25
 -12   0   6    5.27    5.14
 -11   0   6    4.52    4.20
 -10   0   6   57.00    6.41
  -9   0   6  623.96   19.67
  -8   0   6  177.32    8.98
  -7   0   6 1985.03   47.78
  -6   0   6 1384.91   34.27
  -5   0   6  540.50   15.42
  -4   0   6   36.87    3.31
  -3   0   6   59.63    3.60
  -2   0   6  263.74    7.98
   2   0  -6  267.74    6.85
   1   0  -6  618.24   16.27
   1   0  -6  644.55   13.72
   0   0  -6  323.10    9.39
   0   0  -6  317.11    7.64
  -1   0  -6  578.77   12.45
  -1   0  -6  562.38   14.67
  -2   0  -6  110.08    3.61
  -2   0  -6  101.18    4.95
  -3   0  -6  331.26   10.48
  -3   0  -6  349.78    8.35
  -4   0  -6  125.99    4.38
  -4   0  -6  118.80    6.28
  -5   0  -6  246.22    6.86
  -5   0  -6  229.96    9.17
  -6   0  -6   55.12    5.31
  -6   0  -6   52.14    3.37
  -7   0  -6   41.38    3.35
  -7   0  -6   39.27    4.70
  -8   0  -6  526.30   17.28
  -8   0  -6  512.14   13.09
  -9   0  -6   15.87    4.72
  -9   0  -6   19.66    2.90
 -10   0  -6  252.85   12.47
 -10   0  -6  262.38    8.82
 -11   0  -6    0.72    2.59
 -11   0  -6   -6.17    4.31
 -12   0  -6  325.54   15.66
 -13   0  -6   41.32    7.76
 -14   1   6   32.68    7.49
 -13   1   6  189.88   12.31
 -12   1   6   71.59    7.92
 -11   1   6  201.44   11.35
 -10   1   6  251.94   11.86
  -9   1   6  704.06   21.54
  -8   1   6   17.55    3.61
  -7   1   6 2268.92   53.82
  -6   1   6  556.59   16.25
  -5   1   6  973.96   24.71
  -4   1   6  345.82   10.58
  -3   1   6  531.32   14.26
  -2   1   6  124.52    4.91
   1  -1  -6  227.39    7.53
   0  -1  -6  270.20    8.57
   0  -1  -6  275.36    6.72
  -1  -1  -6 2237.45   51.17
  -1  -1  -6 2302.13   44.58
  -2  -1  -6  411.52   11.68
  -2  -1  -6  409.52    9.24
  -3  -1  -6 2535.01   59.43
  -3  -1  -6 2698.11   51.37
  -4  -1  -6  851.72   22.31
  -4  -1  -6  846.48   17.93
  -5  -1  -6 1276.65   32.09
  -5  -1  -6 1292.06   26.48
  -6  -1  -6  170.51    8.30
  -6  -1  -6  170.10    5.52
  -7  -1  -6  260.52   10.69
  -7  -1  -6  243.96    7.30
  -8  -1  -6  363.44    9.79
  -8  -1  -6  349.86   13.63
  -9  -1  -6  241.91    7.88
  -9  -1  -6  249.56   11.80
 -10  -1  -6   -1.15    2.08
 -10  -1  -6    3.43    4.48
 -11  -1  -6   -1.94    4.62
 -12  -1  -6  189.82   12.26
 -13  -1  -6   49.59    8.23
 -14  -1  -6   73.72    9.73
 -14   2   6   15.78    6.61
 -13   2   6  103.37    9.80
 -12   2   6   96.20    8.97
 -11   2   6  302.99   13.93
 -10   2   6    1.73    4.01
  -9   2   6   96.92    7.46
  -8   2   6  782.14   22.44
  -7   2   6  308.82   11.36
  -6   2   6  843.20   22.63
  -5   2   6  893.51   23.06
  -4   2   6   15.46    2.59
  -3   2   6  163.70    6.28
  -2   2   6 1258.97   29.54
   1  -2  -6   46.03    3.53
   0  -2  -6  111.01    5.33
   0  -2  -6  124.81    3.75
  -1  -2  -6  657.87   13.75
  -2  -2  -6  852.05   20.92
  -2  -2  -6  808.20   16.94
  -3  -2  -6  630.49   13.36
  -3  -2  -6  638.52   17.19
  -4  -2  -6  729.46   19.81
  -4  -2  -6  741.22   15.52
  -5  -2  -6  188.05    8.11
  -5  -2  -6  172.53    5.17
  -6  -2  -6  643.30   14.36
  -6  -2  -6  649.68   19.05
  -7  -2  -6  883.32   24.90
  -7  -2  -6  901.24   19.42
  -8  -2  -6  397.82   10.19
  -8  -2  -6  383.81   14.49
  -9  -2  -6  248.76    7.80
  -9  -2  -6  247.29   11.94
 -10  -2  -6 1710.97   36.09
 -10  -2  -6 1705.30   44.95
 -11  -2  -6   43.67    7.36
 -12  -2  -6    7.73    5.79
 -13  -2  -6  278.05   15.73
 -14  -2  -6    7.39    7.02
 -14   3   6    6.92    4.31
 -14   3   6   -2.24    5.64
 -13   3   6   96.34    9.66
 -12   3   6    3.16    5.01
 -11   3   6   98.78    8.65
 -10   3   6  105.66    8.04
  -9   3   6    2.07    3.65
  -8   3   6  246.35   10.48
  -7   3   6 1097.00   28.64
  -6   3   6 1399.66   34.54
  -5   3   6 3265.50   73.91
  -4   3   6   22.92    2.86
  -3   3   6  440.08   12.37
   1  -3  -6 2818.46   63.47
   0  -3  -6   45.46    3.80
  -1  -3  -6 5271.62  116.63
   1   3   6 5381.15   94.75
  -1  -3  -6 5272.91  102.24
  -2  -3  -6  507.10   10.62
  -2  -3  -6  503.32   13.96
  -3  -3  -6  895.11   18.01
  -3  -3  -6  884.72   22.83
  -4  -3  -6    1.94    2.76
  -4  -3  -6    2.73    1.02
  -5  -3  -6   36.77    2.37
  -5  -3  -6   36.68    4.37
  -6  -3  -6 1028.27   21.11
  -6  -3  -6  990.35   27.01
  -7  -3  -6  118.36    7.30
  -7  -3  -6  113.57    4.31
  -8  -3  -6  332.34   13.42
  -8  -3  -6  349.82    9.03
  -9  -3  -6  104.90    4.75
  -9  -3  -6   97.57    8.26
 -10  -3  -6  114.35    9.13
 -11  -3  -6   -4.60    4.08
 -12  -3  -6  101.84    9.92
 -13  -3  -6  489.38   20.73
 -14  -3  -6   75.84    9.98
 -13   4   6  237.19   10.18
 -13   4   6  233.38   13.55
 -12   4   6   14.82    5.96
 -11   4   6  306.89   14.00
 -10   4   6   39.09    5.59
  -9   4   6   17.42    4.36
  -8   4   6   15.55    3.77
  -7   4   6   20.71    3.69
  -6   4   6   27.21    3.55
  -5   4   6  594.22   16.56
  -4   4   6   47.99    3.99
  -3   4   6 2195.76   50.10
   2  -4  -6  264.61    9.13
   1  -4  -6 2016.71   46.49
   0  -4  -6  307.41    9.56
  -1  -4  -6    6.64    2.01
   1   4   6    6.08    0.91
  -2  -4  -6    0.59    2.12
  -2  -4  -6    1.16    0.67
   2   4   6    0.72    0.79
  -3  -4  -6  369.97    7.95
  -3  -4  -6  380.41   11.97
  -4  -4  -6  651.16   13.01
  -4  -4  -6  603.93   17.75
  -5  -4  -6 1888.73   37.32
  -5  -4  -6 1905.34   45.78
  -6  -4  -6   51.49    5.18
  -6  -4  -6   46.78    2.60
  -7  -4  -6 2544.51   62.08
  -7  -4  -6 2674.29   51.59
  -8  -4  -6   -2.46    3.09
  -8  -4  -6    0.72    1.40
  -9  -4  -6    2.31    4.24
 -10  -4  -6  295.62   13.51
 -11  -4  -6   55.61    7.44
 -12  -4  -6  144.45   11.34
 -13  -4  -6  164.97   12.48
 -14  -4  -6    4.61    6.67
 -13   5   6   -2.22    3.88
 -13   5   6    2.89    5.37
 -12   5   6   30.21    6.37
 -12   5   6   30.66    4.71
 -11   5   6  506.36   18.70
 -10   5   6   28.13    5.22
  -9   5   6   57.76    5.88
  -8   5   6  118.56    7.34
  -7   5   6   53.49    5.15
  -6   5   6  114.55    6.27
  -5   5   6  854.24   22.20
  -4   5   6  240.37    8.44
  -3   5   6  233.22    7.95
   2  -5  -6  492.46   14.17
   1  -5  -6 1116.14   27.30
   0  -5  -6  860.21   21.64
  -1  -5  -6  367.81   10.95
   1   5   6  359.34    7.56
   2   5   6  128.00    3.56
  -2  -5  -6  131.96    6.23
   3   5   6  827.13   16.21
  -3  -5  -6  835.49   16.58
  -3  -5  -6  835.19   22.02
  -4  -5  -6  580.23   11.95
  -4  -5  -6  603.02   17.26
  -5  -5  -6  901.16   24.69
  -5  -5  -6  925.08   18.39
  -6  -5  -6    2.60    3.31
  -6  -5  -6    0.34    0.99
  -7  -5  -6  295.29   12.18
  -7  -5  -6  299.52    7.36
  -8  -5  -6    2.42    3.90
  -9  -5  -6  285.42   13.17
 -10  -5  -6   11.47    4.69
 -11  -5  -6  109.53    9.26
 -12  -5  -6  270.88   14.72
 -13  -5  -6  262.83   15.27
 -14  -5  -6  175.80   13.70
 -13   6   6   82.97    7.31
 -12   6   6   86.88    8.83
 -12   6   6   84.27    6.73
 -11   6   6    8.48    4.75
 -11   6   6    8.25    3.72
 -10   6   6  264.80   12.18
  -9   6   6    4.10    3.72
  -8   6   6   81.29    6.34
  -7   6   6  433.71   14.33
  -6   6   6   24.83    3.47
  -5   6   6   15.23    2.84
  -4   6   6    2.43    2.00
  -3   6   6 1888.67   43.61
   2  -6  -6  471.25   13.95
   1  -6  -6  125.12    5.92
   0  -6  -6  717.98   18.70
   1   6   6   33.45    1.91
  -1  -6  -6   35.01    3.31
  -2  -6  -6 3238.87   72.98
   2   6   6 3215.76   58.35
  -3  -6  -6  195.03    8.14
   3   6   6  198.15    5.23
  -4  -6  -6   27.55    4.05
   4   6   6   22.62    1.85
  -5  -6  -6  601.27   17.78
  -5  -6  -6  552.45   11.57
  -6  -6  -6  191.07    4.69
  -6  -6  -6  193.09    9.47
  -7  -6  -6  220.67   10.64
  -8  -6  -6   92.33    7.41
  -9  -6  -6  125.02    8.87
 -10  -6  -6   30.34    6.17
 -11  -6  -6   85.97    8.60
 -12  -6  -6   21.60    6.86
 -13  -6  -6   15.46    6.96
 -14  -6  -6   23.49    7.93
 -12   7   6  223.75   10.28
 -11   7   6  116.17    9.25
 -11   7   6  121.34    7.37
 -10   7   6  230.47    9.33
 -10   7   6  243.52   11.59
  -9   7   6  199.43   10.03
  -8   7   6   75.47    6.18
  -7   7   6  561.13   17.04
  -6   7   6   -1.72    2.51
  -5   7   6 3847.21   86.46
  -4   7   6  493.51   14.05
  -3   7   6  873.37   21.89
   2  -7  -6    4.00    2.58
   1  -7  -6 1318.54   31.91
   0  -7  -6 2596.81   59.19
   1   7   6   20.99    1.66
  -1  -7  -6   22.27    2.85
  -2  -7  -6 1260.70   30.93
   2   7   6 1262.24   23.98
  -3  -7  -6   25.05    3.76
   3   7   6   24.49    1.87
   4   7   6  187.95    5.36
  -4  -7  -6  185.55    8.82
   5   7   6  167.21    5.19
  -5  -7  -6  156.65    8.42
  -6  -7  -6   -1.99    3.15
  -7  -7  -6  136.32    8.56
  -8  -7  -6  586.02   19.53
  -9  -7  -6   81.03    8.30
 -10  -7  -6  247.86   13.13
 -11  -7  -6   65.07    8.11
 -12  -7  -6   31.06    7.26
 -13  -7  -6  118.90   11.71
 -14  -7  -6   37.01    8.89
 -12   8   6   50.58    6.13
 -11   8   6    8.97    4.15
 -10   8   6   29.18    4.61
  -9   8   6   61.12    5.41
  -9   8   6   56.78    5.89
  -8   8   6    7.12    3.43
  -6   8   6   82.92    5.90
  -5   8   6 1363.78   33.29
  -4   8   6  112.67    5.70
  -3   8   6  976.34   24.13
   2  -8  -6 1170.16   29.18
   1  -8  -6  110.96    5.74
   0  -8  -6   52.44    4.33
   1   8   6  111.67    3.75
  -1  -8  -6   87.42    5.36
   2   8   6   73.93    2.41
  -2  -8  -6   74.92    5.33
   2   8   6   68.81    3.11
   3   8   6  325.15    7.81
  -3  -8  -6  326.12   11.53
  -4  -8  -6   93.76    6.70
   4   8   6   84.97    3.67
  -5  -8  -6 1999.68   49.26
   5   8   6 2044.62   38.31
   6   8   6   56.51    3.45
  -6  -8  -6   63.80    6.46
  -7  -8  -6  434.70   15.90
  -8  -8  -6  919.53   27.31
  -9  -8  -6  196.94   11.03
 -10  -8  -6  519.56   19.80
 -11  -8  -6  124.98   10.03
 -12  -8  -6   14.83    6.72
 -13  -8  -6  449.82   20.11
 -14  -8  -6  132.26   13.02
 -11   9   6  382.82   13.51
 -10   9   6   36.72    5.01
  -9   9   6   20.68    4.11
  -8   9   6   88.76    5.86
  -7   9   6   13.88    3.23
  -7   9   6   24.93    4.04
  -6   9   6  235.97    9.47
  -5   9   6   15.86    3.04
  -4   9   6   33.19    3.39
  -3   9   6  126.81    5.72
   2  -9  -6  998.11   25.59
   1  -9  -6 1404.98   33.98
   0  -9  -6  966.57   24.54
  -1  -9  -6  137.33    6.42
   1   9   6  144.40    4.14
   1   9   6  137.75    4.58
   2   9   6    2.85    1.43
  -2  -9  -6    0.68    2.35
   2   9   6    5.55    1.03
  -3  -9  -6  690.95   19.90
   3   9   6  697.12   14.89
   3   9   6  741.22   14.32
  -4  -9  -6  121.24    7.39
   4   9   6  112.04    4.34
   5   9   6 2807.04   51.74
  -5  -9  -6 2747.14   65.52
  -6  -9  -6  126.07    8.31
   6   9   6  142.73    5.19
   7   9   6  492.56   12.02
  -7  -9  -6  475.87   17.22
  -8  -9  -6  902.54   27.02
  -9  -9  -6  445.19   17.56
 -10  -9  -6  458.84   18.57
 -11  -9  -6  242.59   13.93
 -12  -9  -6  125.53   11.47
 -13  -9  -6    7.76    6.96
 -14  -9  -6    8.68    7.50
 -11  10   6  309.07   12.40
 -10  10   6  153.94    8.52
  -9  10   6    1.40    3.39
  -8  10   6  178.13    8.03
  -7  10   6   76.16    5.35
  -6  10   6  267.93    9.19
  -5  10   6   65.59    5.00
  -5  10   6   58.61    4.42
  -4  10   6    0.52    1.99
  -4  10   6    2.14    2.12
  -2  10   6   97.16    4.34
  -1  10   6   10.42    1.86
   1 -10  -6    1.72    2.56
   0 -10  -6   24.62    3.19
   0  10   6   23.27    2.06
   1  10   6  311.62    7.41
  -1 -10  -6  296.40   10.17
   1  10   6  298.56    7.82
   2  10   6 2892.82   53.83
  -2 -10  -6 2882.01   66.67
   2  10   6 2954.34   56.64
   3  10   6 1822.29   35.54
  -3 -10  -6 1850.51   45.03
   3  10   6 1930.72   36.58
  -4 -10  -6  133.48    7.71
   4  10   6  115.71    4.57
   5  10   6  393.20    9.87
  -5 -10  -6  399.02   14.34
   6  10   6    1.79    1.76
  -6 -10  -6    1.11    3.44
   7  10   6  264.47    8.04
  -7 -10  -6  282.28   12.67
  -8 -10  -6   70.09    6.96
  -9 -10  -6    2.13    4.30
 -10 -10  -6   40.52    6.52
 -11 -10  -6  583.03   22.14
 -12 -10  -6  284.41   15.89
 -13 -10  -6  119.65   11.82
 -14 -10  -6   85.78   10.99
 -10  11   6   52.92    6.04
  -9  11   6    5.73    3.77
  -8  11   6   11.35    3.78
  -7  11   6   -1.52    2.84
  -6  11   6  108.51    6.10
  -5  11   6  344.15   10.62
  -4  11   6  282.36    8.94
  -3  11   6   10.48    2.42
  -2  11   6  110.73    4.83
  -1  11   6  180.90    5.75
   1 -11  -6  158.48    7.24
   0  11   6  123.02    4.58
   0 -11  -6  138.50    6.48
   1  11   6 1575.08   30.44
   1  11   6 1578.48   31.54
  -1 -11  -6 1528.44   37.49
   2  11   6    4.03    1.69
   2  11   6    4.18    1.27
  -2 -11  -6    4.54    2.93
  -3 -11  -6   58.56    5.40
   3  11   6   65.80    3.42
  -4 -11  -6  667.35   19.80
   4  11   6  648.52   14.53
  -5 -11  -6  392.06   14.46
   5  11   6  399.23   10.12
  -6 -11  -6  505.01   17.47
   6  11   6  509.97   12.27
  -7 -11  -6  110.14    8.63
   7  11   6  103.92    4.84
  -8 -11  -6  104.66    9.02
   8  11   6   98.22    5.19
  -9 -11  -6  135.33   10.17
 -10 -11  -6    5.68    5.53
 -11 -11  -6   43.18    7.72
 -12 -11  -6   -1.64    5.31
 -13 -11  -6   55.75    9.06
 -14 -11  -6   -2.69    7.03
 -10  12   6  233.86   10.60
  -9  12   6  159.71    8.48
  -8  12   6  280.46   10.82
  -7  12   6  332.38   11.43
  -6  12   6   69.38    5.41
  -5  12   6   10.97    3.12
  -4  12   6   -1.36    2.39
  -3  12   6    3.00    2.29
  -2  12   6  508.87   12.82
   0 -12  -6  777.44   20.72
   0  12   6  775.75   17.20
   1  12   6  461.58   11.40
   1  12   6  480.28   11.23
  -1 -12  -6  497.91   14.53
   2  12   6   12.02    2.19
   2  12   6    9.17    1.63
  -2 -12  -6   15.15    3.15
  -3 -12  -6  155.41    7.78
   3  12   6  158.24    5.49
  -4 -12  -6   23.29    4.35
   4  12   6   27.10    2.71
  -5 -12  -6 1584.56   40.37
   5  12   6 1547.06   31.04
   6  12   6 1749.71   34.11
  -6 -12  -6 1682.93   44.09
  -7 -12  -6   44.44    6.34
   7  12   6   54.42    4.03
  -8 -12  -6   38.90    6.35
   8  12   6   40.28    3.62
  -9 -12  -6  155.92   10.89
 -10 -12  -6   29.25    6.81
 -11 -12  -6   17.50    6.62
 -12 -12  -6    1.28    6.13
 -13 -12  -6  516.91   22.90
 -14 -12  -6    4.38    7.51
  -9  13   6   -6.59    3.43
  -8  13   6   38.85    5.13
  -7  13   6   26.50    4.37
  -6  13   6   57.10    5.17
  -5  13   6  365.67   11.50
  -4  13   6   15.35    3.19
  -3  13   6   19.11    3.12
  -2  13   6    1.92    2.25
  -1  13   6  158.78    5.93
   0  13   6  180.59    6.07
  -1 -13  -6  209.61    8.31
   1  13   6  192.02    6.05
   1  13   6  183.45    6.48
   2  13   6   17.59    2.51
  -3 -13  -6  256.24   10.41
   3  13   6  267.66    7.78
  -4 -13  -6   73.17    6.50
   4  13   6   85.80    4.50
   5  13   6  879.59   19.16
  -5 -13  -6  865.60   25.55
   6  13   6   36.19    3.44
  -6 -13  -6   47.55    6.59
  -7 -13  -6  361.04   15.15
   7  13   6  359.78   10.33
  -8 -13  -6   10.01    5.29
   8  13   6    9.76    2.76
  -9 -13  -6   68.49    8.00
   9  13   6   75.71    4.75
 -10 -13  -6    8.59    5.76
 -11 -13  -6   15.41    6.07
 -12 -13  -6   13.85    7.02
 -13 -13  -6  108.50   11.63
  -9  14   6  170.83    9.45
  -8  14   6  312.70   12.03
  -7  14   6   -5.35    3.26
  -6  14   6   69.57    5.82
  -5  14   6   80.10    5.80
  -4  14   6  298.12    9.98
  -3  14   6  124.77    6.13
  -2  14   6   15.37    2.92
  -1  14   6  188.68    6.87
   0  14   6    2.66    2.01
   1  14   6   28.70    3.11
   1  14   6   36.93    3.24
   2  14   6   14.90    2.66
  -2 -14  -6    1.49    3.44
  -3 -14  -6    7.59    3.55
   3  14   6    8.47    2.33
  -4 -14  -6   13.47    4.45
   4  14   6    9.44    2.26
   5  14   6 1102.82   23.49
  -5 -14  -6 1107.01   30.81
   6  14   6  719.28   16.96
  -6 -14  -6  731.77   23.04
   7  14   6  336.29   10.06
  -7 -14  -6  339.85   14.84
   8  14   6    7.30    2.48
  -8 -14  -6    5.73    5.01
   9  14   6  114.32    6.05
  -9 -14  -6  129.66   10.35
 -10 -14  -6   22.44    6.57
 -11 -14  -6   41.24    7.93
 -12 -14  -6   -4.83    5.97
 -13 -14  -6   64.92   10.38
  -8  15   6   74.10    6.79
  -7  15   6   27.55    4.86
  -6  15   6   -2.54    3.31
  -5  15   6   17.13    4.02
  -4  15   6  651.07   17.20
  -3  15   6   72.56    5.19
  -2  15   6   22.81    3.37
  -1  15   6  332.69    9.90
   0  15   6   49.43    3.90
   0  15   6   45.96    3.91
   1  15   6  101.86    5.19
   2  15   6   14.09    2.80
   3  15   6   51.49    4.13
   4  15   6  329.24    9.65
  -4 -15  -6  304.67   12.54
  -5 -15  -6  226.88   11.41
   5  15   6  224.66    7.86
   6  15   6 1275.66   26.99
  -6 -15  -6 1258.14   35.14
  -7 -15  -6   51.45    6.94
   7  15   6   42.55    4.02
  -8 -15  -6  319.12   14.86
   8  15   6  292.57    9.72
  -9 -15  -6    9.42    5.74
   9  15   6    6.18    2.84
  10  15   6   36.49    4.22
 -10 -15  -6   19.09    6.51
 -11 -15  -6   38.11    8.07
 -12 -15  -6   48.97    8.69
 -13 -15  -6   62.98   10.09
  -8  16   6   27.30    5.16
  -7  16   6    4.59    4.02
  -6  16   6  169.01    8.54
  -5  16   6   43.92    5.13
  -4  16   6   -3.51    3.10
  -3  16   6   18.62    3.57
  -2  16   6  201.64    7.85
  -1  16   6   -0.20    2.38
   0  16   6    5.44    2.55
   1  16   6    0.76    2.18
   2  16   6   32.76    3.51
   3  16   6  143.12    6.29
   4  16   6   20.85    3.16
   5  16   6   77.80    4.96
  -6 -16  -6  605.72   20.59
   6  16   6  600.92   15.32
  -7 -16  -6  347.71   15.71
   7  16   6  361.87   11.00
   8  16   6  115.36    6.22
  -8 -16  -6  124.75   10.56
  -9 -16  -6  190.87   12.45
   9  16   6  206.03    8.23
  10  16   6  144.03    7.10
 -10 -16  -6  135.11   11.76
 -11 -16  -6   78.34    9.67
 -12 -16  -6   80.39   10.34
 -13 -16  -6  164.94   14.26
  -7  17   6   96.50    7.57
  -6  17   6   -3.38    3.56
  -5  17   6   19.15    4.35
  -4  17   6   61.54    5.52
  -3  17   6   24.90    4.04
  -2  17   6   37.58    4.25
   0  17   6  161.92    6.82
   1  17   6  223.40    8.19
   2  17   6  117.93    6.09
   3  17   6   47.70    4.19
   4  17   6   91.73    5.48
   5  17   6  218.52    8.28
   6  17   6  140.15    6.68
   7  17   6  204.16    8.16
  -8 -17  -6  265.86   14.42
   8  17   6  273.38    9.68
   9  17   6   12.31    3.34
  -9 -17  -6   10.14    6.13
 -10 -17  -6  161.13   12.23
  10  17   6  165.70    7.78
 -11 -17  -6   26.88    7.64
 -12 -17  -6   98.14   11.09
  -6  18   6   60.33    6.34
  -5  18   6   16.86    4.26
  -4  18   6   77.99    6.35
  -3  18   6   -1.75    3.19
   0  18   6   64.99    4.98
   1  18   6    2.28    2.72
   2  18   6  844.31   19.99
   3  18   6  635.10   16.16
   4  18   6  187.96    7.90
   5  18   6  488.03   13.78
   6  18   6   74.87    5.11
   7  18   6    0.33    2.88
   8  18   6    4.28    2.96
   9  18   6   27.84    3.89
  10  18   6   41.03    4.73
  11  18   6  104.24    6.98
 -11 -18  -6  101.47   10.95
 -12 -18  -6    8.86    8.03
  -5  19   6   81.56    7.03
  -4  19   6   19.80    4.53
  -3  19   6   95.41    6.74
  -1  19   6  186.87    8.20
   0  19   6    6.67    2.89
   1  19   6    8.38    3.11
   2  19   6    7.25    3.01
   3  19   6   90.17    5.71
   4  19   6  430.83   12.84
   5  19   6   47.53    4.78
   6  19   6  303.53   10.52
   7  19   6   67.75    5.56
   8  19   6  312.10   10.99
   9  19   6    7.42    3.16
  10  19   6   22.00    4.12
  -5  20   6   27.47    5.31
  -1  20   6   12.66    3.66
   0  20   6   74.50    5.64
   1  20   6   29.40    4.07
   2  20   6   18.73    3.69
   3  20   6   65.58    5.27
   4  20   6   43.38    4.62
   5  20   6   -2.85    2.67
   6  20   6   17.50    3.81
   7  20   6   22.99    4.10
   8  20   6   -5.24    2.97
   9  20   6   28.52    4.48
  -2  21   6    8.30    4.10
  -1  21   6  198.49    9.12
   0  21   6   98.80    6.65
   1  21   6   -3.98    3.07
   2  21   6  510.25   14.88
   3  21   6  149.53    7.62
   4  21   6    5.30    3.40
   5  21   6   16.31    4.05
   6  21   6    7.16    3.68
   7  21   6  122.30    7.37
   8  21   6   15.72    4.13
   0  22   6   37.52    5.11
   1  22   6    7.67    3.89
   2  22   6  206.56    9.24
   3  22   6   84.02    6.36
   4  22   6   11.30    3.86
   5  22   6  115.54    7.38
   6  22   6   47.13    5.31
   6  19  -7   -2.75    3.87
   5  19  -7  200.21    9.46
   4  19  -7   11.10    3.91
   3  19  -7   39.15    4.98
   2  19  -7   15.16    4.56
   1  19  -7    0.63    4.49
   0  19  -7   42.64    5.56
   8  18  -7    3.82    3.62
   7  18  -7    4.53    3.60
   6  18  -7  160.91    8.35
   5  18  -7  107.81    6.87
   4  18  -7   37.18    5.01
   3  18  -7    1.30    3.51
   2  18  -7  252.93   10.04
   1  18  -7    3.31    4.06
   0  18  -7   89.52    6.80
   0  18  -7   81.38    6.74
  -1  18  -7    1.52    4.35
  -1  18  -7    2.46    3.55
  -2  18  -7  197.02    9.75
  -2  18  -7  201.38    9.96
   9  17  -7   59.65    5.74
   8  17  -7   80.96    6.18
   7  17  -7   12.54    3.68
   6  17  -7   17.72    3.89
   5  17  -7   57.27    5.12
   4  17  -7   44.35    4.66
   3  17  -7   29.91    4.25
   2  17  -7  147.83    7.61
   1  17  -7  153.25    7.82
   1  17  -7  149.40    8.07
   0  17  -7   91.38    6.56
   0  17  -7   82.77    6.53
  -1  17  -7   64.48    5.85
  -1  17  -7   59.20    5.57
  -2  17  -7   21.72    4.58
  -3  17  -7   97.88    7.28
  10  16  -7   41.42    4.96
   9  16  -7   65.16    5.63
   8  16  -7    3.57    3.39
   7  16  -7   40.36    4.45
   6  16  -7  112.10    6.49
   5  16  -7   59.38    4.90
   4  16  -7   90.69    6.11
   3  16  -7    7.32    3.18
   2  16  -7   51.62    4.98
   2  16  -7   56.53    5.14
   1  16  -7   31.55    4.31
   1  16  -7   35.20    4.49
   0  16  -7    9.42    3.79
   0  16  -7   10.99    3.47
  -1  16  -7   75.26    5.91
  -1  16  -7   77.70    6.15
  -2  16  -7   43.13    5.07
  -3  16  -7   92.05    6.87
  -4  16  -7  155.45    8.61
   9  15  -7  663.94   17.46
   8  15  -7   29.12    4.18
   7  15  -7  126.82    6.61
   6  15  -7  149.98    7.06
   5  15  -7   26.46    3.64
   4  15  -7  187.86    7.85
   3  15  -7  137.61    7.00
   3  15  -7  146.30    6.80
   2  15  -7  183.56    7.72
   2  15  -7  188.42    8.20
   1  15  -7   21.73    3.64
   1  15  -7    8.98    3.20
   0  15  -7   19.43    3.68
   0  15  -7   23.45    3.89
  -1  15  -7  252.70    9.35
  -1  15  -7  258.23   10.03
  -2  15  -7   24.30    4.16
  -3  15  -7   -2.25    3.05
  -4  15  -7   -0.04    3.42
  -5  15  -7   21.39    4.66
   9  14  -7    1.09    3.05
   8  14  -7   99.98    5.93
   7  14  -7  602.08   15.55
   6  14  -7   53.76    4.67
   5  14  -7  330.12   10.27
   4  14  -7  286.09    9.99
   4  14  -7  278.74    9.25
   3  14  -7    2.92    2.72
   3  14  -7   12.38    2.88
   2  14  -7   26.05    3.63
   2  14  -7   37.23    4.15
   1  14  -7  204.09    7.89
   1  14  -7  201.43    8.37
   0  14  -7  257.82    8.93
   0  14  -7  246.34    9.49
  -1  14  -7   32.56    4.23
  -2  14  -7  104.90    6.41
  -3  14  -7   67.85    5.67
  -4  14  -7   10.90    3.71
  -5  14  -7   34.00    4.82
  -6  14  -7   -0.69    3.70
   9  13  -7  126.02    6.71
   8  13  -7    2.05    2.59
   7  13  -7   10.32    3.18
   6  13  -7   31.60    3.87
   5  13  -7 1171.39   26.96
   5  13  -7 1156.32   25.03
   4  13  -7  359.15   10.54
   4  13  -7  349.86   11.18
   3  13  -7  679.24   17.41
   3  13  -7  655.08   15.96
   2  13  -7   94.40    5.69
   2  13  -7   85.70    5.30
   1  13  -7  431.44   12.84
   1  13  -7  439.68   11.96
   0  13  -7   57.42    4.91
   0  13  -7   54.64    4.58
  -1  13  -7    8.53    2.98
  -2  13  -7  674.73   17.96
  -3  13  -7   90.90    6.08
  -4  13  -7    6.85    3.31
  -5  13  -7   99.49    6.60
  -6  13  -7   91.01    6.90
  -7  13  -7   17.59    4.78
 -12 -12   7   96.58    9.84
 -11 -12   7  109.03    9.70
   9  12  -7    9.45    3.01
   8  12  -7   18.18    3.10
   7  12  -7   -2.41    2.44
   6  12  -7  376.48   10.72
   5  12  -7    6.77    2.75
   5  12  -7    7.44    2.75
   4  12  -7  604.16   14.66
   4  12  -7  608.62   15.90
   3  12  -7  122.74    6.17
   3  12  -7  123.34    5.62
   2  12  -7  687.18   15.90
   2  12  -7  656.61   17.12
   1  12  -7   11.80    3.00
   1  12  -7   10.28    2.90
   0  12  -7   28.50    3.39
   0  12  -7   28.17    3.62
  -1  12  -7  154.98    7.04
  -2  12  -7  831.37   20.78
  -3  12  -7  110.61    6.35
  -4  12  -7   58.97    5.21
  -5  12  -7   49.67    5.06
  -6  12  -7    2.67    3.45
  -7  12  -7    1.81    3.59
  -8  12  -7  197.23    9.78
 -13 -11   7   46.64    8.45
 -12 -11   7  315.17   15.88
 -11 -11   7   17.86    5.96
 -10 -11   7    3.22    4.80
  -9 -11   7   18.00    5.30
  -8 -11   7  158.66    9.36
   8  11  -7  164.16    6.88
   7  11  -7   22.11    3.23
   6  11  -7  424.22   11.34
   6  11  -7  413.76   12.01
   5  11  -7    7.20    2.59
   5  11  -7   10.56    2.54
   4  11  -7  442.33   12.42
   4  11  -7  436.09   11.31
   3  11  -7   35.40    3.65
   3  11  -7   33.07    3.12
   2  11  -7   31.40    3.54
   2  11  -7   40.00    3.56
   1  11  -7   -1.86    2.10
   1  11  -7    1.93    2.18
   0  11  -7    2.22    2.37
  -1  11  -7   -3.36    2.05
  -2  11  -7   23.77    3.70
  -3  11  -7  111.89    6.17
  -4  11  -7  395.82   12.38
  -5  11  -7   45.51    4.74
  -6  11  -7  189.80    8.62
  -7  11  -7    1.63    3.38
  -8  11  -7  283.86   11.37
  -9  11  -7    1.22    3.91
 -13 -10   7    2.85    5.87
 -12 -10   7  105.92   10.11
 -11 -10   7   68.55    7.95
 -10 -10   7  183.30   11.12
  -9 -10   7  262.47   12.36
  -8 -10   7   42.28    5.60
   8  10  -7   54.92    4.22
   7  10  -7    6.53    2.39
   7  10  -7   10.65    2.72
  -7 -10   7   11.57    3.93
  -6 -10   7   50.94    5.15
   6  10  -7   57.09    4.37
   6  10  -7   44.74    3.78
   5  10  -7   41.41    3.41
   5  10  -7   41.58    3.67
   4  10  -7  211.63    6.91
   4  10  -7  206.11    7.56
   3  10  -7  115.25    5.10
   3  10  -7  118.86    5.61
   2  10  -7   26.22    3.23
   2  10  -7   28.54    2.89
   1  10  -7    0.08    1.90
   1  10  -7    1.65    2.16
   0  10  -7  225.94    8.06
  -1  10  -7   55.36    4.48
  -2  10  -7   61.60    4.59
  -3  10  -7   71.97    4.96
  -4  10  -7   58.67    4.97
  -5  10  -7   25.25    3.80
  -6  10  -7    1.01    3.00
  -7  10  -7  388.69   12.93
  -8  10  -7   70.79    6.11
  -9  10  -7   37.89    5.28
 -13  -9   7    7.77    6.30
 -12  -9   7   80.02    8.96
 -11  -9   7   15.81    5.67
 -10  -9   7   98.53    9.03
  -9  -9   7 1095.72   31.17
  -8  -9   7  412.82   15.19
  -7  -9   7 1428.08   36.97
   7   9  -7 1467.97   31.35
   7   9  -7 1421.50   29.18
   6   9  -7   84.90    4.36
  -6  -9   7   90.03    6.31
   6   9  -7   81.21    4.86
  -5  -9   7  386.10   12.87
   5   9  -7  392.65   10.05
   5   9  -7  390.76   11.02
   4   9  -7  219.89    7.64
  -4  -9   7  227.93    8.65
   3   9  -7  355.20   10.12
   3   9  -7  338.79    8.95
   2   9  -7 1049.75   21.29
   2   9  -7 1016.45   23.33
   1   9  -7  291.95    9.02
   1   9  -7  285.91    8.04
   0   9  -7   74.97    4.59
  -1   9  -7  129.00    5.96
  -2   9  -7   13.12    2.74
  -3   9  -7   71.50    4.87
  -4   9  -7  230.20    8.57
  -5   9  -7  183.30    7.73
  -6   9  -7  185.95    8.00
  -7   9  -7   -0.39    3.03
  -8   9  -7   48.41    5.28
  -9   9  -7  634.15   18.37
 -10   9  -7    3.61    3.94
 -13  -8   7   33.70    7.55
 -12  -8   7   46.12    7.41
 -11  -8   7    0.40    4.79
 -10  -8   7   27.63    5.65
  -9  -8   7   41.06    5.74
  -8  -8   7  517.94   17.50
   7   8  -7  742.42   16.64
   7   8  -7  730.69   17.74
  -7  -8   7  738.86   21.68
  -6  -8   7   24.04    3.95
   6   8  -7   27.45    2.97
   6   8  -7   24.71    2.59
   5   8  -7    8.54    2.36
  -5  -8   7   12.07    3.23
   5   8  -7    7.76    2.08
   4   8  -7  406.45   10.05
  -4  -8   7  418.71   12.57
   4   8  -7  420.08   11.28
   3   8  -7  129.10    4.79
   3   8  -7  130.41    5.53
  -3  -8   7  127.90    5.75
   2   8  -7  581.23   14.42
   2   8  -7  577.20   12.81
   1   8  -7  149.50    5.91
   1   8  -7  142.96    5.05
   0   8  -7   60.46    4.04
  -1   8  -7  137.28    5.85
  -2   8  -7   65.81    4.27
  -3   8  -7  182.59    7.05
  -4   8  -7  174.82    7.14
  -5   8  -7   61.78    4.80
  -6   8  -7   39.72    4.15
  -7   8  -7   44.53    4.50
  -8   8  -7   43.23    4.67
  -9   8  -7  135.19    7.62
 -10   8  -7   -3.75    3.40
 -11   8  -7  138.84    8.52
 -13  -7   7  277.95   15.37
 -12  -7   7  109.68    9.91
 -11  -7   7   -1.14    4.69
 -10  -7   7  222.34   11.38
  -9  -7   7  117.22    8.35
  -8  -7   7  113.99    8.00
  -7  -7   7  233.24   10.30
  -6  -7   7    9.46    3.23
   6   7  -7   10.99    2.34
   6   7  -7    9.25    1.96
   5   7  -7  579.60   12.95
  -5  -7   7  568.77   16.56
   5   7  -7  579.67   14.24
  -4  -7   7  384.97   11.95
   4   7  -7  387.44   10.58
   4   7  -7  401.76    9.51
   3   7  -7   28.95    2.84
  -3  -7   7   28.27    2.81
   3   7  -7   23.77    2.14
   2   7  -7  473.08   12.11
  -2  -7   7  465.32   12.52
   2   7  -7  474.79   10.69
  -1  -7   7  696.61   16.82
   1   7  -7  686.50   16.46
   1   7  -7  708.55   14.73
   0   7  -7  185.86    6.57
  -1   7  -7   60.16    3.93
  -2   7  -7   21.39    2.63
  -3   7  -7   53.27    3.96
  -4   7  -7  932.56   21.71
  -5   7  -7    0.46    2.30
  -6   7  -7  551.77   14.99
  -7   7  -7   26.88    3.76
  -8   7  -7  205.89    8.60
  -9   7  -7   13.64    3.69
 -10   7  -7    3.49    3.38
 -11   7  -7    1.94    3.73
 -13  -6   7  171.15   12.26
 -12  -6   7   13.13    5.89
 -11  -6   7    0.97    4.70
 -10  -6   7  316.49   13.95
  -9  -6   7  452.28   16.55
  -8  -6   7   20.28    4.50
  -7  -6   7  365.21   13.24
  -6  -6   7    3.28    2.86
   6   6  -7    6.95    1.82
   6   6  -7    4.11    1.96
   5   6  -7  746.74   15.75
  -5  -6   7  753.65   20.32
   5   6  -7  741.81   17.34
   4   6  -7  697.81   16.22
   4   6  -7  680.29   14.47
  -4  -6   7  688.17   18.41
   3   6  -7  743.97   17.39
   3   6  -7  760.13   15.48
  -3  -6   7  763.27   19.27
   2   6  -7 1386.72   26.01
   2   6  -7 1327.33   28.76
  -2  -6   7 1355.10   31.59
  -1  -6   7 1528.16   34.51
   1   6  -7 1507.92   31.92
   1   6  -7 1515.61   28.81
   0  -6   7  459.04   11.43
   0   6  -7  463.55   11.81
  -1   6  -7  144.42    5.64
  -2   6  -7 1310.72   28.22
  -3   6  -7  324.71    9.48
  -4   6  -7  164.47    6.45
  -5   6  -7   54.09    4.28
  -6   6  -7  538.53   14.43
  -7   6  -7  280.79    9.72
  -8   6  -7  669.99   17.79
  -9   6  -7  123.11    6.86
 -10   6  -7    5.18    3.43
 -11   6  -7   -2.22    3.29
 -12   6  -7  155.50    8.80
 -13  -5   7   -1.61    5.24
 -12  -5   7  342.67   15.96
 -11  -5   7  265.51   13.28
 -10  -5   7   76.19    7.61
  -9  -5   7  274.24   11.97
  -8  -5   7   39.74    5.20
  -7  -5   7  523.08   16.62
  -6  -5   7  287.10   10.67
  -5  -5   7  490.41   14.67
   5   5  -7  493.99   12.40
   5   5  -7  498.86   11.08
   4   5  -7  617.70   14.53
   4   5  -7  602.53   12.80
  -4  -5   7  601.06   16.60
  -3  -5   7 2853.08   63.13
   3   5  -7 2781.11   51.17
   3   5  -7 2757.61   56.04
   2   5  -7  748.05   17.16
  -2  -5   7  755.11   18.78
   2   5  -7  766.92   15.17
   1   5  -7 5330.29  105.56
  -1  -5   7 5473.70  118.03
   1   5  -7 5416.87   97.00
   0   5  -7  728.73   16.75
   0  -5   7  733.10   17.38
  -1   5  -7  875.90   19.61
  -2   5  -7   50.17    3.21
  -2   5  -7   45.94    3.35
  -3   5  -7  128.45    5.30
  -3   5  -7  133.56    5.08
  -4   5  -7  105.21    4.98
  -5   5  -7   31.61    3.21
  -6   5  -7    4.50    2.45
  -7   5  -7  125.45    6.26
  -8   5  -7 1631.81   35.97
  -9   5  -7  222.59    8.92
 -10   5  -7  130.43    7.12
 -11   5  -7   29.53    4.58
 -12   5  -7   26.33    4.69
 -13  -4   7   48.01    7.59
 -12  -4   7   20.70    5.53
 -11  -4   7  425.80   17.11
 -10  -4   7  295.01   13.31
  -9  -4   7  221.02   10.86
  -8  -4   7  232.18   10.65
  -7  -4   7  370.75   13.13
  -6  -4   7  151.06    7.41
  -5  -4   7  614.60   17.09
   5   4  -7  595.60   14.37
   4   4  -7  129.11    4.12
  -4  -4   7  132.19    6.02
   4   4  -7  131.32    5.04
   3   4  -7  218.95    6.85
  -3  -4   7  231.09    7.84
   3   4  -7  246.23    5.83
  -2  -4   7  678.42   16.89
   2   4  -7  662.32   15.29
   2   4  -7  663.60   13.30
  -1  -4   7  328.89    9.30
   1   4  -7  343.03    7.45
   1   4  -7  337.76    8.93
   0   4  -7    7.74    1.75
  -1   4  -7  633.44   14.94
  -1   4  -7  657.92   16.19
  -2   4  -7   22.96    2.38
  -2   4  -7   21.82    2.39
  -3   4  -7   46.80    3.37
  -3   4  -7   41.16    3.48
  -4   4  -7   40.48    3.98
  -4   4  -7   38.91    3.31
  -5   4  -7   16.86    2.59
  -5   4  -7   23.43    3.42
  -6   4  -7  491.02   13.04
  -7   4  -7  457.30   12.70
  -8   4  -7  411.26   12.18
  -9   4  -7  292.76   10.17
 -10   4  -7  142.85    7.26
 -11   4  -7   40.48    4.89
 -12   4  -7   17.10    4.11
 -13   4  -7  157.82    8.80
 -13  -3   7   44.94    7.62
 -12  -3   7   54.96    7.02
 -11  -3   7    2.29    4.60
 -10  -3   7  216.20   11.22
  -9  -3   7   30.77    5.16
  -8  -3   7  366.01   13.64
  -7  -3   7  333.73   12.17
  -6  -3   7   58.14    5.04
  -5  -3   7   26.48    3.31
   4   3  -7  744.18   17.08
  -4  -3   7  778.49   19.89
   3   3  -7 1675.73   34.99
   3   3  -7 1747.13   31.54
  -3  -3   7 1691.02   39.55
  -2  -3   7  173.44    6.32
   2   3  -7  186.62    4.50
   2   3  -7  175.56    5.69
  -1  -3   7   50.95    3.14
   1   3  -7   51.86    3.14
   1   3  -7   51.97    2.21
   0   3  -7  155.90    5.27
   0   3  -7  154.10    5.95
  -1   3  -7  358.20    9.96
  -1   3  -7  344.91    9.12
  -2   3  -7 1205.59   25.63
  -2   3  -7 1221.05   28.44
  -3   3  -7  146.40    5.97
  -3   3  -7  160.28    5.55
  -4   3  -7 1249.02   26.45
  -4   3  -7 1220.83   29.96
  -5   3  -7  175.89    6.21
  -5   3  -7  174.26    7.71
  -6   3  -7   71.20    5.87
  -6   3  -7   64.67    4.27
  -7   3  -7  314.80    9.64
  -7   3  -7  298.29   11.98
  -8   3  -7    2.72    2.64
  -9   3  -7   13.45    3.17
 -10   3  -7  313.15   10.64
 -11   3  -7    1.88    3.00
 -12   3  -7    6.10    3.59
 -13  -2   7    0.27    5.21
 -12  -2   7  435.00   17.95
 -11  -2   7  100.44    8.79
 -10  -2   7   32.48    5.56
  -9  -2   7  135.53    8.21
  -8  -2   7  182.30    9.26
  -7  -2   7  200.19    8.86
  -6  -2   7   33.28    3.58
  -5  -2   7   83.03    5.23
   4   2  -7  225.16    6.73
  -4  -2   7  226.42    8.14
  -3  -2   7  605.69   16.04
   2   2  -7  198.57    4.56
  -2  -2   7  201.29    6.76
   2   2  -7  198.69    5.97
   1   2  -7  203.66    6.16
   1   2  -7  221.76    4.75
  -1  -2   7  221.40    6.82
   0   2  -7  330.07    8.44
   0   2  -7  328.08    9.62
  -1   2  -7    6.30    1.50
  -1   2  -7    7.89    2.09
  -2   2  -7   74.53    3.59
  -2   2  -7   76.60    4.15
  -3   2  -7    4.25    1.55
  -3   2  -7    0.98    2.16
  -4   2  -7   60.95    4.77
  -4   2  -7   61.28    3.46
  -5   2  -7  372.57   12.20
  -5   2  -7  368.95    9.88
  -6   2  -7  424.05   13.75
  -6   2  -7  392.33   10.80
  -7   2  -7   22.76    2.95
  -7   2  -7   28.72    4.78
  -8   2  -7  439.66   15.66
  -8   2  -7  453.35   12.50
  -9   2  -7  770.69   23.99
  -9   2  -7  813.84   19.55
 -10   2  -7  423.78   12.64
 -11   2  -7    9.77    3.28
 -12   2  -7   58.48    5.35
 -13  -1   7  198.52   12.64
 -12  -1   7   -2.25    4.63
 -11  -1   7  148.72   10.10
 -10  -1   7   17.62    4.91
  -9  -1   7   34.69    5.16
  -8  -1   7   59.44    6.06
  -7  -1   7 1351.70   34.26
  -5  -1   7  133.82    6.42
  -4  -1   7   56.75    4.15
   3   1  -7 1090.25   22.84
  -3  -1   7 1068.25   26.21
  -2  -1   7  105.29    4.72
   2   1  -7  101.80    4.03
   1   1  -7  402.72    9.61
   1   1  -7  391.64   11.67
   1   1  -7  401.09    7.71
   0   1  -7  151.24    4.74
   0   1  -7  146.85    5.85
  -1   1  -7  304.78    7.88
  -1   1  -7  320.42    9.44
  -2   1  -7  380.41    9.27
  -2   1  -7  373.02   10.88
  -3   1  -7 1142.16   28.19
  -3   1  -7 1186.65   24.42
  -4   1  -7   12.30    1.87
  -4   1  -7   14.60    3.02
  -5   1  -7  388.42   10.02
  -5   1  -7  392.27   12.79
  -6   1  -7    6.48    3.06
  -6   1  -7    6.36    1.85
  -7   1  -7  186.15    9.41
  -7   1  -7  183.87    6.58
  -8   1  -7  208.01   10.36
  -8   1  -7  214.06    7.60
  -9   1  -7   43.02    3.88
  -9   1  -7   45.76    5.93
 -10   1  -7  180.55   11.13
 -10   1  -7  180.56    7.52
 -11   1  -7  258.58   13.29
 -11   1  -7  257.05    9.44
 -13   0   7  130.93   10.70
 -12   0   7   -2.42    4.91
 -11   0   7   -1.57    4.40
 -10   0   7   63.49    6.67
  -9   0   7  130.34    8.07
  -8   0   7  964.46   26.62
  -7   0   7  105.09    6.34
  -6   0   7  372.78   12.34
  -5   0   7  425.20   13.02
  -4   0   7   14.25    2.49
  -3   0   7 1357.52   32.24
  -2   0   7   45.39    3.33
   2   0  -7   38.70    2.58
   1   0  -7    6.25    2.10
   1   0  -7   10.68    1.44
   0   0  -7   78.98    3.26
   0   0  -7   74.04    4.39
  -1   0  -7   92.33    4.78
  -1   0  -7   92.74    3.53
  -2   0  -7 2143.31   49.29
  -2   0  -7 2182.55   43.04
  -3   0  -7  366.39    8.88
  -3   0  -7  357.09   11.10
  -4   0  -7  231.95    6.40
  -4   0  -7  211.98    8.55
  -5   0  -7   -0.62    2.63
  -5   0  -7   -1.32    1.21
  -6   0  -7   94.22    6.78
  -6   0  -7   85.67    4.13
  -7   0  -7 1631.85   40.73
  -7   0  -7 1605.15   33.83
  -8   0  -7  236.63    7.81
  -8   0  -7  238.06   11.35
  -9   0  -7  191.06    7.12
  -9   0  -7  181.45   10.31
 -10   0  -7  176.11    7.13
 -10   0  -7  163.95   10.56
 -11   0  -7  172.24   11.61
 -11   0  -7  182.80    7.63
 -12   0  -7   16.30    6.19
 -13   1   7   -1.64    5.31
 -12   1   7    2.00    4.99
 -11   1   7  111.96    9.09
 -10   1   7  239.25   11.71
  -9   1   7   66.89    6.71
  -8   1   7  534.14   17.21
  -7   1   7   96.70    6.47
  -6   1   7 1868.51   44.82
  -5   1   7   94.81    5.26
  -4   1   7   66.96    4.54
  -3   1   7   77.91    4.25
   2  -1  -7   90.94    3.59
  -2   1   7   94.72    4.40
   1  -1  -7  557.24   12.37
   1  -1  -7  554.87   15.03
   0  -1  -7  147.90    4.49
   0  -1  -7  152.72    6.21
  -1  -1  -7 3642.26   69.77
  -1  -1  -7 3521.15   79.64
  -2  -1  -7 1481.90   34.31
  -2  -1  -7 1428.99   29.29
  -3  -1  -7 1467.88   29.65
  -3  -1  -7 1464.88   35.13
  -4  -1  -7  304.98    7.79
  -4  -1  -7  303.78   10.73
  -5  -1  -7  495.24   15.16
  -5  -1  -7  476.05   11.35
  -6  -1  -7  392.25   13.70
  -6  -1  -7  385.81    9.81
  -7  -1  -7   59.43    5.67
  -7  -1  -7   55.74    3.61
  -8  -1  -7   49.10    3.81
  -8  -1  -7   53.13    6.01
  -9  -1  -7    7.13    4.54
  -9  -1  -7    4.57    2.34
 -10  -1  -7  210.16   11.66
 -10  -1  -7  216.57    7.79
 -11  -1  -7  221.40   12.48
 -12  -1  -7  135.39   10.90
 -13  -1  -7   91.62    9.89
 -14  -1  -7   57.94    9.13
 -13   2   7   50.80    7.63
 -12   2   7   -2.96    4.83
 -11   2   7   89.60    8.38
 -10   2   7   38.03    5.69
  -9   2   7  300.02   12.23
  -8   2   7  101.12    7.06
  -7   2   7  100.24    6.26
  -6   2   7 3739.72   84.96
  -5   2   7   70.04    4.62
  -4   2   7   70.43    4.71
  -3   2   7  337.19   10.35
   1  -2  -7  990.52   20.71
   1  -2  -7 1011.04   24.66
   0  -2  -7   26.15    2.92
   0  -2  -7   24.88    2.00
  -1  -2  -7 2148.91   49.80
  -1  -2  -7 2213.42   42.98
  -2  -2  -7  661.94   17.50
  -2  -2  -7  679.21   14.21
  -3  -2  -7   15.40    2.78
  -3  -2  -7   19.78    1.60
  -4  -2  -7  264.93    6.72
  -4  -2  -7  260.27    9.98
  -5  -2  -7  986.01   26.28
  -5  -2  -7 1001.28   20.83
  -6  -2  -7  716.95   20.86
  -6  -2  -7  712.01   15.79
  -7  -2  -7  667.75   15.24
  -7  -2  -7  668.36   20.32
  -8  -2  -7   31.94    5.18
  -8  -2  -7   34.77    2.97
  -9  -2  -7 1163.81   24.89
  -9  -2  -7 1097.97   31.61
 -10  -2  -7    0.94    4.60
 -10  -2  -7   -5.06    2.05
 -11  -2  -7   19.21    5.88
 -12  -2  -7    9.86    5.89
 -13  -2  -7  135.13   11.67
 -14  -2  -7   35.07    8.37
 -13   3   7  178.51   12.06
 -12   3   7  225.36   12.62
 -11   3   7  257.25   12.70
 -10   3   7    2.26    4.17
  -9   3   7  131.46    8.30
  -8   3   7   22.81    4.19
  -7   3   7  935.17   25.31
  -6   3   7  367.84   12.16
  -5   3   7  664.83   18.27
  -4   3   7   38.63    3.87
  -3   3   7 2170.33   49.77
   2  -3  -7   76.50    4.81
   1  -3  -7 1972.54   45.78
   0   3   7  513.34    9.68
   0  -3  -7  495.04   14.22
   0  -3  -7  533.66   11.30
  -1  -3  -7 2767.96   54.77
  -1  -3  -7 2810.77   63.43
   1   3   7 2848.21   50.47
  -2  -3  -7 2614.42   59.91
  -2  -3  -7 2656.82   51.42
  -3  -3  -7  134.93    6.64
  -3  -3  -7  126.55    3.74
  -4  -3  -7 1960.89   38.61
  -4  -3  -7 1947.51   46.57
  -5  -3  -7  820.47   22.63
  -5  -3  -7  821.54   17.28
  -6  -3  -7  238.75    6.45
  -6  -3  -7  228.40    9.99
  -7  -3  -7   20.07    2.11
  -7  -3  -7   18.05    4.32
  -8  -3  -7    0.56    1.59
  -8  -3  -7    1.04    3.33
  -9  -3  -7  196.52   10.64
  -9  -3  -7  209.33    6.86
 -10  -3  -7   84.40    8.64
 -11  -3  -7 1413.90   39.89
 -12  -3  -7   -2.10    4.99
 -13  -3  -7   81.15    9.71
 -14  -3  -7   78.07   10.09
 -13   4   7   67.84    8.46
 -12   4   7  390.93   16.73
 -11   4   7    0.76    4.86
 -10   4   7   -2.24    3.92
  -9   4   7   71.63    6.64
  -8   4   7   85.15    6.14
  -7   4   7    4.12    2.85
  -6   4   7 1189.90   30.19
  -5   4   7  105.44    5.80
  -4   4   7   68.17    4.62
  -3   4   7   91.00    4.70
   2  -4  -7  287.08   10.03
   1  -4  -7    5.53    2.28
   0  -4  -7   30.34    2.98
   0   4   7   26.92    1.35
  -1  -4  -7 2700.09   63.97
   1   4   7 2924.82   50.98
  -1  -4  -7 2878.51   55.18
  -2  -4  -7  269.81    6.21
  -2  -4  -7  265.45    9.23
   2   4   7  271.80    5.85
  -3  -4  -7 2574.22   49.58
  -3  -4  -7 2517.88   58.77
  -4  -4  -7  162.72    8.10
  -4  -4  -7  159.50    4.28
  -5  -4  -7  365.32   12.92
  -5  -4  -7  357.52    8.27
  -6  -4  -7 1026.57   21.18
  -6  -4  -7 1023.95   27.93
  -7  -4  -7  423.57    9.94
  -7  -4  -7  400.92   14.84
  -8  -4  -7  846.26   18.50
  -8  -4  -7  852.34   25.28
  -9  -4  -7   33.59    5.92
 -10  -4  -7  136.26   10.10
 -11  -4  -7  294.15   14.67
 -12  -4  -7   -2.29    5.38
 -13  -4  -7   -7.04    5.47
 -14  -4  -7  346.71   18.31
 -13   5   7  198.84   12.62
 -13   5   7  183.13    9.45
 -12   5   7   72.66    8.11
 -11   5   7    1.19    4.60
 -10   5   7  477.54   17.30
  -9   5   7   32.63    5.05
  -8   5   7   50.43    5.20
  -7   5   7   14.35    3.38
  -6   5   7  592.90   17.28
  -5   5   7  183.66    7.50
  -4   5   7   49.53    4.15
  -3   5   7   20.07    2.66
   2  -5  -7  519.63   15.18
   1  -5  -7  948.17   24.06
   0  -5  -7  144.63    6.30
   1   5   7    2.17    0.82
  -1  -5  -7   -0.63    1.87
   2   5   7  532.97   10.63
  -2  -5  -7  530.43   14.99
  -2  -5  -7  528.14   11.02
  -3  -5  -7   23.33    1.50
  -3  -5  -7   27.52    3.51
   3   5   7   27.97    1.97
  -4  -5  -7   22.58    4.02
  -4  -5  -7   20.53    1.48
  -5  -5  -7  171.67    8.41
  -5  -5  -7  171.14    4.40
  -6  -5  -7 3503.67   66.20
  -6  -5  -7 3302.77   78.99
  -7  -5  -7 1439.24   37.46
  -7  -5  -7 1422.77   28.91
  -8  -5  -7  132.90    8.97
  -9  -5  -7   37.14    6.19
 -10  -5  -7  597.70   21.06
 -11  -5  -7  140.35   10.81
 -12  -5  -7   86.89    9.47
 -13  -5  -7    9.29    6.63
 -14  -5  -7    9.20    7.14
 -13   6   7  327.34   16.22
 -12   6   7  136.84   10.74
 -12   6   7  144.30    8.02
 -11   6   7  170.70   10.59
 -10   6   7  724.73   23.01
  -9   6   7   58.87    6.00
  -8   6   7   18.69    3.95
  -7   6   7  190.85    8.77
  -6   6   7  748.63   20.71
  -5   6   7   24.56    3.24
  -4   6   7   -0.38    1.90
  -3   6   7 1668.21   39.15
   2  -6  -7  830.18   21.96
   1  -6  -7  476.37   14.07
   0  -6  -7   -4.53    1.98
  -1  -6  -7   -6.03    1.90
   1   6   7    3.21    1.00
  -2  -6  -7   25.24    3.37
   2   6   7   21.89    1.60
   3   6   7  428.06    9.37
  -3  -6  -7  444.69   13.95
   4   6   7    5.21    1.38
  -4  -6  -7    4.24    0.74
  -4  -6  -7    2.80    3.33
  -5  -6  -7  160.19    3.92
  -5  -6  -7  173.00    8.43
  -6  -6  -7   -0.37    3.45
  -6  -6  -7    1.77    0.90
  -7  -6  -7  685.67   21.27
  -8  -6  -7   65.64    6.73
  -9  -6  -7  705.31   23.15
 -10  -6  -7    7.11    4.66
 -11  -6  -7  187.95   12.28
 -12  -6  -7  374.34   17.69
 -13  -6  -7    5.52    6.38
 -14  -6  -7   78.90   10.36
 -12   7   7   99.47    7.44
 -11   7   7  105.81    7.07
 -11   7   7   88.87    8.41
 -10   7   7   -2.40    3.82
  -9   7   7   32.51    5.01
  -8   7   7   25.99    4.33
  -7   7   7    0.01    3.02
  -6   7   7  674.81   19.15
  -5   7   7  144.65    6.81
  -4   7   7   39.98    4.14
  -3   7   7  891.74   22.56
   2  -7  -7  554.99   16.09
   1  -7  -7 1574.12   37.83
   0  -7  -7  218.96    8.41
   1   7   7  230.62    5.80
  -1  -7  -7  243.14    8.74
  -2  -7  -7  284.20   10.19
   2   7   7  301.55    6.95
  -3  -7  -7  826.23   22.46
   3   7   7  839.78   16.60
   4   7   7   64.25    3.04
  -4  -7  -7   71.18    6.18
  -5  -7  -7  662.06   19.75
   5   7   7  640.75   13.86
  -6  -7  -7  277.15   11.54
  -7  -7  -7 1193.87   32.76
  -8  -7  -7  309.93   13.64
  -9  -7  -7  415.07   16.46
 -10  -7  -7  109.12    9.73
 -11  -7  -7  331.11   15.96
 -12  -7  -7  106.19   10.63
 -13  -7  -7    4.25    6.70
 -14  -7  -7   12.24    7.41
 -12   8   7    3.81    4.44
 -11   8   7   17.53    4.59
 -10   8   7  159.89    8.10
 -10   8   7  161.84   10.14
  -8   8   7   43.40    5.19
  -7   8   7  209.85    9.23
  -6   8   7 1639.82   40.04
  -5   8   7    0.86    2.13
  -4   8   7  816.35   21.32
  -3   8   7 1139.59   27.90
   2  -8  -7  126.19    6.82
   1  -8  -7   23.18    3.28
   0  -8  -7  253.31    9.26
   1   8   7  321.63    7.58
  -1  -8  -7  325.03   10.76
  -2  -8  -7 1272.92   31.43
   2   8   7 1254.88   24.21
  -3  -8  -7    8.94    3.22
   3   8   7    8.56    1.49
  -4  -8  -7  266.23   10.81
   4   8   7  251.74    6.75
  -5  -8  -7 1329.13   34.57
   5   8   7 1330.66   26.05
   6   8   7   87.12    4.09
  -6  -8  -7   90.17    7.31
  -7  -8  -7  319.67   13.22
  -8  -8  -7   -3.25    4.09
  -9  -8  -7  236.53   12.56
 -10  -8  -7    3.89    4.67
 -11  -8  -7   66.48    7.96
 -12  -8  -7  477.49   20.21
 -13  -8  -7   19.62    7.43
 -14  -8  -7   83.54   11.02
 -11   9   7    1.22    4.25
 -10   9   7  269.73   10.71
  -9   9   7   89.00    6.45
  -8   9   7  271.98   11.23
  -7   9   7  438.20   14.62
  -6   9   7  281.32   10.58
  -5   9   7  433.21   13.52
  -4   9   7  142.91    6.48
  -3   9   7  100.92    5.12
   2  -9  -7  279.78   10.38
   1  -9  -7 1547.80   37.54
   0  -9  -7   10.36    2.79
   1   9   7   36.04    2.54
  -1  -9  -7   42.05    4.14
   2   9   7    7.69    1.09
   2   9   7    7.07    1.60
  -2  -9  -7    6.79    2.85
   3   9   7  454.36   10.42
  -3  -9  -7  437.39   14.56
   3   9   7  480.75    9.46
  -4  -9  -7  800.99   22.74
   4   9   7  790.07   16.55
  -5  -9  -7   54.48    5.39
   5   9   7   53.48    3.31
  -6  -9  -7   30.17    4.96
   6   9   7   34.50    2.76
  -7  -9  -7 1669.11   43.39
  -8  -9  -7    4.22    4.16
  -9  -9  -7  202.98   11.50
 -10  -9  -7  249.25   13.52
 -11  -9  -7   93.66    9.49
 -12  -9  -7  399.91   18.80
 -13  -9  -7    9.25    6.74
 -14  -9  -7   19.89    8.18
 -11  10   7   17.04    5.06
 -10  10   7  225.11   10.07
  -9  10   7   89.15    6.34
  -8  10   7   92.72    6.15
  -7  10   7   -3.60    2.67
  -6  10   7  176.95    8.28
  -5  10   7  265.97    9.83
  -4  10   7  607.96   16.97
  -3  10   7  807.21   20.89
   2 -10  -7   12.99    3.43
   1 -10  -7  394.87   12.68
   0 -10  -7   77.15    5.03
   1  10   7  878.93   17.99
  -1 -10  -7  887.24   23.10
   1  10   7  870.45   18.25
  -2 -10  -7    2.53    2.90
   2  10   7    2.77    1.49
   2  10   7    7.13    1.18
  -3 -10  -7  445.67   15.03
   3  10   7  476.51   10.96
   3  10   7  498.06    9.97
   4  10   7   45.19    3.04
  -4 -10  -7   54.37    5.38
  -5 -10  -7   50.10    5.65
   5  10   7   55.27    3.45
   6  10   7  207.55    6.64
  -6 -10  -7  217.88   10.76
  -7 -10  -7  303.35   13.49
   7  10   7  297.67    8.53
  -8 -10  -7  401.72   16.35
  -9 -10  -7  294.28   14.49
 -10 -10  -7 1184.52   35.27
 -11 -10  -7  385.24   17.94
 -12 -10  -7  509.09   21.59
 -13 -10  -7   67.97    9.84
 -14 -10  -7   52.14    9.95
 -10  11   7   84.95    7.00
  -9  11   7  464.60   14.73
  -8  11   7   55.79    5.28
  -7  11   7  456.38   13.56
  -6  11   7  119.90    6.27
  -5  11   7  852.36   20.44
  -4  11   7  131.16    5.81
  -4  11   7  113.68    6.14
  -3  11   7    8.08    2.34
  -3  11   7   12.82    2.55
  -2  11   7   92.86    4.39
   1 -11  -7 1141.60   29.70
  -1  11   7 1233.51   25.19
   0 -11  -7 1208.20   30.67
   0  11   7 1244.58   25.49
  -1 -11  -7  161.18    7.65
   1  11   7  180.28    5.70
   1  11   7  168.43    5.06
   2  11   7  159.77    4.52
   2  11   7  155.89    5.36
  -2 -11  -7  159.53    7.63
   3  11   7  303.59    8.08
  -3 -11  -7  298.19   11.33
   4  11   7    7.05    1.65
  -4 -11  -7    7.11    3.58
   5  11   7  354.75    9.24
  -5 -11  -7  341.86   13.58
   6  11   7  210.91    6.83
  -6 -11  -7  197.89   10.31
   7  11   7   55.64    3.89
  -7 -11  -7   44.50    5.92
  -8 -11  -7   25.99    5.89
   8  11   7   26.91    3.23
  -9 -11  -7    2.97    4.44
 -10 -11  -7  154.47   11.52
 -11 -11  -7  257.90   14.43
 -12 -11  -7   58.72    8.99
 -13 -11  -7   27.75    8.11
 -14 -11  -7   83.73   11.35
 -10  12   7   22.04    4.88
  -9  12   7   28.35    4.98
  -8  12   7  179.35    8.60
  -7  12   7  287.81   10.57
  -6  12   7    2.48    2.92
  -5  12   7    8.45    3.02
  -4  12   7  142.96    6.40
  -3  12   7  637.07   15.62
  -2  12   7    0.84    1.99
  -1  12   7    2.88    1.80
   0  12   7  737.13   16.49
   0 -12  -7  746.32   20.44
  -1 -12  -7  534.93   15.83
   1  12   7  523.69   12.03
   1  12   7  520.27   12.34
   2  12   7 1133.83   23.20
  -2 -12  -7 1136.79   29.21
   2  12   7 1137.50   23.29
  -3 -12  -7   36.84    4.64
   3  12   7   39.60    3.20
   4  12   7   56.29    3.67
  -4 -12  -7   58.40    5.78
   5  12   7  193.91    6.53
  -5 -12  -7  180.18   10.02
   6  12   7   36.88    3.11
  -6 -12  -7   36.93    5.89
   7  12   7    1.29    2.12
  -7 -12  -7    1.93    4.61
  -8 -12  -7  612.29   21.49
   8  12   7  632.83   15.22
  -9 -12  -7  138.21   10.05
 -10 -12  -7  202.46   12.81
 -11 -12  -7   83.44    9.63
 -12 -12  -7   70.57    9.73
 -13 -12  -7   45.47    9.08
  -9  13   7    9.77    4.35
  -8  13   7    9.56    4.30
  -7  13   7   15.98    4.07
  -6  13   7  202.66    8.56
  -5  13   7  647.93   17.03
  -4  13   7    1.24    2.67
  -3  13   7  370.76   10.75
  -2  13   7  204.66    7.16
  -1  13   7  296.47    8.52
   0  13   7   14.69    2.28
   0 -13  -7   13.05    3.16
   1  13   7  164.11    6.04
   1  13   7  192.45    5.69
  -1 -13  -7  151.21    7.65
  -2 -13  -7  274.77   10.33
   2  13   7  241.01    7.62
  -3 -13  -7  587.31   18.02
   3  13   7  588.03   13.74
   4  13   7  951.88   20.50
  -4 -13  -7  967.27   26.88
  -5 -13  -7  932.89   27.10
   5  13   7  927.75   20.10
   6  13   7   84.02    4.73
  -6 -13  -7   83.57    8.09
   7  13   7   94.70    5.04
  -7 -13  -7  100.75    8.88
   8  13   7  327.56    9.85
  -8 -13  -7  349.70   15.40
   9  13   7  284.85    9.51
  -9 -13  -7  290.55   14.61
 -10 -13  -7  373.76   17.31
 -11 -13  -7  314.76   16.47
 -12 -13  -7  125.03   11.23
 -13 -13  -7   25.37    8.49
  -9  14   7  213.02   10.30
  -8  14   7  222.82   10.11
  -7  14   7  273.02   10.74
  -6  14   7  303.64   10.98
  -5  14   7  251.68    9.50
  -4  14   7  231.22    8.61
  -3  14   7    2.60    2.58
  -2  14   7  149.01    6.28
  -1  14   7   88.17    4.78
   0  14   7   68.37    4.13
  -1 -14  -7   21.81    3.89
   1  14   7   28.03    2.95
   2  14   7    1.72    1.95
  -2 -14  -7   -8.06    2.59
  -3 -14  -7   38.21    5.08
   3  14   7   42.18    3.59
  -4 -14  -7   22.62    4.53
   5  14   7   36.16    3.41
   6  14   7  102.28    5.32
  -6 -14  -7  111.74    8.95
  -7 -14  -7    1.20    4.71
   7  14   7    2.74    2.33
   8  14   7   10.81    2.92
  -8 -14  -7   29.55    6.26
   9  14   7  167.15    7.17
  -9 -14  -7  178.66   11.84
 -10 -14  -7   13.87    6.39
 -11 -14  -7   11.61    6.67
 -12 -14  -7    0.97    6.34
 -13 -14  -7    1.31    7.07
  -8  15   7   25.37    5.14
  -7  15   7   39.95    5.34
  -6  15   7   -3.92    3.14
  -5  15   7  370.22   12.21
  -4  15   7  223.52    8.73
  -3  15   7  395.96   11.79
  -2  15   7    0.31    2.42
  -1  15   7   62.75    4.58
   0  15   7  104.09    5.31
   0  15   7  106.79    5.03
   1  15   7  365.07   10.26
   2  15   7   -1.48    2.03
  -3 -15  -7   50.54    5.58
   3  15   7   59.78    4.26
   4  15   7 1084.69   23.25
  -4 -15  -7 1067.36   29.50
   5  15   7   36.26    3.61
  -5 -15  -7   40.59    6.15
   6  15   7   41.47    3.83
  -6 -15  -7   47.16    6.53
  -7 -15  -7    8.90    5.43
   7  15   7    2.71    2.43
  -8 -15  -7  179.05   11.69
   8  15   7  175.36    7.22
  -9 -15  -7  132.92   10.84
   9  15   7  144.68    6.76
 -10 -15  -7  292.52   15.46
 -11 -15  -7  788.38   28.42
 -12 -15  -7    9.68    7.05
 -13 -15  -7   11.21    7.76
  -8  16   7   29.63    5.42
  -7  16   7   50.19    5.91
  -6  16   7  102.40    7.08
  -5  16   7  486.34   14.74
  -4  16   7    3.68    3.33
  -3  16   7  271.67    9.54
  -2  16   7   36.09    3.89
  -1  16   7   45.19    3.91
   0  16   7   90.74    5.20
   1  16   7    3.09    2.36
   2  16   7   91.34    5.17
   3  16   7  208.56    7.50
   4  16   7    8.14    2.69
   5  16   7  405.42   11.52
  -5 -16  -7  411.80   15.86
  -6 -16  -7   36.82    6.22
   6  16   7   35.93    3.86
  -7 -16  -7  220.93   12.62
   7  16   7  204.23    7.97
  -8 -16  -7  141.76   11.32
   8  16   7  143.67    6.76
   9  16   7  274.17    9.63
  -9 -16  -7  267.47   14.64
 -10 -16  -7  216.56   13.76
  10  16   7  221.84    8.82
 -11 -16  -7  144.25   12.62
 -12 -16  -7   29.61    8.65
 -13 -16  -7  363.29   19.99
  -7  17   7   66.33    6.63
  -6  17   7  142.76    8.32
  -5  17   7   90.93    6.64
  -4  17   7   37.84    4.73
  -3  17   7   11.06    3.47
  -2  17   7   95.95    5.94
   0  17   7  307.33    9.84
   1  17   7   -0.23    2.49
   2  17   7  143.05    6.52
   3  17   7   85.38    5.19
   4  17   7    4.07    2.64
   5  17   7   40.51    4.02
   6  17   7  506.25   13.81
  -7 -17  -7  278.14   14.34
   7  17   7  294.86    9.93
  -8 -17  -7  435.10   18.45
   8  17   7  454.07   13.08
  -9 -17  -7   16.12    6.82
   9  17   7   14.14    3.41
 -10 -17  -7    5.09    6.35
  10  17   7    3.83    3.18
 -11 -17  -7   53.82    9.06
 -12 -17  -7  445.19   21.29
  -6  18   7   95.62    7.36
  -5  18   7    3.71    3.77
  -4  18   7  346.33   12.12
  -3  18   7  153.76    7.63
   0  18   7  138.79    6.47
   1  18   7  258.57    9.10
   2  18   7  370.28   11.32
   3  18   7  154.70    6.99
   4  18   7  420.18   12.33
   5  18   7   79.69    5.55
   6  18   7   10.52    3.16
   7  18   7    0.18    2.97
   8  18   7   66.07    5.31
   9  18   7    0.90    2.88
  10  18   7  474.48   14.18
 -10 -18  -7  442.55   20.48
 -11 -18  -7  123.41   12.28
 -12 -18  -7    5.62    7.06
  -6  19   7  132.89    8.49
  -5  19   7  196.57    9.63
  -4  19   7   73.82    6.37
  -1  19   7  182.40    8.05
   0  19   7   15.15    3.46
   1  19   7   -3.94    2.44
   2  19   7   38.35    4.15
   3  19   7  124.27    6.44
   4  19   7  461.15   13.33
   5  19   7  350.72   11.36
   6  19   7  195.62    8.09
   7  19   7    0.95    3.00
   8  19   7   12.99    3.62
   9  19   7  407.25   13.06
  10  19   7  128.92    7.40
  -5  20   7   74.71    6.80
  -1  20   7   12.57    3.69
   0  20   7   55.98    5.06
   1  20   7   -3.75    2.65
   2  20   7   80.76    5.68
   3  20   7   37.76    4.29
   4  20   7   32.08    4.26
   5  20   7   38.60    4.55
   6  20   7    0.77    2.98
   7  20   7   32.45    4.38
   8  20   7   10.86    3.38
   9  20   7    2.31    3.31
  -2  21   7   15.20    4.53
  -1  21   7  134.54    7.66
   0  21   7   12.96    3.82
   1  21   7   56.56    5.24
   2  21   7   -4.20    2.94
   3  21   7   38.41    4.50
   4  21   7   16.13    3.82
   5  21   7   35.58    4.72
   6  21   7   35.75    4.69
   7  21   7    7.97    3.58
   8  21   7   91.16    6.68
   0  22   7  120.18    7.42
   1  22   7   32.93    4.73
   2  22   7  106.46    7.01
   3  22   7  101.43    6.71
   4  22   7   12.81    3.97
   5  22   7    2.22    3.54
   6  22   7   -5.86    3.17
   7  22   7  102.38    7.10
   3  19  -8  117.51    7.34
   2  19  -8  -11.11    3.78
   1  19  -8  368.59   13.04
   5  18  -8   13.71    3.88
   4  18  -8  100.82    6.70
   3  18  -8    5.12    3.51
   2  18  -8  -12.49    2.98
   1  18  -8   94.43    6.99
   0  18  -8   78.10    6.37
   0  18  -8   82.84    6.96
  -1  18  -8  353.48   13.15
  -1  18  -8  354.23   12.67
   6  17  -8    7.78    3.58
   5  17  -8   66.21    5.65
   4  17  -8   91.99    6.51
   3  17  -8   -7.06    3.06
   2  17  -8  -11.55    2.81
   1  17  -8  180.08    8.51
   1  17  -8  177.28    8.81
   0  17  -8  463.17   15.00
   0  17  -8  473.75   14.34
  -1  17  -8  542.07   16.67
  -1  17  -8  536.30   15.68
  -2  17  -8   20.03    4.68
  -2  17  -8   10.85    4.25
   7  16  -8   27.53    4.11
   6  16  -8   96.44    6.47
   5  16  -8   83.40    5.84
   4  16  -8   37.14    4.28
   3  16  -8   -5.95    2.48
   2  16  -8    3.14    3.54
   2  16  -8   -3.69    2.89
   1  16  -8   93.34    6.51
   1  16  -8   95.30    6.36
   0  16  -8   82.44    6.11
   0  16  -8   76.38    6.10
  -1  16  -8   -3.72    3.24
  -1  16  -8    3.08    3.34
  -2  16  -8   -0.56    3.41
  -3  16  -8   72.02    6.51
  -4  16  -8  236.34   10.66
   8  15  -8   28.31    4.07
   7  15  -8  215.14    8.66
   6  15  -8    7.67    3.40
   5  15  -8   70.70    5.58
   4  15  -8  178.33    7.51
   3  15  -8    4.94    2.91
   3  15  -8    9.56    3.28
   2  15  -8    3.32    3.03
   2  15  -8    5.74    3.13
   1  15  -8  217.32    8.55
   1  15  -8  228.19    9.37
   0  15  -8  209.21    8.48
   0  15  -8  216.96    9.16
  -1  15  -8   74.32    5.73
  -1  15  -8   80.65    6.02
  -2  15  -8   19.59    4.13
  -3  15  -8  274.74   10.90
  -4  15  -8  226.70   10.07
  -5  15  -8   18.15    4.52
   9  14  -8  126.47    6.80
   8  14  -8  189.14    8.03
   7  14  -8   -3.17    2.75
   6  14  -8   -0.58    2.65
   5  14  -8  328.40   10.38
   4  14  -8    4.68    2.92
   4  14  -8    8.96    3.07
   3  14  -8  348.76   11.50
   3  14  -8  352.60   10.58
   2  14  -8   97.31    6.25
   2  14  -8  117.55    6.10
   1  14  -8  126.12    6.90
   1  14  -8  135.96    6.54
   0  14  -8   72.93    5.53
   0  14  -8   68.62    5.49
  -1  14  -8  247.99    9.82
  -2  14  -8   17.26    3.79
  -3  14  -8   50.79    5.20
  -4  14  -8   52.33    5.45
  -5  14  -8  111.61    7.40
  -6  14  -8   -5.02    3.36
   9  13  -8    8.90    3.10
   8  13  -8  148.70    6.99
   7  13  -8    0.95    2.49
   6  13  -8  175.55    7.15
   5  13  -8    2.29    2.71
   5  13  -8    1.34    2.53
   4  13  -8  410.38   12.65
   4  13  -8  431.85   11.82
   3  13  -8   28.15    3.82
   3  13  -8   30.56    3.46
   2  13  -8    2.43    2.65
   2  13  -8    3.23    2.82
   1  13  -8    2.10    2.65
   1  13  -8    7.28    2.83
   0  13  -8  171.44    7.70
   0  13  -8  171.84    7.07
  -1  13  -8   14.29    3.42
  -2  13  -8  141.75    7.24
  -3  13  -8    3.11    3.13
  -4  13  -8   18.89    3.95
  -5  13  -8   81.41    6.28
  -6  13  -8    5.64    3.90
  -7  13  -8   34.93    5.28
 -12 -12   8   28.72    7.27
   8  12  -8   -0.73    2.51
   7  12  -8   -6.20    2.07
   6  12  -8   75.33    4.79
   6  12  -8   70.86    5.33
   5  12  -8  221.14    7.67
   5  12  -8  220.55    8.44
   4  12  -8   93.61    5.75
   4  12  -8   85.01    5.13
   3  12  -8  171.35    6.66
   3  12  -8  189.59    7.67
   2  12  -8    7.04    2.71
   2  12  -8   -0.40    2.31
   1  12  -8  243.54    8.10
   1  12  -8  241.70    8.96
   0  12  -8  140.75    6.84
   0  12  -8  138.38    6.34
  -1  12  -8  656.75   17.47
  -2  12  -8    2.52    2.79
  -3  12  -8  156.33    7.59
  -4  12  -8  494.87   14.81
  -5  12  -8  218.42    9.28
  -6  12  -8    6.43    3.62
  -7  12  -8   73.63    6.57
 -12 -11   8    5.51    5.64
 -11 -11   8   -3.21    4.68
 -10 -11   8  274.49   13.72
  -9 -11   8  215.18   11.71
   8  11  -8  149.79    6.64
   7  11  -8   62.20    4.37
   6  11  -8  100.28    5.15
   6  11  -8   97.82    5.74
   5  11  -8  726.97   18.11
   5  11  -8  706.18   16.46
   4  11  -8  175.16    6.51
   4  11  -8  160.61    7.08
   3  11  -8  226.67    8.29
   3  11  -8  223.64    7.34
   2  11  -8   84.96    4.93
   2  11  -8   73.48    5.09
   1  11  -8  127.88    6.31
   1  11  -8  130.04    5.91
   0  11  -8   -0.75    2.23
   0  11  -8   -1.37    2.39
  -1  11  -8  240.33    8.86
  -2  11  -8  174.51    7.54
  -3  11  -8  411.07   12.64
  -4  11  -8  464.79   13.95
  -5  11  -8  172.65    8.04
  -6  11  -8  106.77    6.83
  -7  11  -8    9.07    3.84
  -8  11  -8   19.97    4.66
 -13 -10   8    3.73    6.20
 -12 -10   8   69.98    8.80
 -11 -10   8    9.75    5.58
 -10 -10   8   30.15    6.05
  -9 -10   8  142.37    9.42
   8  10  -8    9.24    2.84
  -8 -10   8   12.76    4.80
  -7 -10   8   46.24    5.55
   7  10  -8   42.85    3.72
   7  10  -8   48.99    4.16
   6  10  -8   -1.72    2.12
   6  10  -8    0.05    2.18
   5  10  -8  325.19   10.15
   5  10  -8  320.70    9.21
   4  10  -8    8.73    2.37
   4  10  -8    8.67    2.67
   3  10  -8  920.68   19.38
   3  10  -8  881.74   21.25
   2  10  -8   60.96    4.03
   2  10  -8   52.80    4.39
   1  10  -8  393.18   11.57
   1  10  -8  393.86   10.40
   0  10  -8   80.47    5.09
  -1  10  -8  218.05    8.25
  -2  10  -8    5.29    2.58
  -3  10  -8  513.97   14.39
  -4  10  -8    7.95    2.98
  -5  10  -8  163.51    7.66
  -6  10  -8  359.77   12.19
  -7  10  -8  202.70    9.12
  -8  10  -8   52.11    5.55
  -9  10  -8   75.25    6.74
 -13  -9   8   20.00    7.06
 -12  -9   8  103.46    9.96
 -11  -9   8   16.71    5.88
 -10  -9   8  512.62   19.06
  -9  -9   8   -3.04    3.96
  -8  -9   8   54.91    6.08
  -7  -9   8   50.67    5.79
   7   9  -8   53.44    4.11
   7   9  -8   49.09    4.32
  -6  -9   8  324.12   12.24
   6   9  -8  326.72    9.15
   6   9  -8  323.50   10.03
  -5  -9   8   63.61    5.66
   5   9  -8   66.67    4.11
   5   9  -8   65.04    4.56
   4   9  -8  191.42    6.33
   4   9  -8  201.85    7.40
   3   9  -8  474.41   12.89
   3   9  -8  477.21   11.38
   2   9  -8  271.64    8.99
   2   9  -8  290.63    8.01
   1   9  -8   14.97    2.77
   1   9  -8   13.26    2.38
   0   9  -8 1050.75   24.10
  -1   9  -8  473.33   13.09
  -2   9  -8   11.20    2.81
  -3   9  -8   19.61    3.27
  -4   9  -8  110.87    6.04
  -5   9  -8  183.91    7.94
  -6   9  -8   37.42    4.41
  -7   9  -8  192.53    8.58
  -8   9  -8   99.70    6.66
  -9   9  -8   20.64    4.58
 -10   9  -8  114.55    7.80
 -13  -8   8    8.60    6.10
 -12  -8   8   -1.36    4.83
 -11  -8   8  106.44    9.38
 -10  -8   8  566.13   20.13
  -9  -8   8   40.87    5.90
  -8  -8   8  355.56   14.13
   7   8  -8  904.56   19.75
  -7  -8   8  900.65   25.61
   7   8  -8  921.07   21.29
  -6  -8   8  290.13   11.35
   6   8  -8  293.26    9.19
   6   8  -8  291.47    8.33
   5   8  -8  700.15   15.30
   5   8  -8  690.27   16.99
  -5  -8   8  681.67   19.28
   4   8  -8  621.03   13.90
   4   8  -8  626.02   15.63
  -4  -8   8  632.53   17.34
   3   8  -8  607.70   15.06
  -3  -8   8  596.21   16.03
   3   8  -8  588.71   13.27
   1   8  -8   25.31    2.48
   1   8  -8   27.21    3.02
   0   8  -8   12.17    2.43
  -1   8  -8   55.78    4.21
  -2   8  -8   15.00    2.81
  -3   8  -8  251.31    8.62
  -4   8  -8   39.72    3.87
  -5   8  -8   80.63    5.50
  -6   8  -8  219.52    8.69
  -7   8  -8   98.36    6.23
  -8   8  -8    6.78    3.31
  -9   8  -8   47.19    5.22
 -10   8  -8  340.10   12.60
 -13  -7   8   12.42    6.39
 -12  -7   8   -1.97    4.80
 -11  -7   8   -1.60    4.74
 -10  -7   8   29.22    5.59
  -9  -7   8  123.94    8.74
  -8  -7   8   44.30    5.86
  -7  -7   8   12.07    3.90
   6   7  -8  144.51    5.37
  -6  -7   8  144.19    7.71
   6   7  -8  145.40    6.17
   5   7  -8   -0.96    1.45
  -5  -7   8   -1.06    2.39
   5   7  -8   -0.39    1.81
   4   7  -8    5.15    2.03
   4   7  -8    7.28    1.86
  -4  -7   8    4.84    2.43
   3   7  -8  183.57    5.52
   3   7  -8  171.09    6.47
  -3  -7   8  173.83    6.79
   2   7  -8    4.59    1.97
   2   7  -8    6.75    1.53
  -2  -7   8    5.53    1.88
   1   7  -8  461.82   10.52
   1   7  -8  452.30   12.10
   0   7  -8  285.06    8.84
  -1   7  -8  409.22   11.32
  -2   7  -8   40.98    3.74
  -3   7  -8    6.46    2.27
  -4   7  -8  104.89    5.63
  -5   7  -8  484.69   13.52
  -6   7  -8    4.70    2.74
  -7   7  -8   91.13    5.88
  -8   7  -8   56.28    5.06
  -9   7  -8  174.79    8.31
 -10   7  -8    8.17    3.83
 -11   7  -8   90.20    7.11
 -13  -6   8   -0.67    5.50
 -12  -6   8   -1.99    4.92
 -11  -6   8  994.40   30.35
 -10  -6   8   66.53    7.25
  -9  -6   8   23.66    5.15
  -8  -6   8   38.86    5.33
  -7  -6   8   44.89    5.11
   6   6  -8   64.20    4.23
  -6  -6   8   66.63    5.61
   5   6  -8  614.17   15.08
  -5  -6   8  600.81   17.42
   5   6  -8  626.88   13.44
  -4  -6   8 1722.37   40.63
   4   6  -8 1720.96   36.06
   4   6  -8 1704.43   32.61
   3   6  -8    4.90    1.50
   3   6  -8    6.78    2.01
  -3  -6   8    6.31    2.17
   2   6  -8  417.37    9.52
  -2  -6   8  429.38   11.76
   2   6  -8  416.85   11.18
   1   6  -8   81.45    4.40
   1   6  -8   84.06    3.59
  -1  -6   8   93.35    4.10
   0   6  -8  121.92    5.27
   0  -6   8  119.95    4.42
  -1   6  -8 2378.05   48.72
  -2   6  -8  717.72   17.14
  -4   6  -8    5.72    2.34
  -5   6  -8  954.84   22.32
  -6   6  -8   53.57    4.59
  -7   6  -8   15.80    3.31
  -8   6  -8    6.24    3.10
  -9   6  -8  122.06    6.83
 -10   6  -8   64.51    5.67
 -11   6  -8  174.29    8.67
 -12   6  -8   32.51    5.24
 -13  -5   8  116.96   10.79
 -12  -5   8   18.55    6.04
 -11  -5   8    7.31    5.09
 -10  -5   8  173.40   10.41
  -9  -5   8   -1.68    3.61
  -8  -5   8   35.84    5.06
  -7  -5   8 1123.71   29.85
  -6  -5   8  289.72   10.85
   5   5  -8   37.30    2.74
   5   5  -8   37.55    3.13
  -5  -5   8   35.88    3.78
   4   5  -8 3326.71   61.04
   4   5  -8 3323.94   66.87
  -4  -5   8 3384.00   75.61
   3   5  -8  584.46   12.29
  -3  -5   8  590.14   15.83
   3   5  -8  584.57   14.23
   2   5  -8 1941.79   40.76
   2   5  -8 2032.35   36.83
  -2  -5   8 1976.54   45.27
  -1  -5   8  210.99    6.86
   1   5  -8  211.10    6.91
   1   5  -8  209.33    5.59
   0  -5   8  111.84    4.35
   0   5  -8  110.92    4.91
  -1   5  -8  750.03   17.48
  -2   5  -8   15.87    2.39
  -2   5  -8   15.32    2.25
  -3   5  -8  177.52    6.42
  -4   5  -8  313.40    9.40
  -5   5  -8   63.27    4.48
  -6   5  -8  244.81    8.54
  -7   5  -8 1000.14   23.60
  -8   5  -8   -1.72    2.69
  -9   5  -8  116.40    6.54
 -10   5  -8   -2.45    2.75
 -11   5  -8   36.24    4.83
 -12   5  -8    2.76    3.64
 -13  -4   8   46.25    7.67
 -12  -4   8  269.58   14.02
 -11  -4   8 1273.92   36.28
 -10  -4   8  427.99   16.49
  -9  -4   8   97.38    7.71
  -8  -4   8   23.29    4.55
  -7  -4   8 1036.72   27.85
  -6  -4   8  307.32   11.16
  -5  -4   8   36.39    3.79
   5   4  -8   36.13    3.24
   4   4  -8 1023.14   19.75
  -4  -4   8  998.46   25.47
   3   4  -8    0.30    1.17
  -3  -4   8    3.83    2.01
   3   4  -8   -0.95    1.51
   2   4  -8 2398.68   42.66
  -2  -4   8 2326.67   52.78
   2   4  -8 2260.47   47.15
  -1  -4   8  595.78   15.46
   1   4  -8  625.81   14.53
   1   4  -8  614.26   12.33
  -1   4  -8    8.94    1.86
  -1   4  -8    7.81    2.03
  -2   4  -8  289.99    8.74
  -2   4  -8  276.25    8.19
  -3   4  -8  205.92    6.83
  -3   4  -8  204.70    7.04
  -4   4  -8  328.66   10.25
  -4   4  -8  322.90    9.37
  -5   4  -8  154.52    6.13
  -6   4  -8    5.45    2.31
  -7   4  -8  221.62    8.10
  -8   4  -8   37.68    3.98
  -9   4  -8   45.26    4.53
 -10   4  -8    6.11    3.20
 -11   4  -8  152.10    7.84
 -12   4  -8    2.63    3.35
 -13   4  -8   63.33    6.18
 -13  -3   8   17.90    6.44
 -12  -3   8    2.92    4.46
 -11  -3   8  450.51   17.71
 -10  -3   8    9.67    4.65
  -9  -3   8   -2.19    3.57
  -8  -3   8  775.17   22.84
  -7  -3   8  354.88   12.84
  -6  -3   8   94.91    5.81
  -5  -3   8  163.82    7.34
   4   3  -8    3.10    1.64
  -4  -3   8    0.33    1.84
   3   3  -8  304.27    8.63
   3   3  -8  315.02    7.00
  -3  -3   8  317.06    9.83
   2   3  -8  408.28   10.67
  -2  -3   8  435.44   11.96
   2   3  -8  432.85    8.84
  -1  -3   8  833.76   20.35
   1   3  -8  829.82   18.47
   1   3  -8  832.84   15.91
   0   3  -8  172.96    6.60
   0   3  -8  172.10    5.80
  -1   3  -8  745.41   19.21
  -1   3  -8  786.25   17.33
  -2   3  -8 1990.04   44.76
  -2   3  -8 1923.62   39.99
  -3   3  -8  641.76   15.07
  -3   3  -8  641.13   16.80
  -4   3  -8   49.56    4.36
  -4   3  -8   51.92    3.58
  -5   3  -8  268.41    8.25
  -5   3  -8  277.27    9.95
  -6   3  -8  440.35   11.94
  -6   3  -8  443.60   14.45
  -7   3  -8    0.63    2.21
  -7   3  -8    0.08    3.56
  -8   3  -8  234.58    8.51
  -9   3  -8   50.94    4.51
 -10   3  -8   86.92    5.88
 -11   3  -8   81.60    6.07
 -12   3  -8  145.97    7.88
 -13  -2   8   39.93    6.88
 -12  -2   8   94.29    9.17
 -11  -2   8    8.30    5.05
 -10  -2   8   23.40    4.69
  -9  -2   8  328.22   13.35
  -8  -2   8   42.36    5.23
  -7  -2   8  228.06    9.60
  -6  -2   8   10.06    2.94
  -5  -2   8  188.76    7.84
  -4  -2   8   82.54    4.84
   4   2  -8   83.20    4.02
  -3  -2   8  992.77   24.59
   2   2  -8   80.14    2.53
   2   2  -8   82.17    3.91
  -2  -2   8   78.15    4.25
   1   2  -8    2.93    1.50
   1   2  -8    5.79    0.91
   0   2  -8   17.07    1.96
   0   2  -8   14.00    2.37
  -1   2  -8 2381.31   48.69
  -1   2  -8 2480.83   55.07
  -2   2  -8    6.26    2.18
  -2   2  -8    2.67    1.54
  -3   2  -8   76.41    4.60
  -3   2  -8   72.98    3.72
  -4   2  -8    3.24    2.52
  -4   2  -8    6.79    1.83
  -5   2  -8   12.11    3.23
  -5   2  -8   19.47    2.38
  -6   2  -8   -0.24    2.93
  -6   2  -8    0.44    1.72
  -7   2  -8    8.40    4.12
  -7   2  -8   19.09    2.89
  -8   2  -8   82.96    5.10
  -8   2  -8   92.85    7.87
  -9   2  -8  373.93   11.47
  -9   2  -8  398.38   15.54
 -10   2  -8  203.39    8.16
 -11   2  -8   28.03    4.05
 -12   2  -8   13.92    3.75
 -13  -1   8  165.47   11.92
 -12  -1   8  228.19   12.96
 -11  -1   8  154.28   10.34
 -10  -1   8  439.85   16.38
  -9  -1   8   12.26    4.15
  -8  -1   8  233.78   10.51
  -7  -1   8   39.40    4.47
  -6  -1   8  529.82   16.00
  -5  -1   8   88.70    5.41
  -4  -1   8 1216.87   29.82
   3   1  -8   85.54    3.91
  -3  -1   8   81.35    4.48
   2   1  -8 1960.29   40.40
  -2  -1   8 2030.62   45.79
   1   1  -8  750.15   19.59
   1   1  -8  754.28   13.95
   1   1  -8  745.35   16.55
   0   1  -8  283.40    7.69
   0   1  -8  300.30    9.51
  -1   1  -8   -1.05    1.91
  -1   1  -8    0.36    1.25
  -2   1  -8   67.94    3.55
  -2   1  -8   74.99    4.49
  -3   1  -8  758.26   16.97
  -3   1  -8  767.64   19.80
  -4   1  -8  870.66   19.00
  -4   1  -8  849.01   22.50
  -5   1  -8  114.46    4.72
  -5   1  -8  122.27    6.91
  -6   1  -8  328.76   11.93
  -6   1  -8  314.42    9.04
  -7   1  -8  503.48   16.75
  -7   1  -8  496.56   12.88
  -8   1  -8  574.34   14.51
  -8   1  -8  551.64   18.56
  -9   1  -8   82.08    5.20
  -9   1  -8   87.17    8.28
 -10   1  -8   42.14    4.20
 -10   1  -8   41.19    6.36
 -11   1  -8    8.78    3.17
 -13   0   8   79.64    9.01
 -12   0   8  196.56   12.08
 -11   0   8   37.02    5.81
 -10   0   8   -0.97    4.09
  -9   0   8   51.93    5.80
  -8   0   8  182.14    9.28
  -7   0   8  350.65   12.48
  -6   0   8  224.13    9.15
  -5   0   8  713.58   19.41
  -3   0   8   21.05    2.69
   3   0  -8   16.76    2.00
  -2   0   8 1915.27   44.75
   2   0  -8 1980.97   39.40
   1   0  -8    3.51    1.29
   1   0  -8    6.63    2.25
   0   0  -8 1221.85   29.28
   0   0  -8 1191.49   24.99
  -1   0  -8  121.40    5.63
  -1   0  -8  114.36    4.19
  -2   0  -8  293.25    9.65
  -2   0  -8  304.58    7.82
  -3   0  -8 1267.14   31.20
  -3   0  -8 1302.07   26.67
  -4   0  -8   51.81    3.04
  -4   0  -8   47.07    4.62
  -5   0  -8  115.84    4.51
  -5   0  -8  113.33    6.74
  -6   0  -8 1148.62   24.83
  -6   0  -8 1166.99   30.35
  -7   0  -8  572.75   14.28
  -7   0  -8  606.61   18.88
  -8   0  -8   31.72    5.35
  -8   0  -8   41.96    3.55
  -9   0  -8    5.68    4.42
  -9   0  -8    1.68    2.26
 -10   0  -8   58.15    4.75
 -10   0  -8   61.09    7.47
 -11   0  -8   85.74    5.77
 -11   0  -8   96.97    9.12
 -12   0  -8  107.92   10.16
 -13   1   8   72.29    8.48
 -12   1   8  125.67   10.17
 -11   1   8  345.07   14.93
 -10   1   8  252.39   11.80
  -9   1   8  183.16    9.73
  -8   1   8  546.59   17.57
  -6   1   8  194.25    8.42
  -5   1   8  119.44    6.17
  -4   1   8  472.51   13.82
  -3   1   8  314.29    9.92
   2  -1  -8   48.41    2.94
  -2   1   8   43.67    3.65
   1  -1  -8  145.42    6.16
   1  -1  -8  145.86    4.74
   0  -1  -8  102.23    5.34
   0  -1  -8  101.89    3.77
  -1  -1  -8   16.94    1.67
  -1  -1  -8   15.26    2.58
  -2  -1  -8   31.09    2.42
  -2  -1  -8   24.31    3.23
  -3  -1  -8  380.32    9.11
  -3  -1  -8  355.37   11.63
  -4  -1  -8   60.26    5.16
  -4  -1  -8   55.34    2.99
  -5  -1  -8   50.17    3.14
  -5  -1  -8   53.55    5.42
  -6  -1  -8    0.70    2.94
  -6  -1  -8   -0.16    1.37
  -7  -1  -8   48.22    3.50
  -7  -1  -8   52.44    5.55
  -8  -1  -8  814.78   18.62
  -8  -1  -8  793.20   24.20
  -9  -1  -8  215.09   11.28
  -9  -1  -8  194.35    7.19
 -10  -1  -8  532.24   19.35
 -10  -1  -8  514.72   13.85
 -11  -1  -8  115.51    9.80
 -12  -1  -8   38.79    7.72
 -13  -1  -8   -0.83    6.28
 -13   2   8    4.07    5.84
 -12   2   8  280.00   14.20
 -11   2   8  157.43    9.80
 -10   2   8  114.93    8.52
  -9   2   8  107.45    7.70
  -8   2   8  407.77   14.41
  -7   2   8 2058.53   49.79
  -6   2   8  624.04   18.12
  -5   2   8   96.04    5.69
  -4   2   8  699.05   18.77
  -3   2   8  248.46    8.48
   1  -2  -8 2088.28   42.91
   1  -2  -8 2228.56   50.01
   0  -2  -8  488.37   10.93
   0  -2  -8  461.83   13.63
  -1  -2  -8  675.21   14.75
  -1  -2  -8  700.41   18.11
  -2  -2  -8  807.96   17.20
  -2  -2  -8  826.41   21.15
  -3  -2  -8   79.68    3.32
  -3  -2  -8   92.08    5.66
  -4  -2  -8  173.69    5.24
  -4  -2  -8  172.49    8.10
  -5  -2  -8  320.94    8.18
  -5  -2  -8  317.19   11.79
  -6  -2  -8 1691.39   42.57
  -6  -2  -8 1730.36   34.90
  -7  -2  -8   99.26    7.40
  -7  -2  -8   94.62    4.23
  -8  -2  -8  373.31   10.04
  -8  -2  -8  376.54   14.74
  -9  -2  -8    0.04    2.02
  -9  -2  -8    0.09    4.37
 -10  -2  -8   13.13    5.16
 -11  -2  -8   22.57    6.06
 -12  -2  -8    3.97    5.56
 -13  -2  -8    3.94    6.62
 -14  -2  -8  216.36   14.96
 -13   3   8   36.42    7.47
 -12   3   8   16.93    5.81
 -11   3   8   63.56    7.25
 -10   3   8   28.51    5.40
  -9   3   8  366.05   14.05
  -8   3   8  383.32   13.86
  -7   3   8   68.03    5.41
  -6   3   8  434.39   13.99
  -5   3   8  117.57    6.25
  -4   3   8   -1.72    1.89
  -3   3   8  315.86   10.02
   2  -3  -8 5291.38  117.77
   1  -3  -8  473.82   13.86
   0  -3  -8  833.48   22.02
   0  -3  -8  871.78   18.12
   0   3   8  884.82   15.93
  -1  -3  -8  344.34    8.06
  -1  -3  -8  338.23   10.76
  -2  -3  -8 2561.71   57.84
  -2  -3  -8 2479.56   49.38
  -3  -3  -8 3029.86   58.91
  -3  -3  -8 3004.31   68.93
  -4  -3  -8  311.90   11.33
  -4  -3  -8  297.97    7.44
  -5  -3  -8   15.66    3.82
  -5  -3  -8   15.10    1.66
  -6  -3  -8  621.95   13.89
  -6  -3  -8  618.78   19.15
  -7  -3  -8    1.12    1.40
  -7  -3  -8   -0.69    3.37
  -8  -3  -8  391.13   15.21
  -8  -3  -8  390.12   10.13
  -9  -3  -8  168.51   10.44
  -9  -3  -8  164.58    6.10
 -10  -3  -8  944.20   28.95
 -11  -3  -8   14.80    5.88
 -12  -3  -8   12.67    6.13
 -13  -3  -8   17.90    6.86
 -14  -3  -8  215.10   15.40
 -13   4   8   65.28    8.47
 -12   4   8   74.15    8.26
 -11   4   8    1.94    4.47
 -10   4   8    7.56    4.39
  -9   4   8  471.24   16.46
  -8   4   8   40.61    4.96
  -7   4   8   17.39    3.65
  -6   4   8 1529.02   37.66
  -5   4   8  487.35   14.66
  -4   4   8  851.08   22.15
  -3   4   8   82.27    4.84
   2  -4  -8  761.94   20.61
   1  -4  -8  248.08    9.22
   0   4   8 2672.32   47.47
   0  -4  -8 2606.90   60.47
  -1  -4  -8   88.96    3.11
  -1  -4  -8   78.81    4.83
   1   4   8   88.22    2.42
  -2  -4  -8  779.15   16.41
  -2  -4  -8  794.99   20.94
   2   4   8  808.39   15.11
  -3  -4  -8 1128.17   28.17
  -3  -4  -8 1080.92   22.24
  -4  -4  -8    6.19    3.26
  -4  -4  -8    4.81    1.13
  -5  -4  -8   83.92    3.21
  -5  -4  -8   92.34    6.44
  -6  -4  -8   26.99    2.05
  -6  -4  -8   27.56    4.61
  -7  -4  -8  286.17    7.52
  -7  -4  -8  285.47   12.26
  -8  -4  -8    3.22    3.77
  -8  -4  -8    7.08    1.79
  -9  -4  -8   14.20    5.28
 -10  -4  -8  347.58   15.49
 -11  -4  -8    1.97    5.31
 -12  -4  -8  294.08   15.44
 -13  -4  -8  312.22   16.64
 -14  -4  -8    5.61    7.24
 -13   5   8  245.79   14.07
 -12   5   8   26.52    6.58
 -11   5   8   13.19    5.37
 -10   5   8   -3.81    3.85
  -9   5   8   -6.48    3.09
  -8   5   8   12.78    3.74
  -7   5   8   96.18    6.51
  -6   5   8  354.48   12.02
  -5   5   8  186.05    7.93
  -4   5   8   41.30    4.11
  -3   5   8   43.24    3.93
   2  -5  -8    3.56    2.58
   1  -5  -8  381.52   12.13
   0  -5  -8   16.69    2.95
   0   5   8   16.59    1.22
   1   5   8 1901.71   34.73
  -1  -5  -8 1916.90   44.87
  -2  -5  -8  123.78    6.50
   2   5   8  131.16    3.53
  -2  -5  -8  132.04    3.71
  -3  -5  -8    3.79    0.99
   3   5   8    0.14    0.92
  -3  -5  -8    3.66    2.87
  -4  -5  -8   45.86    4.97
  -4  -5  -8   48.12    2.14
  -5  -5  -8 1011.49   20.49
  -5  -5  -8 1008.62   27.47
  -6  -5  -8 1946.95   38.22
  -6  -5  -8 1911.50   47.73
  -7  -5  -8  407.44    9.46
  -7  -5  -8  391.60   14.75
  -8  -5  -8  550.45   19.14
  -9  -5  -8   -0.84    4.38
 -10  -5  -8   58.64    7.35
 -11  -5  -8    5.29    5.52
 -12  -5  -8  112.30   10.55
 -13  -5  -8  148.34   12.31
 -14  -5  -8    2.92    7.01
 -13   6   8   -2.27    5.67
 -12   6   8    3.07    5.20
 -11   6   8  209.71   11.60
 -10   6   8    2.63    4.16
  -9   6   8  205.80   10.24
  -8   6   8   60.60    5.92
  -7   6   8    0.47    2.80
  -6   6   8    1.34    2.55
  -5   6   8  417.07   13.18
  -4   6   8  385.07   12.06
  -3   6   8   43.37    3.92
   2  -6  -8 1004.82   26.08
   1  -6  -8 1419.38   34.77
   0  -6  -8 1920.84   45.41
  -1  -6  -8   38.73    3.83
   1   6   8   34.36    1.92
  -2  -6  -8  267.64    9.83
   2   6   8  263.84    6.11
  -3  -6  -8 1889.88   43.84
   3   6   8 1784.87   33.50
  -3  -6  -8 1759.12   35.37
  -4  -6  -8   -2.95    2.97
  -4  -6  -8   -1.02    0.72
   4   6   8   -1.07    1.21
  -5  -6  -8  865.43   24.26
  -5  -6  -8  853.63   17.31
  -6  -6  -8 2240.77   54.24
  -6  -6  -8 2196.14   43.35
  -7  -6  -8  153.38    9.39
  -8  -6  -8  515.49   18.50
  -9  -6  -8  103.55    9.22
 -10  -6  -8  332.31   15.12
 -11  -6  -8  284.92   14.86
 -12  -6  -8    9.51    5.59
 -13  -6  -8    8.12    6.66
 -14  -6  -8   24.16    8.15
 -12   7   8   69.09    8.55
 -12   7   8   70.31    6.60
 -11   7   8   25.06    5.81
 -10   7   8    8.09    4.47
  -9   7   8   38.57    5.33
  -8   7   8  377.38   13.80
  -7   7   8  796.39   22.66
  -6   7   8   82.36    5.80
  -5   7   8  191.51    8.16
  -4   7   8   88.70    5.29
  -3   7   8  731.43   19.38
   2  -7  -8  199.86    8.56
   1  -7  -8  578.32   16.79
   0  -7  -8 1725.81   41.40
  -1  -7  -8  497.96   14.86
   1   7   8  505.01   10.48
  -2  -7  -8  412.41   13.19
   2   7   8  408.28    8.93
   3   7   8  129.25    4.06
  -3  -7  -8  133.56    7.33
   4   7   8  258.67    6.55
  -4  -7  -8  249.58   10.54
   5   7   8  508.85   11.40
  -5  -7  -8  503.87   16.56
  -6  -7  -8  178.30    9.67
  -7  -7  -8  308.07   13.32
  -8  -7  -8  690.07   22.59
  -9  -7  -8   83.91    8.23
 -10  -7  -8  574.41   21.06
 -11  -7  -8    6.00    5.16
 -12  -7  -8   33.23    7.61
 -13  -7  -8   -2.55    6.10
 -14  -7  -8  112.59   11.98
 -12   8   8   14.93    5.03
 -11   8   8  129.88    7.99
 -10   8   8    0.72    4.03
  -9   8   8  122.32    8.06
  -8   8   8    6.06    3.88
  -7   8   8  309.00   11.75
  -6   8   8   69.85    5.79
  -5   8   8 1296.78   32.36
  -4   8   8   38.62    3.68
  -3   8   8  477.10   13.90
   2  -8  -8   75.40    5.66
   1  -8  -8   80.84    5.62
   0  -8  -8  610.33   17.43
  -1  -8  -8   62.07    4.89
   1   8   8   62.69    2.92
  -2  -8  -8 1355.17   33.95
   2   8   8 1373.75   25.99
   3   8   8 1537.31   29.57
  -3  -8  -8 1592.00   38.83
   4   8   8 1990.52   37.75
  -4  -8  -8 2039.20   49.12
   5   8   8   43.12    2.88
  -5  -8  -8   43.44    5.29
  -6  -8  -8  120.86    8.44
  -7  -8  -8   24.57    5.24
  -8  -8  -8    1.26    3.85
  -9  -8  -8  471.43   18.54
 -10  -8  -8   -0.55    5.17
 -11  -8  -8    9.68    5.88
 -12  -8  -8  237.54   14.62
 -13  -8  -8   48.12    9.02
 -14  -8  -8  101.82   11.59
 -11   9   8   69.70    6.66
 -10   9   8   17.68    4.40
  -9   9   8   82.30    7.39
  -8   9   8  262.63   11.09
  -7   9   8   10.83    3.46
  -6   9   8   -0.10    2.83
  -5   9   8  589.64   17.09
  -4   9   8   74.11    5.00
  -3   9   8   74.59    4.70
   2  -9  -8  503.18   15.54
   1  -9  -8   27.71    3.71
   0  -9  -8    2.00    2.22
  -1  -9  -8    2.51    2.36
   1   9   8    0.74    1.31
  -2  -9  -8   -2.14    2.41
   2   9   8    0.32    1.24
   3   9   8  115.77    4.14
  -3  -9  -8  125.85    7.17
  -4  -9  -8   23.13    4.47
   4   9   8   31.42    2.38
   5   9   8  718.53   15.44
  -5  -9  -8  728.10   21.91
   6   9   8   28.41    2.55
  -6  -9  -8   25.61    5.11
  -7  -9  -8  245.15   11.75
  -8  -9  -8  405.99   16.20
  -9  -9  -8  221.05   12.56
 -10  -9  -8   14.36    5.88
 -11  -9  -8   29.86    7.24
 -12  -9  -8  149.11   12.40
 -13  -9  -8   14.67    7.33
 -14  -9  -8  163.10   13.62
 -11  10   8    8.00    4.82
 -10  10   8   17.32    4.64
  -9  10   8   82.52    6.34
  -8  10   8  248.58    9.51
  -7  10   8   56.70    5.84
  -6  10   8   94.44    6.36
  -5  10   8  662.79   18.78
  -4  10   8  274.91    9.90
  -3  10   8   48.74    4.12
   2 -10  -8  658.56   19.18
   1 -10  -8   83.15    5.89
   0 -10  -8 1197.12   30.29
   1  10   8  932.47   18.58
  -1 -10  -8  888.76   24.12
   2  10   8  134.29    4.69
  -2 -10  -8  137.75    7.42
  -3 -10  -8   58.06    5.54
   3  10   8   52.95    3.12
  -4 -10  -8  327.56   12.59
   4  10   8  322.91    8.38
  -5 -10  -8  174.46    9.62
   5  10   8  179.62    5.79
   6  10   8    1.14    1.71
  -6 -10  -8    2.11    3.88
   7  10   8  121.75    5.21
  -7 -10  -8  120.05    9.14
  -8 -10  -8  141.98   10.28
  -9 -10  -8  530.54   20.10
 -10 -10  -8   14.13    6.04
 -11 -10  -8  302.67   16.01
 -12 -10  -8    9.79    6.68
 -13 -10  -8   66.35    9.90
 -14 -10  -8   12.28    8.04
 -10  11   8    9.71    4.09
  -9  11   8   -6.43    3.10
  -8  11   8  203.29    8.82
  -7  11   8   59.94    5.41
  -6  11   8   -0.95    2.59
  -5  11   8  198.48    8.55
  -4  11   8  158.18    7.35
  -3  11   8  201.88    7.87
   2 -11  -8 1603.21   39.75
   0 -11  -8    0.45    2.72
  -1 -11  -8 1095.38   28.50
   1  11   8 1115.04   22.31
   1  11   8 1108.13   22.79
  -2 -11  -8 1806.80   43.44
   2  11   8 1761.49   34.22
   2  11   8 1790.28   35.35
   3  11   8  110.01    4.47
  -3 -11  -8  108.08    6.90
  -4 -11  -8   11.20    3.79
   4  11   8    6.83    1.75
  -5 -11  -8   81.46    7.27
   5  11   8   77.16    4.00
   6  11   8  369.99    9.80
  -6 -11  -8  378.75   14.98
  -7 -11  -8    9.98    5.01
   7  11   8   10.81    2.38
  -8 -11  -8    4.90    4.77
  -9 -11  -8   75.55    8.31
 -10 -11  -8   46.99    7.75
 -11 -11  -8   92.48   10.06
 -12 -11  -8  109.62   10.98
 -13 -11  -8   80.48   10.53
 -14 -11  -8  223.88   16.30
 -10  12   8  126.07    8.39
  -9  12   8    5.44    3.99
  -8  12   8  416.10   13.65
  -7  12   8   50.19    5.16
  -6  12   8   55.67    5.11
  -5  12   8   63.97    5.01
  -4  12   8  837.23   19.96
  -3  12   8   35.15    3.60
  -3  12   8   24.42    3.18
  -2  12   8   85.90    4.54
   2 -12  -8  107.66    6.85
  -1  12   8    5.37    1.96
   0 -12  -8  911.53   24.57
   0  12   8  922.89   19.80
   1  12   8 1451.25   28.30
   1  12   8 1434.30   29.12
  -1 -12  -8 1396.08   35.64
   2  12   8   92.42    4.32
  -2 -12  -8   76.51    6.19
  -3 -12  -8   12.07    3.63
   3  12   8   11.25    2.09
   4  12   8  167.03    5.83
  -4 -12  -8  169.56    9.39
  -5 -12  -8    5.13    4.43
   5  12   8    1.32    1.82
   6  12   8   28.66    3.01
  -6 -12  -8   37.31    5.99
   7  12   8    5.44    2.34
  -7 -12  -8    6.65    5.05
  -8 -12  -8   32.17    6.42
   8  12   8   37.36    3.52
  -9 -12  -8   74.78    8.04
 -10 -12  -8   27.38    6.31
 -11 -12  -8   10.47    5.80
 -12 -12  -8   80.22   10.04
 -13 -12  -8  121.21   12.48
  -9  13   8   33.71    5.40
  -8  13   8  474.07   15.18
  -7  13   8   82.95    6.28
  -6  13   8   44.96    4.80
  -5  13   8  140.64    7.00
  -4  13   8  521.44   14.11
  -3  13   8  152.18    6.45
  -2  13   8  270.79    8.43
  -1  13   8   83.16    4.38
   1 -13  -8   96.03    6.14
   0  13   8  127.48    4.87
   0 -13  -8  124.48    7.09
  -1 -13  -8  401.49   13.27
   1  13   8  377.33    9.95
   1  13   8  374.42    9.45
   2  13   8  181.63    6.27
  -2 -13  -8  176.06    8.40
   3  13   8   66.76    3.97
  -3 -13  -8   70.36    6.54
   4  13   8   77.24    4.33
  -4 -13  -8   76.30    6.82
  -5 -13  -8  549.31   18.70
   5  13   8  525.68   12.98
  -6 -13  -8  452.18   17.16
   6  13   8  449.81   11.72
  -7 -13  -8   41.59    6.60
   7  13   8   45.58    3.68
   8  13   8  291.79    9.11
  -8 -13  -8  278.78   14.28
  -9 -13  -8   -2.03    4.36
 -10 -13  -8  160.18   12.02
 -11 -13  -8   56.92    8.85
 -12 -13  -8   27.45    7.72
 -13 -13  -8  159.75   13.88
  -9  14   8   -3.25    3.92
  -8  14   8    3.61    4.05
  -7  14   8    2.08    3.76
  -6  14   8  668.25   18.28
  -5  14   8   36.53    4.58
  -4  14   8  381.89   11.68
  -3  14   8   91.86    5.43
  -2  14   8  671.34   16.44
  -1  14   8 1274.83   27.49
   0  14   8   30.00    2.86
   0  14   8   25.86    2.94
   1  14   8   84.83    4.54
  -1 -14  -8   65.20    5.85
  -2 -14  -8  361.86   12.90
   2  14   8  357.41    9.88
  -3 -14  -8   59.39    5.94
   3  14   8   71.16    4.24
  -4 -14  -8  276.84   12.10
   4  14   8  284.45    8.54
   5  14   8  709.47   16.54
  -5 -14  -8  728.77   22.67
   6  14   8   91.44    5.00
  -6 -14  -8  102.87    8.74
  -7 -14  -8    9.95    5.30
   7  14   8   18.54    3.04
   8  14   8  393.66   11.25
  -8 -14  -8  381.10   16.76
   9  14   8   -4.42    2.24
  -9 -14  -8   -2.89    5.17
 -10 -14  -8   14.19    6.31
 -11 -14  -8  109.68   11.12
 -12 -14  -8   64.98    9.74
 -13 -14  -8  321.74   18.61
  -8  15   8   -0.47    3.95
  -7  15   8   30.10    4.98
  -6  15   8   24.51    4.55
  -5  15   8   20.25    4.15
  -4  15   8  333.43   10.98
  -3  15   8  122.80    6.18
  -2  15   8  420.63   11.78
  -1  15   8  611.46   15.11
   0  15   8   61.85    4.13
   0  15   8   60.11    4.34
   1  15   8  241.30    7.93
   2  15   8  428.60   11.56
  -2 -15  -8  447.15   14.94
   3  15   8   46.76    3.87
  -3 -15  -8   40.07    5.33
   4  15   8   20.58    2.95
  -4 -15  -8   12.83    4.40
   5  15   8  224.07    7.58
  -5 -15  -8  212.97   11.48
   6  15   8   59.09    4.23
  -6 -15  -8   71.40    7.49
  -7 -15  -8  106.55    9.44
   7  15   8  103.86    5.57
  -8 -15  -8   26.99    6.46
   8  15   8   21.62    3.36
  -9 -15  -8    5.32    5.94
   9  15   8   14.13    3.16
 -10 -15  -8  208.03   13.55
 -11 -15  -8   14.40    6.77
 -12 -15  -8  137.67   12.66
 -13 -15  -8    0.90    7.09
  -8  16   8   26.43    5.27
  -7  16   8   56.24    6.22
  -6  16   8  491.52   15.41
  -5  16   8  133.47    7.41
  -4  16   8 1083.06   25.86
  -3  16   8   45.27    4.47
  -2  16   8   17.85    3.29
  -1  16   8   84.95    5.10
   0  16   8  360.90   10.54
   1  16   8   13.33    2.89
   2  16   8  231.37    8.03
   3  16   8   64.21    4.46
   4  16   8  176.26    6.80
  -4 -16  -8  176.76   10.07
   5  16   8  111.98    5.75
  -5 -16  -8  137.16    9.40
  -6 -16  -8   71.47    7.51
   6  16   8   70.19    4.93
  -7 -16  -8  208.31   12.55
   7  16   8  205.37    7.94
  -8 -16  -8   14.01    6.40
   8  16   8   11.56    2.88
  -9 -16  -8  173.26   12.17
   9  16   8  168.63    7.47
 -10 -16  -8  212.63   13.95
  10  16   8  208.19    8.67
 -11 -16  -8    4.67    6.68
 -12 -16  -8   35.19    8.80
  -7  17   8   22.69    5.02
  -6  17   8   47.20    5.66
  -5  17   8   33.25    4.90
  -4  17   8  128.07    7.21
  -3  17   8  136.74    7.08
  -2  17   8  335.04   10.74
   0  17   8  264.92    8.93
   1  17   8   25.20    3.36
   2  17   8   -0.49    2.36
   3  17   8    0.54    2.29
   4  17   8  350.74   10.48
   5  17   8    0.65    2.58
   6  17   8  894.33   20.62
  -6 -17  -8  859.69   27.06
   7  17   8  197.37    8.11
  -7 -17  -8  209.51   12.36
   8  17   8    8.73    3.21
  -8 -17  -8   10.22    5.87
  -9 -17  -8    6.35    6.19
   9  17   8    4.44    2.75
 -10 -17  -8  299.56   16.19
  10  17   8  283.70   10.42
 -11 -17  -8  103.61   10.93
 -12 -17  -8  138.42   13.28
  -6  18   8    3.34    4.08
  -5  18   8    6.13    4.04
  -4  18   8   14.17    4.16
  -3  18   8  210.27    8.87
  -1  18   8    0.44    2.77
   0  18   8  321.52   10.32
   1  18   8   98.98    5.71
   2  18   8  168.45    7.26
   3  18   8   88.66    5.19
   4  18   8  212.85    8.20
   5  18   8   49.77    4.50
   6  18   8   12.84    3.33
   7  18   8  701.48   17.84
   8  18   8   71.29    5.43
  -9 -18  -8    8.46    6.83
   9  18   8   12.89    3.62
  10  18   8  127.45    7.23
 -10 -18  -8  143.80   12.40
 -11 -18  -8   83.05   11.01
 -12 -18  -8  255.30   16.82
  -6  19   8    3.08    4.27
  -5  19   8   16.41    4.59
  -4  19   8  145.52    8.03
  -1  19   8   46.66    4.62
   0  19   8    0.13    2.65
   1  19   8   11.72    3.22
   2  19   8   -1.96    2.61
   3  19   8  256.16    9.15
   4  19   8   34.95    4.09
   5  19   8  199.37    8.27
   6  19   8    1.22    2.82
   7  19   8    9.03    3.30
   8  19   8   11.06    3.52
   9  19   8   29.61    4.33
  10  19   8   26.06    4.36
 -12 -19  -8   88.17   11.34
  -5  20   8  148.32    8.79
  -1  20   8   37.48    4.53
   0  20   8   27.77    4.03
   1  20   8   -0.74    2.84
   2  20   8   35.42    4.19
   3  20   8  246.22    9.08
   4  20   8    5.64    3.12
   5  20   8  122.38    6.84
   6  20   8  131.13    7.07
   7  20   8   -0.36    3.09
   8  20   8   -0.68    3.12
   9  20   8    1.91    3.40
  10  20   8   22.07    4.26
  -2  21   8   10.37    4.27
  -1  21   8   82.45    6.29
   0  21   8   26.62    4.23
   1  21   8    0.17    3.13
   2  21   8   56.57    5.20
   3  21   8   11.69    3.47
   4  21   8   69.13    5.62
   5  21   8   -1.01    3.22
   6  21   8   41.57    4.86
   7  21   8  191.60    8.89
   8  21   8   42.92    5.07
   0  22   8    7.28    3.66
   1  22   8  125.96    7.41
   2  22   8   93.02    6.61
   3  22   8   27.61    4.33
   4  22   8    3.09    3.44
   5  22   8    0.26    3.44
   6  22   8    5.29    3.68
   7  22   8   89.40    6.76
   0  18  -9  205.32   10.13
  -1  18  -9   60.00    6.10
   1  17  -9   56.08    5.50
   1  17  -9   64.17    6.04
   0  17  -9   59.43    5.91
   0  17  -9   81.45    6.79
  -1  17  -9   26.01    5.15
  -1  17  -9   29.30    4.90
  -2  17  -9  166.67    8.97
  -2  17  -9  173.32    9.25
   3  16  -9   -3.96    2.75
   2  16  -9  317.72   11.70
   2  16  -9  303.34   10.48
   1  16  -9   30.85    4.49
   1  16  -9   20.78    4.27
   0  16  -9    6.92    3.69
   0  16  -9    6.29    3.49
  -1  16  -9  221.08    9.77
  -1  16  -9  207.50    9.25
  -2  16  -9  288.89   11.58
  -2  16  -9  293.35   10.82
  -3  16  -9    7.20    4.16
   4  15  -9    1.74    3.00
   3  15  -9   85.16    6.17
   3  15  -9   74.74    5.62
   2  15  -9   83.35    6.04
   2  15  -9   96.62    6.46
   1  15  -9    8.60    3.32
   1  15  -9    7.59    3.46
   0  15  -9   46.12    5.05
   0  15  -9   56.94    5.22
  -1  15  -9    6.59    3.43
  -1  15  -9    5.72    3.77
  -2  15  -9   37.89    5.03
  -3  15  -9   52.29    5.59
  -4  15  -9  217.92   10.08
   6  14  -9   96.89    5.71
   5  14  -9    3.11    2.89
   4  14  -9   56.91    4.66
   4  14  -9   64.28    5.46
   3  14  -9   83.71    5.94
   3  14  -9   76.05    5.16
   2  14  -9  133.18    7.12
   2  14  -9  146.13    7.02
   1  14  -9    7.49    3.28
   1  14  -9    5.21    3.30
   0  14  -9  338.33   11.69
   0  14  -9  319.41   10.39
  -1  14  -9  298.91   10.84
  -1  14  -9  266.89    9.60
  -2  14  -9   -0.37    2.91
  -3  14  -9    2.69    3.27
  -4  14  -9   68.39    6.17
  -5  14  -9   35.11    5.29
   7  13  -9   86.05    5.30
   6  13  -9  172.16    7.17
   5  13  -9  199.26    8.37
   5  13  -9  198.18    7.53
   4  13  -9  149.01    6.67
   4  13  -9  147.48    7.29
   3  13  -9   41.31    4.52
   3  13  -9   44.69    3.89
   2  13  -9  281.82   10.28
   2  13  -9  303.34    9.57
   1  13  -9   38.16    4.07
   1  13  -9   32.69    4.24
   0  13  -9    5.75    2.95
   0  13  -9    2.24    2.98
  -1  13  -9  269.06   10.11
  -2  13  -9  437.07   13.76
  -3  13  -9   -2.15    2.83
  -4  13  -9   -3.63    3.08
  -5  13  -9  129.70    7.75
  -6  13  -9   40.64    5.34
   7  12  -9   21.95    3.25
   6  12  -9  299.38    9.45
   6  12  -9  297.34   10.40
   5  12  -9   31.59    3.43
   5  12  -9   24.64    3.73
   4  12  -9   47.82    4.55
   4  12  -9   47.83    4.05
   3  12  -9   41.25    3.77
   3  12  -9   45.41    4.36
   2  12  -9    1.97    2.39
   2  12  -9   -1.22    2.48
   1  12  -9   37.84    3.75
   1  12  -9   38.77    4.28
   0  12  -9  341.79   11.24
   0  12  -9  338.36   10.03
  -1  12  -9    8.91    3.10
  -2  12  -9    7.36    3.14
  -3  12  -9   41.85    4.64
  -4  12  -9   -0.96    3.08
  -5  12  -9  131.99    7.44
  -6  12  -9    2.30    3.48
  -7  12  -9  161.77    8.81
 -12 -11   9    1.94    6.26
 -11 -11   9    0.60    5.64
 -10 -11   9   12.72    5.65
   8  11  -9   57.38    4.67
   7  11  -9    0.75    2.52
   7  11  -9    3.32    2.47
   6  11  -9   84.97    4.81
   6  11  -9   90.04    5.75
   5  11  -9   20.12    3.10
   5  11  -9   14.96    3.36
   4  11  -9  138.60    5.87
   4  11  -9  134.88    6.62
   3  11  -9  161.83    7.13
   3  11  -9  162.88    6.36
   2  11  -9  252.40    8.03
   2  11  -9  252.65    9.11
   1  11  -9  123.04    5.67
   1  11  -9  127.01    6.50
   0  11  -9  664.93   15.61
   0  11  -9  662.57   17.47
  -1  11  -9    8.16    3.16
  -2  11  -9 1005.37   24.38
  -3  11  -9  181.35    8.03
  -4  11  -9   -0.38    2.81
  -5  11  -9   84.37    6.09
  -6  11  -9  153.04    7.94
  -7  11  -9    2.54    3.50
  -8  11  -9   42.59    5.76
 -12 -10   9   75.03    9.39
 -11 -10   9   -0.78    5.06
 -10 -10   9  168.51   10.79
  -9 -10   9  103.13    8.88
  -8 -10   9   18.81    5.13
   7  10  -9   19.83    3.47
   7  10  -9   25.29    3.01
   6  10  -9  939.05   22.33
   6  10  -9  927.53   20.32
   5  10  -9  120.33    5.39
   5  10  -9  108.10    5.96
   4  10  -9    5.34    2.31
   4  10  -9    1.92    2.38
   3  10  -9   86.62    5.30
   3  10  -9   87.76    4.45
   2  10  -9   46.58    3.65
   2  10  -9   50.86    4.54
   1  10  -9  334.28    9.23
   1  10  -9  324.37   10.50
   0  10  -9  553.63   15.03
   0  10  -9  553.46   13.38
  -1  10  -9   16.27    3.17
  -2  10  -9  799.90   20.08
  -3  10  -9    3.01    2.70
  -4  10  -9   40.85    4.39
  -5  10  -9  166.56    7.76
  -6  10  -9    4.21    3.34
  -7  10  -9    3.50    3.49
  -8  10  -9   53.66    5.72
  -9  10  -9  154.30    8.85
 -12  -9   9   77.82    8.70
 -11  -9   9    7.18    5.39
 -10  -9   9   98.08    8.78
  -9  -9   9  101.67    8.76
  -8  -9   9   40.48    5.65
   7   9  -9   48.87    4.23
   7   9  -9   49.19    4.00
  -7  -9   9   46.23    5.68
   6   9  -9   62.15    4.79
   5   9  -9  226.82    8.19
   5   9  -9  225.93    7.20
   4   9  -9  237.88    8.39
   4   9  -9  228.54    7.04
   3   9  -9   98.31    5.44
   3   9  -9   98.83    4.54
   2   9  -9   14.82    2.42
   2   9  -9   10.19    2.71
   1   9  -9   39.14    3.78
   1   9  -9   28.98    2.91
   0   9  -9   55.92    4.54
  -1   9  -9   17.01    3.00
  -2   9  -9  733.27   18.52
  -3   9  -9   10.20    2.96
  -4   9  -9  303.65   10.31
  -5   9  -9  170.16    7.63
  -6   9  -9   44.68    4.71
  -7   9  -9  148.99    7.77
  -8   9  -9   49.24    5.39
  -9   9  -9    4.85    3.86
 -13  -8   9   10.85    6.10
 -12  -8   9    6.10    5.62
 -11  -8   9    4.58    5.21
 -10  -8   9    5.63    4.76
  -9  -8   9  300.33   13.39
  -8  -8   9    2.02    4.30
  -7  -8   9  625.73   19.64
   7   8  -9  648.05   16.42
  -6  -8   9   47.21    5.03
   6   8  -9   39.81    3.32
   6   8  -9   48.12    4.26
  -5  -8   9   16.67    3.72
   5   8  -9   13.86    2.87
   5   8  -9   15.83    2.26
   4   8  -9  173.23    6.95
  -4  -8   9  178.98    7.69
   4   8  -9  177.73    5.91
   3   8  -9  239.79    8.22
   3   8  -9  239.76    6.94
   2   8  -9   18.93    2.87
   2   8  -9   16.88    2.27
   1   8  -9  375.31   10.95
   1   8  -9  371.77    9.39
   0   8  -9   22.56    3.09
  -1   8  -9    4.51    2.30
  -2   8  -9   15.66    2.94
  -3   8  -9    1.88    2.47
  -4   8  -9   19.45    3.27
  -5   8  -9  360.37   11.48
  -6   8  -9    3.56    2.83
  -7   8  -9   83.06    5.87
  -8   8  -9   -2.75    3.01
  -9   8  -9  236.86   10.15
 -10   8  -9   16.28    4.41
 -13  -7   9   -0.72    5.64
 -12  -7   9    2.11    5.37
 -11  -7   9   -3.60    4.49
 -10  -7   9   66.87    7.31
  -9  -7   9   22.16    5.30
  -8  -7   9   -3.91    3.39
  -7  -7   9  342.43   13.22
  -6  -7   9   31.76    4.54
   6   7  -9   26.44    3.24
   6   7  -9   29.90    2.77
   5   7  -9  234.59    8.03
   5   7  -9  232.06    6.77
  -5  -7   9  222.20    9.09
  -4  -7   9    2.66    2.47
   4   7  -9   -0.23    1.57
   4   7  -9   -2.25    1.82
   3   7  -9  300.62    7.77
   3   7  -9  301.56    9.32
  -3  -7   9  296.89    9.80
   2   7  -9  297.12    7.48
   2   7  -9  289.32    9.02
  -2  -7   9  274.14    8.91
   1   7  -9  144.18    6.05
   1   7  -9  140.20    4.90
   0   7  -9  243.40    8.21
  -1   7  -9   18.01    2.69
  -2   7  -9  148.07    6.38
  -3   7  -9  543.54   14.47
  -4   7  -9  108.29    5.71
  -5   7  -9  621.65   16.37
  -6   7  -9    1.33    2.70
  -7   7  -9   -1.50    2.76
  -8   7  -9  147.44    7.43
  -9   7  -9   95.95    6.58
 -10   7  -9  121.99    7.45
 -11   7  -9  164.46    8.97
 -13  -6   9    2.58    6.00
 -12  -6   9  392.48   17.46
 -11  -6   9   61.37    7.77
 -10  -6   9   77.80    7.83
  -9  -6   9  133.67    8.97
  -8  -6   9  122.66    8.15
  -7  -6   9  199.58    9.61
  -6  -6   9   50.59    4.89
   6   6  -9   47.38    4.01
   5   6  -9  228.36    6.58
  -5  -6   9  234.85    9.22
   5   6  -9  237.20    7.90
   4   6  -9    1.64    1.51
  -4  -6   9    0.04    2.09
   4   6  -9   -0.76    1.71
   3   6  -9  109.85    3.97
   3   6  -9  103.85    5.02
  -3  -6   9   92.41    5.29
   2   6  -9  510.39   13.23
   2   6  -9  515.75   11.20
  -2  -6   9  515.81   13.95
   1   6  -9   69.45    3.43
  -1  -6   9   72.57    3.97
   1   6  -9   67.53    4.23
   0   6  -9  722.35   17.37
  -1   6  -9  524.87   13.58
  -2   6  -9  411.48   11.46
  -3   6  -9   35.30    3.35
  -4   6  -9  192.68    7.34
  -5   6  -9   91.88    5.46
  -6   6  -9  326.11   10.61
  -7   6  -9   39.38    4.25
  -8   6  -9   75.15    5.63
  -9   6  -9    4.01    3.16
 -10   6  -9   35.27    4.81
 -11   6  -9   31.68    4.92
 -13  -5   9   26.47    7.03
 -12  -5   9   85.36    8.80
 -11  -5   9   92.72    9.00
 -10  -5   9  550.30   19.59
  -9  -5   9  132.00    8.75
  -8  -5   9  166.99    9.21
  -7  -5   9   65.72    6.18
   6   5  -9   42.39    3.80
  -6  -5   9   38.24    4.41
   5   5  -9  280.21    8.56
[truncated: 337,215 more chars]
