# Supplementary material
Source: MDPI journal article supplement (https://www.mdpi.com/2304-6740/6/4/107)
Supplement: s1 [file s1 › Cif and checkCif files/si303a.cif]

 
data_si303a
 
_audit_creation_method            SHELXL-2014
_chemical_name_systematic
;
 ?
;
_chemical_name_common             ?
_chemical_melting_point           ?
_chemical_formula_moiety          ?
_chemical_formula_sum
 'C48 H116 Si16' 
_chemical_formula_weight          1142.84

loop_
 _atom_type_symbol
 _atom_type_description
 _atom_type_scat_dispersion_real
 _atom_type_scat_dispersion_imag
 _atom_type_scat_source
 'C'  'C'   0.0033   0.0016
 'International Tables Vol C Tables 4.2.6.8 and 6.1.1.4'
 'H'  'H'   0.0000   0.0000
 'International Tables Vol C Tables 4.2.6.8 and 6.1.1.4'
 'Si'  'Si'   0.0817   0.0704
 'International Tables Vol C Tables 4.2.6.8 and 6.1.1.4'
 
_space_group_crystal_system       monoclinic
_space_group_IT_number            15
_space_group_name_H-M_alt         'C 2/c'
_space_group_name_Hall            '-C 2yc'
 
_shelx_space_group_comment
;
The symmetry employed for this shelxl refinement is uniquely defined
by the following loop, which should always be used as a source of
symmetry information in preference to the above space-group names.
They are only intended as comments.
;
 
loop_
 _space_group_symop_operation_xyz
 'x, y, z'
 '-x, y, -z+1/2'
 'x+1/2, y+1/2, z'
 '-x+1/2, y+1/2, -z+1/2'
 '-x, -y, -z'
 'x, -y, z-1/2'
 '-x+1/2, -y+1/2, -z'
 'x+1/2, -y+1/2, z-1/2'
 
_cell_length_a                    21.538(2)
_cell_length_b                    17.9167(19)
_cell_length_c                    20.793(3)
_cell_angle_alpha                 90
_cell_angle_beta                  118.8750(10)
_cell_angle_gamma                 90
_cell_volume                      7026.1(15)
_cell_formula_units_Z             4
_cell_measurement_temperature     100(2)
_cell_measurement_reflns_used    6368
_cell_measurement_theta_min        2.21
_cell_measurement_theta_max       27.63
 
_exptl_crystal_description        plate
_exptl_crystal_colour             yellow
_exptl_crystal_density_meas       ? 
_exptl_crystal_density_method     ?              
_exptl_crystal_density_diffrn     1.080          
_exptl_crystal_F_000              2512
_exptl_transmission_factor_min    ?                                             
_exptl_transmission_factor_max    ?                                             
_exptl_crystal_size_max           0.100
_exptl_crystal_size_mid           0.050
_exptl_crystal_size_min           0.030
_exptl_absorpt_coefficient_mu     0.318
_shelx_estimated_absorpt_T_min    0.969
_shelx_estimated_absorpt_T_max    0.991
_exptl_absorpt_correction_type    empirical
_exptl_absorpt_correction_T_min   0.5840
_exptl_absorpt_correction_T_max   0.7456
_exptl_absorpt_process_details    
;
SADABS Sheldrick 1996
; 
_exptl_special_details
;
 ?
;
 
_diffrn_ambient_temperature       100(2)
_diffrn_radiation_wavelength      0.71073
_diffrn_radiation_type            MoK\a
_diffrn_radiation_source          'Bruker TXS fine-focus rotating anode' 
_diffrn_radiation_monochromator   'Bruker Helios multilayer confocal mirror' 
_diffrn_measurement_device_type   'Bruker APEXII CCD area detector' 
_diffrn_measurement_method        'phi and omega scans' 
_diffrn_detector_area_resol_mean  8.333
_diffrn_reflns_number             18219
_diffrn_reflns_av_unetI/netI      0.0439
_diffrn_reflns_av_R_equivalents   0.0308
_diffrn_reflns_limit_h_min        -15
_diffrn_reflns_limit_h_max        27
_diffrn_reflns_limit_k_min        -22
_diffrn_reflns_limit_k_max        22
_diffrn_reflns_limit_l_min        -26
_diffrn_reflns_limit_l_max        21
_diffrn_reflns_theta_min          1.568
_diffrn_reflns_theta_max          26.498
_diffrn_reflns_theta_full         25.242
_diffrn_measured_fraction_theta_max   0.993
_diffrn_measured_fraction_theta_full  0.996
_diffrn_reflns_Laue_measured_fraction_max    0.993
_diffrn_reflns_Laue_measured_fraction_full   0.996
_diffrn_reflns_point_group_measured_fraction_max   0.993
_diffrn_reflns_point_group_measured_fraction_full  0.996
_reflns_number_total              7243
_reflns_number_gt                 5514
_reflns_threshold_expression      'I > 2\s(I)'
_reflns_Friedel_coverage          0.000
_reflns_Friedel_fraction_max      .
_reflns_Friedel_fraction_full     .
 
_reflns_special_details
;
 Reflections were merged by SHELXL according to the crystal
 class for the calculation of statistics and refinement.
 
 _reflns_Friedel_fraction is defined as the number of unique
 Friedel pairs measured divided by the number that would be
 possible theoretically, ignoring centric projections and
 systematic absences.
;
 
_computing_data_collection        'APEX2 (Bruker AXS, 2006)'
_computing_cell_refinement        'APEX2 (Bruker AXS, 2006)'
_computing_data_reduction         'SAINT (Bruker AXS, 2004)'
_computing_structure_solution     'SHELXS-97 (Sheldrick, 1997)'
_computing_structure_refinement   'SHELXL-2014 (Sheldrick, 2014)'
_computing_molecular_graphics     'XSHEL (Bruker AXS,2002)'
_computing_publication_material   'XCIF (Bruker AXS, 2001)' 
 
_refine_special_details
;
 ?
;
_refine_ls_structure_factor_coef  Fsqd
_refine_ls_matrix_type            full
_refine_ls_weighting_scheme       calc
_refine_ls_weighting_details
'w=1/[\s^2^(Fo^2^)+(0.0365P)^2^+6.3329P] where P=(Fo^2^+2Fc^2^)/3'
_atom_sites_solution_primary      ?
_atom_sites_solution_secondary    ?
_atom_sites_solution_hydrogens    geom
_refine_ls_hydrogen_treatment     constr
_refine_ls_extinction_method      none
_refine_ls_extinction_coef        .
_refine_ls_number_reflns          7243
_refine_ls_number_parameters      309
_refine_ls_number_restraints      0
_refine_ls_R_factor_all           0.0617
_refine_ls_R_factor_gt            0.0363
_refine_ls_wR_factor_ref          0.0910
_refine_ls_wR_factor_gt           0.0769
_refine_ls_goodness_of_fit_ref    1.077
_refine_ls_restrained_S_all       1.077
_refine_ls_shift/su_max           0.001
_refine_ls_shift/su_mean          0.000
 
loop_
 _atom_site_label
 _atom_site_type_symbol
 _atom_site_fract_x
 _atom_site_fract_y
 _atom_site_fract_z
 _atom_site_U_iso_or_equiv
 _atom_site_adp_type
 _atom_site_occupancy
 _atom_site_site_symmetry_order  
 _atom_site_calc_flag
 _atom_site_refinement_flags_posn
 _atom_site_refinement_flags_adp
 _atom_site_refinement_flags_occupancy
 _atom_site_disorder_assembly
 _atom_site_disorder_group
Si1 Si 0.0000 -0.22749(5) 0.7500 0.02128(19) Uani 1 2 d S T P . .
C1 C 0.07362(11) -0.29539(11) 0.76426(11) 0.0178(4) Uani 1 1 d . . . . .
C2 C 0.03076(11) -0.37073(11) 0.74089(12) 0.0218(5) Uani 1 1 d . . . . .
H1 H 0.0114 -0.3783 0.6874 0.026 Uiso 1 1 calc R U . . .
H2 H 0.0631 -0.4128 0.7667 0.026 Uiso 1 1 calc R U . . .
Si2 Si 0.0000 -0.10710(5) 0.7500 0.0411(3) Uani 1 2 d S T P . .
Si3 Si -0.06913(3) -0.00340(3) 0.74599(3) 0.01758(13) Uani 1 1 d . . . . .
Si4 Si 0.03317(3) 0.06163(3) 0.82908(3) 0.01789(13) Uani 1 1 d . . . . .
Si5 Si 0.0000 0.16619(5) 0.7500 0.0364(3) Uani 1 2 d S T P . .
Si6 Si 0.0000 0.28698(4) 0.7500 0.02237(19) Uani 1 2 d S T P . .
C3 C 0.02167(11) 0.35519(11) 0.82842(11) 0.0177(4) Uani 1 1 d . . . . .
C4 C 0.02485(12) 0.43081(11) 0.79154(11) 0.0229(5) Uani 1 1 d . . . . .
H3 H 0.0117 0.4724 0.8140 0.027 Uiso 1 1 calc R U . . .
H4 H 0.0741 0.4394 0.8014 0.027 Uiso 1 1 calc R U . . .
Si7 Si 0.14470(3) -0.30372(3) 0.86429(3) 0.02315(14) Uani 1 1 d . . . . .
C5 C 0.11088(14) -0.33971(15) 0.92624(13) 0.0370(6) Uani 1 1 d . . . . .
H5 H 0.1498 -0.3411 0.9769 0.055 Uiso 1 1 calc R U . . .
H6 H 0.0918 -0.3901 0.9108 0.055 Uiso 1 1 calc R U . . .
H7 H 0.0734 -0.3067 0.9234 0.055 Uiso 1 1 calc R U . . .
C6 C 0.18787(13) -0.21193(13) 0.90229(13) 0.0335(6) Uani 1 1 d . . . . .
H8 H 0.1555 -0.1715 0.8741 0.050 Uiso 1 1 calc R U . . .
H9 H 0.2315 -0.2079 0.8988 0.050 Uiso 1 1 calc R U . . .
H10 H 0.1992 -0.2082 0.9539 0.050 Uiso 1 1 calc R U . . .
C7 C 0.21273(12) -0.37561(13) 0.87441(14) 0.0333(6) Uani 1 1 d . . . . .
H11 H 0.2377 -0.3588 0.8482 0.050 Uiso 1 1 calc R U . . .
H12 H 0.1890 -0.4232 0.8537 0.050 Uiso 1 1 calc R U . . .
H13 H 0.2468 -0.3823 0.9266 0.050 Uiso 1 1 calc R U . . .
Si8 Si 0.11451(3) -0.27818(3) 0.70173(3) 0.01971(13) Uani 1 1 d . . . . .
C8 C 0.12485(13) -0.37012(12) 0.66488(13) 0.0287(5) Uani 1 1 d . . . . .
H14 H 0.0780 -0.3897 0.6300 0.043 Uiso 1 1 calc R U . . .
H15 H 0.1489 -0.4055 0.7055 0.043 Uiso 1 1 calc R U . . .
H16 H 0.1530 -0.3633 0.6398 0.043 Uiso 1 1 calc R U . . .
C9 C 0.05974(12) -0.21648(13) 0.62188(12) 0.0291(5) Uani 1 1 d . . . . .
H17 H 0.0513 -0.1689 0.6396 0.044 Uiso 1 1 calc R U . . .
H18 H 0.0143 -0.2408 0.5901 0.044 Uiso 1 1 calc R U . . .
H19 H 0.0849 -0.2073 0.5940 0.044 Uiso 1 1 calc R U . . .
C10 C 0.20434(12) -0.23379(13) 0.74819(14) 0.0305(5) Uani 1 1 d . . . . .
H20 H 0.2201 -0.2241 0.7119 0.046 Uiso 1 1 calc R U . . .
H21 H 0.2380 -0.2674 0.7862 0.046 Uiso 1 1 calc R U . . .
H22 H 0.2019 -0.1866 0.7707 0.046 Uiso 1 1 calc R U . . .
C11 C -0.15973(11) 0.01102(12) 0.74061(12) 0.0232(5) Uani 1 1 d . . . . .
C12 C -0.21912(12) -0.01991(13) 0.66858(13) 0.0293(5) Uani 1 1 d . . . . .
H23 H -0.2651 -0.0093 0.6656 0.044 Uiso 1 1 calc R U . . .
H24 H -0.2133 -0.0740 0.6668 0.044 Uiso 1 1 calc R U . . .
H25 H -0.2170 0.0037 0.6271 0.044 Uiso 1 1 calc R U . . .
C13 C -0.17042(13) 0.09544(13) 0.74314(17) 0.0430(7) Uani 1 1 d . . . . .
H26 H -0.1707 0.1192 0.7006 0.064 Uiso 1 1 calc R U . . .
H27 H -0.1317 0.1161 0.7884 0.064 Uiso 1 1 calc R U . . .
H28 H -0.2157 0.1049 0.7421 0.064 Uiso 1 1 calc R U . . .
C14 C -0.16192(13) -0.02502(14) 0.80613(13) 0.0334(6) Uani 1 1 d . . . . .
H29 H -0.2084 -0.0161 0.8025 0.050 Uiso 1 1 calc R U . . .
H30 H -0.1248 -0.0032 0.8518 0.050 Uiso 1 1 calc R U . . .
H31 H -0.1540 -0.0789 0.8060 0.050 Uiso 1 1 calc R U . . .
C15 C 0.07867(12) 0.04928(12) 0.93341(12) 0.0233(5) Uani 1 1 d . . . . .
C16 C 0.08933(14) -0.03460(13) 0.95083(13) 0.0351(6) Uani 1 1 d . . . . .
H32 H 0.1112 -0.0420 1.0041 0.053 Uiso 1 1 calc R U . . .
H33 H 0.1203 -0.0554 0.9329 0.053 Uiso 1 1 calc R U . . .
H34 H 0.0433 -0.0600 0.9266 0.053 Uiso 1 1 calc R U . . .
C17 C 0.15125(12) 0.08741(15) 0.96943(13) 0.0349(6) Uani 1 1 d . . . . .
H35 H 0.1455 0.1403 0.9558 0.052 Uiso 1 1 calc R U . . .
H36 H 0.1818 0.0635 0.9526 0.052 Uiso 1 1 calc R U . . .
H37 H 0.1730 0.0828 1.0229 0.052 Uiso 1 1 calc R U . . .
C18 C 0.03175(12) 0.08086(12) 0.96358(12) 0.0265(5) Uani 1 1 d . . . . .
H38 H 0.0559 0.0753 1.0171 0.040 Uiso 1 1 calc R U . . .
H39 H -0.0133 0.0536 0.9421 0.040 Uiso 1 1 calc R U . . .
H40 H 0.0226 0.1339 0.9508 0.040 Uiso 1 1 calc R U . . .
Si9 Si -0.05242(3) 0.36171(3) 0.85385(3) 0.02358(14) Uani 1 1 d . . . . .
C19 C -0.07605(14) 0.27030(14) 0.87886(15) 0.0379(6) Uani 1 1 d . . . . .
H41 H -0.1209 0.2751 0.8799 0.057 Uiso 1 1 calc R U . . .
H42 H -0.0385 0.2550 0.9274 0.057 Uiso 1 1 calc R U . . .
H43 H -0.0812 0.2327 0.8424 0.057 Uiso 1 1 calc R U . . .
C20 C -0.13587(13) 0.40205(16) 0.77865(14) 0.0422(7) Uani 1 1 d . . . . .
H44 H -0.1531 0.3704 0.7349 0.063 Uiso 1 1 calc R U . . .
H45 H -0.1265 0.4524 0.7670 0.063 Uiso 1 1 calc R U . . .
H46 H -0.1719 0.4045 0.7946 0.063 Uiso 1 1 calc R U . . .
C21 C -0.02907(13) 0.42854(13) 0.93165(13) 0.0328(6) Uani 1 1 d . . . . .
H47 H -0.0173 0.4773 0.9190 0.049 Uiso 1 1 calc R U . . .
H48 H 0.0118 0.4094 0.9760 0.049 Uiso 1 1 calc R U . . .
H49 H -0.0696 0.4339 0.9406 0.049 Uiso 1 1 calc R U . . .
Si10 Si 0.11121(3) 0.34153(3) 0.91377(3) 0.02078(14) Uani 1 1 d . . . . .
C22 C 0.17954(12) 0.29578(14) 0.89605(13) 0.0332(6) Uani 1 1 d . . . . .
H50 H 0.2210 0.2828 0.9429 0.050 Uiso 1 1 calc R U . . .
H51 H 0.1939 0.3302 0.8690 0.050 Uiso 1 1 calc R U . . .
H52 H 0.1596 0.2504 0.8670 0.050 Uiso 1 1 calc R U . . .
C23 C 0.10572(13) 0.28382(13) 0.98531(13) 0.0309(5) Uani 1 1 d . . . . .
H53 H 0.0835 0.2358 0.9641 0.046 Uiso 1 1 calc R U . . .
H54 H 0.0773 0.3100 1.0034 0.046 Uiso 1 1 calc R U . . .
H55 H 0.1535 0.2753 1.0261 0.046 Uiso 1 1 calc R U . . .
C24 C 0.14792(13) 0.43463(13) 0.95688(14) 0.0348(6) Uani 1 1 d . . . . .
H56 H 0.1117 0.4625 0.9625 0.052 Uiso 1 1 calc R U . . .
H57 H 0.1618 0.4628 0.9254 0.052 Uiso 1 1 calc R U . . .
H58 H 0.1895 0.4271 1.0052 0.052 Uiso 1 1 calc R U . . .
 
loop_
 _atom_site_aniso_label
 _atom_site_aniso_U_11
 _atom_site_aniso_U_22
 _atom_site_aniso_U_33
 _atom_site_aniso_U_23
 _atom_site_aniso_U_13
 _atom_site_aniso_U_12
Si1 0.0185(4) 0.0130(4) 0.0351(5) 0.000 0.0151(4) 0.000
C1 0.0181(10) 0.0131(10) 0.0227(11) 0.0010(8) 0.0104(9) 0.0024(8)
C2 0.0241(12) 0.0135(10) 0.0308(12) 0.0004(9) 0.0156(10) 0.0013(9)
Si2 0.0310(5) 0.0118(4) 0.0974(9) 0.000 0.0445(6) 0.000
Si3 0.0177(3) 0.0143(3) 0.0240(3) 0.0003(2) 0.0126(2) 0.0013(2)
Si4 0.0212(3) 0.0145(3) 0.0201(3) 0.0010(2) 0.0117(3) 0.0000(2)
Si5 0.0722(8) 0.0115(4) 0.0182(5) 0.000 0.0162(5) 0.000
Si6 0.0363(5) 0.0124(4) 0.0172(4) 0.000 0.0119(4) 0.000
C3 0.0224(11) 0.0121(10) 0.0176(10) -0.0004(8) 0.0089(9) 0.0007(8)
C4 0.0292(12) 0.0142(11) 0.0209(11) -0.0011(9) 0.0086(10) -0.0006(9)
Si7 0.0229(3) 0.0214(3) 0.0219(3) 0.0022(2) 0.0083(3) 0.0041(2)
C5 0.0378(14) 0.0464(16) 0.0240(13) 0.0097(11) 0.0128(12) 0.0084(12)
C6 0.0323(14) 0.0301(13) 0.0259(13) -0.0027(10) 0.0045(11) 0.0020(11)
C7 0.0284(13) 0.0279(13) 0.0366(14) 0.0070(11) 0.0103(12) 0.0095(10)
Si8 0.0205(3) 0.0172(3) 0.0244(3) -0.0006(2) 0.0133(3) 0.0013(2)
C8 0.0355(13) 0.0230(12) 0.0370(14) -0.0035(10) 0.0250(12) 0.0028(10)
C9 0.0352(13) 0.0314(13) 0.0278(12) 0.0026(10) 0.0208(11) 0.0032(11)
C10 0.0256(12) 0.0293(13) 0.0408(14) -0.0007(11) 0.0193(11) -0.0037(10)
C11 0.0185(11) 0.0207(11) 0.0331(13) -0.0009(9) 0.0146(10) 0.0020(9)
C12 0.0231(12) 0.0331(13) 0.0333(13) 0.0050(11) 0.0150(11) 0.0012(10)
C13 0.0303(14) 0.0250(13) 0.081(2) -0.0057(13) 0.0324(15) 0.0057(11)
C14 0.0271(13) 0.0469(16) 0.0338(14) -0.0052(12) 0.0209(12) -0.0054(11)
C15 0.0260(12) 0.0220(12) 0.0216(11) 0.0012(9) 0.0113(10) 0.0019(9)
C16 0.0487(16) 0.0287(13) 0.0281(13) 0.0074(10) 0.0186(12) 0.0104(12)
C17 0.0270(13) 0.0473(16) 0.0270(13) -0.0040(11) 0.0102(11) -0.0007(11)
C18 0.0349(13) 0.0233(12) 0.0254(12) -0.0002(9) 0.0178(11) -0.0025(10)
Si9 0.0231(3) 0.0227(3) 0.0265(3) -0.0080(3) 0.0133(3) -0.0013(3)
C19 0.0423(15) 0.0335(14) 0.0534(17) -0.0108(12) 0.0353(14) -0.0109(12)
C20 0.0280(14) 0.0567(18) 0.0402(15) -0.0136(13) 0.0152(12) 0.0067(13)
C21 0.0380(14) 0.0312(13) 0.0340(14) -0.0091(11) 0.0212(12) 0.0010(11)
Si10 0.0208(3) 0.0193(3) 0.0187(3) 0.0013(2) 0.0068(3) -0.0010(2)
C22 0.0241(12) 0.0451(15) 0.0289(13) 0.0098(11) 0.0115(11) 0.0074(11)
C23 0.0354(14) 0.0312(13) 0.0249(12) 0.0052(10) 0.0137(11) 0.0046(11)
C24 0.0286(13) 0.0274(13) 0.0330(14) -0.0030(11) 0.0027(11) -0.0058(11)
 
_geom_special_details
;
 All esds (except the esd in the dihedral angle between two l.s. planes)
 are estimated using the full covariance matrix.  The cell esds are taken
 into account individually in the estimation of esds in distances, angles
 and torsion angles; correlations between esds in cell parameters are only
 used when they are defined by crystal symmetry.  An approximate (isotropic)
 treatment of cell esds is used for estimating esds involving l.s. planes.
;
 
loop_
 _geom_bond_atom_site_label_1
 _geom_bond_atom_site_label_2
 _geom_bond_distance
 _geom_bond_site_symmetry_2
 _geom_bond_publ_flag
Si1 C1 1.905(2) . ?
Si1 C1 1.905(2) 2_556 ?
Si1 Si2 2.1570(12) . ?
C1 C2 1.574(3) . ?
C1 Si7 1.902(2) . ?
C1 Si8 1.915(2) . ?
C2 C2 1.544(4) 2_556 ?
Si2 Si3 2.3570(9) . ?
Si2 Si3 2.3571(9) 2_556 ?
Si3 C11 1.917(2) . ?
Si3 Si4 2.3496(8) . ?
Si3 Si4 2.3585(8) 2_556 ?
Si4 C15 1.914(2) . ?
Si4 Si3 2.3585(8) 2_556 ?
Si4 Si5 2.3641(9) . ?
Si5 Si6 2.1641(12) . ?
Si5 Si4 2.3642(9) 2_556 ?
Si6 C3 1.907(2) 2_556 ?
Si6 C3 1.907(2) . ?
C3 C4 1.574(3) . ?
C3 Si10 1.904(2) . ?
C3 Si9 1.912(2) . ?
C4 C4 1.531(4) 2_556 ?
Si7 C6 1.867(2) . ?
Si7 C5 1.874(2) . ?
Si7 C7 1.885(2) . ?
Si8 C9 1.865(2) . ?
Si8 C10 1.872(2) . ?
Si8 C8 1.875(2) . ?
C11 C12 1.528(3) . ?
C11 C14 1.529(3) . ?
C11 C13 1.535(3) . ?
C15 C17 1.530(3) . ?
C15 C18 1.532(3) . ?
C15 C16 1.537(3) . ?
Si9 C19 1.862(2) . ?
Si9 C20 1.866(3) . ?
Si9 C21 1.876(2) . ?
Si10 C23 1.862(2) . ?
Si10 C22 1.870(2) . ?
Si10 C24 1.878(2) . ?
 
loop_
 _geom_angle_atom_site_label_1
 _geom_angle_atom_site_label_2
 _geom_angle_atom_site_label_3
 _geom_angle
 _geom_angle_site_symmetry_1
 _geom_angle_site_symmetry_3
 _geom_angle_publ_flag
C1 Si1 C1 100.60(12) . 2_556 ?
C1 Si1 Si2 129.70(6) . . ?
C1 Si1 Si2 129.70(6) 2_556 . ?
C2 C1 Si7 108.23(14) . . ?
C2 C1 Si1 100.35(13) . . ?
Si7 C1 Si1 112.98(10) . . ?
C2 C1 Si8 108.78(13) . . ?
Si7 C1 Si8 111.34(10) . . ?
Si1 C1 Si8 114.37(10) . . ?
C2 C2 C1 111.66(13) 2_556 . ?
Si1 Si2 Si3 142.020(19) . . ?
Si1 Si2 Si3 142.019(19) . 2_556 ?
Si3 Si2 Si3 75.96(4) . 2_556 ?
C11 Si3 Si4 122.86(7) . . ?
C11 Si3 Si2 135.72(7) . . ?
Si4 Si3 Si2 90.74(3) . . ?
C11 Si3 Si4 123.03(7) . 2_556 ?
Si4 Si3 Si4 75.56(3) . 2_556 ?
Si2 Si3 Si4 90.52(3) . 2_556 ?
C15 Si4 Si3 124.14(7) . . ?
C15 Si4 Si3 122.75(7) . 2_556 ?
Si3 Si4 Si3 76.07(3) . 2_556 ?
C15 Si4 Si5 134.22(7) . . ?
Si3 Si4 Si5 91.17(3) . . ?
Si3 Si4 Si5 90.95(3) 2_556 . ?
Si6 Si5 Si4 142.41(2) . . ?
Si6 Si5 Si4 142.41(2) . 2_556 ?
Si4 Si5 Si4 75.18(4) . 2_556 ?
C3 Si6 C3 100.26(12) 2_556 . ?
C3 Si6 Si5 129.87(6) 2_556 . ?
C3 Si6 Si5 129.87(6) . . ?
C4 C3 Si10 107.58(14) . . ?
C4 C3 Si6 100.68(13) . . ?
Si10 C3 Si6 115.74(10) . . ?
C4 C3 Si9 108.70(14) . . ?
Si10 C3 Si9 110.80(10) . . ?
Si6 C3 Si9 112.55(10) . . ?
C4 C4 C3 112.24(13) 2_556 . ?
C6 Si7 C5 106.96(12) . . ?
C6 Si7 C7 110.70(11) . . ?
C5 Si7 C7 103.14(11) . . ?
C6 Si7 C1 111.54(10) . . ?
C5 Si7 C1 113.82(10) . . ?
C7 Si7 C1 110.34(10) . . ?
C9 Si8 C10 105.03(11) . . ?
C9 Si8 C8 107.80(11) . . ?
C10 Si8 C8 106.68(11) . . ?
C9 Si8 C1 113.54(9) . . ?
C10 Si8 C1 114.69(10) . . ?
C8 Si8 C1 108.69(9) . . ?
C12 C11 C14 110.41(18) . . ?
C12 C11 C13 108.81(19) . . ?
C14 C11 C13 108.4(2) . . ?
C12 C11 Si3 110.79(15) . . ?
C14 C11 Si3 111.08(15) . . ?
C13 C11 Si3 107.23(15) . . ?
C17 C15 C18 110.78(19) . . ?
C17 C15 C16 108.68(19) . . ?
C18 C15 C16 108.52(18) . . ?
C17 C15 Si4 110.25(15) . . ?
C18 C15 Si4 110.08(15) . . ?
C16 C15 Si4 108.46(15) . . ?
C19 Si9 C20 106.98(13) . . ?
C19 Si9 C21 108.44(11) . . ?
C20 Si9 C21 102.94(11) . . ?
C19 Si9 C3 113.63(10) . . ?
C20 Si9 C3 112.75(11) . . ?
C21 Si9 C3 111.45(10) . . ?
C23 Si10 C22 105.88(11) . . ?
C23 Si10 C24 106.65(11) . . ?
C22 Si10 C24 107.05(12) . . ?
C23 Si10 C3 112.94(10) . . ?
C22 Si10 C3 114.34(10) . . ?
C24 Si10 C3 109.53(10) . . ?
 
loop_
 _geom_torsion_atom_site_label_1
 _geom_torsion_atom_site_label_2
 _geom_torsion_atom_site_label_3
 _geom_torsion_atom_site_label_4
 _geom_torsion
 _geom_torsion_site_symmetry_1
 _geom_torsion_site_symmetry_2
 _geom_torsion_site_symmetry_3
 _geom_torsion_site_symmetry_4
 _geom_torsion_publ_flag
C1 Si1 C1 C2 11.05(9) 2_556 . . . ?
Si2 Si1 C1 C2 -168.95(9) . . . . ?
C1 Si1 C1 Si7 -103.96(11) 2_556 . . . ?
Si2 Si1 C1 Si7 76.04(11) . . . . ?
C1 Si1 C1 Si8 127.29(13) 2_556 . . . ?
Si2 Si1 C1 Si8 -52.71(13) . . . . ?
Si7 C1 C2 C2 86.7(2) . . . 2_556 ?
Si1 C1 C2 C2 -31.9(2) . . . 2_556 ?
Si8 C1 C2 C2 -152.19(19) . . . 2_556 ?
C1 Si1 Si2 Si3 -172.67(8) . . . . ?
C1 Si1 Si2 Si3 7.33(8) 2_556 . . . ?
C1 Si1 Si2 Si3 7.33(8) . . . 2_556 ?
C1 Si1 Si2 Si3 -172.67(8) 2_556 . . 2_556 ?
Si1 Si2 Si3 C11 -0.11(11) . . . . ?
Si3 Si2 Si3 C11 179.89(11) 2_556 . . . ?
Si1 Si2 Si3 Si4 142.134(19) . . . . ?
Si3 Si2 Si3 Si4 -37.867(19) 2_556 . . . ?
Si1 Si2 Si3 Si4 -142.302(18) . . . 2_556 ?
Si3 Si2 Si3 Si4 37.697(18) 2_556 . . 2_556 ?
C11 Si3 Si4 C15 66.87(12) . . . . ?
Si2 Si3 Si4 C15 -82.54(9) . . . . ?
Si4 Si3 Si4 C15 -172.88(8) 2_556 . . . ?
C11 Si3 Si4 Si3 -172.78(9) . . . 2_556 ?
Si2 Si3 Si4 Si3 37.82(2) . . . 2_556 ?
Si4 Si3 Si4 Si3 -52.53(3) 2_556 . . 2_556 ?
C11 Si3 Si4 Si5 -82.08(9) . . . . ?
Si2 Si3 Si4 Si5 128.51(2) . . . . ?
Si4 Si3 Si4 Si5 38.16(2) 2_556 . . . ?
C15 Si4 Si5 Si6 -1.57(11) . . . . ?
Si3 Si4 Si5 Si6 141.870(18) . . . . ?
Si3 Si4 Si5 Si6 -142.040(19) 2_556 . . . ?
C15 Si4 Si5 Si4 178.42(11) . . . 2_556 ?
Si3 Si4 Si5 Si4 -38.132(18) . . . 2_556 ?
Si3 Si4 Si5 Si4 37.958(19) 2_556 . . 2_556 ?
Si4 Si5 Si6 C3 170.51(8) . . . 2_556 ?
Si4 Si5 Si6 C3 -9.49(8) 2_556 . . 2_556 ?
Si4 Si5 Si6 C3 -9.49(8) . . . . ?
Si4 Si5 Si6 C3 170.51(8) 2_556 . . . ?
C3 Si6 C3 C4 -10.46(9) 2_556 . . . ?
Si5 Si6 C3 C4 169.54(9) . . . . ?
C3 Si6 C3 Si10 -126.06(13) 2_556 . . . ?
Si5 Si6 C3 Si10 53.94(13) . . . . ?
C3 Si6 C3 Si9 105.11(12) 2_556 . . . ?
Si5 Si6 C3 Si9 -74.89(12) . . . . ?
Si10 C3 C4 C4 152.0(2) . . . 2_556 ?
Si6 C3 C4 C4 30.5(2) . . . 2_556 ?
Si9 C3 C4 C4 -88.0(2) . . . 2_556 ?
C2 C1 Si7 C6 -169.80(14) . . . . ?
Si1 C1 Si7 C6 -59.61(14) . . . . ?
Si8 C1 Si7 C6 70.69(13) . . . . ?
C2 C1 Si7 C5 -48.67(17) . . . . ?
Si1 C1 Si7 C5 61.52(14) . . . . ?
Si8 C1 Si7 C5 -168.17(11) . . . . ?
C2 C1 Si7 C7 66.72(16) . . . . ?
Si1 C1 Si7 C7 176.91(11) . . . . ?
Si8 C1 Si7 C7 -52.79(13) . . . . ?
C2 C1 Si8 C9 95.31(15) . . . . ?
Si7 C1 Si8 C9 -145.51(11) . . . . ?
Si1 C1 Si8 C9 -15.94(15) . . . . ?
C2 C1 Si8 C10 -143.92(14) . . . . ?
Si7 C1 Si8 C10 -24.74(14) . . . . ?
Si1 C1 Si8 C10 104.83(13) . . . . ?
C2 C1 Si8 C8 -24.65(17) . . . . ?
Si7 C1 Si8 C8 94.53(12) . . . . ?
Si1 C1 Si8 C8 -135.89(12) . . . . ?
Si4 Si3 C11 C12 163.16(12) . . . . ?
Si2 Si3 C11 C12 -63.64(19) . . . . ?
Si4 Si3 C11 C12 69.38(17) 2_556 . . . ?
Si4 Si3 C11 C14 -73.74(17) . . . . ?
Si2 Si3 C11 C14 59.46(19) . . . . ?
Si4 Si3 C11 C14 -167.52(13) 2_556 . . . ?
Si4 Si3 C11 C13 44.55(19) . . . . ?
Si2 Si3 C11 C13 177.75(13) . . . . ?
Si4 Si3 C11 C13 -49.22(19) 2_556 . . . ?
Si3 Si4 C15 C17 168.46(13) . . . . ?
Si3 Si4 C15 C17 73.27(17) 2_556 . . . ?
Si5 Si4 C15 C17 -57.55(19) . . . . ?
Si3 Si4 C15 C18 -69.02(16) . . . . ?
Si3 Si4 C15 C18 -164.22(12) 2_556 . . . ?
Si5 Si4 C15 C18 64.97(18) . . . . ?
Si3 Si4 C15 C16 49.57(18) . . . . ?
Si3 Si4 C15 C16 -45.62(18) 2_556 . . . ?
Si5 Si4 C15 C16 -176.44(12) . . . . ?
C4 C3 Si9 C19 167.24(14) . . . . ?
Si10 C3 Si9 C19 -74.75(14) . . . . ?
Si6 C3 Si9 C19 56.60(15) . . . . ?
C4 C3 Si9 C20 45.30(17) . . . . ?
Si10 C3 Si9 C20 163.31(12) . . . . ?
Si6 C3 Si9 C20 -65.34(14) . . . . ?
C4 C3 Si9 C21 -69.89(16) . . . . ?
Si10 C3 Si9 C21 48.12(14) . . . . ?
Si6 C3 Si9 C21 179.48(11) . . . . ?
C4 C3 Si10 C23 153.24(14) . . . . ?
Si6 C3 Si10 C23 -95.14(13) . . . . ?
Si9 C3 Si10 C23 34.54(14) . . . . ?
C4 C3 Si10 C22 -85.59(16) . . . . ?
Si6 C3 Si10 C22 26.03(15) . . . . ?
Si9 C3 Si10 C22 155.71(11) . . . . ?
C4 C3 Si10 C24 34.54(17) . . . . ?
Si6 C3 Si10 C24 146.16(12) . . . . ?
Si9 C3 Si10 C24 -84.16(13) . . . . ?
 
_refine_diff_density_max    0.364
_refine_diff_density_min   -0.509
_refine_diff_density_rms    0.058

_shelxl_version_number 2014-3

_shelx_res_file
;
TITL
REM  Yadorkari-X generated
CELL 0.71073 21.5381 17.9167 20.7925 90.0000 118.8750 90.0000
ZERR 4.0 0.0023 0.0019 0.0033 0.0000 0.0010 0.0000
LATT 7
SYMM -X, +Y, 1/2-Z

REM  SPGR C2/c monoclinic
SFAC C H Si
UNIT 192 464 64
SIZE 0.10 0.05 0.03
TEMP -173.0
L.S. 10
FMAP 2
PLAN -20
ACTA
CONF 2.5
MERG 2
OMIT -10.000000 53.000000
OMIT   2   4  20
OMIT  -3   1   1
OMIT  -6   0   2

WGHT    0.036500    6.332900
FVAR       0.17581
SI1   3    0.000000   -0.227487    0.750000    10.50000    0.01853    0.01296 =
         0.03511    0.00000    0.01513    0.00000
C1    1    0.073618   -0.295391    0.764265    11.00000    0.01813    0.01314 =
         0.02267    0.00098    0.01040    0.00240
C2    1    0.030759   -0.370732    0.740889    11.00000    0.02413    0.01349 =
         0.03079    0.00039    0.01555    0.00131
AFIX  23
H1    2    0.011450   -0.378326    0.687442    11.00000   -1.20000
H2    2    0.063144   -0.412762    0.766706    11.00000   -1.20000
AFIX   0
SI2   3    0.000000   -0.107098    0.750000    10.50000    0.03105    0.01181 =
         0.09742    0.00000    0.04455    0.00000
SI3   3   -0.069127   -0.003405    0.745993    11.00000    0.01768    0.01426 =
         0.02397    0.00031    0.01259    0.00126
SI4   3    0.033166    0.061634    0.829083    11.00000    0.02116    0.01452 =
         0.02014    0.00097    0.01167   -0.00004
SI5   3    0.000000    0.166188    0.750000    10.50000    0.07223    0.01153 =
         0.01821    0.00000    0.01617    0.00000
SI6   3    0.000000    0.286976    0.750000    10.50000    0.03626    0.01238 =
         0.01719    0.00000    0.01189    0.00000
C3    1    0.021666    0.355193    0.828416    11.00000    0.02236    0.01214 =
         0.01763   -0.00045    0.00894    0.00066
C4    1    0.024846    0.430806    0.791539    11.00000    0.02920    0.01423 =
         0.02087   -0.00112    0.00863   -0.00062
AFIX  23
H3    2    0.011679    0.472371    0.813963    11.00000   -1.20000
H4    2    0.074058    0.439446    0.801356    11.00000   -1.20000
AFIX   0
SI7   3    0.144700   -0.303722    0.864290    11.00000    0.02294    0.02142 =
         0.02188    0.00218    0.00828    0.00408
C5    1    0.110879   -0.339709    0.926242    11.00000    0.03781    0.04645 =
         0.02404    0.00969    0.01284    0.00842
AFIX 137
H5    2    0.149801   -0.341148    0.976911    11.00000   -1.50000
H6    2    0.091787   -0.390124    0.910829    11.00000   -1.50000
H7    2    0.073361   -0.306675    0.923382    11.00000   -1.50000
AFIX   0
C6    1    0.187867   -0.211925    0.902286    11.00000    0.03234    0.03013 =
         0.02595   -0.00266    0.00446    0.00201
AFIX 137
H8    2    0.155474   -0.171474    0.874118    11.00000   -1.50000
H9    2    0.231541   -0.207902    0.898834    11.00000   -1.50000
H10   2    0.199249   -0.208204    0.953856    11.00000   -1.50000
AFIX   0
C7    1    0.212727   -0.375614    0.874415    11.00000    0.02842    0.02792 =
         0.03661    0.00702    0.01031    0.00949
AFIX 137
H11   2    0.237705   -0.358773    0.848212    11.00000   -1.50000
H12   2    0.189020   -0.423196    0.853725    11.00000   -1.50000
H13   2    0.246827   -0.382255    0.926572    11.00000   -1.50000
AFIX   0
SI8   3    0.114511   -0.278178    0.701734    11.00000    0.02052    0.01722 =
         0.02445   -0.00063    0.01330    0.00135
C8    1    0.124852   -0.370115    0.664879    11.00000    0.03546    0.02304 =
         0.03700   -0.00349    0.02504    0.00281
AFIX 137
H14   2    0.077988   -0.389694    0.630044    11.00000   -1.50000
H15   2    0.148938   -0.405459    0.705504    11.00000   -1.50000
H16   2    0.153035   -0.363250    0.639825    11.00000   -1.50000
AFIX   0
C9    1    0.059744   -0.216484    0.621881    11.00000    0.03522    0.03135 =
         0.02781    0.00261    0.02084    0.00315
AFIX 137
H17   2    0.051285   -0.168906    0.639599    11.00000   -1.50000
H18   2    0.014273   -0.240792    0.590104    11.00000   -1.50000
H19   2    0.084896   -0.207336    0.593980    11.00000   -1.50000
AFIX   0
C10   1    0.204343   -0.233785    0.748194    11.00000    0.02556    0.02926 =
         0.04080   -0.00070    0.01931   -0.00374
AFIX 137
H20   2    0.220084   -0.224130    0.711928    11.00000   -1.50000
H21   2    0.238027   -0.267387    0.786246    11.00000   -1.50000
H22   2    0.201946   -0.186598    0.770732    11.00000   -1.50000
AFIX   0
C11   1   -0.159727    0.011016    0.740611    11.00000    0.01849    0.02065 =
         0.03307   -0.00093    0.01462    0.00200
C12   1   -0.219117   -0.019912    0.668577    11.00000    0.02315    0.03314 =
         0.03326    0.00502    0.01496    0.00118
AFIX 137
H23   2   -0.265072   -0.009255    0.665576    11.00000   -1.50000
H24   2   -0.213308   -0.073999    0.666837    11.00000   -1.50000
H25   2   -0.217048    0.003687    0.627134    11.00000   -1.50000
AFIX   0
C13   1   -0.170424    0.095442    0.743136    11.00000    0.03027    0.02499 =
         0.08077   -0.00569    0.03243    0.00570
AFIX 137
H26   2   -0.170701    0.119235    0.700558    11.00000   -1.50000
H27   2   -0.131678    0.116134    0.788370    11.00000   -1.50000
H28   2   -0.215722    0.104867    0.742091    11.00000   -1.50000
AFIX   0
C14   1   -0.161925   -0.025016    0.806129    11.00000    0.02713    0.04692 =
         0.03382   -0.00524    0.02087   -0.00539
AFIX 137
H29   2   -0.208385   -0.016105    0.802547    11.00000   -1.50000
H30   2   -0.124830   -0.003180    0.851800    11.00000   -1.50000
H31   2   -0.153967   -0.078862    0.806041    11.00000   -1.50000
AFIX   0
C15   1    0.078671    0.049282    0.933410    11.00000    0.02598    0.02204 =
         0.02159    0.00119    0.01132    0.00194
C16   1    0.089329   -0.034602    0.950829    11.00000    0.04874    0.02866 =
         0.02810    0.00741    0.01861    0.01037
AFIX 137
H32   2    0.111216   -0.041962    1.004052    11.00000   -1.50000
H33   2    0.120260   -0.055371    0.932925    11.00000   -1.50000
H34   2    0.043308   -0.059959    0.926619    11.00000   -1.50000
AFIX   0
C17   1    0.151247    0.087414    0.969427    11.00000    0.02696    0.04732 =
         0.02698   -0.00400    0.01020   -0.00072
AFIX 137
H35   2    0.145464    0.140328    0.955809    11.00000   -1.50000
H36   2    0.181787    0.063506    0.952617    11.00000   -1.50000
H37   2    0.172980    0.082836    1.022928    11.00000   -1.50000
AFIX   0
C18   1    0.031748    0.080857    0.963576    11.00000    0.03487    0.02333 =
         0.02543   -0.00017    0.01778   -0.00254
AFIX 137
H38   2    0.055933    0.075262    1.017110    11.00000   -1.50000
H39   2   -0.013313    0.053647    0.942077    11.00000   -1.50000
H40   2    0.022607    0.133861    0.950838    11.00000   -1.50000
AFIX   0
SI9   3   -0.052416    0.361707    0.853851    11.00000    0.02311    0.02271 =
         0.02654   -0.00802    0.01327   -0.00134
C19   1   -0.076045    0.270300    0.878855    11.00000    0.04228    0.03347 =
         0.05342   -0.01076    0.03530   -0.01090
AFIX 137
H41   2   -0.120892    0.275134    0.879858    11.00000   -1.50000
H42   2   -0.038524    0.255004    0.927446    11.00000   -1.50000
H43   2   -0.081156    0.232654    0.842421    11.00000   -1.50000
AFIX   0
C20   1   -0.135870    0.402046    0.778655    11.00000    0.02803    0.05668 =
         0.04015   -0.01361    0.01515    0.00669
AFIX 137
H44   2   -0.153092    0.370412    0.734906    11.00000   -1.50000
H45   2   -0.126481    0.452381    0.766989    11.00000   -1.50000
H46   2   -0.171857    0.404527    0.794585    11.00000   -1.50000
AFIX   0
C21   1   -0.029075    0.428542    0.931651    11.00000    0.03805    0.03123 =
         0.03396   -0.00908    0.02121    0.00103
AFIX 137
H47   2   -0.017283    0.477265    0.918991    11.00000   -1.50000
H48   2    0.011822    0.409384    0.976041    11.00000   -1.50000
H49   2   -0.069567    0.433898    0.940569    11.00000   -1.50000
AFIX   0
SI10  3    0.111209    0.341530    0.913769    11.00000    0.02078    0.01930 =
         0.01874    0.00125    0.00676   -0.00099
C22   1    0.179545    0.295782    0.896048    11.00000    0.02406    0.04506 =
         0.02893    0.00976    0.01146    0.00738
AFIX 137
H50   2    0.220969    0.282781    0.942925    11.00000   -1.50000
H51   2    0.193854    0.330203    0.868953    11.00000   -1.50000
H52   2    0.159621    0.250388    0.866981    11.00000   -1.50000
AFIX   0
C23   1    0.105725    0.283817    0.985312    11.00000    0.03538    0.03125 =
         0.02491    0.00523    0.01374    0.00460
AFIX 137
H53   2    0.083488    0.235795    0.964072    11.00000   -1.50000
H54   2    0.077255    0.310021    1.003393    11.00000   -1.50000
H55   2    0.153543    0.275253    1.026131    11.00000   -1.50000
AFIX   0
C24   1    0.147921    0.434629    0.956876    11.00000    0.02857    0.02741 =
         0.03299   -0.00299    0.00271   -0.00579
AFIX 137
H56   2    0.111660    0.462512    0.962450    11.00000   -1.50000
H57   2    0.161806    0.462823    0.925447    11.00000   -1.50000
H58   2    0.189456    0.427136    1.005226    11.00000   -1.50000

AFIX   0
HKLF 4 1 1 0 0 0 1 0 0 0 1

REM
REM R1 =  0.0363 for    5514 Fo > 4sig(Fo)  and  0.0617 for all    7243 data
REM    309 parameters refined using      0 restraints

END

WGHT      0.0365      6.3424

REM Highest difference peak  0.364,  deepest hole -0.509,  1-sigma level  0.058
Q1    1   0.1821 -0.3399  0.8760  11.00000  0.05    0.36
Q2    1   0.1112  0.0619  0.9506  11.00000  0.05    0.34
Q3    1   0.0367  0.1348  0.8194  11.00000  0.05    0.33
Q4    1  -0.0429 -0.2637  0.7402  11.00000  0.05    0.32
Q5    1  -0.0217  0.0389  0.7876  11.00000  0.05    0.32
Q6    1   0.1622 -0.2641  0.7315  11.00000  0.05    0.31
Q7    1  -0.1237  0.0036  0.7391  11.00000  0.05    0.31
Q8    1  -0.0722  0.3160  0.8638  11.00000  0.05    0.30
Q9    1  -0.1849  0.0020  0.7044  11.00000  0.05    0.30
Q10   1   0.1228  0.3988  0.9415  11.00000  0.05    0.30
Q11   1   0.0766  0.0143  0.9415  11.00000  0.05    0.29
Q12   1   0.1272 -0.3221  0.6923  11.00000  0.05    0.29
Q13   1   0.0610  0.0542  0.9009  11.00000  0.05    0.29
Q14   1  -0.0728  0.2371  0.7244  11.00000  0.05    0.29
Q15   1  -0.0501 -0.2010  0.6313  11.00000  0.05    0.27
Q16   1   0.1161 -0.3033  0.7869  11.00000  0.05    0.27
Q17   1   0.0597  0.0637  0.9477  11.00000  0.05    0.27
Q18   1   0.1375  0.3190  0.8902  11.00000  0.05    0.27
Q19   1   0.1641 -0.2603  0.8713  11.00000  0.05    0.26
Q20   1   0.0000 -0.1732  0.7500  10.50000  0.05    0.26
;
_shelx_res_checksum    9337

_shelx_hkl_file
;
   2   0  -2 6934.04  124.37
   2   0  -2 6730.94  122.66
   4   0  -4  856.32   16.02
   4   0  -4  857.71   16.18
   6   0  -6 1694.53   30.82
   6   0  -6 1671.39   30.42
   8   0  -8 1948.78   35.83
   8   0  -8 2003.49   36.37
  10   0 -10  865.10   17.81
  10   0 -10  898.58   17.67
  12   0 -12    8.48    2.98
  12   0 -12    8.59    3.47
  14   0 -14  245.49    8.71
  14   0 -14  248.95    8.50
  16   0 -16    0.79    4.29
  16   0 -16    3.21    3.84
  18   0 -18  679.75   16.67
  18   0 -18  677.42   16.26
  20   0 -20  247.08   10.08
   1  -1  -1   23.17    1.15
   1   1  -1   26.11    1.25
   3  -1  -3   37.06    2.39
   3  -1  -3   36.59    2.66
   3   1  -3   36.00    2.71
   5   1  -5   78.45    4.25
   5  -1  -5   78.38    4.26
   5  -1  -5   74.24    4.01
   5   1  -5   77.38    4.12
   7  -1  -7   39.43    3.62
   7   1  -7   41.67    2.77
   7  -1  -7   44.14    3.00
   7   1  -7   40.20    2.80
   9  -1  -9   33.77    2.97
   9   1  -9   35.01    3.26
   9   1  -9   34.68    3.12
   9  -1  -9   32.93    3.28
  11  -1 -11  146.05    6.31
  11   1 -11  140.38    6.03
  11   1 -11  137.12    6.11
  11  -1 -11  150.21    5.92
  13  -1 -13    5.64    3.13
  13  -1 -13   10.37    3.88
  13   1 -13    1.82    3.69
  13   1 -13    2.19    3.21
  15  -1 -15   81.04    6.79
  15   1 -15   77.06    6.78
  15   1 -15   73.73    6.51
  15  -1 -15   74.49    6.24
  17   1 -17   67.97    5.54
  17  -1 -17   66.18    5.36
  17   1 -17   65.92    5.65
  17  -1 -17   63.26    5.69
  19   1 -19   66.84    6.05
  19  -1 -19   60.67    6.19
  19   1 -19   65.11    5.99
   0  -2   0  355.23    8.08
   0  -2   0  362.47    6.99
   0   2   0  388.61    7.07
   2  -2  -2  168.86    3.80
   2  -2  -2  178.04    4.18
   2   2  -2  187.93    4.29
   4  -2  -4 1286.95   23.67
   4  -2  -4 1290.19   23.69
   4   2  -4 1310.59   23.98
   6  -2  -6 1910.27   34.84
   6  -2  -6 1954.22   34.99
   6   2  -6 1921.25   35.25
   6   2  -6 1940.74   34.61
   8  -2  -8   54.57    4.11
   8  -2  -8   53.97    4.34
   8   2  -8   53.94    4.23
   8   2  -8   57.53    4.48
  10  -2 -10   69.74    4.55
  10  -2 -10   71.25    4.93
  10   2 -10   67.59    5.01
  10   2 -10   64.44    4.79
  12  -2 -12   78.44    5.88
  12  -2 -12   84.09    5.31
  12   2 -12   88.38    5.67
  12   2 -12   90.92    5.77
  14   2 -14   39.26    4.55
  14  -2 -14   41.14    4.98
  14   2 -14   39.63    4.54
  14  -2 -14   46.70    4.23
  16   2 -16   23.20    4.46
  16  -2 -16   24.73    4.27
  16  -2 -16   19.46    4.92
  16   2 -16   27.08    4.67
  18   2 -18    4.24    4.40
  18  -2 -18   -2.21    4.83
  18   2 -18   -2.26    4.50
  20   2 -20   -3.64    4.71
  20  -2 -20    1.49    5.29
  -1   3   1 3527.39   62.65
  -1  -3   1 3510.77   68.73
   1  -3  -1 3672.90   70.00
   1  -3  -1 3275.91   62.29
   1   3  -1 3590.40   62.10
  -1  -3   1 3401.42   62.51
   3  -3  -3  316.33    6.80
   3  -3  -3  316.78    7.45
   3   3  -3  326.42    7.60
   5  -3  -5  849.71   16.01
   5  -3  -5  856.24   16.38
   7  -3  -7   13.00    2.11
   7   3  -7   12.87    2.47
   7  -3  -7   10.09    2.56
   9   3  -9 1956.37   36.52
   9  -3  -9 1967.90   35.98
   9   3  -9 1955.62   35.62
   9  -3  -9 1939.18   35.97
  11   3 -11   21.80    3.41
  11   3 -11   21.25    3.38
  11  -3 -11   20.08    3.64
  11  -3 -11   27.72    3.19
  13  -3 -13   -0.33    3.83
  13   3 -13   -0.76    3.27
  13   3 -13   -0.79    3.63
  13  -3 -13   -1.76    3.01
  15  -3 -15  280.55    9.87
  15  -3 -15  290.88    9.43
  15   3 -15  285.48    9.40
  15   3 -15  290.03   10.12
  17  -3 -17    6.84    4.88
  17   3 -17    3.77    4.34
  17   3 -17    3.20    4.25
  19  -3 -19  106.97    8.38
  19   3 -19  115.91    8.13
  21   3 -21   -5.23    5.01
  21  -3 -21   15.73    6.21
   0  -4   0  127.57    4.50
   0  -4   0  125.89    5.47
   0   4   0  133.91    4.55
   2   4  -2  182.83    5.83
   2  -4  -2  182.25    4.77
   2  -4  -2  174.71    5.64
   4  -4  -4   -1.73    2.13
   4   4  -4    1.45    1.95
   4  -4  -4    1.13    1.48
   6  -4  -6    6.81    1.80
   6  -4  -6    5.76    2.49
   6   4  -6    5.77    2.30
   8  -4  -8  125.31    4.84
   8   4  -8  128.96    5.69
   8  -4  -8  132.26    5.88
  10   4 -10   87.24    5.04
  10   4 -10   84.63    5.57
  10  -4 -10   90.42    4.87
  10  -4 -10   85.61    5.82
  12   4 -12   13.92    3.62
  12   4 -12   14.83    3.61
  12  -4 -12   11.80    3.16
  12  -4 -12   23.13    4.29
  14  -4 -14   12.21    3.76
  14  -4 -14    7.15    4.63
  14   4 -14   11.90    4.18
  14   4 -14   17.72    4.25
  16   4 -16   36.73    5.07
  16   4 -16   36.76    4.81
  16  -4 -16   33.17    5.29
  18  -4 -18   -1.23    5.15
  18   4 -18    4.67    4.67
  20  -4 -20   29.66    6.30
  20   4 -20   38.17    5.94
  22  -4 -22   23.61    6.81
  -1  -5   1   64.57    5.25
   1  -5  -1   52.11    4.42
  -1  -5   1   62.73    3.82
  -1   5   1   51.04    3.41
   1  -5  -1   48.74    4.23
   1   5  -1   56.07    4.05
   3   5  -3  481.61    9.96
   3  -5  -3  453.30    9.82
   3  -5  -3  453.54    9.12
   5   5  -5   28.54    2.65
   5  -5  -5   27.49    1.95
   5  -5  -5   32.38    2.92
   7  -5  -7  458.66   10.61
   7  -5  -7  464.33    9.77
   7   5  -7  472.00   10.87
   9  -5  -9  152.38    6.35
   9   5  -9  160.48    6.44
   9  -5  -9  155.41    5.40
  11   5 -11    6.43    3.21
  11   5 -11    5.58    3.38
  11  -5 -11    5.92    2.81
  11  -5 -11    1.86    3.65
  13  -5 -13  341.25    9.22
  13  -5 -13  333.39   10.42
  13   5 -13  338.31   10.47
  13   5 -13  338.72    9.63
  15   5 -15   -0.45    4.08
  15   5 -15   -1.77    4.09
  15  -5 -15   -0.28    4.88
  17   5 -17   64.74    6.01
  17  -5 -17   56.88    6.18
  19   5 -19   89.08    7.93
  19  -5 -19   85.98    7.33
  21   5 -21    4.94    5.53
  21  -5 -21   11.98    6.38
   0  -6   0   95.88    5.24
   0  -6   0   99.14    4.33
   0   6   0   97.65    3.99
   2  -6  -2  821.95   17.55
  -2  -6   2  820.70   15.66
  -2   6   2  811.92   15.50
  -2  -6   2  802.68   18.46
   2  -6  -2  805.02   15.88
   2   6  -2  862.10   16.07
   4  -6  -4   86.80    3.47
   4   6  -4   81.71    4.44
   4  -6  -4   85.04    4.65
   6  -6  -6  528.70   11.68
   6   6  -6  537.94   11.81
   6  -6  -6  520.41   10.61
   8  -6  -8   31.69    3.67
   8   6  -8   28.89    3.35
   8  -6  -8   33.18    2.61
  10  -6 -10  537.64   11.57
  10   6 -10  520.65   12.62
  10  -6 -10  537.29   12.64
  12   6 -12   11.95    3.94
  12  -6 -12   15.33    3.29
  12  -6 -12    7.87    4.46
  12   6 -12   11.36    3.71
  14   6 -14   60.42    5.58
  14   6 -14   60.87    4.99
  14  -6 -14   59.77    6.01
  16  -6 -16   22.19    5.43
  16   6 -16   24.97    4.58
  16   6 -16   23.11    5.07
  18  -6 -18   -2.71    5.48
  18   6 -18    5.32    4.85
  20  -6 -20   -0.68    6.06
  20   6 -20    1.24    5.15
  22  -6 -22   21.75    7.33
  22   6 -22   21.79    6.43
   1  -7  -1  218.19    6.38
   1  -7  -1  220.77    7.22
   1   7  -1  232.03    6.38
  -1  -7   1  221.60    7.80
  -1  -7   1  219.53    6.17
  -1   7   1  227.60    5.85
   3   7  -3  853.17   16.61
   3  -7  -3  837.36   16.57
  -3   7   3  822.28   15.96
   3  -7  -3  830.80   18.13
   5   7  -5  135.06    5.37
   5  -7  -5  135.51    5.91
   5  -7  -5  130.47    4.38
   7  -7  -7   10.26    2.21
   7   7  -7    8.86    2.98
   7  -7  -7    9.78    3.35
   9  -7  -9   40.24    2.99
   9  -7  -9   43.23    4.36
   9   7  -9   44.57    3.94
  11  -7 -11   88.39    6.97
  11   7 -11   75.57    6.34
  11  -7 -11   74.93    5.01
  13  -7 -13    8.99    5.10
  13   7 -13    9.09    4.41
  13   7 -13    8.84    4.06
  15   7 -15   35.21    4.65
  15   7 -15   33.23    5.16
  15  -7 -15   33.26    5.73
  17   7 -17   48.77    6.00
  17  -7 -17   51.70    6.49
  19   7 -19  153.62    9.51
  19  -7 -19  160.73    9.85
  21   7 -21  105.07    9.36
  21  -7 -21  117.88   10.06
   0  -8   0    1.65    3.02
   0  -8   0   -2.04    2.56
   0   8   0    4.75    2.27
   2  -8  -2 1068.11   22.93
   2  -8  -2 1081.80   20.73
  -2  -8   2 1077.43   20.44
  -2  -8   2 1058.00   23.97
   2   8  -2 1090.11   20.75
  -2   8   2 1066.37   20.19
   4   8  -4  537.78   12.03
   4  -8  -4  569.87   12.33
  -4   8   4  544.25   11.36
   4  -8  -4  543.16   13.00
   6  -8  -6    0.76    2.08
   6   8  -6   -1.43    2.71
   6  -8  -6   -1.65    3.19
   8  -8  -8   -1.57    3.63
   8  -8  -8    7.16    2.40
   8   8  -8    7.52    3.22
  10  -8 -10    1.75    4.23
  10  -8 -10    0.19    2.71
  10   8 -10   -3.79    3.53
  12  -8 -12  345.47   11.28
  12   8 -12  361.88   11.02
  14   8 -14  570.28   13.54
  14  -8 -14  566.11   14.86
  14   8 -14  570.43   15.03
  16   8 -16   11.95    4.99
  16  -8 -16   12.25    5.73
  18  -8 -18   18.81    6.29
  18   8 -18   25.53    5.82
  20  -8 -20   -2.33    6.50
  20   8 -20    7.98    5.87
  22   8 -22   71.35    7.91
  22  -8 -22   56.26    8.39
  -1  -9   1   -2.31    2.83
   1  -9  -1   -0.52    2.98
  -1  -9   1    1.78    3.48
  -1   9   1    2.20    2.36
   1  -9  -1   -5.53    3.05
   1   9  -1    1.29    2.64
   3  -9  -3   41.42    3.78
   3  -9  -3   39.82    3.59
  -3   9   3   39.77    3.69
   3   9  -3   34.73    3.36
   5   9  -5   13.97    3.06
  -5   9   5   17.83    2.80
   5  -9  -5   14.48    3.62
   5  -9  -5   13.24    3.20
   7  -9  -7  114.96    6.56
   7   9  -7  115.66    5.81
   7  -9  -7  114.37    4.72
   9  -9  -9  263.36    7.19
   9  -9  -9  270.32    9.38
   9   9  -9  244.25    8.46
  11  -9 -11   53.17    5.84
  11   9 -11   50.12    5.03
  13  -9 -13   -1.09    5.16
  13   9 -13   -0.90    4.34
  15  -9 -15   89.72    8.06
  15   9 -15   85.80    7.69
  17   9 -17   37.85    6.10
  17  -9 -17   29.02    6.32
  19  -9 -19    4.11    6.42
  19   9 -19    8.66    5.71
  21   9 -21    3.09    6.24
  21  -9 -21    6.80    7.42
   0 -10   0   66.92    6.25
   0 -10   0   75.43    5.19
   0  10   0   70.02    4.87
   2 -10  -2   32.29    3.82
  -2 -10   2   35.74    5.08
   2  10  -2   35.16    3.48
   2 -10  -2   36.90    3.93
  -2 -10   2   39.56    3.74
  -2  10   2   32.07    3.01
  -4  10   4   36.63    2.98
   4  10  -4   39.14    3.67
   4 -10  -4   36.08    3.89
   4 -10  -4   40.92    4.16
   6 -10  -6  139.50    6.97
   6  10  -6  130.53    6.22
  -6  10   6  127.95    5.53
   6 -10  -6  130.60    6.52
   8  10  -8   12.86    3.84
   8 -10  -8   15.27    2.88
   8 -10  -8   21.24    4.71
  10 -10 -10   27.37    5.33
  10  10 -10   34.84    4.70
  12  10 -12  140.56    7.99
  12 -10 -12  124.60    8.77
  14  10 -14   15.47    5.12
  14 -10 -14   22.24    5.80
  16  10 -16   11.90    5.45
  16 -10 -16   13.98    6.13
  18  10 -18   72.55    7.24
  18 -10 -18   70.62    7.59
  20 -10 -20  170.46   10.97
  20  10 -20  149.02   10.37
   1  11  -1 2478.53   45.50
  -1  11   1 2381.67   45.16
  -1 -11   1 2471.87   45.27
  -1 -11   1 2559.05   51.45
   1 -11  -1 2497.39   45.42
   1 -11  -1 2515.25   50.88
  -3  11   3  440.52   10.20
   3 -11  -3  451.99   11.34
   3  11  -3  448.58   10.94
   3 -11  -3  469.48   12.46
   5 -11  -5  184.12    7.76
  -5  11   5  178.98    6.02
   5 -11  -5  191.69    7.77
   5  11  -5  175.86    6.88
   7  11  -7  200.07    7.83
  -7  11   7  194.71    6.66
   7 -11  -7  196.97    8.50
   9  11  -9  211.67    8.73
   9 -11  -9  233.31    9.83
  11  11 -11  174.64    8.51
  11 -11 -11  194.49    9.37
  13 -11 -13   77.31    6.92
  13  11 -13   79.20    7.45
  15 -11 -15   -0.19    6.02
  15  11 -15    5.21    5.42
  17  11 -17   22.53    6.15
  17 -11 -17   14.88    6.60
  19  11 -19   66.73    7.66
  19 -11 -19   75.55    8.32
   0 -12   0   80.39    6.04
   0  12   0   67.95    5.42
   0 -12   0   73.32    7.02
  -2  12   2    2.19    3.00
   2 -12  -2   -7.03    4.02
   2  12  -2    1.16    3.33
  -2 -12   2    2.23    3.81
   2 -12  -2   -1.55    4.09
   4 -12  -4    5.93    4.39
   4 -12  -4    7.87    3.91
  -4  12   4    9.69    3.03
   4  12  -4    8.18    3.65
   6 -12  -6  235.80    9.03
   6  12  -6  207.97    8.01
  -6  12   6  219.88    6.83
   8 -12  -8  308.63   10.51
   8  12  -8  292.76    9.99
  10 -12 -10   29.04    5.90
  10  12 -10   21.12    4.81
  12 -12 -12    5.48    5.72
  12  12 -12   -1.62    4.43
  14  12 -14  131.32    8.55
  14 -12 -14  122.90    9.21
  16 -12 -16  239.31   11.26
  16  12 -16  244.76   10.93
  18  12 -18   26.27    6.50
  18 -12 -18   16.70    7.53
  20 -12 -20    6.10    7.86
  20  12 -20   18.84    6.82
   1  13  -1   64.04    5.55
   1 -13  -1   66.69    5.80
  -1 -13   1   73.38    6.55
   1 -13  -1   70.11    5.53
  -1  13   1   60.88    4.51
  -1 -13   1   67.98    6.36
   3  13  -3   27.65    4.20
   3 -13  -3   37.03    5.15
  -3  13   3   31.38    3.72
   5 -13  -5   19.91    5.31
  -5  13   5   15.42    3.40
   5  13  -5   13.99    4.06
   7  13  -7    2.53    4.28
   7 -13  -7    7.84    5.51
   9  13  -9   26.96    4.87
   9 -13  -9   19.37    5.80
  11 -13 -11   56.81    6.58
  11  13 -11   41.41    5.56
  13 -13 -13    1.25    6.22
  13  13 -13   13.47    5.38
  15 -13 -15   47.84    7.55
  15  13 -15   55.44    6.86
  17  13 -17    1.35    5.95
  17 -13 -17    2.78    7.15
  19  13 -19   21.32    6.89
  19 -13 -19   16.47    8.08
   0  14   0 1912.42   37.05
   0 -14   0 1939.56   37.38
   0 -14   0 2066.50   42.72
   2  14  -2  121.38    6.90
  -2  14   2  118.32    6.36
  -2 -14   2  122.44    7.57
   2 -14  -2  118.51    7.92
  -4  14   4   -0.52    3.49
   4  14  -4   -3.41    3.94
   4 -14  -4   -3.60    5.15
   6 -14  -6   37.38    6.15
   6  14  -6   23.51    4.73
   8  14  -8  394.48   11.77
   8 -14  -8  401.41   12.50
  10  14 -10  502.92   13.85
  10 -14 -10  503.83   14.38
  12 -14 -12    4.58    6.34
  12  14 -12    4.30    5.20
  14  14 -14   34.46    6.25
  14 -14 -14   22.93    7.04
  16  14 -16   10.23    6.21
  16 -14 -16   -0.29    7.15
  18 -14 -18   54.19    8.92
  18  14 -18   73.87    8.08
  -1  15   1   60.08    4.90
   1 -15  -1   56.00    6.26
  -1 -15   1   63.65    6.07
   1  15  -1   50.86    4.83
   3  15  -3   60.81    5.26
  -3  15   3   61.02    4.72
   3 -15  -3   60.82    6.25
   5 -15  -5   22.56    5.83
   5  15  -5   26.80    4.72
   7 -15  -7    5.29    5.72
   7  15  -7   14.54    4.70
   9 -15  -9   18.36    6.14
   9  15  -9   23.10    5.18
  11  15 -11    3.23    5.22
  11 -15 -11   -2.41    6.29
  13  15 -13    9.67    5.76
  13 -15 -13    3.34    6.84
  15 -15 -15   11.55    7.27
  15  15 -15   22.85    6.26
  17 -15 -17   -7.93    7.67
  17  15 -17   -4.02    6.38
   0  16   0   27.44    4.45
   0 -16   0   25.31    5.79
  -2 -16   2   43.13    5.88
   2  16  -2   48.58    4.78
  -2  16   2   45.07    4.49
   2 -16  -2   47.79    6.28
   4  16  -4    5.37    4.15
   4 -16  -4    6.47    5.62
   6 -16  -6  276.71   10.59
   6  16  -6  273.30    9.52
   8  16  -8   82.09    7.37
   8 -16  -8   85.65    7.59
  10 -16 -10   44.72    7.29
  10  16 -10   53.56    6.15
  12 -16 -12  167.98   10.22
  12  16 -12  177.14    9.44
  14  16 -14   11.60    6.20
  14 -16 -14    8.83    7.41
  16 -16 -16   48.33    8.94
  16  16 -16   42.06    7.44
  -1  17   1   11.99    4.19
   1  17  -1   17.63    4.50
   1 -17  -1   15.11    5.77
  -1 -17   1   16.84    5.68
   3  17  -3  226.17    8.51
   3 -17  -3  213.47    9.75
   5  17  -5   48.61    5.35
   5 -17  -5   30.49    6.44
   7  17  -7  130.27    7.80
   7 -17  -7  118.92    8.92
   9  17  -9   38.70    5.85
   9 -17  -9   18.07    6.91
  11  17 -11   63.60    6.63
  11 -17 -11   45.07    7.81
  13 -17 -13   92.47    8.92
  13  17 -13   85.76    7.81
  15 -17 -15    7.88    7.96
  15  17 -15   10.78    6.70
   0 -18   0  337.35   11.59
   0  18   0  332.06   10.00
   2  18  -2  239.27    8.45
   2 -18  -2  224.47    9.93
   4  18  -4   60.70    5.65
   4 -18  -4   65.06    7.11
   6  18  -6   22.94    5.18
   6 -18  -6    4.39    6.47
   8  18  -8    1.99    4.90
   8 -18  -8    9.10    6.66
  10 -18 -10    7.89    7.27
  10  18 -10   25.33    5.73
  12 -18 -12   56.88    8.41
  12  18 -12   76.21    7.36
  14  18 -14   59.99    7.77
  14 -18 -14   49.93    9.02
   1  19  -1   13.51    4.25
  -1 -19   1    3.39    6.11
   1 -19  -1    7.17    6.41
   3  19  -3  274.09    9.37
   3 -19  -3  266.40   11.18
   5  19  -5   15.45    4.93
   5 -19  -5   -5.04    6.35
   7  19  -7   24.61    5.51
   7 -19  -7    2.66    6.84
   9  19  -9   81.86    7.87
   9 -19  -9   60.15    8.06
  11  19 -11   89.21    8.41
  11 -19 -11   68.73    8.86
  13  19 -13  164.95   10.25
   0 -20   0    1.22    6.12
   2  20  -2  178.09    7.89
   2 -20  -2  146.68   10.01
   4  20  -4   11.16    4.78
   4 -20  -4    1.26    6.56
   6  20  -6  130.21    8.35
   6 -20  -6  116.09    9.61
   8 -20  -8   74.05    8.62
   8  20  -8   96.91    8.07
  10  20 -10  133.98    9.01
  10 -20 -10   97.31    9.52
   1 -21  -1   64.19    8.03
   3  21  -3   19.90    4.90
   3 -21  -3   -0.73    6.69
   5  21  -5   20.87    5.20
   5 -21  -5   -3.74    7.33
   7 -21  -7    3.21    7.57
   7  21  -7   23.12    5.82
   9 -21  -9   15.55    8.24
   9  21  -9   42.82    6.47
   2 -22  -2  158.72   10.88
   4 -22  -4  109.68    9.99
   6 -22  -6   13.59    8.21
   6  22  -6   31.15    5.89
   8  22  -8   31.51    6.28
   1 -23  -1    7.55    7.92
   3 -23  -3   76.08    9.40
  20   0 -19    3.23    4.95
  18   0 -17   -4.97    3.79
  18   0 -17   -0.23    4.46
  16   0 -15    0.83    3.69
  16   0 -15   -1.44    4.29
  14   0 -13   -0.40    3.80
  14   0 -13    2.65    3.09
  12   0 -11   -0.63    2.58
  12   0 -11    2.05    3.29
  10   0  -9   -2.21    2.23
  10   0  -9    1.16    2.85
   8   0  -7   -0.71    2.38
   8   0  -7    0.19    1.87
   6   0  -5   -0.32    2.16
   6   0  -5   -1.07    1.71
   4   0  -3   -0.88    1.74
   4   0  -3   -1.40    1.37
   2   0  -1    0.03    0.75
   2   0  -3   -7.10    1.01
   2   0  -3   -5.06    1.24
   4   0  -5    0.09    2.15
   4   0  -5   -1.45    2.22
   6   0  -7   -1.37    2.05
   6   0  -7   -2.13    1.98
   8   0  -9   -0.77    2.54
   8   0  -9   -1.69    2.33
  10   0 -11    0.07    2.95
  10   0 -11    0.21    2.57
  12   0 -13    0.75    3.52
  12   0 -13   -0.50    3.05
  14   0 -15   -1.90    4.08
  14   0 -15   -2.09    3.62
  16   0 -17   -1.04    3.89
  16   0 -17    2.46    4.35
  18   0 -19   -2.33    4.74
  18   0 -19    1.60    4.49
  21  -1 -20   -1.67    5.24
  21   1 -20    4.45    5.03
  19   1 -18    5.65    4.76
  19  -1 -18   -0.54    4.87
  19   1 -18    1.22    4.30
  17  -1 -16  111.56    7.24
  17  -1 -16  111.72    6.80
  17   1 -16  116.16    7.00
  17   1 -16   97.23    7.19
  15   1 -14   62.97    5.24
  15  -1 -14   58.66    5.67
  15  -1 -14   56.76    5.33
  15   1 -14   60.87    4.77
  13   1 -12  196.65    7.31
  13  -1 -12  212.72    7.80
  13  -1 -12  204.50    7.05
  13   1 -12  201.75    7.52
  11  -1 -10   87.32    5.34
  11   1 -10   78.52    5.33
  11  -1 -10   80.38    4.75
  11   1 -10   79.04    5.13
   9   1  -8    1.76    2.63
   9  -1  -8   -1.69    2.02
   9   1  -8   -0.91    2.16
   9  -1  -8   -0.25    2.61
   7   1  -6  127.35    4.81
   7  -1  -6  125.19    4.94
   7  -1  -6  134.65    4.42
   7   1  -6  125.96    4.55
   5   1  -4   28.85    2.64
   5  -1  -4   34.66    2.91
   5   1  -4   27.33    2.33
   5  -1  -4   31.79    2.14
   3  -1  -2   46.94    2.51
   3  -1  -2   45.98    1.89
   3   1  -2   50.81    2.39
   1  -1   0   88.70    2.07
   1   1   0   92.09    2.16
  -1  -1   2  255.20    6.32
   1  -1  -2  259.25    5.05
   1   1  -2  258.13    5.28
   1  -1  -2  252.81    5.19
   3   1  -4  114.65    3.70
   3  -1  -4  116.28    3.96
   3   1  -4  109.53    4.31
   3  -1  -4  119.38    4.10
   5   1  -6   39.05    2.74
   5   1  -6   46.14    3.46
   5  -1  -6   45.40    3.74
   5  -1  -6   48.19    3.69
   7  -1  -8   34.51    2.77
   7  -1  -8   37.34    2.92
   7   1  -8   33.26    2.93
   7   1  -8   34.35    2.74
   9   1 -10   39.88    3.32
   9  -1 -10   47.48    3.55
   9  -1 -10   44.43    3.38
   9   1 -10   44.18    3.52
  11  -1 -12  184.51    6.81
  11   1 -12  183.59    6.94
  11   1 -12  181.41    6.69
  11  -1 -12  186.20    6.81
  13  -1 -14   50.72    4.74
  13  -1 -14   47.48    4.36
  13   1 -14   46.50    4.43
  13   1 -14   42.13    4.52
  15  -1 -16  298.75    9.83
  15  -1 -16  299.05    9.87
  15   1 -16  301.07    9.68
  15   1 -16  288.77    9.94
  17   1 -18  108.42    7.22
  17  -1 -18   99.51    7.41
  17   1 -18  110.61    7.46
  17  -1 -18   96.58    7.30
  19  -1 -20    5.98    5.11
  19   1 -20    0.79    4.74
  22  -2 -21    5.76    5.66
  20  -2 -19   70.66    6.52
  20   2 -19   61.30    6.22
  20   2 -19   62.49    6.12
  18  -2 -17   -1.00    4.61
  18   2 -17    0.85    4.10
  18   2 -17   -1.35    4.52
  16   2 -15   35.41    4.70
  16  -2 -15   28.25    5.09
  16  -2 -15   28.94    4.18
  16   2 -15   36.09    4.99
  14   2 -13  216.49    8.13
  14  -2 -13  217.75    7.53
  14   2 -13  227.79    8.06
  14  -2 -13  219.87    8.26
  12   2 -11   12.86    3.42
  12  -2 -11   14.19    3.70
  12   2 -11    9.03    3.02
  12  -2 -11   11.54    2.82
  10  -2  -9   50.90    4.78
  10   2  -9   46.87    3.40
  10  -2  -9   52.13    4.09
  10   2  -9   46.57    3.58
   8  -2  -7  541.75   11.65
   8  -2  -7  549.84   11.23
   8   2  -7  543.78   11.45
   8   2  -7  550.68   11.75
   6  -2  -5  334.03    7.92
   6   2  -5  338.55    7.76
   6  -2  -5  340.33    7.25
   4  -2  -3    3.41    2.42
   4   2  -3    0.84    2.05
   4  -2  -3    7.05    1.51
   2  -2  -1   78.77    2.66
   2   2  -1   85.65    2.80
   0  -2  -1    8.18    0.93
   0  -2  -1   11.71    1.10
   0  -2   1   10.42    1.67
   0  -2   1    9.91    0.89
   0   2  -1   10.17    1.01
   2  -2  -3  451.69    8.73
   2   2  -3  446.07    8.90
   2  -2  -3  431.82    8.70
   4  -2  -5   11.89    2.46
   4  -2  -5   11.40    2.17
   4   2  -5   10.09    2.29
   6   2  -7  238.94    6.03
   6   2  -7  235.91    6.65
   6  -2  -7  242.00    6.38
   6  -2  -7  238.14    6.37
   8   2  -9   10.97    2.74
   8   2  -9    6.92    2.55
   8  -2  -9    8.35    2.47
   8  -2  -9    8.64    2.77
  10  -2 -11    7.24    3.17
  10   2 -11    2.62    2.92
  10   2 -11    2.11    2.85
  10  -2 -11    2.45    2.64
  12  -2 -13  289.80    8.83
  12   2 -13  285.22    8.41
  12   2 -13  266.81    8.97
  12  -2 -13  285.62    8.64
  14  -2 -15  132.69    7.39
  14   2 -15  130.23    7.08
  14  -2 -15  129.31    7.09
  14   2 -15  131.55    7.31
  16   2 -17   43.08    5.04
  16  -2 -17   48.40    5.36
  16  -2 -17   37.19    4.85
  16   2 -17   48.38    5.23
  18   2 -19   92.78    7.76
  18  -2 -19   95.48    7.96
  20   2 -21   -2.73    4.95
  23  -3 -22    7.75    6.54
  21  -3 -20    3.10    5.73
  19   3 -18  192.56    8.92
  19   3 -18  198.06    9.18
  19  -3 -18  204.41    9.25
  17   3 -16  146.88    7.61
  17   3 -16  137.86    8.01
  17  -3 -16  137.72    7.88
  15   3 -14  104.09    7.19
  15  -3 -14  108.29    6.47
  15   3 -14  107.90    6.92
  15  -3 -14  107.29    7.22
  13   3 -12   60.65    4.59
  13  -3 -12   60.48    4.96
  13   3 -12   59.58    4.44
  13  -3 -12   61.13    5.12
  11   3 -10 1668.44   31.10
  11  -3 -10 1646.86   31.45
  11   3 -10 1660.88   31.78
  11  -3 -10 1695.30   31.21
   9  -3  -8 1735.40   32.47
   9   3  -8 1741.30   32.75
   9  -3  -8 1778.26   32.25
   9   3  -8 1759.72   32.15
   7  -3  -6  532.60   10.73
   7   3  -6  542.48   11.29
   7  -3  -6  529.59   11.33
   5  -3  -4  109.78    3.46
   5  -3  -4  108.66    4.65
   5   3  -4  104.99    4.40
   3   3  -2    5.74    2.18
   3  -3  -2    2.12    2.18
  -1  -3   0 8949.78  162.74
   1  -3   0 9732.87  183.12
  -1   3   0 9303.29  164.61
   1   3   0 9522.52  164.18
   1  -3   0 8398.07  162.22
  -1  -3   2 2299.48   45.63
   1  -3  -2 2267.78   41.20
  -1  -3   2 2306.97   40.83
   1   3  -2 2480.40   41.02
   1  -3  -2 2093.94   40.44
   3  -3  -4  904.84   17.03
   3  -3  -4  905.33   17.19
   3   3  -4  924.59   17.46
   5  -3  -6  231.35    5.89
   5   3  -6  239.22    6.35
   5  -3  -6  229.42    6.29
   7   3  -8  494.36   11.21
   7  -3  -8  483.83   10.85
   7  -3  -8  498.42   10.70
   7   3  -8  492.29   10.32
   9   3 -10 1441.02   26.57
   9  -3 -10 1420.78   27.01
   9  -3 -10 1434.30   27.07
   9   3 -10 1406.34   27.59
  11  -3 -12  256.97    8.07
  11   3 -12  268.45    7.89
  11  -3 -12  265.58    8.34
  11   3 -12  254.10    8.57
  13  -3 -14  244.06    8.86
  13  -3 -14  253.36    8.45
  13   3 -14  242.19    8.18
  13   3 -14  238.13    8.96
  15   3 -16    2.24    4.08
  15  -3 -16    7.53    4.68
  15   3 -16    3.65    4.17
  15  -3 -16    0.92    3.86
  17  -3 -18   75.18    6.24
  17   3 -18   73.53    7.08
  19  -3 -20   48.71    6.49
  19   3 -20   36.55    5.82
  21   3 -22  160.78    9.84
  22  -4 -21  180.47   10.54
  20  -4 -19   47.66    6.59
  20   4 -19   46.96    6.02
  18  -4 -17    2.02    4.88
  18   4 -17    7.09    4.59
  18   4 -17   11.28    4.69
  16  -4 -15    4.07    4.60
  16   4 -15   -2.78    3.91
  16   4 -15    4.27    4.26
  14   4 -13  152.15    7.45
  14   4 -13  142.95    7.34
  14  -4 -13  144.93    7.57
  14  -4 -13  146.89    6.73
  12   4 -11   33.99    3.89
  12   4 -11   38.26    3.91
  12  -4 -11   39.24    3.41
  12  -4 -11   37.81    4.27
  10   4  -9   14.76    2.93
  10  -4  -9   19.35    3.46
  10  -4  -9   13.21    2.43
  10   4  -9   17.09    2.99
   8   4  -7    4.13    2.52
   8  -4  -7    5.05    1.93
   8  -4  -7    3.79    2.85
   6   4  -5    3.24    2.04
   6  -4  -5    1.37    1.45
   6  -4  -5   -1.45    2.33
   4   4  -3    0.02    2.11
   4  -4  -3    2.09    2.23
   4  -4  -3    4.09    1.32
   2  -4  -1  293.26    8.00
  -2   4   1  294.11    6.28
   2  -4  -1  288.44    6.99
   2   4  -1  291.18    7.26
   0  -4   1    1.39    2.75
   0  -4   1   -4.01    2.04
   0  -4  -1    0.50    2.14
   0   4   1   -1.82    2.15
   0   4  -1   -5.34    2.11
   0  -4  -1   -2.88    2.24
   2  -4  -3  152.38    5.39
  -2  -4   3  153.43    7.20
   2  -4  -3  151.59    4.44
   2   4  -3  132.24    4.77
   4  -4  -5   10.84    1.84
   4  -4  -5    9.92    2.32
   4   4  -5    7.72    2.13
   6  -4  -7  227.99    6.04
   6   4  -7  231.87    6.86
   6  -4  -7  226.97    6.51
   8  -4  -9  566.14   12.39
   8   4  -9  571.28   12.87
   8  -4  -9  569.21   12.06
   8   4  -9  561.42   11.80
  10   4 -11   35.19    3.84
  10   4 -11   29.63    3.36
  10  -4 -11   28.53    3.19
  10  -4 -11   26.90    3.83
  12  -4 -13   87.28    5.84
  12  -4 -13   84.90    6.76
  12   4 -13   90.14    5.94
  12   4 -13   80.88    6.46
  14   4 -15   11.76    4.41
  14   4 -15   11.86    4.25
  14  -4 -15   14.81    5.03
  14  -4 -15    7.16    3.88
  16   4 -17  167.65    7.71
  16  -4 -17  168.30    8.67
  16   4 -17  151.48    8.34
  18   4 -19   26.35    5.44
  18  -4 -19   26.05    5.83
  20   4 -21  256.16   11.29
  20  -4 -21  291.62   11.61
  23  -5 -22   76.02    8.28
  21   5 -20    6.49    5.24
  21  -5 -20   -1.05    6.10
  19   5 -18   11.76    5.07
  19  -5 -18   13.24    5.69
  17   5 -16    7.84    4.46
  17  -5 -16    9.34    5.23
  17   5 -16   16.05    4.64
  15   5 -14  396.57   11.05
  15  -5 -14  389.71   11.82
  15   5 -14  399.21   11.80
  13  -5 -12  161.89    7.77
  13   5 -12  158.81    7.07
  13   5 -12  158.72    7.42
  13  -5 -12  169.78    6.23
  11  -5 -10   59.30    4.40
  11   5 -10   63.44    5.38
  11  -5 -10   62.63    5.92
   9  -5  -8  112.45    4.45
   9  -5  -8  113.14    5.99
   9   5  -8  108.04    5.56
   7  -5  -6  143.81    5.68
   7   5  -6  150.84    5.68
   7  -5  -6  138.76    4.28
   5   5  -4    8.90    2.18
   5  -5  -4    7.06    2.41
   5  -5  -4    7.12    1.48
   3   5  -2 1419.54   25.24
  -3   5   2 1333.30   24.58
   3  -5  -2 1319.70   24.86
   1   5   0   -0.63    1.99
  -1   5   0   -2.18    1.84
  -1  -5   0    0.38    2.19
   1  -5   0    5.09    2.78
   1  -5   0    1.89    2.20
  -1  -5   0    4.97    2.57
   1  -5  -2   41.98    3.74
   1  -5  -2   39.03    3.95
  -1  -5   2   48.94    3.64
  -1  -5   2   50.66    3.58
   1   5  -2   35.35    3.60
   3  -5  -4   31.83    2.75
   3  -5  -4   38.80    2.96
   3   5  -4   32.31    2.66
   5  -5  -6  284.67    7.39
   5   5  -6  283.02    7.59
   5  -5  -6  283.29    6.69
   7  -5  -8  379.72    9.47
   7   5  -8  385.49    9.67
   7  -5  -8  376.55    8.65
   9   5 -10   29.06    3.69
   9  -5 -10   22.76    3.66
   9  -5 -10   29.17    2.98
  11  -5 -12  135.58    6.94
  11  -5 -12  142.83    6.19
  11   5 -12  135.30    6.18
  11   5 -12  128.59    7.00
  13  -5 -14    6.45    4.58
  13  -5 -14   10.92    3.72
  13   5 -14   11.36    4.00
  13   5 -14   14.56    4.36
  15   5 -16   79.22    6.22
  15  -5 -16   88.83    7.65
  15   5 -16   82.52    6.58
  17   5 -18    4.08    4.67
  17  -5 -18   -0.97    5.20
  19  -5 -20    4.08    5.96
  19   5 -20   -4.67    4.92
  21   5 -22    1.41    5.77
  21  -5 -22   -3.56    6.51
  22   6 -21    2.15    5.60
  22  -6 -21   11.02    6.68
  20   6 -19   17.64    5.62
  20  -6 -19   17.46    6.24
  18   6 -17   -5.68    4.48
  18  -6 -17   -1.54    5.38
  16  -6 -15  412.32   12.48
  16   6 -15  420.07   11.49
  16   6 -15  419.17   12.47
  14   6 -13   27.22    4.50
  14   6 -13   34.97    4.83
  14  -6 -13   27.49    5.22
  12   6 -11    4.61    3.56
  12  -6 -11    8.86    4.22
  12  -6 -11    4.53    2.82
  10  -6  -9 1752.00   33.31
  10  -6  -9 1792.71   32.35
  10   6  -9 1744.87   33.58
   8  -6  -7   -0.09    1.84
   8   6  -7   -0.70    2.61
   8  -6  -7    1.74    3.03
   6   6  -5   31.43    2.97
   6  -6  -5   25.92    3.18
   6  -6  -5   29.37    2.85
   4   6  -3  159.62    5.49
   4  -6  -3  153.73    5.48
  -4   6   3  149.44    4.40
   2  -6  -1  143.48    5.92
   2  -6  -1  141.82    5.16
   2   6  -1  147.09    4.97
  -2  -6   1  146.21    5.10
  -2   6   1  147.03    4.38
   0  -6  -1   51.94    4.31
   0  -6  -1   56.56    4.12
   0  -6   1   51.97    5.34
   0  -6   1   55.15    3.85
   0   6   1   55.68    3.49
   0   6  -1   57.85    3.83
   2  -6  -3   25.42    2.10
   2   6  -3   23.05    2.40
   2  -6  -3   22.52    2.69
   2  -6  -3   29.45    2.56
  -2  -6   3   24.85    3.64
   4  -6  -5  922.29   17.95
   4  -6  -5  908.38   17.31
   4   6  -5  933.96   18.09
   6  -6  -7  191.91    6.69
   6   6  -7  191.44    6.65
   6  -6  -7  180.25    5.45
   8  -6  -9  519.64   12.13
   8  -6  -9  530.30   11.24
   8   6  -9  518.99   12.34
  10   6 -11  551.69   13.53
  10  -6 -11  559.05   12.33
  10  -6 -11  561.56   13.21
  12   6 -13  142.97    6.75
  12  -6 -13  139.14    7.94
  12   6 -13  139.25    7.63
  12  -6 -13  139.78    6.70
  14  -6 -15  286.03   10.43
  14   6 -15  297.37   10.60
  14   6 -15  290.57    9.34
  16  -6 -17   19.35    5.48
  16   6 -17   19.34    5.19
  18  -6 -19  188.04   10.08
  18   6 -19  187.39    9.76
  20   6 -21    1.73    5.53
  20  -6 -21   -0.08    6.16
  22  -6 -23   84.44    8.67
  22   6 -23   66.21    7.93
  23  -7 -22  138.25   11.03
  23   7 -22  131.10   10.14
  21  -7 -20  237.66   11.60
  21   7 -20  225.73   11.25
  19   7 -18    7.60    5.20
  19  -7 -18    0.58    5.86
  17   7 -16   51.96    5.78
  17  -7 -16   40.69    6.05
  17   7 -16   40.55    5.13
  15  -7 -14  172.66    8.89
  15   7 -14  159.77    7.81
  15   7 -14  158.92    8.37
  13   7 -12  313.66   10.09
  13  -7 -12  309.12   10.33
  11   7 -10  210.10    7.95
  11  -7 -10  216.56    6.39
  11  -7 -10  214.50    8.34
   9   7  -8    2.05    2.90
   9  -7  -8    3.35    3.50
   9  -7  -8    1.51    2.07
   7   7  -6  109.28    5.38
   7  -7  -6  110.88    4.06
   7  -7  -6  115.54    5.82
   5  -7  -4   78.81    5.21
   5   7  -4   78.93    4.95
   3  -7  -2  245.19    7.71
   3   7  -2  249.88    6.85
   3  -7  -2  248.59    6.89
  -3   7   2  247.54    5.91
   1  -7   0    5.23    2.85
  -1   7   0    3.85    2.04
  -1  -7   0    2.55    2.70
   1  -7   0    7.98    2.48
  -1  -7   0    1.24    2.36
   1   7   0    4.75    2.15
  -1  -7   2  394.70   11.15
  -1   7   2  388.01    8.63
   1  -7  -2  388.04    9.02
   1   7  -2  397.74    8.88
   1  -7  -2  389.34    9.70
  -1  -7   2  396.43    8.70
   3  -7  -4  496.39   11.58
   3  -7  -4  490.09   10.22
   3   7  -4  506.79   10.98
   3  -7  -4  507.74   11.20
   5   7  -6  337.07    8.70
   5  -7  -6  342.45    8.88
   5  -7  -6  334.16    7.78
   7  -7  -8  970.03   19.49
   7  -7  -8  959.02   18.48
   7   7  -8  960.06   19.71
   9  -7 -10   99.86    4.97
   9   7 -10   95.66    6.24
   9  -7 -10  107.10    6.45
  11   7 -12    2.36    3.88
  11  -7 -12    4.07    4.44
  11  -7 -12    8.03    3.25
  13   7 -14  160.79    8.57
  13   7 -14  165.59    7.36
  13  -7 -14  147.59    8.46
  15   7 -16    8.57    4.93
  15  -7 -16    8.68    5.19
  17   7 -18   11.14    5.30
  17  -7 -18   11.17    5.74
  19  -7 -20   55.47    7.37
  19   7 -20   61.76    6.90
  21  -7 -22  100.76    8.95
  21   7 -22  104.03    9.48
  22   8 -21   28.40    6.77
  22  -8 -21   35.28    7.67
  20  -8 -19    4.08    6.16
  20   8 -19    6.88    5.44
  18  -8 -17    2.30    5.63
  18   8 -17    6.13    5.05
  16   8 -15  500.95   14.24
  16  -8 -15  521.87   14.39
  16   8 -15  511.85   13.03
  14   8 -13   92.25    7.20
  14  -8 -13   97.18    7.89
  12   8 -11  138.20    7.39
  12  -8 -11  151.50    8.00
  10  -8  -9 1994.91   36.31
  10   8  -9 1966.08   37.95
  10  -8  -9 2033.29   37.84
   8   8  -7  234.76    7.67
   8  -8  -7  239.33    8.12
   8  -8  -7  235.23    6.10
   6   8  -5   18.83    2.98
   6  -8  -5   16.86    3.43
   4  -8  -3  587.94   14.06
  -4   8   3  575.06   11.60
   4  -8  -3  585.37   12.67
   4   8  -3  582.26   12.69
   2  -8  -1   32.94    3.79
  -2   8   1   28.02    2.54
   2   8  -1   26.31    2.95
  -2  -8   1   26.39    3.03
   2  -8  -1   28.19    3.16
   0  -8  -1   24.81    3.10
   0   8  -1   27.88    2.82
   0  -8  -1   28.08    3.47
   0  -8   1   28.07    3.02
   0   8   1   28.05    2.65
   0  -8   1   26.08    3.82
   2   8  -3  663.03   13.55
   2  -8  -3  640.89   13.58
  -2  -8   3  618.40   16.08
  -2  -8   3  642.77   13.09
  -2   8   3  648.58   13.12
   2  -8  -3  653.26   14.56
   4  -8  -5 1683.11   30.58
   4  -8  -5 1624.98   29.80
   4  -8  -5 1650.90   33.22
   4   8  -5 1559.64   30.51
   6  -8  -7  274.96    7.10
   6  -8  -7  292.18    8.55
   6   8  -7  279.70    8.11
   8   8  -9 1366.09   27.11
   8  -8  -9 1346.98   25.66
   8  -8  -9 1396.18   26.84
  10  -8 -11  744.77   16.75
  10  -8 -11  730.54   15.20
  10   8 -11  716.65   16.67
  12  -8 -13   -3.30    4.88
  12   8 -13    5.18    4.55
  14   8 -15   88.55    7.82
  14  -8 -15   94.04    7.90
  16   8 -17    7.63    5.13
  16  -8 -17    9.57    5.80
  18   8 -19   53.77    6.75
  18  -8 -19   52.12    7.15
  20  -8 -21   81.21    8.15
  20   8 -21   75.15    7.61
  22  -8 -23  104.64    9.67
  22   8 -23   92.80    8.67
  21   9 -20  -10.36    5.52
  21  -9 -20    1.64    7.02
  19  -9 -18    1.89    6.15
  19   9 -18    2.99    5.26
  17   9 -16   88.10    8.20
  17  -9 -16  104.23    8.71
  15  -9 -14  294.62   10.92
  15   9 -14  283.27   10.50
  15   9 -14  281.73    9.39
  13  -9 -12    4.46    5.21
  13   9 -12    8.90    4.45
  11   9 -10   16.32    4.14
  11  -9 -10   15.93    4.86
   9  -9  -8    8.30    4.24
   9   9  -8   10.11    3.55
   7   9  -6   11.37    3.19
   7  -9  -6   12.17    3.79
   5   9  -4  148.48    6.10
   5  -9  -4  146.74    6.40
   5  -9  -4  142.16    6.77
  -5   9   4  134.81    4.75
  -3   9   2  125.04    4.73
   3   9  -2  119.83    5.50
   3  -9  -2  126.65    6.68
   3  -9  -2  117.17    5.89
  -1   9   0    5.34    2.52
   1  -9   0    4.14    2.85
  -1  -9   0    5.13    2.96
  -1  -9   0    6.25    3.30
   1  -9   0    4.87    3.36
   1   9   0    3.63    2.57
  -1   9   2   62.37    4.34
  -1  -9   2   78.18    6.95
   1  -9  -2   59.70    5.05
   1   9  -2   62.42    4.73
  -1  -9   2   57.42    4.65
   1  -9  -2   64.96    5.55
   3   9  -4   21.02    3.12
   3  -9  -4   26.29    3.64
   3  -9  -4   29.17    3.11
  -3   9   4   23.15    2.90
   5  -9  -6  416.97   10.79
   5  -9  -6  410.50    9.25
   5  -9  -6  415.94   10.64
   5   9  -6  402.39   10.29
   7   9  -8  240.21    7.98
   7  -9  -8  250.67    8.52
   7  -9  -8  244.94    6.91
   9  -9 -10   52.50    5.40
   9  -9 -10   61.63    5.02
   9   9 -10   64.47    5.01
  11   9 -12   37.44    5.12
  11  -9 -12   42.06    5.84
  13  -9 -14   87.18    8.11
  13   9 -14   84.63    7.66
  15  -9 -16  413.52   12.98
  15   9 -16  415.97   13.29
  17  -9 -18    6.46    6.14
  17   9 -18    5.97    5.58
  19   9 -20   40.01    6.76
  19  -9 -20   43.79    7.55
  21   9 -22    4.28    6.26
  21  -9 -22   10.49    7.80
  22  10 -21   54.55    7.65
  22 -10 -21   69.35    8.83
  20 -10 -19   14.29    7.14
  20  10 -19   12.49    5.99
  18 -10 -17   19.85    6.67
  18  10 -17   29.74    6.13
  16 -10 -15  159.43    9.40
  16  10 -15  142.47    8.90
  14 -10 -13   94.24    8.24
  14  10 -13   91.69    7.45
  12  10 -11    2.80    4.26
  12 -10 -11   15.73    5.48
  10 -10  -9   57.66    5.67
  10  10  -9   59.79    4.89
   8  10  -7   34.34    3.99
   8 -10  -7   31.59    4.74
  -6  10   5    3.99    2.32
   6 -10  -5    1.11    3.80
   6  10  -5   -0.64    2.96
   6 -10  -5   -1.37    3.49
   4 -10  -3  227.87    7.63
   4 -10  -3  233.74    8.41
  -4  10   3  219.95    6.18
   4  10  -3  213.76    7.27
  -2  10   1  579.30   12.15
  -2 -10   1  569.93   12.56
   2  10  -1  561.72   12.54
   2 -10  -1  576.26   12.72
   2 -10  -1  567.61   14.62
   0 -10  -1  354.34   10.29
   0  10  -1  343.29    8.72
   0 -10   1  354.44   11.47
   0  10   1  332.42    8.49
   0 -10   1  352.27    9.02
   0 -10  -1  350.86    9.14
   2 -10  -3   39.41    3.99
   2 -10  -3   41.51    3.73
  -2 -10   3   48.59    5.42
   2  10  -3   44.34    3.65
  -2 -10   3   43.20    3.74
  -2  10   3   37.90    3.13
  -4  10   5  478.41   10.93
   4 -10  -5  502.69   12.19
   4 -10  -5  498.70   11.95
   4  10  -5  483.89   11.53
   6 -10  -7  225.91    6.69
   6 -10  -7  227.84    8.37
   6 -10  -7  235.88    8.12
   6  10  -7  226.26    8.02
   8 -10  -9  213.51    6.65
   8  10  -9  204.58    8.29
   8 -10  -9  214.19    8.86
  10 -10 -11  188.09    9.05
  10  10 -11  187.37    8.57
  12  10 -13    0.35    4.37
  12 -10 -13   -6.69    5.22
  14 -10 -15   95.29    8.42
  14  10 -15   99.11    8.13
  16  10 -17  120.27    8.98
  16 -10 -17  121.58    9.42
  18 -10 -19    8.23    6.72
  18  10 -19    3.01    5.82
  20  10 -21   51.91    7.70
  20 -10 -21   52.44    8.34
  21 -11 -20   31.34    8.15
  21  11 -20   25.69    6.86
  19  11 -18  105.92    9.13
  19 -11 -18  106.16    9.79
  17  11 -16   13.55    5.66
  17 -11 -16   15.29    6.63
  15  11 -14   62.97    6.37
  15 -11 -14   60.28    6.99
  13  11 -12  385.94   11.92
  13 -11 -12  396.14   12.53
  11 -11 -10   30.94    5.92
  11  11 -10   30.65    4.82
   9 -11  -8  220.35    9.12
   9  11  -8  197.89    8.25
   7 -11  -6  223.22    8.70
  -7  11   6  204.31    6.21
   7 -11  -6  213.62    8.60
   7  11  -6  201.69    7.58
   5  11  -4   10.77    3.51
   5 -11  -4   11.47    3.79
  -5  11   4    8.51    2.65
   5 -11  -4    8.51    4.08
   3 -11  -2  316.75    9.14
  -3  11   2  323.65    8.07
   3  11  -2  313.34    8.78
   3 -11  -2  317.13   10.35
   1  11   0  695.09   15.00
  -1 -11   0  695.92   17.42
  -1 -11   0  721.72   15.25
   1 -11   0  714.11   17.89
   1 -11   0  726.03   15.18
  -1  11   0  692.17   14.66
  -1 -11   2  136.35    6.23
  -1  11   2  138.94    5.70
   1 -11  -2  130.75    7.00
   1  11  -2  125.30    5.77
   1 -11  -2  145.15    6.69
  -1 -11   2  132.29    8.51
   3 -11  -4  271.39    8.75
  -3  11   4  261.12    7.47
   3 -11  -4  271.90    8.64
   3  11  -4  258.11    7.88
   5  11  -6    7.86    3.52
   5 -11  -6    9.05    4.24
  -5  11   6   11.47    3.26
   7  11  -8   52.39    4.75
   7 -11  -8   48.61    5.56
   9 -11 -10  581.36   14.93
   9  11 -10  551.07   14.42
  11  11 -12   45.12    5.36
  11 -11 -12   36.24    6.15
  13  11 -14  402.30   12.88
  13 -11 -14  423.57   13.00
  15 -11 -16   -4.35    6.11
  15  11 -16    2.66    5.52
  17 -11 -18   13.37    6.95
  17  11 -18   13.81    6.03
  19 -11 -20   51.04    8.35
  19  11 -20   46.79    7.33
  20  12 -19   32.89    6.88
  20 -12 -19   30.39    8.13
  18  12 -17   26.04    6.32
  18 -12 -17   22.14    7.21
  16  12 -15   26.32    5.96
  16 -12 -15   16.86    6.59
  14 -12 -13    3.68    6.00
  14  12 -13   12.49    5.14
  12 -12 -11   57.29    6.51
  12  12 -11   59.91    5.67
  10  12  -9    0.30    4.36
  10 -12  -9    4.24    5.45
   8 -12  -7    5.53    4.97
   8  12  -7    2.91    3.99
   6 -12  -5   19.03    4.88
  -6  12   5   16.38    3.02
   6  12  -5   21.22    4.06
   6 -12  -5   20.07    4.54
  -4  12   3    0.08    2.86
   4  12  -3    4.00    3.60
   4 -12  -3   -0.53    4.01
   4 -12  -3    5.18    4.34
   2  12  -1   42.95    4.08
   2 -12  -1   52.69    5.28
  -2 -12   1   52.80    4.79
   2 -12  -1   53.34    4.81
  -2  12   1   44.72    3.78
   0 -12   1   16.87    5.15
   0  12   1   18.50    3.41
   0 -12  -1   17.08    4.39
   0 -12  -1   14.88    4.19
   0 -12   1   21.79    4.20
   0  12  -1   16.96    3.48
   2 -12  -3    0.98    4.19
   2 -12  -3    0.51    3.63
   2  12  -3   -1.00    3.18
  -2  12   3   -1.61    2.98
  -2 -12   3   -1.53    3.71
  -2 -12   3   -0.16    5.51
  -4  12   5   93.89    5.39
   4 -12  -5  107.84    7.01
   4  12  -5   91.38    5.99
   6  12  -7   48.53    4.81
   6 -12  -7   55.03    5.63
  -6  12   7   62.21    5.37
   8  12  -9   44.74    5.32
   8 -12  -9   44.50    6.08
  10 -12 -11  119.75    8.53
  10  12 -11  129.34    7.98
  12 -12 -13   80.10    7.35
  12  12 -13   80.92    7.60
  14 -12 -15   85.04    7.77
  14  12 -15   88.34    8.37
  16  12 -17   22.70    6.28
  16 -12 -17   -2.24    6.72
  18 -12 -19   31.28    7.79
  18  12 -19   38.93    7.13
  19  13 -18   47.94    7.39
  19 -13 -18   42.12    8.28
  17  13 -16   31.38    6.55
  17 -13 -16   15.33    7.18
  15  13 -14   47.27    6.40
  15 -13 -14   44.82    7.30
  13  13 -12    5.57    4.96
  13 -13 -12   -0.20    5.93
  11 -13 -10   -0.33    5.49
  11  13 -10    9.13    4.63
   9 -13  -8   36.36    6.11
   9  13  -8   37.10    5.10
   7 -13  -6  215.72    9.62
   7  13  -6  191.92    8.14
   5 -13  -4  112.83    7.78
   5  13  -4  101.34    6.43
  -5  13   4  106.46    5.54
   3  13  -2   -0.49    3.80
   3 -13  -2    1.21    4.45
  -3  13   2    1.07    3.29
   3 -13  -2    1.05    4.48
  -1 -13   0   -1.21    4.37
  -1  13   0    6.16    3.45
   1 -13   0    1.48    4.34
   1  13   0   -1.05    3.68
   1 -13   0    3.25    5.07
  -1 -13   2  468.90   14.81
   1  13  -2  447.80   11.34
   1 -13  -2  477.07   13.47
   1 -13  -2  465.18   12.15
  -1  13   2  449.74   11.18
  -1 -13   2  470.20   11.84
   3 -13  -4  743.88   16.77
   3  13  -4  696.01   15.79
  -3  13   4  739.53   15.33
   5  13  -6  127.71    7.28
  -5  13   6  113.36    6.13
   5 -13  -6  131.54    8.02
   7  13  -8    1.22    4.32
   7 -13  -8    5.09    5.51
   9  13 -10   36.79    5.30
   9 -13 -10   39.78    6.18
  11  13 -12   -3.04    4.85
  11 -13 -12   -5.02    5.85
  13  13 -14   45.02    6.30
  13 -13 -14   31.58    6.88
  15  13 -16   47.59    6.90
  15 -13 -16   35.45    7.56
  17  13 -18   48.84    7.20
  17 -13 -18   43.05    8.31
  19 -13 -20   13.38    8.60
  18 -14 -17   23.26    8.01
  18  14 -17   33.00    6.97
  16 -14 -15    9.92    7.16
  16  14 -15   22.78    6.12
  14 -14 -13  113.28    9.29
  14  14 -13  111.76    8.32
  12 -14 -11  425.46   13.42
  12  14 -11  421.51   12.75
  10 -14  -9    0.15    5.65
  10  14  -9    7.19    4.67
   8  14  -7  187.14    8.13
   8 -14  -7  196.82    9.55
   6  14  -5   43.77    5.01
   6 -14  -5   50.57    6.20
   4  14  -3  311.55    9.65
   4 -14  -3  307.51   10.51
  -4  14   3  309.31    8.69
   2 -14  -1  213.00   10.57
   2 -14  -1  222.18    8.96
   2  14  -1  213.13    8.20
  -2  14   1  197.23    7.33
  -2 -14   1  203.56    8.75
   0  14  -1  367.61   10.33
   0 -14  -1  392.01   11.29
   0 -14   1  414.77   14.21
   0  14   1  390.53   10.59
   0 -14   1  386.53   11.09
   2 -14  -3  248.06    9.50
  -2  14   3  243.58    8.15
   2  14  -3  227.79    8.05
  -2 -14   3  246.54    8.97
   4  14  -5   75.39    6.74
  -4  14   5   86.32    5.73
   4 -14  -5   89.29    7.93
   6  14  -7  333.94   10.54
   6 -14  -7  343.47   11.41
   8 -14  -9   35.08    6.23
   8  14  -9   36.58    5.28
  10  14 -11   32.03    5.62
  10 -14 -11   19.49    6.31
  12 -14 -13  248.68   11.19
  12  14 -13  255.95   10.65
  14 -14 -15   37.95    7.53
  14  14 -15   52.23    6.99
  16  14 -17   68.38    7.80
  16 -14 -17   51.37    8.33
  18 -14 -19   19.67    8.42
  17 -15 -16   21.32    8.01
  17  15 -16   19.69    6.84
  15  15 -14   52.41    6.84
  15 -15 -14   40.64    7.73
  13 -15 -12   46.82    7.40
  13  15 -12   43.45    6.20
  11 -15 -10   65.97    7.42
  11  15 -10   69.40    6.27
   9 -15  -8  331.57   11.59
   9  15  -8  317.19   10.65
   7  15  -6  125.66    7.31
   7 -15  -6  119.68    8.54
   5  15  -4   59.03    5.33
   5 -15  -4   68.91    6.56
   3  15  -2    8.36    4.36
   3 -15  -2    6.48    5.38
  -3  15   2    7.58    3.79
   1 -15   0  150.36    8.14
  -1 -15   0  147.70    8.52
  -1  15   0  142.58    6.85
   1  15   0  152.94    7.20
   1 -15  -2  115.27    8.13
  -1  15   2  108.75    6.71
   1  15  -2   99.21    6.47
  -1 -15   2  110.70    7.75
  -1 -15   2  115.24   10.97
   3 -15  -4  265.37   10.02
  -3  15   4  260.97    8.32
   3  15  -4  253.04    8.72
   5 -15  -6  983.25   21.57
   5  15  -6  959.52   20.87
   7 -15  -8  831.43   19.74
   7  15  -8  849.10   19.14
   9  15 -10  621.69   15.93
   9 -15 -10  612.24   16.40
  11 -15 -12  121.65    9.22
  11  15 -12  110.67    8.32
  13  15 -14   37.80    6.50
  13 -15 -14   28.78    7.21
  15  15 -16   30.64    6.80
  15 -15 -16   25.32    7.83
  17 -15 -18   39.82    8.85
  16 -16 -15    1.57    7.58
  16  16 -15    7.83    6.24
  14 -16 -13   37.29    7.85
  14  16 -13   51.18    6.71
  12  16 -11   25.08    5.84
  12 -16 -11   14.97    6.91
  10 -16  -9   30.44    6.76
  10  16  -9   30.57    5.59
   8 -16  -7    8.64    5.98
   8  16  -7   12.85    4.81
   6 -16  -5    5.18    5.67
   6  16  -5    9.74    4.34
   4  16  -3   65.73    6.24
   4 -16  -3   69.38    6.55
  -2 -16   1    3.10    5.30
   2  16  -1    2.49    4.24
  -2  16   1    2.96    3.78
   2 -16  -1   -1.07    5.43
   0  16  -1   16.33    4.17
   0 -16   1   25.35    5.52
   0  16   1   22.47    4.46
   0 -16  -1    9.19    5.44
   2  16  -3   49.99    4.81
   2 -16  -3   45.99    6.25
  -2  16   3   44.27    4.73
   4 -16  -5   66.00    6.64
   4  16  -5   71.65    6.54
   6 -16  -7    7.83    5.82
   6  16  -7    9.39    4.84
   8  16  -9   28.79    5.37
   8 -16  -9   26.21    6.54
  10  16 -11   55.45    6.39
  10 -16 -11   43.32    7.33
  12 -16 -13   45.35    7.62
  12  16 -13   54.87    6.87
  14  16 -15    3.78    6.31
  14 -16 -15    4.89    7.39
  16 -16 -17    6.97    8.12
  16  16 -17   12.57    6.97
  15  17 -14   37.51    6.95
  15 -17 -14   11.79    8.09
  13 -17 -12   13.16    7.37
  13  17 -12   11.91    5.82
  11  17 -10  100.18    7.98
  11 -17 -10   90.02    8.42
   9  17  -8   40.31    5.86
   9 -17  -8   38.66    7.16
   7  17  -6   10.69    4.75
   7 -17  -6    6.47    6.19
   5 -17  -4   15.80    6.17
   5  17  -4   28.83    4.90
   3 -17  -2  435.27   12.65
   3  17  -2  415.04   11.57
   1  17   0  627.31   14.97
   1 -17   0  653.78   15.88
  -1 -17   0  637.26   15.93
  -1  17   0  628.76   14.60
  -1  17   2  587.25   13.88
   1  17  -2  553.80   13.79
   1 -17  -2  579.42   15.17
  -1 -17   2  618.31   14.96
   3 -17  -4  131.24    8.58
   3  17  -4  130.08    7.27
   5  17  -6   26.93    4.97
   5 -17  -6   19.97    6.26
   7  17  -8    2.44    4.81
   7 -17  -8    3.66    6.19
   9  17 -10  141.40    8.85
   9 -17 -10  118.11    9.57
  11  17 -12   10.54    5.79
  11 -17 -12   -3.87    6.93
  13 -17 -14   47.68    8.34
  13  17 -14   55.54    7.33
  14 -18 -13   91.09    9.42
  14  18 -13  105.87    9.00
  12  18 -11   44.14    6.53
  12 -18 -11   27.70    7.77
  10  18  -9   18.23    5.74
  10 -18  -9   14.29    7.12
   8 -18  -7    4.21    6.54
   8  18  -7   26.14    5.38
   6 -18  -5   15.23    6.70
   6  18  -5   17.16    4.98
   4  18  -3   37.28    5.16
   4 -18  -3   28.66    6.61
   2 -18  -1   84.20    8.10
   2  18  -1   85.98    6.75
   0  18  -1   26.69    4.43
   0 -18  -1   19.42    6.10
   0 -18   1   11.01    6.01
   0  18   1   32.92    4.86
   2  18  -3   21.15    4.62
   2 -18  -3   15.25    6.07
   4 -18  -5   -0.95    6.13
   4  18  -5   11.81    4.84
   6 -18  -7   -2.53    6.34
   6  18  -7    3.88    4.87
   8  18  -9   38.26    5.82
   8 -18  -9   20.23    7.06
  10 -18 -11   15.69    7.26
  10  18 -11   22.45    5.91
  12  18 -13    7.14    6.09
  12 -18 -13    3.39    7.71
  13 -19 -12   -0.86    8.10
  13  19 -12   13.78    6.27
  11  19 -10   21.08    5.86
  11 -19 -10   -7.25    7.42
   9 -19  -8   11.61    7.06
   9  19  -8   11.25    5.51
   7  19  -6   23.38    5.20
   7 -19  -6   22.72    7.22
   5  19  -4   30.12    5.24
   5 -19  -4   22.70    6.94
   3 -19  -2    2.00    6.30
   3  19  -2   17.62    4.67
   1  19   0   82.91    6.76
  -1 -19   0   72.00    7.44
   1 -19   0   74.39    7.35
  -1 -19   2   69.08    7.35
   1 -19  -2   64.79    7.45
   1  19  -2   87.96    6.46
   3 -19  -4   55.15    7.32
   3  19  -4   68.85    6.44
   5 -19  -6   32.02    7.01
   5  19  -6   31.27    5.39
   7  19  -8   13.87    5.40
   7 -19  -8    1.57    6.80
   9  19 -10   24.09    5.97
   9 -19 -10   17.55    7.48
  11  19 -12   30.35    6.73
  11 -19 -12   16.57    8.09
  12  20 -11   15.59    6.24
  10  20  -9   40.09    6.40
  10 -20  -9   11.77    7.85
   8 -20  -7    3.59    7.26
   8  20  -7    8.86    5.43
   6 -20  -5   -3.44    6.78
   6  20  -5   13.45    5.01
   4 -20  -3   62.72    7.75
   4  20  -3   80.93    6.72
   2  20  -1   32.24    5.04
   2 -20  -1   26.10    6.94
   0 -20  -1   -4.05    6.38
   0 -20   1    4.05    6.19
   2 -20  -3   52.89    7.70
   2  20  -3   92.62    6.75
   4 -20  -5   41.10    7.51
   4  20  -5   56.16    5.81
   6 -20  -7    8.22    7.11
   6  20  -7   28.63    5.63
   8  20  -9   54.31    6.50
   8 -20  -9   25.40    7.85
  10  20 -11  116.94    9.28
  10 -20 -11   95.44    9.55
   9  21  -8   21.56    5.94
   9 -21  -8   -2.87    7.76
   7 -21  -6    6.70    7.60
   7  21  -6   28.86    5.84
   5  21  -4   16.66    5.13
   5 -21  -4   -2.88    7.08
   3  21  -2   39.48    5.27
   3 -21  -2   16.59    7.05
   1 -21   0   16.32    6.83
   1 -21  -2   15.69    7.02
   3 -21  -4   16.38    7.19
   5 -21  -6   38.47    8.00
   5  21  -6   62.67    6.23
   7  21  -8   40.58    6.23
   7 -21  -8   25.72    7.94
   9  21 -10   41.01    6.77
   8  22  -7   33.01    6.15
   6 -22  -5   19.42    8.01
   6  22  -5   49.20    6.24
   4 -22  -3   10.62    7.37
   4  22  -3   30.09    5.50
   2 -22  -1   -1.36    7.22
   0 -22  -1   -0.39    7.29
   2 -22  -3   -4.05    7.50
   4 -22  -5   -6.11    7.39
   6 -22  -7    5.49    8.03
   6  22  -7   36.95    6.05
   8  22  -9   92.24    8.59
   5 -23  -4   13.06    8.32
   3 -23  -2   14.75    8.14
   1 -23   0   -6.48    7.53
   1 -23  -2   -4.01    7.53
   3 -23  -4   11.65    8.37
  22   0 -20   48.53    6.25
  20   0 -18  883.34   20.16
  18   0 -16   66.77    5.89
  18   0 -16   66.24    6.24
  16   0 -14  197.79    7.88
  16   0 -14  197.66    8.55
  14   0 -12  143.33    6.35
  14   0 -12  128.06    7.05
  12   0 -10   14.47    2.75
  12   0 -10   10.50    3.32
  10   0  -8 1116.81   21.73
  10   0  -8 1136.42   21.64
   8   0  -6   11.97    2.48
   8   0  -6   11.41    1.95
   6   0  -4 9377.97  172.72
   6   0  -4 9998.46  173.87
   4   0  -2   42.93    2.93
   4   0  -2   35.86    2.32
  -2   0   0 8506.65  165.48
   0   0  -2 8311.48  151.93
   0   0   2 8546.75  169.70
   2   0  -4 1445.37   26.33
   2   0  -4 1438.28   25.82
   4   0  -6 4452.27   73.75
   4   0  -6 3742.71   71.72
   6   0  -8  538.07   11.63
   6   0  -8  540.91   10.99
   8   0 -10    8.63    2.72
   8   0 -10   10.84    2.80
  10   0 -12  171.95    6.82
  10   0 -12  173.09    6.48
  12   0 -14 1764.50   32.98
  12   0 -14 1732.01   33.84
  14   0 -16  983.14   20.24
  14   0 -16  933.32   20.88
  16   0 -18  180.57    8.22
  16   0 -18  174.70    8.37
  18   0 -20  637.63   16.67
  23  -1 -21   -1.14    5.58
  21   1 -19   35.17    5.80
  21  -1 -19   29.26    5.78
  19   1 -17  137.15    8.03
  19  -1 -17  136.43    7.99
  19   1 -17  132.50    7.74
  17   1 -15   82.63    6.96
  17   1 -15   81.50    6.38
  17  -1 -15   81.65    6.88
  17  -1 -15   72.72    6.01
  15  -1 -13   16.51    3.45
  15   1 -13   11.50    3.62
  15  -1 -13    8.64    4.32
  15   1 -13   10.17    4.19
  13  -1 -11   12.23    3.77
  13   1 -11   10.03    3.61
  13   1 -11    9.64    2.95
  13  -1 -11    8.24    2.73
  11   1  -9   66.86    5.14
  11  -1  -9   64.62    5.33
  11   1  -9   67.11    4.72
  11  -1  -9   71.66    4.52
   9   1  -7  517.48   11.06
   9  -1  -7  508.70   11.35
   9   1  -7  515.16   11.25
   9  -1  -7  517.81   10.82
   7   1  -5 1363.51   25.03
   7   1  -5 1346.48   24.98
   7  -1  -5 1375.24   24.87
   7  -1  -5 1350.86   25.10
   5  -1  -3  366.95    8.57
   5   1  -3  368.43    7.92
   5  -1  -3  356.13    7.48
   3  -1  -1 2642.48   46.89
  -1  -1  -1   57.26    1.95
   1  -1   1   60.14    3.07
  -1   1  -1   59.29    1.88
   1  -1  -3 1629.69   28.67
  -1  -1   3 1637.34   31.95
   1  -1  -3 1400.17   28.16
   1   1  -3 1684.52   28.78
   3  -1  -5  217.23    5.76
   3   1  -5  216.06    6.17
   3   1  -5  219.86    5.34
   3  -1  -5  213.38    6.24
   5  -1  -7 1073.67   20.32
   5   1  -7 1047.25   20.39
   5   1  -7 1061.37   19.54
   5  -1  -7 1064.77   19.71
   7  -1  -9   59.88    4.63
   7  -1  -9   59.00    4.21
   7   1  -9   55.97    4.70
   7   1  -9   51.76    4.16
   9  -1 -11   59.45    4.96
   9   1 -11   56.74    4.66
   9   1 -11   62.26    5.11
   9  -1 -11   61.48    4.78
  11  -1 -13   10.50    3.30
  11   1 -13   11.82    3.33
  11  -1 -13   19.42    3.66
  11   1 -13    8.67    3.41
  13   1 -15   94.60    6.54
  13   1 -15   94.82    6.55
  13  -1 -15   95.55    6.59
  13  -1 -15   85.39    6.52
  15   1 -17    1.82    4.13
  15   1 -17    7.40    4.27
  15  -1 -17    2.58    4.03
  15  -1 -17    2.14    4.34
  17   1 -19   29.86    5.20
  17  -1 -19   30.01    5.29
  17  -1 -19   27.15    5.24
  19   1 -21   -0.07    5.01
  24  -2 -22   66.39    7.81
  22  -2 -20   29.74    6.01
  20  -2 -18  139.46    8.51
  20   2 -18  156.65    8.46
  18   2 -16  159.31    8.02
  18  -2 -16  157.16    8.03
  18   2 -16  158.80    7.94
  16   2 -14    6.86    4.47
  16  -2 -14    4.50    3.49
  16   2 -14    7.72    3.92
  16  -2 -14    3.96    4.56
  14   2 -12    6.10    3.24
  14  -2 -12    2.74    3.98
  14  -2 -12    2.97    2.90
  14   2 -12    4.92    3.84
  12  -2 -10   34.57    4.02
  12  -2 -10   31.51    2.97
  12   2 -10   32.44    3.26
  12   2 -10   26.98    3.60
  10   2  -8    6.22    2.92
  10  -2  -8   11.52    3.14
  10   2  -8   13.48    2.49
  10  -2  -8   14.17    2.24
   8   2  -6   18.45    2.34
   8  -2  -6   17.71    2.77
   8   2  -6   16.77    2.55
   8  -2  -6   17.01    1.92
   6  -2  -4   81.82    3.10
   6  -2  -4   77.42    4.45
   6   2  -4   77.06    3.81
   4   2  -2 1058.86   18.93
   4  -2  -2  973.75   18.80
   2  -2   0    5.21    1.18
   2   2   0    7.52    1.26
   0  -2  -2   27.52    2.23
   0   2  -2   30.14    2.25
   0  -2  -2   25.75    2.24
   0  -2   2   29.74    2.47
   0  -2   2   27.17    1.51
   2  -2  -4   34.94    2.37
   2   2  -4   32.47    2.52
   2  -2  -4   41.82    3.66
   4   2  -6 2594.53   46.63
   4  -2  -6 2561.83   46.38
   4  -2  -6 2571.57   45.78
   4   2  -6 2599.25   45.61
   6   2  -8 1746.30   31.16
   6  -2  -8 1736.53   32.01
   6  -2  -8 1734.98   31.46
   6   2  -8 1699.80   32.21
   8   2 -10  250.41    7.76
   8  -2 -10  255.19    7.45
   8  -2 -10  237.57    7.08
   8   2 -10  245.20    6.79
  10  -2 -12 2031.45   37.35
  10  -2 -12 2029.97   38.01
  10   2 -12 2023.37   38.32
  10   2 -12 2003.02   37.00
  12  -2 -14  688.92   15.51
  12   2 -14  672.43   15.75
  12  -2 -14  675.98   15.12
  12   2 -14  673.60   14.76
  14   2 -16    6.04    4.20
  14  -2 -16    3.17    3.98
  14   2 -16    0.76    4.08
  14  -2 -16   11.09    4.68
  16  -2 -18   28.01    5.14
  16  -2 -18   23.16    4.84
  16   2 -18   38.58    5.22
  18  -2 -20   15.54    5.45
  18   2 -20   13.50    5.05
  20   2 -22   -4.48    5.18
  23  -3 -21    6.26    6.32
  21  -3 -19   -2.51    5.37
  21   3 -19   -3.48    4.87
  19   3 -17   27.83    5.04
  19  -3 -17   25.87    5.53
  19   3 -17   29.02    5.02
  17   3 -15  144.24    7.48
  17   3 -15  140.92    7.58
  17  -3 -15  155.46    8.11
  15  -3 -13  278.94    8.53
  15   3 -13  290.44    9.43
  15   3 -13  281.23    9.40
  15  -3 -13  283.36    9.66
  13   3 -11   15.05    3.67
  13  -3 -11   16.36    3.92
  13   3 -11   19.21    3.36
  13  -3 -11   17.69    2.97
  11  -3  -9  768.01   16.14
  11   3  -9  753.87   15.86
  11   3  -9  771.45   16.11
  11  -3  -9  788.45   15.44
   9  -3  -7  293.67    6.89
   9   3  -7  287.33    7.64
   9  -3  -7  279.09    7.92
   7  -3  -5 1921.94   34.33
   7  -3  -5 1884.16   34.63
   7   3  -5 1917.62   34.80
   5   3  -3   11.91    2.21
   5  -3  -3   11.47    2.48
   3  -3  -1    0.47    2.15
   3   3  -1    1.78    2.02
   1  -3   1 1346.50   27.99
  -1  -3  -1 1358.81   24.85
  -1   3  -1 1418.07   24.94
   1  -3   1 1370.61   24.62
  -1  -3  -1 1393.04   24.76
   1  -3  -3  243.07    5.92
   1  -3  -3  230.52    5.97
  -1  -3   3  236.85    7.89
   1   3  -3  231.18    6.11
   3   3  -5 2327.29   41.87
   3  -3  -5 2343.04   41.26
   3  -3  -5 2277.83   41.53
   5   3  -7   43.67    3.04
   5  -3  -7   43.91    3.74
   5  -3  -7   45.19    3.92
   7   3  -9   18.75    2.54
   7   3  -9   18.16    3.06
   7  -3  -9   16.85    2.71
   7  -3  -9   18.59    2.85
   9   3 -11  257.42    7.16
   9  -3 -11  260.92    7.85
   9   3 -11  266.72    8.28
   9  -3 -11  256.92    7.77
  11  -3 -13   98.84    6.10
  11  -3 -13   88.77    6.32
  11   3 -13  101.75    6.58
  11   3 -13   99.89    5.60
  13  -3 -15    2.39    4.40
  13   3 -15   -5.00    3.78
  13   3 -15    2.02    3.87
  13  -3 -15    0.83    3.64
  15  -3 -17   23.92    4.99
  15  -3 -17   17.54    4.49
  15   3 -17   27.93    4.87
  15   3 -17   20.22    4.45
  17   3 -19   58.68    6.08
  17  -3 -19   49.12    6.08
  19   3 -21   42.65    6.18
  21   3 -23   24.78    6.43
  24  -4 -22   19.63    7.38
  22  -4 -20   81.15    7.34
  20   4 -18    4.16    4.62
  20  -4 -18    2.57    5.37
  20   4 -18    1.70    4.75
  18   4 -16  141.83    7.75
  18  -4 -16  145.66    8.22
  18   4 -16  155.74    8.27
  16   4 -14  108.65    7.16
  16   4 -14  100.12    7.03
  16  -4 -14  108.95    7.56
  14  -4 -12  373.65   10.69
  14   4 -12  364.17   10.25
  14   4 -12  369.33   10.45
  12   4 -10  465.33   11.62
  12   4 -10  482.29   11.41
  12  -4 -10  490.63   11.84
  12  -4 -10  490.06   10.77
  10  -4  -8  116.42    5.84
  10   4  -8  120.92    5.53
  10  -4  -8  128.71    4.68
   8  -4  -6 2619.54   47.71
   8   4  -6 2690.62   48.08
   8  -4  -6 2636.23   47.27
   6  -4  -4  969.73   17.93
   6   4  -4 1023.90   18.86
   6  -4  -4  959.71   18.77
   4   4  -2  210.98    5.97
   4  -4  -2  193.40    5.87
  -4   4   2  201.53    4.42
  -2   4   0  274.52    5.97
   2   4   0  275.43    6.75
   2  -4   0  249.13    7.63
   2  -4   0  244.08    6.36
   0  -4  -2  438.88    9.49
   0  -4   2  422.07   11.05
   0   4  -2  428.95    9.07
   0  -4  -2  448.91    9.64
   0  -4   2  438.59    8.83
   0  -4  -2  437.97    9.12
   2  -4  -4  335.50    7.41
   2   4  -4  332.32    7.81
  -2  -4   4  334.97   10.00
   2  -4  -4  332.96    7.72
   4  -4  -6  419.57    9.23
   4  -4  -6  414.84    8.92
   4   4  -6  412.68    9.51
   6  -4  -8    4.47    2.30
   6   4  -8    9.25    2.73
   6  -4  -8    9.15    2.69
   8   4 -10    3.81    2.47
   8  -4 -10   -2.17    2.95
   8   4 -10   -1.57    2.78
   8  -4 -10   -1.46    2.42
  10  -4 -12   64.23    5.76
  10   4 -12   60.48    5.80
  10   4 -12   58.51    5.12
  10  -4 -12   62.24    5.07
  12   4 -14   35.66    4.67
  12   4 -14   38.10    4.25
  12  -4 -14   39.29    4.80
  12  -4 -14   37.18    4.16
  14   4 -16  112.46    7.83
  14  -4 -16  116.75    6.94
  14  -4 -16  112.36    7.78
  14   4 -16  108.73    6.67
  16  -4 -18   50.08    5.83
  16   4 -18   59.35    5.94
  18  -4 -20    7.38    5.62
  18   4 -20    7.18    5.19
  20   4 -22   10.42    5.83
  23  -5 -21   11.09    6.69
  21   5 -19   -2.61    4.89
  21  -5 -19   -2.28    5.62
  19  -5 -17   50.69    6.23
  19   5 -17   49.23    5.66
  19   5 -17   50.27    5.72
  17  -5 -15   19.63    5.11
  17   5 -15   22.54    4.56
  17   5 -15   24.65    4.76
  15   5 -13   90.92    7.02
  15  -5 -13   96.44    7.51
  15   5 -13  102.03    6.91
  13  -5 -11  448.12   11.74
  13   5 -11  436.06   11.47
  13   5 -11  441.47   11.24
  11  -5  -9   57.40    4.45
  11   5  -9   51.87    4.99
  11  -5  -9   47.73    3.92
   9  -5  -7  162.72    6.43
   9  -5  -7  165.49    4.81
   9   5  -7  173.07    6.18
   7  -5  -5   38.60    3.28
   7   5  -5   40.30    3.00
   7  -5  -5   38.34    2.57
   5  -5  -3  113.55    4.72
   5   5  -3  120.61    4.62
   3  -5  -1  227.24    6.26
   3  -5  -1  232.19    7.66
   3   5  -1  250.13    6.35
  -3   5   1  254.90    5.43
   1   5   1  194.14    5.49
  -1   5  -1  183.04    4.93
   1  -5   1  182.23    5.16
  -1  -5  -1  183.83    5.60
   1  -5   1  177.22    6.74
   1   5  -3   74.31    3.88
   1  -5  -3   75.80    3.35
  -1  -5   3   66.63    5.86
   1  -5  -3   69.09    4.14
  -1  -5   3   76.01    3.56
   1  -5  -3   77.68    3.58
   3  -5  -5  864.92   16.84
   3   5  -5  886.58   17.10
   3  -5  -5  857.88   16.48
   5  -5  -7  457.27    9.87
   5   5  -7  453.95   10.66
   5  -5  -7  458.26   10.36
   7  -5  -9   40.23    3.09
   7   5  -9   41.54    3.73
   7  -5  -9   40.26    3.65
   9   5 -11    0.31    2.71
   9   5 -11   -0.17    3.18
   9  -5 -11    2.97    3.35
   9  -5 -11    0.97    2.76
  11  -5 -13  812.34   17.16
  11  -5 -13  803.43   17.50
  11   5 -13  795.34   16.56
  13   5 -15   75.91    6.46
  13  -5 -15   82.54    7.45
  13   5 -15   81.65    7.40
  13  -5 -15   81.90    6.40
  15  -5 -17    5.80    4.95
  15   5 -17    5.03    4.68
  17  -5 -19   57.72    6.57
  17   5 -19   50.36    6.22
  19  -5 -21    6.85    6.14
  19   5 -21   -3.87    5.29
  21   5 -23   91.92    8.27
  24  -6 -22   86.99    8.91
  22   6 -20    4.51    5.47
  22  -6 -20    4.26    6.39
  20  -6 -18    7.54    5.97
  20   6 -18    8.55    5.06
  18   6 -16   30.81    5.18
  18   6 -16   22.63    4.94
  18  -6 -16   23.97    5.65
  16  -6 -14   10.09    5.15
  16   6 -14    5.78    4.15
  16   6 -14   15.34    4.39
  14  -6 -12   71.95    5.97
  14   6 -12   73.94    6.42
  14   6 -12   73.81    6.35
  12   6 -10  187.01    7.38
  12  -6 -10  192.05    7.94
  10  -6  -8  130.06    6.46
  10  -6  -8  129.21    4.43
  10   6  -8  125.86    5.76
   8  -6  -6  134.11    5.88
   8  -6  -6  134.57    3.95
   8   6  -6  133.75    5.60
   6   6  -4  841.78   16.58
   6  -6  -4  809.44   16.36
   6  -6  -4  817.98   15.18
   4   6  -2    9.87    2.32
  -4   6   2   14.67    1.62
   4  -6  -2   10.48    2.49
  -2  -6   0   87.83    4.34
  -2   6   0   83.13    3.65
   2  -6   0   76.80    5.56
   2   6   0   87.08    4.16
   2  -6   0   86.86    4.26
   0  -6  -2   63.68    3.90
   0  -6   2   58.06    6.02
   0  -6   2   65.29    3.75
   0   6  -2   65.57    3.72
   0  -6  -2   61.16    4.07
   0   6   2   63.35    4.17
   2  -6  -4   40.16    3.41
   2  -6  -4   36.03    3.38
   2   6  -4   41.71    2.86
   2  -6  -4   43.41    3.03
  -2  -6   4   37.07    4.14
   4  -6  -6  343.34    8.75
   4  -6  -6  343.38    7.88
   4   6  -6  350.23    8.79
   6  -6  -8  141.41    5.07
   6   6  -8  134.82    6.14
   6  -6  -8  140.11    6.17
   8   6 -10   22.10    3.68
   8  -6 -10   22.29    2.99
   8  -6 -10   21.27    3.68
  10   6 -12   10.65    3.24
  10   6 -12    8.65    3.76
  10  -6 -12    9.66    4.12
  10  -6 -12    8.59    3.25
  12   6 -14   77.31    6.04
  12   6 -14   77.28    7.27
  12  -6 -14   71.48    6.20
  12  -6 -14   70.96    5.83
  14  -6 -16  138.60    8.30
  14   6 -16  133.30    8.37
  16   6 -18   87.36    8.07
  16  -6 -18   89.93    8.14
  18   6 -20   13.58    5.65
  18  -6 -20   25.44    6.30
  20   6 -22   99.36    9.36
  20  -6 -22   89.76    8.45
  22   6 -24   40.40    7.56
  23  -7 -21   21.80    7.37
  23   7 -21   21.88    6.37
  21  -7 -19    6.33    6.18
  21   7 -19   11.38    5.59
  19  -7 -17    1.08    5.67
  19   7 -17    3.43    4.94
  17  -7 -15    2.66    5.14
  17   7 -15    1.39    4.31
  17   7 -15    1.73    4.30
  15  -7 -13   -1.90    4.98
  15   7 -13    0.97    4.18
  15   7 -13    0.88    4.14
  13  -7 -11   10.89    4.67
  13   7 -11    9.20    3.86
  11  -7  -9  204.54    8.05
  11   7  -9  212.37    7.67
   9  -7  -7  719.55   15.60
   9  -7  -7  714.11   13.74
   9   7  -7  728.39   15.44
   7   7  -5  810.85   16.44
   7  -7  -5  804.47   14.95
   7  -7  -5  784.75   16.40
   5  -7  -3  817.98   16.42
  -5   7   3  814.82   15.33
   5   7  -3  833.10   16.60
   3  -7  -1  884.13   20.35
   3  -7  -1  903.26   17.91
  -3   7   1  983.46   17.48
   3   7  -1  943.27   18.11
   1  -7   1  334.82    7.82
  -1  -7  -1  338.25    8.09
   1  -7   1  319.62    9.86
   1   7   1  325.83    7.79
  -1   7  -1  350.50    7.69
  -1  -7   3  273.91    6.77
   1   7  -3  269.79    6.96
  -1   7   3  267.88    7.22
   1  -7  -3  282.92    7.27
  -1  -7   3  268.69    9.69
   1  -7  -3  276.93    7.24
   3  -7  -5    9.64    2.34
   3  -7  -5   10.56    2.22
   3   7  -5    8.42    2.57
   3  -7  -5   10.50    2.96
  -3  -7   5   15.08    4.41
   5   7  -7   -1.73    2.75
   5  -7  -7    2.85    2.30
   5  -7  -7   -1.67    3.03
   7  -7  -9   26.30    3.82
   7   7  -9   19.46    3.48
   7  -7  -9   19.24    2.84
   9  -7 -11    3.14    2.93
   9  -7 -11   -1.76    3.84
   9   7 -11    3.51    3.63
  11  -7 -13   32.50    5.13
  11  -7 -13   32.90    3.97
  11   7 -13   34.06    4.83
  11   7 -13   29.94    3.88
  13   7 -15   42.41    5.54
  13  -7 -15   44.01    5.90
  15   7 -17  153.95    9.04
  15  -7 -17  157.01    9.09
  17  -7 -19   48.64    6.83
  17   7 -19   48.63    6.45
  19  -7 -21   35.89    7.01
  19   7 -21   31.22    6.50
  21  -7 -23    7.08    7.53
  21   7 -23    9.90    6.49
  22   8 -20  115.36    9.43
  22  -8 -20  112.34   10.17
  20   8 -18   10.42    5.43
  20  -8 -18   22.60    6.46
  18  -8 -16    7.96    5.88
  18   8 -16   13.28    5.05
  18   8 -16    3.91    4.49
  16   8 -14   96.64    6.80
  16  -8 -14   96.79    8.07
  16   8 -14   92.90    7.41
  14   8 -12  577.19   14.90
  14  -8 -12  624.01   15.39
  12  -8 -10   38.86    5.22
  12   8 -10   49.81    4.67
  10  -8  -8    8.87    3.91
  10   8  -8    3.39    3.23
   8  -8  -6    0.56    1.81
   8   8  -6   -0.77    2.68
   8  -8  -6    0.32    3.35
  -6   8   4    2.66    1.80
   6  -8  -4   -2.07    3.05
   6   8  -4    1.48    2.74
   4  -8  -2  533.61   13.58
  -4   8   2  546.53   10.77
   4  -8  -2  535.12   11.89
   4   8  -2  520.28   11.71
  -2  -8   0   34.04    3.26
  -2   8   0   32.79    2.70
   2  -8   0   36.32    3.21
   2  -8   0   37.20    4.04
   2   8   0   30.87    2.97
   0  -8   2 1599.36   29.01
   0  -8  -2 1586.03   29.36
   0  -8   2 1541.86   33.39
   0   8  -2 1598.62   29.26
   0   8   2 1566.88   29.26
   0  -8  -2 1591.04   32.27
  -2  -8   4   28.48    2.93
   2  -8  -4   23.98    3.40
   2   8  -4   21.81    2.91
  -2  -8   4   24.27    4.80
   2  -8  -4   24.24    2.73
   4   8  -6   21.36    3.24
   4  -8  -6   20.71    3.55
   4  -8  -6   22.38    2.81
   4  -8  -6   18.63    2.59
   6   8  -8   60.48    4.35
   6  -8  -8   62.22    5.71
   6  -8  -8   60.49    4.47
   8  -8 -10  500.25   11.26
   8  -8 -10  506.42   12.57
   8   8 -10  499.32   12.70
  10  -8 -12   54.88    5.58
  10  -8 -12   55.77    5.28
  10   8 -12   55.90    5.28
  12   8 -14    5.62    4.54
  12  -8 -14    5.69    5.17
  14   8 -16    0.00    4.68
  14  -8 -16    2.89    5.36
  16   8 -18    0.61    5.30
  16  -8 -18   11.38    5.88
  18   8 -20   39.70    6.65
  18  -8 -20   34.84    7.02
  20   8 -22   -1.98    5.96
  20  -8 -22   14.83    7.49
  23   9 -21    6.54    6.21
  21  -9 -19   30.33    7.17
  21   9 -19   43.56    6.61
  19  -9 -17   14.21    6.23
  19   9 -17   21.07    5.60
  17  -9 -15    8.09    5.66
  17   9 -15    6.26    4.86
  17   9 -15    2.99    4.51
  15  -9 -13   -2.21    4.94
  15   9 -13    1.68    4.42
  13   9 -11    5.63    4.19
  13  -9 -11    4.05    5.17
  11   9  -9  319.56    9.93
  11  -9  -9  333.89   10.57
   9   9  -7   91.70    5.81
   9  -9  -7   92.56    6.60
   7   9  -5   42.79    3.80
   7  -9  -5   39.68    4.24
  -7   9   5   39.89    2.53
   5   9  -3 1024.24   20.19
  -5   9   3 1005.80   18.93
   5  -9  -3 1000.30   22.55
   5  -9  -3 1013.94   20.14
   3   9  -1   13.61    2.90
   3  -9  -1   12.52    3.55
  -3   9   1   11.08    2.49
   3  -9  -1   11.50    3.21
   1   9   1   23.18    2.87
  -1   9  -1   21.99    2.80
  -1  -9  -1   21.86    3.34
   1  -9   1   24.82    3.79
   1  -9   1   23.71    3.14
  -1  -9   3   16.32    4.46
  -1  -9   3   23.71    2.99
   1   9  -3   18.32    2.79
   1  -9  -3   16.28    3.11
   1  -9  -3   16.36    3.41
  -1   9   3   16.42    2.81
   3   9  -5  118.39    5.66
   3  -9  -5  128.75    5.36
  -3  -9   5  113.46    8.67
   3  -9  -5  125.65    6.04
   5   9  -7   82.14    5.69
   5  -9  -7   85.18    5.28
   5  -9  -7   88.93    4.81
   5  -9  -7   78.55    6.25
   7  -9  -9    3.46    4.13
   7  -9  -9    5.84    2.91
   7   9  -9    1.84    3.54
   9  -9 -11    6.44    3.31
   9  -9 -11    9.58    4.66
   9   9 -11   13.66    4.23
  11  -9 -13  272.97   10.47
  11   9 -13  257.21   10.16
  13   9 -15    6.73    4.87
  13  -9 -15   -2.77    5.35
  15  -9 -17    4.99    5.87
  15   9 -17    7.03    5.35
  17   9 -19   13.30    5.92
  17  -9 -19   -2.12    6.16
  19   9 -21   -3.38    5.89
  19  -9 -21    8.45    7.10
  21  -9 -23   54.06    9.03
  22 -10 -20   41.79    8.16
  22  10 -20   53.31    7.34
  20  10 -18    5.72    5.49
  20 -10 -18   -1.82    6.39
  18  10 -16  418.42   13.44
  16 -10 -14  298.79   11.17
  16  10 -14  281.91   10.63
  14 -10 -12  201.99    9.59
  14  10 -12  210.72    8.87
  12  10 -10  220.50    8.95
  12 -10 -10  237.44    9.73
  10 -10  -8  186.84    8.44
  10  10  -8  175.41    7.63
   8 -10  -6  910.16   19.07
   8  10  -6  864.45   18.55
   6  10  -4  735.68   15.80
   6 -10  -4  738.33   15.95
   6 -10  -4  744.74   17.80
  -6  10   4  720.07   14.28
   4  10  -2 1058.83   21.31
   4 -10  -2 1069.42   21.33
   4 -10  -2 1083.71   23.99
  -4  10   2 1084.71   20.41
  -2  10   0  351.34    8.59
   2 -10   0  350.74   11.32
   2 -10   0  365.60    9.28
   2  10   0  349.48    8.98
  -2 -10   0  362.04    9.29
   0 -10  -2  637.76   13.98
   0  10   2  639.62   13.48
   0 -10  -2  653.32   15.26
   0 -10   2  649.70   13.63
   0  10  -2  636.96   13.44
   0 -10   2  645.80   16.79
  -2 -10   4 1354.84   30.84
   2  10  -4 1333.83   26.41
   2 -10  -4 1404.69   28.75
  -2 -10   4 1417.45   26.03
  -2  10   4 1389.16   26.23
   2 -10  -4 1401.49   26.64
   4 -10  -6  439.42   11.28
   4  10  -6  420.98   10.83
   4 -10  -6  439.73   10.82
   6 -10  -8  399.15    9.64
   6  10  -8  387.32   10.64
   6 -10  -8  418.64   11.29
   8 -10 -10  199.95    6.90
   8  10 -10  172.96    8.14
   8 -10 -10  190.77    8.89
  10  10 -12    9.60    4.69
  10 -10 -12   12.94    5.47
  12 -10 -14   13.55    5.58
  12  10 -14   13.72    5.00
  14 -10 -16   30.50    6.45
  14  10 -16   26.83    5.77
  16  10 -18   -0.95    5.50
  16 -10 -18   -1.14    6.35
  18 -10 -20   -3.12    6.90
  18  10 -20   -0.52    5.96
  20 -10 -22   -1.57    7.79
  20  10 -22    4.29    6.42
  21  11 -19   20.82    6.46
  21 -11 -19   25.38    7.78
  19 -11 -17    6.57    6.71
  19  11 -17    6.95    5.69
  17  11 -15   69.09    6.67
  17 -11 -15   71.19    7.46
  15 -11 -13   63.96    6.86
  15  11 -13   76.22    6.88
  13 -11 -11   56.14    6.36
  13  11 -11   57.00    5.53
  11  11  -9   44.50    5.07
  11 -11  -9   47.46    6.07
   9  11  -7   13.08    4.02
   9 -11  -7   14.98    4.87
   7 -11  -5  242.93    8.96
   7 -11  -5  237.10    9.11
   7  11  -5  242.14    8.19
   5 -11  -3  238.31    9.26
   5 -11  -3  229.86    8.28
  -5  11   3  220.38    6.35
   5  11  -3  227.29    7.71
   3 -11  -1  251.14    9.45
  -3  11   1  244.20    7.05
   3  11  -1  258.14    7.90
   3 -11  -1  259.96    8.21
  -3 -11   1  262.87    8.30
  -1  11  -1  602.73   13.05
  -1 -11  -1  613.89   13.75
   1 -11   1  610.80   13.44
   1  11   1  606.44   13.26
   1 -11   1  623.08   16.59
  -1  11   3    0.11    2.89
  -1 -11   3    0.79    3.40
   1 -11  -3   -2.60    3.63
   1 -11  -3   -2.27    3.19
  -1 -11   3   -5.22    4.12
   1  11  -3   -0.12    2.91
  -3  11   5   97.10    5.50
   3 -11  -5   88.59    6.41
   3  11  -5   88.90    5.63
   5 -11  -7   29.88    4.84
   5  11  -7   17.94    3.89
   7 -11  -9   33.27    5.40
   7  11  -9   26.74    4.48
   7 -11  -9   27.96    3.67
   9  11 -11   -0.78    4.58
   9 -11 -11    0.38    5.49
  11  11 -13    5.06    4.86
  11 -11 -13    2.87    5.66
  13 -11 -15  145.44    9.35
  13  11 -15  130.54    8.47
  15  11 -17   98.58    8.81
  15 -11 -17   96.94    9.21
  17 -11 -19   94.24    8.61
  17  11 -19   96.72    8.24
  19 -11 -21    1.59    7.94
  19  11 -21    4.43    6.59
  20 -12 -18   73.30    8.71
  20  12 -18   73.91    7.70
  18  12 -16    3.60    5.71
  18 -12 -16    9.80    6.73
  16 -12 -14    1.14    6.17
  16  12 -14    8.82    5.36
  14 -12 -12   -3.33    5.59
  14  12 -12    5.71    4.73
  12 -12 -10    7.44    5.40
  12  12 -10    3.53    4.30
  10  12  -8   45.13    5.17
  10 -12  -8   53.47    6.23
   8  12  -6   82.17    6.41
   8 -12  -6  100.91    7.66
   8 -12  -6   90.96    7.74
   6  12  -4  129.00    6.77
  -6  12   4  118.41    5.13
   6 -12  -4  109.36    7.49
   6 -12  -4  123.11    7.91
   4 -12  -2  187.57    9.22
  -4  12   2  197.11    6.50
   4 -12  -2  205.62    8.05
   4  12  -2  191.76    7.39
   2  12   0   -0.14    3.32
  -2  12   0    0.22    2.97
  -2 -12   0    2.66    3.98
   2 -12   0   -4.34    3.84
   2 -12   0    1.55    4.29
   0 -12   2    1.92    4.84
   0 -12   2    8.02    3.87
   0  12  -2    8.11    3.22
   0  12   2    5.59    3.25
   0 -12  -2    3.11    4.08
   0 -12  -2    7.38    4.17
  -2 -12   4    5.28    5.64
   2  12  -4    1.74    3.34
  -2  12   4    1.86    3.15
  -2 -12   4    3.44    3.76
   2 -12  -4    4.03    4.31
   4  12  -6  702.32   15.94
   4 -12  -6  735.85   16.47
  -4  12   6  711.52   15.26
   6  12  -8  462.27   12.42
   6 -12  -8  466.54   12.84
   8 -12 -10    2.82    5.52
   8  12 -10    2.61    4.55
  10  12 -12    0.94    4.78
  10 -12 -12    6.77    5.64
  12  12 -14   -0.93    5.21
  12 -12 -14   -1.08    5.85
  14  12 -16   45.97    6.71
  14 -12 -16   51.44    7.42
  16 -12 -18   16.61    7.25
  16  12 -18   14.41    6.28
  18 -12 -20   23.17    8.33
  18  12 -20   22.94    6.93
  19  13 -17   30.96    6.56
  19 -13 -17   16.34    7.50
  17  13 -15   24.07    5.96
  17 -13 -15   16.83    7.05
  15 -13 -13   55.52    7.25
  15  13 -13   63.35    6.41
  13  13 -11    7.40    4.76
  13 -13 -11   -6.58    5.55
  11  13  -9   13.42    4.68
  11 -13  -9   11.15    5.69
   9  13  -7  102.34    7.12
   9 -13  -7  119.77    8.38
   7  13  -5   -2.91    4.04
   7 -13  -5    1.71    5.07
   5 -13  -3   91.17    7.45
   5  13  -3   84.43    6.46
  -5  13   3   94.52    5.36
   5 -13  -3  110.34    8.20
   3  13  -1  648.34   15.02
   3 -13  -1  687.98   15.48
   3 -13  -1  706.52   18.17
  -3  13   1  653.17   14.24
  -1 -13  -1   52.56    5.26
   1 -13   1   51.82    6.09
   1 -13   1   51.14    5.07
   1  13   1   50.23    4.40
  -1  13  -1   54.19    4.20
  -1  13   3    7.03    3.59
   1  13  -3    5.39    3.52
  -1 -13   3    6.20    4.22
  -1 -13   3   10.58    5.88
   1 -13  -3    6.41    4.58
  -3  13   5    4.94    3.55
   3 -13  -5    0.43    4.84
   3  13  -5   -1.66    3.88
   5  13  -7   10.08    4.30
  -5  13   7   15.76    4.05
   5 -13  -7   15.16    5.40
   7  13  -9   94.92    7.28
   7 -13  -9  102.91    8.12
   9  13 -11   15.33    5.10
   9 -13 -11   16.43    5.85
  11 -13 -13   -3.43    6.05
  11  13 -13   -1.57    5.05
  13 -13 -15   -7.49    6.29
  13  13 -15   -1.28    5.66
  15 -13 -17   29.73    7.38
  15  13 -17   18.40    6.32
  17 -13 -19   71.14    8.88
  17  13 -19   86.61    8.44
  18  14 -16   15.31    6.41
  18 -14 -16    8.84    7.38
  16  14 -14    9.04    5.68
  16 -14 -14    0.99    6.67
  14 -14 -12   15.19    6.67
  14  14 -12   28.96    5.70
  12  14 -10    6.82    4.89
  12 -14 -10    5.64    5.95
  10  14  -8  288.68    9.91
  10 -14  -8  281.47   10.79
   8 -14  -6   11.17    5.63
   8  14  -6   18.85    4.52
   6 -14  -4   17.14    5.69
   6  14  -4   14.31    4.60
   4  14  -2   84.18    6.63
  -4  14   2   74.47    5.48
   4 -14  -2   93.62    8.75
   4 -14  -2   82.10    7.21
  -2  14   0  565.30   13.28
  -2 -14   0  599.81   14.61
   2 -14   0  621.36   17.59
   2 -14   0  614.12   14.57
   2  14   0  597.39   14.10
   0  14   2  245.20    8.49
   0 -14  -2  245.05    9.30
   0 -14   2  254.55    9.06
   0 -14   2  262.67   11.86
   0  14  -2  221.19    7.85
   2  14  -4   15.06    4.20
  -2 -14   4   13.35    4.95
  -2  14   4    9.31    3.92
  -2 -14   4   17.23    7.47
   2 -14  -4   14.89    5.38
   4 -14  -6    6.59    5.34
  -4  14   6    5.07    3.87
   4  14  -6   -3.54    4.09
   6  14  -8   58.62    5.50
   6 -14  -8   62.63    6.55
   8 -14 -10  323.51   11.51
   8  14 -10  311.79   10.83
  10  14 -12   14.89    5.41
  10 -14 -12   12.82    6.23
  12 -14 -14  120.38    9.39
  12  14 -14  140.07    9.24
  14  14 -16   15.08    6.28
  14 -14 -16    8.73    7.04
  16  14 -18   23.46    6.80
  16 -14 -18    9.10    7.92
  17 -15 -15    4.78    7.51
  17  15 -15   13.95    6.33
  15 -15 -13   -5.72    6.61
  15  15 -13    7.89    5.58
  13 -15 -11   36.81    7.06
  13  15 -11   41.73    5.93
  11  15  -9    6.82    4.87
  11 -15  -9    6.48    6.22
   9 -15  -7  146.54    9.14
   9  15  -7  154.66    7.87
   7  15  -5   59.31    5.30
   7 -15  -5   58.28    6.55
   5 -15  -3   22.71    5.81
   5  15  -3   24.26    4.89
  -3  15   1  107.55    6.11
   3 -15  -1  111.20    7.86
   3  15  -1  104.66    7.18
  -1 -15  -1    9.19    5.38
   1 -15   1   14.39    5.35
  -1  15  -1    5.37    3.82
   1 -15   1   13.08    6.62
   1  15   1   12.67    4.53
  -1 -15   3   11.03    7.13
  -1  15   3    8.74    4.17
   1 -15  -3    4.77    5.44
  -1 -15   3   16.38    5.13
   1  15  -3   10.39    4.08
   3 -15  -5   56.77    6.38
   3  15  -5   54.23    5.11
  -3  15   5   53.59    4.70
   5 -15  -7   12.94    5.60
   5  15  -7    7.98    4.43
   7 -15  -9   40.15    6.43
   7  15  -9   37.76    5.44
   9 -15 -11   96.21    8.71
   9  15 -11  108.95    8.11
  11 -15 -13   78.54    7.94
  11  15 -13   92.45    8.36
  13  15 -15   68.03    7.60
  13 -15 -15   49.41    7.96
  15  15 -17    3.62    6.40
  15 -15 -17    3.44    7.63
  16  16 -14   34.78    6.77
  16 -16 -14   24.59    7.90
  14 -16 -12   38.46    7.70
  14  16 -12   43.77    6.37
  12  16 -10  301.09   11.04
  12 -16 -10  302.36   12.07
  10 -16  -8   43.62    6.95
  10  16  -8   56.59    5.98
   8  16  -6  245.65    9.14
   8 -16  -6  224.53   10.14
   6 -16  -4  466.37   13.53
   6  16  -4  471.75   12.49
   4 -16  -2   14.39    5.75
   4  16  -2   24.27    4.74
   2 -16   0    8.37    5.26
   2  16   0    4.13    4.33
  -2 -16   0    5.90    5.30
  -2  16   0   11.06    3.69
   0  16  -2   18.83    4.06
   0 -16   2   13.96    5.34
   0  16   2   15.76    4.34
   0 -16  -2   18.22    5.64
   0 -16   2   23.17    7.30
   2 -16  -4  244.91    9.90
   2  16  -4  239.26    8.38
  -2  16   4  246.07    8.44
   4  16  -6    7.47    4.55
   4 -16  -6    3.10    5.51
   6  16  -8  270.74    9.88
   6 -16  -8  260.88   10.57
   8  16 -10  136.40    8.40
   8 -16 -10  137.11    9.29
  10 -16 -12  265.66   11.71
  10  16 -12  283.63   11.09
  12 -16 -14  206.78   11.15
  12  16 -14  203.00   10.47
  14 -16 -16   -1.58    7.48
  14  16 -16    0.39    6.35
  15 -17 -13   11.76    7.74
  15  17 -13   19.41    6.34
  13  17 -11  134.97    8.67
  13 -17 -11  119.51   10.13
  11  17  -9   12.47    5.55
  11 -17  -9    8.13    6.70
   9  17  -7   12.99    5.09
   9 -17  -7   19.65    6.62
   7 -17  -5  341.41   11.94
   7  17  -5  324.93   10.68
   5  17  -3   63.08    5.58
   5 -17  -3   59.52    6.86
   3 -17  -1    0.14    5.55
   3  17  -1    0.60    4.43
  -1  17  -1  104.04    6.22
  -1 -17  -1  106.46    8.33
   1  17   1  114.54    7.04
   1 -17   1   98.96    7.69
   1 -17  -3   36.22    6.23
  -1 -17   3   42.80    5.93
  -1  17   3   51.11    5.08
   1  17  -3   42.19    4.62
   3 -17  -5   53.29    6.76
   3  17  -5   57.70    5.27
   5  17  -7   53.24    5.60
   5 -17  -7   46.90    6.81
   7  17  -9    7.98    5.11
   7 -17  -9    1.56    6.15
   9 -17 -11   60.57    7.89
   9  17 -11   78.89    6.98
  11  17 -13   11.29    6.09
  11 -17 -13    6.40    7.24
  13 -17 -15   18.14    7.97
  13  17 -15   12.18    6.75
  14 -18 -12   12.93    7.87
  14  18 -12   22.67    6.45
  12  18 -10  329.18   11.68
  12 -18 -10  287.47   12.76
  10  18  -8  104.30    7.85
  10 -18  -8   85.17    8.47
   8 -18  -6   99.98    8.88
   8  18  -6   99.86    7.43
   6 -18  -4  476.08   14.36
   6  18  -4  501.85   13.38
   4 -18  -2  339.21   11.76
   4  18  -2  338.11   10.59
   2  18   0  271.81    9.31
   2 -18   0  257.81   10.28
   0  18   2  344.23   10.34
   0  18  -2  331.82    9.91
   0 -18   2  329.90   11.34
   0 -18  -2  347.69   11.80
   2 -18  -4   39.61    6.69
   2  18  -4   42.24    5.08
   4  18  -6    7.89    4.69
   4 -18  -6    2.02    6.24
   6 -18  -8   -2.05    6.45
   6  18  -8    9.13    5.13
   8 -18 -10   23.11    7.14
   8  18 -10   46.28    6.10
  10 -18 -12    3.34    7.06
  10  18 -12    9.80    5.99
  12 -18 -14   56.43    8.84
  12  18 -14   78.54    8.04
  13  19 -11  149.83    9.36
  13 -19 -11  118.94   10.77
  11  19  -9   11.30    5.76
  11 -19  -9    3.62    7.49
   9  19  -7   16.33    5.33
   9 -19  -7    0.35    6.72
   7 -19  -5   52.45    7.51
   7  19  -5   64.78    6.09
   5  19  -3   56.51    5.59
   5 -19  -3   47.16    7.29
   3  19  -1  114.27    7.27
   3 -19  -1  102.40    8.65
  -1 -19  -1   45.26    6.84
   1 -19   1   41.25    6.73
   1  19   1   49.10    5.47
   1 -19  -3   15.28    6.63
   3 -19  -5   89.39    7.87
   3  19  -5  106.24    7.45
   5  19  -7   48.29    5.87
   5 -19  -7   33.70    7.20
   7 -19  -9   20.43    7.15
   7  19  -9   30.09    5.66
   9  19 -11   53.19    6.80
   9 -19 -11   46.27    8.06
  11 -19 -13   33.41    8.56
  11  19 -13   47.53    7.15
  12 -20 -10   23.25    8.68
  12  20 -10   52.80    6.97
  10 -20  -8   80.85    8.89
  10  20  -8   99.70    8.40
   8  20  -6  169.43    8.77
   8 -20  -6  147.47   10.47
   6  20  -4  235.50    9.25
   6 -20  -4  187.29   10.59
   4  20  -2   12.29    4.93
   4 -20  -2    5.11    6.52
   2  20   0   12.07    4.96
   2 -20   0    1.06    6.46
   0 -20   2   -7.28    5.96
   0 -20  -2    4.98    6.35
   2 -20  -4   16.63    6.97
   4 -20  -6   54.59    7.72
   4  20  -6   73.87    6.99
   6 -20  -8    5.82    7.13
   6  20  -8   20.27    5.45
   8 -20 -10   12.57    7.71
   8  20 -10   31.37    6.24
  10 -20 -12    3.56    8.06
  10  20 -12    7.64    6.28
   9  21  -7   30.42    6.20
   9 -21  -7   -5.56    7.74
   7 -21  -5  172.81   11.14
   7  21  -5  206.64    9.49
   5 -21  -3  256.63   12.06
   5  21  -3  302.19   10.30
   3  21  -1   34.80    5.32
   3 -21  -1   14.53    7.14
   1 -21   1   29.07    6.92
   1 -21  -3   -9.48    6.60
   3 -21  -5  114.58   10.06
   5  21  -7   27.39    5.67
   5 -21  -7    3.86    7.45
   7  21  -9   31.23    6.24
   7 -21  -9   16.74    8.06
   9  21 -11   37.36    7.03
   8  22  -6   57.70    6.63
   8 -22  -6   31.20    8.52
   6 -22  -4   36.07    8.30
   6  22  -4   58.99    6.36
   4  22  -2  165.93    8.51
   4 -22  -2  122.95   10.39
   2 -22   0   -6.15    6.92
   0 -22  -2   40.99    8.21
   2 -22  -4   22.81    7.98
   4 -22  -6   26.81    8.16
   6  22  -8   47.60    6.41
   5 -23  -3   39.10    8.59
   3 -23  -1   29.59    8.31
   1 -23  -3   33.52    8.45
  24   0 -21   -3.15    5.66
  22   0 -19   -4.21    5.09
  20   0 -17    3.49    4.91
  18   0 -15    1.95    4.47
  16   0 -13   -3.93    3.07
  16   0 -13   -0.08    4.26
  14   0 -11   -6.64    2.55
  14   0 -11    1.80    3.62
  12   0  -9    3.94    3.22
  12   0  -9   -1.27    2.23
  10   0  -7    0.54    2.74
  10   0  -7    0.69    1.94
   8   0  -5   -2.70    1.50
   8   0  -5    0.21    2.27
   6   0  -3   -6.87    1.50
   6   0  -3    0.24    2.43
   4   0  -1    0.73    1.13
  -2   0  -1   -9.16    0.92
   0   0   3   -4.07    1.78
   0   0  -3   -3.03    1.44
   0   0  -3   -3.03    0.81
   2   0  -5    2.21    2.47
   2   0  -5    0.34    1.68
   4   0  -7   -0.12    2.10
   4   0  -7   -0.26    1.74
   6   0  -9   -0.25    2.16
   6   0  -9   -3.06    2.38
   8   0 -11   -0.69    2.61
   8   0 -11   -1.11    2.69
  10   0 -13    3.36    3.12
  10   0 -13    0.02    3.11
  12   0 -15   -4.30    3.66
  12   0 -15    1.75    3.65
  14   0 -17    0.83    4.08
  14   0 -17   -0.38    4.24
  16   0 -19    0.72    4.43
  18   0 -21   -7.21    4.84
  25  -1 -22   -2.87    6.39
  23   1 -20    0.33    5.31
  23  -1 -20    2.16    5.62
  21   1 -18   90.65    7.79
  21  -1 -18   83.95    7.61
  19  -1 -16   10.53    4.91
  19   1 -16   18.39    4.96
  17  -1 -14   -2.86    4.37
  17   1 -14    1.53    3.51
  17   1 -14    6.32    4.39
  15   1 -12   75.50    5.62
  15  -1 -12   68.72    5.26
  15  -1 -12   63.91    5.22
  15   1 -12   67.23    6.29
  13  -1 -10  146.88    5.81
  13   1 -10  142.98    6.01
  13   1 -10  143.00    6.52
  13  -1 -10  153.16    6.93
  11  -1  -8   -2.30    2.84
  11   1  -8    2.31    2.11
  11  -1  -8   -1.32    1.93
  11   1  -8   -0.72    2.82
   9   1  -6  196.28    6.14
   9   1  -6  195.48    5.63
   9  -1  -6  201.18    5.46
   9  -1  -6  198.35    6.40
   7   1  -4  290.82    7.11
   7  -1  -4  286.15    7.28
   7   1  -4  304.39    6.72
   7  -1  -4  290.66    6.31
   5  -1  -2 2836.24   50.32
   5   1  -2 2727.04   51.05
   5  -1  -2 2784.37   49.30
   3  -1   0   39.57    2.43
  -3   1   0   43.80    1.67
  -1  -1  -2   90.16    2.84
   1  -1   2   92.41    4.26
  -1   1  -2   85.03    2.90
   1  -1  -4 2599.89   45.11
  -1  -1   4 2599.42   50.07
   1  -1  -4 2185.99   44.49
   1   1  -4 2690.94   45.27
   3  -1  -6  144.12    5.15
   3  -1  -6  141.17    4.33
   3   1  -6  143.22    3.97
   3   1  -6  140.82    5.18
   5   1  -8  633.48   13.45
   5  -1  -8  643.18   12.58
   5   1  -8  650.91   12.41
   5  -1  -8  634.21   13.32
   7   1 -10  208.01    7.03
   7  -1 -10  218.28    6.94
   7   1 -10  214.44    6.18
   7  -1 -10  211.47    6.30
   9   1 -12  215.11    6.59
   9  -1 -12  205.74    6.64
   9  -1 -12  197.44    7.15
   9   1 -12  206.24    7.41
  11   1 -14  239.93    8.56
  11  -1 -14  250.30    8.13
  11  -1 -14  249.66    8.61
  11   1 -14  260.97    7.91
  13   1 -16  270.94    9.62
  13  -1 -16  280.02    9.27
  13   1 -16  284.53    9.02
  13  -1 -16  274.17    9.73
  15  -1 -18  402.92   11.46
  15   1 -18  386.44   11.98
  15  -1 -18  388.85   11.84
  17  -1 -20   46.80    5.89
  17   1 -20   51.63    5.97
  19   1 -22   95.54    8.64
  24  -2 -21   38.10    6.72
  22   2 -19   18.07    5.36
  22  -2 -19   12.22    5.81
  20   2 -17   11.65    5.01
  20  -2 -17   10.71    5.10
  18   2 -15   17.97    4.81
  18   2 -15   10.52    3.99
  18  -2 -15   20.28    4.87
  16  -2 -13   96.39    7.32
  16   2 -13   98.64    7.12
  16   2 -13  106.54    6.68
  14   2 -11  441.91   11.08
  14  -2 -11  437.80   11.53
  14   2 -11  439.09   11.35
  14  -2 -11  450.12   10.54
  12  -2  -9  276.20    8.28
  12   2  -9  270.01    8.18
  12  -2  -9  279.42    7.29
  12   2  -9  280.10    7.82
  10  -2  -7  337.76    8.86
  10   2  -7  331.88    8.23
  10  -2  -7  336.89    7.67
  10   2  -7  328.63    8.54
   8  -2  -5  727.81   14.79
   8   2  -5  741.52   14.48
   8  -2  -5  744.46   14.00
   6   2  -3    8.15    1.96
   6  -2  -3    7.65    1.16
   6  -2  -3    8.13    2.48
   4  -2  -1    0.68    2.24
   4   2  -1    4.35    1.92
  -2  -2  -1  537.81   10.21
   2  -2   1  530.08   10.01
   0   2  -3  332.72    7.35
   0  -2   3  326.67    8.90
   0  -2  -3  342.87    7.00
   0  -2  -3  341.70    7.30
  -2  -2   5  285.15    9.01
   2   2  -5  263.75    6.96
   2  -2  -5  282.13    6.93
   2   2  -5  276.65    5.62
   2  -2  -5  270.33    6.47
   4  -2  -7    8.00    2.27
   4  -2  -7    9.22    2.07
   4   2  -7    9.35    2.40
   4   2  -7    9.41    1.71
   6   2  -9   -1.85    2.07
   6   2  -9    0.40    2.61
   6  -2  -9    1.68    2.41
   6  -2  -9    1.55    2.44
   8   2 -11   29.17    3.49
   8   2 -11   31.38    2.98
   8  -2 -11   31.84    3.34
   8  -2 -11   34.02    3.47
  10  -2 -13  802.75   17.14
  10   2 -13  783.06   17.44
  10   2 -13  789.13   16.17
  10  -2 -13  798.24   16.56
  12  -2 -15  116.00    6.99
  12   2 -15  122.60    7.17
  12   2 -15  118.27    6.53
  12  -2 -15  120.52    7.13
  14   2 -17   66.02    5.71
  14  -2 -17   70.15    5.64
  14  -2 -17   63.24    5.55
  14   2 -17   68.46    6.37
  16  -2 -19   -1.83    4.48
  16  -2 -19   -2.97    4.74
  16   2 -19    4.05    4.67
  18   2 -21   54.66    6.40
  20   2 -23   64.53    7.25
  25  -3 -22    0.61    6.59
  23  -3 -20   40.14    6.49
  21  -3 -18    8.74    5.43
  21   3 -18    4.81    5.01
  19   3 -16    7.20    4.71
  19  -3 -16    1.05    4.86
  19   3 -16    2.50    4.02
  17   3 -14  171.26    8.17
  17   3 -14  172.60    7.82
  17  -3 -14  176.85    8.38
  15   3 -12   67.87    5.92
  15   3 -12   71.17    5.28
  15  -3 -12   68.13    6.44
  13   3 -10    5.16    2.77
  13  -3 -10    0.39    2.29
  13  -3 -10    4.07    3.63
  13   3 -10    5.62    3.43
  11  -3  -8  425.45   10.49
  11   3  -8  425.47   10.02
  11  -3  -8  415.88    9.17
  11   3  -8  414.77    9.98
   9   3  -6  518.06   11.20
   9  -3  -6  520.91   10.34
   9  -3  -6  517.08   11.53
   7  -3  -4    5.57    2.47
   7   3  -4    8.23    2.10
   7  -3  -4    8.23    1.23
   5  -3  -2    4.19    2.38
   5   3  -2    4.97    2.07
   3   3   0 1493.99   26.68
   3  -3   0 1447.39   26.30
  -3   3   0 1433.48   26.88
  -1   3  -2   31.89    2.20
   1  -3   2   32.89    2.75
  -1  -3  -2   40.72    3.66
  -1  -3  -2   34.94    2.48
   1  -3   2   34.03    3.19
   1  -3  -4  939.18   17.70
   1   3  -4  929.25   17.88
   1  -3  -4  940.93   17.49
  -1  -3   4  931.71   20.55
   3  -3  -6    0.25    1.97
   3  -3  -6    0.45    2.04
   3   3  -6    1.20    2.19
   5   3  -8   10.12    1.94
   5  -3  -8    7.74    2.45
   5   3  -8   10.16    2.63
   5  -3  -8    7.12    2.34
   7   3 -10  354.33    9.55
   7  -3 -10  359.35    8.94
   7   3 -10  346.84    8.10
   7  -3 -10  349.11    8.70
   9  -3 -12   73.32    5.53
   9  -3 -12   73.34    5.46
   9   3 -12   75.12    5.95
   9   3 -12   72.10    4.73
  11   3 -14  178.08    7.88
  11   3 -14  172.64    6.87
  11  -3 -14  176.30    7.56
  11  -3 -14  176.47    7.50
  13  -3 -16  156.77    8.01
  13   3 -16  149.87    7.17
  13   3 -16  158.19    8.15
  13  -3 -16  153.68    7.88
  15  -3 -18   -1.36    4.20
  15  -3 -18    3.78    4.64
  15   3 -18    8.63    4.70
  17  -3 -20  224.63    9.83
  17   3 -20  215.49   10.01
  19   3 -22   23.06    5.98
  21   3 -24  115.46    9.70
  24  -4 -21    9.12    6.60
  22   4 -19    8.87    5.36
  22  -4 -19   -3.46    5.64
  20   4 -17   94.96    7.43
  20   4 -17   93.51    7.69
  20  -4 -17   92.35    7.91
  18   4 -15  230.05    9.27
  18  -4 -15  232.61    9.42
  18   4 -15  236.70    9.17
  16  -4 -13   65.50    5.88
  16   4 -13   66.24    5.50
  16   4 -13   55.28    4.93
  14   4 -11   74.40    6.23
  14   4 -11   72.38    5.83
  14  -4 -11   72.09    6.45
  12  -4  -9   27.87    2.61
  12   4  -9   31.34    3.73
  12   4  -9   30.13    3.28
  12  -4  -9   26.18    3.93
  10  -4  -7  412.44   10.22
  10  -4  -7  424.45    8.89
  10   4  -7  423.60    9.95
   8  -4  -5  680.81   14.13
   8   4  -5  692.95   13.95
   8  -4  -5  684.95   12.85
   6   4  -3  295.34    7.26
   6  -4  -3  289.93    7.26
   4   4  -1  838.18   15.91
   4  -4  -1  812.10   15.77
   2  -4   1   20.10    3.11
   2  -4   1   21.89    2.27
  -2   4  -1   17.46    1.81
   2   4   1   16.93    2.72
  -2  -4  -1   23.53    2.61
   0   4  -3  790.12   15.21
   0  -4  -3  792.45   15.14
   0  -4   3  790.26   17.96
   0  -4   3  809.46   14.60
   0  -4  -3  769.00   15.11
   2   4  -5  408.49    9.17
   2  -4  -5  414.26    8.91
   2  -4  -5  397.23    8.70
  -2  -4   5  404.11   11.44
   4   4  -7  655.40   13.62
   4  -4  -7  632.86   12.99
   4  -4  -7  639.44   13.02
   6   4  -9  538.28   10.79
   6  -4  -9  535.42   11.63
   6   4  -9  529.19   12.30
   6  -4  -9  534.68   11.67
   8  -4 -11    3.66    3.00
   8  -4 -11    4.84    2.84
   8   4 -11    7.68    2.58
   8   4 -11    5.12    3.03
  10  -4 -13    1.63    3.65
  10  -4 -13    0.59    3.23
  10   4 -13   -0.96    3.03
  10   4 -13    2.71    3.58
  12   4 -15    1.25    4.16
  12  -4 -15    2.73    4.35
  12   4 -15   -0.27    3.57
  12  -4 -15   -2.21    3.72
  14   4 -17  176.59    8.78
  14  -4 -17  177.13    8.48
  14  -4 -17  173.60    8.00
  16   4 -19   10.62    5.09
  16  -4 -19    8.63    5.41
  18   4 -21    7.06    5.34
  20   4 -23   12.94    6.21
  23  -5 -20   51.31    7.41
  21   5 -18   79.30    6.57
  21   5 -18   69.95    6.25
  21  -5 -18   66.09    6.89
  19  -5 -16   40.78    6.08
  19   5 -16   44.11    5.49
  19   5 -16   45.35    5.36
  17   5 -14    8.83    4.54
  17  -5 -14    8.84    4.92
  17   5 -14   11.14    4.05
  15   5 -12   74.33    6.44
  15   5 -12   78.04    5.47
  15  -5 -12   88.80    7.32
  13  -5 -10   15.88    4.20
  13   5 -10   10.61    3.29
  13   5 -10   16.34    3.72
  11   5  -8   10.01    2.91
  11  -5  -8   13.67    3.52
  11  -5  -8   11.26    2.05
   9  -5  -6   53.20    4.89
   9   5  -6   56.03    4.41
   9  -5  -6   59.27    2.90
   7   5  -4   10.83    2.47
   7  -5  -4    9.76    2.75
  -5   5   2   74.47    2.42
   5  -5  -2   73.31    4.16
   5   5  -2   75.16    4.18
  -3   5   0  131.99    3.64
   3  -5   0  129.88    4.59
   3   5   0  131.60    4.56
   3  -5   0  134.73    6.49
   1  -5   2  891.79   16.53
   1  -5   2  862.84   19.67
  -1   5  -2  912.79   16.82
  -1  -5  -2  900.08   16.96
   1  -5  -4   18.45    2.48
   1  -5  -4   14.63    2.12
  -1  -5   4   19.02    3.54
   1   5  -4   11.44    2.18
  -1  -5   4   16.56    1.86
  -3  -5   6  239.08    9.51
   3   5  -6  240.43    6.85
   3  -5  -6  226.49    6.05
   3  -5  -6  229.69    6.57
   5  -5  -8   76.47    5.11
   5   5  -8   80.71    5.39
   5  -5  -8   82.20    4.58
   7   5 -10  407.17   10.56
   7  -5 -10  399.67    9.69
   7  -5 -10  392.67    9.84
   9   5 -12  176.19    6.16
   9  -5 -12  175.99    6.81
   9  -5 -12  177.62    7.28
   9   5 -12  174.50    7.61
  11  -5 -14  395.57   11.14
  11   5 -14  397.68   10.03
  11  -5 -14  404.86   10.85
  11   5 -14  395.36   11.77
  13  -5 -16   42.55    4.85
  13  -5 -16   39.24    5.32
  13   5 -16   36.71    5.48
  15  -5 -18    2.77    4.94
  15   5 -18    4.27    4.74
  17   5 -20   33.71    6.04
  17  -5 -20   42.87    6.38
  19   5 -22   25.10    6.29
  21   5 -24   -6.89    6.01
  24  -6 -21    3.06    7.08
  22   6 -19    4.48    5.16
  22  -6 -19   -0.37    6.03
  20  -6 -17   -1.55    5.68
  20   6 -17    0.57    4.66
  20   6 -17    2.23    4.78
  18  -6 -15   60.12    6.24
  18   6 -15   63.38    5.61
  18   6 -15   64.19    5.63
  16   6 -13  112.65    7.11
  16   6 -13  103.07    7.18
  16  -6 -13  111.56    7.74
  14   6 -11   -3.81    3.43
  14   6 -11   -7.15    3.86
  14  -6 -11    2.24    4.52
  12  -6  -9  286.44    9.16
  12   6  -9  283.93    8.58
  10  -6  -7  391.21    7.98
  10   6  -7  384.90    9.63
  10  -6  -7  379.63   10.01
   8  -6  -5   98.61    3.08
   8  -6  -5   93.96    5.30
   8   6  -5  102.36    5.14
  -6   6   3  809.97   14.60
   6   6  -3  791.71   15.96
   6  -6  -3  777.77   15.82
   4   6  -1   60.39    3.88
   4  -6  -1   61.96    5.33
   4  -6  -1   62.00    4.24
  -4   6   1   69.41    2.95
  -2  -6  -1  585.70   12.04
  -2   6  -1  606.86   11.53
   2  -6   1  575.19   14.08
   2   6   1  578.40   11.96
   2  -6   1  593.53   11.74
   0  -6  -3  107.62    4.72
   0   6  -3  101.04    4.35
   0  -6   3   93.86    6.39
   0  -6   3  100.54    4.02
   0  -6  -3  105.81    4.39
   2   6  -5 1676.02   31.21
   2  -6  -5 1662.25   30.76
   2  -6  -5 1719.03   33.81
   2  -6  -5 1711.66   30.92
  -2  -6   5 1648.10   35.57
   4  -6  -7  226.43    6.95
   4   6  -7  221.30    7.16
   4  -6  -7  218.89    6.27
   6  -6  -9  120.78    5.21
   6   6  -9  115.79    6.13
   6  -6  -9  124.27    6.05
   8   6 -11  891.63   19.28
   8  -6 -11  909.38   18.27
   8  -6 -11  895.89   18.62
  10  -6 -13   43.00    4.85
  10  -6 -13   53.18    4.34
  10   6 -13   42.07    4.80
  10   6 -13   41.20    3.78
  12  -6 -15  229.11    8.90
  12   6 -15  251.03   10.01
  12  -6 -15  240.85    9.64
  14   6 -17   23.76    5.46
  14  -6 -17   25.00    5.60
  16  -6 -19   56.64    6.59
  16   6 -19   65.41    6.71
  18  -6 -21   17.86    6.36
  18   6 -21   16.11    5.88
  20   6 -23   28.94    6.85
  23  -7 -20  126.06   10.43
  23   7 -20  122.48    9.42
  21   7 -18    4.62    5.06
  21  -7 -18    4.86    6.09
  19  -7 -16  339.21   11.95
  19   7 -16  335.31   11.61
  19   7 -16  341.07   10.97
  17  -7 -14  468.03   13.31
  17   7 -14  463.13   13.05
  17   7 -14  464.41   12.47
  15   7 -12  225.71    8.59
  15  -7 -12  221.66    9.57
  15   7 -12  217.77    8.66
  13   7 -10 1163.00   24.01
  13  -7 -10 1195.93   24.22
  11   7  -8    4.40    3.15
  11  -7  -8    2.08    3.76
   9  -7  -6 1949.14   36.30
   9  -7  -6 1965.10   34.86
   9   7  -6 1934.96   36.38
   7   7  -4  368.81    9.22
   7  -7  -4  361.73    9.28
  -7   7   4  357.14    7.29
   5  -7  -2  707.05   17.23
   5   7  -2  723.33   15.04
   5  -7  -2  726.29   14.82
  -5   7   2  771.45   13.86
  -3   7   0  640.47   12.07
   3  -7   0  598.76   14.78
   3   7   0  619.60   12.75
   3  -7   0  604.90   12.58
   1  -7   2  617.37   15.65
  -1   7  -2  660.03   12.79
  -1  -7  -2  634.01   13.08
   1   7   2  624.97   13.09
   1  -7   2  648.30   12.66
  -1  -7   4 2706.82   46.72
   1  -7  -4 2630.43   47.28
   1   7  -4 2607.13   47.56
   1  -7  -4 2631.16   52.10
  -1  -7   4 2572.20   53.61
   1  -7  -4 2629.15   47.24
   3  -7  -6  249.59    6.70
   3   7  -6  257.66    7.55
   3  -7  -6  262.84    7.62
  -3  -7   6  246.80   10.32
   5  -7  -8   88.78    5.67
   5  -7  -8   76.67    4.49
   5   7  -8   70.37    5.46
   7  -7 -10  158.16    6.05
   7  -7 -10  176.43    7.19
   7   7 -10  163.52    7.22
   9  -7 -12   68.16    5.34
   9  -7 -12   71.97    5.49
   9   7 -12   67.38    6.13
  11  -7 -14   15.09    4.03
  11  -7 -14   21.20    5.27
  11   7 -14   14.06    4.67
  13  -7 -16   12.94    5.33
  13   7 -16   16.15    5.04
  15   7 -18    5.58    5.27
  15  -7 -18   13.02    5.69
  17  -7 -20   66.24    7.18
  17   7 -20   67.83    7.11
  19   7 -22    5.23    5.91
  19  -7 -22    2.83    6.85
  21   7 -24   -4.12    6.41
  24   8 -21   18.74    6.55
  22   8 -19  110.79    9.35
  22  -8 -19   89.52    8.40
  20   8 -17   18.48    5.37
  20  -8 -17   12.42    6.22
  18  -8 -15  191.64    9.72
  18   8 -15  177.86    8.41
  18   8 -15  197.12    9.24
  16   8 -13  370.73   10.78
  16  -8 -13  371.19   11.81
  16   8 -13  362.64   11.27
  14   8 -11    0.63    3.96
  14  -8 -11    2.29    5.10
  12  -8  -9  403.99   11.44
  12   8  -9  392.60   10.88
  10   8  -7  300.74    8.76
  10  -8  -7  311.14    9.31
   8   8  -5   94.51    5.43
  -8   8   5   88.99    3.43
   8  -8  -5   92.97    5.85
   6   8  -3  536.84   12.10
  -6   8   3  556.14   10.73
   6  -8  -3  549.21   12.23
   4   8  -1  718.97   15.01
  -4   8   1  770.38   14.23
   4  -8  -1  737.26   15.10
   4  -8  -1  720.32   17.50
  -2  -8  -1  520.63   11.45
  -2   8  -1  507.78   10.61
   2  -8   1  514.83   11.04
   2   8   1  505.92   11.14
   2  -8   1  511.70   13.71
   0   8  -3  184.47    5.90
   0   8   3  192.87    6.34
   0  -8  -3  198.03    6.60
   0  -8   3  180.36    8.33
   0  -8   3  195.43    5.85
   2  -8  -5 1359.89   25.39
  -2  -8   5 1318.17   29.98
   2  -8  -5 1373.80   25.81
   2  -8  -5 1376.37   27.41
   2   8  -5 1348.83   25.88
   4   8  -7  151.60    6.37
   4  -8  -7  152.85    5.57
   4  -8  -7  163.95    6.56
   6   8  -9   85.82    6.07
   6  -8  -9   84.00    5.11
   6  -8  -9   88.31    6.28
   8  -8 -11  597.81   14.26
   8  -8 -11  593.77   13.06
   8   8 -11  587.82   14.55
  10  -8 -13   10.10    4.92
  10   8 -13   11.42    4.50
  10  -8 -13   12.52    3.85
  12  -8 -15   16.41    5.43
  12   8 -15   23.05    5.13
  14   8 -17  218.60   10.21
  14  -8 -17  220.37   10.09
  16  -8 -19   22.49    6.58
  16   8 -19   26.10    6.18
  18   8 -21    5.53    5.99
  18  -8 -21   -0.79    6.60
  20   8 -23  220.68   11.94
  23   9 -20    6.65    6.02
  23  -9 -20   -1.75    7.07
  21   9 -18   35.58    6.15
  21  -9 -18   31.02    7.02
  19  -9 -16   -2.13    5.81
  19   9 -16    6.41    5.03
  17   9 -14   73.61    6.20
  17  -9 -14   69.14    6.76
  17   9 -14   71.89    5.79
  15   9 -12  126.53    7.44
  15  -9 -12  119.32    8.40
  13   9 -10  116.07    7.22
  13  -9 -10  129.67    8.16
  11   9  -8  315.63    9.57
  11  -9  -8  340.19   10.28
   9   9  -6  186.27    7.01
   9  -9  -6  194.12    7.70
  -7   9   4  262.23    6.08
   7   9  -4  257.66    8.01
   7  -9  -4  259.48    8.40
   5  -9  -2   86.30    5.58
   5  -9  -2   98.89    6.67
   5   9  -2   96.35    5.23
  -5   9   2  100.05    4.11
  -3  -9   0  113.90    5.67
   3  -9   0  111.97    5.56
  -3   9   0  105.46    4.64
   3  -9   0  116.68    7.21
   3   9   0  106.68    5.29
   1   9   2  180.36    6.07
   1  -9   2  173.00    8.58
  -1   9  -2  166.46    5.64
   1  -9   2  184.61    6.20
  -1  -9  -2  178.08    6.47
   1  -9  -4   66.11    4.58
   1  -9  -4   75.54    5.41
  -1   9   4   69.02    5.17
  -1  -9   4   67.09    4.63
  -1  -9   4   80.32    7.98
   1   9  -4   68.48    4.63
   3  -9  -6    6.63    2.30
   3  -9  -6    3.62    2.66
   3   9  -6    7.36    3.07
   3  -9  -6    4.48    3.48
  -3  -9   6   10.44    4.95
   5   9  -8   24.51    3.79
   5  -9  -8   26.49    3.22
   5  -9  -8   26.63    4.17
   7  -9 -10  204.56    6.97
   7  -9 -10  189.10    8.31
   7   9 -10  193.39    8.11
   9   9 -12  274.39   10.09
   9  -9 -12  277.70   10.02
   9  -9 -12  276.76    8.45
  11   9 -14   22.29    5.07
  11  -9 -14   15.51    5.62
  13  -9 -16   -1.26    5.45
  13   9 -16   -3.29    4.84
  15   9 -18   23.21    6.22
  15  -9 -18   32.83    6.66
  17   9 -20  172.65   10.47
  17  -9 -20  196.52   10.79
  19  -9 -22   35.34    7.99
  19   9 -22   31.02    7.11
  22  10 -19  149.97   10.20
  20 -10 -17    9.16    6.60
  20  10 -17   17.27    5.74
  18  10 -15    6.55    4.85
  18 -10 -15    7.55    5.98
  18  10 -15   11.97    5.21
  16 -10 -13  122.77    8.63
  16  10 -13  124.99    7.82
  14  10 -11  100.87    7.18
  14 -10 -11  107.08    8.03
  12 -10  -9    5.11    4.98
  12  10  -9    4.31    4.09
  10  10  -7  224.63    8.13
  10 -10  -7  262.89    9.21
   8  10  -5   29.91    3.97
   8 -10  -5   41.98    4.66
   6  10  -3   22.42    3.54
   6 -10  -3   19.34    4.06
  -6  10   3   21.47    2.43
   6 -10  -3   21.46    4.18
   4  10  -1  824.06   16.94
   4 -10  -1  821.17   19.49
   4 -10  -1  798.15   16.83
  -4  10   1  818.99   15.94
  -2  10  -1  134.53    5.13
   2 -10   1  148.10    6.11
   2 -10   1  149.54    8.17
   2  10   1  150.06    6.07
  -2 -10  -1  140.44    6.44
   0 -10   3   14.11    4.36
   0 -10   3   11.71    3.21
   0  10   3   14.23    3.09
   0  10  -3   11.40    2.76
   0 -10  -3    8.52    3.50
  -2  10   5  327.82    8.90
   2 -10  -5  325.45    9.21
   2 -10  -5  334.09    8.61
   2  10  -5  317.62    8.72
  -2 -10   5  303.07   11.65
   4 -10  -7  170.44    6.39
   4  10  -7  164.85    6.92
   4 -10  -7  174.17    7.44
   6 -10  -9  118.58    5.79
   6 -10  -9  128.78    7.50
   6  10  -9  124.90    7.01
   8 -10 -11  115.53    6.16
   8  10 -11  114.53    7.62
   8 -10 -11  126.89    7.98
  10 -10 -13  200.68    9.63
  10  10 -13  189.36    9.26
  12  10 -15   68.63    6.36
  12 -10 -15   53.61    6.53
  14  10 -17  303.06   11.95
  14 -10 -17  310.98   11.81
  16 -10 -19  168.34   10.34
  16  10 -19  151.04   10.08
  18 -10 -21  174.29   11.21
  18  10 -21  156.23   10.87
  21  11 -18   15.56    6.04
  21 -11 -18    5.86    6.93
  19 -11 -16   -1.56    6.23
  19  11 -16    3.76    5.46
  17 -11 -14    9.94    6.08
  17  11 -14   19.11    5.28
  15  11 -12   55.80    5.62
  15 -11 -12   47.86    6.39
  13  11 -10   58.73    5.39
  13 -11 -10   51.15    6.10
  11  11  -8   34.78    4.72
  11 -11  -8   30.43    5.64
   9 -11  -6    4.55    4.65
   9  11  -6    2.43    3.67
   7 -11  -4   75.05    7.34
   7  11  -4   67.65    5.96
   7 -11  -4   71.34    5.56
   5 -11  -2  136.97    7.81
   5 -11  -2  140.89    6.96
  -5  11   2  139.13    5.10
   5  11  -2  134.26    6.25
   3 -11   0    5.17    3.64
   3 -11   0    5.93    4.25
  -3 -11   0    3.26    3.79
   3  11   0    3.57    3.14
  -3  11   0    5.11    2.67
   1  11   2 1036.40   20.62
   1 -11   2 1067.95   24.72
  -1 -11  -2 1054.51   21.04
   1 -11   2 1064.83   20.58
  -1  11  -2  992.39   20.25
   1  11  -4   67.79    5.24
  -1  11   4   67.81    5.40
   1 -11  -4   72.89    6.15
  -1 -11   4   75.12    5.41
  -1 -11   4   75.16    6.59
   3 -11  -6   32.98    4.60
   3  11  -6   41.44    4.20
  -3  11   6   44.12    4.31
  -3 -11   6   43.56    7.01
   5  11  -8   48.83    4.76
   5 -11  -8   53.25    4.07
   5 -11  -8   57.71    5.51
   7 -11 -10   55.05    4.39
   7 -11 -10   54.54    5.96
   7  11 -10   53.65    5.44
   9 -11 -12  195.36    9.43
   9  11 -12  192.41    8.83
  11  11 -14   18.63    5.36
  11 -11 -14   15.81    5.88
  13 -11 -16    7.35    6.35
  13  11 -16   13.20    5.66
  15 -11 -18  106.27    9.67
  15  11 -18  105.91    9.25
  17 -11 -20  157.34   10.92
  17  11 -20  171.90   10.77
  19 -11 -22   14.04    8.53
  20  12 -17    8.56    5.95
  20 -12 -17    2.19    7.15
  18  12 -15   10.25    5.56
  18 -12 -15   -0.39    6.32
  16  12 -13  140.95    8.33
  14 -12 -11    2.72    5.45
  14  12 -11   16.12    4.88
  12 -12  -9    5.79    5.42
  12  12  -9    5.83    4.35
  10  12  -7   54.02    5.06
  10 -12  -7   66.89    6.32
  10 -12  -7   61.05    6.34
   8  12  -5    8.87    4.17
   8 -12  -5   21.16    4.82
   8 -12  -5   17.56    5.08
   6  12  -3  247.03    8.57
   6 -12  -3  259.45    9.03
   6 -12  -3  252.97   10.03
  -4  12   1  154.92    5.82
   4 -12  -1  158.70    8.71
   4  12  -1  153.78    6.97
   4 -12  -1  159.53    7.22
  -2 -12  -1   31.24    4.56
   2 -12   1   32.58    5.36
   2 -12   1   33.58    4.54
   2  12   1   31.37    3.85
  -2  12  -1   32.91    3.36
   0 -12  -3  253.99    8.86
   0 -12   3  244.23   11.09
   0  12   3  242.14    7.73
   0  12  -3  241.96    7.55
   0 -12   3  256.62    7.96
  -2  12   5    2.21    3.41
   2  12  -5   -0.31    3.43
  -2 -12   5    8.10    6.10
   2 -12  -5    7.10    4.34
  -4  12   7   96.16    6.45
   4  12  -7   96.79    6.51
   4 -12  -7   99.12    7.30
   6  12  -9  154.90    8.03
   6 -12  -9  178.27    7.09
   6 -12  -9  164.99    8.78
   8  12 -11  422.56   12.70
   8 -12 -11  441.87   13.06
  10  12 -13  282.46   10.87
  10 -12 -13  283.76   10.99
  12 -12 -15   12.73    6.29
  12  12 -15   14.17    5.79
  14 -12 -17   -5.91    6.49
  14  12 -17   -0.46    5.71
  16 -12 -19   -1.93    7.31
  16  12 -19   17.63    6.60
  18 -12 -21   52.56    8.97
  18  12 -21   40.62    7.76
  19  13 -16   98.65    8.89
  19 -13 -16   82.78    8.65
  17 -13 -14  151.73    9.77
  17  13 -14  144.55    8.84
  15  13 -12   91.74    7.50
  15 -13 -12   81.39    7.65
  13  13 -10   24.30    5.12
  13 -13 -10   35.28    6.31
  11 -13  -8   35.22    5.98
  11  13  -8   23.26    4.70
   9  13  -6  126.50    6.98
   9 -13  -6  131.00    8.50
   7 -13  -4  985.08   21.20
   7  13  -4  925.94   20.52
   7 -13  -4 1025.32   23.81
   5 -13  -2   36.88    5.55
   5  13  -2   33.78    4.57
   5 -13  -2   42.75    5.53
  -3 -13   0    0.45    4.62
  -3  13   0   -2.65    3.04
   3 -13   0   -0.64    5.27
   3  13   0    4.45    3.93
   3 -13   0   -3.63    4.41
  -1  13  -2   63.59    5.11
   1  13   2   71.68    6.01
   1 -13   2   74.05    6.88
   1 -13   2   73.51    6.35
  -1 -13  -2   68.08    5.61
   1 -13  -4  563.28   13.91
  -1 -13   4  567.43   13.04
  -1 -13   4  563.56   17.20
   1  13  -4  521.59   12.79
  -1  13   4  550.91   12.86
   3 -13  -6   81.96    7.51
   3  13  -6   69.14    6.15
  -3  13   6   74.49    6.11
  -5  13   8   46.27    4.97
   5  13  -8   42.47    5.23
   5 -13  -8   45.56    6.06
   7 -13 -10   20.75    5.87
   7  13 -10   20.48    5.10
   9 -13 -12    8.10    5.76
   9  13 -12    7.82    5.10
  11  13 -14  102.90    8.73
  11 -13 -14  101.28    8.89
  13  13 -16   89.17    7.88
  13 -13 -16   96.52    9.13
  15 -13 -18  316.83   13.05
  15  13 -18  312.94   12.85
  17  13 -20   49.64    7.91
  17 -13 -20   52.19    8.97
  20  14 -17    3.73    6.38
  18  14 -15    6.45    5.92
  18 -14 -15    6.56    7.26
  16 -14 -13    4.28    6.64
  16  14 -13   15.32    5.56
  14  14 -11   36.18    5.64
  14 -14 -11   21.32    6.54
  12  14  -9   12.84    4.81
  12 -14  -9   10.60    6.04
  10  14  -7    5.46    4.34
  10 -14  -7   -2.41    5.49
   8 -14  -5  103.87    8.31
   8  14  -5   95.82    6.89
   6  14  -3   37.41    5.04
   6 -14  -3   38.67    5.97
   6 -14  -3   32.30    6.31
   4 -14  -1   34.42    5.96
   4 -14  -1   31.50    5.43
   4  14  -1   29.21    4.73
   2  14   1   27.65    4.64
   2 -14   1   27.49    6.24
   2 -14   1   23.27    5.27
  -2 -14  -1   25.89    5.29
  -2  14  -1   22.01    3.77
   0 -14   3   77.82    7.61
   0 -14  -3   69.73    6.08
   0 -14   3   70.05    5.69
   0  14  -3   59.32    5.65
   0  14   3   69.52    6.06
  -2  14   5    1.71    3.98
   2 -14  -5    7.16    5.25
  -2 -14   5    6.50    6.82
   2  14  -5   -5.22    4.12
  -4  14   7    2.11    4.01
   4  14  -7    0.78    4.32
   4 -14  -7    4.73    5.47
   6 -14  -9  233.16    9.94
   6  14  -9  227.30    9.22
   8  14 -11   34.78    5.62
   8 -14 -11   26.81    6.23
  10  14 -13   11.43    5.65
  10 -14 -13    7.28    6.33
  12 -14 -15    3.99    6.67
  12  14 -15   11.22    6.09
  14 -14 -17  227.62   11.67
  14  14 -17  232.16   11.28
  16 -14 -19   58.96    8.96
  16  14 -19   67.77    8.20
  19  15 -16  109.57    9.33
  17 -15 -14  115.71   10.08
  17  15 -14  120.59    8.89
  15  15 -12  284.85   10.91
  15 -15 -12  281.39   12.05
  13  15 -10   10.34    5.21
  13 -15 -10   -3.14    6.23
  11  15  -8   13.77    4.90
  11 -15  -8    3.32    6.00
   9 -15  -6   89.67    8.12
   9  15  -6   87.75    6.80
   7 -15  -4   -3.16    5.42
   7  15  -4    0.68    4.42
   5  15  -2   12.10    4.59
   5 -15  -2   12.63    5.63
   3  15   0   41.69    5.19
   3 -15   0   38.50    5.66
  -3  15   0   29.31    3.85
   3 -15   0   36.63    6.58
  -1  15  -2   30.82    4.26
  -1 -15  -2   28.84    5.77
   1  15   2   33.52    4.74
   1 -15   2   40.28    5.47
   1 -15   2   34.10    7.51
   1 -15  -4   51.00    6.28
  -1 -15   4   58.29    8.28
   1  15  -4   55.70    4.79
  -1  15   4   57.92    5.03
  -1 -15   4   65.44    5.66
   3  15  -6  646.31   15.31
   3 -15  -6  636.31   16.09
  -3  15   6  641.80   14.58
   5  15  -8  688.99   16.42
   5 -15  -8  659.40   16.70
   7 -15 -10  217.27   10.08
   7  15 -10  235.77    9.55
   9  15 -12  262.21   10.83
   9 -15 -12  238.16   11.02
  11  15 -14   96.20    8.79
  11 -15 -14   88.68    8.31
  13  15 -16    4.22    6.38
  13 -15 -16    9.99    7.34
  15 -15 -18    5.24    8.03
  15  15 -18    2.64    6.65
  18  16 -15   23.41    6.83
  18 -16 -15   21.05    8.21
  16  16 -13   13.61    5.87
  16 -16 -13    2.60    7.23
  14  16 -11   21.78    5.87
  14 -16 -11    8.09    7.03
  12 -16  -9    6.80    6.69
  12  16  -9   13.15    5.23
  10 -16  -7   14.87    6.47
  10  16  -7   22.62    5.23
   8  16  -5   82.41    6.75
   8 -16  -5   83.30    7.27
   6  16  -3   10.93    4.72
   6 -16  -3    2.97    5.63
   4 -16  -1    0.25    5.40
   4  16  -1    5.46    4.58
   2 -16   1  125.49    7.91
   2 -16   1  124.48   10.57
  -2 -16  -1  117.36    8.21
  -2  16  -1  117.69    5.96
   2  16   1  122.11    7.16
   0  16   3    3.66    4.17
   0 -16   3    2.60    5.07
   0 -16   3    0.80    7.19
   0  16  -3    9.56    4.02
   0 -16  -3    6.42    5.49
  -2  16   5   39.74    4.73
   2  16  -5   38.11    4.90
   2 -16  -5   31.86    6.09
   4  16  -7    9.04    4.69
   4 -16  -7    7.74    5.80
   6 -16  -9   19.14    6.25
   6  16  -9   21.57    5.24
   8  16 -11  163.54    9.09
   8 -16 -11  150.20    9.65
  10  16 -13   13.03    5.98
  10 -16 -13    9.23    6.91
  12  16 -15   13.39    6.34
  12 -16 -15   -2.77    7.05
  14 -16 -17   44.74    8.74
  14  16 -17   49.08    7.74
  15 -17 -12   93.64    9.28
  15  17 -12  113.71    8.68
  13  17 -10   26.20    5.84
  13 -17 -10   15.96    7.20
  11  17  -8   11.73    5.35
  11 -17  -8   -3.41    6.55
   9  17  -6   32.34    5.45
   9 -17  -6   26.30    6.64
   7  17  -4    4.88    4.63
   7 -17  -4    0.65    6.10
   5 -17  -2   47.95    6.58
   5  17  -2   41.73    5.30
   3  17   0  272.10    9.44
   3 -17   0  272.53   10.16
  -1 -17  -2  264.55   10.41
   1 -17   2  281.55   10.16
   1  17   2  285.20    9.38
  -1  17   4   94.88    6.57
  -1 -17   4   88.34   10.51
   1  17  -4   96.44    6.62
   1 -17  -4   83.50    7.03
  -1 -17   4   92.57    7.55
   3 -17  -6   -0.39    5.86
   3  17  -6    4.03    4.32
   5 -17  -8    2.34    6.01
   5  17  -8    3.51    4.84
   7 -17 -10   66.51    7.53
   7  17 -10   75.67    6.70
   9 -17 -12   -8.88    6.64
   9  17 -12   17.13    6.02
  11  17 -14  152.40   10.00
  11 -17 -14  129.18   10.35
  13 -17 -16   85.89    9.47
  13  17 -16   80.70    8.54
  14  18 -11   42.94    6.76
  14 -18 -11   19.52    7.82
  12 -18  -9    6.75    7.09
  12  18  -9   14.32    5.69
  10 -18  -7    8.90    6.94
  10  18  -7   30.13    5.42
   8  18  -5  122.01    7.71
   8 -18  -5  110.51    9.27
   6 -18  -3  162.81    9.56
   6  18  -3  170.68    8.19
   4 -18  -1   26.50    6.34
   4  18  -1   42.35    5.53
  -2 -18  -1   -0.89    5.89
   2 -18   1   -1.38    5.71
   2  18   1    0.85    4.53
   0 -18   3   43.95    6.14
   0  18   3   40.55    5.33
   0 -18  -3   38.61    6.59
   2  18  -5   51.81    5.13
   2 -18  -5   56.12    6.99
   4 -18  -7   20.83    6.68
   4  18  -7   14.13    4.81
   6  18  -9   19.96    5.52
   6 -18  -9   10.00    6.66
   8  18 -11   26.96    6.04
   8 -18 -11   26.82    7.30
  10 -18 -13   30.77    7.71
  10  18 -13   39.54    6.95
  12  18 -15   26.12    7.10
  12 -18 -15   18.75    8.30
  13  19 -10   29.21    6.34
  13 -19 -10   12.62    8.18
  11 -19  -8   21.83    7.62
  11  19  -8   54.25    6.40
   9  19  -6   93.12    7.58
   9 -19  -6   73.48    8.06
   7 -19  -4    0.57    6.67
   7  19  -4   13.40    4.96
   5  19  -2   37.16    5.48
   5 -19  -2   20.85    6.87
   3 -19   0  139.12    8.97
   3  19   0  138.89    8.07
   1 -19   2  219.53   10.09
   1  19   2  233.44    9.08
  -1 -19  -2  214.73   10.46
   1 -19  -4   15.59    6.74
   3 -19  -6   34.39    7.03
   3  19  -6   47.51    5.61
   5 -19  -8    8.00    6.74
   5  19  -8   20.34    5.45
   7 -19 -10   85.12    8.57
   7  19 -10  101.42    8.25
   9  19 -12  159.36    9.73
   9 -19 -12  145.66   10.76
  11  19 -14   30.37    7.43
  11 -19 -14   24.60    8.52
  12  20  -9  155.03    9.51
  12 -20  -9  120.57   11.15
  10 -20  -7   34.80    8.10
  10  20  -7   65.49    6.59
   8  20  -5   58.58    6.10
   8 -20  -5   33.45    7.61
   6  20  -3   28.49    5.31
   6 -20  -3   18.27    6.92
   4  20  -1   22.03    5.44
   4 -20  -1   11.11    6.79
   2 -20   1  123.70    9.27
   2  20   1  123.28    7.62
   0 -20  -3   23.24    6.77
   0 -20   3   19.65    6.60
   2 -20  -5   92.35    8.38
   4 -20  -7    4.00    6.90
   4  20  -7   21.83    5.25
   6  20  -9   41.19    6.16
   6 -20  -9   19.52    7.49
   8 -20 -11  223.56   12.14
   8  20 -11  267.81   11.34
  10  20 -13   21.99    7.05
  11 -21  -8   42.74    8.61
  11  21  -8   58.20    7.06
   9 -21  -6    4.66    7.71
   7  21  -4   29.26    5.63
   7 -21  -4    4.14    7.17
   5  21  -2   42.04    5.65
   5 -21  -2   20.73    7.45
   3 -21   0    2.87    6.73
   3  21   0    9.83    5.06
   1 -21   2   12.02    6.68
   1 -21  -4   99.99    9.55
   3 -21  -6   -3.35    7.10
   5 -21  -8   16.40    7.86
   5  21  -8   37.61    5.85
   7  21 -10   11.33    6.05
   7 -21 -10   -0.22    7.90
   8  22  -5   36.07    6.10
   8 -22  -5   25.26    8.43
   6 -22  -3   -8.03    7.33
   4 -22  -1   -1.88    7.02
   2 -22   1   71.09    8.18
   0 -22  -3   60.12    8.52
   2 -22  -5   -1.40    7.56
   4 -22  -7   39.54    8.53
   5 -23  -2  122.46   10.78
  24   0 -20    5.02    5.63
  22   0 -18   61.18    6.44
  20   0 -16   47.22    5.62
  18   0 -14   58.14    5.62
  16   0 -12  650.62   14.50
  16   0 -12  641.14   15.26
  14   0 -10 3119.28   56.00
  14   0 -10 3041.14   56.05
  12   0  -8 1019.22   19.75
  12   0  -8 1020.03   20.34
  10   0  -6  448.82   10.45
  10   0  -6  439.23    9.50
   8   0  -4 2826.94   49.46
   8   0  -4 2721.96   49.50
   6   0  -2 1886.20   34.04
   6   0  -2 1893.66   33.94
  -4   0   0  616.74   11.57
  -2   0  -2    3.74    1.42
   0   0  -4  920.30   17.41
   0   0  -4  904.69   16.63
   0   0   4  911.18   19.20
   2   0  -6  969.35   18.62
   2   0  -6  966.70   17.56
   4   0  -8  708.72   13.19
   4   0  -8  684.22   14.39
   6   0 -10   39.66    3.81
   6   0 -10   33.27    3.43
   8   0 -12   33.15    3.13
   8   0 -12   33.03    3.80
  10   0 -14  338.04    8.97
  10   0 -14  317.48    9.75
  12   0 -16  802.73   16.78
  12   0 -16  753.83   17.82
  14   0 -18   97.25    7.57
  16   0 -20  809.38   19.64
  18   0 -22  617.86   16.99
  25  -1 -21  101.06    9.23
  25   1 -21  109.38    9.00
  23   1 -19    1.01    5.23
  23  -1 -19    0.00    5.22
  21   1 -17   36.35    5.64
  21  -1 -17   31.63    5.64
  19   1 -15  657.14   15.92
  19  -1 -15  632.21   15.79
  17   1 -13   -2.62    4.29
  17  -1 -13   -0.79    4.41
  17   1 -13   -0.78    3.30
  15   1 -11   14.53    3.07
  15  -1 -11    9.58    4.12
  15  -1 -11   16.40    3.02
  15   1 -11   14.71    4.14
  13   1  -9   35.67    3.12
  13  -1  -9   36.59    4.02
  13  -1  -9   36.76    2.92
  13   1  -9   32.73    3.96
  11  -1  -7  182.33    5.54
  11   1  -7  191.40    6.71
  11  -1  -7  183.07    6.61
  11   1  -7  186.03    5.77
   9   1  -5  489.28   10.07
   9  -1  -5  484.12    9.73
   9   1  -5  477.32   10.56
   9  -1  -5  479.73   10.71
   7  -1  -3  154.72    5.28
   7   1  -3  165.65    4.67
   7  -1  -3  155.98    3.93
   5  -1  -1    4.37    1.42
   5  -1  -1    1.06    2.61
   5   1  -1    6.14    2.06
   3  -1   1  196.44    4.85
  -3   1  -1  196.49    4.61
  -3  -1  -1  205.52    4.89
   1  -1   3   85.38    4.99
  -1  -1  -3   86.19    3.87
   1   1   3   79.03    4.20
  -1   1  -3   87.53    3.81
  -1   1   5  595.02   13.02
   1   1  -5  579.13   12.05
   1  -1  -5  564.81   11.02
  -1  -1   5  577.64   13.60
   1  -1  -5  577.26   11.84
   3  -1  -7   27.40    2.67
   3   1  -7   26.96    2.76
   3   1  -7   27.41    2.42
   3  -1  -7   28.80    2.09
   5  -1  -9   40.10    3.70
   5  -1  -9   48.64    4.58
   5   1  -9   43.87    3.43
   5   1  -9   45.82    3.31
   7  -1 -11  131.44    6.23
   7   1 -11  135.21    4.99
   7  -1 -11  137.54    5.25
   7   1 -11  140.92    6.27
   9  -1 -13   73.66    5.25
   9   1 -13   61.20    4.83
   9  -1 -13   67.10    5.77
   9   1 -13   63.98    5.60
  11  -1 -15   20.60    4.18
  11   1 -15   13.65    3.77
  11   1 -15   17.87    4.12
  11  -1 -15   23.20    4.06
  13  -1 -17   40.98    5.04
  13   1 -17   38.30    5.12
  13  -1 -17   31.82    4.97
  13   1 -17   39.74    4.66
  15   1 -19    1.72    4.41
  15  -1 -19    0.63    4.46
  17   1 -21   42.37    6.14
  17  -1 -21   36.24    5.88
  19   1 -23  111.36    9.32
  24   2 -20   23.83    6.08
  24  -2 -20   31.17    6.55
  22  -2 -18  123.05    8.45
  22   2 -18  118.97    8.34
  20   2 -16  235.53    9.58
  20  -2 -16  248.01    9.70
  18  -2 -14  104.81    7.48
  18   2 -14  103.89    7.18
  18   2 -14  116.86    7.00
  16   2 -12   61.92    5.86
  16   2 -12   73.39    5.59
  16  -2 -12   65.64    5.62
  14  -2 -10  423.46   10.01
  14  -2 -10  434.35   11.28
  14   2 -10  432.73   11.08
  14   2 -10  432.63   10.57
  12  -2  -8  214.01    6.07
  12  -2  -8  212.36    7.52
  12   2  -8  218.99    7.31
  12   2  -8  212.08    6.52
  10   2  -6  157.39    5.88
  10  -2  -6  158.39    6.34
  10   2  -6  157.85    5.40
  10  -2  -6  166.94    4.73
   8   2  -4 1783.45   31.64
   8  -2  -4 1695.37   31.70
   8  -2  -4 1716.47   31.15
   6   2  -2  148.94    4.69
   6  -2  -2  153.48    3.36
   6  -2  -2  145.10    5.38
   4  -2   0  294.89    7.33
  -4   2   0  321.10    6.20
   4   2   0  300.77    7.37
  -2   2  -2  353.69    7.57
  -2  -2  -2  362.02    7.77
   2  -2   2  347.07    7.16
   2  -2   2  362.15    9.49
   0   2  -4 1126.45   20.86
   0  -2  -4 1095.54   20.77
   0  -2   4 1089.12   23.51
   0   2   4 1131.65   22.67
   0  -2  -4 1103.46   20.26
   2  -2  -6  805.25   14.98
   2  -2  -6  785.33   15.59
  -2  -2   6  802.06   18.17
   2   2  -6  786.01   15.69
   4   2  -8  296.94    6.25
   4  -2  -8  289.24    7.61
   4   2  -8  291.33    7.71
   4  -2  -8  283.34    6.80
   6   2 -10  921.19   17.14
   6  -2 -10  901.90   17.57
   6  -2 -10  913.32   18.53
   6   2 -10  905.84   18.71
   8  -2 -12  514.57   11.42
   8  -2 -12  489.37   12.21
   8   2 -12  523.91   11.00
   8   2 -12  512.65   12.33
  10  -2 -14  619.11   14.71
  10   2 -14  620.72   14.99
  10   2 -14  643.11   13.53
  10  -2 -14  633.26   13.98
  12  -2 -16   26.83    4.67
  12   2 -16   25.80    4.13
  12  -2 -16   27.60    4.72
  12   2 -16   39.11    5.01
  14   2 -18    7.05    4.58
  14  -2 -18    5.73    4.52
  14  -2 -18   10.14    4.57
  16  -2 -20    9.94    5.10
  16   2 -20    4.43    4.96
  18   2 -22   51.03    6.62
  20   2 -24   -3.07    5.91
  25  -3 -21   17.26    6.63
  23  -3 -19   21.28    6.08
  23   3 -19   21.85    5.80
  21  -3 -17   16.95    5.44
  21   3 -17   32.10    5.41
  19   3 -15   -6.24    4.50
  19   3 -15   -2.93    3.71
  19  -3 -15    4.00    4.82
  17  -3 -13  152.46    8.03
  17   3 -13  158.60    7.57
  17   3 -13  162.79    8.04
  15  -3 -11    9.62    4.24
  15   3 -11    6.02    4.05
  15   3 -11   11.91    3.23
  13  -3  -9  217.08    6.13
  13   3  -9  209.04    6.90
  13  -3  -9  206.53    7.78
  13   3  -9  222.24    7.53
  11  -3  -7   19.01    2.02
  11  -3  -7   18.19    3.46
  11   3  -7   20.70    2.69
   9  -3  -5  420.52    8.42
   9   3  -5  424.65    9.38
   9  -3  -5  417.96    9.94
   7  -3  -3   64.54    4.33
   7   3  -3   64.42    3.89
   5   3  -1  217.43    5.84
   5  -3  -1  216.48    6.13
   3  -3   1  200.68    5.41
  -3  -3  -1  207.04    5.59
  -1  -3  -3    3.67    2.10
  -1  -3  -3    0.00    2.30
   1  -3   3   -1.32    1.50
  -1   3  -3   -1.54    2.07
   1  -3   3   -0.31    2.89
  -1  -3   5    2.03    3.08
   1  -3  -5    1.13    1.93
   1   3  -5   -1.03    2.12
   1  -3  -5    3.48    2.05
   3  -3  -7 1547.94   29.24
   3  -3  -7 1581.88   28.71
   3   3  -7 1624.03   28.27
  -3  -3   7 1584.77   33.54
   3   3  -7 1566.42   29.57
   5   3  -9  243.41    7.70
   5  -3  -9  233.60    7.07
   5   3  -9  247.28    5.82
   5  -3  -9  239.94    6.66
   7   3 -11  543.29   11.07
   7  -3 -11  536.75   11.78
   7  -3 -11  540.80   12.37
   7   3 -11  540.12   12.82
   9   3 -13  260.72    8.95
   9  -3 -13  266.97    8.58
   9  -3 -13  267.95    8.25
   9   3 -13  275.57    7.38
  11   3 -15  395.50   11.47
  11   3 -15  381.76    9.89
  11  -3 -15  384.49   11.03
  11  -3 -15  391.63   10.63
  13  -3 -17   11.76    4.34
  13  -3 -17   11.10    4.64
  13   3 -17   13.65    4.79
  15   3 -19   24.12    5.30
  15  -3 -19   17.36    4.86
  15  -3 -19   21.83    5.24
  17   3 -21   65.97    6.83
  19   3 -23    9.39    5.95
  21   3 -25   24.56    7.11
  24  -4 -20   -2.53    6.15
  22   4 -18  150.75    8.57
  22  -4 -18  139.61    8.98
  20  -4 -16   82.70    7.63
  20   4 -16   78.50    7.18
  20   4 -16   75.85    6.36
  18   4 -14  189.69    8.35
  18   4 -14  181.76    8.29
  18  -4 -14  168.19    8.58
  16   4 -12    8.96    3.67
  16   4 -12    7.74    4.50
  16  -4 -12    8.73    4.74
  14  -4 -10  483.72   12.34
  14   4 -10  493.38   12.10
  14   4 -10  481.58   11.70
  12   4  -8   49.20    3.53
  12  -4  -8   44.83    3.54
  12  -4  -8   48.62    4.22
  10   4  -6  530.55   11.60
  10  -4  -6  528.79   12.00
  10  -4  -6  539.43   10.45
   8   4  -4   10.67    2.37
   8  -4  -4    8.04    2.76
   6  -4  -2   -0.82    2.31
   6   4  -2    0.14    1.91
   4   4   0  222.20    6.05
  -4   4   0  220.78    4.72
   4  -4   0  223.78    5.88
   2  -4   2    7.16    2.94
   2  -4   2    5.45    1.83
  -2  -4  -2    4.29    2.27
  -2  -4  -2    7.34    2.03
  -2   4  -2    5.08    1.77
   0  -4   4  733.51   17.10
   0   4  -4  734.76   14.57
   0  -4  -4  739.18   14.42
   0  -4  -4  731.50   14.30
   0  -4   4  769.05   13.66
  -2  -4   6   96.34    6.81
   2   4  -6   91.04    4.42
   2  -4  -6  100.40    4.41
   2  -4  -6   96.42    4.36
   4  -4  -8  559.99   11.97
   4  -4  -8  573.57   11.81
   4   4  -8  549.32   12.36
   6  -4 -10  379.02    9.47
   6  -4 -10  372.73    9.27
   6   4 -10  378.42   10.14
   6   4 -10  398.06    8.32
   8  -4 -12   98.48    5.85
   8  -4 -12  106.98    5.96
   8   4 -12  112.08    6.70
   8   4 -12  106.86    4.86
  10   4 -14   39.98    3.72
  10  -4 -14   36.79    4.28
  10   4 -14   36.62    4.73
  10  -4 -14   44.07    4.64
  12   4 -16  120.53    7.79
  12  -4 -16  106.43    7.41
  12  -4 -16  105.04    6.89
  14   4 -18  252.27   10.32
  14  -4 -18  264.39    9.65
  14  -4 -18  278.77    9.74
  16  -4 -20   79.12    6.62
  16   4 -20   70.55    6.82
  18   4 -22   81.17    7.57
  20   4 -24    5.18    6.37
  25  -5 -21   13.71    7.19
  23  -5 -19    8.60    6.13
  23   5 -19    0.29    5.16
  21   5 -17    6.64    4.74
  21   5 -17    5.53    5.03
  21  -5 -17   -1.46    5.26
  19   5 -15   78.59    6.07
  19  -5 -15   74.15    6.57
  19   5 -15   86.05    7.30
  17   5 -13   -1.06    3.70
  17   5 -13    4.67    4.40
  17  -5 -13    0.23    4.70
  15   5 -11  404.62   11.17
  15   5 -11  408.47   10.97
  15  -5 -11  404.62   11.69
  13  -5  -9   64.94    6.06
  13   5  -9   60.15    5.16
  11  -5  -7   -0.90    1.57
  11  -5  -7    0.90    3.29
  11   5  -7    1.05    2.49
   9   5  -5  140.61    5.58
   9  -5  -5  143.33    5.96
   7  -5  -3  236.85    6.89
   7   5  -3  258.22    6.92
   5  -5  -1   54.55    4.03
   5   5  -1   60.60    3.97
   3   5   1   13.76    2.42
   3  -5   1   18.35    3.35
   3  -5   1   18.15    2.22
  -3   5  -1   17.65    1.71
   1  -5   3  122.36    3.89
  -1   5  -3  117.97    4.33
  -1  -5  -3  123.55    4.68
   1  -5   3  110.21    6.69
  -1  -5  -3  124.41    4.52
   1   5  -5  428.25    9.62
   1  -5  -5  429.64    9.33
   1  -5  -5  439.61    9.46
  -1  -5   5  419.08   12.00
   3  -5  -7  333.41    8.25
   3   5  -7  339.05    8.72
  -3  -5   7  336.72   11.29
   3  -5  -7  328.60    8.14
   5  -5  -9  683.17   14.41
   5   5  -9  705.08   15.07
   5  -5  -9  693.94   14.44
   7   5 -11    9.34    3.37
   7   5 -11    7.85    2.41
   7  -5 -11    3.23    2.95
   7  -5 -11    0.88    3.16
   9  -5 -13  593.89   13.59
   9   5 -13  575.60   12.34
   9   5 -13  566.50   14.41
   9  -5 -13  593.45   13.67
  11  -5 -15  266.50    9.45
  11   5 -15  256.75    9.73
  11  -5 -15  268.57    9.17
  13  -5 -17   96.73    7.72
  13  -5 -17   97.42    7.24
  13   5 -17  107.19    7.88
  15   5 -19   69.20    6.60
  15  -5 -19   59.41    6.27
  17   5 -21   -2.13    5.39
  17  -5 -21   -1.78    5.61
  19   5 -23   17.28    6.32
  21   5 -25    4.63    6.77
  24  -6 -20   80.99    8.36
  22   6 -18   29.24    5.76
  22  -6 -18   33.61    6.54
  22   6 -18   29.64    5.69
  20   6 -16    9.84    4.62
  20  -6 -16    8.28    5.52
  20   6 -16    6.26    4.88
  18  -6 -14   -1.20    4.84
  18   6 -14    4.62    4.33
  18   6 -14    7.53    4.19
  16   6 -12  238.95    8.95
  16   6 -12  254.19    9.09
  16  -6 -12  243.19    9.77
  14  -6 -10   63.25    5.47
  14   6 -10   60.78    4.58
  12   6  -8   -2.13    2.83
  12  -6  -8   -1.35    3.59
  10   6  -6    3.80    2.62
  10  -6  -6    8.53    3.37
   8   6  -4  711.91   14.78
   8  -6  -4  701.57   14.75
   6   6  -2  755.14   15.08
   6  -6  -2  732.26   14.90
  -4   6   0  431.90    8.37
   4  -6   0  405.00    9.15
   4   6   0  423.73    9.43
   4  -6   0  420.36   11.60
  -2   6  -2  126.11    4.31
   2  -6   2  136.12    4.53
  -2  -6  -2  125.64    5.01
   2  -6   2  133.04    6.80
   2   6   2  129.03    5.09
   0  -6   4  664.14   16.49
   0   6  -4  679.41   13.70
   0  -6  -4  669.51   13.66
   0  -6  -4  667.56   13.51
   0  -6   4  700.89   12.93
   2  -6  -6   84.32    4.39
   2   6  -6   81.43    5.01
   2  -6  -6   93.04    4.88
  -2  -6   6   91.28    7.39
   4  -6  -8  179.72    6.34
   4  -6  -8  176.01    5.97
   4   6  -8  174.74    6.72
   6  -6 -10   96.85    5.69
   6  -6 -10   87.80    5.20
   6   6 -10   91.08    5.75
   8   6 -12  145.43    5.49
   8   6 -12  148.13    7.34
   8  -6 -12  144.30    7.02
   8  -6 -12  142.18    6.53
  10   6 -14    1.52    4.28
  10  -6 -14    3.55    3.81
  10  -6 -14   -2.85    4.29
  12   6 -16   59.13    6.07
  12  -6 -16   58.79    5.28
  12  -6 -16   50.09    5.67
  14  -6 -18    5.93    5.11
  14   6 -18    8.25    5.00
  16   6 -20    3.08    5.30
  16  -6 -20    3.82    5.59
  18   6 -22   19.56    6.32
  20   6 -24   -2.89    6.43
  23  -7 -19    2.69    6.59
  23   7 -19    7.08    5.54
  21   7 -17    2.93    4.68
  21  -7 -17    0.15    5.93
  21   7 -17   -5.53    4.90
  19   7 -15    7.26    4.51
  19   7 -15    0.91    4.68
  19  -7 -15    6.75    5.52
  17   7 -13    7.29    4.18
  17   7 -13   10.64    4.52
  17  -7 -13    8.75    5.19
  15  -7 -11   11.92    5.07
  15   7 -11    9.45    4.01
  13   7  -9   27.87    4.00
  13  -7  -9   37.11    4.96
  11  -7  -7   45.16    4.50
  11   7  -7   41.07    3.74
   9  -7  -5  539.44   12.30
   9   7  -5  529.97   12.15
   7  -7  -3  864.83   17.60
   7   7  -3  896.62   17.82
  -5   7   1  792.90   14.41
   5  -7  -1  746.65   18.18
   5   7  -1  778.88   15.63
   5  -7  -1  760.58   15.39
   3  -7   1  785.79   18.69
   3  -7   1  789.07   15.50
   3   7   1  810.66   15.90
  -3   7  -1  791.88   15.14
   1  -7   3  259.81    6.45
  -1   7  -3  253.55    6.69
  -1  -7  -3  263.91    7.12
   1  -7   3  248.06    9.60
  -1  -7   5   32.42    4.73
   1  -7  -5   35.47    2.93
   1   7  -5   37.25    3.19
  -1  -7   5   35.97    2.59
   1  -7  -5   31.31    3.33
  -3  -7   7   86.59    8.13
   3  -7  -7   86.75    4.78
   3  -7  -7   83.52    5.28
   3   7  -7   71.80    5.22
   5  -7  -9  433.35   10.15
   5   7  -9  430.32   11.11
   5  -7  -9  443.68   10.71
   7   7 -11  217.86    8.35
   7  -7 -11  229.92    8.23
   7  -7 -11  214.83    7.19
   9   7 -13  120.03    7.21
   9  -7 -13  117.28    6.38
   9  -7 -13  118.97    7.48
  11  -7 -15   16.17    4.36
  11  -7 -15   19.72    5.34
  11   7 -15   21.95    5.11
  13   7 -17   18.17    5.36
  13  -7 -17   13.03    5.44
  15   7 -19   15.38    5.58
  15  -7 -19   10.17    5.99
  17  -7 -21   49.34    7.00
  17   7 -21   45.29    6.83
  19   7 -23   -6.67    5.98
  24  -8 -20   -0.81    7.03
  24   8 -20   14.69    6.12
  22  -8 -18   -2.50    6.19
  22   8 -18    5.26    5.17
  20   8 -16   29.11    5.44
  20  -8 -16   27.19    6.36
  20   8 -16   27.94    5.42
  18   8 -14   -1.56    4.54
  18   8 -14    2.92    4.44
  18  -8 -14   -1.29    5.29
  16   8 -12   28.26    4.62
  16  -8 -12   29.37    5.53
  14  -8 -10    1.19    4.76
  14   8 -10   -0.50    3.74
  12  -8  -8  150.79    7.61
  12   8  -8  144.38    6.70
  10  -8  -6  247.84    8.20
  10   8  -6  232.63    7.66
   8   8  -4  233.30    7.53
   8  -8  -4  241.16    7.65
   6   8  -2    2.98    2.79
   6  -8  -2    2.79    3.11
   6  -8  -2    4.23    3.89
  -6   8   2    4.08    1.71
  -4   8   0   46.74    3.38
   4  -8   0   49.31    4.62
   4   8   0   47.67    3.47
   4  -8   0   47.83    4.65
  -2   8  -2 1415.59   25.91
   2   8   2 1395.08   26.39
  -2  -8  -2 1389.16   26.28
   2  -8   2 1409.80   25.83
   2  -8   2 1360.58   30.22
   0  -8   4  233.62   10.00
   0  -8   4  245.34    6.47
   0  -8  -4  235.90    7.23
   0   8  -4  231.09    6.92
   2   8  -6  161.03    6.25
   2  -8  -6  162.08    6.38
  -2  -8   6  159.26    9.53
   2  -8  -6  164.38    5.80
   4   8  -8  524.03   12.53
   4  -8  -8  529.99   11.72
   4  -8  -8  537.84   12.42
   6   8 -10    6.83    3.64
   6  -8 -10    7.98    3.17
   6  -8 -10    3.11    3.91
   8   8 -12    0.18    3.94
   8  -8 -12    2.35    4.42
   8  -8 -12    6.33    3.45
  10  -8 -14   24.48    4.25
  10  -8 -14   26.98    5.56
  10   8 -14   21.92    5.07
  12  -8 -16   92.22    8.09
  12   8 -16   84.36    7.88
  14   8 -18   83.56    7.39
  14  -8 -18   88.06    8.47
  16   8 -20    6.24    5.84
  16  -8 -20   -5.91    6.10
  18   8 -22    1.17    6.08
  18  -8 -22    1.76    6.81
  23  -9 -19   12.34    7.24
  23   9 -19    4.64    5.73
  21  -9 -17   40.52    7.04
  21   9 -17   50.58    6.25
  19   9 -15   -2.80    4.65
  19  -9 -15   10.63    6.05
  19   9 -15    0.43    4.70
  17   9 -13   41.35    5.28
  17  -9 -13   36.15    5.93
  15  -9 -11   62.33    6.13
  15   9 -11   67.69    6.43
  13  -9  -9    0.53    4.76
  13   9  -9   -1.44    3.78
  11   9  -7   55.94    4.46
  11  -9  -7   55.43    5.21
   9   9  -5   35.05    3.89
   9  -9  -5   36.57    4.40
   7  -9  -3  100.18    5.89
   7   9  -3   88.92    5.72
   7  -9  -3   94.74    7.34
  -7   9   3  101.17    3.65
   5  -9  -1 1095.63   21.40
  -5   9   1 1119.24   20.37
   5   9  -1 1094.39   21.57
   5  -9  -1 1075.50   24.59
  -3   9  -1    0.88    2.16
   3  -9   1    4.16    2.91
   3   9   1    4.30    2.73
   3  -9   1    2.00    3.98
  -3  -9  -1    3.48    3.18
  -1  -9  -3  568.82   12.76
   1  -9   3  586.17   12.11
   1   9   3  564.20   12.63
  -1   9  -3  577.47   12.19
   1  -9   3  576.92   15.68
   1  -9  -5  939.34   19.10
   1  -9  -5  935.07   18.67
  -1  -9   5  967.22   18.23
  -1  -9   5  949.37   23.04
   1   9  -5  959.74   19.09
   3  -9  -7    3.93    2.71
  -3  -9   7    9.33    5.68
   3  -9  -7    4.22    3.62
   3   9  -7    0.99    3.13
   5  -9  -9   -1.81    3.89
   5  -9  -9   -2.45    2.87
   5   9  -9   -3.33    3.36
   7  -9 -11   -2.71    4.56
   7  -9 -11    7.67    3.52
   7   9 -11    3.71    4.17
   9  -9 -13  121.71    8.11
   9  -9 -13  125.80    6.68
   9   9 -13  117.15    8.13
  11  -9 -15   74.31    6.65
  11   9 -15   86.83    7.83
  13  -9 -17   -4.63    5.53
  13   9 -17    0.17    5.25
  15  -9 -19    6.83    6.32
  15   9 -19   -0.51    5.73
  17   9 -21    7.65    6.19
  17  -9 -21    1.68    6.81
  19  -9 -23   -2.62    7.82
  19   9 -23   14.10    7.04
  22  10 -18    9.15    5.68
  22 -10 -18   10.63    6.86
  20  10 -16  165.62    9.42
  20 -10 -16  158.68    9.90
  18  10 -14  460.74   13.51
  18 -10 -14  468.05   14.06
  18  10 -14  453.92   12.81
  16  10 -12  149.56    7.92
  16 -10 -12  147.79    8.69
  14  10 -10  339.58   10.53
  14 -10 -10  363.29   11.59
  12 -10  -8  308.98   10.64
  12  10  -8  293.16    9.51
  10  10  -6  302.85    9.28
  10 -10  -6  315.86   10.03
   8  10  -4  519.84   12.63
   8 -10  -4  543.61   12.93
   8 -10  -4  531.04   14.83
   6  10  -2   18.26    3.48
   6 -10  -2   15.25    3.89
   6 -10  -2   18.93    4.44
  -6  10   2   18.78    2.30
  -4  10   0  139.65    4.86
   4 -10   0  145.28    8.21
   4  10   0  148.06    6.18
   4 -10   0  138.95    6.24
   2  10   2   18.22    3.17
   2 -10   2   16.49    4.29
   2 -10   2   25.06    3.43
  -2  10  -2   19.62    2.82
  -2 -10  -2   21.33    3.70
   0 -10  -4  740.98   15.90
   0  10   4  745.34   15.68
   0 -10   4  749.49   15.09
   0 -10   4  727.80   19.02
   0  10  -4  749.75   15.49
  -2 -10   6   -1.39    4.89
   2  10  -6    0.89    3.05
   2 -10  -6    1.41    3.69
   2 -10  -6    0.92    2.84
   4 -10  -8  136.05    7.21
   4 -10  -8  137.70    5.84
   4  10  -8  133.04    6.73
   6 -10 -10    4.51    4.56
   6 -10 -10    4.50    3.50
   6  10 -10   -1.21    3.95
   8 -10 -12   46.77    4.60
   8 -10 -12   39.06    5.94
   8  10 -12   37.43    5.36
  10  10 -14  149.60    8.77
  10 -10 -14  147.82    8.89
  12 -10 -16   51.38    6.64
  12  10 -16   51.39    6.37
  14 -10 -18  214.92   10.78
  14  10 -18  215.00   10.86
  16 -10 -20  125.92   10.07
  16  10 -20  115.57    9.81
  18 -10 -22  163.30   11.61
  18  10 -22  160.99   10.97
  23  11 -19   36.14    6.75
  21 -11 -17   12.62    6.97
  21  11 -17   27.44    5.96
  19  11 -15    9.54    5.28
  19 -11 -15   -0.90    6.20
  17 -11 -13   18.58    6.19
  17  11 -13   23.51    5.14
  15  11 -11  130.17    7.74
  15 -11 -11  133.75    8.55
  13 -11  -9  174.39    8.76
  13  11  -9  174.90    7.97
  11 -11  -7  106.90    8.03
  11  11  -7   97.90    6.72
   9 -11  -5  114.50    8.35
   9  11  -5  113.19    6.74
   9 -11  -5  115.65    7.44
   7 -11  -3   37.04    4.80
   7  11  -3   34.34    4.14
   7 -11  -3   37.24    5.40
  -5  11   1    4.55    2.34
   5 -11  -1    1.67    3.96
   5  11  -1    4.53    3.42
   5 -11  -1    5.42    4.29
   3 -11   1   13.41    3.70
   3  11   1   14.24    3.41
   3 -11   1   10.05    4.29
  -3  11  -1   11.59    2.68
  -3 -11  -1    9.76    3.88
   1  11   3   68.01    5.36
  -1  11  -3   74.63    4.96
   1 -11   3   87.07    8.45
  -1 -11  -3   77.93    5.93
   1 -11   3   77.87    5.50
  -1  11   5   51.69    4.30
  -1 -11   5   51.28    4.06
  -1 -11   5   49.51    6.04
   1 -11  -5   51.54    4.80
   1  11  -5   53.03    4.07
   3 -11  -7   35.24    4.80
  -3 -11   7   36.19    6.61
   3  11  -7   31.24    4.16
   5  11  -9   -0.43    3.99
   5 -11  -9   -0.52    3.49
   5 -11  -9    0.39    4.71
   7 -11 -11    4.14    3.86
   7  11 -11   -7.19    4.55
   7 -11 -11    1.04    5.28
   9 -11 -13    3.25    5.66
   9  11 -13   18.06    5.25
  11  11 -15  107.09    8.45
  11 -11 -15   95.61    8.34
  13  11 -17   40.33    6.50
  13 -11 -17   31.55    6.82
  15 -11 -19   -2.32    6.95
  15  11 -19    8.18    6.34
  17 -11 -21   62.82    8.65
  17  11 -21   60.18    8.12
  22  12 -18   53.93    7.24
  20  12 -16   76.04    7.19
  20 -12 -16   71.76    8.16
  18  12 -14   14.20    5.38
  18 -12 -14   11.35    6.42
  16  12 -12   17.02    5.02
  16 -12 -12    9.59    6.17
  14 -12 -10   21.93    5.77
  14  12 -10   16.17    4.77
  12 -12  -8  232.14    9.70
  12  12  -8  225.73    8.73
  10 -12  -6   19.64    5.61
  10 -12  -6   25.10    5.66
  10  12  -6    9.91    4.27
   8  12  -4  391.29   11.12
   8 -12  -4  402.85   12.97
   8 -12  -4  411.53   11.80
   6 -12  -2  200.59   10.01
   6  12  -2  187.83    7.91
   6 -12  -2  208.08    8.20
  -4  12   0    0.69    2.59
   4  12   0   -1.11    3.57
   4 -12   0    1.55    4.79
   4 -12   0    5.34    4.14
  -2  12  -2  118.84    5.60
   2 -12   2  112.19    6.50
  -2 -12  -2  117.21    6.87
   2 -12   2  127.95    9.19
   2  12   2  118.09    6.18
   0 -12   4  392.96   10.00
   0 -12  -4  381.79   10.96
   0 -12   4  399.93   13.95
   0  12   4  388.50   10.30
   0  12  -4  366.89    9.71
   2 -12  -6  204.97    8.43
  -2 -12   6  195.84   11.04
   2  12  -6  200.41    7.80
  -2  12   6  208.38    7.86
   4 -12  -8    0.40    4.80
   4  12  -8   -0.83    4.04
   6  12 -10  169.04    8.59
   6 -12 -10  183.32    7.61
   6 -12 -10  162.54    9.11
   8 -12 -12    3.27    5.54
   8  12 -12    0.12    4.97
  10  12 -14   80.56    6.85
  10 -12 -14   58.28    6.88
  12 -12 -16   43.29    7.17
  12  12 -16   44.52    6.61
  14  12 -18    2.89    5.87
  14 -12 -18    3.21    6.86
  16  12 -20   25.24    7.09
  16 -12 -20   20.78    7.88
  18 -12 -22   67.37    9.37
  21 -13 -17   -0.57    7.37
  21  13 -17    7.46    6.25
  19 -13 -15   97.03    8.77
  19  13 -15  116.21    8.71
  17 -13 -13    5.68    6.48
  17  13 -13    7.20    5.20
  15 -13 -11   17.31    6.26
  15  13 -11   17.93    5.24
  13  13  -9  145.14    7.81
  13 -13  -9  146.02    8.86
  11  13  -7   24.34    4.52
  11 -13  -7   33.34    5.92
   9  13  -5  462.04   12.85
   9 -13  -5  503.44   13.74
   9 -13  -5  513.13   15.08
   7 -13  -3    5.79    5.25
   7  13  -3    0.73    4.16
   7 -13  -3   -3.39    5.32
   5 -13  -1  191.25    9.98
   5  13  -1  167.77    7.73
   5 -13  -1  188.76    8.36
   3 -13   1  325.53    9.64
   3 -13   1  329.28   12.48
  -3  13  -1  295.60    8.28
   3  13   1  315.95    9.49
  -3 -13  -1  308.86   10.00
   1 -13   3   21.60    6.16
  -1  13  -3   10.18    3.48
   1  13   3   17.03    4.10
  -1 -13  -3   12.91    4.84
   1 -13   3   14.09    4.35
  -1 -13   5   -1.36    4.04
   1 -13  -5   -2.55    4.71
   1  13  -5   -0.89    3.74
  -1  13   5   -0.93    3.79
  -1 -13   5    0.74    5.79
   3 -13  -7   33.43    5.58
  -3 -13   7   48.78    8.06
  -3  13   7   37.60    4.68
   3  13  -7   34.65    4.83
   5  13  -9  140.88    7.96
   5 -13  -9  160.48    8.87
   7 -13 -11  229.68   10.01
   7  13 -11  235.24    9.74
   9  13 -13   68.60    6.83
   9 -13 -13   65.24    6.99
  11 -13 -15   45.46    7.21
  11  13 -15   38.45    6.50
  13 -13 -17   -4.87    6.75
  13  13 -17    0.78    6.13
  15 -13 -19  138.10   10.80
  15  13 -19  134.40   10.11
  17 -13 -21   22.27    8.42
  20 -14 -16    5.58    7.82
  20  14 -16   13.18    6.23
  18  14 -14   41.12    6.38
  18 -14 -14   39.28    7.59
  16  14 -12   21.53    5.63
  16 -14 -12    9.54    6.74
  14 -14 -10  179.41    9.82
  14  14 -10  176.18    8.77
  12  14  -8    6.56    4.47
  12 -14  -8    5.43    5.80
  10 -14  -6   -5.26    5.40
  10  14  -6    1.37    4.20
   8 -14  -4   93.29    8.11
   8  14  -4   91.48    7.03
   8 -14  -4  101.31    9.38
   6 -14  -2  111.20    9.82
   6  14  -2   83.82    7.10
   6 -14  -2   98.96    8.09
   4 -14   0    0.17    4.82
   4 -14   0    0.91    5.51
   4  14   0    1.04    4.30
   2 -14   2  337.43   13.42
   2  14   2  323.65    9.84
  -2 -14  -2  324.68   10.58
   2 -14   2  333.06   10.17
  -2  14  -2  314.51    8.99
   0 -14   4   -1.42    5.93
   0  14   4   -4.10    4.16
   0 -14  -4   -1.79    4.98
   0 -14   4   -0.58    4.64
   0  14  -4    2.57    3.91
  -2  14   6    6.50    4.31
   2  14  -6    3.23    4.29
  -2 -14   6    1.75    7.70
   2 -14  -6    9.54    5.37
  -4  14   8    1.64    4.43
   4 -14  -8    5.05    5.55
   4  14  -8    3.97    4.39
  -6  14  10   56.12    5.44
   6 -14 -10   59.13    6.51
   6  14 -10   59.15    5.95
   8 -14 -12  168.05    9.65
   8  14 -12  191.00    9.43
  10 -14 -14   -6.00    6.38
  10  14 -14    4.26    5.91
  12 -14 -16    8.34    6.78
  12  14 -16    9.16    6.20
  14  14 -18    9.82    6.63
  14 -14 -18   -0.56    7.44
  16 -14 -20  162.68   11.92
  19 -15 -15    8.12    7.90
  19  15 -15   22.86    6.65
  17  15 -13   72.97    7.05
  17 -15 -13   70.49    8.36
  15 -15 -11   43.89    7.41
  15  15 -11   53.01    6.26
  13 -15  -9   -4.04    6.21
  13  15  -9   13.00    5.07
  11  15  -7   83.97    6.80
  11 -15  -7   63.55    7.07
   9  15  -5   38.41    5.13
   9 -15  -5   45.03    6.38
   7  15  -3    6.07    4.51
   7 -15  -3    7.01    5.68
   5  15  -1    7.02    4.60
   5 -15  -1   12.14    6.39
   5 -15  -1    9.71    5.43
   3 -15   1   -4.06    6.23
   3  15   1   -4.91    4.33
   3 -15   1   -3.22    5.09
   1 -15   3   60.56    5.81
   1  15   3   62.47    5.18
   1 -15   3   60.32    7.95
  -1 -15  -3   59.09    6.18
  -1  15  -3   53.54    4.66
  -1  15   5   41.26    4.87
  -1 -15   5   41.05    8.49
  -1 -15   5   42.24    5.38
   1 -15  -5   43.53    6.15
   1  15  -5   40.61    4.69
   3 -15  -7    4.09    5.35
  -3  15   7   -0.43    4.14
   3  15  -7    6.82    4.35
   5  15  -9   38.82    5.54
  -5  15   9   40.77    4.96
   5 -15  -9   47.13    6.55
   7 -15 -11  274.19   11.06
   7  15 -11  285.35   10.77
   9  15 -13  114.02    8.99
   9 -15 -13  110.86    9.16
  11  15 -15   10.51    6.25
  11 -15 -15   -4.97    6.77
  13  15 -17    2.49    6.40
  13 -15 -17    8.12    7.53
  15  15 -19   13.01    7.19
  15 -15 -19   -0.90    7.90
  18  16 -14   23.31    6.59
  18 -16 -14   20.44    8.13
  16 -16 -12   10.02    7.38
  16  16 -12   23.54    5.98
  14 -16 -10  140.94   10.05
  14  16 -10  142.38    8.74
  12 -16  -8  112.75    9.21
  12  16  -8  122.95    7.79
  10 -16  -6   24.60    6.64
  10  16  -6   24.05    5.13
   8 -16  -4  239.08   10.16
   8  16  -4  245.94    9.26
   6  16  -2   77.89    6.91
   6 -16  -2   82.78    6.94
   4 -16   0  111.87   10.37
   4  16   0   96.15    7.16
   4 -16   0  107.13    7.81
  -2 -16  -2    0.24    5.27
   2  16   2    4.22    4.45
   2 -16   2   -2.37    5.01
   2 -16   2   -7.19    6.63
   0  16   4   70.61    6.50
   0 -16  -4   61.81    6.61
   0 -16   4   66.09    5.96
   0 -16   4   83.82    9.21
   0  16  -4   77.64    6.03
   2  16  -6   27.60    4.59
   2 -16  -6   18.24    5.84
  -2  16   6   15.07    4.28
   4 -16  -8  301.98   11.22
   4  16  -8  322.95   10.44
   6 -16 -10  468.33   14.50
   6  16 -10  510.97   14.17
   8 -16 -12  240.49   11.11
   8  16 -12  264.80   10.84
  10 -16 -14  136.09   10.08
  10  16 -14  151.11    9.80
  12  16 -16   27.65    6.92
  12 -16 -16    6.51    7.38
  14 -16 -18   86.24    9.69
  14  16 -18   91.48    9.01
  17  17 -13   76.51    7.49
  17 -17 -13   63.25    9.03
  15  17 -11   23.59    6.02
  15 -17 -11    5.40    7.27
  13  17  -9   10.59    5.29
  13 -17  -9    4.96    6.94
  11  17  -7   49.42    5.96
  11 -17  -7   36.96    7.30
   9 -17  -5  190.48    9.97
   9  17  -5  207.08    8.84
   7 -17  -3  104.08    8.55
   7  17  -3  114.13    7.52
   5 -17  -1   11.17    5.94
   5  17  -1    3.79    4.73
   3  17   1  261.17    9.49
   3 -17   1  258.74    9.94
  -1 -17  -3   90.36    7.95
   1  17   3   91.63    7.14
   1 -17   3   98.22    7.64
   1 -17   3  114.53   11.70
  -1 -17   5  -18.44    8.63
   1  17  -5   16.31    4.46
  -1  17   5   13.31    4.52
   1 -17  -5   14.45    5.91
   3 -17  -7   30.98    6.66
   3  17  -7   42.05    5.29
   5 -17  -9   10.21    6.49
   5  17  -9   27.38    5.56
   7  17 -11   98.18    8.22
   7 -17 -11   92.52    8.25
   9 -17 -13   42.30    7.66
   9  17 -13   43.15    6.92
  11  17 -15   41.27    7.35
  11 -17 -15   31.57    8.24
  13 -17 -17    7.74    8.42
  13  17 -17   18.40    7.23
  16 -18 -12   16.48    8.26
  14 -18 -10  194.49   11.77
  14  18 -10  224.52   10.35
  12 -18  -8  271.31   12.13
  12  18  -8  288.75   10.74
  10  18  -6   11.60    4.98
  10 -18  -6    1.47    6.78
   8 -18  -4  290.79   11.69
   8  18  -4  312.34   10.54
   6 -18  -2  256.28   10.69
   6  18  -2  255.12    9.62
   4  18   0   17.10    5.01
   4 -18   0    8.70    5.97
   2  18   2  247.75    9.43
   2 -18   2  247.89    9.88
  -2 -18  -2  256.92   10.64
   0  18   4  499.90   13.22
   0 -18   4  503.25   13.58
   0 -18   4  515.06   19.40
   0 -18  -4  465.53   14.15
   2  18  -6  140.25    7.67
   2 -18  -6  118.04    8.97
   4  18  -8   85.22    7.44
   4 -18  -8   80.03    7.96
   6 -18 -10  129.71    9.61
   6  18 -10  150.99    8.79
   8 -18 -12    8.72    7.26
   8  18 -12   24.46    6.20
  10 -18 -14   -4.51    7.30
  10  18 -14   18.37    6.65
  12  18 -16   42.55    7.77
  13 -19  -9   -1.00    7.74
  13  19  -9   18.66    6.10
  11  19  -7   59.63    6.39
  11 -19  -7   42.90    8.04
   9  19  -5   13.00    5.25
   9 -19  -5    9.20    7.05
   7  19  -3   10.63    5.11
   7 -19  -3   -0.05    6.54
   5  19  -1   12.74    5.18
   5 -19  -1    5.70    6.29
   3  19   1   35.50    5.49
   3 -19   1   32.29    6.41
  -1 -19  -3  109.75    9.05
   1 -19   3  118.66    8.82
   1  19   3  121.15    7.91
   1 -19  -5    4.63    6.41
   3 -19  -7   35.53    7.22
   3  19  -7   58.57    5.81
   5  19  -9  106.90    8.00
   5 -19  -9   98.46    9.28
   7 -19 -11   33.87    7.68
   7  19 -11   50.29    6.84
   9  19 -13   23.88    6.81
   9 -19 -13    5.67    7.71
  12 -20  -8   11.53    8.09
  10 -20  -6    7.69    7.37
  10  20  -6   25.40    5.81
   8  20  -4  100.74    7.92
   8 -20  -4   89.27    8.60
   6  20  -2  145.00    8.14
   6 -20  -2  113.48    9.47
   4 -20   0   49.33    7.18
   4  20   0   51.17    6.05
   2  20   2  129.76    7.85
   2 -20   2  122.97    9.13
   0 -20  -4   13.88    6.73
   2 -20  -6    7.82    7.01
   4  20  -8   57.14    6.21
   4 -20  -8   39.86    7.59
   6 -20 -10   39.41    8.18
   6  20 -10   64.01    6.93
   8 -20 -12    9.59    7.95
   8  20 -12    9.44    6.46
  11 -21  -7  -10.07    7.74
   9  21  -5   54.31    6.51
   9 -21  -5    8.29    7.96
   7  21  -3  322.81   11.20
   7 -21  -3  271.54   12.40
   5  21  -1   48.13    6.14
   5 -21  -1   36.69    7.41
   3 -21   1   16.15    6.90
   3  21   1   25.31    5.53
   1 -21  -5   11.65    7.42
   3 -21  -7    9.93    7.64
   5 -21  -9   15.49    7.82
   5  21  -9   25.51    6.10
   7  21 -11   12.74    6.41
   8 -22  -4   16.11    8.18
   8  22  -4   36.45    6.23
   6  22  -2   42.43    6.17
   6 -22  -2   12.53    7.76
   4  22   0   16.50    5.64
   4 -22   0    8.12    7.45
   0 -22  -4   30.04    8.17
   2 -22  -6    0.65    7.72
   5  23  -1   33.22    6.04
   5 -23  -1    7.40    7.84
  26   0 -21    9.55    6.34
  24   0 -19    2.33    5.41
  22   0 -17   -1.30    5.06
  20   0 -15   -1.53    4.64
  18   0 -13    2.68    4.46
  16   0 -11   -0.24    2.70
  16   0 -11   -1.75    4.07
  14   0  -9   -4.65    2.16
  14   0  -9    0.59    3.59
  12   0  -7    1.56    3.11
  12   0  -7   -1.33    1.82
  10   0  -5   -1.13    1.69
  10   0  -5    0.34    2.76
   8   0  -3   -0.59    2.29
   8   0  -3   -0.14    1.50
   6   0  -1    0.06    1.47
  -4   0  -1    5.72    2.02
  -2   0  -3    1.36    2.19
   2   0   3   -0.46    2.79
   0   0  -5    5.05    2.39
   0   0  -5    3.39    1.46
   0   0   5    3.20    2.79
   2   0  -7   -1.99    2.34
   2   0  -7   -2.52    1.40
  -2   0   7    1.43    3.14
   4   0  -9   -0.84    1.71
   4   0  -9   -2.41    2.52
   6   0 -11   -1.24    2.90
   6   0 -11   -1.33    2.17
   8   0 -13   -0.48    2.69
   8   0 -13    2.07    3.25
  10   0 -15    2.29    3.37
  10   0 -15    1.26    3.68
  12   0 -17   -2.60    3.95
  12   0 -17   -5.20    4.10
  14   0 -19   -2.54    4.37
  16   0 -21    0.64    4.99
  18   0 -23   -4.98    5.40
  25   1 -20    3.49    5.77
  25  -1 -20    5.06    5.85
  23   1 -18  107.31    8.30
  23  -1 -18   99.88    8.14
  21  -1 -16   82.47    7.71
  21   1 -16  102.03    7.87
  19   1 -14    2.06    4.36
  19  -1 -14   11.54    4.77
  17   1 -12   18.25    4.73
  17   1 -12   13.66    3.42
  17  -1 -12   15.79    4.84
  15   1 -10    5.89    2.78
  15  -1 -10    6.70    4.05
  15  -1 -10    6.82    2.61
  15   1 -10    2.93    3.88
  13  -1  -8   78.75    4.33
  13  -1  -8   67.03    5.58
  13   1  -8   63.60    5.56
  13   1  -8   70.98    4.46
  11  -1  -6  510.96   10.58
  11   1  -6  511.09   11.61
  11   1  -6  530.25   10.97
  11  -1  -6  511.57   11.75
   9   1  -4    8.53    1.83
   9  -1  -4    7.19    2.62
   9  -1  -4    9.81    1.52
   9   1  -4    6.28    2.57
   7  -1  -2  226.96    6.49
   7  -1  -2  247.42    5.29
   7   1  -2  241.41    5.75
   5  -1   0  473.06    9.73
  -5   1   0  467.68    8.93
   5   1   0  442.87    9.67
  -3   1  -2  656.47   12.76
  -3  -1  -2  665.43   12.87
  -1  -1  -4  547.28   11.31
  -1   1  -4  545.41   11.25
   1   1   4  539.06   12.24
   1  -1   4  545.21   12.84
  -1  -1   6  512.35   12.58
   1  -1  -6  516.31   10.96
   1   1  -6  518.20   11.03
  -1   1   6  504.06   11.99
   1  -1  -6  512.54    9.91
   3  -1  -8   54.61    4.49
   3   1  -8   52.06    4.55
   3  -1  -8   56.46    3.23
   3   1  -8   57.73    2.67
   5  -1 -10  432.23   10.61
   5   1 -10  440.61    8.96
   5   1 -10  423.28   10.63
   5  -1 -10  430.32    9.29
   7   1 -12    4.92    2.40
   7  -1 -12    1.82    3.10
   7   1 -12    2.16    3.17
   7  -1 -12    4.45    2.65
   9   1 -14   13.31    3.79
   9  -1 -14    5.02    3.27
   9   1 -14    7.87    3.03
   9  -1 -14    6.05    3.56
  11   1 -16  216.51    7.53
  11   1 -16  202.14    8.72
  11  -1 -16  200.31    8.62
  11  -1 -16  208.23    7.96
  13   1 -18  504.99   14.06
  13  -1 -18  518.66   14.03
  15   1 -20   93.14    7.83
  15  -1 -20   92.24    8.21
  17  -1 -22   34.44    6.20
  17   1 -22   42.98    6.38
  19   1 -24   -6.76    5.84
  26  -2 -21   36.95    7.33
  26   2 -21   32.60    6.71
  24   2 -19   36.06    6.40
  24  -2 -19   38.54    6.59
  22  -2 -17   65.47    6.41
  22   2 -17   61.27    6.36
  20  -2 -15   14.28    5.11
  20   2 -15   11.01    4.91
  18  -2 -13   60.06    5.73
  18   2 -13   63.03    4.77
  18   2 -13   65.91    5.82
  16   2 -11  127.45    6.31
  16  -2 -11  135.79    7.49
  16   2 -11  127.47    7.47
  14   2  -9   44.31    4.33
  14  -2  -9   41.29    4.41
  14   2  -9   37.82    3.29
  14  -2  -9   43.27    3.02
  12   2  -7  121.49    5.87
  12   2  -7  121.31    5.05
  12  -2  -7  124.75    6.31
  12  -2  -7  120.61    4.43
  10  -2  -5  628.82   12.00
  10   2  -5  615.22   12.58
  10  -2  -5  612.70   13.29
   8  -2  -3  106.22    3.02
   8  -2  -3  104.74    4.88
   8   2  -3  105.81    4.33
   6  -2  -1  677.42   12.38
   6  -2  -1  663.35   13.29
   6   2  -1  660.45   12.93
  -4   2  -1  900.56   16.81
   4  -2   1  920.57   17.06
  -4  -2  -1  924.43   17.19
  -2   2  -3    9.64    2.14
   2  -2   3    8.73    3.00
  -2  -2  -3    9.46    2.17
   2  -2   3    7.05    1.74
   0   2  -5    0.42    2.16
   0  -2  -5    1.56    1.90
   0  -2   5   -1.73    2.78
   0  -2  -5    4.18    2.10
   0   2   5    0.62    2.10
   2   2  -7  601.71   12.55
   2  -2  -7  597.47   12.47
   2  -2  -7  591.19   11.55
  -2  -2   7  586.04   14.68
   4   2  -9  711.45   13.07
   4  -2  -9  692.18   14.67
   4  -2  -9  706.69   13.72
   4   2  -9  692.94   14.88
   6   2 -11   21.01    3.38
   6  -2 -11   19.51    2.81
   6  -2 -11   20.95    3.35
   6   2 -11   15.71    2.31
   8  -2 -13  114.97    5.60
   8  -2 -13  107.19    6.51
   8   2 -13  112.74    6.21
   8   2 -13  114.28    5.01
  10  -2 -15   22.33    4.23
  10   2 -15   28.73    3.63
  10   2 -15   17.47    4.25
  10  -2 -15   19.96    4.01
  12  -2 -17  271.55    9.20
  12  -2 -17  272.04   10.06
  12   2 -17  258.69    9.97
  14  -2 -19   53.96    5.83
  14   2 -19   51.25    5.91
  16   2 -21   21.99    5.74
  16  -2 -21   17.42    5.49
  18   2 -23   37.06    6.66
  20   2 -25   -5.20    6.20
  25   3 -20   54.85    6.82
  25  -3 -20   55.27    7.31
  23   3 -18  216.74    9.94
  23  -3 -18  217.68   10.18
  21  -3 -16   84.57    7.52
  21   3 -16   82.92    7.49
  19   3 -14    6.81    4.70
  19  -3 -14    3.98    4.62
  19   3 -14   12.89    3.81
  17   3 -12  159.13    7.29
  17  -3 -12  166.45    8.24
  17   3 -12  158.01    8.12
  15  -3 -10  367.86   10.52
  15   3 -10  342.19    9.44
  15   3 -10  340.34   10.06
  13   3  -8   97.04    5.84
  13   3  -8   95.66    5.02
  13  -3  -8  100.30    4.22
  13  -3  -8   91.09    6.10
  11  -3  -6   35.51    3.66
  11   3  -6   31.75    2.77
  11  -3  -6   33.59    2.92
   9   3  -4  197.55    5.87
   9  -3  -4  196.02    6.44
   9  -3  -4  199.28    4.49
   7   3  -2  502.84   10.34
   7  -3  -2  484.05   10.55
   5   3   0 2263.98   40.47
  -5   3   0 2238.19   40.80
   5  -3   0 2232.97   40.04
  -3  -3  -2  143.43    4.91
  -3   3  -2  145.92    4.34
   3  -3   2  149.72    6.71
   3  -3   2  139.51    4.33
   1   3   4   56.71    3.17
  -1  -3  -4   58.54    3.95
  -1  -3  -4   54.92    3.75
   1  -3   4   56.72    5.81
   1  -3   4   56.91    2.28
  -1   3  -4   55.84    3.93
   1  -3  -6  252.14    6.70
  -1  -3   6  251.93    8.85
   1   3  -6  261.63    6.95
   1  -3  -6  257.09    6.27
   3  -3  -8  207.75    5.84
   3   3  -8  208.95    6.80
   3  -3  -8  203.46    6.44
  -3  -3   8  205.54    9.09
   5   3 -10  350.88    9.51
   5  -3 -10  342.71    9.08
   5   3 -10  359.15    7.49
   5  -3 -10  346.48    8.47
   7  -3 -12  555.85   12.15
   7   3 -12  560.55   11.38
   7   3 -12  553.92   13.35
   9  -3 -14  123.38    6.44
   9   3 -14  123.74    7.22
   9   3 -14  126.76    5.60
   9  -3 -14  134.07    6.90
  11  -3 -16   43.60    4.98
  11  -3 -16   48.75    4.97
  11   3 -16   49.04    5.35
  13  -3 -18   84.20    7.07
  13   3 -18   78.56    6.42
  13  -3 -18   76.93    6.10
  15   3 -20   23.70    5.64
  15  -3 -20   16.37    5.22
  17   3 -22  217.14   10.62
  19   3 -24    3.71    6.13
  24  -4 -19   -5.42    5.83
  24   4 -19    4.75    5.68
  22   4 -17    0.92    5.00
  22  -4 -17    7.57    5.50
  20   4 -15  246.79    9.73
  20   4 -15  267.56    9.78
  20  -4 -15  248.96   10.01
  18   4 -13   63.09    4.96
  18  -4 -13   52.27    5.70
  18   4 -13   62.94    5.61
  16  -4 -11    6.14    4.52
  16   4 -11    6.07    4.36
  16   4 -11    7.62    3.44
  14   4  -9  317.34    9.00
  14  -4  -9  328.89    9.94
  14   4  -9  330.90    9.61
  12  -4  -7   -0.18    1.64
  12   4  -7    2.03    2.40
  12  -4  -7   -1.14    3.28
  10  -4  -5  235.74    7.40
  10   4  -5  246.07    6.85
   8  -4  -3  138.29    5.71
   8   4  -3  143.41    5.24
   6  -4  -1  283.26    7.07
   6   4  -1  295.60    7.12
   4   4   1  555.37   11.77
   4  -4   1  565.93   11.13
  -4   4  -1  562.71   10.72
   4  -4   1  555.95   13.84
   2  -4   3   73.14    5.21
  -2   4  -3   73.46    3.63
  -2  -4  -3   77.48    3.80
  -2  -4  -3   77.15    4.07
   2  -4   3   78.68    3.19
   0   4  -5  126.18    4.94
   0  -4  -5  135.33    4.84
   0  -4   5  134.13    7.04
   0  -4   5  138.47    3.31
   0  -4  -5  133.77    4.87
   2   4  -7    5.74    2.61
   2  -4  -7    5.69    2.28
   2  -4  -7    7.56    2.36
  -2  -4   7    5.64    3.66
   4  -4  -9  144.93    5.89
   4   4  -9  138.70    6.40
   4   4  -9  151.50    4.14
   4  -4  -9  148.58    5.56
   6  -4 -11   74.79    5.35
   6  -4 -11   77.49    5.30
   6   4 -11   85.80    3.89
   6   4 -11   85.16    5.94
   8   4 -13  246.28    8.85
   8  -4 -13  260.27    8.51
   8   4 -13  251.15    6.93
   8  -4 -13  249.71    8.01
  10  -4 -15   22.03    4.37
  10   4 -15   23.62    4.78
  10  -4 -15   18.86    4.18
  12   4 -17   16.29    4.94
  12  -4 -17   13.62    4.68
  12  -4 -17   15.95    4.56
  14  -4 -19   35.79    5.56
  14   4 -19   28.02    5.64
  14  -4 -19   30.04    5.19
  16   4 -21    1.50    5.41
  18   4 -23   44.74    6.91
  20   4 -25   -4.60    6.31
  25  -5 -20    9.57    6.91
  23   5 -18    2.14    5.35
  23  -5 -18    0.71    5.72
  21   5 -16   28.11    5.49
  21   5 -16   35.11    5.15
  21  -5 -16   26.05    5.87
  19   5 -14    3.50    4.69
  19   5 -14   13.10    4.16
  19  -5 -14    7.12    4.98
  17  -5 -12   36.76    5.37
  17   5 -12   24.93    4.08
  17   5 -12   33.90    5.01
  15   5 -10    8.75    3.45
  15   5 -10   13.91    4.30
  15  -5 -10   10.04    4.56
  13   5  -8  330.38    8.91
  13  -5  -8  324.26    9.60
  11   5  -6  173.03    6.10
  11  -5  -6  179.24    6.80
   9   5  -4  267.12    7.42
   9  -5  -4  268.60    7.87
   7   5  -2  614.75   12.70
   7  -5  -2  606.18   12.66
   5   5   0  282.33    7.06
   5  -5   0  272.22    6.90
  -5   5   0  273.72    5.70
   3  -5   2  339.53    7.34
   3  -5   2  337.05   10.07
  -3   5  -2  338.14    7.34
   1  -5   4    4.45    1.65
  -1  -5  -4    5.57    2.33
   1  -5   4    5.60    3.35
  -1   5  -4    5.81    2.14
  -1  -5  -4    5.94    2.10
   1  -5  -6  354.39    8.32
   1  -5  -6  362.16    8.39
   1   5  -6  349.44    8.67
  -1  -5   6  347.63   11.07
   3  -5  -8  592.35   12.58
  -3  -5   8  601.79   16.21
   3  -5  -8  601.49   12.77
   3   5  -8  597.38   13.31
   5   5 -10  155.46    4.53
   5  -5 -10  148.56    6.05
   5   5 -10  147.51    6.80
   5  -5 -10  147.79    6.20
   7  -5 -12   -3.81    3.31
   7  -5 -12    0.42    3.17
   7   5 -12   -2.10    3.39
   7   5 -12    1.19    2.30
   9  -5 -14    4.57    3.97
   9  -5 -14    2.80    3.76
   9   5 -14    0.45    3.91
  11  -5 -16  209.80    8.84
  11   5 -16  191.28    9.26
  11  -5 -16  198.51    8.70
  13  -5 -18    1.38    4.35
  13   5 -18    2.09    4.72
  13  -5 -18    7.49    4.85
  15  -5 -20   10.18    5.60
  15   5 -20    6.82    5.37
  17   5 -22   16.11    6.05
  19   5 -24    2.37    6.24
  24  -6 -19   63.04    7.71
  22   6 -17    0.38    5.14
  22  -6 -17   -6.83    5.61
  22   6 -17    5.99    4.79
  20   6 -15    0.31    4.77
  20  -6 -15    1.17    5.19
  20   6 -15    0.53    4.16
  18   6 -13   21.98    4.35
  18   6 -13   26.63    4.90
  18  -6 -13   30.98    5.47
  16   6 -11    2.93    4.43
  16   6 -11   -2.25    3.59
  16  -6 -11   -5.41    4.64
  14   6  -9   82.80    6.05
  14  -6  -9   91.41    6.89
  12  -6  -7    3.41    3.66
  12   6  -7    8.85    2.93
  10   6  -5   36.87    3.34
  10  -6  -5   37.31    3.86
   8  -6  -3  151.40    6.14
   8   6  -3  140.09    5.77
   6  -6  -1  299.65    7.75
   6   6  -1  305.70    7.80
   4  -6   1 1195.81   26.61
  -4   6  -1 1248.87   22.59
   4  -6   1 1242.15   22.78
   4   6   1 1243.59   23.36
   2  -6   3  823.33   19.50
  -2   6  -3  834.74   16.24
   2  -6   3  859.24   15.86
  -2  -6  -3  838.10   16.43
  -2  -6  -3  854.23   16.55
   0  -6   5  995.81   23.32
   0  -6   5 1072.49   18.85
   0  -6  -5 1028.14   19.72
   0  -6  -5 1037.09   19.75
   0   6  -5 1007.82   19.88
  -2  -6   7  783.66   19.74
   2  -6  -7  790.09   15.85
   2   6  -7  792.14   16.42
   2  -6  -7  792.39   15.89
   4  -6  -9   12.11    3.15
   4   6  -9   11.70    3.28
   4  -6  -9   14.34    2.88
   6   6 -11  275.71    6.66
   6   6 -11  281.31    8.78
   6  -6 -11  265.85    8.13
   6  -6 -11  275.66    8.37
   8   6 -13  179.86    8.28
   8  -6 -13  179.75    7.70
   8  -6 -13  182.57    7.30
  10   6 -15  353.38   11.81
  10  -6 -15  368.92   10.80
  10  -6 -15  362.24   10.97
  12  -6 -17   -2.56    4.93
  12  -6 -17   -1.85    4.30
  12   6 -17   -0.57    4.60
  14   6 -19   -1.04    5.13
  14  -6 -19   -5.85    4.67
  14  -6 -19    4.78    5.42
  16   6 -21   50.10    6.85
  16  -6 -21   64.28    7.13
  18   6 -23    0.40    6.15
  20   6 -25    7.39    7.02
  23   7 -18   98.12    8.38
  23   7 -18   94.17    8.75
  23  -7 -18  101.55    9.47
  21   7 -16    5.56    5.17
  21   7 -16    6.92    4.67
  21  -7 -16    6.08    5.88
  19  -7 -14  474.99   13.74
  19   7 -14  453.69   12.94
  19   7 -14  471.62   12.95
  17   7 -12   11.74    4.02
  17   7 -12    7.14    4.42
  17  -7 -12   10.19    5.01
  15   7 -10  167.03    7.66
  15  -7 -10  178.34    8.84
  13  -7  -8  906.60   19.17
  13   7  -8  861.67   18.44
  11   7  -6  186.38    6.74
  11  -7  -6  185.34    7.40
   9  -7  -4   80.33    5.41
   9   7  -4   73.43    5.11
   7  -7  -2   36.47    3.50
   7   7  -2   36.94    3.32
   5  -7   0  375.47   11.42
   5  -7   0  389.22    9.16
   5   7   0  413.42    9.38
  -5   7   0  397.90    8.10
   3  -7   2   13.24    3.74
   3  -7   2   12.52    2.59
  -3   7  -2   14.93    2.30
   3   7   2   13.80    2.95
   1  -7   4 1063.93   24.35
  -1  -7  -4 1072.24   20.63
  -1   7  -4 1045.27   20.60
  -1  -7  -4 1093.05   20.72
   1  -7   4 1099.08   19.91
   1  -7  -6  155.20    5.88
   1  -7  -6  163.80    6.26
   1   7  -6  151.11    5.98
  -1  -7   6  154.25    8.62
   3   7  -8   78.07    5.43
   3  -7  -8   78.94    4.78
   3  -7  -8   79.11    5.29
  -3  -7   8   86.01    8.35
   5   7 -10  110.79    6.46
   5  -7 -10  104.24    5.57
   5  -7 -10  102.16    6.18
   7  -7 -12  124.76    7.00
   7   7 -12  135.14    7.10
   7  -7 -12  121.02    6.38
   9  -7 -14  468.35   12.59
   9   7 -14  477.96   13.46
   9  -7 -14  460.76   12.04
  11   7 -16   -6.58    4.58
  11  -7 -16    1.75    5.00
  11  -7 -16   -1.54    4.17
  13  -7 -18   34.76    5.19
  13   7 -18   33.75    5.84
  13  -7 -18   32.45    6.01
  15  -7 -20   32.89    6.37
  15   7 -20   30.13    6.37
  17   7 -22   48.68    7.23
  19   7 -24   32.67    7.47
  24   8 -19  124.40    9.83
  24  -8 -19  116.79   10.43
  22  -8 -17   52.62    7.24
  22   8 -17   53.17    6.20
  22   8 -17   49.24    6.26
  20   8 -15   10.55    5.00
  20  -8 -15   12.04    6.01
  20   8 -15    8.54    4.83
  18  -8 -13   22.86    5.63
  18   8 -13   27.27    4.77
  18   8 -13   31.19    5.02
  16   8 -11    8.50    4.08
  16  -8 -11   13.55    5.19
  14  -8  -9   13.00    4.82
  14   8  -9   15.47    4.03
  12   8  -7  102.88    6.08
  12  -8  -7  126.06    7.09
  10  -8  -5  459.14   11.45
  10   8  -5  453.06   11.10
   8  -8  -3 1246.23   24.21
   8   8  -3 1256.51   24.45
   6  -8  -1  933.60   22.19
   6   8  -1  976.14   19.10
  -6   8   1  971.30   17.71
   6  -8  -1  952.37   18.87
   4  -8   1 1575.84   34.25
  -4   8  -1 1630.84   29.30
   4   8   1 1604.02   30.09
   4  -8   1 1606.26   29.57
   2   8   3  239.74    7.66
  -2   8  -3  254.15    6.85
   2  -8   3  260.90    6.75
   2  -8   3  236.44    9.52
  -2  -8  -3  252.26    7.42
   0  -8  -5  587.71   12.90
   0  -8   5  583.59   16.21
   0  -8  -5  583.68   12.47
   0   8  -5  561.53   12.56
   0  -8   5  603.37   11.85
  -2  -8   7  379.86   12.88
   2   8  -7  388.83   10.04
   2  -8  -7  408.32    9.94
   2  -8  -7  394.03    9.43
   4  -8  -9   12.62    3.87
   4   8  -9   14.35    3.61
   4  -8  -9   17.80    3.28
   6  -8 -11  407.63   10.35
   6  -8 -11  402.38   10.95
   6   8 -11  406.12   11.27
   8  -8 -13  297.04   10.02
   8  -8 -13  287.36    9.06
   8   8 -13  296.52   10.45
  10  -8 -15    0.71    5.37
  10   8 -15   -7.37    4.61
  10  -8 -15   -1.60    4.05
  12  -8 -17  193.04    9.25
  12  -8 -17  174.29    8.10
  12   8 -17  184.80    9.82
  14   8 -19  371.49   13.05
  16   8 -21   -5.81    5.93
  16  -8 -21    3.76    6.37
  18   8 -23   11.11    6.84
  23  -9 -18    6.61    6.82
  23   9 -18    9.97    5.52
  21   9 -16    7.64    5.10
  21  -9 -16   -5.58    5.89
  21   9 -16    1.58    4.89
  19  -9 -14  112.47    8.79
  19   9 -14   97.99    7.60
  19   9 -14  110.44    7.70
  17   9 -12  215.52    8.76
  17  -9 -12  228.21    9.78
  15   9 -10  365.36   11.01
  15  -9 -10  391.65   11.84
  13   9  -8   89.38    6.41
  13  -9  -8  108.28    7.56
  11  -9  -6   13.25    4.50
  11   9  -6   10.72    3.63
   9   9  -4  496.97   12.06
   9  -9  -4  511.36   12.36
   7  -9  -2 1620.26   35.64
   7   9  -2 1645.80   31.38
  -7   9   2 1683.11   29.84
   7  -9  -2 1668.20   31.13
   5   9   0   32.15    3.42
   5  -9   0   27.65    4.69
   5  -9   0   32.83    3.57
  -5   9   0   31.76    2.40
   3  -9   2   28.05    4.89
  -3  -9  -2   26.85    3.69
   3   9   2   28.34    3.39
   3  -9   2   26.03    3.24
  -3   9  -2   18.82    2.57
   1   9   4   11.80    3.42
   1  -9   4   14.46    2.80
  -1  -9  -4    7.36    3.33
  -1   9  -4   14.92    2.83
   1  -9   4   15.06    4.54
   1   9  -6 1643.24   31.06
  -1  -9   6 1593.38   35.90
   1  -9  -6 1646.70   30.59
  -1  -9   6 1644.43   29.74
   1  -9  -6 1628.17   30.83
  -3  -9   8  450.63   14.90
   3  -9  -8  460.89   10.89
   3  -9  -8  475.18   11.58
   3   9  -8  460.36   11.63
   5   9 -10    0.39    3.76
   5  -9 -10   -2.08    4.08
   5  -9 -10   -2.22    3.33
   7   9 -12   -4.54    4.22
   7  -9 -12   -4.72    3.46
   7  -9 -12    2.80    4.90
   9  -9 -14   99.65    8.13
   9  -9 -14  115.12    7.06
   9   9 -14   99.82    8.18
  11   9 -16  548.21   15.56
  11  -9 -16  576.97   14.97
  11  -9 -16  549.97   13.80
  13   9 -18    1.15    5.66
  13  -9 -18   10.73    6.27
  15   9 -20   -2.03    5.71
  15  -9 -20   -1.44    6.61
  17   9 -22   67.34    8.00
  17  -9 -22   69.88    8.55
  22  10 -17   16.49    5.59
  22 -10 -17   11.25    6.77
  20 -10 -15   67.35    7.50
  20  10 -15   73.93    6.42
  20  10 -15   78.15    7.45
  18  10 -13   36.13    5.33
  18 -10 -13   29.41    6.26
  16 -10 -11  136.68    8.51
  16  10 -11  137.33    7.55
  14 -10  -9    8.59    5.20
  14  10  -9    8.42    4.15
  12 -10  -7  226.43    9.19
  12  10  -7  226.72    8.33
  10  10  -5 1806.42   35.27
  10 -10  -5 1890.39   35.34
   8 -10  -3  183.56    9.21
   8  10  -3  167.51    7.25
   8 -10  -3  182.90    7.43
   6 -10  -1  160.90    6.88
   6 -10  -1  170.02    8.88
  -6  10   1  166.39    4.91
   6  10  -1  170.64    6.83
   4 -10   1  796.63   19.93
   4  10   1  799.74   16.71
  -4  10  -1  793.10   15.68
   4 -10   1  807.77   16.40
   2 -10   3   14.74    3.23
   2  10   3   21.32    3.50
  -2 -10  -3   11.93    3.69
   2 -10   3   13.84    4.49
  -2  10  -3   18.08    2.89
   0 -10   5   -1.28    2.79
   0  10   5   -2.72    3.48
   0 -10  -5    1.28    3.65
   0 -10   5    4.88    4.79
   0  10  -5   -1.73    2.93
   2  10  -7  142.05    6.49
   2 -10  -7  138.25    6.02
   2 -10  -7  146.06    7.03
  -2 -10   7  142.97    9.65
   4 -10  -9   21.09    4.65
   4  10  -9   18.52    4.19
   4 -10  -9   23.33    3.72
   6 -10 -11   15.39    4.00
   6  10 -11   17.85    4.67
   6 -10 -11   14.97    5.11
   8 -10 -13  246.39   10.01
   8  10 -13  243.52   10.15
   8 -10 -13  244.73    8.78
  10  10 -15  280.03   10.98
  10 -10 -15  267.23   10.49
  10 -10 -15  264.21    9.13
  12 -10 -17  260.10   10.80
  12  10 -17  268.64   11.24
  14  10 -19  310.44   12.70
  14 -10 -19  310.72   12.19
  16  10 -21  227.40   11.56
  16 -10 -21  201.06   11.44
  18 -10 -23   10.10    8.32
  18  10 -23   22.84    7.43
  23  11 -18   11.81    5.89
  21  11 -16    4.98    5.37
  21 -11 -16    1.22    6.62
  19 -11 -14   35.30    6.75
  19  11 -14   43.33    5.93
  17 -11 -12   37.16    6.44
  17  11 -12   45.95    5.44
  15 -11 -10   20.03    5.57
  15  11 -10   20.98    4.68
  13  11  -8    2.09    4.04
  13 -11  -8    4.41    5.26
  11 -11  -6   85.12    7.43
  11  11  -6   72.23    6.41
   9 -11  -4  345.37   10.42
   9 -11  -4  356.25   12.40
   9  11  -4  337.98   10.13
   7 -11  -2   61.71    5.96
   7 -11  -2   70.60    6.51
   7  11  -2   74.04    6.15
  -5  11   0   69.01    4.17
   5  11   0   73.41    5.74
   5 -11   0   75.90    7.13
   5 -11   0   73.74    5.96
  -3  11  -2  575.42   12.45
   3  11   2  589.25   13.34
   3 -11   2  598.88   13.01
   3 -11   2  586.85   16.18
  -3 -11  -2  578.75   13.55
   1  11   4  353.55    9.66
  -1  11  -4  330.24    9.04
   1 -11   4  345.11   12.48
   1 -11   4  365.40    9.10
  -1 -11  -4  363.17    9.91
  -1 -11   6   29.29    3.64
   1 -11  -6   30.03    4.60
  -1 -11   6   26.83    5.90
   1  11  -6   28.17    3.83
  -1  11   6   39.77    4.56
   3  11  -8  317.92    9.99
  -3 -11   8  323.06   14.42
   3 -11  -8  331.74   10.20
   3 -11  -8  338.74    9.30
   5 -11 -10  114.54    7.77
   5  11 -10  106.80    7.46
   5 -11 -10  111.20    6.49
   7 -11 -12   30.47    5.92
   7  11 -12   31.00    5.52
   7 -11 -12   37.87    4.77
   9 -11 -14   39.70    6.18
   9  11 -14   45.60    6.13
   9 -11 -14   48.51    5.04
  11 -11 -16    5.56    6.08
  11  11 -16    5.18    5.49
  13  11 -18   48.50    7.04
  13 -11 -18   49.77    7.22
  15  11 -20   17.22    6.98
  15 -11 -20   14.09    7.44
  17  11 -22   58.54    8.21
  17 -11 -22   52.85    8.76
  22  12 -17  116.25    9.47
  20 -12 -15   -0.34    6.44
  20  12 -15    5.66    5.38
  18  12 -13  166.53    8.78
  18 -12 -13  161.81    9.64
  16  12 -11  251.13    9.89
  16 -12 -11  284.75   10.87
  14 -12  -9   27.33    5.91
  14  12  -9   20.54    4.65
  12  12  -7    1.10    4.02
  12 -12  -7    5.32    5.34
  10 -12  -5   35.99    6.14
  10  12  -5   32.94    4.86
  10 -12  -5   31.95    5.65
   8 -12  -3   85.43    7.43
   8  12  -3   83.20    6.30
   8 -12  -3   84.78    8.25
   6 -12  -1  223.78   10.36
   6 -12  -1  223.60    8.54
   6  12  -1  225.70    8.33
   4  12   1  188.43    7.68
   4 -12   1  211.96   10.38
   4 -12   1  216.12    7.95
  -4  12  -1  202.69    6.34
  -2 -12  -3  135.23    7.27
   2  12   3  133.89    6.66
   2 -12   3  142.21    9.85
  -2  12  -3  127.28    5.96
   2 -12   3  138.78    6.69
   0 -12   5    0.55    3.62
   0 -12  -5    6.35    4.39
   0 -12   5    3.74    5.36
   0  12  -5   -1.45    3.44
   0  12   5    1.41    3.99
  -2 -12   7  216.72   11.75
  -2  12   7  222.78    8.69
   2 -12  -7  212.89    8.79
   2  12  -7  223.30    8.40
   4  12  -9   -0.44    4.26
   4 -12  -9    3.62    3.92
   4 -12  -9    0.34    4.97
   6  12 -11   14.95    5.12
   6 -12 -11   14.19    4.14
   6 -12 -11   20.65    5.84
   8 -12 -13   35.16    4.75
   8  12 -13   32.00    5.85
   8 -12 -13   40.80    6.33
  10 -12 -15   28.91    6.49
  10  12 -15   40.92    6.39
  12 -12 -17  136.58    9.66
  12  12 -17  132.63    9.47
  14  12 -19   17.49    6.71
  14 -12 -19   11.91    7.05
  16  12 -21    7.48    7.02
  16 -12 -21   -0.11    7.80
  21  13 -16   30.14    6.51
  21 -13 -16   24.67    7.78
  19  13 -14    9.75    5.43
  19 -13 -14    9.10    6.64
  17 -13 -12   37.15    6.89
  17  13 -12   51.45    5.96
  15 -13 -10   48.21    6.72
  15  13 -10   46.10    5.59
  13 -13  -8   48.13    6.30
  13  13  -8   44.71    5.17
  11 -13  -6  154.50    8.67
  11  13  -6  146.72    7.38
  11 -13  -6  167.33   10.78
   9 -13  -4   57.29    6.24
   9  13  -4   48.12    5.30
   9 -13  -4   58.71    6.56
   7 -13  -2   -1.88    5.08
   7  13  -2   -4.47    4.09
   7 -13  -2    3.18    5.31
   5 -13   0  286.39    9.57
   5 -13   0  295.94   12.07
   5  13   0  274.38    9.37
  -3  13  -2   -2.68    3.07
   3  13   2    1.67    3.95
   3 -13   2   -3.95    5.58
   3 -13   2    2.61    4.34
  -3 -13  -2    3.10    4.65
  -1  13  -4    1.44    3.48
   1 -13   4    2.25    4.19
   1 -13   4    9.26    6.21
   1  13   4   -0.33    3.96
  -1 -13  -4   -4.03    4.61
   1  13  -6   -1.63    3.95
  -1 -13   6    5.84    6.40
  -1  13   6    5.95    4.39
  -1 -13   6    2.71    4.11
   1 -13  -6    2.78    5.03
  -3 -13   8  144.05   13.42
   3 -13  -8  142.96    8.42
  -3  13   8  133.34    7.93
   3  13  -8  132.49    7.86
   5 -13 -10  188.02    9.16
   5  13 -10  191.56    9.08
   5 -13 -10  198.92    7.81
   7  13 -12   33.66    5.82
   7 -13 -12   23.60    6.17
   7 -13 -12   32.62    4.64
   9 -13 -14   28.50    6.50
   9  13 -14   29.27    6.14
  11  13 -16    7.80    6.05
  11 -13 -16    4.26    6.34
  13  13 -18  237.44   11.61
  13 -13 -18  222.82   11.27
  15  13 -20  178.48   11.39
  15 -13 -20  178.07   11.56
  20 -14 -15    3.86    7.34
  20  14 -15   16.25    5.99
  18  14 -13   36.33    5.98
  18 -14 -13   29.84    7.35
  16 -14 -11   73.17    7.68
  16  14 -11   82.79    7.55
  14  14  -9   74.12    6.99
  14 -14  -9   72.00    7.33
  12  14  -7   72.70    6.68
  12 -14  -7   60.08    6.79
  10 -14  -5   86.62    7.02
  10 -14  -5   91.92    9.12
  10  14  -5   83.67    6.90
   8  14  -3   -2.04    4.29
   8 -14  -3    1.54    5.49
   8 -14  -3    3.86    5.64
   6  14  -1    7.09    4.64
   6 -14  -1   28.77    5.67
   6 -14  -1   32.72    6.48
   4 -14   1    4.28    5.10
   4 -14   1    6.58    6.09
   4  14   1   19.47    4.65
   2 -14   3  124.04   10.73
   2 -14   3  129.14    7.41
   2  14   3  120.37    7.36
  -2  14  -3  112.55    6.35
  -2 -14  -3  118.80    7.96
   0 -14   5  112.45    7.06
   0 -14  -5   98.15    7.73
   0 -14   5  103.68   10.15
   0  14  -5   85.10    6.39
   0  14   5  100.95    6.85
   2  14  -7    2.38    4.30
  -2 -14   7   -6.53    7.06
  -2  14   7   -5.24    4.21
   2 -14  -7   -0.86    5.25
  -4  14   9   59.05    5.59
   4  14  -9   58.70    5.87
   4 -14  -9   50.96    6.36
   6  14 -11   29.27    5.74
   6 -14 -11   21.60    6.03
   8  14 -13   18.53    5.89
   8 -14 -13   14.19    6.46
  10  14 -15   20.17    6.39
  10 -14 -15   25.68    6.95
  12 -14 -17    0.86    6.96
  12  14 -17    3.60    6.36
  14 -14 -19    8.66    7.64
  14  14 -19    0.23    6.66
  16 -14 -21   -5.36    8.18
  19  15 -14   91.80    8.56
  19 -15 -14   57.08    8.60
  17  15 -12  178.87    9.43
  17 -15 -12  153.50   10.38
  15  15 -10   81.98    7.53
  15 -15 -10   63.84    7.64
  13 -15  -8   34.37    6.97
  13  15  -8   54.08    5.75
  11  15  -6  255.06    9.49
  11 -15  -6  250.27   10.47
   9 -15  -4  399.26   12.04
   9  15  -4  357.74   11.23
   7  15  -2   58.74    5.57
   7 -15  -2   76.90    6.56
   7 -15  -2   64.12    8.00
   5  15   0  616.36   15.39
   5 -15   0  641.06   15.53
   5 -15   0  669.92   19.48
   3  15   2  340.35   10.50
   3 -15   2  354.08   10.67
   3 -15   2  344.16   13.74
   1 -15   4   12.84    4.98
  -1 -15  -4   13.37    5.54
   1  15   4   18.27    4.62
   1 -15   4   15.80    7.41
  -1  15  -4   19.08    4.05
   1  15  -6    9.75    4.23
  -1  15   6    2.65    4.33
   1 -15  -6   13.64    5.51
  -1 -15   6   -1.11    7.87
   3  15  -8   76.72    6.83
  -3  15   8   77.19    6.82
   3 -15  -8   84.36    7.79
  -5  15  10    0.40    4.65
   5 -15 -10   -0.60    5.74
   5  15 -10    6.78    4.94
   7 -15 -12   16.98    6.39
   7  15 -12   26.48    6.10
   9  15 -14  197.17   10.33
   9 -15 -14  182.45   10.40
  11  15 -16    1.20    5.99
  11 -15 -16   -0.13    7.07
  13  15 -18    8.80    6.72
  13 -15 -18   -4.81    7.46
  15 -15 -20    9.19    8.38
  18  16 -13   57.49    6.89
  18 -16 -13   30.31    8.21
  16  16 -11   22.13    5.79
  16 -16 -11   11.83    7.24
  14  16  -9   47.26    6.01
  14 -16  -9   27.54    7.07
  12  16  -7   82.05    7.15
  12 -16  -7   86.08    7.98
  10  16  -5   51.28    5.65
  10 -16  -5   45.87    6.93
   8 -16  -3    9.90    6.03
   8  16  -3   20.22    5.08
   6 -16  -1   13.43    5.84
   6  16  -1   23.64    5.05
   6 -16  -1   28.17    7.46
   4 -16   1   96.96    8.74
   4 -16   1   94.27    7.49
   4  16   1   97.03    7.20
   2  16   3   42.47    5.22
   2 -16   3   38.87    7.40
  -2 -16  -3   39.15    6.03
   2 -16   3   35.00    5.60
   0 -16   5   46.21    5.55
   0  16   5   50.14    5.19
   0 -16   5   42.84    8.88
   0  16  -5   43.99    4.69
   0 -16  -5   38.54    6.14
   2 -16  -7   14.52    5.82
  -2 -16   7   -8.30    8.43
  -2  16   7    9.10    4.51
   2  16  -7   13.59    4.66
   4 -16  -9   23.14    6.28
   4  16  -9   29.32    5.36
  -4  16   9   31.56    5.12
   6  16 -11  113.69    8.71
   6 -16 -11  106.01    8.97
   8 -16 -13    3.47    6.65
   8  16 -13    4.21    5.82
  10 -16 -15   42.00    7.82
  10  16 -15   53.19    7.36
  12  16 -17    8.58    6.83
  12 -16 -17   -4.10    7.64
  17  17 -12   45.34    6.67
  17 -17 -12   19.49    8.15
  15 -17 -10  221.36   11.71
  15  17 -10  223.85   10.28
  13  17  -8  139.01    8.32
  13 -17  -8  112.70    9.90
  11  17  -6  196.71    8.96
  11 -17  -6  182.89   10.34
   9  17  -4  276.25    9.99
   9 -17  -4  240.31   10.80
   7  17  -2    7.99    4.90
   7 -17  -2   -2.72    5.81
   5 -17   0   16.55    5.85
   5  17   0   17.07    5.16
   3  17   2   25.65    5.15
   3 -17   2   15.62    5.63
   3 -17   2   14.75    7.63
   1  17   4   10.19    4.68
   1 -17   4    3.21    5.23
   1 -17   4    6.00    8.02
  -1 -17  -4    4.82    5.75
  -1  17   6   22.71    4.90
   1 -17  -6   24.15    6.30
  -1 -17   6    6.88    9.44
   1  17  -6   24.77    4.68
  -3  17   8   27.04    4.95
   3  17  -8   36.28    5.49
   3 -17  -8   26.86    6.57
   5 -17 -10    2.07    6.31
   5  17 -10   -1.25    4.98
   7 -17 -12    7.09    6.81
   7  17 -12   14.30    5.94
   9  17 -14   53.18    7.43
   9 -17 -14   30.36    7.50
  11 -17 -16    5.23    7.65
  11  17 -16   13.77    6.86
  16 -18 -11    6.56    8.12
  16  18 -11   25.07    6.44
  14  18  -9   27.97    6.19
  14 -18  -9   23.00    7.66
  12 -18  -7   11.29    7.06
  12  18  -7   16.65    5.44
  10 -18  -5    8.99    6.70
  10  18  -5    7.83    5.09
   8  18  -3  111.07    7.80
   8 -18  -3  102.25    8.96
   6 -18  -1   87.43    8.23
   6  18  -1   88.00    7.42
   4  18   1   -1.27    4.98
   4 -18   1    8.13    5.73
  -2 -18  -3   10.90    6.29
   2  18   3   12.83    5.06
   2 -18   3   17.55    5.79
   0 -18   5   19.29    8.79
   0  18   5   26.78    5.29
   0 -18  -5   22.01    6.44
   2  18  -7   15.24    4.97
   2 -18  -7   11.61    6.38
  -2  18   7   13.35    4.93
   4 -18  -9    3.92    6.57
   4  18  -9    9.99    5.30
   6  18 -11   46.40    6.43
   6 -18 -11   37.03    7.43
   8  18 -13  131.16    9.53
   8 -18 -13   94.95    9.01
  10 -18 -15    0.78    7.80
  10  18 -15    2.13    6.68
  15 -19 -10   -1.65    8.03
  13  19  -8   28.25    6.01
  13 -19  -8    0.95    7.61
  11  19  -6   17.52    5.53
  11 -19  -6   -1.36    7.17
   9  19  -4   52.57    6.06
   9 -19  -4   34.38    7.36
   7  19  -2   23.86    5.61
   7 -19  -2   23.87    6.97
   5  19   0   46.58    5.88
   5 -19   0   35.32    6.77
   3  19   2  164.58    8.54
   3 -19   2  156.04    9.05
  -1 -19  -4   13.35    6.43
   1  19   4   20.91    5.25
   1 -19  -6   -2.53    6.29
   3 -19  -8   -0.96    6.58
   3  19  -8   14.02    5.17
   5  19 -10  221.13   10.08
   5 -19 -10  168.10   10.74
   7  19 -12   36.16    6.83
   7 -19 -12   24.03    7.82
   9 -19 -14    2.29    7.74
   9  19 -14   11.79    6.86
  12 -20  -7   43.77    8.62
  12  20  -7   60.76    6.74
  10  20  -5   48.09    6.07
  10 -20  -5   21.05    7.69
   8 -20  -3  108.16    9.51
   8  20  -3  118.53    7.97
   6  20  -1   11.16    5.33
   6 -20  -1   20.87    6.93
   4 -20   1   -1.92    6.16
   4  20   1   15.63    5.47
   2  20   3   17.54    5.40
   0 -20  -5  119.74    9.46
   2 -20  -7   80.06    8.37
   4  20  -9   24.63    5.58
   4 -20  -9    3.53    7.03
   6  20 -11   29.10    6.52
   6 -20 -11   10.93    7.85
   8  20 -13   33.68    7.08
  11 -21  -6   34.54    8.39
   9  21  -4  107.65    8.28
   9 -21  -4   74.68    9.06
   7  21  -2   36.60    5.99
   7 -21  -2   24.30    7.53
   5  21   0   52.49    6.38
   5 -21   0   32.80    7.52
   3  21   2   27.30    5.88
   1 -21  -6  181.37   10.81
   3 -21  -8   -1.00    7.46
   5  21 -10  100.28    9.01
   5 -21 -10   70.15    9.00
   7  21 -12   21.94    6.95
  10 -22  -5   60.19    9.24
   8 -22  -3   48.63    8.70
   8  22  -3   57.93    6.64
   6  22  -1   20.28    6.02
   6 -22  -1   -1.17    7.37
   4  22   1   19.53    5.96
   0 -22  -5   40.69    8.44
   2 -22  -7   35.41    8.29
   5  23   0   42.57    6.59
  26   0 -20    4.76    6.16
  24   0 -18   11.48    5.70
  22   0 -16  138.77    8.54
  20   0 -14  145.12    8.26
  18   0 -12  358.68   11.12
  16   0 -10  446.74   12.24
  16   0 -10  471.37   10.96
  14   0  -8 1221.26   23.42
  14   0  -8 1232.72   24.35
  12   0  -6 1099.79   20.89
  12   0  -6 1118.65   21.85
  10   0  -4 1027.30   18.69
  10   0  -4  964.42   19.49
   8   0  -2  120.04    3.81
   8   0  -2  114.35    4.73
  -4   0  -2 5664.10  101.37
  -2   0  -4 9225.97  165.89
   2   0   4 9347.77  184.06
   0   0   6 2539.68   50.27
   0   0  -6 2487.91   45.45
   2   0  -8   46.10    4.16
  -2   0   8   50.22    4.15
   2   0  -8   44.25    2.67
   4   0 -10   40.54    3.32
   4   0 -10   42.83    3.69
   6   0 -12  252.00    8.27
   6   0 -12  254.84    6.52
   8   0 -14  122.84    5.42
   8   0 -14  113.31    6.74
  10   0 -16   72.51    5.71
  10   0 -16   67.04    5.62
  12   0 -18   16.65    4.87
  14   0 -20   36.27    5.77
  16   0 -22  535.37   15.75
  18   0 -24   88.70    7.96
  25   1 -19   -1.26    5.69
  25  -1 -19    7.83    5.76
  23   1 -17  151.56    8.96
  23  -1 -17  150.24    8.87
  21   1 -15   63.70    6.03
  21  -1 -15   58.51    6.19
  19   1 -13    0.01    4.50
  19  -1 -13    0.85    4.62
  17  -1 -11  120.01    7.55
  17   1 -11  123.49    7.72
  17   1 -11  125.87    6.15
  15  -1  -9  457.97   10.41
  15   1  -9  452.33   10.66
  15   1  -9  462.80   11.95
  15  -1  -9  454.83   11.86
  13   1  -7  217.44    6.27
  13  -1  -7  210.94    7.72
  13  -1  -7  207.43    5.86
  13   1  -7  212.80    7.47
  11   1  -5   50.76    4.78
  11  -1  -5   51.34    3.80
  11  -1  -5   46.71    3.11
  11   1  -5   40.86    3.55
   9  -1  -3   69.26    4.81
   9  -1  -3   74.29    3.08
   9   1  -3   69.84    3.65
   7   1  -1   11.71    1.81
   7  -1  -1   13.73    1.44
   7  -1  -1   14.14    2.47
  -5   1  -1  328.95    6.86
  -5  -1  -1  321.66    7.19
   5  -1   1  328.19    7.44
  -3  -1  -3   21.78    2.32
   3  -1   3   23.99    3.20
  -3   1  -3   20.86    2.22
   1  -1   5  488.55   12.34
  -1   1  -5  484.18   10.45
  -1  -1  -5  492.80   10.46
   1   1   5  492.89   11.35
  -1   1   7   10.90    2.94
   1  -1  -7    5.85    2.30
  -1  -1   7    8.46    3.14
   1  -1  -7   10.12    1.77
   1   1  -7   10.76    2.60
   3   1  -9  116.26    3.43
   3  -1  -9  114.12    5.52
   3  -1  -9  116.43    4.15
   3   1  -9  120.99    5.67
   5  -1 -11    7.50    3.13
   5  -1 -11    5.65    2.35
   5   1 -11    5.61    3.12
   5   1 -11    8.86    2.01
   7   1 -13  188.78    7.61
   7   1 -13  193.11    5.83
   7  -1 -13  196.92    7.58
   7  -1 -13  184.04    6.22
   9  -1 -15  279.76    9.49
   9  -1 -15  274.42    8.11
   9   1 -15  275.51    7.83
   9   1 -15  275.18    9.54
  11   1 -17   -0.50    4.39
  11  -1 -17   -2.70    3.95
  11  -1 -17    7.34    4.52
  13  -1 -19   41.48    5.64
  13   1 -19   45.08    5.78
  15   1 -21   29.15    5.99
  15  -1 -21   36.77    6.05
  17  -1 -23   88.07    7.72
  17   1 -23   92.49    7.87
  19   1 -25  -12.89    5.97
  26   2 -20   15.37    6.28
  26  -2 -20   19.82    6.86
  24  -2 -18    9.15    5.66
  24   2 -18   16.44    5.74
  22  -2 -16   91.25    7.77
  22   2 -16   99.63    7.93
  20  -2 -14  119.46    7.97
  20   2 -14  122.07    7.69
  18  -2 -12   -1.61    4.43
  18   2 -12    2.35    3.17
  18   2 -12   -2.11    4.36
  16   2 -10   12.18    4.28
  16   2 -10    9.28    3.03
  16  -2 -10    9.80    4.32
  14  -2  -8  239.52    6.45
  14  -2  -8  232.63    8.27
  14   2  -8  238.44    7.00
  14   2  -8  234.85    8.03
  12   2  -6  196.40    6.90
  12   2  -6  196.74    5.94
  12  -2  -6  207.62    7.19
  12  -2  -6  197.23    5.29
  10  -2  -4  161.33    4.21
  10  -2  -4  164.56    6.27
  10   2  -4  165.97    5.35
   8   2  -2 1503.26   27.86
   8  -2  -2 1596.80   27.45
   8  -2  -2 1466.03   28.11
  -6   2   0    2.61    1.15
   6  -2   0   -1.14    2.19
   6   2   0   -0.75    1.92
   4  -2   2 2703.68   46.34
  -4   2  -2 2602.27   46.65
  -4  -2  -2 2547.14   46.74
   2   2   4  236.41    6.61
   2  -2   4  221.91    7.82
   2  -2   4  228.68    4.99
  -2   2  -4  228.68    6.01
  -2  -2  -4  225.93    6.13
   0   2   6  368.44    9.11
   0  -2  -6  376.53    7.81
   0   2  -6  373.46    8.76
   0  -2   6  365.23   10.44
   0  -2  -6  365.46    8.64
  -2  -2   8  541.50   14.38
   2   2  -8  563.02   12.39
   2  -2  -8  565.23   12.23
   2  -2  -8  567.54   11.10
   4  -2 -10  598.75   12.08
   4   2 -10  599.20   11.27
   4  -2 -10  586.69   13.11
   4   2 -10  597.81   13.46
   6   2 -12  149.45    4.76
   6  -2 -12  153.75    5.72
   6   2 -12  144.57    6.54
   6  -2 -12  142.96    6.55
   8  -2 -14  208.29    7.08
   8   2 -14  205.04    6.26
   8   2 -14  205.89    8.22
   8  -2 -14  200.75    7.95
  10   2 -16   23.15    4.75
  10  -2 -16   19.05    4.20
  10  -2 -16   14.26    4.51
  12  -2 -18    9.44    4.75
  12   2 -18   11.50    4.77
  14  -2 -20   60.50    6.18
  14   2 -20   68.86    6.59
  16   2 -22   25.54    6.06
  16  -2 -22   22.65    5.97
  18   2 -24   30.26    6.73
  20   2 -26   42.03    7.92
  25   3 -19    9.80    5.92
  25  -3 -19   13.19    6.33
  23   3 -17   82.61    6.87
  23  -3 -17   68.40    6.79
  21  -3 -15   11.70    5.20
  21   3 -15   17.30    5.21
  19  -3 -13    7.95    4.76
  19   3 -13    3.24    4.60
  19   3 -13    6.80    3.49
  17   3 -11   78.94    5.97
  17   3 -11   85.86    6.98
  17  -3 -11   87.08    7.29
  15  -3  -9   81.06    6.82
  15   3  -9   85.54    6.65
  15   3  -9   78.13    5.25
  13   3  -7   65.91    4.58
  13  -3  -7   78.56    3.61
  13  -3  -7   62.37    5.72
  13   3  -7   73.41    5.59
  11  -3  -5    4.98    1.38
  11   3  -5    6.90    2.31
  11  -3  -5    8.32    3.13
   9  -3  -3  469.05   10.77
   9   3  -3  480.29   10.31
   7  -3  -1  567.00   11.81
   7   3  -1  562.92   11.50
  -5   3  -1  147.31    3.85
   5  -3   1  147.70    4.76
   3  -3   3 1370.64   24.19
   3  -3   3 1314.27   28.26
  -3   3  -3 1358.25   24.70
  -3  -3  -3 1329.90   24.79
  -1   3  -5   28.39    2.63
  -1  -3  -5   25.92    2.33
   1   3   5   23.72    2.16
  -1  -3  -5   24.53    2.49
   1  -3   5   19.21    3.50
   1  -3  -7  763.95   14.63
  -1  -3   7  745.31   18.03
   1   3  -7  757.57   15.51
   1  -3  -7  766.90   15.25
   3  -3  -9  838.30   16.03
   3  -3  -9  819.38   16.92
  -3  -3   9  834.74   20.44
   3   3  -9  816.78   17.21
   5   3 -11   39.59    3.97
   5  -3 -11   43.81    3.32
   5  -3 -11   42.95    3.82
   5   3 -11   43.28    3.04
   7   3 -13  427.56   11.63
   7   3 -13  449.84    9.35
   7  -3 -13  430.52   10.33
   7  -3 -13  424.60   11.14
   9  -3 -15  112.27    6.59
   9   3 -15  110.53    7.31
   9  -3 -15  127.20    6.97
  11   3 -17   31.98    5.25
  11  -3 -17   34.15    5.04
  11  -3 -17   32.84    4.78
  13  -3 -19   13.65    4.84
  13   3 -19   17.25    5.10
  15  -3 -21   23.58    5.53
  15   3 -21   22.01    5.89
  17   3 -23    0.16    5.70
  19   3 -25   12.10    6.61
  26  -4 -20   22.29    6.95
  26   4 -20   13.44    6.36
  24   4 -18  115.05    8.50
  24  -4 -18  107.01    8.84
  22   4 -16  259.41   10.38
  22  -4 -16  262.33   10.57
  20   4 -14  105.20    7.66
  20   4 -14  108.70    7.13
  20  -4 -14  111.09    7.81
  18  -4 -12   60.04    5.79
  18   4 -12   64.70    5.71
  18   4 -12   64.80    4.83
  16  -4 -10   33.71    5.06
  16   4 -10   38.99    3.96
  16   4 -10   37.26    4.89
  14   4  -8  729.75   15.47
  14  -4  -8  729.48   16.33
  14   4  -8  721.72   15.96
  12  -4  -6   16.09    3.68
  12   4  -6   16.08    2.70
  10   4  -4  179.86    5.90
  10  -4  -4  166.12    6.46
   8  -4  -2   56.53    4.55
   8   4  -2   59.97    4.09
   6  -4   0  551.38   11.51
   6   4   0  567.50   11.65
  -4   4  -2   71.38    3.28
   4  -4   2   66.15    3.52
  -4  -4  -2   71.37    4.04
   4  -4   2   69.63    6.13
  -2  -4  -4    4.24    2.25
   2  -4   4    4.15    2.74
   2  -4   4    4.26    1.45
  -2   4  -4    2.62    2.07
  -2  -4  -4    5.11    2.05
   0  -4  -6  315.21    7.42
   0  -4   6  305.53   10.50
   0  -4  -6  302.26    7.54
   0   4  -6  315.48    7.88
   2  -4  -8   55.03    4.34
  -2  -4   8   64.56    5.33
   2   4  -8   58.96    5.04
   2  -4  -8   59.84    4.75
   4  -4 -10   50.99    3.77
   4  -4 -10   45.53    3.53
   4   4 -10   42.96    3.84
   6  -4 -12   53.60    4.27
   6   4 -12   55.08    4.54
   6   4 -12   57.73    3.65
   6  -4 -12   52.46    3.94
   8   4 -14  386.52   11.34
   8  -4 -14  386.04   10.24
   8  -4 -14  378.67   10.77
  10  -4 -16   -0.28    4.29
  10   4 -16    8.45    4.63
  10  -4 -16    3.96    4.33
  12   4 -18   80.74    7.59
  12  -4 -18   90.42    7.33
  12  -4 -18   80.58    7.37
  14   4 -20   -7.77    4.92
  14  -4 -20   -1.08    4.88
  16   4 -22   47.51    6.81
  18   4 -24   51.41    7.49
  25  -5 -19   19.37    6.72
  25   5 -19   10.70    5.90
  23   5 -17   19.19    5.77
  23  -5 -17   27.18    6.27
  21   5 -15   71.83    5.72
  21   5 -15   67.04    6.31
  21  -5 -15   77.69    6.84
  19   5 -13   57.37    4.94
  19   5 -13   69.64    5.87
  19  -5 -13   59.66    5.98
  17   5 -11   50.73    4.52
  17  -5 -11   48.04    5.66
  17   5 -11   53.26    5.36
  15   5  -9   77.26    5.84
  15  -5  -9   79.37    6.66
  13   5  -7  192.50    6.63
  13  -5  -7  208.99    7.81
  11   5  -5   43.59    3.42
  11  -5  -5   45.62    4.09
   9   5  -3   30.02    2.98
   9  -5  -3   34.39    3.53
   7  -5  -1  589.97   12.41
   7   5  -1  601.17   12.49
   5   5   1    2.61    2.36
   5  -5   1    3.14    2.29
   5  -5   1    0.30    3.38
  -5   5  -1    0.35    1.57
   3  -5   3   66.42    6.26
   3  -5   3   71.72    3.44
  -3   5  -3   74.05    3.73
  -3  -5  -3   72.87    3.96
   1  -5   5   91.90    3.13
  -1  -5  -5   88.85    4.51
   1  -5   5   95.02    6.83
  -1  -5  -5   90.91    4.60
  -1   5  -5   83.88    4.46
   1  -5  -7  377.65    8.92
   1   5  -7  366.00    9.38
   1  -5  -7  366.43    8.80
  -1  -5   7  368.25   11.76
  -3  -5   9 1571.95   35.09
   3  -5  -9 1628.73   29.75
   3   5  -9 1636.07   30.84
   3  -5  -9 1579.17   30.18
   5  -5 -11  190.34    6.70
   5   5 -11  191.32    4.91
   5   5 -11  181.45    7.53
   5  -5 -11  181.73    6.87
   7  -5 -13   22.99    4.07
   7   5 -13   22.55    4.24
   7  -5 -13   22.90    3.94
   9  -5 -15   -0.76    4.25
   9   5 -15   -2.22    4.28
   9  -5 -15   -1.44    3.98
  11   5 -17   66.11    6.20
  11  -5 -17   63.91    5.71
  11  -5 -17   66.24    5.69
  13  -5 -19  117.54    8.06
  13   5 -19   96.73    8.19
  13  -5 -19   89.40    7.79
  15  -5 -21   15.49    5.63
  15   5 -21   18.59    6.04
  17   5 -23   64.48    7.55
  19   5 -25   -1.59    6.47
  24  -6 -18   56.16    7.37
  24   6 -18   52.55    6.86
  22   6 -16   12.28    4.76
  22   6 -16    9.91    5.18
  22  -6 -16    5.26    5.71
  20   6 -14   44.67    5.12
  20   6 -14   35.66    5.54
  20  -6 -14   28.46    5.81
  18   6 -12   32.23    5.04
  18   6 -12   24.80    4.14
  18  -6 -12   24.48    5.23
  16  -6 -10  299.33   10.29
  16   6 -10  292.72    9.35
  14  -6  -8   46.48    4.97
  14   6  -8   42.19    4.01
  12   6  -6    2.52    2.85
  12  -6  -6   -4.30    3.56
  10   6  -4  150.28    5.95
  10  -6  -4  148.06    6.34
   8  -6  -2 1594.00   29.93
   8   6  -2 1623.49   30.11
   6  -6   0  616.31   12.72
   6   6   0  616.18   12.91
   4  -6   2   31.35    2.63
  -4   6  -2   29.80    2.32
   4  -6   2   30.02    4.15
   4   6   2   30.45    3.25
   2  -6   4  197.38    5.19
  -2  -6  -4  195.85    6.28
  -2   6  -4  187.87    5.83
  -2  -6  -4  190.57    6.02
   2  -6   4  186.58    8.52
   0  -6  -6  204.64    6.51
   0  -6  -6  209.85    6.45
   0   6  -6  213.17    6.68
   0  -6   6  207.08    9.17
   0  -6   6  216.88    5.08
   2  -6  -8 1943.36   36.02
  -2  -6   8 1905.83   41.48
   2   6  -8 1978.09   36.57
   2  -6  -8 1962.69   35.69
   4  -6 -10   43.69    3.74
   4  -6 -10   45.29    3.85
   4   6 -10   46.57    4.30
   6  -6 -12  324.55    9.21
   6  -6 -12  312.02    9.17
   6   6 -12  335.71   10.30
   8  -6 -14  105.01    6.66
   8  -6 -14  108.26    7.04
   8   6 -14  105.20    7.54
  10   6 -16  738.70   18.29
  10  -6 -16  760.75   17.46
  10  -6 -16  754.99   17.20
  12  -6 -18  129.57    8.09
  12   6 -18  115.65    8.42
  12  -6 -18  124.28    8.00
  14  -6 -20   10.14    5.25
  14  -6 -20   11.42    5.66
  14   6 -20   10.60    5.79
  16   6 -22   58.82    7.35
  18   6 -24   39.60    7.56
  25  -7 -19   22.48    7.44
  23   7 -17   13.94    5.78
  23  -7 -17   14.83    6.36
  23   7 -17   24.30    5.47
  21  -7 -15  154.94    9.26
  21   7 -15  153.05    8.59
  21   7 -15  163.34    8.54
  19   7 -13    5.95    4.82
  19  -7 -13    6.95    5.38
  19   7 -13   15.13    4.38
  17  -7 -11   -4.08    4.68
  17   7 -11   -0.54    3.61
  15   7  -9   85.90    6.20
  15  -7  -9   98.59    7.54
  13  -7  -7   25.45    4.55
  13   7  -7   27.86    3.69
  11   7  -5    9.94    3.11
  11  -7  -5    8.96    3.70
   9   7  -3  106.00    5.47
   9  -7  -3   97.26    5.65
   7   7  -1  119.37    5.47
   7  -7  -1  116.15    5.55
   5  -7   1   69.11    4.67
   5   7   1   73.52    5.01
   5  -7   1   68.48    5.18
  -5   7  -1   67.23    3.47
  -3   7  -3  196.36    5.96
   3  -7   3  224.83    9.45
   3  -7   3  206.82    5.97
  -1   7  -5  388.36    9.47
   1  -7   5  393.27   12.27
   1  -7   5  401.15    8.44
  -1  -7  -5  401.01    9.64
  -1  -7  -5  397.22    9.41
   1  -7  -7  452.91   10.53
   1  -7  -7  463.97   10.61
   1   7  -7  455.24   10.89
  -1  -7   7  445.90   13.84
   3  -7  -9  168.96    6.14
   3   7  -9  142.49    6.66
   3  -7  -9  149.61    6.47
  -3  -7   9  148.62    9.56
   5  -7 -11  321.68    9.23
   5   7 -11  319.46    9.82
   5  -7 -11  310.72    8.86
   7  -7 -13  233.47    8.67
   7  -7 -13  235.07    8.26
   7   7 -13  241.21    9.43
   9  -7 -15  180.25    8.63
   9  -7 -15  174.54    8.04
   9   7 -15  187.92    9.37
  11   7 -17   49.81    6.14
  11  -7 -17   49.87    5.34
  11  -7 -17   44.57    5.81
  13  -7 -19    5.15    4.97
  13  -7 -19   11.21    5.56
  13   7 -19    4.34    5.39
  15  -7 -21    3.44    5.99
  15   7 -21   -0.07    5.78
  17   7 -23   -8.17    6.10
  24  -8 -18   51.67    7.84
  22   8 -16   12.61    5.47
  22  -8 -16   -4.32    5.95
  22   8 -16   14.15    5.09
  20   8 -14   -0.57    4.93
  20   8 -14    5.04    4.45
  20  -8 -14    3.26    5.77
  18   8 -12   27.68    5.13
  18  -8 -12   26.08    5.70
  18   8 -12   28.10    4.58
  16  -8 -10   24.17    5.29
  16   8 -10   35.17    4.61
  14   8  -8   14.45    3.90
  14  -8  -8    8.95    4.83
  12   8  -6   60.44    5.61
  12  -8  -6   75.93    6.51
  10   8  -4  428.58   10.71
  10  -8  -4  424.60   10.86
   8   8  -2  845.95   17.54
   8  -8  -2  851.21   17.43
  -6   8   0  330.58    7.21
   6   8   0  350.78    8.94
   6  -8   0  334.52   11.34
   6  -8   0  333.46    8.59
   4   8   2   22.81    3.33
   4  -8   2   22.22    3.00
  -4   8  -2   22.69    2.50
   4  -8   2   22.15    4.19
   2  -8   4   47.39    5.14
  -2  -8  -4   51.25    3.92
   2  -8   4   47.21    4.02
  -2   8  -4   46.49    3.29
   0  -8   6  104.81    8.15
   0  -8  -6  114.74    5.38
   0   8  -6  113.72    5.69
   0  -8  -6  105.00    5.76
   0  -8   6  110.95    4.35
  -2  -8   8 1051.06   25.71
   2  -8  -8 1073.61   21.22
   2  -8  -8 1105.36   21.48
   2   8  -8 1092.22   21.98
  -4  -8  10  178.04   10.96
   4  -8 -10  183.44    6.76
   4  -8 -10  173.75    7.39
   4   8 -10  174.31    7.57
   6  -8 -12   13.03    4.56
   6   8 -12    4.94    4.14
   6  -8 -12    8.34    3.78
   8  -8 -14   -2.82    4.05
   8  -8 -14   -5.04    5.03
   8   8 -14    0.66    4.70
  10  -8 -16    3.76    4.32
  10  -8 -16    4.96    5.29
  10   8 -16    5.83    5.19
  12  -8 -18   21.79    5.80
  12  -8 -18    9.88    4.91
  12   8 -18   12.88    5.53
  14  -8 -20    5.11    6.39
  14   8 -20    0.56    5.72
  16   8 -22   40.36    7.17
  18   8 -24    1.35    6.87
  23   9 -17    2.94    5.51
  23  -9 -17    1.99    6.49
  23   9 -17   12.30    5.37
  21  -9 -15   -0.66    5.88
  21   9 -15   -1.81    5.00
  21   9 -15    4.25    4.71
  19  -9 -13   27.15    6.17
  19   9 -13   22.18    4.81
  19   9 -13   29.58    5.31
  17   9 -11   47.73    5.08
  17  -9 -11   47.01    5.91
  15   9  -9   17.63    4.23
  15  -9  -9   20.17    5.42
  13   9  -7    2.85    3.69
  13  -9  -7    1.51    4.81
  11  -9  -5   20.64    4.45
  11   9  -5   14.03    3.72
   9  -9  -3  105.58    6.40
   9   9  -3  104.28    6.15
   7  -9  -1  106.96    5.97
   7   9  -1  124.29    5.99
  -7   9   1  110.00    3.73
   7  -9  -1  115.38    7.59
  -5   9  -1    3.15    2.06
   5  -9   1    0.37    3.94
   5   9   1   -1.65    2.91
   5  -9   1    2.97    3.11
   3  -9   3   11.50    3.00
  -3  -9  -3    8.80    3.47
   3   9   3   12.40    3.39
  -3   9  -3   12.47    2.63
   3  -9   3   16.91    4.91
  -1  -9  -5  488.53   11.46
  -1  -9  -5  479.43   11.15
  -1   9  -5  479.84   11.18
   1  -9   5  462.47   14.41
   1  -9   5  496.88   10.39
  -1  -9   7  133.09    9.12
   1   9  -7  128.89    6.13
   1  -9  -7  116.40    5.74
   1  -9  -7  124.69    6.61
  -3  -9   9    2.58    5.63
   3   9  -9    4.52    3.54
   3  -9  -9    0.40    3.22
   3  -9  -9   -2.87    3.82
   5   9 -11  209.51    8.65
   5  -9 -11  220.02    8.47
   5  -9 -11  215.78    7.87
   7   9 -13   65.25    6.02
   7  -9 -13   71.03    6.09
   7  -9 -13   63.12    6.10
   9   9 -15   22.57    5.63
   9  -9 -15   23.34    5.68
   9  -9 -15   19.41    4.54
  11   9 -17  149.96    9.39
  11  -9 -17  157.30    9.03
  11  -9 -17  144.35    7.83
  13  -9 -19   56.59    7.17
  13   9 -19   51.66    6.96
  15  -9 -21   25.90    7.03
  15   9 -21   19.24    6.73
  17   9 -23   -4.55    6.72
  24  10 -18   27.74    6.27
  22  10 -16   90.68    8.39
  22  10 -16   83.28    7.00
  20  10 -14    8.36    5.09
  20 -10 -14    3.77    6.06
  20  10 -14    5.14    4.77
  18  10 -12   23.47    4.80
  18 -10 -12   20.16    5.90
  16  10 -10   21.35    4.58
  16 -10 -10   21.12    5.54
  14  10  -8  400.38   11.36
  14 -10  -8  447.52   12.61
  12  10  -6  208.98    8.23
  12 -10  -6  218.64    9.12
  10 -10  -4   62.74    5.28
  10  10  -4   57.54    4.65
   8 -10  -2   76.00    6.35
   8  10  -2   79.90    6.09
   8 -10  -2   73.38    6.22
   6 -10   0  145.09    8.78
   6  10   0  144.52    6.55
  -6  10   0  137.05    4.63
   6 -10   0  139.29    6.46
   4  10   2    8.14    3.32
  -4  10  -2    8.55    2.56
   4 -10   2   17.02    4.69
   4 -10   2    6.61    3.32
  -2  10  -4  188.77    6.36
   2 -10   4  187.70    9.47
  -2 -10  -4  189.80    7.30
   2 -10   4  188.68    6.39
   2  10   4  179.75    7.24
   0  10  -6  278.71    8.33
   0 -10  -6  296.22    9.12
   0 -10   6  300.42    7.68
   0 -10  -6  291.84    8.36
   0 -10   6  296.44   11.86
   2  10  -8   13.37    3.88
  -2 -10   8   19.28    5.98
   2 -10  -8   12.12    3.52
   2 -10  -8   20.76    4.33
   4  10 -10   17.38    4.45
   4 -10 -10   17.09    4.78
   4 -10 -10   20.80    3.97
   6 -10 -12    0.33    5.07
   6 -10 -12   -0.44    4.07
   6  10 -12   -1.64    4.57
   8 -10 -14  380.64   11.93
   8 -10 -14  388.55   11.05
   8  10 -14  395.89   12.35
  10  10 -16  166.13    9.63
  10 -10 -16  155.62    7.98
  10 -10 -16  174.89    9.21
  12  10 -18    4.46    5.83
  12 -10 -18   16.19    6.57
  14 -10 -20    0.29    6.82
  14  10 -20   -1.77    5.95
  16 -10 -22    3.40    7.35
  16  10 -22    0.49    6.54
  23 -11 -17   19.63    7.31
  23  11 -17   18.54    6.05
  21 -11 -15    0.58    6.34
  21  11 -15    7.17    5.18
  21  11 -15   -0.03    5.32
  19 -11 -13    0.52    5.79
  19  11 -13   18.04    5.03
  17 -11 -11   27.18    6.01
  17  11 -11   39.40    5.25
  15  11  -9  195.60    8.15
  15 -11  -9  207.56    9.45
  13 -11  -7   93.98    8.00
  13  11  -7   91.02    6.31
  11  11  -5  142.39    7.37
  11 -11  -5  142.39    7.93
   9 -11  -3  149.79    9.43
   9  11  -3  160.01    7.47
   9 -11  -3  145.68    7.84
   7 -11  -1   16.25    5.26
   7  11  -1    8.72    3.78
   7 -11  -1   12.28    4.35
   5  11   1   15.23    3.75
   5 -11   1   15.28    4.77
   5 -11   1   20.17    4.16
  -5  11  -1   19.29    2.69
   3 -11   3  208.15    9.97
   3 -11   3  208.12    7.18
  -3  11  -3  198.04    6.55
   3  11   3  196.97    7.50
  -3 -11  -3  197.21    7.73
  -1 -11  -5   76.86    6.39
  -1  11  -5   75.25    5.45
   1  11   5   74.33    6.29
   1 -11   5   81.35    7.38
   1 -11   5   80.76    5.43
   1 -11  -7   31.75    4.08
  -1 -11   7   24.22    6.14
   1 -11  -7   38.92    4.93
   1  11  -7   32.52    4.27
   3 -11  -9   -2.16    4.67
   3  11  -9    3.35    4.09
  -3 -11   9    2.15    6.55
   3 -11  -9    0.95    3.68
   5  11 -11   77.07    6.19
   5 -11 -11   73.67    6.50
   5 -11 -11   74.16    6.42
   7 -11 -13   71.87    6.69
   7  11 -13   73.36    6.45
   7 -11 -13   66.90    5.41
   9  11 -15   17.14    5.71
   9 -11 -15    9.58    5.75
   9 -11 -15    8.76    4.61
  11  11 -17    9.81    5.85
  11 -11 -17    7.20    6.25
  13 -11 -19    3.04    6.67
  13  11 -19    5.88    6.30
  15  11 -21    3.72    6.63
  15 -11 -21    0.88    7.27
  22 -12 -16   11.02    7.37
  22  12 -16   16.74    5.92
  20 -12 -14    5.12    6.54
  20  12 -14   18.21    5.42
  18  12 -12  123.73    8.01
  18 -12 -12  117.30    9.04
  16  12 -10   35.63    5.19
  16 -12 -10   36.52    6.30
  14  12  -8   41.87    4.95
  14 -12  -8   39.15    6.00
  12 -12  -6   44.96    6.05
  12  12  -6   36.44    4.84
  10  12  -4  500.85   13.31
  10 -12  -4  530.05   16.17
  10 -12  -4  534.42   13.82
   8  12  -2  396.49   10.98
   8 -12  -2  407.18   11.44
   8 -12  -2  381.73   13.61
   6  12   0    1.32    3.76
   6 -12   0    5.45    4.44
   6 -12   0    2.60    5.24
  -4  12  -2  162.92    6.07
   4 -12   2  176.70    7.40
   4 -12   2  168.22   10.17
   4  12   2  165.23    7.39
  -2 -12  -4   20.95    4.73
  -2  12  -4   32.71    3.77
   2 -12   4   23.03    5.79
   2 -12   4   31.34    4.20
   2  12   4   30.37    4.46
   0 -12   6  415.05   10.18
   0 -12   6  417.04   15.27
   0  12  -6  399.04   10.82
   0 -12  -6  408.53   11.44
   0  12   6  414.00   11.31
   2 -12  -8   36.43    5.60
   2  12  -8   43.29    4.91
  -2 -12   8   46.61    7.54
   4 -12 -10   19.91    5.68
   4 -12 -10   22.45    4.49
   4  12 -10   18.36    4.98
   6  12 -12    4.22    4.99
   6 -12 -12    3.82    4.17
   6 -12 -12    3.82    5.70
   8  12 -14   43.78    6.30
   8 -12 -14   48.42    6.48
   8 -12 -14   47.19    5.31
  10 -12 -16   35.86    6.86
  10  12 -16   27.72    6.40
  12 -12 -18   -6.13    6.50
  12  12 -18   11.36    6.32
  14 -12 -20  122.90   10.31
  14  12 -20  130.24   10.28
  16 -12 -22   -1.70    8.06
  21  13 -15   74.60    7.14
  21 -13 -15   65.28    8.31
  19 -13 -13   22.12    6.83
  19  13 -13   29.95    5.75
  17 -13 -11   63.84    7.33
  17  13 -11   65.33    6.21
  15  13  -9    4.54    4.48
  15 -13  -9    0.61    5.68
  13 -13  -7   17.70    6.97
  13  13  -7    6.85    4.35
  13 -13  -7   12.14    5.70
  11  13  -5  796.37   18.40
  11 -13  -5  823.77   19.07
  11 -13  -5  867.82   22.26
   9 -13  -3  244.64   11.54
   9 -13  -3  230.26    9.57
   9  13  -3  232.49    9.13
   7  13  -1  106.86    7.49
   7 -13  -1  121.05    9.58
   7 -13  -1  127.87    7.83
   5 -13   1  138.42   10.28
   5 -13   1  135.22    7.56
   5  13   1  145.30    7.48
  -3  13  -3    2.11    3.33
   3 -13   3    4.97    4.37
   3 -13   3    2.22    5.53
  -3 -13  -3    1.09    4.71
   3  13   3    1.06    4.07
   1 -13   5  404.86   10.48
  -1 -13  -5  405.21   11.77
  -1  13  -5  384.65   10.60
   1  13   5  409.76   11.23
   1 -13   5  412.05   14.80
   1  13  -7  103.28    7.04
   1 -13  -7   99.39    7.82
  -1 -13   7  110.63    9.49
  -1  13   7   95.33    7.57
  -3 -13   9    9.07    8.02
   3  13  -9   14.03    4.82
   3 -13  -9   11.81    5.57
   5  13 -11   84.08    7.59
   5 -13 -11   74.63    6.53
   5 -13 -11   76.20    6.73
   7  13 -13    4.69    5.37
   7 -13 -13    0.09    4.36
   7 -13 -13   -1.76    5.89
   9  13 -15  350.66   12.66
   9 -13 -15  344.14   12.34
  11  13 -17   33.64    6.88
  11 -13 -17   26.96    7.18
  13 -13 -19   64.89    8.34
  13  13 -19   76.12    8.31
  15 -13 -21   64.79    9.03
  15  13 -21   66.14    8.70
  20  14 -14   30.54    6.20
  20 -14 -14   28.32    7.60
  18  14 -12   15.86    5.36
  18 -14 -12    5.70    6.73
  16 -14 -10   41.14    7.06
  16  14 -10   46.56    5.79
  14  14  -8   76.13    6.78
  14 -14  -8   64.42    7.17
  12  14  -6    2.90    4.36
  12 -14  -6    0.26    5.54
  10 -14  -4    5.94    5.56
  10  14  -4   15.82    4.63
  10 -14  -4   10.97    6.31
   8 -14  -2   -6.09    5.19
   8  14  -2   -5.70    4.39
   8 -14  -2   -8.38    5.70
   6  14   0   31.98    5.11
   6 -14   0   42.07    7.10
   6 -14   0   52.26    5.90
   4 -14   2   50.15    7.39
   4 -14   2   51.26    5.63
   4  14   2   50.91    5.31
   2 -14   4   47.10    5.23
  -2 -14  -4   29.97    5.59
   2 -14   4   43.98    7.81
  -2  14  -4   38.07    4.27
   2  14   4   30.16    4.96
   0  14   6    6.01    4.62
   0 -14   6    2.17    7.37
   0  14  -6    5.60    4.19
   0 -14   6    4.30    4.46
   0 -14  -6   -0.37    5.13
  -2 -14   8   20.08    8.75
  -2  14   8   40.94    5.36
   2  14  -8   31.56    5.04
   2 -14  -8   35.08    6.11
   4  14 -10   21.65    5.41
   4 -14 -10   26.61    5.94
   6 -14 -12  130.44    8.62
   6  14 -12  141.95    8.86
   6 -14 -12  116.69    7.21
   8  14 -14   73.02    7.24
   8 -14 -14   69.01    7.61
  10  14 -16    2.17    6.17
  10 -14 -16    8.91    6.75
  12 -14 -18  -11.66    7.03
  12  14 -18    5.68    6.59
  14 -14 -20   31.52    8.61
  14  14 -20   28.39    7.63
  19 -15 -13   17.66    7.63
  19  15 -13   32.49    6.11
  17  15 -11  147.29    8.75
  17 -15 -11  130.16   10.02
  15  15  -9   25.88    5.38
  15 -15  -9   16.50    6.74
  13 -15  -7   -6.09    6.03
  13  15  -7    7.69    4.72
  11  15  -5   28.51    5.29
  11 -15  -5   29.11    6.28
   9 -15  -3    9.00    6.31
   9 -15  -3   12.31    5.71
   9  15  -3   18.05    4.94
   7 -15  -1   19.52    5.60
   7 -15  -1   15.67    6.85
   7  15  -1   13.93    4.86
   5 -15   1  285.91   10.02
   5  15   1  276.58    9.91
   5 -15   1  294.35   13.32
   3 -15   3   29.12    7.57
   3 -15   3   37.62    5.41
   3  15   3   33.15    4.99
  -1  15  -5    3.94    3.91
   1 -15   5   -5.73    6.58
   1 -15   5    4.41    4.66
  -1 -15  -5    1.40    5.26
   1  15   5   -4.97    4.29
   1 -15  -7   74.86    6.62
  -1 -15   7   80.23    9.98
  -1  15   7   76.24    6.95
   1  15  -7   81.79    6.81
  -3  15   9    8.09    4.83
   3 -15  -9    2.36    5.62
   3  15  -9   18.97    4.86
   5 -15 -11   -6.23    5.73
  -5  15  11    6.45    4.96
   5  15 -11    7.72    5.33
   7  15 -13   49.98    6.69
   7 -15 -13   45.57    7.16
   9 -15 -15    2.97    6.81
   9  15 -15    6.50    6.22
  11  15 -17   80.87    8.25
  11 -15 -17   71.03    8.55
  13 -15 -19    4.75    7.88
  13  15 -19   11.19    7.09
  18  16 -12   50.04    6.75
  18 -16 -12   46.83    8.30
  16  16 -10   25.72    5.80
  16 -16 -10   10.79    7.08
  14 -16  -8   -7.76    6.46
  14  16  -8   15.07    5.26
  12  16  -6   91.31    7.42
  12 -16  -6   90.97    7.96
  10 -16  -4   46.47    6.83
  10  16  -4   57.99    5.89
   8  16  -2   26.18    5.19
   8 -16  -2   19.20    5.99
   6 -16   0   -3.15    5.31
   6  16   0   10.39    4.92
   6 -16   0    4.38    6.68
   4 -16   2   24.76    7.61
   4  16   2   27.75    5.15
   4 -16   2   23.78    5.40
   2 -16   4  416.68   16.47
  -2 -16  -4  377.62   12.02
   2 -16   4  393.17   11.14
   2  16   4  385.89   11.27
   0 -16  -6  225.87    9.81
   0  16   6  219.28    8.70
   0  16  -6  227.61    8.65
   0 -16   6  256.01   14.51
  -2 -16   8  112.13   11.25
  -2  16   8  111.83    7.46
   2 -16  -8   98.62    8.08
   2  16  -8  118.37    7.60
  -4  16  10  471.35   13.03
   4  16 -10  495.70   14.08
   4 -16 -10  475.87   14.27
   6 -16 -12  256.51   11.15
   6  16 -12  280.97   11.36
   8  16 -14    2.10    6.01
   8 -16 -14   -1.35    6.70
  10  16 -16   23.04    7.04
  10 -16 -16   17.81    7.47
  12  16 -18   10.47    7.08
  12 -16 -18    2.94    8.03
  17  17 -11   62.43    7.14
  17 -17 -11   43.94    8.39
  15  17  -9   19.60    5.70
  15 -17  -9   14.08    7.25
  13 -17  -7   12.75    6.90
  13  17  -7   19.18    5.33
  11 -17  -5   -5.39    6.41
  11  17  -5   10.61    5.22
   9  17  -3  172.18    8.57
   9 -17  -3  149.21    9.41
   7 -17  -1   35.59    6.43
   7  17  -1   37.60    5.52
   5 -17   1    7.82    5.64
   5 -17   1   -0.87    7.42
   5  17   1   -0.62    4.89
   3 -17   3   14.13    5.59
   3  17   3   20.85    5.09
   3 -17   3    9.48    8.08
   1 -17   5   43.30    8.65
  -1 -17  -5   46.11    6.54
   1  17   5   56.21    5.56
  -1  17   7  139.39    7.60
   1 -17  -7  123.46    8.83
   1  17  -7  148.08    7.87
  -1 -17   7  126.50   12.17
   3 -17  -9   -1.26    6.21
   3  17  -9    3.18    4.88
  -3  17   9    0.03    4.74
   5 -17 -11   12.26    6.63
   5  17 -11   18.77    5.97
   7 -17 -13   -6.01    6.58
   7  17 -13    2.96    5.93
   9  17 -15  197.39   10.88
   9 -17 -15  186.67   11.29
  11 -17 -17   24.80    8.31
  11  17 -17   31.98    7.91
  16 -18 -10   18.40    8.22
  16  18 -10   46.37    6.84
  14  18  -8  433.46   13.34
  14 -18  -8  427.65   14.75
  12  18  -6   19.42    5.48
  12 -18  -6   12.66    7.03
  10  18  -4   22.07    5.54
  10 -18  -4    7.43    6.73
   8 -18  -2   72.61    7.63
   8  18  -2   89.20    7.62
   6  18   0    8.69    5.12
   6 -18   0    4.81    6.14
   4  18   2    4.14    5.12
   4 -18   2    1.07    5.74
   2  18   4  300.96   10.52
   2 -18   4  292.87   15.53
  -2 -18  -4  265.29   11.09
   0  18   6  490.51   13.37
   0 -18  -6  457.78   14.36
   0 -18   6  524.12   19.48
   2 -18  -8   68.55    7.42
   2  18  -8   71.06    6.16
  -2  18   8   67.81    6.12
   4 -18 -10  163.72   10.19
   4  18 -10  187.57    9.66
   6  18 -12  190.67   10.22
   6 -18 -12  148.52   10.20
   8 -18 -14   -0.02    7.23
   8  18 -14    8.66    6.50
  10 -18 -16   75.78    9.41
  10  18 -16   92.67    8.98
  15 -19  -9   -5.10    7.95
  15  19  -9   28.64    6.25
  13  19  -7   87.26    7.93
  13 -19  -7   46.21    8.37
  11  19  -5  121.08    8.14
  11 -19  -5   95.21    8.60
   9 -19  -3   36.90    7.27
   9  19  -3   54.18    6.33
   7 -19  -1   41.11    7.04
   7  19  -1   56.64    6.32
   5  19   1   32.33    5.79
   5 -19   1   24.70    6.55
   3  19   3   35.26    5.80
   1  19   5   27.91    5.63
  -1 -19  -5   36.70    7.00
   1 -19   5   12.35   10.31
  -1  19   7    9.53    5.20
   1 -19  -7    8.61    6.69
   3  19  -9  116.99    8.40
   3 -19  -9  105.34    9.17
   5  19 -11   27.87    6.43
   5 -19 -11   15.51    7.46
   7  19 -13   -1.83    6.25
   7 -19 -13  -10.12    7.33
   9  19 -15   26.06    7.42
  14 -20  -8    2.95    8.07
  12  20  -6   50.24    6.46
  12 -20  -6   33.63    8.36
  10 -20  -4    3.59    7.15
  10  20  -4   19.69    5.71
   8 -20  -2   63.37    7.82
   8  20  -2   86.94    7.77
   6  20   0   17.98    5.76
   6 -20   0   13.92    6.72
   4  20   2   10.38    5.45
   2  20   4   49.77    6.29
   0 -20  -6   53.84    7.58
   2 -20  -8   21.87    7.35
   4  20 -10  126.43    9.20
   4 -20 -10  102.06    9.12
   6  20 -12   61.71    7.40
   6 -20 -12   41.19    8.74
   8  20 -14   33.85    7.49
  11  21  -5   39.95    6.34
  11 -21  -5   22.12    8.30
   9 -21  -3    4.63    7.72
   7 -21  -1   49.12    7.82
   7  21  -1   62.34    6.93
   5  21   1    7.02    5.59
   3  21   3    6.50    5.54
   1 -21  -7   19.45    7.54
   3 -21  -9    5.65    7.77
  10 -22  -4   13.60    8.29
   8 -22  -2    1.27    7.58
   8  22  -2   22.34    6.23
   6  22   0   68.68    7.11
   4  22   2   14.51    6.11
   0 -22  -6   -3.77    7.60
   5  23   1   18.11    6.37
  26   0 -19   -0.67    5.84
  24   0 -17    5.13    5.22
  22   0 -15   -2.11    4.99
  20   0 -13    0.48    4.61
  18   0 -11    5.26    4.54
  16   0  -9    2.54    2.48
  16   0  -9   -1.22    4.07
  14   0  -7    5.88    3.57
  14   0  -7    1.51    2.03
  12   0  -5   -1.10    1.71
  12   0  -5   -2.33    2.95
  10   0  -3    0.82    1.66
  10   0  -3   -0.44    2.75
   8   0  -1   -1.41    2.42
   8   0  -1   -1.03    1.54
  -6   0  -1    2.51    1.61
  -4   0  -3    0.50    1.87
  -2   0  -5   -2.36    2.14
   2   0   5   -0.53    2.75
   0   0   7   13.77    3.16
   0   0  -7   13.88    2.60
   2   0  -9    0.80    1.62
  -2   0   9    0.15    3.53
   2   0  -9    0.65    2.65
   4   0 -11    3.98    3.12
   4   0 -11   -0.79    1.92
   6   0 -13    1.97    3.43
   6   0 -13    2.30    2.35
   8   0 -15    2.30    3.93
   8   0 -15    3.67    3.02
  10   0 -17    4.45    4.48
  12   0 -19   -0.98    4.65
  14   0 -21   -4.40    5.16
  16   0 -23   -7.32    5.43
  18   0 -25   -9.10    6.04
  25  -1 -18   18.51    6.02
  25   1 -18   27.34    6.15
  23   1 -16  139.75    8.80
  23  -1 -16  136.66    8.61
  21   1 -14   45.30    5.68
  21  -1 -14   48.14    5.87
  19  -1 -12   16.13    4.93
  19   1 -12   23.72    5.08
  17  -1 -10   23.89    4.90
  17   1 -10   28.52    3.39
  17   1 -10   26.14    4.89
  15  -1  -8  381.11    8.97
  15  -1  -8  383.05   10.76
  15   1  -8  381.80    9.23
  15   1  -8  383.80   10.69
  13  -1  -6  839.47   17.68
  13  -1  -6  848.96   16.28
  13   1  -6  841.78   16.55
  13   1  -6  854.05   17.62
  11   1  -4  387.94    9.71
  11  -1  -4  405.33    8.32
  11   1  -4  405.22    8.86
  11  -1  -4  402.28    9.92
   9  -1  -2    1.74    1.44
   9  -1  -2    2.32    2.62
   9   1  -2   -0.08    1.77
   7  -1   0  369.51    8.35
   7   1   0  368.86    8.17
  -7   1   0  371.14    7.45
   5  -1   2  361.78    7.86
  -5   1  -2  354.81    7.63
  -5  -1  -2  354.48    7.87
   3  -1   4  112.06    5.80
  -3   1  -4  102.81    4.19
  -3  -1  -4   98.58    4.32
   1   1   6   19.77    2.87
  -1   1  -6   19.78    2.61
   1  -1   6   18.36    3.25
  -1  -1  -6   18.92    2.54
  -1   1   8    2.74    3.09
   1  -1  -8    1.17    1.76
  -1  -1   8    2.33    3.25
   1   1  -8    2.15    2.66
   1  -1  -8    5.98    2.64
   3   1 -10  101.96    3.38
   3  -1 -10  100.70    4.08
   3   1 -10  102.36    5.54
   3  -1 -10  100.38    5.72
   5  -1 -12  403.83   10.78
   5  -1 -12  414.79    9.05
   5   1 -12  408.67    8.54
   5   1 -12  411.59   10.89
   7  -1 -14  307.34    9.74
   7  -1 -14  314.88    8.13
   7   1 -14  313.83    7.60
   7   1 -14  297.45    9.50
   9  -1 -16    8.14    3.54
   9   1 -16    4.37    4.34
   9  -1 -16    4.94    4.32
  11  -1 -18   57.52    5.84
  11   1 -18   51.47    5.83
  13   1 -20  175.51    9.44
  13  -1 -20  174.33    9.30
  15  -1 -22   22.98    6.00
  15   1 -22   22.37    6.00
  17   1 -24   -3.46    5.99
  17  -1 -24   -6.62    5.81
  19   1 -26  -12.17    6.19
  26   2 -19   34.76    6.54
  26  -2 -19   36.34    6.83
  24   2 -17  291.15   11.38
  24  -2 -17  292.03   11.19
  22   2 -15   90.46    7.67
  22  -2 -15   95.34    7.90
  20   2 -13  114.27    7.67
  20  -2 -13  113.26    7.68
  18   2 -11  145.81    7.84
  18  -2 -11  131.80    8.04
  18   2 -11  133.45    6.38
  16   2  -9   59.06    5.13
  16   2  -9   53.17    4.64
  16  -2  -9   50.35    5.12
  14   2  -7  351.87    9.87
  14   2  -7  350.67    8.67
  14  -2  -7  351.89    9.99
  14  -2  -7  354.11    8.04
  12   2  -5   35.71    2.76
  12   2  -5   37.96    3.77
  12  -2  -5   35.34    2.82
  12  -2  -5   40.39    3.94
  10  -2  -3   78.75    5.43
  10   2  -3   71.61    4.19
  10  -2  -3   76.67    2.92
   8  -2  -1  594.06   12.41
   8   2  -1  589.43   11.92
   8  -2  -1  595.84   11.16
   6  -2   1  689.57   13.56
  -6  -2  -1  680.57   13.41
  -6   2  -1  701.96   12.97
   4  -2   3  298.59    9.20
  -4  -2  -3  284.65    6.94
  -4   2  -3  283.91    6.64
   4  -2   3  302.09    6.56
   2  -2   5  110.33    6.85
   2  -2   5  120.55    3.24
  -2  -2  -5  116.78    4.53
  -2   2  -5  117.89    4.86
   2   2   5  115.80    5.20
   0  -2   7  137.11    7.70
   0   2  -7  150.66    5.72
   0   2   7  150.43    6.02
   0  -2  -7  149.54    4.45
   0  -2  -7  156.56    5.68
  -2  -2   9  212.84    9.46
   2  -2  -9  210.78    5.74
   2   2  -9  213.61    7.20
   2  -2  -9  218.29    7.15
   4  -2 -11    6.04    2.49
   4   2 -11    1.97    3.00
   4  -2 -11    3.89    3.08
   6  -2 -13   46.50    3.44
   6   2 -13   50.48    4.54
   6   2 -13   50.04    3.57
   6  -2 -13   51.38    4.41
   8  -2 -15    1.33    3.92
   8  -2 -15    0.06    3.29
   8   2 -15   -1.55    3.91
  10   2 -17   15.66    4.97
  10  -2 -17   27.43    4.36
  10  -2 -17   21.97    5.01
  12  -2 -19    3.36    4.66
  12   2 -19   -2.85    4.56
  14   2 -21   82.27    7.09
  14  -2 -21   73.67    6.86
  16  -2 -23    8.36    5.87
  16   2 -23   28.79    6.32
  18   2 -25  -10.85    6.06
  25  -3 -18    8.39    6.04
  25   3 -18   19.79    6.08
  23   3 -16   81.30    7.81
  23  -3 -16   85.36    7.85
  21   3 -14  101.55    7.64
  21  -3 -14  104.54    7.88
  19   3 -12   10.95    4.70
  19   3 -12   18.15    3.71
  19  -3 -12   18.98    5.04
  17  -3 -10   -0.35    4.55
  17   3 -10   -1.98    4.35
  17   3 -10   -0.51    3.07
  15   3  -8   21.98    3.11
  15   3  -8   23.50    4.33
  15  -3  -8   19.52    4.32
  13   3  -6   22.53    2.77
  13  -3  -6   26.95    3.89
  11  -3  -4   -1.36    2.98
  11  -3  -4    1.70    1.12
  11   3  -4   -1.15    2.12
   9   3  -2  689.20   13.82
   9  -3  -2  688.14   14.35
  -7   3   0  209.73    4.51
   7  -3   0  207.58    6.18
   7   3   0  204.09    6.03
  -5  -3  -2    0.05    1.89
  -5   3  -2    1.37    1.65
   5  -3   2    1.36    2.04
   3  -3   4 1645.02   34.36
  -3   3  -4 1638.36   30.11
   3  -3   4 1669.34   29.36
  -3  -3  -4 1624.33   30.17
  -1  -3  -6  147.31    4.88
   1  -3   6  149.35    7.94
  -1  -3  -6  151.16    5.41
   1   3   6  152.59    5.33
  -1   3  -6  156.69    5.57
   1  -3  -8   37.99    2.74
  -1  -3   8   36.42    4.53
   1  -3  -8   32.75    3.27
   1   3  -8   32.05    3.40
   3  -3 -10    1.12    2.49
   3   3 -10    4.96    3.04
   3  -3 -10    2.26    2.95
  -3  -3  10   -2.95    4.31
   5  -3 -12  857.24   16.81
   5   3 -12  849.50   18.36
   5  -3 -12  840.30   18.06
   7   3 -14  471.23   12.62
   7  -3 -14  475.75   11.11
   7  -3 -14  460.94   12.16
   9   3 -16  284.33   10.30
   9  -3 -16  282.84    8.94
   9  -3 -16  293.17    9.91
  11  -3 -18  124.98    7.84
  11   3 -18  132.90    8.38
  13  -3 -20   -2.32    4.85
  13   3 -20    4.51    5.16
  15   3 -22   74.96    7.33
  15  -3 -22   85.40    7.21
  17   3 -24   12.65    6.38
  19   3 -26    1.54    6.76
  26   4 -19    3.32    6.09
  26  -4 -19   -1.78    6.25
  24  -4 -17   82.99    7.49
  24   4 -17   82.98    7.04
  22  -4 -15   29.84    5.80
  22   4 -15   21.31    5.66
  20   4 -13   -0.68    4.57
  20   4 -13    2.19    3.65
  20  -4 -13    1.45    4.72
  18   4 -11   59.68    5.58
  18  -4 -11   48.94    5.67
  18   4 -11   52.78    4.35
  16   4  -9   49.12    4.11
  16   4  -9   53.39    5.17
  16  -4  -9   52.75    5.38
  14   4  -7   48.40    3.63
  14  -4  -7   50.78    4.73
  12   4  -5    1.41    2.46
  12  -4  -5   -2.81    3.22
  10   4  -3   10.55    2.47
  10  -4  -3    5.72    3.09
   8  -4  -1  447.62   10.15
   8   4  -1  447.76    9.94
   6   4   1   70.72    4.67
   6  -4   1   73.16    4.36
  -6   4  -1   73.78    2.91
  -4   4  -3  117.51    4.36
   4  -4   3  108.67    4.07
   4  -4   3  116.46    6.77
  -4  -4  -3  111.43    4.46
  -2   4  -5 1940.06   35.33
   2  -4   5 1898.41   34.14
   2   4   5 1974.04   38.35
   2  -4   5 1912.23   40.04
  -2  -4  -5 1912.17   35.27
   0   4   7  109.54    4.35
   0   4  -7  114.06    5.41
   0  -4   7  111.29    8.03
   0  -4  -7  118.03    4.79
   0  -4  -7  118.53    5.26
   2   4  -9  113.29    5.94
   2  -4  -9  108.33    5.54
   2  -4  -9  112.54    5.00
  -2  -4   9  115.22    7.96
   4   4 -11   98.04    5.89
   4  -4 -11   92.83    5.20
   4  -4 -11  110.38    6.00
   6  -4 -13  255.11    7.80
   6   4 -13  249.18    8.95
   6  -4 -13  265.03    8.67
   8  -4 -15  503.30   13.15
   8   4 -15  494.80   13.63
   8  -4 -15  517.73   12.30
  10   4 -17  153.11    8.67
  10  -4 -17  152.79    7.80
  10  -4 -17  143.35    8.38
  12  -4 -19   49.39    5.84
  12   4 -19   56.19    6.33
  14   4 -21  141.93    9.40
  14  -4 -21  135.80    9.04
  16   4 -23   -5.70    5.58
  16  -4 -23  -11.00    5.63
  18   4 -25   -1.72    6.56
  25   5 -18   32.11    6.40
  25  -5 -18   28.50    6.85
  23   5 -16    2.44    5.25
  23  -5 -16   -9.07    5.37
  21   5 -14   25.48    4.59
  21  -5 -14   18.32    5.60
  21   5 -14   17.30    5.40
  19   5 -12    1.86    4.45
  19  -5 -12   -2.57    4.65
  19   5 -12    3.97    3.51
  17  -5 -10  108.12    7.51
  17   5 -10  104.60    6.26
  17   5 -10  106.97    7.28
  15   5  -8    1.06    2.98
  15  -5  -8   -1.83    4.12
  13   5  -6   42.85    3.58
  13  -5  -6   39.02    4.42
  11   5  -4   45.15    3.40
  11  -5  -4   42.97    4.05
   9  -5  -2 1301.62   24.97
   9   5  -2 1326.99   24.96
   7   5   0 1210.86   22.83
   7  -5   0 1179.13   22.55
  -5   5  -2  116.36    4.00
   5  -5   2  110.83    4.47
   5  -5   2  113.54    7.16
   3  -5   4  206.66    8.59
  -3  -5  -4  221.98    6.35
   3  -5   4  221.95    5.26
  -3   5  -4  217.74    6.18
   1  -5   6   65.30    6.95
   1  -5   6   59.44    2.66
  -1  -5  -6   69.32    4.38
  -1   5  -6   62.70    4.79
  -1  -5  -6   61.15    4.58
   1   5  -8  148.40    6.27
   1  -5  -8  151.85    5.61
  -1  -5   8  148.58    8.49
   1  -5  -8  156.87    5.93
   3  -5 -10    0.61    2.99
  -3  -5  10   -2.88    4.69
   3  -5 -10    0.71    2.89
   3   5 -10   -3.59    3.12
   5   5 -12   47.98    4.49
   5  -5 -12   49.78    4.30
   5  -5 -12   51.75    4.15
   7  -5 -14   42.67    4.50
   7   5 -14   45.83    5.03
   7  -5 -14   47.18    4.80
   9  -5 -16   76.67    5.99
   9  -5 -16   78.31    7.13
   9   5 -16   71.69    6.13
  11   5 -18   12.41    5.15
  11  -5 -18    7.24    4.69
  11  -5 -18   -3.95    4.47
  13   5 -20   77.68    7.11
  13  -5 -20   74.74    6.58
  15  -5 -22    0.78    5.53
  15   5 -22   23.32    6.35
  17   5 -24   -4.80    6.03
  26   6 -19   61.53    7.21
  24   6 -17  117.92    8.83
  24  -6 -17  109.90    9.26
  22   6 -15  117.41    8.22
  22  -6 -15  109.98    8.59
  22   6 -15  117.59    7.85
  20   6 -13   84.66    6.58
  20   6 -13   76.54    6.32
  20  -6 -13   82.10    7.66
  18  -6 -11    8.44    4.83
  18   6 -11    3.88    4.53
  18   6 -11    4.24    3.60
  16   6  -9   -1.51    3.42
  16  -6  -9   -7.36    4.56
  14  -6  -7   86.73    6.80
  14   6  -7   82.81    5.43
  12  -6  -5   95.17    6.44
  12   6  -5  102.05    5.52
  10  -6  -3   87.73    5.77
  10   6  -3   93.71    5.25
   8   6  -1  289.50    7.90
   8  -6  -1  292.09    7.87
   6   6   1   53.58    3.63
  -6   6  -1   50.25    3.14
   6  -6   1   57.39    5.05
   6  -6   1   50.88    4.36
  -4   6  -3  242.79    6.32
   4  -6   3  237.64    6.17
   4  -6   3  242.07    9.35
  -4  -6  -3  242.91    6.92
   2  -6   5   70.11    7.16
  -2  -6  -5   71.19    4.75
   2  -6   5   71.29    3.57
  -2   6  -5   65.11    4.57
  -2  -6  -5   72.49    4.72
   0   6  -7  396.38    9.88
   0  -6  -7  399.09    9.62
   0  -6  -7  403.09    9.64
   0  -6   7  396.59   12.55
   2  -6  -9  168.97    6.29
   2   6  -9  166.07    6.82
   2  -6  -9  160.94    6.21
  -2  -6   9  152.49    9.09
   4  -6 -11   73.81    5.51
   4  -6 -11   71.62    5.49
   4   6 -11   78.51    5.81
   6  -6 -13  277.58    8.97
   6   6 -13  274.47    9.63
   6  -6 -13  270.87    8.71
   8  -6 -15    1.44    4.34
   8   6 -15    0.21    4.48
   8  -6 -15   -0.34    4.40
  10   6 -17    2.20    4.82
  10  -6 -17   -1.68    4.50
  10  -6 -17   -0.41    4.71
  12   6 -19  167.17    9.52
  12  -6 -19  175.82    9.05
  12  -6 -19  192.95    9.20
  14   6 -21    1.67    5.84
  14  -6 -21    1.72    5.14
  16   6 -23    9.07    6.39
  18   6 -25   20.52    7.41
  25  -7 -18   27.21    7.48
  25   7 -18   25.71    6.61
  23   7 -16  274.10   10.89
  23   7 -16  281.34   10.80
  23  -7 -16  270.71   11.49
  21  -7 -14   -0.49    5.56
  21   7 -14    1.21    4.93
  21   7 -14   11.48    4.53
  19   7 -12    7.38    3.90
  19  -7 -12    1.48    5.11
  19   7 -12    0.05    4.63
  17   7 -10   62.02    4.96
  17  -7 -10   54.79    5.78
  15   7  -8  622.56   14.60
  15  -7  -8  662.43   15.67
  13   7  -6  330.87    9.44
  13  -7  -6  353.62   10.29
  11   7  -4   95.26    5.60
  11  -7  -4   93.57    6.10
   9   7  -2   17.36    3.17
   9  -7  -2   14.83    3.40
   7  -7   0  145.71    5.87
   7   7   0  138.44    5.86
   7  -7   0  136.98    8.69
   5  -7   2  293.97   10.33
   5   7   2  294.20    8.35
  -5   7  -2  294.84    6.88
   5  -7   2  288.00    7.34
   3  -7   4   81.64    7.24
  -3   7  -4   81.46    4.62
   3  -7   4   76.64    4.22
  -3  -7  -4   77.99    4.96
  -1  -7  -6 1212.63   23.14
   1  -7   6 1229.05   21.98
  -1  -7  -6 1192.22   23.22
   1  -7   6 1196.14   27.50
  -1   7  -6 1204.01   23.43
   1   7  -8   -1.29    3.15
  -1  -7   8    2.76    4.76
   1  -7  -8    0.49    2.88
   1  -7  -8   -2.68    3.14
  -3  -7  10  473.23   15.25
   3  -7 -10  478.62   11.37
   3  -7 -10  464.34   11.40
   3   7 -10  479.89   12.14
   5  -7 -12  162.32    7.29
   5   7 -12  169.90    8.11
   5  -7 -12  155.79    7.00
   7   7 -14  670.61   16.66
   7  -7 -14  694.06   15.86
   7  -7 -14  700.90   15.86
   9  -7 -16  274.91    9.60
   9  -7 -16  285.30    9.96
   9   7 -16  277.07   10.70
  11  -7 -18    2.18    5.20
  11   7 -18    8.55    5.31
  11  -7 -18   -6.76    4.54
  13  -7 -20   62.77    6.86
  13   7 -20   60.93    7.14
  13  -7 -20   53.63    6.19
  15   7 -22    1.96    6.22
  17   7 -24  119.74   10.47
  24  -8 -17   14.28    6.91
  24   8 -17   18.43    6.23
  22   8 -15   51.45    6.24
  22   8 -15   47.58    5.81
  22  -8 -15   53.13    7.20
  20  -8 -13  107.17    8.60
  20   8 -13  105.41    7.07
  20   8 -13   97.38    7.67
  18  -8 -11   69.88    6.33
  18   8 -11   71.21    6.31
  16  -8  -9   99.86    7.86
  16   8  -9   98.42    6.57
  14   8  -7  267.85    8.75
  14  -8  -7  290.14    9.93
  12   8  -5  183.82    7.27
  12  -8  -5  187.53    8.12
  10   8  -3  190.04    7.17
  10  -8  -3  205.31    7.37
   8  -8  -1   71.07    5.35
   8   8  -1   65.36    5.19
  -6   8  -1  359.56    7.97
   6  -8   1  355.96   11.69
   6   8   1  380.32    9.52
   6  -8   1  368.76    9.03
   4   8   3  133.37    6.44
   4  -8   3  126.36    7.98
  -4   8  -3  127.29    5.01
   4  -8   3  126.25    5.11
  -2  -8  -5   -0.02    3.25
   2  -8   5    2.92    4.34
  -2   8  -5    0.20    2.63
   2  -8   5    3.17    2.38
  -2  -8  -5    1.56    2.85
   0  -8  -7 1013.26   20.27
   0   8  -7 1016.53   20.60
   0  -8  -7 1053.85   20.51
   0  -8   7 1012.31   24.65
  -2  -8   9  171.39    9.93
   2  -8  -9  172.58    7.07
   2   8  -9  162.20    7.14
   2  -8  -9  174.65    6.63
   4  -8 -11  162.63    7.45
  -4  -8  11  176.40   11.37
   4   8 -11  165.40    7.81
   4  -8 -11  165.11    7.06
   6  -8 -13  863.99   18.73
   6  -8 -13  857.35   18.60
   6   8 -13  868.19   19.82
   8  -8 -15  304.92   10.53
   8  -8 -15  317.41   10.19
   8   8 -15  322.40   11.50
  10   8 -17  285.21   11.13
  10  -8 -17  280.12    9.94
  10  -8 -17  288.92   10.47
  12   8 -19  127.55    9.30
  12  -8 -19  143.37    8.35
  12  -8 -19  147.28    8.98
  14   8 -21   13.21    6.28
  14  -8 -21    6.44    6.38
  16   8 -23   -0.64    6.70
  23   9 -16   56.16    6.70
  23  -9 -16   60.60    7.72
  23   9 -16   59.77    6.46
  21  -9 -14   22.31    6.27
  21   9 -14   21.86    5.15
  21   9 -14   13.19    5.42
  19  -9 -12   95.93    8.19
  19   9 -12  104.71    7.09
  17  -9 -10  251.13    9.89
  17   9 -10  247.70    8.97
  15   9  -8    3.96    3.85
  15  -9  -8    9.72    5.03
  13  -9  -6  240.08    9.25
  13   9  -6  252.40    8.39
  11   9  -4    1.24    3.46
  11  -9  -4    5.95    4.20
   9   9  -2  318.56    9.18
   9  -9  -2  314.64    9.24
   7   9   0   32.95    3.61
   7  -9   0   26.04    4.84
   7  -9   0   33.12    3.76
   5  -9   2  539.90   15.16
   5   9   2  539.96   12.54
  -5   9  -2  526.50   11.23
   5  -9   2  543.75   11.80
   3  -9   4    5.84    2.82
   3  -9   4    2.64    4.62
  -3  -9  -4    6.73    3.64
   3   9   4    5.45    3.59
  -3   9  -4    7.61    2.79
   1  -9   6  344.85    7.92
  -1  -9  -6  334.93    8.97
  -1  -9  -6  331.27    9.29
   1  -9   6  323.94   12.17
  -1   9  -6  331.52    9.05
   1  -9  -8  592.86   13.35
   1   9  -8  592.27   13.83
  -1  -9   8  601.68   17.43
   1  -9  -8  610.77   13.82
   3   9 -10   38.74    4.61
  -3  -9  10   46.25    7.53
   3  -9 -10   38.48    4.72
   3  -9 -10   37.16    4.17
   5  -9 -12  293.87    9.87
   5   9 -12  293.30   10.25
   5  -9 -12  295.31    9.16
   7   9 -14   87.34    8.16
   7  -9 -14   93.82    7.59
   7  -9 -14   91.21    6.76
   9  -9 -16  400.93   12.20
   9   9 -16  407.23   13.20
   9  -9 -16  395.95   11.60
  11   9 -18  181.94    9.86
  11  -9 -18  185.08    8.81
  11  -9 -18  178.68    9.49
  13   9 -20  105.15    9.20
  13  -9 -20  106.16    9.17
  15   9 -22   13.57    6.85
  24  10 -17   53.66    6.55
  22  10 -15   52.07    6.51
  22  10 -15   57.03    6.34
  22 -10 -15   60.24    7.61
  20 -10 -13   13.07    6.05
  20  10 -13    7.50    5.23
  20  10 -13   12.66    4.70
  18 -10 -11  186.02    9.57
  18  10 -11  197.96    8.56
  16 -10  -9  141.24    8.33
  16  10  -9  128.43    7.07
  14 -10  -7   64.40    6.15
  14  10  -7   70.55    6.28
  12  10  -5  596.28   14.53
  12 -10  -5  630.35   15.13
  10 -10  -3  916.18   19.29
  10  10  -3  893.74   19.23
   8 -10  -1   11.51    3.96
   8 -10  -1   16.36    5.23
   8  10  -1   14.65    3.66
   6 -10   1  279.48    8.38
   6  10   1  284.90    8.68
  -6  10  -1  277.07    6.94
   6 -10   1  285.90   10.92
   4 -10   3  499.22   15.06
   4  10   3  497.80   12.15
  -4  10  -3  486.39   10.96
   4 -10   3  517.45   11.37
  -2 -10  -5  295.36    8.98
   2 -10   5  303.75    7.83
   2  10   5  292.98    9.41
  -2  10  -5  286.64    8.37
   2 -10   5  294.14   11.69
   0 -10   7   38.41    6.18
   0 -10  -7   51.51    4.79
   0 -10  -7   48.70    4.28
   0  10  -7   51.31    4.43
   0 -10   7   51.93    4.50
   2  10  -9  366.99   10.54
   2 -10  -9  369.14   10.07
   2 -10  -9  360.02   10.53
  -2 -10   9  364.67   14.17
   4  10 -11  139.40    7.88
   4 -10 -11  141.37    7.91
   4 -10 -11  143.31    7.28
   6 -10 -13  361.78   10.68
   6  10 -13  344.79   11.74
   6 -10 -13  354.64   11.25
   8 -10 -15  456.59   12.33
   8  10 -15  453.26   13.85
   8 -10 -15  444.61   13.01
  10  10 -17  136.43    9.39
  10 -10 -17  150.20    8.92
  10 -10 -17  127.85    7.96
  12 -10 -19   55.19    7.30
  12  10 -19   68.06    7.25
  14  10 -21  122.80   10.03
  14 -10 -21  149.15   10.13
  16  10 -23    3.18    6.99
  23 -11 -16   -3.68    6.92
  23  11 -16    4.19    5.72
  23  11 -16   14.37    5.78
  21  11 -14   16.36    5.73
  21  11 -14   28.03    5.45
  21 -11 -14   16.16    6.52
  19  11 -12   14.68    4.87
  19 -11 -12    2.13    5.94
  17  11 -10   20.91    4.75
  17 -11 -10   16.87    5.79
  15  11  -8    9.18    4.11
  15 -11  -8   -0.25    5.17
  13 -11  -6   17.60    5.42
  13  11  -6   11.03    4.37
  11 -11  -4   53.59    5.77
  11  11  -4   48.89    4.87
   9 -11  -2   39.66    5.07
   9  11  -2   38.91    4.60
   9 -11  -2   38.98    5.77
   7  11   0   40.92    4.48
   7 -11   0   40.41    6.01
   7 -11   0   36.37    4.64
  -5  11  -2   50.40    4.43
   5  11   2   50.53    4.55
   5 -11   2   52.36    6.33
   5 -11   2   56.39    4.67
   3 -11   4   56.60    5.38
   3  11   4   54.28    4.88
  -3  11  -4   52.74    5.02
  -3 -11  -4   56.55    5.05
   3 -11   4   62.91    6.85
   1 -11   6    7.43    5.62
   1  11   6    1.77    4.31
  -1  11  -6   -0.27    3.40
   1 -11   6   -0.32    3.28
  -1 -11  -6    5.96    4.40
   1 -11  -8  299.27    9.77
   1  11  -8  286.89    9.24
   1 -11  -8  292.16    9.09
  -1 -11   8  283.45   12.74
   3 -11 -10  233.55    8.26
   3 -11 -10  229.52    9.14
  -3 -11  10  244.01   14.14
   3  11 -10  221.14    9.02
   5 -11 -12   63.13    5.44
   5 -11 -12   51.78    6.14
   5  11 -12   50.46    5.90
   7  11 -14   48.27    6.20
   7 -11 -14   43.52    5.26
   7 -11 -14   49.65    6.22
   9 -11 -16    7.71    4.87
   9  11 -16   16.78    5.96
   9 -11 -16   12.41    6.08
  11  11 -18    1.62    6.06
  11 -11 -18  -10.21    6.00
  13 -11 -20    1.40    6.91
  13  11 -20   -1.79    6.23
  15 -11 -22   57.71    8.55
  15  11 -22   49.62    7.98
  22  12 -15   14.54    5.66
  22  12 -15    4.89    5.78
  22 -12 -15    7.34    7.09
  20  12 -13   10.61    4.92
  20 -12 -13   -0.61    6.16
  18 -12 -11   40.47    6.86
  18  12 -11   46.61    5.76
  16  12  -9   36.23    5.15
  16 -12  -9   32.06    6.20
  14  12  -7  208.62    8.43
  14 -12  -7  222.23    9.62
  12 -12  -5    0.35    5.82
  12 -12  -5   -5.55    5.10
  12  12  -5    2.52    4.25
  10  12  -3   62.48    5.41
  10 -12  -3   70.43    7.28
  10 -12  -3   63.28    6.11
   8 -12  -1   44.77    6.62
   8  12  -1   45.89    4.98
   8 -12  -1   45.62    5.50
   6 -12   1  754.18   20.37
   6 -12   1  794.81   16.89
   6  12   1  766.57   17.15
   4  12   3  636.85   14.87
   4 -12   3  638.73   14.24
   4 -12   3  640.05   18.56
   2  12   5  153.92    7.75
   2 -12   5  165.82   11.03
   2 -12   5  162.36    6.76
  -2  12  -5  150.92    6.61
  -2 -12  -5  151.21    8.04
   0 -12   7  472.76   16.14
   0  12  -7  469.09   12.16
   0 -12  -7  474.07   12.59
   0  12   7  462.10   12.85
   2 -12  -9  118.79    6.92
  -2 -12   9  113.55   11.11
   2  12  -9  121.80    7.44
   2 -12  -9  114.15    8.06
   4 -12 -11  233.20    8.56
   4 -12 -11  246.92    9.97
   4  12 -11  236.93    9.68
   6 -12 -13   33.84    4.99
   6  12 -13   37.49    6.03
   6 -12 -13   44.53    6.22
   8 -12 -15    0.04    5.91
   8 -12 -15   -7.21    4.55
   8  12 -15    7.24    5.63
  10 -12 -17  143.08    9.53
  10  12 -17  143.99    9.79
  12 -12 -19  100.63    9.47
  12  12 -19   96.16    8.58
  14  12 -21   23.04    7.28
  14 -12 -21   32.82    8.06
  21  13 -14  242.27   10.44
  19 -13 -12   20.89    6.74
  19  13 -12   37.21    5.68
  17  13 -10   53.91    5.81
  17 -13 -10   41.94    6.75
  15  13  -8   63.20    5.64
  15 -13  -8   61.33    6.74
  13  13  -6  231.45    9.06
  13 -13  -6  248.11    9.98
  13 -13  -6  251.00   12.69
  11 -13  -4  138.17   10.37
  11 -13  -4  132.66    8.47
  11  13  -4  131.26    7.30
   9  13  -2    8.20    4.64
   9 -13  -2   13.64    6.25
   9 -13  -2   16.10    5.54
   7  13   0   -4.16    4.25
   7 -13   0   -0.89    5.37
   7 -13   0    4.10    4.99
   5 -13   2    3.99    4.68
   5  13   2    2.00    4.31
   5 -13   2    1.25    5.64
   3 -13   4   13.62    6.18
  -3  13  -4    6.83    3.58
   3  13   4    8.31    4.44
  -3 -13  -4    3.03    5.03
   3 -13   4    5.68    4.44
  -1  13  -6   44.89    4.70
  -1 -13  -6   47.49    5.82
   1 -13   6   55.08    8.17
   1  13   6   48.01    5.65
   1  13  -8  372.29   11.07
   1 -13  -8  396.13   11.84
  -1  13   8  365.41   11.68
  -1 -13   8  381.06   15.32
   3  13 -10   49.07    5.59
   3 -13 -10   51.80    6.31
   3 -13 -10   34.39    4.75
  -3 -13  10   45.86    9.94
   5  13 -12   10.65    5.26
   5 -13 -12   -1.54    5.57
   5 -13 -12    0.63    4.27
   7 -13 -14    0.52    4.66
   7 -13 -14    1.65    5.88
   7  13 -14    6.57    5.66
   9  13 -16   11.93    6.15
   9 -13 -16   13.80    6.64
  11 -13 -18   20.79    7.17
  11  13 -18   26.26    7.03
  13  13 -20    0.83    6.65
  13 -13 -20   10.58    7.69
  15 -13 -22   -1.00    8.18
  20 -14 -13   20.36    7.33
  20  14 -13   35.49    6.05
  18 -14 -11    6.56    6.61
  18  14 -11   20.07    5.50
  16  14  -9   30.56    5.36
  16 -14  -9   19.48    6.62
  14 -14  -7   23.62    6.28
  14  14  -7   28.44    5.05
  12  14  -5   50.40    5.44
  12 -14  -5   42.72    7.29
  12 -14  -5   41.32    6.35
  10 -14  -3   84.86    8.06
  10  14  -3   71.67    6.91
  10 -14  -3   82.54    6.86
   8 -14  -1    8.87    5.42
   8 -14  -1    2.76    6.20
   8  14  -1   -1.25    4.45
   6 -14   1    4.99    6.02
   6 -14   1    7.68    5.25
   6  14   1    8.49    4.65
   4  14   3   92.85    7.19
   4 -14   3   89.37    8.18
   4 -14   3   96.10    7.18
   2  14   5   98.68    7.23
  -2 -14  -5   93.71    7.90
   2 -14   5  101.43    6.80
  -2  14  -5  110.41    6.55
   2 -14   5  100.01    8.82
   0  14  -7   64.99    5.43
   0 -14  -7   51.12    6.24
   0  14   7   67.69    5.90
   0 -14   7   54.14    8.83
   2 -14  -9   10.30    5.73
  -2  14   9   16.51    5.05
   2  14  -9   14.32    4.91
  -2 -14   9   14.05    8.23
   4 -14 -11   69.19    5.59
   4  14 -11   79.98    7.53
   4 -14 -11   59.76    6.63
   6  14 -13   28.21    6.10
   6 -14 -13   17.47    4.84
   6 -14 -13   26.37    6.50
   8 -14 -15  176.99    9.99
   8  14 -15  194.73   10.42
  10 -14 -17   46.35    7.77
  10  14 -17   47.83    7.33
  12 -14 -19    5.16    7.50
  12  14 -19   -1.76    6.77
  14 -14 -21    9.57    8.29
  19 -15 -12   -4.62    7.13
  17 -15 -10   32.78    7.21
  17  15 -10   47.66    6.06
  15  15  -8   40.61    5.58
  15 -15  -8   29.85    6.95
  13  15  -6    9.96    4.83
  13 -15  -6   -0.64    6.04
  11  15  -4  757.46   18.25
  11 -15  -4  774.27   18.54
  11 -15  -4  817.25   22.30
   9  15  -2  145.08    7.93
   9 -15  -2  147.18    8.57
   9 -15  -2  153.59   11.08
   7 -15   0  315.71   13.91
   7 -15   0  307.35   10.59
   7  15   0  294.02   10.31
   5 -15   2 1019.08   21.56
   5 -15   2 1043.11   26.53
   5  15   2 1016.87   21.94
   3 -15   4  212.06    8.51
   3  15   4  221.65    8.81
   3 -15   4  222.98   12.51
  -1 -15  -6   21.79    5.65
   1 -15   6   15.54    7.52
  -1  15  -6   26.37    4.52
   1  15   6   16.70    5.00
  -1  15   8  177.72    8.38
   1  15  -8  185.83    8.56
   1 -15  -8  183.34    9.14
  -1 -15   8  193.48   13.00
   3 -15 -10  123.21    8.78
   3  15 -10  146.65    8.23
  -3  15  10  128.89    7.84
   5  15 -12   11.78    5.91
   5 -15 -12   12.35    6.35
   7 -15 -14  204.00   10.63
   7  15 -14  214.18   10.53
   9  15 -16   21.16    6.69
   9 -15 -16   11.07    7.10
  11 -15 -18   60.62    8.46
  11  15 -18   63.98    8.37
  13 -15 -20   -1.70    8.33
  18  16 -11   15.65    5.92
  18 -16 -11  -12.24    7.22
  16  16  -9   23.89    5.53
  16 -16  -9    0.16    6.88
  14 -16  -7   48.84    7.46
  14  16  -7   57.46    6.04
  12  16  -5   10.27    5.26
  12 -16  -5   -0.55    6.33
  10 -16  -3    0.67    5.90
  10  16  -3    4.99    4.98
   8  16  -1  200.23    9.08
   8 -16  -1  222.99   12.70
   8 -16  -1  182.77    9.30
   6 -16   1   42.39    8.06
   6 -16   1   39.31    5.93
   6  16   1   38.66    5.45
   4  16   3   10.16    4.72
   4 -16   3    4.41    6.99
   4 -16   3   11.28    5.22
  -2 -16  -5   23.69    5.84
   2  16   5   20.93    5.11
   2 -16   5   14.96    8.34
   0 -16  -7   63.00    6.74
   0  16  -7   73.51    6.71
   0 -16   7   56.72    9.27
   0  16   7   66.95    6.00
   2 -16  -9    5.93    5.99
  -2 -16   9   -4.65   10.24
   2  16  -9   10.85    5.09
  -2  16   9    3.77    5.10
  -4  16  11    1.27    5.06
   4 -16 -11   -1.28    6.21
   4  16 -11    3.15    5.56
   6 -16 -13   -0.46    6.47
   6  16 -13   -0.93    5.85
   8  16 -15  105.36    9.32
   8 -16 -15   96.31    8.63
  10  16 -17   22.03    7.18
  10 -16 -17   12.18    7.45
  12  16 -19   13.30    7.36
  12 -16 -19    4.70    8.09
  17 -17 -10   81.98    9.23
  17  17 -10  122.03    8.70
  15  17  -8  168.21    8.90
  15 -17  -8  149.73   10.57
  13 -17  -6  192.96   10.74
  13  17  -6  207.37    9.21
  11  17  -4  217.74    9.52
  11 -17  -4  200.55   10.49
   9 -17  -2   26.09    6.43
   9  17  -2   33.18    5.67
   7 -17   0    4.24    5.77
   7 -17   0   -2.43    7.84
   7  17   0    5.64    5.14
   5 -17   2   67.88    9.21
   5  17   2   49.88    5.92
   5 -17   2   60.44    6.37
   3 -17   4   10.94    8.48
   3  17   4    7.57    5.03
   1 -17   6   50.87    9.98
  -1 -17  -6   66.28    6.79
   1  17   6   58.82    5.88
  -1 -17   8  235.85   16.26
   1 -17  -8  204.48   10.13
  -1  17   8  232.05    9.31
   1  17  -8  223.98    9.38
  -3  17  10   39.94    5.83
   3  17 -10   44.30    6.01
   3 -17 -10   46.44    7.08
   5  17 -12   16.24    6.11
   5 -17 -12    4.75    6.61
   7 -17 -14   17.04    7.27
   7  17 -14    0.68    6.21
   9  17 -16   27.44    7.35
   9 -17 -16   10.56    7.62
  11 -17 -18   -2.43    8.06
  11  17 -18    3.42    7.17
  16 -18  -9   13.84    7.94
  14 -18  -7    6.86    7.33
  14  18  -7   29.35    5.80
  12 -18  -5   -6.64    6.77
  12  18  -5   12.62    5.39
  10  18  -3   43.43    6.04
  10 -18  -3   30.37    7.00
   8 -18  -1   35.57    6.84
   8  18  -1   37.53    5.97
   6 -18   1   12.45    6.06
   6  18   1   13.36    5.44
   4  18   3   14.29    5.53
   4 -18   3    8.12    8.53
   2 -18   5    7.31    9.12
   2  18   5   10.82    5.30
   0  18   7   -6.10    4.89
   0 -18   7    1.58   10.27
   0 -18  -7    2.68    6.28
   2 -18  -9    9.37    6.51
  -2  18   9    7.63    5.18
   2  18  -9   21.69    5.53
   4 -18 -11   -1.32    6.66
   4  18 -11   11.55    5.84
   6  18 -13   34.21    6.94
   6 -18 -13   18.86    7.47
   8  18 -15   31.33    7.53
   8 -18 -15   19.60    8.05
  10  18 -17   13.26    7.32
  15  19  -8   33.06    6.24
  15 -19  -8    4.78    8.12
  13  19  -6   98.06    8.11
  13 -19  -6   75.45    8.83
  11 -19  -4  129.24    9.89
  11  19  -4  153.36    8.68
   9  19  -2   16.28    5.69
   9 -19  -2    5.76    6.64
   7 -19   0   42.24    7.20
   7  19   0   62.26    6.46
   5  19   2   11.55    5.59
   3  19   4   27.51    5.94
   3 -19   4   27.80    9.89
   1  19   6   19.88    5.55
   1 -19   6   -9.48   10.11
  -1 -19  -6   10.43    6.52
  -1  19   8   56.02    6.24
   1 -19  -8   57.14    7.60
   3 -19 -10   -1.82    6.74
   3  19 -10    7.88    5.70
   5  19 -12    9.03    6.34
   5 -19 -12   -2.88    7.18
   7 -19 -14   27.29    8.29
   7  19 -14   33.48    7.18
  14 -20  -7   32.60    8.69
  12  20  -5   44.44    6.54
  12 -20  -5   29.90    8.33
  10 -20  -3   27.26    7.45
  10  20  -3   34.00    6.39
   8 -20  -1   13.62    6.99
   8  20  -1   17.25    5.90
   6  20   1   45.68    6.27
   4  20   3   93.98    8.36
   2  20   5  263.89   10.50
   0 -20   7   83.80   13.09
   0 -20  -7  102.16    9.19
   0  20   7  104.67    7.99
   2 -20  -9   21.89    7.57
   4 -20 -11   -4.03    7.24
   6  20 -13   43.09    7.33
  11  21  -4   88.70    8.47
   9  21  -2   56.92    6.96
   9 -21  -2   36.79    8.01
   7  21   0   23.16    6.25
   5  21   2   33.15    6.26
   3  21   4   12.98    5.92
   1 -21  -8   15.53    7.48
   3 -21 -10    3.49    7.63
  10 -22  -3    8.39    8.17
   8  22  -1   26.82    6.65
   6  22   1   59.86    7.10
   4  22   3    0.38    5.93
  26   0 -18  136.31    9.67
  24   0 -16   17.54    5.76
  22   0 -14   22.26    5.55
  20   0 -12   22.46    4.98
  18   0 -10   12.38    4.85
  16   0  -8  164.76    7.95
  16   0  -8  165.10    5.80
  14   0  -6  843.13   16.49
  14   0  -6  844.29   17.86
  12   0  -4 1196.24   21.97
  12   0  -4 1154.37   22.92
  10   0  -2  450.92   10.58
  10   0  -2  462.59    9.46
   8   0   0  183.68    5.28
  -6   0  -2  792.16   15.13
  -4   0  -4  111.43    4.41
  -2   0  -6  265.62    7.19
   2   0   6  267.50    8.46
   0   0  -8  987.16   19.53
   0   0   8  973.75   21.76
   2   0 -10 1282.22   23.04
   2   0 -10 1282.04   25.09
  -2   0  10 1268.20   27.86
   4   0 -12  548.74   10.88
   4   0 -12  545.73   13.03
   6   0 -14  463.87   12.34
   8   0 -16  104.83    7.48
  10   0 -18   62.32    6.15
  12   0 -20   40.42    5.94
  14   0 -22   34.84    6.31
  16   0 -24   33.74    6.81
  18   0 -26   38.35    7.69
  27  -1 -19   48.29    7.13
  27   1 -19   48.13    7.26
  25   1 -17   86.83    7.41
  25  -1 -17   80.62    7.41
  23   1 -15   25.44    5.60
  23  -1 -15   27.49    5.81
  21  -1 -13   77.37    7.31
  21   1 -13   84.47    6.59
  19  -1 -11   34.14    5.22
  19   1 -11   47.76    5.47
  17   1  -9   22.73    4.82
  17   1  -9   19.60    3.13
  17  -1  -9   25.98    4.89
  15   1  -7   85.52    4.74
  15  -1  -7   83.34    6.64
  15   1  -7   78.94    6.42
  15  -1  -7   90.50    4.28
  13   1  -5  128.33    4.80
  13  -1  -5  129.40    4.34
  13   1  -5  128.67    6.28
  13  -1  -5  132.21    6.37
  11   1  -3  346.94    8.97
  11  -1  -3  362.92    7.55
  11   1  -3  341.14    7.97
  11  -1  -3  336.73    9.04
   9  -1  -1  228.97    5.40
   9  -1  -1  223.51    6.81
   9   1  -1  218.22    5.88
   7  -1   1  128.81    4.85
  -7   1  -1  132.22    4.00
  -7  -1  -1  125.67    4.39
  -5  -1  -3  161.86    5.09
  -5   1  -3  159.23    4.82
   3  -1   5 1601.05   33.40
   3   1   5 1638.45   32.95
  -3   1  -5 1579.79   29.65
  -3  -1  -5 1619.72   29.72
  -1   1  -7  909.88   18.09
   1  -1   7  908.72   20.54
  -1  -1  -7  904.36   17.99
   1   1   7  916.46   19.92
  -1   1   9    1.50    3.35
  -1  -1   9    3.63    3.84
   1  -1  -9    4.02    1.96
   1  -1  -9    2.47    2.85
   1   1  -9    3.77    2.95
   3  -1 -11  323.00    8.99
   3   1 -11  304.41    8.88
   3  -1 -11  302.53    7.09
   5  -1 -13  184.82    7.35
   5   1 -13  190.72    5.20
   5   1 -13  188.95    7.45
   5  -1 -13  179.72    5.72
   7   1 -15  636.30   15.60
   7  -1 -15  665.15   15.73
   9   1 -17  110.45    7.94
   9  -1 -17  111.17    7.85
  11  -1 -19    3.71    4.79
  11   1 -19   -0.74    4.73
  13  -1 -21  471.84   14.33
  13   1 -21  453.24   14.33
  15  -1 -23   15.46    6.13
  15   1 -23   11.80    6.13
  17  -1 -25   -7.14    6.13
  17   1 -25   -9.56    6.17
  26  -2 -18   30.32    6.68
  26   2 -18   30.46    6.57
  24   2 -16   48.70    6.30
  24  -2 -16   42.56    6.35
  22   2 -14  185.70    9.06
  22  -2 -14  184.71    9.13
  20  -2 -12  133.35    8.11
  20   2 -12  133.38    7.95
  18  -2 -10  100.18    7.56
  18   2 -10   86.87    7.20
  18   2 -10   94.60    5.73
  16  -2  -8  148.68    7.82
  16   2  -8  155.30    7.61
  16   2  -8  141.65    5.83
  14  -2  -6   77.73    6.07
  14   2  -6   62.22    5.74
  14   2  -6   67.02    4.36
  12  -2  -4  842.93   17.59
  12   2  -4  852.35   16.75
  12  -2  -4  853.10   15.88
  10  -2  -2  363.49    7.27
  10   2  -2  351.41    8.16
  10  -2  -2  343.04    9.08
   8   2   0  728.36   14.51
   8  -2   0  727.11   14.68
  -8   2   0  732.30   13.59
  -6   2  -2  814.31   15.10
  -6  -2  -2  792.95   15.47
   6  -2   2  791.06   15.35
  -4   2  -4 1789.36   32.97
  -4  -2  -4 1800.23   33.10
   4  -2   4 1795.39   37.46
   4  -2   4 1862.14   32.38
  -2   2  -6  488.26   10.82
  -2  -2  -6  481.57   10.72
   2   2   6  490.42   11.71
   2  -2   6  476.55   13.01
   2  -2   6  490.56    9.21
   0  -2  -8 1559.49   29.67
   0   2   8 1578.66   32.44
   0  -2  -8 1600.85   28.49
   0  -2   8 1561.84   33.49
   0   2  -8 1582.31   29.89
  -2  -2  10   11.49    4.31
   2   2 -10   16.60    3.33
   2  -2 -10   13.67    3.26
   2  -2 -10   13.31    2.45
   4  -2 -12  333.45    7.91
   4  -2 -12  328.91    9.56
   4   2 -12  324.83    9.48
   6   2 -14    5.41    3.79
   6  -2 -14    6.11    3.03
   6  -2 -14    4.38    3.78
   8  -2 -16   74.90    5.77
   8   2 -16   67.45    5.83
   8  -2 -16   62.50    5.56
  10  -2 -18  582.47   15.37
  10   2 -18  598.33   15.72
  12  -2 -20   80.62    6.69
  12   2 -20   91.54    8.01
  14   2 -22    5.09    5.50
  14  -2 -22   -7.93    5.25
  16   2 -24   24.59    6.81
  16  -2 -24   25.71    6.64
  18   2 -26   -2.01    6.65
  27   3 -19    2.69    6.09
  25   3 -17   12.79    5.59
  25  -3 -17    7.14    5.91
  23   3 -15  182.91    9.24
  23  -3 -15  173.80    9.30
  21  -3 -13   17.84    5.30
  21   3 -13   19.71    5.34
  19  -3 -11   19.07    4.99
  19   3 -11   19.88    3.58
  19   3 -11   20.00    4.98
  17   3  -9   40.48    3.84
  17  -3  -9   47.10    5.42
  17   3  -9   37.48    5.10
  15  -3  -7   82.16    6.61
  15   3  -7   75.80    4.97
  15   3  -7   84.28    6.67
  13  -3  -5  231.65    7.94
  13   3  -5  234.69    6.84
  11  -3  -3   98.80    5.64
  11  -3  -3   94.38    2.84
  11   3  -3   94.75    4.72
   9   3  -1   41.06    3.88
   9  -3  -1   37.50    3.47
   9  -3  -1   36.72    2.33
   7   3   1   62.21    4.62
   7  -3   1   67.05    4.36
  -7   3  -1   63.68    2.92
   5  -3   3  271.48    6.52
  -5  -3  -3  261.74    6.84
   5  -3   3  264.38    9.35
  -5   3  -3  265.77    6.31
  -3  -3  -5  718.30   14.58
   3  -3   5  718.61   17.36
   3  -3   5  738.92   13.53
  -3   3  -5  736.42   14.65
   1  -3   7  380.50   11.58
  -1   3  -7  390.24    9.51
  -1  -3  -7  389.56    9.41
   1   3   7  396.78    9.66
  -1  -3  -7  382.97    8.51
   1  -3  -9  238.80    6.35
   1   3  -9  237.54    7.65
  -1  -3   9  230.76    9.56
   1  -3  -9  238.88    7.52
  -3  -3  11   11.83    5.01
   3  -3 -11   13.96    3.50
   3  -3 -11   12.16    2.76
   3   3 -11   12.62    3.54
   5  -3 -13  105.16    6.54
   5  -3 -13   93.61    5.29
   5   3 -13   91.43    6.21
   7   3 -15   22.51    4.65
   7  -3 -15   21.36    3.82
   7  -3 -15   25.15    4.59
   9  -3 -17    9.29    4.21
   9   3 -17    5.16    4.79
   9  -3 -17    6.97    4.67
  11   3 -19   25.60    5.47
  11  -3 -19   18.87    5.11
  13   3 -21   43.19    6.34
  13  -3 -21   43.15    6.22
  15   3 -23    2.64    6.05
  15  -3 -23    3.27    5.75
  17   3 -25    0.06    6.43
  26  -4 -18    9.91    6.41
  26   4 -18   12.90    5.91
  24  -4 -16  171.98    9.56
  24   4 -16  169.78    9.38
  22  -4 -14   40.51    6.00
  22   4 -14   44.18    6.11
  20   4 -12   41.05    4.34
  20   4 -12   35.64    5.41
  20  -4 -12   38.50    5.55
  18   4 -10   69.48    5.69
  18  -4 -10   72.86    6.07
  18   4 -10   65.92    5.82
  16  -4  -8  744.37   17.06
  16   4  -8  707.96   15.75
  16   4  -8  764.82   16.82
  14  -4  -6  696.61   15.71
  14   4  -6  684.99   14.62
  12   4  -4  327.07    8.37
  12  -4  -4  328.47    9.19
  10  -4  -2   58.45    4.96
  10   4  -2   59.93    4.29
   8   4   0  333.46    8.31
   8  -4   0  335.96    8.46
   6  -4   2  555.02   11.44
  -6   4  -2  561.33   10.87
  -6  -4  -2  546.18   11.64
  -4   4  -4  207.32    5.98
   4  -4   4  207.12    5.25
   4  -4   4  200.37    8.35
  -4  -4  -4  194.51    6.16
   2  -4   6  434.23   13.22
  -2  -4  -6  439.08   10.17
   2   4   6  460.44   10.29
  -2   4  -6  446.68   10.32
   0  -4   8  141.95    8.08
   0   4  -8  138.21    6.07
   0  -4  -8  137.17    5.65
   0  -4  -8  138.24    5.25
   2   4 -10   29.07    3.73
   2  -4 -10   32.08    3.65
  -2  -4  10   32.79    5.18
   2  -4 -10   28.61    3.16
   4  -4 -12 1061.35   21.67
   4   4 -12 1054.69   21.98
   4  -4 -12 1059.78   20.52
   6   4 -14   23.11    4.45
   6  -4 -14   24.85    3.93
   6  -4 -14   27.61    4.45
   8  -4 -16  265.40    9.90
   8   4 -16  271.19   10.26
   8  -4 -16  266.53    8.79
  10  -4 -18   21.77    5.06
  10   4 -18   26.01    5.52
  12  -4 -20   21.67    5.55
  12   4 -20   30.88    5.93
  14  -4 -22   -6.11    5.28
  14   4 -22   -0.61    5.59
  16  -4 -24   99.02    8.30
  16   4 -24   99.41    9.51
  18   4 -26   10.19    7.26
  25   5 -17   86.63    7.54
  25  -5 -17   88.30    7.98
  23   5 -15    7.99    5.49
  23  -5 -15    7.26    5.57
  21   5 -13   -3.48    4.75
  21   5 -13    3.11    3.76
  21  -5 -13   -0.78    5.07
  19  -5 -11    9.49    4.91
  19   5 -11    7.48    4.62
  19   5 -11   11.94    3.59
  17   5  -9   13.72    4.79
  17  -5  -9   15.10    4.97
  17   5  -9   19.93    3.70
  15   5  -7   75.69    5.28
  15  -5  -7   93.61    6.91
  13  -5  -5  128.26    6.73
  13   5  -5  118.01    5.79
  11   5  -3    2.53    2.57
  11  -5  -3    4.79    3.40
   9  -5  -1   21.04    3.35
   9   5  -1   15.56    2.75
   7   5   1   93.18    5.25
   7  -5   1   91.00    4.73
  -7   5  -1   87.71    3.26
  -5  -5  -3  665.62   13.70
   5  -5   3  666.39   13.02
  -5   5  -3  669.92   13.16
   5  -5   3  640.10   16.56
   3  -5   5  247.14    9.57
   3  -5   5  244.90    5.63
  -3  -5  -5  245.75    7.11
  -3   5  -5  254.23    7.12
  -1   5  -7  205.02    6.86
  -1  -5  -7  215.80    6.78
   1  -5   7  214.99    9.27
  -1  -5  -7  211.10    6.48
   1   5  -9   -0.19    3.16
  -1  -5   9    1.55    4.51
   1  -5  -9   -3.50    2.80
   1  -5  -9   -0.50    2.84
   3  -5 -11    6.05    3.13
   3   5 -11    3.69    3.50
   3  -5 -11    4.18    3.31
  -3  -5  11   15.58    5.51
   5  -5 -13   25.56    3.97
   5  -5 -13   23.36    4.18
   5   5 -13   23.01    4.41
   7  -5 -15   85.99    7.26
   7   5 -15   74.67    5.96
   7  -5 -15   83.56    6.48
   9  -5 -17   14.51    4.78
   9  -5 -17   22.75    5.06
   9   5 -17   20.07    5.21
  11  -5 -19   26.01    5.44
  11   5 -19   20.38    5.70
  13   5 -21   68.76    7.25
  13  -5 -21   69.96    6.89
  15  -5 -23  114.54    9.53
  15   5 -23  138.62    9.99
  17   5 -25   16.38    7.00
  26   6 -18   -0.22    5.93
  24   6 -16    0.44    5.53
  24  -6 -16   -2.50    5.83
  22   6 -14   63.92    5.53
  22   6 -14   52.56    6.19
  22  -6 -14   61.21    6.79
  20  -6 -12  181.04    9.08
  20   6 -12  193.31    8.80
  20   6 -12  183.41    7.88
  18   6 -10   -0.63    4.42
  18  -6 -10    3.50    4.72
  18   6 -10   -0.56    3.33
  16  -6  -8  198.16    8.73
  16   6  -8  188.40    7.37
  14   6  -6  519.43   12.35
  14  -6  -6  536.49   13.20
  12   6  -4    3.99    2.89
  12  -6  -4    0.75    3.67
  10  -6  -2  197.11    6.95
  10   6  -2  189.11    6.57
   8  -6   0   15.78    3.17
   8   6   0   17.09    2.91
   6  -6   2  363.92    8.62
  -6   6  -2  373.29    8.04
   6  -6   2  364.00   11.65
   6   6   2  368.26    9.64
   4  -6   4  457.81    9.41
  -4  -6  -4  455.91   10.48
   4  -6   4  446.44   13.16
  -4   6  -4  460.62   10.04
   2  -6   6  208.00    9.38
   2  -6   6  208.31    5.05
  -2   6  -6  202.02    6.62
  -2  -6  -6  204.47    6.63
  -2  -6  -6  194.93    6.47
   0  -6  -8  275.52    7.66
   0   6  -8  273.53    8.06
   0  -6   8  263.74   10.71
   0  -6  -8  267.00    7.62
   2  -6 -10   56.13    5.20
  -2  -6  10   41.19    5.98
   2   6 -10   49.80    4.36
   2  -6 -10   51.49    4.12
   4  -6 -12  407.29   10.42
   4   6 -12  411.55   11.49
   4  -6 -12  408.75   10.82
   6  -6 -14  164.16    7.59
   6   6 -14  161.30    8.36
   6  -6 -14  166.88    7.37
   8  -6 -16   72.63    5.76
   8   6 -16   61.75    6.20
   8  -6 -16   72.79    7.06
  10  -6 -18  135.01    8.38
  10   6 -18  137.94    8.82
  10  -6 -18  144.33    8.00
  12   6 -20   24.84    6.17
  12  -6 -20   19.51    5.51
  14   6 -22  124.19    9.67
  14  -6 -22  109.22    9.02
  16   6 -24    1.16    6.58
  25   7 -17    6.88    6.18
  25  -7 -17    8.94    6.77
  23  -7 -15   98.03    8.74
  23   7 -15   92.61    8.11
  21   7 -13  140.82    7.74
  21   7 -13  150.17    8.54
  21  -7 -13  145.85    8.91
  19   7 -11   52.77    4.79
  19   7 -11   56.26    5.79
  19  -7 -11   43.77    5.90
  17   7  -9   24.55    4.03
  17  -7  -9   25.49    5.18
  15   7  -7   91.89    6.14
  15  -7  -7  115.97    7.73
  13  -7  -5  152.48    7.44
  13   7  -5  142.30    6.63
  11  -7  -3   27.36    4.15
  11   7  -3   25.14    3.52
   9   7  -1  360.23    9.30
   9  -7  -1  352.64    9.37
   7  -7   1   81.71    7.46
  -7   7  -1   88.42    3.50
   7  -7   1   82.37    5.06
   7   7   1   93.83    5.46
   5  -7   3   17.94    2.74
   5  -7   3   17.43    4.51
  -5   7  -3   18.13    2.51
   5   7   3   19.14    3.60
   3  -7   5   97.46    7.93
  -3  -7  -5   96.41    5.45
   3  -7   5  100.51    4.16
  -3   7  -5  109.41    5.15
  -1  -7  -7   10.50    3.33
   1  -7   7    9.94    4.58
  -1   7  -7   14.04    3.23
  -1  -7  -7   11.19    3.11
   1  -7   7   11.56    1.93
   1  -7  -9    5.65    3.17
   1   7  -9    4.34    3.37
  -1  -7   9    4.67    5.07
   1  -7  -9    4.79    3.38
  -3  -7  11   -1.72    5.72
   3  -7 -11    2.38    3.64
   3  -7 -11    2.08    3.44
   3   7 -11   -1.10    3.68
   5  -7 -13   51.95    4.80
   5  -7 -13   53.79    5.00
   5   7 -13   55.99    5.38
   7  -7 -15   61.49    5.47
   7   7 -15   57.00    6.14
   7  -7 -15   62.63    5.74
   9   7 -17  308.98   11.46
   9  -7 -17  298.81   10.42
   9  -7 -17  309.72   10.34
  11  -7 -19  172.40    9.02
  11  -7 -19  155.74    8.63
  11   7 -19  159.45    9.57
  13  -7 -21   52.46    6.45
  13   7 -21   67.78    7.51
  15   7 -23   83.63    8.49
  17   7 -25    9.21    7.22
  24  -8 -16   52.15    7.63
  24   8 -16   47.64    6.73
  22   8 -14   14.44    5.57
  22   8 -14   13.04    4.69
  22  -8 -14   12.15    6.01
  20   8 -12   28.02    5.52
  20   8 -12   28.66    4.61
  20  -8 -12   23.66    5.99
  18   8 -10  122.85    6.88
  18  -8 -10  128.51    8.33
  16  -8  -8   12.24    5.15
  16   8  -8   18.00    3.92
  14   8  -6   -0.68    3.64
  14  -8  -6    1.48    4.71
  12   8  -4    4.11    3.49
  12  -8  -4   10.00    4.24
  10  -8  -2   62.37    5.83
  10   8  -2   60.13    5.47
   8   8   0  125.03    6.12
   8  -8   0  123.18    8.33
   8  -8   0  118.01    5.88
  -6   8  -2    3.30    2.15
   6  -8   2    4.23    4.28
   6   8   2    7.68    3.25
   6  -8   2    8.52    2.98
   4  -8   4   29.63    4.99
  -4   8  -4   29.90    3.05
   4  -8   4   29.09    3.02
   2  -8   6   26.83    5.22
   2  -8   6   17.29    2.53
  -2  -8  -6   18.33    3.60
  -2   8  -6   15.17    3.27
  -2  -8  -6   18.07    3.40
   0  -8  -8  523.50   12.27
   0   8  -8  531.11   12.64
   0  -8  -8  536.05   12.28
   0  -8   8  533.74   16.00
  -2  -8  10   60.33    6.89
   2   8 -10   60.97    4.94
   2  -8 -10   57.37    4.79
   2  -8 -10   58.47    4.53
   4  -8 -12  142.95    7.32
   4   8 -12  140.71    7.82
   4  -8 -12  142.39    7.02
  -4  -8  12  140.40   11.44
   6   8 -14  195.17    9.28
   6  -8 -14  197.66    8.23
   6  -8 -14  201.71    8.67
   8  -8 -16   90.89    7.00
   8   8 -16   99.71    8.25
   8  -8 -16   94.13    7.52
  10  -8 -18    6.34    4.78
  10   8 -18   14.78    5.59
  10  -8 -18   19.68    5.81
  12  -8 -20    9.06    6.09
  12   8 -20    2.57    5.82
  12  -8 -20   -1.00    5.28
  14   8 -22  122.18   10.23
  16   8 -24   74.99    8.85
  25   9 -17   -1.88    6.05
  23   9 -15    9.99    5.64
  23   9 -15   19.21    5.24
  23  -9 -15   10.50    6.61
  21   9 -13   96.88    8.07
  21  -9 -13  103.62    8.79
  21   9 -13  108.53    7.35
  19  -9 -11   -1.72    5.40
  19   9 -11    3.44    4.07
  17  -9  -9   46.02    5.96
  17   9  -9   54.25    4.97
  15   9  -7  263.93    8.87
  15  -9  -7  275.19   10.19
  13   9  -5   15.26    4.13
  13  -9  -5   25.62    5.07
  11  -9  -3    5.30    4.16
  11   9  -3    3.20    3.62
   9  -9  -1   39.27    4.30
   9  -9  -1   44.69    5.80
   9   9  -1   40.85    4.12
   7   9   1   29.99    3.74
   7  -9   1   27.64    5.41
   7  -9   1   28.19    3.69
   5   9   3  655.33   14.83
   5  -9   3  656.11   17.98
   5  -9   3  664.22   13.69
  -5   9  -3  657.29   13.58
   3  -9   5   -1.13    4.62
   3  -9   5    2.33    2.71
  -3   9  -5   -2.46    2.84
  -1   9  -7   16.50    3.58
  -1  -9  -7   11.79    3.92
   1  -9   7   11.90    2.57
  -1  -9  -7   15.29    3.61
   1  -9   7   10.59    5.09
  -1  -9   9   48.52    6.65
   1   9  -9   59.26    4.92
   1  -9  -9   55.56    4.51
   1  -9  -9   60.33    5.05
   3  -9 -11   49.78    5.29
   3  -9 -11   54.63    4.81
   3   9 -11   50.73    5.30
  -3  -9  11   52.59    7.53
   5  -9 -13   78.43    6.85
   5   9 -13   71.23    6.27
   5  -9 -13   73.86    6.07
   7   9 -15    0.32    5.04
   7  -9 -15   -0.93    4.41
   7  -9 -15   -4.92    5.25
   9  -9 -17   -2.56    5.28
   9   9 -17    2.09    5.53
   9  -9 -17   -2.38    4.42
  11  -9 -19  186.35    9.60
  11   9 -19  182.06    9.92
  11  -9 -19  174.28    9.06
  13   9 -21   -2.83    6.10
  13  -9 -21    6.37    6.38
  15   9 -23    3.94    6.83
  24 -10 -16   57.21    8.03
  24  10 -16   69.77    6.90
  24  10 -16   65.97    7.18
  22  10 -14   20.37    5.67
  22  10 -14   29.97    5.31
  22 -10 -14   25.98    6.72
  20 -10 -12    8.41    5.96
  20  10 -12   13.58    4.63
  18 -10 -10    3.93    5.50
  18  10 -10    0.14    4.07
  16 -10  -8   69.69    6.38
  16  10  -8   76.44    6.14
  14  10  -6  124.27    7.11
  14 -10  -6  128.63    8.06
  12 -10  -4    9.58    4.96
  12  10  -4    8.37    4.05
  10  10  -2   46.15    4.61
  10 -10  -2   43.85    4.94
  10 -10  -2   47.30    6.67
   8 -10   0   22.86    4.15
   8 -10   0   21.23    5.58
   8  10   0   27.12    3.93
   6  10   2  166.55    7.14
   6 -10   2  151.07    9.08
  -6  10  -2  151.85    5.42
   6 -10   2  155.56    6.59
   4  10   4   -0.53    3.86
   4 -10   4   -1.53    5.33
   4 -10   4    1.48    3.21
  -4  10  -4    2.07    2.86
  -2 -10  -6  995.28   20.30
  -2 -10  -6 1012.08   20.44
  -2  10  -6  986.49   20.12
   2 -10   6  974.38   24.62
   0 -10  -8 1332.06   26.40
   0 -10  -8 1350.32   26.56
   0  10  -8 1353.42   26.85
   0 -10   8 1353.47   32.10
   2 -10 -10  599.30   13.89
   2 -10 -10  594.88   14.26
   2  10 -10  595.51   14.59
  -2 -10  10  566.81   18.41
   4 -10 -12  282.84    9.34
   4 -10 -12  271.76    9.87
   4  10 -12  269.90   10.30
   6 -10 -14   23.63    5.62
   6 -10 -14   10.97    4.69
   6  10 -14   19.67    5.58
   8 -10 -16  277.76    9.93
   8  10 -16  271.79   11.25
   8 -10 -16  288.74   10.51
  10  10 -18  100.92    8.81
  10 -10 -18   87.40    7.69
  10 -10 -18   91.10    8.49
  12  10 -20   71.04    7.85
  12 -10 -20   78.39    7.87
  14  10 -22   39.34    7.74
  23  11 -15   31.10    5.75
  23 -11 -15    7.92    7.02
  23  11 -15   13.72    6.09
  21 -11 -13    8.50    6.42
  21  11 -13   23.16    5.14
  19  11 -11  135.64    7.93
  19 -11 -11  123.38    8.93
  17  11  -9    2.61    4.38
  17 -11  -9   -0.72    5.48
  15  11  -7   57.71    5.20
  15 -11  -7   58.00    6.35
  13  11  -5   22.37    4.61
  13 -11  -5   16.72    5.25
  11 -11  -3  279.73    9.85
  11  11  -3  273.55    9.56
  11 -11  -3  270.68   11.97
   9 -11  -1  176.25   10.40
   9 -11  -1  171.40    7.87
   9  11  -1  167.17    7.41
   7  11   1   13.69    4.07
   7 -11   1   15.71    4.35
   7 -11   1   20.20    5.88
   5 -11   3   -0.76    5.15
   5  11   3   -5.10    3.82
  -5  11  -3    2.29    2.81
   5 -11   3    3.27    3.86
  -3  11  -5  114.38    5.94
   3  11   5  110.08    7.26
  -3 -11  -5  120.94    7.27
   3 -11   5  119.06    5.94
   3 -11   5  112.72    9.32
  -1 -11  -7    1.07    3.88
  -1  11  -7    6.76    3.71
   1 -11   7   -1.80    5.75
  -1 -11  -7    3.42    4.56
   1  11  -9    2.91    4.36
  -1 -11   9   -0.23    6.26
   1 -11  -9    3.03    4.87
   1 -11  -9    2.01    4.02
   3  11 -11   71.97    6.32
  -3 -11  11   86.05    9.80
   3 -11 -11   75.70    6.63
   3 -11 -11   75.35    6.44
   5 -11 -13    3.82    4.41
   5  11 -13    3.16    5.13
   5 -11 -13    4.03    5.33
   7 -11 -15   -5.26    4.60
   7  11 -15   -5.01    5.26
   7 -11 -15   -5.89    5.42
   9 -11 -17   33.12    6.57
   9 -11 -17   31.01    5.77
   9  11 -17   43.48    6.84
  11 -11 -19   20.17    6.73
  11  11 -19   16.47    6.55
  13 -11 -21    1.83    6.90
  13  11 -21    0.54    6.46
  22  12 -14   52.34    6.18
  22  12 -14   42.54    6.63
  22 -12 -14   27.64    7.28
  20 -12 -12    0.30    6.11
  20  12 -12    7.72    4.80
  18 -12 -10    5.25    5.97
  18  12 -10   10.24    4.70
  16  12  -8    1.36    4.19
  16 -12  -8    7.90    5.56
  14 -12  -6    0.68    5.26
  14  12  -6    3.47    4.27
  12 -12  -4    0.57    6.56
  12  12  -4    2.97    4.33
  12 -12  -4    6.90    5.27
  10 -12  -2   26.73    6.66
  10 -12  -2   18.11    5.34
  10  12  -2   23.59    4.77
   8  12   0    1.76    4.19
   8 -12   0    3.98    5.46
   8 -12   0    1.59    4.62
   6 -12   2    8.13    5.65
   6 -12   2    2.34    4.42
   6  12   2   -0.85    4.11
   4  12   4   19.22    4.67
   4 -12   4   22.64    4.28
   4 -12   4   12.87    5.79
  -4  12  -4   14.36    3.49
   2 -12   6   -0.80    6.49
   2  12   6   -2.74    4.54
  -2  12  -6   -1.20    3.70
  -2 -12  -6   -3.61    4.66
   0 -12   8    1.58    6.50
   0 -12  -8   -6.32    4.85
   0  12  -8   -3.03    4.17
   2 -12 -10  106.86    7.94
   2  12 -10  110.30    7.53
  -2 -12  10  106.22    9.68
   2 -12 -10  112.94    7.06
   4 -12 -12  168.89    8.72
   4  12 -12  154.14    8.75
   4 -12 -12  164.70    7.68
   6 -12 -14   51.50    6.33
   6 -12 -14   50.85    5.54
   6  12 -14   49.58    6.47
   8 -12 -16   23.37    6.63
   8 -12 -16    5.83    5.10
   8  12 -16   22.12    6.37
  10 -12 -18    6.14    6.63
  10  12 -18   11.97    6.59
  12  12 -20   77.62    8.48
  12 -12 -20   94.26    8.57
  14  12 -22   43.77    8.15
  14 -12 -22   52.69    8.82
  23  13 -15   -6.30    5.99
  21  13 -13   88.58    7.93
  21 -13 -13   46.97    7.80
  19  13 -11   40.15    5.77
  19 -13 -11   21.70    6.82
  17  13  -9  227.19    9.25
  17 -13  -9  230.19   10.37
  15  13  -7   96.47    6.97
  15 -13  -7   96.42    8.29
  13 -13  -5  167.66    8.90
  13 -13  -5  169.57   11.72
  13  13  -5  161.05    7.70
  11  13  -3  305.34   10.22
  11 -13  -3  318.69   10.77
  11 -13  -3  321.51   12.97
   9 -13  -1   49.87    7.37
   9  13  -1   38.68    5.22
   9 -13  -1   42.78    5.76
   7 -13   1   19.32    5.21
   7  13   1   15.04    4.83
   7 -13   1   21.16    6.28
   5 -13   3    1.75    6.63
   5  13   3   -6.46    4.30
   5 -13   3    8.68    4.74
  -3  13  -5  283.71    9.00
   3 -13   5  294.45    8.96
   3 -13   5  306.69   13.39
   3  13   5  300.85   10.19
   1  13   7  269.94    9.98
  -1 -13  -7  274.46   10.12
  -1  13  -7  261.17    9.18
   1 -13   7  288.97   13.52
   1 -13  -9   -1.50    5.22
   1  13  -9   -4.45    4.49
  -1 -13   9    9.81    8.12
  -3 -13  11    2.61    8.38
   3 -13 -11    1.17    4.42
   3  13 -11    2.77    4.98
   3 -13 -11    9.30    5.49
   5 -13 -13   11.07    5.81
   5  13 -13   -1.14    5.30
   5 -13 -13   -3.14    4.42
   7  13 -15  313.51   12.06
   7 -13 -15  298.80   11.41
   7 -13 -15  321.65   10.67
   9 -13 -17   64.47    7.61
   9  13 -17   54.52    7.54
  11 -13 -19   -6.51    6.93
  11  13 -19    3.44    6.53
  13 -13 -21   54.57    8.92
  13  13 -21   48.97    8.23
  20 -14 -12    7.45    6.95
  20  14 -12   12.11    5.48
  18  14 -10   14.89    5.10
  18 -14 -10   -5.02    6.17
  16 -14  -8   75.14    7.46
  16  14  -8   76.12    6.87
  14 -14  -6   85.75    7.46
  14  14  -6   79.51    6.95
  14 -14  -6   80.07    8.91
  12  14  -4   59.87    5.71
  12 -14  -4   56.32    6.47
  12 -14  -4   62.88    8.06
  10  14  -2    1.35    4.52
  10 -14  -2    2.13    5.29
  10 -14  -2    3.35    6.58
   8  14   0   56.71    5.70
   8 -14   0   71.54    6.31
   8 -14   0   64.58    7.35
   6  14   2  185.81    8.46
   6 -14   2  181.92   12.01
   6 -14   2  190.55    8.30
   4 -14   4  126.17    7.29
   4  14   4  113.16    7.80
   4 -14   4  119.52   10.57
  -2 -14  -6   42.32    5.96
  -2  14  -6   43.12    4.74
   2  14   6   38.46    5.43
   2 -14   6   50.80    8.66
   0 -14   8   37.74    8.90
   0  14  -8   36.92    5.04
   0  14   8   38.14    5.70
   0 -14  -8   38.08    5.95
   2  14 -10  119.74    7.99
   2 -14 -10  110.07    8.28
  -2 -14  10  104.01   10.66
   4 -14 -12   -2.92    5.71
   4  14 -12    3.59    5.44
   4 -14 -12    0.22    4.54
   6  14 -14    3.59    5.74
   6 -14 -14    8.00    6.09
   6 -14 -14   -6.34    4.69
   8  14 -16   30.61    6.92
   8 -14 -16   30.94    6.97
  10 -14 -18   -2.80    6.89
  10  14 -18   -3.38    6.60
  12  14 -20    8.73    7.14
  12 -14 -20    2.17    7.83
  19  15 -11   15.37    5.71
  19 -15 -11    6.82    7.23
  17 -15  -9   32.64    7.25
  17  15  -9   49.63    6.00
  15 -15  -7  184.95   10.23
  15  15  -7  183.32    8.68
  13 -15  -5    4.93    6.98
  13 -15  -5    3.32    5.97
  13  15  -5   11.21    4.99
  11 -15  -3   67.46    6.81
  11  15  -3   61.21    6.00
  11 -15  -3   65.12    8.34
   9  15  -1   26.96    5.14
   9 -15  -1   31.76    5.95
   9 -15  -1   23.98    7.41
   7 -15   1  254.17    9.61
   7 -15   1  267.91   12.88
   7  15   1  256.03    9.69
   5  15   3  499.85   13.41
   5 -15   3  501.87   12.89
   5 -15   3  518.23   18.04
   3 -15   5  -13.14    7.45
   3  15   5   -2.05    4.60
   1 -15   7    5.12    7.65
  -1  15  -7   13.05    4.41
  -1 -15  -7    7.10    5.50
   1  15   7   11.64    5.02
  -1  15   9  297.26   10.37
  -1 -15   9  307.35   15.39
   1 -15  -9  302.94   10.93
   1  15  -9  315.35   10.63
   3 -15 -11   69.90    7.19
  -3  15  11   76.29    6.56
   3  15 -11   74.21    6.76
   5 -15 -13   95.77    7.56
   5 -15 -13   90.55    8.63
   5  15 -13  107.17    8.96
   7 -15 -15   88.32    8.13
   7  15 -15  104.92    9.10
   9 -15 -17    2.44    7.13
   9  15 -17    1.99    6.44
  11 -15 -19   20.65    8.00
  11  15 -19    5.74    7.21
  18  16 -10   47.96    6.35
  18 -16 -10   34.78    7.80
  16 -16  -8    7.05    6.96
  16  16  -8   19.98    5.42
  14  16  -6   23.25    5.43
  14 -16  -6   17.22    6.96
  12  16  -4  150.47    8.44
  12 -16  -4  149.89    9.52
  10  16  -2   46.91    5.88
  10 -16  -2   49.47    8.14
  10 -16  -2   47.05    6.61
   8 -16   0  377.24   11.83
   8  16   0  367.75   11.79
   8 -16   0  391.07   15.91
   6 -16   2  379.85   15.57
   6 -16   2  333.36   10.74
   6  16   2  321.87   10.98
   4 -16   4  164.69   13.11
   4  16   4  162.28    8.43
  -2 -16  -6  121.73    8.44
   2 -16   6  123.88   13.03
   2  16   6  128.54    7.76
   0  16   8   -3.06    4.97
   0 -16   8    0.12    8.32
   0 -16  -8    0.58    5.80
   0  16  -8    6.56    4.76
   2  16 -10   83.14    7.79
   2 -16 -10   65.57    7.19
  -2 -16  10   71.68   12.12
  -2  16  10   72.20    6.54
  -4  16  12   57.47    6.29
   4  16 -12   52.40    6.78
   4 -16 -12   46.86    7.24
   6 -16 -14   13.86    6.95
   6  16 -14   14.26    6.48
   8  16 -16   26.21    7.02
   8 -16 -16   12.90    7.18
  10  16 -18  242.38   12.37
  10 -16 -18  214.98   12.13
  17 -17  -9   50.61    8.56
  17  17  -9   67.04    6.77
  15  17  -7  133.42    8.22
  15 -17  -7  135.97   10.28
  13  17  -5   49.68    6.22
  13 -17  -5   48.35    7.58
  11  17  -3   26.16    5.69
  11 -17  -3   23.78    6.64
   9  17  -1    5.49    5.26
   9 -17  -1   -6.59    7.61
   9 -17  -1    8.93    6.04
   7  17   1   43.58    5.95
   7 -17   1   38.06    6.34
   7 -17   1   31.35    8.50
   5 -17   3  106.31   11.38
   5  17   3  111.62    8.10
   3  17   5  199.47    9.18
   3 -17   5  206.28   14.49
   1 -17   7  219.77   14.81
  -1 -17  -7  166.94    9.39
   1  17   7  203.54    9.13
   1  17  -9   61.60    6.18
  -1 -17   9   32.95   11.35
  -1  17   9   50.47    6.16
   1 -17  -9   55.64    7.20
   3 -17 -11   17.01    6.65
  -3  17  11   18.96    5.57
   3  17 -11   23.07    5.68
   5  17 -13    8.22    6.20
   5 -17 -13   -3.55    6.83
   7 -17 -15   37.25    7.74
   7  17 -15   50.16    7.62
   9 -17 -17   48.67    8.58
   9  17 -17   58.00    8.26
  16  18  -8  244.69   10.38
  16 -18  -8  210.12   12.25
  14 -18  -6  487.75   15.77
  12  18  -4   13.10    5.71
  12 -18  -4    7.12    6.82
  10  18  -2   57.09    6.44
  10 -18  -2   56.39    7.32
   8  18   0  121.25    8.32
   8 -18   0  102.05    8.62
   6 -18   2    4.23    8.50
   6  18   2    3.55    5.30
   4 -18   4  -10.34    8.51
   4  18   4   -4.96    5.11
   2  18   6  141.70    8.27
   2 -18   6  135.79   14.00
   0  18   8    7.13    5.22
   0 -18   8   -9.75    9.33
   0 -18  -8    5.26    6.31
  -2  18  10    2.97    5.41
   2  18 -10   24.02    5.77
   2 -18 -10   -4.37    6.45
   4  18 -12  220.75   10.32
   4 -18 -12  195.20   10.87
   6 -18 -14    1.85    7.45
   6  18 -14    4.57    6.43
   8 -18 -16    7.49    7.89
   8  18 -16   12.96    7.12
  15 -19  -7    2.56    8.02
  15  19  -7   25.14    6.04
  13  19  -5   27.13    6.09
  13 -19  -5    2.81    7.39
  11 -19  -3    2.75    6.96
  11  19  -3   19.33    5.96
   9  19  -1    5.50    5.58
   9 -19  -1   -2.40    6.56
   7  19   1   48.16    6.55
   5  19   3   19.27    5.76
   3 -19   5   -7.76    9.66
   3  19   5    6.16    5.58
   1  19   7    8.27    5.51
  -1 -19  -7    1.21    6.55
   1 -19   7  -26.26   10.17
  -1  19   9    0.12    5.45
   1 -19  -9   -5.86    6.46
   3 -19 -11   -1.36    6.87
   5 -19 -13   -7.49    7.20
   5  19 -13    4.99    6.30
   7 -19 -15    8.98    8.17
   7  19 -15   20.21    7.25
  14 -20  -6   -1.37    8.07
  12  20  -4   32.64    6.39
  12 -20  -4   13.24    7.88
  10 -20  -2   31.99    7.64
  10  20  -2   47.93    6.65
   8  20   0   93.87    8.32
   6  20   2   24.20    6.21
   4  20   4   -4.92    5.58
   2 -20   6  -12.20   10.61
   2  20   6   10.46    5.75
   0 -20   8   -4.87   13.00
   0 -20  -8   50.03    7.71
   0  20   8   60.07    6.66
   2 -20 -10   -3.36    7.10
   4 -20 -12   11.59    7.73
   6  20 -14    3.26    6.87
  11 -21  -3    3.22    7.75
  11  21  -3   13.73    6.03
   9  21  -1   49.34    6.92
   7  21   1   77.10    7.43
   5  21   3   22.68    6.45
   3  21   5    5.18    6.01
   1  21   7   29.55    6.48
   1 -21  -9  117.25   10.20
   8  22   0   76.59    7.80
   6  22   2   33.31    6.80
   4  22   4   11.76    6.56
  26   0 -17    3.77    5.62
  24   0 -15    6.81    5.30
  22   0 -13   -4.39    4.76
  20   0 -11   -8.36    4.40
  18   0  -9    1.61    4.64
  16   0  -7   -0.49    4.01
  16   0  -7   -3.32    2.20
  14   0  -5    1.03    3.48
  14   0  -5   -1.72    1.89
  12   0  -3    2.77    3.11
  12   0  -3   -0.32    1.82
  10   0  -1   -1.33    2.80
  10   0  -1   -2.92    1.75
  -8   0  -1   -0.16    1.81
  -6   0  -3   -2.94    1.89
  -4   0  -5    0.05    2.22
   4   0   5    0.33    2.95
  -2   0  -7   -1.57    2.56
   2   0   7   -2.17    3.12
   0   0   9    1.15    3.60
   0   0  -9   -0.02    2.86
  -2   0  11   -0.84    4.04
   2   0 -11   -2.75    1.77
   2   0 -11   -4.27    3.12
   4   0 -13    1.33    2.15
   4   0 -13   -3.28    3.40
   6   0 -15    4.40    4.15
   8   0 -17   -4.98    4.52
  10   0 -19   -4.80    4.76
  12   0 -21    3.77    5.50
  14   0 -23   -8.22    5.56
  16   0 -25  -13.85    6.04
  27   1 -18   29.12    6.72
  27  -1 -18   27.35    6.82
  25  -1 -16   24.30    6.10
  25   1 -16   28.94    6.11
  23   1 -14   43.37    6.05
  23  -1 -14   47.54    6.14
  21   1 -12    9.69    4.88
  21  -1 -12   -0.42    4.75
  19  -1 -10   13.58    4.90
  19   1 -10   15.67    4.94
  17   1  -8  936.90   20.12
  17   1  -8  905.03   18.45
  17  -1  -8  922.36   20.10
  15   1  -6 1054.91   21.68
  15  -1  -6 1049.15   21.76
  15   1  -6 1063.13   20.38
  13   1  -4   46.90    4.18
  13  -1  -4   46.32    3.25
  13  -1  -4   55.71    4.36
  13   1  -4   47.31    3.96
  11   1  -2   66.09    3.83
  11  -1  -2   65.91    5.40
  11  -1  -2   64.47    3.39
   9   1   0  376.17    8.74
   9  -1   0  388.38    9.29
   9  -1   0  383.95    8.35
  -7  -1  -2  309.42    7.38
  -7   1  -2  309.71    7.06
   7  -1   2  318.46    7.60
  -5  -1  -4    6.97    2.29
  -5   1  -4    8.24    2.24
  -3  -1  -6   22.66    2.91
   3   1   6   21.16    3.49
   3  -1   6   20.17    3.51
  -3   1  -6   20.66    2.79
   1  -1   8  209.12    8.66
  -1  -1  -8  213.93    6.83
   1   1   8  205.71    7.61
  -1   1  -8  206.73    6.94
   1   1 -10  409.32   10.43
  -1  -1  10  400.34   12.18
   1  -1 -10  392.63    8.33
   1  -1 -10  400.93   10.20
  -1   1  10  393.22   11.25
   3   1 -12  352.65   10.10
   3  -1 -12  356.75    9.95
   3  -1 -12  342.49    7.83
   5   1 -14   55.75    5.07
   5  -1 -14   56.42    4.40
   5  -1 -14   57.04    4.99
   7  -1 -16    1.22    4.32
   7   1 -16   -2.31    4.43
   9  -1 -18   16.45    5.11
   9   1 -18   13.49    5.13
  11   1 -20   22.95    5.62
  11  -1 -20   19.26    5.47
  13   1 -22   43.95    6.60
  13  -1 -22   41.89    6.53
  15  -1 -24   11.59    6.33
  15   1 -24    4.67    6.10
  17   1 -26    5.78    6.96
  17  -1 -26   -1.92    6.85
  26   2 -17  103.74    9.07
  26  -2 -17  103.46    8.88
  24   2 -15   85.14    7.07
  24  -2 -15   85.82    7.34
  22   2 -13   14.98    5.46
  22  -2 -13   12.74    5.27
  20   2 -11   40.91    5.47
  20  -2 -11   31.95    5.24
  18   2  -9   68.87    5.08
  18   2  -9   67.04    5.85
  18  -2  -9   74.22    6.08
  16  -2  -7   -2.65    4.05
  16   2  -7    1.62    4.02
  16   2  -7   -1.03    2.52
  14   2  -5   90.39    4.69
  14  -2  -5   89.59    6.37
  14   2  -5   95.80    6.13
  12  -2  -3  663.29   14.66
  12  -2  -3  703.85   12.94
  12   2  -3  657.31   13.76
  10  -2  -1   69.24    5.01
  10  -2  -1   67.64    3.13
  10   2  -1   69.86    4.12
  -8   2  -1  271.24    6.20
   8  -2   1  271.18    7.37
  -6  -2  -3  511.98   10.89
   6  -2   3  519.84   10.66
  -6   2  -3  512.47   10.53
  -4  -2  -5  449.60   10.04
  -4   2  -5  441.10    9.89
   4  -2   5  458.43    9.09
   4  -2   5  446.63   12.51
  -2  -2  -7   74.42    5.01
   2  -2   7   72.67    2.74
  -2   2  -7   73.69    5.00
   2   2   7   71.33    5.58
   2  -2   7   76.71    6.63
   0   2  -9  201.48    7.13
   0  -2  -9  197.18    5.60
   0   2   9  207.80    7.53
   0  -2   9  198.53    8.70
   0  -2  -9  204.22    7.12
   2  -2 -11  631.23   14.25
   2  -2 -11  628.09   12.53
   2   2 -11  625.15   14.39
  -2  -2  11  611.45   16.59
   4  -2 -13  397.72   11.06
   4   2 -13  395.84   11.17
   4  -2 -13  405.34    9.18
   6  -2 -15    2.54    3.28
   6   2 -15    4.95    4.14
   6  -2 -15    5.49    4.14
   8   2 -17   70.72    6.28
   8  -2 -17   70.18    6.11
  10  -2 -19    5.74    4.81
  10   2 -19   -2.06    4.77
  12  -2 -21   73.66    6.86
  12   2 -21   69.17    6.98
  14  -2 -23   69.68    7.32
  14   2 -23   74.31    7.59
  16  -2 -25   -9.12    6.15
  16   2 -25   -6.97    6.12
  27   3 -18   25.07    6.81
  25  -3 -16   12.13    5.85
  25   3 -16    8.74    5.75
  23   3 -14  185.00    9.36
  23  -3 -14  187.33    9.43
  21   3 -12  244.18    9.70
  21  -3 -12  240.78    9.87
  19  -3 -10  137.36    8.01
  19   3 -10  146.89    6.40
  19   3 -10  135.56    7.86
  17  -3  -8  117.73    7.81
  17   3  -8  110.59    7.67
  17   3  -8  118.26    5.91
  15  -3  -6   27.10    4.47
  15   3  -6   26.21    3.14
  15   3  -6   34.59    4.54
  13   3  -4   14.83    2.71
  13  -3  -4   13.06    3.76
  11  -3  -2   34.20    3.76
  11   3  -2   35.25    3.00
  11  -3  -2   36.53    2.47
   9   3   0    9.57    2.49
   9  -3   0   11.42    3.08
  -7  -3  -2   20.12    2.55
  -7   3  -2   17.75    2.05
   7  -3   2   12.11    2.83
  -5   3  -4  519.26   10.84
   5  -3   4  514.93   13.85
  -5  -3  -4  526.20   11.23
   5  -3   4  526.14   10.58
  -3  -3  -6  272.39    7.53
   3  -3   6  281.99    9.75
  -3   3  -6  265.82    7.43
   3   3   6  277.28    7.92
   3  -3   6  277.13    5.99
   1   3   8   -0.16    2.78
  -1  -3  -8    1.60    2.82
  -1  -3  -8    1.49    2.40
  -1   3  -8   -0.37    3.00
   1  -3   8   -2.94    3.77
   1  -3 -10  189.13    5.83
  -1  -3  10  195.10    9.20
   1   3 -10  196.04    7.24
   1  -3 -10  184.94    7.08
  -3  -3  12   64.99    6.84
   3  -3 -12   63.55    4.64
   3  -3 -12   73.40    6.10
   3   3 -12   63.45    5.99
   5   3 -14   22.72    4.47
   5  -3 -14   17.08    4.31
   5  -3 -14   21.14    3.55
   7  -3 -16   40.87    4.34
   7   3 -16   30.91    5.09
   7  -3 -16   36.99    5.22
   9   3 -18   35.55    5.67
   9  -3 -18   35.63    5.46
  11   3 -20   14.46    5.47
  11  -3 -20    9.57    5.27
  13   3 -22   -8.24    5.32
  13  -3 -22   -8.97    5.40
  15   3 -24    7.45    6.41
  15  -3 -24   -6.63    5.94
  17   3 -26   68.84    8.59
  26   4 -17    1.91    5.90
  26  -4 -17    6.04    6.18
  24   4 -15   12.19    5.72
  24  -4 -15   19.48    5.79
  22   4 -13   17.75    5.46
  22  -4 -13   21.24    5.63
  20   4 -11    1.75    4.67
  20   4 -11    7.66    3.22
  20  -4 -11    3.25    4.87
  18   4  -9  211.79    8.80
  18   4  -9  200.02    7.48
  18  -4  -9  202.81    8.90
  16   4  -7   91.95    7.30
  16  -4  -7   94.21    7.35
  16   4  -7   94.06    5.47
  14   4  -5  113.32    5.65
  14  -4  -5  110.14    6.92
  12  -4  -3  579.37   13.17
  12   4  -3  571.03   12.51
  10  -4  -1  115.80    5.62
  10   4  -1  108.84    5.17
   8   4   1  450.56   10.63
   8  -4   1  462.25   10.42
   6  -4   3  282.10    7.03
  -6  -4  -3  285.93    7.54
  -6   4  -3  280.05    6.70
   6  -4   3  274.51   10.12
   4  -4   5  410.02   12.32
  -4   4  -5  422.59    9.70
   4  -4   5  430.58    8.63
  -4  -4  -5  414.45    9.79
   2  -4   7 1793.19   38.93
  -2  -4  -7 1833.72   34.13
   2   4   7 1879.63   36.85
  -2   4  -7 1824.54   34.22
   0  -4   9    7.59    4.46
   0   4   9   -1.51    2.56
   0  -4  -9    2.08    2.98
   0   4  -9   -0.75    3.09
   0  -4  -9   -2.19    2.60
   2   4 -11  441.39   11.49
   2  -4 -11  441.72   10.07
  -2  -4  11  425.71   13.90
   2  -4 -11  452.40   11.19
   4  -4 -13   41.59    3.91
   4   4 -13   40.35    4.80
   4  -4 -13   43.57    4.58
   6  -4 -15  301.03    8.81
   6   4 -15  286.16   10.31
   6  -4 -15  299.59   10.11
   8   4 -17  272.59   10.59
   8  -4 -17  279.73    9.09
   8  -4 -17  278.47   10.36
  10   4 -19   82.29    6.94
  10  -4 -19   80.51    7.75
  12   4 -21  181.71   10.04
  12  -4 -21  189.31    9.79
  14  -4 -23  114.74    9.50
  14   4 -23  108.73    9.53
  16   4 -25   23.75    7.19
  16  -4 -25   15.91    6.79
  25  -5 -16   -0.19    6.04
  25   5 -16    1.12    5.69
  23   5 -14   20.03    5.70
  23  -5 -14   38.71    6.25
  21   5 -12   51.26    6.02
  21  -5 -12   36.86    5.86
  21   5 -12   49.41    4.62
  19   5 -10   74.28    5.83
  19  -5 -10   70.06    6.15
  19   5 -10   76.40    6.14
  17  -5  -8   54.04    5.78
  17   5  -8   51.99    5.46
  17   5  -8   53.87    4.33
  15   5  -6   24.41    3.55
  15  -5  -6   23.34    4.72
  13   5  -4  230.39    7.41
  13  -5  -4  225.16    8.24
  11  -5  -2   -5.04    3.28
  11   5  -2   -1.13    2.57
   9  -5   0  267.69    7.72
   9   5   0  262.46    7.50
   7  -5   2   29.68    3.11
   7   5   2   30.00    3.56
  -7   5  -2   29.34    2.25
   5  -5   4   88.53    7.09
  -5  -5  -4   90.14    4.77
   5  -5   4   83.21    4.12
  -5   5  -4   85.44    4.41
   3  -5   6  237.03    9.75
   3   5   6  256.98    6.79
  -3   5  -6  252.84    7.44
  -3  -5  -6  246.09    7.31
  -1  -5  -8   -3.27    2.75
  -1   5  -8   -1.69    2.97
   1  -5   8    0.82    4.26
  -1  -5  -8    0.93    2.91
   1   5   8    1.64    2.04
   1  -5 -10   26.79    3.62
   1   5 -10   26.31    3.89
   1  -5 -10   24.63    3.47
  -1  -5  10   30.91    5.47
  -3  -5  12  236.52   11.43
   3  -5 -12  243.95    7.49
   3   5 -12  239.78    8.68
   3  -5 -12  248.59    8.45
   5  -5 -14  231.16    7.89
   5  -5 -14  229.46    8.82
   5   5 -14  226.36    9.14
   7   5 -16  147.89    8.63
   7  -5 -16  152.22    8.26
   7  -5 -16  133.29    7.37
   9   5 -18  278.11   11.06
   9  -5 -18  296.71   10.79
  11  -5 -20   -0.16    5.10
  11   5 -20    4.45    5.46
  13   5 -22   33.28    6.77
  13  -5 -22   18.38    6.13
  15  -5 -24   34.04    7.05
  15   5 -24   37.51    7.42
  17   5 -26   -3.78    6.87
  26   6 -17    0.58    6.08
  26  -6 -17    1.40    6.54
  24  -6 -15  113.01    8.85
  24   6 -15   98.25    8.44
  22  -6 -13  136.86    8.82
  22   6 -13  147.08    8.68
  20   6 -11    8.22    5.03
  20   6 -11    8.87    3.66
  20  -6 -11    3.66    5.07
  18   6  -9  105.55    7.48
  18   6  -9  111.46    6.36
  18  -6  -9  109.35    7.54
  16  -6  -7  130.03    7.73
  16   6  -7  129.99    6.56
  14  -6  -5   63.76    5.28
  14   6  -5   54.12    4.25
  12  -6  -3    2.47    3.67
  12   6  -3    9.49    3.11
  10   6  -1  235.73    7.29
  10  -6  -1  229.13    7.56
   8  -6   1   38.88    3.51
  -8   6  -1   31.18    2.64
   8   6   1   44.64    3.63
  -6   6  -3   -1.11    2.19
   6  -6   3    0.37    2.49
   6  -6   3    1.70    4.10
   4  -6   5    4.99    2.06
  -4  -6  -5    4.41    2.87
  -4   6  -5    1.90    2.72
   4  -6   5    2.35    4.16
  -2  -6  -7   49.88    4.80
   2  -6   7   49.64    2.89
  -2   6  -7   52.69    5.04
   2  -6   7   53.27    5.53
  -2  -6  -7   50.02    3.88
   0  -6  -9   50.01    4.04
   0  -6   9   49.79    5.93
   0   6  -9   46.91    4.14
   0  -6  -9   51.89    4.92
   2   6 -11   48.54    4.63
  -2  -6  11   56.42    6.56
   2  -6 -11   49.36    4.40
   2  -6 -11   49.30    4.27
   4  -6 -13   77.52    6.10
   4  -6 -13   81.99    6.40
   4   6 -13   71.27    5.61
   6  -6 -15    8.68    4.54
   6  -6 -15   16.26    4.68
   6   6 -15   10.68    4.97
   8  -6 -17   70.09    5.81
   8  -6 -17   68.99    6.05
   8   6 -17   73.42    6.60
  10   6 -19   14.69    5.61
  10  -6 -19   13.39    5.22
  12   6 -21   59.64    7.31
  12  -6 -21   65.72    6.86
  14   6 -23   54.13    7.73
  14  -6 -23   50.02    7.08
  16   6 -25   93.82    9.22
  25  -7 -16   14.84    6.91
  25   7 -16   10.33    5.99
  23   7 -14   30.48    6.03
  23  -7 -14   31.42    6.37
  21   7 -12   65.63    6.20
  21   7 -12   50.42    6.09
  21  -7 -12   57.98    6.67
  19  -7 -10   51.40    5.94
  19   7 -10   55.28    4.78
  19   7 -10   54.92    5.79
  17  -7  -8    1.75    4.89
  17   7  -8    4.10    3.53
  15  -7  -6  374.66   11.16
  15   7  -6  352.37   10.15
  13   7  -4  134.82    6.55
  13  -7  -4  142.55    7.48
  11  -7  -2  484.79   11.89
  11   7  -2  481.38   11.57
   9   7   0   12.10    3.20
   9  -7   0   11.41    3.45
   7  -7   2  225.84    6.79
  -7   7  -2  223.37    5.78
   7   7   2  223.08    7.62
   7  -7   2  219.27   10.24
  -5   7  -4  453.96   10.05
   5  -7   4  445.44    9.67
  -5  -7  -4  448.05   10.65
   5  -7   4  443.46   13.58
   3  -7   6 2184.07   46.43
  -3   7  -6 2207.31   40.30
  -3  -7  -6 2158.49   40.33
  -1  -7  -8 1022.78   20.26
  -1  -7  -8 1045.99   20.62
  -1   7  -8 1014.57   20.81
   1  -7   8 1013.04   24.74
  -1  -7  10   62.25    6.52
   1   7 -10   69.23    5.90
   1  -7 -10   56.20    4.58
   1  -7 -10   59.20    5.57
   3  -7 -12  657.29   14.71
   3  -7 -12  665.89   15.15
   3   7 -12  646.17   15.65
  -3  -7  12  664.68   19.93
   5  -7 -14   47.63    5.22
   5   7 -14   31.80    5.28
   5  -7 -14   36.70    4.98
   7  -7 -16  454.72   12.25
   7   7 -16  452.02   13.64
   7  -7 -16  451.20   12.57
   9  -7 -18   57.27    5.99
   9  -7 -18   50.72    5.76
   9   7 -18   49.21    6.39
  11  -7 -20   42.78    6.16
  11   7 -20   64.33    7.13
  13   7 -22   21.73    6.72
  13  -7 -22   15.16    5.97
  15   7 -24  111.62    9.58
  26   8 -17    7.87    6.21
  24  -8 -15  120.31    9.61
  24   8 -15  102.49    8.71
  22   8 -13  192.09    8.53
  22   8 -13  192.29    9.54
  22  -8 -13  166.73    9.85
  20   8 -11  314.06   10.20
  20  -8 -11  307.49   11.36
  20   8 -11  322.98   11.07
  18   8  -9  468.62   12.20
  18  -8  -9  480.31   13.45
  16  -8  -7  192.97    9.04
  16   8  -7  185.26    7.53
  14   8  -5  163.38    7.40
  14  -8  -5  174.91    8.46
  12   8  -3  100.78    6.36
  12  -8  -3   93.23    6.67
  10  -8  -1   66.81    5.92
  10   8  -1   68.12    5.61
   8  -8   1   95.07    8.04
   8   8   1   95.54    5.68
   8  -8   1   88.31    5.46
  -6   8  -3  395.47    9.01
   6  -8   3  393.91   12.96
   6  -8   3  396.61    9.34
   6   8   3  410.65   10.68
  -4   8  -5  216.56    6.78
   4  -8   5  216.05   10.04
   4  -8   5  220.39    6.28
  -4  -8  -5  228.03    7.42
   2  -8   7  139.18    9.09
  -2  -8  -7  145.61    6.64
  -2   8  -7  145.95    6.32
  -2  -8  -7  139.03    6.31
   0  -8  -9  369.49    9.87
   0  -8   9  353.15   13.28
   0  -8  -9  366.84    9.83
   0   8  -9  351.71   10.02
   2  -8 -11   21.22    4.13
   2  -8 -11   14.60    4.33
   2   8 -11   18.82    4.38
  -2  -8  11   23.51    6.28
  -4  -8  13  235.02   13.41
   4  -8 -13  230.31    8.62
   4  -8 -13  221.60    8.68
   4   8 -13  220.45    9.36
   6   8 -15  150.16    8.90
   6  -8 -15  155.32    8.21
   6  -8 -15  162.82    7.97
   8   8 -17   64.27    6.55
   8  -8 -17   63.02    5.85
   8  -8 -17   69.62    6.21
  10   8 -19   53.78    6.93
  10  -8 -19   53.54    6.19
  10  -8 -19   63.34    6.52
  12   8 -21    0.31    6.13
  12  -8 -21    1.62    5.54
  14   8 -23  100.47    9.01
  25   9 -16   38.80    6.85
  23   9 -14   13.05    4.87
  23   9 -14   -1.19    5.58
  23  -9 -14   -0.27    6.14
  21  -9 -12   95.09    8.53
  21   9 -12   99.00    8.17
  21   9 -12   96.21    7.08
  19  -9 -10   -3.12    5.33
  19   9 -10    3.36    3.97
  17  -9  -8   13.49    5.34
  17   9  -8    5.81    3.88
  15   9  -6   44.88    4.84
  15  -9  -6   46.73    5.90
  13  -9  -4  271.28    9.60
  13   9  -4  245.32    8.80
  11   9  -2  403.99   10.88
  11  -9  -2  395.77   11.01
   9  -9   0   56.22    6.09
   9   9   0   49.30    4.41
   9  -9   0   53.20    4.58
   7  -9   2   20.16    5.64
   7   9   2   14.85    3.78
   7  -9   2   18.26    3.59
   5   9   4  101.93    6.49
  -5   9  -4   93.40    4.93
   5  -9   4   89.06    5.17
   5  -9   4   95.63    8.23
  -3  -9  -6  111.28    6.24
   3  -9   6  112.73    8.90
  -3   9  -6  117.51    5.76
   3  -9   6  118.76    5.03
  -1  -9  -8   -6.28    3.93
  -1   9  -8    0.35    3.58
  -1  -9  -8    0.72    3.51
   1  -9   8   -1.70    5.29
   1   9 -10    2.12    3.99
   1  -9 -10    6.86    3.89
  -1  -9  10    2.32    5.85
   1  -9 -10    5.50    4.44
  -3  -9  12  442.62   16.26
   3  -9 -12  407.40   11.61
   3  -9 -12  425.92   11.58
   3   9 -12  424.19   12.28
   5  -9 -14  143.32    7.86
   5  -9 -14  128.19    8.01
   5   9 -14  137.18    8.56
   7  -9 -16    7.61    4.71
   7  -9 -16    5.75    5.36
   7   9 -16   11.61    5.49
   9  -9 -18  139.90    8.70
   9  -9 -18  142.45    8.37
   9   9 -18  139.68    9.41
  11  -9 -20    5.89    6.21
  11  -9 -20   -4.90    5.33
  11   9 -20    7.87    6.14
  13   9 -22   41.89    7.59
  15   9 -24   -1.74    7.01
  24 -10 -15   64.39    8.24
  24  10 -15   88.19    8.07
  24  10 -15   61.76    7.15
  22  10 -13   35.02    5.29
  22 -10 -13   28.44    6.77
  22  10 -13   23.07    5.95
  20 -10 -11   26.96    6.39
  20  10 -11   33.72    5.14
  18 -10  -9  292.77   10.81
  18  10  -9  274.56    9.45
  16  10  -7  350.07   10.59
  16 -10  -7  389.97   11.79
  14  10  -5   45.44    4.93
  14 -10  -5   52.48    5.91
  12  10  -3  409.61   11.60
  12 -10  -3  433.30   11.79
  10 -10  -1   74.84    6.51
  10 -10  -1   72.79    6.91
  10  10  -1   74.08    6.05
   8  10   1  151.26    7.29
   8 -10   1  139.00    9.11
   8 -10   1  143.15    6.74
   6  10   3  578.08   13.78
   6 -10   3  562.23   16.62
   6 -10   3  568.46   12.73
  -4  10  -5   23.98    3.67
   4  10   5   18.95    4.60
   4 -10   5   18.15    5.77
   4 -10   5   30.39    3.65
   2 -10   7   16.98    6.34
  -2 -10  -7    9.45    4.38
  -2  10  -7    9.78    3.85
  -2 -10  -7   14.72    3.91
   0 -10   9 1033.53   26.56
   0  10  -9 1080.57   22.20
   0 -10  -9 1035.03   21.49
   0 -10  -9 1039.15   21.64
   2 -10 -11  159.34    8.24
   2 -10 -11  158.02    7.65
   2  10 -11  157.89    8.33
  -2 -10  11  160.67   11.73
   4 -10 -13  184.49    8.80
   4 -10 -13  195.07    8.65
   4  10 -13  202.33    9.67
   6  10 -15  646.28   16.90
   6 -10 -15  641.15   15.83
   6 -10 -15  647.58   15.66
   8 -10 -17  246.11    9.87
   8 -10 -17  257.61   10.35
   8  10 -17  252.26   11.15
  10 -10 -19   -3.81    5.29
  10 -10 -19    1.87    6.06
  10  10 -19    2.14    6.04
  12  10 -21   89.18    8.57
  14  10 -23   59.22    8.40
  23  11 -14   45.06    6.66
  23  11 -14   60.22    6.15
  23 -11 -14   46.15    7.66
  21  11 -12   18.59    4.93
  21 -11 -12   -5.79    6.10
  19  11 -10    9.22    4.46
  19 -11 -10   -2.12    5.72
  17 -11  -8    1.78    5.41
  17  11  -8    3.92    4.19
  15 -11  -6   15.07    5.41
  15  11  -6   16.64    4.49
  13  11  -4   99.90    7.04
  13 -11  -4  102.12    7.77
  11 -11  -2   38.14    6.70
  11 -11  -2   36.73    5.36
  11  11  -2   36.41    4.99
   9 -11   0    7.89    4.59
   9  11   0    3.50    4.17
   9 -11   0    6.69    5.54
   7 -11   2   49.03    4.81
   7  11   2   43.32    4.79
   7 -11   2   52.17    6.39
  -5  11  -4   15.87    3.38
   5 -11   4   21.90    4.03
   5  11   4   14.09    4.54
   5 -11   4   15.01    5.93
  -3  11  -6    2.75    3.55
   3 -11   6   -0.63    5.64
   3  11   6    1.27    4.69
  -1 -11  -8  140.78    7.19
   1 -11   8  115.89   10.40
  -1  11  -8  137.14    7.44
  -1 -11  -8  131.26    7.79
   1 -11 -10  220.58    8.40
  -1 -11  10  209.55   12.49
   1 -11 -10  218.40    8.94
   1  11 -10  202.09    9.16
  -3 -11  12    9.01    8.12
   3 -11 -12    8.95    4.63
   3  11 -12   12.23    5.17
   3 -11 -12   22.26    5.63
   5  11 -14   58.79    6.61
   5 -11 -14   64.76    6.52
   5 -11 -14   60.33    5.73
   7 -11 -16    9.60    5.74
   7  11 -16    6.28    5.62
   7 -11 -16    1.59    4.88
   9 -11 -18   67.58    7.33
   9  11 -18   64.31    7.61
   9 -11 -18   63.86    6.53
  11  11 -20   58.90    7.82
  11 -11 -20   51.54    7.60
  13  11 -22   10.03    7.28
  24  12 -15   86.78    8.22
  24  12 -15   70.72    7.71
  22 -12 -13   41.94    7.49
  22  12 -13   60.29    6.15
  20 -12 -11   15.88    6.40
  20  12 -11   29.75    5.41
  18  12  -9   10.02    4.69
  18 -12  -9   -0.80    5.83
  16  12  -7  376.65   11.32
  16 -12  -7  377.17   12.24
  14 -12  -5  105.45    8.00
  14  12  -5   99.16    7.03
  12 -12  -3  173.42   11.79
  12  12  -3  178.68    8.30
  12 -12  -3  197.35    8.74
  10 -12  -1    0.58    6.16
  10 -12  -1   -0.42    5.04
  10  12  -1    1.94    4.40
   8 -12   1   24.78    6.37
   8  12   1   17.20    4.72
   8 -12   1   27.22    5.03
   6 -12   3  839.07   17.71
   6  12   3  827.44   18.57
   6 -12   3  844.61   22.50
   4 -12   5   19.72    6.52
  -4  12  -5   30.09    4.10
   4  12   5   33.07    5.24
   4 -12   5   38.74    4.47
   2 -12   7   41.36    7.28
   2  12   7   52.76    5.94
  -2  12  -7   42.81    4.78
  -2 -12  -7   48.44    5.67
   0 -12   9  448.21   16.62
   0 -12  -9  463.12   12.74
   0  12  -9  420.47   12.23
   0 -12  -9  463.56   12.10
   2  12 -11   -0.24    4.79
  -2 -12  11   -0.22    7.46
   2 -12 -11    3.48    5.35
   2 -12 -11    4.42    4.50
   4 -12 -13  103.52    8.08
   4 -12 -13  113.59    7.49
   4  12 -13  118.23    8.35
   6  12 -15   78.40    7.33
   6 -12 -15   67.36    7.06
   6 -12 -15   75.65    6.27
   8 -12 -17   16.66    5.51
   8  12 -17   31.59    6.74
   8 -12 -17   27.35    6.71
  10  12 -19   66.64    8.06
  10 -12 -19   67.87    7.90
  12 -12 -21    1.59    7.48
  12  12 -21    7.99    6.94
  23  13 -14   17.34    6.51
  23  13 -14   27.58    5.78
  21  13 -12   36.93    5.87
  21 -13 -12   19.26    7.28
  19  13 -10   44.44    5.63
  19 -13 -10   33.87    6.92
  17  13  -8   36.59    5.18
  17 -13  -8   25.97    6.48
  15  13  -6    1.86    4.54
  15 -13  -6   -0.35    5.53
  13 -13  -4   -0.26    6.33
  13  13  -4    4.95    4.49
  13 -13  -4    7.94    5.47
  11 -13  -2   10.09    5.29
  11  13  -2    7.30    4.55
  11 -13  -2   14.55    6.22
   9 -13   0  337.39   13.67
   9 -13   0  341.79   10.70
   9  13   0  333.09   10.52
   7 -13   2  324.49   10.25
   7  13   2  336.89   10.43
   7 -13   2  336.45   14.19
   5 -13   4   11.11    4.73
   5 -13   4    6.73    6.35
   5  13   4   14.67    4.88
   3  13   6   41.94    5.77
  -3  13  -6   38.30    4.65
   3 -13   6   36.03    7.50
  -1 -13  -8  681.31   16.41
   1 -13   8  680.38   20.83
   1  13   8  659.01   16.37
  -1  13  -8  665.09   15.85
   1  13 -10  948.61   20.91
   1 -13 -10  942.01   20.09
   1 -13 -10  905.09   20.56
  -1 -13  10  913.45   25.89
   3 -13 -12  130.36    8.54
   3  13 -12  128.95    8.67
   3 -13 -12  137.71    7.70
  -3 -13  12  119.83   12.25
   5 -13 -14   80.44    7.36
   5  13 -14   74.38    7.12
   5 -13 -14   78.88    7.22
   7 -13 -16   -6.44    6.29
   7 -13 -16   -7.27    5.03
   7  13 -16  -10.24    5.86
   9  13 -18   45.72    7.43
   9 -13 -18   42.46    7.22
  11 -13 -20    9.62    7.35
  11  13 -20    9.08    7.02
  13 -13 -22   -9.00    7.97
  22  14 -13   42.45    6.25
  20 -14 -11   57.07    7.95
  20  14 -11   61.93    6.61
  18  14  -9   30.06    5.41
  18 -14  -9   31.66    6.98
  16 -14  -7   -9.49    7.91
  16  14  -7    8.32    4.84
  16 -14  -7    0.38    6.11
  14 -14  -5    8.89    6.03
  14  14  -5    6.54    4.74
  14 -14  -5    2.65    6.67
  12 -14  -3   13.13    5.54
  12 -14  -3    7.80    6.96
  12  14  -3    7.17    4.74
  10 -14  -1   34.32    7.02
  10 -14  -1   26.28    5.77
  10  14  -1   23.02    5.14
   8  14   1   23.25    5.05
   8 -14   1   19.85    6.80
   8 -14   1   20.81    5.34
   6 -14   3    3.07    4.80
   6  14   3   -1.72    4.53
   6 -14   3    1.98    6.53
   4 -14   5   -4.23    6.63
   4  14   5    5.18    4.71
  -2  14  -7    6.27    4.29
   2  14   7    6.53    5.07
  -2 -14  -7    7.58    5.27
   2 -14   7    0.76    7.17
   0 -14  -9   17.65    5.69
   0 -14   9    1.08    7.93
   0  14   9   12.20    5.43
   0  14  -9    7.14    4.70
  -2 -14  11   -5.67    8.61
   2 -14 -11    4.82    4.69
   2 -14 -11    5.39    5.61
   2  14 -11   11.64    5.33
   4 -14 -13  102.08    7.30
   4  14 -13  119.99    8.95
   4 -14 -13   93.09    8.46
   6 -14 -15   42.38    5.94
   6 -14 -15   44.39    7.08
   6  14 -15   59.31    7.22
   8 -14 -17   -7.37    6.50
   8  14 -17   -5.88    6.19
  10  14 -19    6.48    6.90
  10 -14 -19   16.94    7.44
  12 -14 -21   -7.71    7.88
  12  14 -21   -0.60    7.23
  19  15 -10  107.04    7.98
  19 -15 -10   82.92    8.63
  17  15  -8   20.20    5.13
  17 -15  -8   20.55    6.87
  15 -15  -6  147.59    9.62
  15  15  -6  139.11    8.11
  13 -15  -4    0.91    5.97
  13  15  -4    7.22    4.95
  13 -15  -4    0.79    7.37
  11 -15  -2    3.41    7.28
  11 -15  -2   -0.51    5.55
  11  15  -2    5.49    4.92
   9 -15   0   -0.29    5.25
   9  15   0    0.53    4.75
   9 -15   0    4.23    7.30
   7 -15   2  333.06   10.62
   7  15   2  336.42   11.03
   7 -15   2  358.86   15.39
   5 -15   4  551.19   18.35
   5  15   4  510.35   13.82
   3 -15   6  178.43   13.39
   3  15   6  158.66    8.46
   1 -15   8  291.54   15.43
  -1  15  -8  273.62    9.64
   1  15   8  267.64   10.11
  -1 -15  -8  264.89   10.32
   1 -15 -10  787.79   18.76
  -1  15  10  755.22   18.25
  -1 -15  10  788.40   24.82
   3  15 -12   19.79    6.03
   3 -15 -12   21.35    6.46
   5 -15 -14   23.78    6.84
   5 -15 -14   20.16    5.42
   5  15 -14   22.42    6.40
   7 -15 -16  100.54    9.38
   7  15 -16   94.44    8.45
   9 -15 -18   37.42    7.87
   9  15 -18   32.83    7.59
  11 -15 -20    5.12    7.95
  11  15 -20   -6.19    7.06
  18  16  -9   42.43    6.14
  18 -16  -9   34.29    7.93
  16 -16  -7   11.17    6.98
  16  16  -7   18.71    5.50
  14  16  -5   27.63    5.66
  14 -16  -5   20.88    6.90
  12 -16  -3   37.73    8.49
  12  16  -3   43.51    5.93
  12 -16  -3   42.97    6.99
  10 -16  -1   31.20    6.22
  10  16  -1   28.71    5.73
  10 -16  -1   28.63    8.13
   8  16   1    1.66    5.02
   8 -16   1   12.69    7.97
   8 -16   1    4.55    5.59
   6  16   3   36.86    5.66
   6 -16   3   39.21    8.75
   4  16   5  114.34    7.80
   4 -16   5  111.07   11.82
   2 -16   7   21.85    8.70
  -2 -16  -7   19.67    6.21
   2  16   7   31.41    5.61
   0  16   9   60.11    6.29
   0 -16  -9   65.93    7.16
   0 -16   9   69.76   10.15
   0  16  -9   53.50    5.93
  -2 -16  11  -26.62   10.79
   2  16 -11    2.86    5.23
   2 -16 -11   -6.30    6.09
  -2  16  11    6.60    5.58
   4  16 -13   18.69    6.28
   4 -16 -13   10.81    6.76
   6 -16 -15    7.96    6.98
   6  16 -15   14.16    6.46
   8  16 -17    4.41    6.94
   8 -16 -17  -16.37    7.02
  10  16 -19    3.78    7.55
  10 -16 -19   10.70    8.11
  17 -17  -8   37.58    8.19
  17  17  -8   62.34    6.62
  15 -17  -6  125.37    9.84
  15  17  -6  149.62    8.60
  13 -17  -4  263.06   11.55
  13  17  -4  284.22   10.68
  11  17  -2   27.78    5.80
  11 -17  -2   21.16    6.52
   9 -17   0   -8.30    5.90
   9 -17   0    1.72    8.22
   9  17   0    7.83    5.40
   7  17   2   -5.00    5.14
   7 -17   2   -8.85    7.98
   5  17   4    2.24    5.22
   5 -17   4    0.11    8.52
   3 -17   6   -4.34    8.93
   3  17   6   -2.49    5.15
  -1 -17  -8   77.58    7.45
   1 -17   8   77.88   11.27
   1  17   8   70.87    6.49
  -1  17  10  193.71    9.19
  -1 -17  10  204.77   16.87
   1  17 -10  191.31    9.07
   1 -17 -10  180.43    9.91
  -3  17  12  115.39    8.09
   3 -17 -12  108.81    9.03
   3  17 -12  119.51    8.72
   5 -17 -14  226.81   11.42
   5  17 -14  258.71   11.69
   7  17 -16  160.18   10.91
   7 -17 -16  148.40   10.77
   9  17 -18   28.54    8.19
   9 -17 -18   25.83    8.52
  16 -18  -7   13.22    7.89
  16  18  -7   31.58    6.05
  14 -18  -5   -0.56    6.99
  14  18  -5   15.64    5.74
  12  18  -3   15.84    5.75
  12 -18  -3   12.54    6.81
  10  18  -1   39.03    6.08
  10 -18  -1   32.18    6.93
   8 -18   1   95.37   10.58
   8  18   1   98.87    8.08
   6 -18   3   16.70    9.25
   6  18   3    6.41    5.61
   4  18   5   15.35    5.61
   4 -18   5    6.69    9.42
   2 -18   7   13.59   10.17
   2  18   7   26.15    5.89
   0 -18  -9   18.14    6.50
   0 -18   9    1.84   10.11
   0  18   9   15.15    5.63
  -2  18  11   -0.91    5.50
   2 -18 -11    3.03    6.71
   4  18 -13   -0.16    6.27
   4 -18 -13   -5.53    6.90
   6 -18 -15   52.98    8.57
   6  18 -15   57.27    7.80
   8  18 -17   55.22    8.51
  15 -19  -6   -1.28    7.73
  13 -19  -4   62.20    8.31
  13  19  -4   85.85    8.31
  11 -19  -2   11.87    6.87
  11  19  -2   24.94    6.24
   9  19   0  214.34   10.01
   7  19   2   41.55    6.38
   5  19   4    1.07    5.66
   5 -19   4  -15.96    9.08
   3  19   6   -4.77    5.57
   3 -19   6  -11.06    9.81
  -1 -19  -8   14.63    6.91
   1 -19   8   10.65   10.43
   1  19   8    6.92    5.69
  -1 -19  10  134.64   14.93
  -1  19  10  171.08    9.19
   1 -19 -10  154.08   10.27
   3 -19 -12    6.28    7.31
   5 -19 -14    3.08    7.76
   5  19 -14    2.44    6.32
   7  19 -16   21.91    7.48
  14 -20  -5   11.11    8.31
  12 -20  -3   -4.09    7.58
  12  20  -3    1.13    5.99
  10  20  -1   33.48    6.53
   8  20   1   35.01    6.56
   6  20   3   -1.13    5.79
   4  20   5   67.94    7.11
   4 -20   5   59.96   11.74
   2 -20   7   57.74   12.86
   2  20   7   79.85    7.27
   0 -20  -9   -8.42    6.94
   0 -20   9  -35.42   11.21
   0  20   9   -2.97    5.79
   2 -20 -11    6.51    7.71
   9  21   0   44.74    6.98
   7  21   2   27.73    6.55
   5  21   4   19.23    6.53
   3  21   6   25.95    6.67
   1  21   8   -0.15    5.99
   1 -21   8  -33.60   12.29
   6  22   3   16.47    6.63
   4  22   5   27.13    6.80
  26   0 -16   65.93    7.21
  24   0 -14   46.64    6.34
  22   0 -12   19.81    5.37
  20   0 -10  167.44    8.54
  18   0  -8  644.37   15.69
  16   0  -6  989.52   20.90
  14   0  -4 1558.55   28.44
  14   0  -4 1517.42   29.62
  12   0  -2  637.65   14.20
  12   0  -2  655.54   12.90
  10   0   0    4.82    2.16
  10   0   0    2.48    2.88
  -8   0  -2   46.27    3.78
  -6   0  -4  579.13   12.06
  -4   0  -6 1513.22   28.51
   4   0   6 1532.02   32.11
   2   0   8  137.21    7.37
  -2   0  -8  148.98    6.15
   0   0  10 2025.19   42.64
   0   0 -10 2071.65   38.55
   2   0 -12 1428.22   28.38
  -2   0  12 1443.68   31.63
   4   0 -14 1874.52   36.52
   6   0 -16 1034.39   22.66
   8   0 -18   70.16    6.37
  10   0 -20  125.66    8.62
  12   0 -22   -6.73    5.36
  14   0 -24    3.39    6.19
  16   0 -26   -6.45    6.66
  27  -1 -17   61.33    7.55
  27   1 -17   61.80    7.44
  25   1 -15    3.88    5.53
  25  -1 -15    5.88    5.65
  23  -1 -13  207.65    9.59
  23   1 -13  206.79    9.59
  21  -1 -11   88.89    7.42
  21   1 -11   84.60    7.44
  19   1  -9  112.86    7.72
  19  -1  -9  111.81    7.68
  17  -1  -7   68.79    5.72
  17   1  -7   71.05    5.68
  15   1  -5    3.50    3.82
  15  -1  -5    0.01    3.94
  15   1  -5    1.22    2.37
  13   1  -3  885.14   18.33
  13  -1  -3  894.50   18.35
  13   1  -3  855.79   17.17
  13  -1  -3  888.82   16.79
  11   1  -1  301.96    7.37
  11  -1  -1  310.17    8.56
  11  -1  -1  297.51    6.91
  -9   1  -1  299.18    7.02
   9  -1   1  302.78    8.01
  -7  -1  -3  214.62    6.26
   7  -1   3  219.19    6.20
  -7   1  -3  220.16    6.00
  -5   1  -5    3.42    2.50
   5  -1   5    6.38    3.59
  -5  -1  -5    4.67    2.49
  -3   1  -7  620.97   13.41
  -3  -1  -7  627.57   13.46
   3   1   7  632.85   15.03
   3  -1   7  619.23   15.70
  -1  -1  -9   10.26    3.24
   1   1   9    6.90    3.39
   1  -1   9    1.28    3.89
  -1   1  -9    5.04    3.07
   1  -1 -11   31.63    2.52
  -1  -1  11   30.47    5.00
  -1   1  11   34.72    4.71
   1   1 -11   28.86    4.01
   1  -1 -11   30.56    4.05
   3   1 -13  403.05   11.11
   3  -1 -13  400.35    8.83
   3  -1 -13  410.42   11.03
   5  -1 -15   51.64    5.24
   5   1 -15   50.97    5.22
   7   1 -17  235.71    9.93
   7  -1 -17  254.52   10.01
   9   1 -19   43.57    6.04
   9  -1 -19   51.47    6.11
  11  -1 -21   37.79    6.36
  11   1 -21   41.78    6.43
  13   1 -23   80.49    7.79
  13  -1 -23   79.19    7.63
  15  -1 -25  101.48    8.72
  15   1 -25  104.83   10.00
  17   1 -27  -13.87    6.93
  17  -1 -27  -16.67    6.76
  26  -2 -16   37.04    6.69
  26   2 -16   48.32    6.79
  24   2 -14   26.95    5.81
  24  -2 -14   29.58    6.05
  22   2 -12  125.06    8.10
  22  -2 -12  115.93    8.12
  20   2 -10   28.19    5.16
  20  -2 -10   24.42    5.14
  18  -2  -8  186.54    8.77
  18   2  -8  184.12    8.77
  16  -2  -6    4.47    4.20
  16   2  -6    3.79    2.63
  16   2  -6    4.09    4.20
  14   2  -4   12.93    3.80
  14  -2  -4   14.76    4.08
  14   2  -4   12.42    2.71
  12   2  -2    4.54    2.29
  12  -2  -2   -3.23    3.23
  12  -2  -2    1.44    1.59
  10   2   0  964.97   18.78
  10  -2   0  955.45   18.14
  10  -2   0  978.41   19.17
  -8  -2  -2  217.04    6.31
   8  -2   2  223.52    6.65
  -8   2  -2  226.84    5.66
  -6   2  -4  124.88    4.81
  -6  -2  -4  123.11    5.12
   6  -2   4  124.25    4.79
  -4   2  -6  401.68    9.44
   4  -2   6  417.30    8.43
   4   2   6  399.81   10.57
   4  -2   6  392.60   11.71
  -4  -2  -6  397.81    9.56
   2  -2   8  102.67    7.20
  -2  -2  -8  104.26    5.64
  -2   2  -8  103.11    5.54
   2   2   8   99.66    6.13
   0  -2  10  312.57   11.29
   0   2  10  318.59    9.64
   0  -2 -10  309.12    8.81
   0  -2 -10  304.88    7.29
   0   2 -10  310.43    8.87
   2   2 -12    3.86    3.64
   2  -2 -12    3.47    2.58
   2  -2 -12   -1.95    3.55
  -2  -2  12   -1.27    4.58
   4  -2 -14 1005.67   21.58
   4   2 -14 1004.09   21.71
   6  -2 -16  107.99    7.85
   6   2 -16  114.09    7.53
   8   2 -18  508.01   14.41
   8  -2 -18  493.31   14.08
  10  -2 -20  317.90   11.51
  10   2 -20  322.55   11.98
  12  -2 -22   -2.83    5.49
  12   2 -22   -0.39    5.68
  14   2 -24   45.90    7.34
  14  -2 -24   51.58    7.31
  16   2 -26   -5.83    6.69
  16  -2 -26  -12.43    6.68
  27   3 -17    4.46    6.01
  25  -3 -15   46.82    6.76
  25   3 -15   57.43    6.79
  23  -3 -13   11.32    5.49
  23   3 -13   11.40    5.37
  21  -3 -11    4.68    4.89
  21   3 -11    7.22    4.95
  19  -3  -9   60.71    5.78
  19   3  -9   61.23    5.76
  19   3  -9   71.14    5.22
  17  -3  -7    5.21    4.62
  17   3  -7   11.02    3.12
  17   3  -7    1.13    4.56
  15  -3  -5  156.09    7.55
  15   3  -5  140.84    5.97
  13   3  -3   39.21    3.17
  13  -3  -3   41.29    4.29
  11   3  -1  509.64   11.23
  11  -3  -1  516.86    9.97
  11  -3  -1  512.74   12.00
   9   3   1  415.58    9.90
  -9   3  -1  412.84    8.47
   9  -3   1  408.23    9.97
  -7   3  -3  338.30    7.72
  -7  -3  -3  342.66    8.42
   7  -3   3  343.63    8.29
  -5  -3  -5  212.08    6.58
  -5   3  -5  219.03    6.43
   5  -3   5  219.12    5.91
   5  -3   5  212.37    8.81
   3  -3   7  237.19    5.40
  -3  -3  -7  239.98    7.10
   3  -3   7  233.68    9.35
  -3   3  -7  239.12    7.41
   3   3   7  243.26    7.45
  -1  -3  -9    0.41    3.13
   1   3   9    0.93    2.88
  -1   3  -9    2.78    3.10
   1  -3   9    0.50    4.05
   1  -3 -11    9.57    2.75
   1   3 -11    7.95    3.67
  -1  -3  11   13.46    5.20
   1  -3 -11    6.00    3.41
   3  -3 -13   30.69    3.40
   3  -3 -13   30.77    4.48
   3   3 -13   23.65    4.40
  -3  -3  13   34.96    6.26
   5  -3 -15  129.63    7.72
   5  -3 -15  125.04    6.03
   5   3 -15  113.68    7.36
   7  -3 -17    8.82    4.87
   7   3 -17   12.74    5.04
   9   3 -19   68.23    6.61
   9  -3 -19   64.32    6.43
  11  -3 -21   -4.33    5.27
  11   3 -21   -3.39    5.44
  13  -3 -23   95.26    8.03
  13   3 -23   84.10    8.06
  15   3 -25   -3.83    6.47
  15  -3 -25   -1.78    6.37
  26  -4 -16   10.70    6.15
  26   4 -16   -2.51    5.72
  24   4 -14   18.71    5.91
  24  -4 -14   20.43    5.84
  22  -4 -12   12.33    5.50
  22   4 -12   21.77    5.42
  20   4 -10    6.03    4.66
  20  -4 -10    4.62    4.78
  18   4  -8   13.36    4.75
  18   4  -8    7.76    3.29
  18  -4  -8   11.07    4.84
  16   4  -6  688.58   15.22
  16  -4  -6  741.17   16.73
  14   4  -4    6.45    2.85
  14  -4  -4    8.81    4.10
  12   4  -2  158.82    6.00
  12  -4  -2  166.41    7.10
  10   4   0  104.37    5.20
  10  -4   0  102.09    5.75
   8  -4   2  199.66    6.40
  -8   4  -2  208.26    5.28
   6  -4   4  498.11   14.04
  -6  -4  -4  500.47   11.16
   6  -4   4  496.58   10.46
  -6   4  -4  503.75   10.63
  -4   4  -6   39.18    3.46
   4  -4   6   34.70    4.67
  -4  -4  -6   41.85    3.45
   4  -4   6   36.17    3.22
   2   4   8  643.50   14.37
   2  -4   8  617.80   16.71
  -2  -4  -8  637.60   13.83
  -2   4  -8  633.83   13.92
   0   4 -10   26.43    3.95
   0   4  10   26.31    3.38
   0  -4 -10   27.88    3.80
   0  -4  10   19.72    5.52
   0  -4 -10   27.20    3.20
   2   4 -12  180.52    7.72
   2  -4 -12  172.24    6.23
   2  -4 -12  179.91    7.46
  -2  -4  12  172.79    9.99
   4   4 -14   17.58    4.58
   4  -4 -14   27.69    3.88
   4  -4 -14   26.16    4.66
   6  -4 -16  392.84   12.07
   6   4 -16  393.25   12.36
   6  -4 -16  399.02   10.44
   8   4 -18   -2.55    4.80
   8  -4 -18    2.04    4.85
  10  -4 -20    7.26    5.33
  10   4 -20   14.47    5.68
  12  -4 -22   -0.10    5.65
  12   4 -22    4.80    6.00
  14   4 -24   97.50    8.66
  14  -4 -24  114.79    9.55
  16   4 -26  114.79   11.06
  16  -4 -26   97.39    9.12
  27   5 -17   14.12    6.46
  25  -5 -15   -2.09    5.89
  25   5 -15   -3.89    5.68
  23  -5 -13   98.44    8.22
  23   5 -13   99.62    8.11
  21   5 -11   12.37    5.16
  21  -5 -11   20.89    5.46
  19  -5  -9   81.29    7.29
  19   5  -9   82.94    7.28
  19   5  -9   90.90    5.89
  17   5  -7  104.70    6.01
  17  -5  -7  104.13    7.71
  15  -5  -5  140.80    7.60
  15   5  -5  130.94    6.34
  13  -5  -3  297.87    9.52
  13   5  -3  313.46    8.61
  11  -5  -1  280.11    8.52
  11   5  -1  270.33    7.82
   9   5   1  293.70    8.36
   9  -5   1  296.19    8.18
  -7  -5  -3  246.36    7.26
   7  -5   3  245.43   10.05
   7  -5   3  247.12    6.90
  -7   5  -3  237.02    6.16
   5  -5   5   20.38    2.42
  -5  -5  -5   20.09    3.10
   5  -5   5   14.61    4.38
  -5   5  -5   20.05    2.93
   3  -5   7    3.12    4.35
   3  -5   7   -0.07    1.57
  -3   5  -7   -2.26    2.99
   3   5   7    0.26    2.30
  -3  -5  -7    1.26    2.89
  -1  -5  -9   11.05    3.10
   1  -5   9    2.23    5.12
  -1  -5  -9   11.98    3.38
  -1   5  -9    8.82    3.45
   1   5   9    6.23    2.49
   1   5 -11   64.50    5.91
   1  -5 -11   65.02    5.14
   1  -5 -11   71.44    5.96
  -1  -5  11   69.64    6.66
   3   5 -13    5.73    4.24
   3  -5 -13    0.81    3.62
   3  -5 -13    5.42    4.08
  -3  -5  13    9.04    6.14
   5   5 -15   16.57    4.97
   5  -5 -15   13.54    4.25
   5  -5 -15   17.79    4.81
   7   5 -17  131.22    8.66
   7  -5 -17  154.12    8.48
   7  -5 -17  149.30    7.37
   9   5 -19   77.43    6.86
   9  -5 -19   68.33    6.37
  11   5 -21   14.37    6.04
  11  -5 -21    8.16    5.58
  13   5 -23   14.87    6.67
  13  -5 -23   10.67    6.02
  15  -5 -25   -4.01    6.40
  15   5 -25   -4.32    6.93
  26   6 -16   21.06    6.38
  26  -6 -16   19.13    6.80
  24   6 -14   57.20    6.75
  24  -6 -14   56.80    7.00
  22  -6 -12  382.21   12.73
  22   6 -12  404.79   12.55
  20   6 -10  236.56    8.46
  20   6 -10  245.79    9.75
  20  -6 -10  251.98    9.89
  18  -6  -8  162.86    8.42
  18   6  -8  166.47    6.97
  16  -6  -6   81.93    7.20
  16   6  -6   76.24    5.88
  14   6  -4   47.63    4.25
  14  -6  -4   60.02    5.21
  12  -6  -2  244.66    8.33
  12   6  -2  238.54    7.66
  10   6   0    1.27    2.86
  10  -6   0    1.80    3.27
   8   6   2   11.42    3.46
  -8   6  -2   11.29    2.02
   8  -6   2    8.88    4.87
   8  -6   2   11.57    3.08
  -6   6  -4   64.48    4.30
   6  -6   4   58.33    4.27
   6  -6   4   62.84    5.71
  -6  -6  -4   60.44    5.13
  -4   6  -6  454.60   10.55
   4  -6   6  430.93   13.52
   4  -6   6  436.53    9.06
  -4  -6  -6  450.60   10.66
  -2   6  -8  112.57    5.82
  -2  -6  -8  105.10    5.73
   2  -6   8   98.20    8.38
   0  -6  10  103.90    8.89
   0  -6 -10  101.00    5.75
   0   6 -10  112.58    6.61
   0  -6 -10  110.18    6.27
   2  -6 -12  139.93    7.12
   2   6 -12  145.75    7.44
  -2  -6  12  146.20   10.23
   2  -6 -12  130.56    6.42
   4  -6 -14   -1.56    4.20
   4  -6 -14   -0.38    4.21
   4   6 -14    2.35    4.49
   6  -6 -16  219.32    8.48
   6  -6 -16  209.92    9.06
   6   6 -16  201.47    9.68
   8  -6 -18    7.15    4.77
   8   6 -18   13.59    5.57
   8  -6 -18   11.14    5.05
  10   6 -20  112.64    8.91
  10  -6 -20   96.14    8.45
  12  -6 -22   20.74    6.18
  12   6 -22   18.67    6.57
  14  -6 -24   -1.56    6.27
  14   6 -24   -7.60    6.54
  25   7 -15    5.07    6.02
  25  -7 -15    1.14    6.28
  23  -7 -13   20.26    6.12
  23   7 -13   17.83    5.62
  21   7 -11   27.21    5.55
  21   7 -11   26.15    4.44
  21  -7 -11   26.61    5.85
  19   7  -9  115.46    6.39
  19  -7  -9  101.50    7.88
  17   7  -7   53.25    4.55
  17  -7  -7   51.90    5.81
  15   7  -5  329.34    9.90
  15  -7  -5  349.48   10.96
  13   7  -3  222.73    7.98
  13  -7  -3  237.77    8.79
  11  -7  -1  255.46    8.40
  11   7  -1  254.22    8.09
   9  -7   1  875.46   17.83
   9   7   1  886.97   18.32
  -7   7  -3   27.52    2.74
   7  -7   3   26.00    3.23
   7   7   3   34.99    4.14
   7  -7   3   33.52    5.27
  -5  -7  -5  189.43    6.93
   5  -7   5  195.67    9.39
  -5   7  -5  177.47    6.36
   5  -7   5  179.57    5.59
  -3  -7  -7    6.53    3.19
   3  -7   7    6.91    2.14
  -3   7  -7   11.00    3.39
   3  -7   7    5.37    4.99
  -1  -7  -9   92.43    5.83
   1  -7   9   94.30    8.63
  -1   7  -9   91.27    6.32
  -1  -7  -9   90.99    5.58
   1   7 -11   18.33    4.37
   1  -7 -11   20.46    4.21
  -1  -7  11   19.38    6.12
   1  -7 -11   19.44    4.13
   3   7 -13  122.82    7.74
   3  -7 -13  130.28    7.21
   3  -7 -13  119.98    6.87
  -3  -7  13  123.92   11.03
   5  -7 -15   72.01    5.92
   5   7 -15   68.42    6.30
   5  -7 -15   59.90    5.69
   7  -7 -17    9.36    4.87
   7   7 -17    3.47    5.22
   7  -7 -17    3.19    4.90
   9   7 -19  111.18    8.73
   9  -7 -19  104.17    7.90
  11   7 -21    8.11    6.12
  11  -7 -21   -1.41    5.46
  13  -7 -23   -7.63    5.79
  13   7 -23    4.63    6.54
  15   7 -25   -2.45    6.89
  26   8 -16   40.01    7.01
  24  -8 -14   -1.70    6.23
  24   8 -14    6.26    5.61
  22   8 -12   76.06    6.74
  22  -8 -12   78.09    7.34
  22   8 -12   96.51    7.02
  20   8 -10    4.23    3.83
  20  -8 -10    8.74    5.46
  18   8  -8   49.84    4.57
  18  -8  -8   41.80    5.83
  16   8  -6   45.04    4.68
  16  -8  -6   49.21    5.80
  14  -8  -4  116.77    7.76
  14   8  -4  111.75    6.84
  12  -8  -2  122.56    7.22
  12   8  -2  119.02    6.66
  10  -8   0   25.98    4.27
  10   8   0   35.56    4.09
   8   8   2  168.80    7.19
   8  -8   2  173.70    9.37
   8  -8   2  160.12    6.46
   6  -8   4  311.62   11.72
   6  -8   4  312.29    7.95
  -6   8  -4  305.34    7.98
   4  -8   6   19.73    2.83
  -4  -8  -6   23.39    3.77
   4  -8   6   23.22    5.57
  -4   8  -6   29.97    3.58
  -2  -8  -8   49.67    4.66
   2  -8   8   46.73    6.31
  -2   8  -8   52.61    4.38
  -2  -8  -8   49.39    4.31
   0  -8  10  116.42    9.63
   0  -8 -10  127.93    6.80
   0  -8 -10  125.08    6.78
   0   8 -10  126.34    6.91
  -2  -8  12   32.01    7.08
   2   8 -12   32.02    5.11
   2  -8 -12   29.60    4.84
   2  -8 -12   37.21    4.77
   4   8 -14  142.70    8.60
   4  -8 -14  159.97    8.02
   4  -8 -14  152.29    7.95
   6  -8 -16   86.82    7.09
   6  -8 -16   95.30    7.42
   6   8 -16   83.42    8.01
   8  -8 -18  153.38    8.40
   8  -8 -18  163.35    8.54
   8   8 -18  166.71    9.62
  10   8 -20  186.89   10.48
  10  -8 -20  191.71    9.46
  12   8 -22   -2.82    6.14
  12  -8 -22   -2.92    5.82
  14   8 -24   88.04    9.17
  25   9 -15   16.19    6.45
  23   9 -13  102.46    7.16
  23   9 -13   70.20    7.11
  23  -9 -13   80.38    7.81
  21  -9 -11    4.73    5.79
  21   9 -11   21.40    4.58
  19  -9  -9   12.08    5.63
  19   9  -9   14.40    4.25
  17   9  -7  206.31    8.12
  17  -9  -7  222.76    9.50
  15   9  -5   19.65    4.39
  15  -9  -5   29.36    5.54
  13  -9  -3   29.25    5.22
  13   9  -3   28.23    4.50
  11  -9  -1   19.42    4.44
  11   9  -1   11.07    3.96
   9   9   1  226.70    8.24
   9  -9   1  232.09    7.98
   9  -9   1  222.22   10.70
   7  -9   3    5.29    3.41
   7   9   3   11.31    4.08
   7  -9   3    0.30    5.38
   5  -9   5   47.64    6.17
   5  -9   5   42.13    3.66
  -5   9  -5   56.16    5.07
   3  -9   7  298.90   12.23
  -3   9  -7  286.87    8.72
  -3  -9  -7  276.60    8.89
  -1   9  -9   -2.07    3.82
  -1  -9  -9    1.37    3.75
   1  -9   9    0.31    5.76
  -1  -9  -9    4.01    4.17
   1   9 -11    6.84    4.42
  -1  -9  11    9.18    6.46
   1  -9 -11    3.75    4.17
   1  -9 -11    5.34    4.59
   3   9 -13   56.37    6.03
   3  -9 -13   51.16    5.80
  -3  -9  13   48.47    8.54
   3  -9 -13   50.47    5.57
   5  -9 -15   56.85    5.71
   5   9 -15   62.99    6.40
   5  -9 -15   57.47    6.05
   7  -9 -17  221.90    9.35
   7  -9 -17  222.28    9.37
   7   9 -17  207.30   10.23
   9  -9 -19    3.15    5.74
   9   9 -19    8.36    6.11
   9  -9 -19    1.11    5.28
  11  -9 -21    9.90    5.77
  11   9 -21   13.13    6.65
  13   9 -23    9.88    7.21
  24  10 -14    2.84    6.04
  24  10 -14   22.41    5.22
  24 -10 -14    9.69    6.90
  22  10 -12   33.99    6.27
  22 -10 -12   39.98    6.96
  22  10 -12   47.67    5.38
  20  10 -10   11.30    4.37
  20 -10 -10    1.15    5.78
  18  10  -8    7.70    4.15
  18 -10  -8    7.22    5.40
  16  10  -6   31.19    4.72
  16 -10  -6   21.77    5.39
  14 -10  -4   16.78    5.37
  14  10  -4   22.30    4.50
  12 -10  -2    8.20    4.95
  12  10  -2   10.60    4.39
  10  10   0   28.51    4.48
  10 -10   0   31.93    4.69
  10 -10   0   24.87    6.10
   8  10   2  102.42    6.90
   8 -10   2  102.06    6.10
   8 -10   2   95.52    9.00
   6  10   4   -1.79    4.17
   6 -10   4    0.89    5.75
   6 -10   4   -1.45    3.54
   4 -10   6  259.50   12.46
  -4  10  -6  258.15    8.10
  -2 -10  -8  581.61   13.76
   2 -10   8  581.43   17.88
  -2  10  -8  559.56   13.63
  -2 -10  -8  580.97   14.00
   0 -10 -10   40.56    5.46
   0  10 -10   41.90    5.12
   0 -10 -10   38.37    4.90
   0 -10  10   47.81    7.67
   2  10 -12   55.22    5.99
  -2 -10  12   40.18    8.82
   2 -10 -12   58.73    6.14
   2 -10 -12   58.15    5.52
   4 -10 -14   11.08    4.76
   4  10 -14    6.15    5.17
   4 -10 -14    7.31    5.36
   6 -10 -16  131.97    8.30
   6 -10 -16  123.92    7.83
   6  10 -16  121.04    8.87
   8 -10 -18   16.72    5.55
   8 -10 -18   25.92    6.12
   8  10 -18   26.01    6.46
  10 -10 -20    0.08    6.21
  10  10 -20    2.84    6.44
  10 -10 -20   -9.68    5.50
  12  10 -22   13.22    7.23
  23 -11 -13   -1.30    6.57
  23  11 -13   -1.16    5.83
  21 -11 -11   -1.21    6.14
  21  11 -11    8.57    4.72
  19 -11  -9    0.73    5.87
  19  11  -9   13.09    4.60
  17 -11  -7  197.72    9.35
  17  11  -7  182.41    8.04
  15  11  -5  117.05    7.16
  15 -11  -5  128.77    8.20
  13 -11  -3   17.30    5.28
  13  11  -3   19.30    4.71
  11 -11  -1   -3.67    6.42
  11  11  -1    2.79    4.39
  11 -11  -1   -0.57    4.79
   9 -11   1    1.94    6.22
   9  11   1    2.07    4.23
   9 -11   1    1.72    4.47
   7 -11   3   85.73    9.01
   7 -11   3   76.51    6.22
   7  11   3   85.03    7.07
   5  11   5  518.14   13.43
   5 -11   5  505.05   16.50
   5 -11   5  492.64   11.67
  -3  11  -7   26.45    4.35
   3 -11   7   29.46    6.81
   1 -11   9    9.94    6.77
  -1 -11  -9   17.78    4.59
  -1  11  -9   10.76    4.30
  -1 -11  -9    5.16    5.09
   1 -11 -11  108.42    7.19
   1  11 -11  107.83    7.95
  -1 -11  11  109.86   11.35
   1 -11 -11  102.55    7.52
   3  11 -13  240.71   10.02
   3 -11 -13  249.05    9.76
  -3 -11  13  254.71   15.69
   3 -11 -13  262.33    9.58
   5 -11 -15  277.78   10.36
   5  11 -15  273.94   11.06
   5 -11 -15  280.08   10.03
   7  11 -17   56.86    7.21
   7 -11 -17   49.47    6.68
   7 -11 -17   59.92    6.49
   9  11 -19   15.39    6.54
   9 -11 -19   18.41    6.69
   9 -11 -19    3.52    5.70
  11  11 -21   -6.96    6.57
  13  11 -23   92.36    9.67
  24  12 -14   23.45    6.71
  24  12 -14   33.67    5.82
  22  12 -12   94.09    7.66
  22 -12 -12   68.15    8.17
  20 -12 -10  120.71    9.38
  20  12 -10  123.41    7.60
  18  12  -8    9.48    4.56
  18 -12  -8    3.63    5.87
  16  12  -6   35.58    5.17
  16 -12  -6   29.45    6.02
  14 -12  -4  118.83    8.14
  14  12  -4  115.86    7.32
  14 -12  -4  137.01   11.81
  12 -12  -2  201.29    8.83
  12  12  -2  206.33    8.81
  12 -12  -2  206.98   11.63
  10 -12   0    6.00    6.10
  10  12   0   -5.38    4.30
  10 -12   0   -2.27    4.96
   8 -12   2  143.20   10.36
   8 -12   2  149.18    7.53
   8  12   2  133.34    7.97
   6 -12   4   13.54    4.47
   6  12   4    7.13    4.82
   6 -12   4    1.47    6.27
  -4  12  -6   18.73    4.22
   4  12   6   17.30    5.28
   4 -12   6   17.34    6.88
   2 -12   8   20.03    7.25
  -2  12  -8   22.62    4.73
  -2 -12  -8   22.73    5.53
   0  12 -10   -0.07    4.54
   0 -12 -10    1.39    4.39
   0 -12 -10   12.93    5.45
   0 -12  10    2.05    7.30
   2 -12 -12   14.00    5.55
   2  12 -12   18.57    5.48
   2 -12 -12   12.09    4.73
  -2 -12  12    3.70    8.21
   4 -12 -14    5.93    5.55
   4 -12 -14    2.73    4.73
   4  12 -14   -3.65    5.25
   6  12 -16    8.68    6.14
   6 -12 -16   -1.99    5.92
   6 -12 -16    1.53    5.23
   8  12 -18   22.94    6.73
   8 -12 -18    4.48    6.52
   8 -12 -18    5.78    5.78
  10 -12 -20   12.69    7.08
  10  12 -20    6.49    6.94
  12  12 -22   -2.73    7.21
  21 -13 -11    8.84    6.83
  21  13 -11   23.36    5.51
  19  13  -9  170.50    8.32
  19 -13  -9  145.15    9.77
  17  13  -7   93.86    7.11
  17 -13  -7   88.21    8.35
  15  13  -5   60.78    5.80
  15 -13  -5   66.58    6.69
  15 -13  -5   70.67    9.38
  13  13  -3   95.55    7.26
  13 -13  -3   95.80    7.71
  13 -13  -3   91.81    8.59
  11  13  -1   -0.13    4.38
  11 -13  -1   -1.61    5.07
  11 -13  -1   11.51    6.58
   9 -13   1   74.59    6.06
   9 -13   1   79.84    8.12
   9  13   1   83.79    7.20
   7 -13   3    4.49    7.20
   7  13   3    0.60    4.56
   7 -13   3    7.47    4.77
   5  13   5   74.57    6.18
   5 -13   5   69.23    8.12
   3  13   7   80.06    6.49
  -3  13  -7   80.19    6.84
   3 -13   7   78.90    9.26
  -1  13  -9   79.56    7.11
   1 -13   9   72.41    9.15
  -1 -13  -9   69.21    6.50
   1 -13 -11   92.09    7.64
  -1 -13  11   85.41    9.89
   1  13 -11   93.38    7.96
   1 -13 -11   90.50    7.21
  -3 -13  13   -3.95    9.49
   3  13 -13   21.76    5.95
   3 -13 -13    8.98    5.95
   3 -13 -13   10.31    4.94
   5 -13 -15   27.50    6.48
   5 -13 -15   25.94    5.66
   5  13 -15   31.35    6.61
   7 -13 -17   59.98    6.54
   7  13 -17   62.14    7.59
   7 -13 -17   63.67    7.50
   9  13 -19  109.47    9.95
   9 -13 -19  110.03    9.77
  11 -13 -21   -4.65    7.29
  11  13 -21   -1.23    7.07
  22  14 -12   34.35    6.05
  20  14 -10   22.81    5.35
  20 -14 -10    1.06    6.77
  18  14  -8   54.09    5.72
  18 -14  -8   33.81    6.81
  16  14  -6   88.55    7.48
  16 -14  -6   96.76   10.31
  16 -14  -6   88.89    8.50
  14 -14  -4  313.01   11.50
  14 -14  -4  349.88   15.34
  14  14  -4  337.13   11.06
  12  14  -2   63.28    5.93
  12 -14  -2   67.06    8.77
  12 -14  -2   49.83    6.42
  10 -14   0   64.57    8.51
  10 -14   0   56.68    6.06
  10  14   0   57.36    5.78
   8  14   2  127.21    7.83
   8 -14   2  136.33    7.67
   8 -14   2  122.58   10.76
   6  14   4  232.56    9.28
   6 -14   4  220.52   12.49
   4  14   6  102.20    7.65
   4 -14   6  101.15   10.07
   2 -14   8   -4.29    7.50
   2  14   8   -0.45    5.20
  -2 -14  -8   -0.97    5.46
  -2  14  -8   -3.60    4.32
   0  14 -10   35.13    5.70
   0 -14  10   27.82    8.78
   0 -14 -10   46.95    6.27
   2 -14 -12    8.35    4.84
   2  14 -12   14.67    5.67
   2 -14 -12   12.62    6.02
  -2 -14  12    0.55    9.19
   4 -14 -14   97.68    8.81
   4 -14 -14  109.41    7.93
   4  14 -14  104.91    8.83
   6 -14 -16    5.83    6.62
   6 -14 -16    7.92    5.51
   6  14 -16   21.23    6.78
   8 -14 -18   32.85    7.56
   8  14 -18   32.71    7.32
  10  14 -20   15.02    7.38
  10 -14 -20    8.03    7.67
  12 -14 -22    1.73    8.25
  21  15 -11   36.25    6.44
  19 -15  -9   44.76    7.72
  19  15  -9   59.19    6.41
  17  15  -7   31.16    5.53
  17 -15  -7   13.36    6.64
  15 -15  -5   91.78    8.75
  15  15  -5   94.02    7.63
  15 -15  -5   96.55   10.07
  13  15  -3   80.72    7.37
  13 -15  -3   65.49    9.21
  13 -15  -3   61.03    6.94
  11  15  -1   47.21    5.93
  11 -15  -1   45.70    6.24
  11 -15  -1   40.78    8.54
   9 -15   1    2.84    5.35
   9 -15   1   10.62    7.83
   9  15   1    9.61    5.08
   7 -15   3   85.17    9.06
   7  15   3   93.51    7.46
   5  15   5  133.13    7.96
   5 -15   5  135.21   11.75
   3 -15   7   60.72    9.86
   3  15   7   67.15    6.19
   1  15   9   24.64    5.81
  -1  15  -9   16.55    5.13
   1 -15   9   11.00    8.47
  -1 -15  -9   16.67    5.92
  -1  15  11   37.90    5.99
  -1 -15  11   29.18    9.86
   1 -15 -11   35.04    6.63
   1  15 -11   27.49    5.69
   3  15 -13   55.31    6.85
   3 -15 -13   55.50    6.13
   3 -15 -13   57.77    7.15
   5 -15 -15  110.35    8.24
   5  15 -15  118.19    9.78
   5 -15 -15  107.35    9.31
   7  15 -17   88.18    8.57
   7 -15 -17  100.63    8.81
   9  15 -19    9.84    7.35
   9 -15 -19   -0.93    7.75
  11 -15 -21    9.93    8.52
  20 -16 -10    8.46    7.75
  18  16  -8   53.34    6.37
  18 -16  -8   35.24    7.87
  16 -16  -6   68.74    7.94
  16  16  -6   65.14    6.48
  14  16  -4   23.12    5.58
  14 -16  -4    7.28    8.31
  14 -16  -4    8.97    6.54
  12 -16  -2  158.22    9.46
  12  16  -2  167.33    8.80
  12 -16  -2  180.14   13.02
  10  16   0  667.54   17.07
  10 -16   0  663.02   16.70
  10 -16   0  709.77   21.90
   8  16   2  498.30   13.98
   8 -16   2  518.03   18.96
   6  16   4  100.55    7.72
   6 -16   4  111.60   10.77
   4  16   6   24.23    5.53
   4 -16   6   26.90    8.75
   2 -16   8   43.02   10.25
   2  16   8   67.70    6.40
   0  16  10  237.84    9.84
   0 -16  10  200.12   14.67
   0 -16 -10  216.88   10.17
  -2  16  12   62.12    6.64
   2  16 -12   48.23    6.44
  -2 -16  12   48.15   11.69
   2 -16 -12   46.57    7.33
   4 -16 -14   41.54    7.25
   4  16 -14   45.16    6.95
   6  16 -16   -6.50    6.51
   6 -16 -16    0.07    7.25
   8 -16 -18  134.22   10.58
   8  16 -18  132.80   10.72
  10 -16 -20  146.81   11.62
  19 -17  -9   31.08    8.39
  17 -17  -7    9.48    7.66
  15 -17  -5   56.32    7.95
  15  17  -5   54.20    6.57
  13 -17  -3   39.43    7.05
  13  17  -3   47.89    6.25
  11  17  -1    3.45    5.60
  11 -17  -1   -0.24    6.13
  11 -17  -1    7.31    7.67
   9  17   1    6.54    5.44
   9 -17   1    0.61    7.71
   7 -17   3    9.48    8.81
   7  17   3   10.76    5.46
   5  17   5    2.96    5.33
   5 -17   5   10.03    9.28
   3  17   7    3.78    5.43
   3 -17   7  -14.77    9.24
   1 -17   9   -3.81    9.34
   1  17   9   -4.39    5.41
  -1 -17  -9   -5.18    6.07
  -1  17  11   50.35    6.48
  -1 -17  11   28.99   11.09
   1 -17 -11   47.08    7.22
   3  17 -13   53.60    7.24
  -3  17  13   58.06    6.76
   3 -17 -13   53.45    7.81
   5 -17 -15   83.40    8.73
   5  17 -15   86.59    8.37
   7  17 -17   46.06    8.16
   7 -17 -17   31.63    8.53
  16  18  -6  466.07   14.02
  16 -18  -6  441.01   15.44
  14  18  -4  337.55   12.24
  14 -18  -4  340.43   13.14
  12  18  -2  114.59    8.39
  12 -18  -2   92.33    8.16
  10  18   0  414.55   13.29
  10 -18   0  443.23   18.45
   8  18   2   29.97    6.04
   8 -18   2   13.32    9.34
   6  18   4   42.72    6.25
   6 -18   4   32.38   10.02
   4 -18   6   45.66   10.70
   4  18   6   49.69    6.45
   2  18   8   63.08    6.76
   2 -18   8   57.12   10.84
   0 -18 -10    3.89    6.60
   0  18  10   12.00    5.68
   0 -18  10  -11.39   10.35
  -2  18  12  198.19    9.92
   2 -18 -12  202.93   10.85
   4  18 -14  228.25   11.34
   4 -18 -14  194.93   11.30
   6  18 -16   16.35    7.38
   6 -18 -16   19.26    8.17
  15  19  -5   51.07    6.86
  15 -19  -5   36.94    8.41
  13  19  -3   23.15    6.30
  13 -19  -3   20.41    7.42
  11  19  -1   26.89    6.26
   9  19   1  121.59    8.96
   7  19   3   49.54    6.66
   7 -19   3   61.94   10.84
   5 -19   5    0.77    9.95
   5  19   5   -6.28    5.53
   3 -19   7   10.40   10.78
   3  19   7    4.50    5.78
   1 -19   9  -25.25   11.14
   1  19   9   -6.91    5.58
  -1  19  11   28.75    6.45
   1 -19 -11   37.26    7.60
  -1 -19  11   -9.65   12.76
   3 -19 -13    2.70    7.46
   5  19 -15   13.60    6.92
  14 -20  -4   28.47    8.44
  12  20  -2   53.41    7.23
  10  20   0   78.78    7.65
   8  20   2  176.71   10.23
   6  20   4   41.38    6.78
   4 -20   6  156.79   15.89
   4  20   6  148.19    9.40
   2  20   8   44.25    6.81
   2 -20   8   15.18   12.33
   0 -20  10   -1.76   12.69
   0  20  10   20.19    6.48
   0 -20 -10   29.30    7.93
   2 -20 -12   30.08    8.14
   9  21   1  111.77    9.21
   7  21   3    6.09    6.51
   5  21   5   14.57    6.65
   3 -21   7  -11.31   11.97
   3  21   7    9.50    6.56
   1  21   9   65.05    7.33
   1 -21   9   30.65   14.42
   6  22   4   42.47    7.41
   4  22   6   11.67    6.67
  26   0 -15   -5.41    5.43
  24   0 -13    5.72    5.30
  22   0 -11   -0.53    4.96
  20   0  -9    2.71    4.68
  18   0  -7    2.09    4.60
  16   0  -5    1.42    4.15
  14   0  -3    1.97    3.72
  14   0  -3   -0.30    2.15
  12   0  -1   -4.22    3.18
  12   0  -1   -1.45    1.99
  -8   0  -3    0.69    2.26
  -6   0  -5   -2.70    2.49
   4   0   7    2.07    3.60
  -4   0  -7   -0.65    2.72
  -2   0  -9   -1.40    2.99
   2   0   9    2.71    3.72
   0   0 -11   -0.62    3.49
   0   0  11   -2.68    4.06
   2   0 -13   -1.32    3.82
  -2   0  13   -0.29    4.91
   4   0 -15    3.35    4.35
   6   0 -17   -1.36    4.69
   8   0 -19    0.12    5.00
  10   0 -21   -3.97    5.33
  12   0 -23   -7.75    5.68
  14   0 -25   -7.30    6.29
  16   0 -27  -13.68    6.85
  27   1 -16   27.02    6.57
  27  -1 -16   16.68    6.38
  25  -1 -14    0.36    5.54
  25   1 -14    3.21    5.51
  23  -1 -12   -0.08    5.28
  23   1 -12    0.11    5.15
  21  -1 -10   -1.79    4.67
  21   1 -10    0.22    4.74
  19  -1  -8   26.24    5.12
  19   1  -8   30.80    5.25
  17   1  -6  372.37   11.34
  17  -1  -6  381.30   11.45
  15   1  -4    4.44    2.50
  15  -1  -4    7.05    4.08
  15   1  -4    7.58    4.05
  13  -1  -2   65.50    5.70
  13   1  -2   58.54    5.57
  13   1  -2   54.40    4.00
  13  -1  -2   56.44    3.72
  11   1   0  188.12    5.94
  11  -1   0  196.15    6.76
  11  -1   0  193.49    5.61
  -9  -1  -2   81.44    4.55
  -9   1  -2   82.92    4.14
   9  -1   2   82.18    4.94
  -7   1  -4   14.38    2.59
  -7  -1  -4   17.50    2.69
  -5   1  -6    0.58    2.60
   5  -1   6   -2.16    3.81
   5   1   6   -0.30    3.35
  -5  -1  -6    1.03    2.71
   3   1   8  205.50    7.84
  -3  -1  -8  206.42    6.98
  -3   1  -8  205.28    6.99
   3  -1   8  198.22    8.74
  -1  -1 -10  353.59    9.83
   1   1  10  358.07   10.80
   1  -1  10  347.68   11.72
  -1   1 -10  364.39    9.86
   1   1 -12  439.02   11.59
  -1   1  12  427.86   13.00
  -1  -1  12  419.94   13.47
   1  -1 -12  436.20   11.56
   3  -1 -14   17.08    4.59
   3   1 -14   14.88    4.47
   5  -1 -16   49.61    5.57
   5   1 -16   46.83    5.66
   7  -1 -18   49.60    6.03
   7   1 -18   54.05    6.09
   9   1 -20    1.20    5.30
   9  -1 -20    0.98    5.05
  11   1 -22   15.75    6.08
  11  -1 -22   18.65    6.17
  13  -1 -24   -7.52    5.83
  13   1 -24   -6.56    5.92
  15   1 -26   -7.90    6.78
  15  -1 -26   12.01    7.13
  26   2 -15   18.73    6.12
  26  -2 -15   16.03    6.37
  24  -2 -13   79.22    7.03
  24   2 -13   70.47    6.84
  22   2 -11   34.54    5.83
  22  -2 -11   30.28    5.67
  20  -2  -9   46.93    5.64
  20   2  -9   42.53    5.61
  18   2  -7   15.21    4.80
  18  -2  -7   20.60    4.98
  16   2  -5   67.77    4.91
  16   2  -5   70.25    6.54
  16  -2  -5   75.75    5.75
  14  -2  -3  974.46   20.32
  14   2  -3  984.81   19.25
  12   2  -1  449.49   10.31
  12  -2  -1  464.30    9.50
  12  -2  -1  478.75   11.44
  10   2   1   19.35    3.07
 -10   2  -1   14.31    2.09
  10  -2   1   15.86    3.32
   8  -2   3  290.66    7.77
  -8  -2  -3  294.74    7.62
  -8   2  -3  298.36    7.20
   6  -2   5   39.82    4.79
   6  -2   5   39.12    2.98
  -6   2  -5   44.96    4.17
  -6  -2  -5   40.15    3.30
  -4   2  -7  180.96    6.32
  -4  -2  -7  172.84    6.41
   4   2   7  184.35    7.36
   4  -2   7  177.92    8.69
   4  -2   7  178.23    4.92
   2  -2   9   54.36    5.13
  -2   2  -9   58.48    5.24
  -2  -2  -9   62.90    5.43
   2   2   9   60.77    5.81
   0   2  11   -0.21    3.61
   0   2 -11    1.78    3.52
   0  -2  11    4.13    4.93
   0  -2 -11    2.79    3.53
   2  -2 -13  259.79    6.84
   2  -2 -13  272.71    9.26
   2   2 -13  258.88    9.27
  -2  -2  13  245.92   11.66
   4   2 -15   24.39    4.97
   4  -2 -15   25.95    4.93
   6   2 -17   20.57    5.38
   6  -2 -17   21.16    5.33
   8  -2 -19   92.33    8.17
   8   2 -19   89.04    8.20
  10   2 -21   32.50    6.35
  10  -2 -21   19.58    6.15
  12   2 -23   26.05    6.59
  12  -2 -23   26.40    6.51
  14   2 -25    2.65    6.75
  14  -2 -25    7.56    6.83
  16  -2 -27  -16.67    6.99
  27  -3 -16   22.51    6.59
  27   3 -16   30.83    6.68
  25  -3 -14   95.23    8.44
  25   3 -14   94.05    7.71
  23   3 -12  289.72   10.88
  23  -3 -12  283.22   11.02
  21   3 -10    7.09    4.89
  21  -3 -10   -0.03    4.87
  19  -3  -8    8.14    4.86
  19   3  -8    9.29    4.64
  17  -3  -6   57.34    5.69
  17   3  -6   66.80    5.67
  17   3  -6   58.54    5.20
  15  -3  -4  358.23   10.64
  15   3  -4  352.03    9.12
  13  -3  -2  146.35    7.06
  13   3  -2  139.52    5.61
  11  -3   0  327.66    9.09
  11  -3   0  325.85    7.24
  11   3   0  328.57    8.48
   9  -3   2  833.44   16.58
  -9   3  -2  811.97   15.65
  -7   3  -4 1417.43   26.45
   7  -3   4 1420.78   31.42
   7  -3   4 1447.51   26.37
  -7  -3  -4 1410.66   26.85
   5  -3   6 2694.02   55.35
  -5   3  -6 2689.32   48.85
   5  -3   6 2718.54   47.74
  -5  -3  -6 2662.46   49.01
   3   3   8  449.41   11.64
   3  -3   8  457.23   13.47
  -3  -3  -8  462.61   10.98
  -3   3  -8  447.46   10.88
  -1  -3 -10  168.67    7.06
   1  -3  10  167.87    8.87
   1   3  10  159.08    7.12
  -1   3 -10  168.56    7.05
   1   3 -12  558.88   13.88
  -1  -3  12  548.84   16.55
   1  -3 -12  585.94   13.80
   1  -3 -12  563.30   11.95
  -3  -3  14  369.72   14.04
   3   3 -14  369.92   11.28
   3  -3 -14  361.43    9.01
   3  -3 -14  365.95   10.88
   5  -3 -16  232.01    9.65
   5   3 -16  233.97    9.51
   7  -3 -18   -2.74    4.77
   7   3 -18   10.48    4.97
   9  -3 -20  142.48    9.09
   9   3 -20  147.30    9.27
  11   3 -22   62.80    7.41
  11  -3 -22   71.74    7.13
  13   3 -24   43.59    7.44
  13  -3 -24   50.45    7.39
  15   3 -26   -3.38    7.06
  15  -3 -26  -18.99    6.35
  26  -4 -15   58.30    7.25
  26   4 -15   53.96    7.08
  24  -4 -13   21.83    5.98
  24   4 -13   22.64    5.94
  22  -4 -11   66.10    6.57
  22   4 -11   66.34    6.45
  20  -4  -9   52.60    5.90
  20   4  -9   56.65    5.77
  18  -4  -7  305.31   10.51
  18   4  -7  296.67   10.32
  18   4  -7  288.41    8.57
  16   4  -5   -2.40    2.97
  16  -4  -5   -4.19    4.30
  14  -4  -3   79.37    6.58
  14   4  -3   97.42    5.39
  12  -4  -1  455.32   11.27
  12   4  -1  457.09   10.74
  10   4   1    7.50    3.02
  10  -4   1    4.49    3.27
 -10   4  -1    9.44    1.80
  -8   4  -3   13.74    2.33
   8  -4   3    6.62    2.94
  -8  -4  -3   10.51    2.88
  -6  -4  -5  255.81    7.56
   6  -4   5  264.00   10.09
  -6   4  -5  259.71    7.08
   6  -4   5  261.52    6.68
  -4   4  -7  108.78    5.64
   4  -4   7  106.37    3.84
   4   4   7  104.20    5.76
  -4  -4  -7  104.86    5.65
   4  -4   7  104.04    7.81
  -2   4  -9    7.47    3.45
  -2  -4  -9    5.69    3.33
   2  -4   9    3.66    4.94
   2   4   9    7.66    2.94
   0  -4 -11  101.93    6.37
   0  -4 -11   94.77    5.09
   0   4  11   88.79    6.00
   0   4 -11   93.60    6.28
   0  -4  11   87.39    8.39
  -2  -4  13   36.39    7.00
   2  -4 -13   40.77    3.93
   2  -4 -13   40.47    4.82
   2   4 -13   42.20    5.01
   4   4 -15   72.70    6.17
   4  -4 -15   73.98    5.71
   4  -4 -15   87.20    7.38
   6   4 -17   23.08    5.51
   6  -4 -17   25.83    5.44
   8   4 -19    3.98    5.20
   8  -4 -19    0.35    5.05
  10  -4 -21   46.32    6.58
  10   4 -21   43.17    6.76
  12  -4 -23    4.84    6.15
  12   4 -23    5.85    6.29
  14   4 -25  109.71   10.52
  14  -4 -25  100.89    8.76
  27   5 -16   -1.39    6.11
  25   5 -14    1.65    5.77
  25  -5 -14    1.91    5.76
  23   5 -12  178.01    9.44
  23  -5 -12  180.29    9.38
  21  -5 -10  182.39    9.03
  21   5 -10  168.85    8.78
  19  -5  -8    8.28    4.99
  19   5  -8   11.33    4.79
  19   5  -8    9.01    3.40
  17  -5  -6  157.96    8.57
  17   5  -6  157.26    6.80
  15   5  -4   -1.59    3.24
  15  -5  -4    2.45    4.46
  13   5  -2  124.01    6.00
  13  -5  -2  113.75    6.76
  11  -5   0   36.43    4.12
  11   5   0   38.38    3.64
  -9   5  -2   19.78    2.15
   9   5   2   18.07    3.59
   9  -5   2   22.70    3.49
   7  -5   4  316.41   11.27
  -7  -5  -4  298.80    8.50
  -7   5  -4  315.65    7.64
   7  -5   4  316.97    7.88
  -5  -5  -6    8.58    3.14
   5  -5   6    4.53    2.21
  -5   5  -6    5.93    2.97
   5  -5   6   -4.27    4.29
   3  -5   8    9.56    4.85
  -3   5  -8   11.40    3.53
  -3  -5  -8   11.90    3.39
   3   5   8    7.74    2.64
  -1   5 -10  309.13    9.37
  -1  -5 -10  314.96    9.25
  -1  -5 -10  315.82    8.41
   1  -5  10  325.61   12.59
   1  -5 -12   12.94    4.13
   1  -5 -12   11.89    3.57
  -1  -5  12    7.69    5.63
   1   5 -12    8.67    4.15
   3  -5 -14  464.07   12.62
   3  -5 -14  455.08   11.19
   3   5 -14  475.39   13.04
  -3  -5  14  457.22   17.02
   5   5 -16   44.24    5.84
   5  -5 -16   44.40    5.69
   5  -5 -16   45.32    4.95
   7   5 -18  153.36    9.05
   7  -5 -18  157.72    8.90
   9  -5 -20  372.92   12.50
   9   5 -20  370.74   12.98
  11   5 -22   32.50    6.86
  11  -5 -22   24.37    6.28
  13  -5 -24    1.93    6.32
  13   5 -24   16.70    6.93
  15   5 -26    6.43    7.52
  15  -5 -26    3.26    7.15
  26   6 -15   -7.91    5.76
  26  -6 -15    3.63    6.58
  24  -6 -13   50.77    6.88
  24   6 -13   56.83    6.66
  22  -6 -11   24.55    5.85
  22   6 -11   42.38    6.04
  20  -6  -9  115.29    7.89
  20   6  -9  108.76    6.22
  20   6  -9  110.05    8.01
  18  -6  -7    6.34    4.92
  18   6  -7    6.91    3.37
  16  -6  -5   64.20    6.02
  16   6  -5   62.11    5.89
  14   6  -3   32.08    4.06
  14  -6  -3   35.11    4.93
  12  -6  -1  331.78    9.65
  12   6  -1  320.72    9.09
  10  -6   1  377.55    9.77
  10   6   1  388.77   10.08
   8   6   3  497.53   12.30
   8  -6   3  505.15   15.07
   8  -6   3  511.54   11.23
   6  -6   5 1519.52   27.87
  -6   6  -5 1534.22   28.57
   6  -6   5 1495.58   33.89
  -6  -6  -5 1546.58   29.14
   4  -6   7  909.97   22.97
   4   6   7  918.92   19.48
  -4   6  -7  950.79   18.90
  -4  -6  -7  914.55   18.93
   2  -6   9   14.42    5.25
  -2  -6  -9    5.42    3.59
  -2   6  -9   14.76    3.77
   0   6 -11    7.66    4.07
   0  -6 -11   15.71    3.86
   0  -6 -11   11.87    3.98
   0  -6  11    8.84    5.75
   2   6 -13  134.99    7.76
  -2  -6  13  128.47   11.52
   2  -6 -13  140.21    7.50
   2  -6 -13  138.65    6.79
   4  -6 -15  247.43    9.48
   4  -6 -15  224.67    8.46
   4   6 -15  254.84   10.04
   6   6 -17   49.18    6.09
   6  -6 -17   59.84    5.39
   6  -6 -17   55.56    5.85
   8  -6 -19   31.21    5.71
   8   6 -19   25.56    6.01
  10  -6 -21   -0.85    5.49
  10   6 -21    0.87    5.83
  12   6 -23   17.27    6.97
  12  -6 -23   18.85    6.46
  14   6 -25  104.36    9.70
  14  -6 -25   97.67    8.77
  25  -7 -14    8.08    6.41
  25   7 -14    5.06    5.93
  23   7 -12   -0.10    5.26
  23  -7 -12    3.92    5.80
  21   7 -10   11.40    3.96
  21   7 -10   10.85    5.25
  21  -7 -10    0.87    5.44
  19   7  -8  286.25    8.97
  19  -7  -8  303.11   10.72
  17   7  -6    9.71    3.78
  17  -7  -6   17.16    5.15
  15  -7  -4   47.64    5.69
  15   7  -4   45.85    4.69
  13   7  -2   77.61    6.05
  13  -7  -2   83.31    6.85
  11  -7   0  148.40    6.96
  11   7   0  139.47    6.71
   9  -7   2    9.14    3.47
   9  -7   2    7.82    5.23
   9   7   2    6.85    3.71
   7  -7   4  244.16   10.49
   7  -7   4  239.38    6.98
  -7   7  -4  239.86    6.72
  -5   7  -6   38.48    3.71
  -5  -7  -6   41.68    4.05
   5  -7   6   35.73    5.41
   5  -7   6   33.95    2.85
  -3   7  -8  206.88    7.53
   3  -7   8  201.86   10.41
  -3  -7  -8  208.92    7.56
   1  -7  10  235.20   11.34
  -1  -7 -10  242.54    7.95
  -1  -7 -10  234.07    8.08
  -1   7 -10  242.65    8.64
   1  -7 -12    9.22    4.26
   1   7 -12   12.49    4.40
  -1  -7  12   11.88    6.83
   1  -7 -12    7.78    4.15
   3  -7 -14   21.51    4.95
  -3  -7  14   32.40    7.75
   3  -7 -14   34.30    4.96
   3   7 -14   26.94    5.37
   5   7 -16  294.79   11.16
   5  -7 -16  313.96    9.86
   5  -7 -16  316.98   10.68
   7  -7 -18   18.06    5.33
   7   7 -18   23.03    6.01
   9  -7 -20   95.69    8.17
   9   7 -20  106.92    9.07
  11   7 -22   46.41    7.44
  11  -7 -22   52.71    6.99
  13  -7 -24   99.46    9.56
  13   7 -24  114.54   10.37
  26   8 -15   60.82    7.63
  24  -8 -13  145.79    9.92
  24   8 -13  147.97    9.32
  22   8 -11    0.23    5.25
  22   8 -11   16.58    4.35
  22  -8 -11   -0.87    5.60
  20   8  -9   72.22    6.16
  20  -8  -9   59.06    6.54
  18  -8  -7  103.28    7.79
  18   8  -7   98.94    6.29
  16  -8  -5   23.22    5.39
  16   8  -5   25.27    4.32
  14   8  -3   36.23    4.59
  14  -8  -3   35.44    5.40
  12  -8  -1  345.27   10.13
  12   8  -1  335.20    9.89
  10  -8   1  404.58   10.53
  10   8   1  414.90   11.03
  10  -8   1  405.67   14.13
   8   8   3  516.21   12.79
   8  -8   3  493.87   11.54
   8  -8   3  508.44   15.47
  -6  -8  -5 1792.91   33.84
   6  -8   5 1757.70   32.50
  -6   8  -5 1801.70   33.22
   6  -8   5 1775.33   39.38
  -4   8  -7  807.19   17.00
  -4  -8  -7  823.74   17.36
   4  -8   7  795.97   21.40
  -2  -8  -9  134.97    6.92
   2  -8   9  129.67    9.66
  -2   8  -9  130.79    6.95
   0  -8 -11  132.63    6.89
   0  -8  11  136.79   10.38
   0  -8 -11  143.64    7.16
   0   8 -11  142.20    7.54
   2  -8 -13    0.36    4.70
   2  -8 -13    6.34    4.60
  -2  -8  13    3.97    7.18
   2   8 -13   -2.85    4.62
   4   8 -15   -1.69    5.13
   4  -8 -15    1.95    5.02
   4  -8 -15   -3.89    4.63
   6   8 -17   24.02    5.93
   6  -8 -17   17.79    5.15
   6  -8 -17   36.24    5.50
   8  -8 -19    6.59    5.42
   8   8 -19   21.87    6.34
  10  -8 -21   65.07    7.07
  10   8 -21   66.80    7.88
  12   8 -23  159.79   11.14
  12  -8 -23  139.30    9.89
  25   9 -14   29.54    6.81
  25  -9 -14   30.81    7.39
  23   9 -12   27.83    6.23
  23   9 -12   31.18    4.87
  23  -9 -12   20.89    6.55
  21  -9 -10  254.35   10.83
  21   9 -10  249.17    9.11
  19  -9  -8   20.54    5.80
  19   9  -8   25.73    4.35
  17   9  -6   38.78    4.68
  17  -9  -6   41.81    5.84
  15  -9  -4   90.62    7.43
  15   9  -4   97.99    6.75
  13  -9  -2  571.16   14.19
  13   9  -2  557.82   13.93
  11  -9   0   65.76    7.81
  11  -9   0   54.45    5.11
  11   9   0   59.87    5.00
   9  -9   2  105.15    9.05
   9   9   2  108.95    6.95
   9  -9   2  106.98    6.18
   7   9   4   -2.10    4.16
   7  -9   4    2.67    5.17
   7  -9   4    3.42    3.36
  -5  -9  -6   -1.52    3.65
   5  -9   6    4.64    5.31
  -5   9  -6    2.82    3.34
  -3  -9  -8  224.89    8.22
  -3   9  -8  217.06    8.01
   3  -9   8  218.86   11.39
  -1   9 -10   44.26    4.88
   1  -9  10   35.12    6.96
  -1  -9 -10   42.49    5.07
  -1  -9 -10   40.49    4.93
   1  -9 -12   21.09    4.90
   1   9 -12   21.34    5.12
  -1  -9  12   27.58    7.24
   1  -9 -12   22.65    5.18
  -3  -9  14  177.10   13.13
   3  -9 -14  190.61    8.55
   3   9 -14  178.54    9.34
   3  -9 -14  168.11    8.39
   5  -9 -16    2.68    4.84
   5   9 -16    3.34    5.46
   5  -9 -16    4.23    5.13
   7  -9 -18   44.67    6.09
   7  -9 -18   34.06    5.88
   7   9 -18   43.88    6.79
   9   9 -20  196.57   10.84
   9  -9 -20  191.31    9.61
  11  -9 -22   16.86    6.40
  11   9 -22   16.65    7.01
  13   9 -24    8.05    7.44
  24  10 -13   32.19    5.33
  24 -10 -13   27.75    7.23
  24  10 -13   29.84    6.58
  22 -10 -11    9.48    6.39
  22  10 -11   20.42    4.79
  20 -10  -9  116.66    8.88
  20  10  -9  143.56    7.44
  18  10  -7  140.93    7.38
  18 -10  -7  141.78    8.80
  16 -10  -5   25.00    5.55
  16  10  -5   25.67    4.64
  14  10  -3  162.28    7.98
  14 -10  -3  175.94    8.55
  12  10  -1  525.29   13.48
  12 -10  -1  538.09   17.73
  12 -10  -1  519.77   13.36
  10  10   1   57.48    5.26
  10 -10   1   55.23    7.06
  10 -10   1   63.14    5.21
   8 -10   3  110.24    9.28
   8 -10   3   93.07    6.12
   8  10   3   98.39    7.19
   6 -10   5  228.22   11.51
   6  10   5  246.06    9.56
   6 -10   5  242.96    7.58
  -4 -10  -7   23.18    4.43
  -4  10  -7   24.97    4.06
   4 -10   7   19.80    6.37
  -2  10  -9  637.57   15.03
  -2 -10  -9  612.43   14.81
  -2 -10  -9  632.13   15.06
   2 -10   9  627.72   19.65
   0 -10 -11  438.92   12.27
   0 -10  11  418.98   16.30
   0 -10 -11  450.22   12.18
   0  10 -11  456.07   12.71
  -2 -10  13   64.27    8.91
   2 -10 -13   63.11    6.08
   2  10 -13   68.89    6.38
   2 -10 -13   58.61    5.68
   4 -10 -15   93.07    7.65
   4  10 -15   92.03    8.21
   4 -10 -15   89.11    7.45
   6 -10 -17  346.00   11.43
   6 -10 -17  330.46   11.27
   6  10 -17  352.99   12.68
   8 -10 -19   46.66    6.69
   8 -10 -19   36.78    6.38
   8  10 -19   40.03    7.21
  10  10 -21   -2.08    6.47
  10 -10 -21   -9.36    5.76
  12  10 -23  141.80   11.17
  23 -11 -12   76.04    8.23
  23  11 -12   69.59    7.27
  23  11 -12  110.05    7.74
  21 -11 -10   14.58    6.36
  21  11 -10   21.16    4.82
  19 -11  -8   54.00    6.91
  19  11  -8   57.79    5.43
  17 -11  -6   -3.04    5.44
  17  11  -6    3.07    4.36
  15  11  -4  109.28    7.19
  15 -11  -4  118.60    7.79
  13  11  -2  105.40    7.29
  13 -11  -2  102.44    7.69
  13 -11  -2   98.76   10.23
  11  11   0    5.59    4.50
  11 -11   0    0.55    4.85
  11 -11   0   14.83    6.25
   9  11   2   -1.92    4.29
   9 -11   2    0.48    4.47
   9 -11   2   -1.34    6.02
   7 -11   4   38.79    6.82
   7 -11   4   52.92    4.80
   7  11   4   46.64    5.43
   5 -11   6    0.26    6.21
   5  11   6    5.50    5.13
  -3  11  -8   36.74    4.77
   3 -11   8   41.21    7.52
  -3 -11  -8   48.21    5.13
  -1  11 -10   24.21    5.02
  -1 -11 -10   30.09    5.49
  -1 -11 -10   25.35    4.99
   1 -11  10   19.30    7.45
   1 -11 -12   15.15    5.30
   1  11 -12   16.98    5.14
   1 -11 -12    7.72    4.70
  -1 -11  12   10.27    7.86
   3  11 -14   26.10    5.84
   3 -11 -14   33.22    5.36
   3 -11 -14   31.60    5.94
  -3 -11  14   17.46    8.82
   5 -11 -16    1.02    5.50
   5  11 -16    4.52    5.70
   5 -11 -16   -0.36    5.16
   7  11 -18   63.61    7.65
   7 -11 -18   49.60    6.73
   7 -11 -18   73.63    7.22
   9  11 -20   73.67    8.22
   9 -11 -20   70.36    7.52
   9 -11 -20   67.83    7.17
  11  11 -22    1.64    7.25
  24  12 -13    8.91    6.59
  24  12 -13   28.80    5.55
  22  12 -11   64.00    6.27
  22 -12 -11   39.43    7.56
  20  12  -9   45.44    5.45
  20 -12  -9   29.58    6.87
  18 -12  -7   13.11    6.28
  18  12  -7   29.42    4.99
  16  12  -5  118.41    7.44
  16 -12  -5  118.10    8.34
  14 -12  -3   21.90    7.50
  14  12  -3   19.72    4.92
  14 -12  -3   25.13    5.54
  12 -12  -1   63.05    8.44
  12 -12  -1   61.95    5.85
  12  12  -1   59.65    5.63
  10 -12   1   90.10    8.40
  10 -12   1   92.66    7.13
  10  12   1   91.89    7.21
   8 -12   3   -6.82    5.97
   8  12   3   -0.49    4.53
   8 -12   3    1.11    4.57
   6 -12   5  140.99   11.02
   6  12   5  159.02    8.62
   4  12   7  138.08    8.64
   4 -12   7  133.47   11.00
  -2 -12  -9   83.88    6.85
  -2 -12  -9   80.84    7.51
  -2  12  -9   89.58    7.22
   2 -12   9   84.40    8.99
   0 -12 -11   28.28    5.72
   0  12 -11   25.11    5.32
   0 -12  11   21.80    8.16
   0 -12 -11   22.20    4.93
  -2 -12  13   69.39   10.18
   2 -12 -13   78.91    7.42
   2 -12 -13   81.24    7.01
   2  12 -13   86.26    8.08
   4 -12 -15    3.78    5.28
   4 -12 -15    0.22    5.97
   4  12 -15    3.01    5.88
   6  12 -17  101.16    9.10
   6 -12 -17   93.85    8.01
   6 -12 -17   90.65    7.74
   8 -12 -19  -16.25    5.57
   8 -12 -19   10.34    6.70
   8  12 -19   -1.24    6.43
  10  12 -21   -4.55    7.00
  23  13 -12   26.30    5.67
  21  13 -10   45.18    5.75
  21 -13 -10   25.53    7.17
  19  13  -8   56.08    5.78
  19 -13  -8   51.25    7.05
  17 -13  -6   -0.37    5.95
  17  13  -6    6.07    4.80
  15 -13  -4    3.43    5.56
  15  13  -4   12.47    4.95
  15 -13  -4   16.92    7.64
  13 -13  -2    3.55    6.87
  13 -13  -2    4.31    5.19
  13  13  -2    3.50    4.70
  11  13   0   43.66    5.31
  11 -13   0   50.15    8.35
  11 -13   0   53.40    5.84
   9 -13   2  102.61    7.43
   9 -13   2   99.97    9.31
   9  13   2   96.41    7.42
   7  13   4    0.02    4.69
   7 -13   4   -2.25    6.84
   5  13   6   34.61    5.67
   5 -13   6   38.36    7.85
   3  13   8    6.66    5.21
   3 -13   8    7.04    7.34
  -1  13 -10   67.30    5.87
  -1 -13 -10   54.27    5.59
  -1 -13 -10   69.59    6.53
   1 -13  10   63.94    9.38
  -1 -13  12  107.13   11.59
   1 -13 -12  113.24    8.20
   1 -13 -12  116.57    7.47
   1  13 -12  106.80    8.18
  -3 -13  14   -4.08    9.86
   3  13 -14   16.55    5.80
   3 -13 -14    8.71    5.92
   3 -13 -14    9.58    5.09
   5 -13 -16   39.45    6.86
   5  13 -16   34.36    6.80
   5 -13 -16   30.21    6.01
   7 -13 -18    1.14    6.58
   7  13 -18    1.56    6.42
   7 -13 -18   -3.27    5.81
   9  13 -20   -1.48    6.75
   9 -13 -20   -1.97    6.85
  22  14 -11   20.14    5.79
  20  14  -9   46.29    6.03
  20 -14  -9   26.25    7.35
  18 -14  -7   93.67    8.62
  18  14  -7   99.08    7.46
  18 -14  -7   90.58   10.69
  16  14  -5   93.55    7.51
  16 -14  -5   95.02    9.87
  16 -14  -5   82.21    7.57
  14  14  -3   11.96    5.15
  14 -14  -3   12.47    5.92
  14 -14  -3   15.10    8.29
  12 -14  -1   13.72    7.42
  12 -14  -1   21.94    5.84
  12  14  -1   18.26    5.21
  10 -14   1   82.71    7.55
  10 -14   1   88.24    8.94
  10  14   1   88.69    7.42
   8  14   3  343.55   11.17
   8 -14   3  349.52   15.65
   6  14   5  441.51   12.76
   6 -14   5  458.42   17.55
   4  14   7  259.40   10.07
   4 -14   7  256.92   14.00
   2  14   9   13.19    5.43
   2 -14   9   13.00    8.83
   0  14 -11  128.29    8.06
   0 -14 -11  122.03    8.33
   0 -14  11  125.77   11.96
   2  14 -13  187.90    9.79
   2 -14 -13  192.19    9.75
   2 -14 -13  189.33    8.80
  -2 -14  13  184.33   16.10
   4 -14 -15  261.42   10.21
   4 -14 -15  251.64   10.97
   4  14 -15  269.86   11.56
   6 -14 -17  141.58    9.76
   6 -14 -17  144.91    9.04
   6  14 -17  140.94   10.35
   8 -14 -19   -1.03    7.16
   8  14 -19  -10.05    6.59
  10 -14 -21    2.20    7.64
  10  14 -21   -3.23    7.30
  21  15 -10   85.67    7.97
  21 -15 -10   55.34    8.54
  19  15  -8  119.96    8.01
  19 -15  -8  114.48    9.75
  17 -15  -6   49.73    9.90
  17 -15  -6   51.32    7.45
  17  15  -6   49.80    6.02
  15 -15  -4   26.00    8.81
  15 -15  -4   37.79    6.72
  15  15  -4   34.27    5.81
  13  15  -2    8.97    5.34
  13 -15  -2    1.10    7.40
  13 -15  -2    4.20    6.00
  11 -15   0    8.70    7.43
  11 -15   0   -2.21    5.56
  11  15   0   -3.26    4.95
   9  15   2  238.95    9.79
   9 -15   2  238.71   14.25
   7  15   4  445.54   12.87
   7 -15   4  445.48   17.06
   5  15   6  370.51   11.75
   5 -15   6  385.78   17.05
   3  15   8   -5.64    5.19
   3 -15   8   -6.48    8.85
  -1 -15 -10   30.72    6.39
   1  15  10   50.43    6.44
   1 -15  10   27.53    9.28
   1 -15 -12    1.67    6.17
   1  15 -12   -2.66    5.22
  -1 -15  12  -14.81    9.33
   3  15 -14  220.96   10.39
   3 -15 -14  205.84   10.32
   3 -15 -14  205.48    9.59
   5 -15 -16  102.09    9.37
   5  15 -16  109.93    9.60
   5 -15 -16  104.25    8.20
   7 -15 -18   82.51    8.62
   7  15 -18   72.54    8.48
   9 -15 -20   26.16    8.23
   9  15 -20   42.93    8.47
  20 -16  -9    6.23    7.81
  18 -16  -7   46.38    7.96
  18  16  -7   58.97    6.49
  16 -16  -5   -4.07    6.39
  16  16  -5    8.15    5.50
  14 -16  -3   14.87    6.51
  14 -16  -3   24.30    8.86
  14  16  -3   19.90    5.64
  12 -16  -1    0.95    8.34
  12 -16  -1    2.74    6.15
  12  16  -1   15.52    5.61
  10  16   1    4.93    5.52
  10 -16   1   -2.74    8.44
   8 -16   3   61.47    9.17
   8  16   3   55.02    6.31
   6 -16   5   -8.40    7.78
   6  16   5   -2.54    5.10
   4 -16   7   -5.53    8.26
   4  16   7   -0.18    5.22
   2  16   9   20.01    5.88
   2 -16   9   22.84   10.36
   0 -16 -11   11.67    6.27
   0 -16  11    8.86   10.78
   0  16  11   12.17    5.76
   2  16 -13   22.14    6.35
  -2 -16  13  -10.37   10.96
   2 -16 -13   15.41    6.68
   4  16 -15   13.57    6.44
   4 -16 -15    8.93    5.69
   4 -16 -15   18.17    7.06
   6  16 -17   11.46    6.98
   6 -16 -17    4.55    7.60
   8  16 -19   44.53    8.58
   8 -16 -19   59.83    9.04
  19 -17  -8  102.02    9.50
  17 -17  -6   68.40    8.55
  17  17  -6  112.87    8.32
  15  17  -4  420.71   13.28
  13 -17  -2  242.39   14.98
  13  17  -2  249.72   10.35
  13 -17  -2  228.54   10.96
  11 -17   0    8.03    9.00
  11  17   0    4.67    5.62
   9  17   2   51.53    6.47
   9 -17   2   51.16    9.90
   7 -17   4  206.13   14.73
   7  17   4  192.62    9.59
   5 -17   6   77.72   11.23
   5  17   6   86.27    7.88
   3  17   8    7.32    5.57
   3 -17   8    6.07    9.28
   1 -17  10  266.54   15.93
   1  17  10  253.64   10.54
  -1 -17 -10  228.04   10.96
  -1 -17  12  423.18   20.24
  -1  17  12  401.47   12.83
   1 -17 -12  392.48   13.51
  -3  17  14  301.69   11.36
   3 -17 -14  301.52   12.46
   5 -17 -16  244.66   12.11
   5  17 -16  243.04   12.10
   7 -17 -18    8.15    8.22
   7  17 -18    7.47    7.52
  18 -18  -7   12.71    8.31
  16 -18  -5   -6.13    7.52
  16  18  -5   15.01    6.06
  14 -18  -3   31.21    7.56
  14  18  -3   22.34    6.27
  12  18  -1   19.24    5.99
  10 -18   1    2.10    9.24
  10  18   1   10.67    5.77
   8  18   3    0.01    5.64
   8 -18   3   -5.76    9.21
   6  18   5   -7.17    5.40
   6 -18   5  -12.55    9.39
   4  18   7   -8.74    5.53
   4 -18   7    1.44   10.19
   2  18   9    6.12    5.76
   2 -18   9   12.68   11.03
   0 -18 -11    4.72    6.85
   0  18  11    0.57    5.95
   0 -18  11  -39.73   11.38
  -2  18  13   57.94    6.92
   2 -18 -13   66.34    8.28
   4 -18 -15   69.47    8.83
   4  18 -15   81.90    8.45
   6  18 -17   16.20    7.44
  15 -19  -4   -0.35    7.84
  13  19  -2   11.59    6.15
  11  19   0   32.68    6.63
   9  19   2   11.24    6.08
   9 -19   2    8.42    9.90
   7  19   4    9.09    6.00
   7 -19   4   -4.81    9.98
   5  19   6   -7.92    5.74
   5 -19   6   -9.34   10.33
   3 -19   8    1.58   10.15
   3  19   8   -5.32    5.77
   1  19  10   56.82    6.87
   1 -19  10   44.44   13.26
   1 -19 -12   17.96    7.45
  -1  19  12    6.38    6.12
   3 -19 -14   28.83    8.16
  12  20  -1   40.22    7.03
  10  20   1   14.63    6.62
   8  20   3    3.81    6.22
   6 -20   5   -4.70   10.61
   6  20   5    8.54    6.36
   4 -20   7   -9.26   10.09
   4  20   7   19.99    6.49
   2  20   9    4.59    6.38
   2 -20   9  -15.99   11.02
   0  20  11   18.99    6.40
   0 -20  11  -41.61   13.89
   9  21   2   18.91    7.01
   7  21   4  109.53    9.51
   5  21   6   33.92    7.06
   3 -21   8   -6.61   11.41
   3  21   8   -2.17    6.40
   1 -21  10  -35.45   12.30
   1  21  10    1.15    6.28
  26   0 -14    0.51    5.70
  24   0 -12    7.94    5.41
  22   0 -10  334.13   11.37
  20   0  -8  810.31   18.75
  18   0  -6  260.92    9.72
  16   0  -4 1077.19   22.42
  14   0  -2 1745.86   33.50
  14   0  -2 1775.28   32.38
  12   0   0   13.73    2.51
  12   0   0   11.69    3.56
 -10   0  -2  108.79    4.83
  -8   0  -4   25.99    2.94
   6   0   6  411.28   12.16
  -6   0  -6  407.48    9.75
   4   0   8   69.36    6.57
  -4   0  -8   61.74    5.19
  -2   0 -10 1212.51   24.34
   2   0  10 1223.25   27.36
   0   0  12  864.09   21.33
   0   0 -12  896.57   19.17
  -2   0  14 1189.58   27.87
   2   0 -14 1177.01   24.80
   4   0 -16  659.71   16.52
   6   0 -18   19.19    5.40
   8   0 -20   -2.50    5.18
  10   0 -22   67.00    7.23
  12   0 -24   85.61    8.21
  14   0 -26   35.65    7.95
  27  -1 -15   37.31    6.79
  27   1 -15   26.08    6.58
  25   1 -13   23.94    5.93
  25  -1 -13   26.29    6.04
  23  -1 -11   56.70    6.42
  23   1 -11   56.88    6.48
  21  -1  -9   11.87    5.11
  21   1  -9    8.87    5.09
  19  -1  -7   12.79    4.96
  19   1  -7   12.01    4.79
  17  -1  -5   64.77    5.69
  17   1  -5   56.80    5.56
  15   1  -3   37.90    4.70
  15  -1  -3   40.86    4.86
  15   1  -3   39.62    3.27
  13  -1  -1   87.52    4.24
  13   1  -1   95.50    6.36
  13  -1  -1   91.56    6.05
  13   1  -1   89.50    4.77
  11  -1   1  120.50    6.09
  11   1   1  123.76    5.56
  -9  -1  -3  126.13    5.27
   9  -1   3  123.01    5.55
  -9   1  -3  123.66    4.96
  -7   1  -5  488.84   10.81
  -7  -1  -5  480.27   10.89
   5   1   7   44.57    4.40
   5  -1   7   39.19    4.61
  -5  -1  -7   42.89    3.73
  -5   1  -7   43.76    3.70
   3  -1   9   14.45    4.55
  -3  -1  -9   15.53    3.51
   3   1   9   19.28    4.26
  -3   1  -9   13.37    3.57
  -1   1 -11  760.29   17.06
  -1  -1 -11  774.81   17.05
   1  -1  11  764.73   19.47
   1   1  11  799.33   19.04
  -1  -1  13   90.01    8.67
   1   1 -13   89.62    6.49
   1  -1 -13   88.58    7.01
  -1   1  13   91.94    8.37
   3   1 -15   29.28    5.06
   3  -1 -15   30.73    5.19
   5   1 -17  119.17    8.27
   5  -1 -17  124.98    8.44
   7  -1 -19   -0.55    5.03
   7   1 -19   -0.75    4.99
   9  -1 -21  173.05    9.74
   9   1 -21  156.82    9.61
  11  -1 -23   -2.63    5.82
  11   1 -23  -11.67    5.71
  13   1 -25   27.59    7.35
  13  -1 -25   30.44    7.31
  15   1 -27   55.58    8.67
  15  -1 -27   51.21    8.58
  26   2 -14   14.56    5.99
  26  -2 -14   10.45    6.01
  24  -2 -12    9.60    5.50
  24   2 -12    9.84    5.67
  22  -2 -10  130.27    8.40
  22   2 -10  120.16    8.21
  20  -2  -8   15.31    4.93
  20   2  -8   17.21    5.02
  18   2  -6   35.45    5.26
  18  -2  -6   31.91    5.35
  16  -2  -4  210.54    8.63
  16   2  -4  196.02    6.76
  16   2  -4  195.80    8.51
  14   2  -2   43.77    3.45
  14  -2  -2   44.71    4.70
  12   2   0   10.79    2.76
  12  -2   0    6.66    3.73
  12  -2   0   10.05    2.19
 -10   2  -2  528.26   10.94
  10  -2   2  529.46   11.96
  -8   2  -4  326.00    7.94
   8  -2   4  323.17    8.20
  -8  -2  -4  320.87    8.29
   6  -2   6   29.86    2.87
  -6   2  -6   32.16    3.27
  -6  -2  -6   26.48    3.37
   6  -2   6   28.10    4.92
  -4   2  -8  405.70   10.32
   4   2   8  402.00   11.21
  -4  -2  -8  414.04   10.31
   4  -2   8  401.78   12.36
   4  -2   8  419.00    8.56
   2  -2  10    8.05    4.75
   2   2  10    9.99    3.68
  -2  -2 -10   11.94    3.68
  -2   2 -10   11.98    3.62
   0  -2 -12   73.66    6.52
   0   2  12   75.69    6.91
   0   2 -12   82.03    6.45
   0  -2  12   82.25    8.65
   2  -2 -14  130.41    7.81
   2   2 -14  135.60    7.77
  -2  -2  14  129.06   10.45
   4   2 -16   69.76    6.16
   4  -2 -16   82.73    7.72
   6  -2 -18    6.01    5.08
   6   2 -18   -0.85    4.95
   8  -2 -20  216.65   10.30
   8   2 -20  209.87   10.27
  10  -2 -22  271.31   11.67
  10   2 -22  276.81   11.88
  12  -2 -24   48.06    7.37
  12   2 -24   50.82    7.56
  14   2 -26   11.58    7.22
  14  -2 -26   16.04    7.30
  27  -3 -15    1.41    6.25
  27   3 -15    5.53    6.20
  25  -3 -13    1.36    5.66
  25   3 -13    1.81    5.74
  23  -3 -11   21.48    5.69
  23   3 -11   21.05    5.76
  21   3  -9  154.91    8.50
  21  -3  -9  158.95    8.54
  19   3  -7   68.98    6.01
  19  -3  -7   69.41    6.05
  17   3  -5   21.26    3.48
  17   3  -5   12.19    4.76
  17  -3  -5   27.24    5.12
  15  -3  -3   89.18    6.97
  15   3  -3   75.04    5.26
  13  -3  -1  205.64    7.98
  13   3  -1  198.04    6.72
  11   3   1   81.93    5.47
 -11   3  -1   88.09    3.91
  11  -3   1   79.83    5.78
  -9   3  -3   -0.47    2.22
   9  -3   3    1.11    3.05
  -9  -3  -3   -0.62    2.69
   7  -3   5  925.29   17.72
  -7   3  -5  910.06   17.99
  -7  -3  -5  914.21   18.41
   7  -3   5  914.80   22.07
   5   3   7  389.35   10.86
   5  -3   7  383.09   12.35
  -5   3  -7  410.31    9.89
  -5  -3  -7  380.64    9.87
   5  -3   7  405.38    8.57
  -3  -3  -9    3.82    3.39
   3  -3   9   10.54    4.59
   3   3   9    1.52    3.21
  -3   3  -9   10.07    3.49
  -1   3 -11   11.14    3.88
   1  -3  11    2.70    4.72
  -1  -3 -11    4.27    3.71
   1   3  11    5.62    3.74
   1   3 -13   52.99    5.22
   1  -3 -13   49.96    4.59
   1  -3 -13   56.90    5.24
  -1  -3  13   54.26    6.55
  -3  -3  15  130.66   11.87
   3  -3 -15  108.36    7.90
   3   3 -15  114.80    7.58
   5   3 -17   -0.75    4.97
   5  -3 -17    0.99    4.94
   7   3 -19    8.26    5.32
   7  -3 -19   -3.27    5.14
   9  -3 -21    5.98    5.62
   9   3 -21    5.86    5.91
  11  -3 -23   71.53    7.70
  11   3 -23   66.27    7.79
  13   3 -25    2.80    6.85
  13  -3 -25    6.46    6.74
  15  -3 -27   -1.84    7.34
  26  -4 -14    9.16    6.09
  26   4 -14   -1.41    5.86
  24   4 -12    8.62    5.56
  24  -4 -12    4.86    5.51
  22   4 -10    4.03    5.21
  22  -4 -10    5.75    5.20
  20  -4  -8  210.88    9.31
  20   4  -8  202.97    9.20
  18   4  -6    3.15    4.65
  18  -4  -6    2.76    4.88
  18   4  -6    0.55    3.16
  16  -4  -4   92.02    7.35
  16   4  -4   93.06    5.83
  14   4  -2    8.24    3.25
  14  -4  -2    9.71    4.22
  12  -4   0  393.35   10.47
  12   4   0  397.95   10.03
 -10   4  -2  123.76    4.41
  10  -4   2  128.10    5.97
  10   4   2  124.78    6.41
  -8   4  -4  110.13    4.87
   8  -4   4  108.55    5.40
  -8  -4  -4  110.72    5.75
[truncated: 207,295 more chars]
