# Supplementary material
Source: MDPI journal article supplement (https://www.mdpi.com/2304-6740/6/4/107)
Supplement: s1 [file s1 › inorganics-359404.xyz]

180
Compound 4opt (na92A), E = -6530.06824833 Free E =-6528.62972945 (298.15K), -6528.67037832 (348.15K)
Si	-1.970628261720	7.275155066444	14.245758254214
Si	-2.914194906184	5.505817119986	12.934664786179
Si	-0.928870164568	5.195015837922	14.301286040059
Si	-1.074054282085	4.494358881304	12.084935561041
Si	0.293981282132	3.277298199543	15.055630642724
Si	-0.618942866357	2.375285098013	13.111696060566
Si	-1.002982729483	1.439213392014	15.320260384296
Si	-0.363205651586	0.087102454533	13.447697154819
C	-3.034261329237	7.979211902218	15.710230149465
C	-1.021913828603	8.916862974759	13.823030829800
C	-4.696367358886	4.815302729071	12.509545480600
C	-0.128451465169	4.780519834409	10.414650123323
C	2.052958536553	3.698866503528	15.756648043133
C	-2.248319891708	1.323920184789	16.827032750876
C	1.250023571818	-0.876922945451	12.954289006952
C	-1.638511222639	-1.235187987098	12.818054282153
C	-2.176716240799	9.232457830101	16.071703031845
H	-2.726617351479	9.935701796703	16.708196421505
H	-1.301097235716	8.933099773208	16.652995614282
C	-1.712482364935	9.937560743461	14.791514256001
H	-1.044358495320	10.772632287980	15.043704151721
H	-2.585243669996	10.402287325679	14.316526662336
Si	-4.785413358685	8.624389884301	15.234577062492
C	-6.199549813468	7.414096532871	15.571907873336
H	-7.119772221642	7.853016516516	15.166377280736
H	-6.357584735888	7.252767429159	16.642997021833
H	-6.067255395382	6.438465721239	15.100667595443
C	-5.209163105918	10.174451066558	16.241729904493
H	-4.598213874666	11.036107311877	15.949546538578
H	-5.105294740247	10.033870526520	17.322059599030
H	-6.255896289435	10.434479664868	16.039064596234
C	-4.948783456713	9.168910786389	13.433567646011
H	-6.007780635190	9.325733310813	13.193580101393
H	-4.555168919740	8.432922125384	12.731776588463
H	-4.426688663096	10.114836497737	13.254481999708
Si	-3.135278789522	6.858619862527	17.251793962211
C	-3.994252386652	5.213433455190	16.938595221454
H	-3.561642439527	4.724600610861	16.059412890237
H	-5.071935940939	5.301194490918	16.787230207833
H	-3.834994789615	4.552575067494	17.797592086508
C	-4.020256214878	7.759493804193	18.665373029306
H	-5.082679583204	7.936497032185	18.469723076755
H	-3.550141290614	8.727475623279	18.875274095597
H	-3.948590385642	7.153988081715	19.577470502917
C	-1.421785293867	6.432578042249	17.927061280178
H	-1.542125883653	5.736540252670	18.766722961073
H	-0.878167607383	7.307023125815	18.299155384958
H	-0.801577154124	5.935166350987	17.174857199486
Si	0.830609421412	8.869249881357	14.359752558839
C	1.881707195377	7.541295820733	13.524066216192
H	2.316612559947	7.880288459809	12.580106504159
H	1.302525426901	6.633629994911	13.328281799702
H	2.707437713680	7.270294308823	14.192219963154
C	1.652167874533	10.554938240014	14.053794391626
H	1.704582791086	10.851389843784	13.002976118500
H	2.680684522844	10.498651137734	14.432961638269
H	1.150115346424	11.358949514232	14.604321243819
C	1.083549478800	8.626807959740	16.221362083850
H	0.610492461326	7.725674509551	16.616434969820
H	0.734563586673	9.486396339123	16.804012270520
H	2.163447216532	8.533691073449	16.394928041022
Si	-1.106531911313	9.546546382402	12.006974734503
C	-1.238362812462	11.436742326993	12.028156218084
H	-1.165396815893	11.813437098776	11.000359642422
H	-0.443459950842	11.907021619002	12.615583129027
H	-2.199240670403	11.774223900435	12.433116886787
C	0.423408175490	9.122670008346	10.972408235541
H	0.647542219028	8.054162133551	10.967081219847
H	1.326323882482	9.651548113447	11.289071605584
H	0.216955210162	9.417125132190	9.935954373004
C	-2.570160499117	8.941838870887	10.964045964982
H	-3.469545399506	9.536823385465	11.141746436918
H	-2.817843064118	7.888627181981	11.130272709969
H	-2.304059464872	9.055575836616	9.905827677206
C	-5.649631673864	5.945593682843	12.103368339237
H	-5.240322999128	6.557176053507	11.289627876708
H	-5.886160092641	6.610420704112	12.936251206654
H	-6.598679689735	5.517424199601	11.746983496106
C	-4.497981549374	3.891085159669	11.295792632906
H	-5.463556336950	3.443616709158	11.013282574185
H	-3.799602049924	3.075644508848	11.506571445499
H	-4.114894623346	4.437726400909	10.425763798071
C	-5.289331723440	4.007111610766	13.666526870079
H	-6.254628645335	3.570340383091	13.368686758125
H	-5.464097314852	4.619582755786	14.554023634232
H	-4.632529590485	3.184096464972	13.957986850694
C	-0.845721136111	5.879058110618	9.623162304962
H	-0.907324241907	6.816519049773	10.179851479138
H	-1.869923158890	5.584213882742	9.365036522204
H	-0.307125672985	6.082907558807	8.685518376314
C	-0.173671171897	3.471934433697	9.615797216011
H	-1.200382226688	3.144093818844	9.414834958892
H	0.343573909087	2.660954620083	10.138767586304
H	0.326492677631	3.608981657245	8.645302757510
C	1.334054558828	5.159625294317	10.671843337015
H	1.424257472388	6.120782203296	11.182030319586
H	1.878178371600	5.237176368328	9.718157558816
H	1.848066392221	4.411302263070	11.285190990064
C	3.042065090253	3.965138488483	14.616824220517
H	4.014694334444	4.280195630946	15.024676154955
H	2.690411710866	4.760194771288	13.949778411961
H	3.211887959780	3.075930529151	14.006532089821
C	1.930977566088	4.961933220303	16.618141778119
H	1.220574021811	4.834581158970	17.443429311563
H	1.609400017982	5.824815431722	16.025790555367
H	2.908628199654	5.210653438388	17.057630944812
C	2.527234677865	2.534469462211	16.632336322810
H	3.542593841890	2.731691341072	17.007763238822
H	2.554146690669	1.589749994527	16.085105927372
H	1.870613407110	2.391288852093	17.498917038691
C	-1.796936397405	2.415076771756	17.813257056021
H	-1.811999105000	3.411959532212	17.362500541506
H	-0.780063617111	2.234801683167	18.182085819669
H	-2.472862001286	2.427367061533	18.682368562095
C	-2.145780522947	-0.034010375890	17.531524676185
H	-2.757534468751	-0.022101071241	18.446205646044
H	-1.115801667937	-0.266330800890	17.829604452515
H	-2.508499697125	-0.854230221607	16.909217523134
C	-3.693444294137	1.595824309041	16.401305579391
H	-4.354248515250	1.594918045376	17.281432174491
H	-4.070049772551	0.842740714593	15.705371138129
H	-3.792618476602	2.570496754216	15.917757749958
C	0.660015403047	-2.236428278778	12.443786634740
H	1.326128319738	-2.719694628249	11.715529729603
H	0.562888051722	-2.957031365273	13.265114811090
C	-0.725690887614	-2.019676536740	11.824086685077
H	-1.163290870362	-2.983491963425	11.538429291750
H	-0.616686343440	-1.458544644387	10.892862576060
Si	2.149562843793	-0.103826211411	11.432095833241
C	1.102899601633	-0.076324874014	9.853201264381
H	0.151949027920	0.448387222868	9.963653944432
H	0.902083804902	-1.082624249423	9.469506218442
H	1.682934869511	0.453703711110	9.086639123227
C	3.628947133842	-1.180642592357	10.920508065574
H	4.063037729493	-0.741633177757	10.012960246278
H	3.321934263454	-2.202197400656	10.668175027407
H	4.424549321189	-1.245466911195	11.667299774281
C	2.764089741883	1.665870945855	11.667217751808
H	2.819205282776	2.154093611773	10.687224244181
H	3.759455065410	1.711203809200	12.116721809609
H	2.079703514558	2.249771012144	12.290402174902
Si	2.556894533495	-1.186914596908	14.332002345148
C	1.928259918117	-1.141844644695	16.120269279309
H	1.485239879730	-2.095187643039	16.419262944747
H	1.194191059254	-0.350900330528	16.303822874960
H	2.785698409090	-0.956163941715	16.778951758950
C	4.013185417269	0.025290506025	14.305806589626
H	3.698637295694	1.069350250890	14.360243635326
H	4.657941782670	-0.084182461881	13.429777466883
H	4.627491923618	-0.175449798015	15.192411848868
C	3.292251912500	-2.916423679046	14.089867716760
H	4.117174377144	-3.058280901532	14.799083871959
H	3.687456579480	-3.067661065697	13.080413535821
H	2.555171659374	-3.704096912624	14.283170715294
Si	-3.119039429855	-0.530954369080	11.841236896375
C	-2.560082847587	0.493873705839	10.354136588191
H	-3.447903690471	0.931241714744	9.880330806077
H	-2.041604800546	-0.101645984741	9.595689750574
H	-1.905975697942	1.319676458424	10.650535909249
C	-4.236647994676	0.589896157822	12.859892887579
H	-3.641464885168	1.349361518766	13.377420458196
H	-4.832241809230	0.055601751595	13.602666288847
H	-4.931963991779	1.111075141417	12.192910209870
C	-4.159223531614	-1.938010135932	11.111961272116
H	-4.917597871948	-1.512903530607	10.442692707444
H	-4.683022143679	-2.529193607373	11.869975719003
H	-3.542269921913	-2.622084566729	10.517389992052
Si	-2.245565973928	-2.505491811308	14.132380758590
C	-3.928761505568	-2.113321097416	14.901281810267
H	-4.109001208074	-2.840407081471	15.702984125394
H	-4.744727047302	-2.213163080403	14.178445585198
H	-3.990582595348	-1.117166426646	15.342853183600
C	-2.448410038261	-4.218210570303	13.343536974354
H	-1.484852183310	-4.663930386345	13.071592786093
H	-3.085880543129	-4.215437438097	12.454027008274
H	-2.914696185208	-4.879416511033	14.084984416188
C	-1.041667375004	-2.784199805580	15.561161870941
H	-1.539839155299	-3.363557128608	16.348538828760
H	-0.687533800060	-1.854537356834	16.007702641984
H	-0.164923815349	-3.355011286460	15.237096951634
180
Compound 6opt (na92B), E = -6530.04893193 Free E = -6528.62355206 (298.15 K), -6528.66605971 (348.15 K)
Si	-1.075947916411	-0.312722988185	-0.060116278596
Si	-2.739606848447	1.040738743017	-0.913438017169
Si	-2.584232036557	0.621181074449	1.399753946332
Si	-4.358822416468	-0.287932612605	0.177163771374
Si	1.077318072728	0.314507193949	0.064675222619
Si	2.741431716191	-1.040941804203	0.913778341641
Si	2.582021901318	-0.620484047469	-1.398651183280
Si	4.359443469471	0.287630728098	-0.179192754424
C	-2.439630320937	2.421870000021	-2.242967089206
C	-2.010590187658	1.508444725441	3.022270141024
C	-6.200717337232	0.170884331354	0.523442929281
C	-4.627660519490	-2.146865346891	-0.285597479350
C	2.442186210007	-2.421971231629	2.243594111328
C	2.004176823989	-1.508402211340	-3.019353993375
C	6.200562235381	-0.172048173632	-0.528415404157
C	4.629844793837	2.146632328981	0.282710443857
C	1.108414903885	-0.532607095464	-3.798386492741
C	-2.657764570289	1.835210761222	-3.644954015360
C	5.635362303510	1.035015743987	-3.454571514312
C	3.154400016736	-1.996729008758	-3.900567142828
C	-5.600455285032	-1.595016355925	-3.299826169343
C	6.726467052273	-1.770209284424	-3.262481083110
C	-2.691812109662	-2.092713326642	-2.885896904080
C	1.172407091499	-2.714604519916	-2.553888954890
C	8.462497048065	0.595124286165	-2.537505786014
C	2.938440003239	2.976353409962	-2.397631687019
C	-4.763901234575	-4.333058628335	-2.524741538633
C	-3.353818150517	3.632938749582	-2.027106815037
C	-6.576710737490	1.784195116317	-2.121295877935
C	-0.977878772461	2.874905739157	-2.098741354022
C	4.678725197958	4.979440869666	-0.977474449293
C	5.792865984889	-3.305303032159	-0.441745920861
C	-6.902301116052	-1.005370033265	-0.227565526219
C	6.154792689678	2.319962548272	-0.032723000252
C	-8.610846015954	2.104957165240	0.047944778739
C	-2.006199619899	-4.025776401435	-0.190786977149
C	2.008800536661	4.026483757956	0.191447100895
C	8.610246458131	-2.107614317669	-0.056546472687
C	-6.153041007148	-2.320935176056	0.027221479734
C	6.903954424531	1.004124117183	0.221027350274
C	-5.794758216896	3.304395371466	0.438460790616
C	-4.677801042810	-4.979860814147	0.973965834795
C	0.980608263420	-2.875631532213	2.099593408769
C	6.580088211281	-1.784735554458	2.116215755178
C	3.356729551447	-3.632834639250	2.028125761705
C	4.770687049068	4.333471846973	2.521133872738
C	-2.939683739111	-2.976720849476	2.396934189071
C	-8.465214161567	-0.599038234560	2.528542433601
C	-1.173058180603	2.711880474192	2.560063299779
C	2.699403961648	2.093474235900	2.887488240612
C	-6.733428802325	1.768124722946	3.256973199923
C	5.608258056487	1.595402374853	3.295153915242
C	-3.163346879986	2.000578635659	3.898029886089
C	-5.639102052046	-1.035786146685	3.450498897411
C	2.660245003976	-1.834693358166	3.645337303733
C	-1.121379270226	0.530208731877	3.805740352551
H	0.721781326099	-1.024840115289	-4.703442262909
H	5.943392305488	0.929336586687	-4.502403396801
H	-2.472924894002	2.610137681236	-4.403887140409
H	1.653329482096	0.365041371696	-4.114860782461
H	2.751722202810	-2.491245920548	-4.796931822278
H	-5.340793353638	-1.869759399699	-4.330723760726
H	6.886097444099	-1.584981038575	-4.332049132772
H	0.247582426144	-0.216311854983	-3.197970677508
H	-3.680934263507	1.469423951823	-3.790941508608
H	-2.535016504484	-2.709041268914	-3.780641009955
H	3.803683154829	-1.181700502346	-4.235807830541
H	-1.967948026580	1.008175937419	-3.848656029475
H	0.698343806444	-3.197608540349	-3.421227844182
H	8.780235124182	0.509010319916	-3.584163196641
H	4.569906156868	0.798663805822	-3.389627077530
H	-4.723558052304	-4.477898981727	-3.611907986265
H	5.761218380760	2.086555163992	-3.177859756544
H	-5.523544293239	-0.507767377810	-3.223120741743
H	-3.122188563664	4.405536522393	-2.775608644693
H	3.714645574239	2.885802805782	-3.159306616982
H	-6.645175848718	-1.882607193583	-3.139936321912
H	-0.766949879908	3.673145753380	-2.826562936787
H	5.789391301237	-2.319009177249	-3.160914527345
H	2.258287082779	3.779246950702	-2.710718983048
H	3.772589218271	-2.731277614424	-3.373395449143
H	-2.657272535991	-1.044212114310	-3.195810369598
H	7.538810063523	-2.416411261526	-2.916159164506
H	-6.786089029576	2.780052818108	-2.530799586239
H	-7.283430551934	1.085494623240	-2.581618678837
H	0.374651560215	-2.416111456155	-1.865020860855
H	-4.411176149548	3.380485630514	-2.131603562816
H	-5.568270989337	1.498091917617	-2.433538035564
H	2.356179470945	2.050120648927	-2.376743510512
H	8.514851305030	1.655733375585	-2.266220857353
H	-1.852793479669	-2.258636366222	-2.210329293900
H	-0.269771649478	2.060730451682	-2.281914047889
H	-5.773416392609	-4.611079258402	-2.200022582706
H	1.794158211556	-3.462086529762	-2.047559293456
H	-4.061070005060	-5.037642937407	-2.071593206454
H	9.188033876307	0.051034556906	-1.923956458224
H	5.499195366316	4.760132211953	-1.670447789298
H	-3.209064545152	4.076398439010	-1.036073701602
H	4.069485082217	5.770291230529	-1.432366446966
H	-0.771121706960	3.272105848875	-1.098803203506
H	-6.910340588489	-0.810273822371	-1.303885576476
H	6.307266964648	2.607245727570	-1.081846078403
H	6.226117951020	-3.682596705585	-1.371865649130
H	-2.127191383457	-4.405025024956	-1.208318536021
H	8.873316767268	-2.248538627124	-1.109381176250
H	-8.932593879758	3.000919214888	-0.497568321906
H	1.577201593254	4.830883167811	-0.417962639437
H	-5.807315540097	4.124549414628	-0.287857623427
H	-6.603224422703	-3.130547955499	-0.564023655515
H	-9.194642718052	1.259621878720	-0.335796576242
H	4.744170691510	-3.049123050021	-0.634469588314
H	-1.270541440670	-3.212953177707	-0.214435437439
H	7.955419405173	1.105547085994	-0.073686469807
H	5.116184387807	5.379458006843	-0.058226618391
H	-5.114235708463	-5.379477480566	0.054054511933
H	-7.954253521858	-1.107285771930	0.065222425232
H	1.273325987229	3.213585459851	0.218530922735
H	-4.746218088869	3.048736576001	0.632718726009
H	9.195383724953	-1.262539852031	0.325718674411
H	6.606314024071	3.129483409628	0.557633184054
H	5.806093511076	-4.125161275822	0.284890728208
H	-1.576162146259	-4.831479846909	0.418002908768
H	8.932371995738	-3.003586247056	0.488726765987
H	-8.876041553841	2.245239106433	1.100328429924
H	2.132197342023	4.407914856621	1.207881223942
H	-6.229702597705	3.681064335275	1.368042512843
H	-6.307162240470	-2.608436905557	1.076051587526
H	6.913877185880	0.809298718038	1.297372066012
H	0.774067006984	-3.273393607002	1.099830701679
H	-4.068984940924	-5.770870150440	1.429145085754
H	3.211860585441	-4.076843593496	1.037361962447
H	-5.499045238730	-4.760952717153	1.666148779786
H	-9.190270655620	-0.055405606756	1.914011688393
H	4.067030197208	5.038091727341	2.069330862587
H	-1.790027755582	3.460663117047	2.049807513582
H	5.779571623616	4.611289802154	2.194289074216
H	0.272146910773	-2.061660004438	2.282366563230
H	1.857702482379	2.268031013969	2.217452326594
H	-8.516028089396	-1.659575990887	2.256694100507
H	-2.356254190772	-2.051209769790	2.376605183579
H	5.572351580939	-1.497972741608	2.430156053182
H	4.414036601292	-3.380007238406	2.132231934340
H	-0.372515788138	2.410531922369	1.875672198733
H	7.288012486063	-1.086292051020	2.575076190628
H	6.789657642190	-2.780581677850	2.525651458913
H	-7.545869023436	2.413392718078	2.909151862876
H	2.662408645702	1.042748309495	3.189397122348
H	-3.777697450924	2.735863893097	3.367349138689
H	-2.260979086821	-3.780343231334	2.711322382698
H	-5.796864977360	2.318172114093	3.157560951198
H	0.770002486495	-3.673634676115	2.827765566170
H	6.652760387475	1.882512280352	3.133002274289
H	-3.716894222999	-2.884959149077	3.157431429774
H	3.125522205704	-4.405127452504	2.777070676763
H	5.530755179940	0.508156811519	3.219034133395
H	-5.763437220965	-2.087433201343	3.173509321587
H	4.732600432047	4.478485220158	3.608355640559
H	-4.573766928241	-0.798367127890	3.387310355410
H	-8.784791816555	-0.513695841549	3.574701496845
H	-0.702315011817	3.194377347025	3.429493476392
H	1.970215778638	-1.007741874488	3.848763690586
H	-3.815778580376	1.187361413010	4.231527040602
H	2.549572355526	2.703406266769	3.787814626703
H	3.683346168740	-1.468568219294	3.791041269103
H	-0.259090207765	0.210527616387	3.209177979587
H	-6.895106633845	1.582377814600	4.326148017972
H	5.350843752540	1.870651814795	4.326475679232
H	-2.763322577749	2.495249469234	4.795497783684
H	-1.670641140081	-0.365386665672	4.120505309797
H	2.475700793806	-2.609356536239	4.404613362099
H	-5.948940834779	-0.930498347711	4.497835501745
H	-0.736965432246	1.021735374160	4.712123595599
Si	6.703932568302	-0.095683986511	-2.384497587075
Si	-4.388856754961	-2.505038914959	-2.163946918609
Si	3.589432352095	3.455014657924	-0.685240599868
Si	-6.758239595151	1.823502137784	-0.237868990910
Si	6.758359665469	-1.824760145566	0.232483093663
Si	-3.588382369181	-3.455162748177	0.683627032600
Si	4.394665448955	2.505444518737	2.161403163573
Si	-6.707171979749	0.093778889146	2.378701423999
180
Compound 7opt (na92C), E = -6530.06541934 Free E = -6530.04269186 (298.15 K), -6528.66481116 (348.15 K)
Si	-2.010061677173	7.163906927152	14.076041479433
Si	-2.437244811066	5.758483328148	12.192472368614
Si	-0.454214674078	5.559788225118	13.355601104359
Si	0.018566108320	2.546124003734	11.750224706757
Si	0.848445838016	3.619256469634	13.679063767038
Si	-1.924635122754	3.554247838360	12.813528229142
Si	-0.899153893352	2.199371154929	14.476106835241
Si	-0.512307480477	0.405908915174	12.849270395154
C	-3.242801637399	7.671729492857	15.521255926663
C	-1.285927782486	8.953824365153	13.765516142138
C	-3.326014712179	5.905366739647	10.439891454758
C	0.745390632564	3.133970176519	10.033042205372
C	2.637392436852	4.126123891572	14.331736962757
C	-1.529794439761	2.304270088001	16.299682062987
C	0.783424702284	-1.048545964852	13.199165038079
C	-1.939419996418	-0.796509885082	12.186122188708
C	-2.839821356342	9.166309509786	15.767517290910
H	-3.676172853623	9.741403045340	16.189545248836
H	-2.035241756342	9.216397988524	16.518474047909
C	-2.336283268941	9.845224552365	14.493866288306
H	-1.934350827629	10.836319299074	14.740385467709
H	-3.194700642573	10.027074779370	13.840843518096
Si	-5.051571866871	7.533133208749	14.877169743081
C	-5.515438144468	5.772545578528	14.353937588803
H	-5.947235561094	5.219016185207	15.193546351972
H	-4.672949826255	5.189674735529	13.967727098810
H	-6.276313058974	5.819407981085	13.566005841555
C	-6.364806788229	8.060247460244	16.142405557400
H	-6.187323966896	9.070272358846	16.528398873049
H	-6.475899825669	7.380411384662	16.991526810798
H	-7.325018168591	8.080412129741	15.610079968357
C	-5.393263077079	8.740161959894	13.464170072156
H	-6.355372404563	8.492765933790	12.999056290945
H	-4.631096472659	8.725688380039	12.687237062358
H	-5.463979149572	9.766001585171	13.844713232565
Si	-3.216497532836	6.897552861514	17.278410360729
C	-4.202545569039	5.291214372047	17.410730338075
H	-5.277503013810	5.490842250523	17.467040935825
H	-4.030752704908	4.615742818121	16.571979794568
H	-3.918852465785	4.763627194845	18.328771001370
C	-3.976937267848	8.098690970276	18.539992523650
H	-5.027014317109	8.346812339635	18.377712594256
H	-3.410966097179	9.035443605684	18.593950187680
H	-3.899001984696	7.619755238075	19.525159691404
C	-1.500396156446	6.664008949504	18.036430893154
H	-1.616506498012	6.049088264165	18.937754053386
H	-0.757942923290	6.189176722280	17.397589279451
H	-1.103066377135	7.630781016482	18.362890498265
Si	0.452071210939	9.149308103130	14.593988581773
C	1.890890696109	8.918439764208	13.384663042614
H	2.019793998214	9.760142375917	12.698297607710
H	1.786457105635	8.006231692552	12.790477744435
H	2.812605712216	8.827661629687	13.972228545079
C	0.612628490584	10.870976704643	15.372144573111
H	1.635451556828	10.981755728303	15.753970300418
H	-0.066491620351	10.984197352130	16.225708481185
H	0.424495684479	11.694612305469	14.678261487455
C	0.838944693348	7.990227414587	16.034450488129
H	0.611760941526	6.939074013509	15.838705283673
H	0.299544878158	8.292711480242	16.934192360907
H	1.911685758588	8.064017636472	16.252740707184
Si	-1.129655798196	9.669866853946	11.991712786382
C	-0.404607124324	11.425252036797	12.046862210494
H	-0.469082662438	11.846964234659	11.035487539483
H	0.643598350952	11.473168031257	12.354639159912
H	-0.984379921345	12.078569452900	12.709140767049
C	-0.070891322768	8.677567117724	10.775601395689
H	-0.118318497682	7.598674562759	10.951817842947
H	0.977659708956	8.981294326572	10.829995948455
H	-0.413062406782	8.870468259055	9.752573606642
C	-2.824130409517	10.000715719749	11.205589184876
H	-3.363787622342	10.790631722927	11.739029803301
H	-3.481474605187	9.132650661686	11.142294982054
H	-2.656462201578	10.357365098587	10.181298355572
C	-2.601355323317	6.851865285367	9.479315471271
H	-3.185571700015	6.940129669203	8.551016601170
H	-1.607116406482	6.485414697194	9.208448899560
H	-2.485074591968	7.854409840213	9.886474871444
C	-3.449924068040	4.535252280911	9.781145103423
H	-3.972608629702	4.635904878775	8.817907728798
H	-4.019423231678	3.839584957741	10.400389008133
H	-2.474270676415	4.085376566052	9.580082355545
C	-4.745125676524	6.425773140333	10.716249192947
H	-5.305342288032	6.475898079384	9.770624636371
H	-4.752517134378	7.427036398306	11.151272579919
H	-5.296686959111	5.763436268446	11.392690226052
C	0.590129884830	4.660326863908	9.981822186922
H	1.112546233002	5.161860703062	10.804647987804
H	-0.457319505168	4.966259101436	10.032048145909
H	1.007605182713	5.044614143857	9.038753397705
C	0.028436426405	2.529190866235	8.819704126805
H	-1.053729488844	2.689001400579	8.845199251649
H	0.205616375786	1.455244028299	8.728563188361
H	0.407837105833	2.994893992147	7.898037329329
C	2.244041848199	2.811033611278	9.954333069286
H	2.655574940668	3.194646555366	9.008359731985
H	2.447170440556	1.738752369316	9.989464247246
H	2.798240269732	3.286967336821	10.770964268373
C	2.617509702409	4.148796051588	15.867030236774
H	3.593592256784	4.482776048590	16.250482919533
H	2.414457046988	3.162817692154	16.297410463810
H	1.864648748706	4.849014849444	16.248238678820
C	3.758658510772	3.217588960912	13.825748895821
H	3.841542379093	3.245459689429	12.734129628019
H	3.626320938282	2.179661636075	14.124636990399
H	4.722531734197	3.556604042396	14.234772640360
C	2.918679207110	5.544438274821	13.825424351415
H	3.920506949037	5.860311054053	14.152371170019
H	2.204850414918	6.272353543126	14.218849696937
H	2.889609315320	5.610047522272	12.730425546029
C	-1.258175520880	3.748221669601	16.726008898131
H	-0.185419117966	3.964964553213	16.760275135877
H	-1.722976431334	4.472892970243	16.049841925923
H	-1.662922682438	3.916968711197	17.732065337789
C	-0.783704002036	1.382832916409	17.270185464583
H	-1.154593344848	1.552908272276	18.291962066942
H	0.291865836811	1.585171526509	17.274035229069
H	-0.927415800276	0.323821889363	17.047642935908
C	-3.038920967753	2.039646029792	16.363868194063
H	-3.409015227041	2.234694662360	17.380742286716
H	-3.290606525804	1.009087006013	16.113091942445
H	-3.592017240079	2.688862338090	15.676699203506
C	-0.118790490450	-2.320061705505	13.084278276023
H	0.480309887510	-3.221598468135	12.894394344613
H	-0.640037173278	-2.505479650815	14.027445015949
C	-1.161912331878	-2.137511302915	11.987027715608
H	-1.843176614520	-2.999235140044	11.965452047894
H	-0.650665782993	-2.141830997966	11.018317695709
Si	2.116178628102	-1.124529917482	11.814820103517
C	3.462907886937	0.147302849557	12.148134194452
H	4.045396923259	-0.045240786821	13.053512016602
H	3.000689567837	1.132755125842	12.252792489461
H	4.159587044633	0.197021013761	11.303132903444
C	1.465935414310	-0.757599185624	10.081035195122
H	0.930633610708	-1.612836198698	9.658800011385
H	2.310544431515	-0.539251926554	9.415982532674
H	0.795566605469	0.102264593474	10.064989641331
C	2.844154450160	-2.859890165380	11.582685813862
H	2.074015605272	-3.550024786951	11.217625533076
H	3.313217973315	-3.307675915861	12.459410963441
H	3.605495913788	-2.789891281521	10.794757347514
Si	1.682817196366	-1.181183564967	14.897249320876
C	0.659577059073	-2.045458814326	16.237741865991
H	0.408003390788	-3.075118575455	15.959916772209
H	-0.260587416893	-1.541772096912	16.529463630592
H	1.301084704798	-2.098949839274	17.126771762470
C	2.291709568569	0.456331454513	15.601912064601
H	1.690983031039	1.308599667330	15.271811878770
H	3.330534896614	0.639983721084	15.314265282324
H	2.257288636438	0.422705526001	16.696652737325
C	3.214109932714	-2.306459109068	14.871371336293
H	3.622320442948	-2.295248108040	15.890654190866
H	4.014684777503	-1.992033238020	14.196372628697
H	2.954813318834	-3.345246643273	14.639603184377
Si	-2.837257773034	-0.451255184695	10.522358172654
C	-3.415296788532	1.314581873252	10.326312660109
H	-2.563032227568	1.994558921653	10.366926378957
H	-4.112060222997	1.627285256479	11.108074835646
H	-3.906239240299	1.443828367970	9.354211936987
C	-4.362152703524	-1.551805482765	10.265031553377
H	-5.212726141004	-1.278320780155	10.896360226005
H	-4.151273701802	-2.616493735009	10.410636102218
H	-4.675985155205	-1.418472353241	9.221773953114
C	-1.805444720886	-0.858180640898	8.988908869679
H	-2.444913023329	-0.654002150296	8.120608221904
H	-1.516864210644	-1.913598834887	8.936438987485
H	-0.906817835155	-0.253046029895	8.879392251264
Si	-3.296786834521	-1.050162283841	13.531483270349
C	-4.505376547423	0.400059989950	13.564550286614
H	-5.112398616725	0.354963028531	14.476382166164
H	-5.190455975777	0.373804344794	12.710682419128
H	-3.989665314213	1.367106165451	13.552921140308
C	-4.286865814917	-2.660401063638	13.341523190333
H	-3.635991382627	-3.528207872621	13.182848175112
H	-5.043131431540	-2.656196729228	12.555750645014
H	-4.802752819643	-2.823212593913	14.296910167551
C	-2.590612993412	-1.290711179685	15.266948845687
H	-3.387318986291	-1.163935561713	16.009674515167
H	-1.790244914049	-0.589483658865	15.502980684533
H	-2.199788606985	-2.306111889416	15.386163272203
180
Compound 8opt (na92D), E = -6530.08045033, Free E = -6528.65705913 (298.15 K), -6528.69990082 (348.15 K)
Si	-6.191616282315	-1.918893470226	2.010356143145
Si	-4.272074644045	-1.387373643505	1.126532318900
Si	-3.385696624097	0.326989879345	-0.232194482508
Si	-1.997415362234	-1.289117546524	1.725934357527
Si	-1.869921513149	1.030050055809	1.444960870784
Si	-1.488209834122	-0.996812115293	-0.582246794853
Si	0.009005587743	0.711219900728	0.048052665439
Si	1.509302198963	1.985069127837	-0.901329335731
C	-7.911347724673	-1.858550859345	1.176279065555
C	-6.570045167943	-3.086018229757	3.474054344216
C	-4.156578973604	1.574257187539	-1.474436144097
C	-0.856006838968	-2.348101574947	2.859835485495
C	-2.359659044195	2.354878747975	2.748236623398
C	-1.377591574511	-2.518989112056	-1.758645068166
C	2.531183112742	3.372737295523	-0.070924597434
C	2.613172385756	1.624308724414	-2.418219592480
C	-8.790339287492	-2.467130244373	2.323015588784
C	-8.029787541532	-3.534981717124	3.130619748977
H	-9.107458067475	-1.674853126394	3.009712103434
H	-9.718508191662	-2.900564871906	1.925593298707
H	-8.597711677881	-3.777422903184	4.039973925395
H	-8.004775767187	-4.458768149946	2.544593601962
C	3.496221007665	3.743157004111	-1.249788754705
C	3.860625362668	2.516833688453	-2.105922580338
H	3.023313821437	4.489014371009	-1.898096878425
H	4.415310611394	4.217176256327	-0.878428587019
H	4.355271933466	2.850492691827	-3.029036561171
H	4.609944723548	1.929753663780	-1.566461951569
Si	-6.543332512085	-2.052335684348	5.092663041184
Si	-5.467229673742	-4.645683693328	3.700245539438
Si	-8.557914479528	-0.096892818910	0.759761726662
Si	-8.017772466258	-2.966354716969	-0.390321924161
Si	3.193953920557	-0.185266864146	-2.719326220340
Si	1.702193487014	2.259804397997	-3.985870483617
Si	1.531733535705	4.936962266691	0.427526418583
Si	3.545761279940	2.752313531927	1.439094242465
C	-1.160341919015	-3.835577180928	2.638848028835
H	-0.926513240852	-4.139946699830	1.611631230351
H	-0.550187178609	-4.453356084883	3.314603544565
H	-2.210015608210	-4.078615199549	2.822688988900
C	-1.064397739226	-1.951322240519	4.327990496734
H	-0.461287139653	-2.595729941614	4.984856787139
H	-0.752268317519	-0.915050504915	4.501876219842
H	-2.106463219566	-2.036847438868	4.648380946809
C	0.606447271682	-2.066523392069	2.479087432947
H	0.823930511307	-2.342956421597	1.441272214311
H	0.867546279148	-1.008432323796	2.598281671351
H	1.275662606415	-2.650721702656	3.128949766123
C	-4.704928859388	0.832052884653	-2.699821837047
H	-5.437358517637	0.063489246444	-2.433555022153
H	-5.198482594499	1.539552595235	-3.382708376047
H	-3.898110384532	0.341334901937	-3.256441059282
C	-3.048716377305	2.541207915340	-1.918340421791
H	-2.646906281773	3.113043920417	-1.074765258178
H	-2.210079315859	2.019569076716	-2.390210849244
H	-3.452643324711	3.260188115756	-2.647157699176
C	-5.265380727225	2.364090893072	-0.767568059479
H	-4.866109883431	2.957687915486	0.062891242285
H	-5.746397078534	3.059186863566	-1.471840852489
H	-6.042187369496	1.714413052252	-0.359407776633
C	-1.625409032084	-2.080339469193	-3.208647087803
H	-1.501411838091	-2.935012871454	-3.890310639972
H	-2.646178096836	-1.700799761143	-3.333875851884
H	-0.941297119662	-1.293650039622	-3.538532126040
C	0.000490147287	-3.175884279664	-1.604946075955
H	0.145579066840	-3.560980936215	-0.588414085809
H	0.096717011940	-4.024912588369	-2.298129097153
H	0.819157967534	-2.482073940004	-1.812840666162
C	-2.468479593440	-3.526417279688	-1.360834594826
H	-2.339333425437	-3.893152840393	-0.336603674736
H	-3.473962140372	-3.095067060171	-1.430065933544
H	-2.430717536702	-4.395506740237	-2.035217546483
C	-1.378600816068	2.326729614015	3.927154187883
H	-1.626554848998	3.121152259982	4.646792229705
H	-1.428575368236	1.369761672139	4.459347667826
H	-0.340552681653	2.475570081733	3.614218591096
C	-2.377802579399	3.736306217236	2.081119190702
H	-3.140293648849	3.789705371722	1.295635750790
H	-2.610710975992	4.514587808794	2.823099561652
H	-1.419240755649	3.990492518797	1.623275034867
C	-3.770512917250	2.014760046171	3.252085792936
H	-4.508577154303	2.032469645448	2.442360261696
H	-3.814590513951	1.022874131849	3.713279519046
H	-4.083672816398	2.752061267841	4.006787738414
C	-4.858204647386	-1.239259767900	5.383499703918
H	-4.245377540705	-1.793472609512	6.100776339891
H	-4.298084838272	-1.153408554030	4.445510772870
H	-4.997842759787	-0.224154213659	5.772413919228
C	-7.827747138686	-0.665603959305	5.086869074193
H	-8.856064001419	-1.041409469888	5.053402142806
H	-7.718303387979	-0.088995979849	6.014262950655
H	-7.679362133826	0.022527865604	4.251248852243
C	-7.027328501730	-3.121720125380	6.582582011985
H	-6.316480152224	-3.921355029664	6.809017380174
H	-7.100093866037	-2.479894655798	7.469575581492
H	-8.011706507453	-3.581249520249	6.432738753379
C	-4.030630427921	-4.391978429762	4.901606363029
H	-3.406131576166	-5.293539465752	4.882624383516
H	-3.396564157339	-3.551060381535	4.617571310728
H	-4.351331991885	-4.234649196955	5.935134335764
C	-6.537298780174	-6.033330847386	4.419669116304
H	-5.897915077297	-6.891380008904	4.661653495396
H	-7.050271404702	-5.728604498973	5.337544946178
H	-7.295888813154	-6.378803314794	3.708799557374
C	-4.699328354307	-5.322533563484	2.108117083681
H	-3.847282449382	-5.961106937240	2.372671597416
H	-5.407296063957	-5.945584898501	1.552809686555
H	-4.337742804799	-4.535768514485	1.436545476120
C	-6.790213701643	-2.476563585560	-1.743818278373
H	-7.221135806182	-1.781634263564	-2.470292612904
H	-5.887245752685	-2.023813067669	-1.318070130301
H	-6.475035837974	-3.375582946180	-2.286541216089
C	-9.781815570998	-2.934207606559	-1.090593521207
H	-10.092987615809	-1.958573588112	-1.474356481754
H	-9.842803936875	-3.651091751767	-1.919080883640
H	-10.514330183363	-3.246923256114	-0.336883635431
C	-7.703675500038	-4.791226995195	-0.021413591835
H	-6.721898770918	-4.945703031278	0.429959294051
H	-8.465296025288	-5.232008328062	0.630567541115
H	-7.724318281179	-5.342499262336	-0.970090722718
C	-8.295608937351	0.408842255263	-1.044035469652
H	-8.541110720575	1.473483233458	-1.141479099635
H	-7.264883577287	0.279842838695	-1.378086905583
H	-8.941057540679	-0.142207603972	-1.734278265636
C	-7.786986414399	1.265998295234	1.824708111568
H	-7.945039699269	2.237522532661	1.340323843408
H	-8.257815997829	1.315836473133	2.811755842971
H	-6.709715099772	1.130521082375	1.970574682523
C	-10.426391137700	-0.038810389519	1.062566129765
H	-10.815668686109	0.931598507212	0.730317960562
H	-10.958533419744	-0.819694770227	0.509608442081
H	-10.676093424090	-0.147947187947	2.123658495599
C	-0.055077189830	5.171731541539	-0.578372476542
H	-0.722722012744	5.862272925786	-0.048479654275
H	0.155065608332	5.612234664760	-1.558253417584
H	-0.596131702061	4.232712831565	-0.738098829370
C	1.029939420722	4.979209227617	2.250223903201
H	0.338790730968	5.818216115167	2.397191803139
H	0.514535971287	4.072142864367	2.569817168918
H	1.881639619442	5.132887761836	2.919394406037
C	2.598889727761	6.473443966974	0.132407246083
H	2.804000401129	6.635261607123	-0.931473626673
H	2.066054239396	7.357870709317	0.503340013710
H	3.559020604388	6.417985503348	0.655553205855
C	2.480270578024	2.034615713197	2.827073428787
H	2.191693433350	2.785992367052	3.567511994196
H	1.572409803304	1.563978760869	2.432208821691
H	3.048791626310	1.254038164434	3.346439519920
C	4.609543797697	4.164218134036	2.130044569598
H	4.032294335821	4.985166736837	2.564859984619
H	5.257188396647	3.760749104871	2.918579885832
H	5.263381913628	4.586326706825	1.357636374536
C	4.793671222573	1.412028900553	0.980000847315
H	5.575435731782	1.771065943014	0.302286023716
H	5.286559707798	1.069776736002	1.898784872350
H	4.303141809525	0.548929525375	0.526125701826
C	1.346990476600	4.114983271118	-3.918934805765
H	0.724445347248	4.378413087403	-3.060512389074
H	2.258244409926	4.721974388843	-3.890952309720
H	0.794498910992	4.392624862106	-4.825716503406
C	2.789167340586	2.053429133881	-5.526372957306
H	3.003018588037	1.013127295476	-5.787082553817
H	2.279451410434	2.513182497729	-6.382412779892
H	3.747780097646	2.571490014621	-5.402863992826
C	0.035414130517	1.395356689772	-4.232903700507
H	0.086121673715	0.595217236149	-4.977437050053
H	-0.327411500260	0.966628347729	-3.291942910029
H	-0.713221524256	2.121749038873	-4.569198662761
C	2.086048990078	-1.155301722681	-3.904364000174
H	2.439751909994	-2.193382493044	-3.927267717570
H	1.045336473086	-1.173740131323	-3.578105244287
H	2.108376645122	-0.777120724843	-4.930135605007
C	3.344225812734	-1.253696898026	-1.164102167878
H	3.337811189623	-2.309301637579	-1.463181390694
H	4.288683549351	-1.073861492229	-0.641148461376
H	2.525619882906	-1.098757228587	-0.452306769429
C	4.915311196511	-0.133046861566	-3.508488468736
H	5.209582780519	-1.150401573106	-3.794846677953
H	4.941171241986	0.488924590435	-4.408999384226
H	5.674536078145	0.245946011120	-2.815631256678
119
Compound 9opt (na92E), E = -4449.02678011, Free E = -4449.00912931 (298.15 K), -4448.11966405 (348.15 K)
Si	-0.327799831163	0.940080297745	3.270524344457
Si	-0.191425068601	-0.742372052075	1.570046434209
Si	-1.446495855230	1.717451106465	1.313362040317
Si	-2.222318481823	-0.335054352232	0.402834093726
Si	-1.079825192823	0.005861991403	-1.582406104416
Si	0.974935478019	-0.181505502953	-0.446552637843
Si	-0.033272492774	1.906334670620	-0.638776990577
C	1.149326083848	1.929599392736	4.004237638543
C	-1.164522466908	0.413646554434	4.961110651312
C	-3.914548138041	-1.194109650626	0.702154824572
C	-1.685766295883	-0.394628131542	-3.369984240302
C	2.562889524339	-1.111311852984	-1.038680809738
C	0.368358849488	3.558960833818	-1.565578130311
C	1.187027486290	1.336184941764	5.447660275732
C	-0.233737630572	1.168617272211	5.982679324055
H	1.692551538864	0.365067242113	5.444626396728
H	1.761378713166	1.972397809273	6.132732083933
H	-0.211682209176	0.657504187120	6.954111114216
H	-0.622757059549	2.169219132708	6.194936869553
Si	-0.930656958008	-1.464692297576	5.339308482278
Si	-2.999894230307	0.910968399866	5.381716799930
Si	2.895419919644	1.641371235166	3.280849169388
Si	0.703641749141	3.800944016969	4.115464166235
C	2.533720030808	-2.522695316047	-0.434004367277
H	3.396085458308	-3.103794230195	-0.793829618191
H	2.585292957565	-2.497785641160	0.661079155153
H	1.624154284034	-3.068416778435	-0.714312513115
C	3.834262408302	-0.381621764403	-0.592403807095
H	3.884666689439	0.634106382217	-1.000714247160
H	3.897402234246	-0.308517404917	0.496657863983
H	4.722709543044	-0.929778407356	-0.940840746619
C	2.540234440872	-1.206989713739	-2.569643027269
H	3.459434584437	-1.692161307685	-2.930998384673
H	1.689786254356	-1.802532097556	-2.918949198634
H	2.480586560343	-0.218881054449	-3.043025980885
C	-0.598861732780	-0.154350598850	-4.424181611794
H	0.276166092944	-0.790683167311	-4.263638685553
H	-0.996682821416	-0.385162776190	-5.423726858785
H	-0.262090182912	0.886337611973	-4.438485807303
C	-2.104041000669	-1.873421994192	-3.401144218180
H	-2.896410587080	-2.091224100152	-2.675311272933
H	-2.488204897651	-2.135864831406	-4.398439392925
H	-1.259210602162	-2.537782551007	-3.183252591305
C	-2.899921926840	0.495472784234	-3.677963330137
H	-3.700326821064	0.372115789405	-2.940012839733
H	-2.627575786124	1.556924886350	-3.697046229043
H	-3.314670226190	0.238803871951	-4.664568653484
C	0.301552427941	3.291186371775	-3.075498434760
H	0.540393547092	4.209800181656	-3.632459886506
H	1.025202585829	2.525528700375	-3.382633560968
H	-0.695863198129	2.961653146448	-3.386008425916
C	-0.689292753485	4.601551199780	-1.178250510104
H	-0.662190781924	4.832821739869	-0.106972786119
H	-0.512516382721	5.539713357000	-1.725325364474
H	-1.703696995997	4.261313639474	-1.420735242160
C	1.771801758687	4.074222218741	-1.221588465181
H	1.873452125545	4.329530079730	-0.164053786038
H	2.544990723029	3.334672999200	-1.460677694376
H	1.986298274292	4.984804451509	-1.801278333776
C	-4.428571248202	-0.822514888081	2.091646669353
H	-3.671221019306	-1.014283960523	2.856099525868
H	-4.703313482334	0.234859880577	2.151471898345
H	-5.319463541674	-1.415780687872	2.347493195739
C	-4.913066405454	-0.727375756225	-0.365581018187
H	-4.604164107698	-1.029767411657	-1.372816453644
H	-5.899758254573	-1.176269894913	-0.177407970799
H	-5.037235761973	0.362456088946	-0.362002684587
C	-3.714254676297	-2.713096592303	0.596257672705
H	-4.680790867808	-3.227817465000	0.705014159752
H	-3.291971972444	-3.003785863298	-0.373854335639
H	-3.045374189053	-3.089724677169	1.377382856420
C	0.837485963343	-2.107701335576	5.128412737387
H	0.818438154181	-3.186525039288	5.331518569831
H	1.223660940250	-1.969296962889	4.115344254671
H	1.542270449586	-1.658637775499	5.835868886099
C	-1.976526169706	-2.640759681647	4.295436443727
H	-3.050491761684	-2.582610748593	4.481114193899
H	-1.796245339544	-2.482165302456	3.227164925951
H	-1.653073296806	-3.663215541215	4.529168351247
C	-1.298857175503	-1.771355958605	7.182899680714
H	-1.589751418013	-2.819915491561	7.322447531351
H	-0.399415021311	-1.602590459306	7.786580535449
H	-2.096547670903	-1.149341075440	7.599060597563
C	-4.236361138273	-0.507892258349	5.655276936757
H	-4.566216113950	-0.992696851997	4.734895521402
H	-3.901799580766	-1.283087603523	6.349261994869
H	-5.122084661215	-0.035153413512	6.100178210847
C	-3.026824208679	1.801944970107	7.061247546283
H	-4.076840069175	1.951821286415	7.341714504563
H	-2.552098224371	1.216005481159	7.856089237130
H	-2.553217344293	2.789204991547	7.047292030955
C	-3.866619649706	2.066871797078	4.157788910925
H	-4.942634337703	1.855190329809	4.177228713426
H	-3.727728375741	3.116271393626	4.432198456612
H	-3.519105611180	1.948487983048	3.127304771018
C	-1.132391782159	4.206121367880	4.314992305383
H	-1.216081349301	5.293862475545	4.439256352879
H	-1.716110610533	3.925119130937	3.433628250453
H	-1.594520807890	3.741956126305	5.189508515663
C	1.531243946206	4.573437568321	5.634590128068
H	2.604534292139	4.375438650880	5.702180403469
H	1.390919856046	5.660832609941	5.594944168573
H	1.064256724073	4.219601602662	6.561454398648
C	1.201588930736	4.761208373266	2.570599208223
H	0.900705086498	4.212343137635	1.672660374628
H	0.675619374299	5.723284256747	2.564923512347
H	2.274346331677	4.965281351216	2.508248337932
C	3.229923373489	2.318011106623	1.557879680860
H	4.190280203510	1.916969910926	1.214338265902
H	2.468741790183	2.021875982599	0.829733897653
H	3.311111996034	3.406443462653	1.544728737204
C	3.317874013425	-0.202619425416	3.243160842916
H	2.651331092593	-0.764704623175	2.580065289607
H	4.341554500274	-0.317620816260	2.865257567883
H	3.281244189621	-0.671025734770	4.231072112213
C	4.187148865932	2.454705966916	4.405441863167
H	4.167120814125	3.546908340421	4.320782859181
H	4.063548120950	2.191774804936	5.461517628681
H	5.185905157271	2.122281999739	4.095827822012
61
Compound 2opt (na92F), E = -2080.99641561, Free E = -2080.53349289 (298.15 K), -2080.55075778 (348.15 K)
Si	0.199633383544	2.817750517851	2.122799252992
C	-0.364913837245	4.147640326951	3.381866163164
C	0.625917532883	4.081827220004	4.586256032277
C	1.190225500516	2.657547131083	4.714924817851
C	1.543669269543	2.115853779831	3.298823509696
Si	-0.351240266463	5.829346299569	2.450867802606
Si	-2.163518776235	3.814435023799	3.975754649906
Si	3.307070193853	2.645009187092	2.734770603321
Si	1.432290979593	0.205991639965	3.174850126185
H	1.459503887144	4.772837897176	4.418130416694
H	0.170273110924	4.398647311914	5.533997403770
H	2.046173896332	2.643074508248	5.405418970737
H	0.428403253887	2.015529878115	5.181869795992
C	-0.338664604038	-0.452651416831	3.298167798818
H	-0.990550767092	-0.072948682444	2.503232449731
H	-0.296239162395	-1.544342181029	3.190734820027
H	-0.807436337103	-0.238541015521	4.262424237747
C	2.329127310454	-0.612255814887	4.627038722412
H	1.995407569173	-0.168312052672	5.572923277226
H	2.072628330739	-1.678529945992	4.657709716840
H	3.417404561051	-0.529546195158	4.583799391870
C	2.049314968552	-0.428644968740	1.502457571115
H	1.927734332036	-1.518381046993	1.467840297555
H	1.436997839532	-0.002345205257	0.698590999008
H	3.096012553809	-0.204004972931	1.280995061551
C	3.376798749222	2.949586624156	0.868354802557
H	3.038814622080	2.076852202431	0.299904289677
H	2.756289915456	3.799088975788	0.557682761294
H	4.409232126255	3.168445846626	0.568414050898
C	3.916751232345	4.196152863499	3.633313540898
H	3.837760496365	4.087547403762	4.721106702512
H	4.981096717926	4.320925915107	3.396673590614
H	3.407038214406	5.115722602832	3.344561443329
C	4.679243666181	1.406531755547	3.166543586412
H	5.621908852113	1.822466819515	2.787495853785
H	4.782714767280	1.306925054958	4.253108514141
H	4.567138025064	0.406001085559	2.742214141111
C	-2.504659532196	2.015256878122	4.442135167565
H	-2.487875875043	1.346215177561	3.576971942405
H	-1.799733752125	1.632271960716	5.186861597461
H	-3.508618779530	1.958968918420	4.882368751790
C	-2.513321598967	4.782164005284	5.566476248870
H	-3.590139922844	4.737749756191	5.773323586970
H	-2.001188288553	4.325984196166	6.421541623433
H	-2.223013344947	5.834492888378	5.521830612548
C	-3.479867199492	4.230909496388	2.684662091613
H	-3.325656924048	3.656417795516	1.764264117569
H	-4.457513469599	3.944573653773	3.092397897502
H	-3.529326089345	5.291539523385	2.420913270698
C	-1.048481131481	5.720283919914	0.695114689069
H	-1.170330189208	6.738589406250	0.303472190118
H	-0.354900604616	5.189090091574	0.033391363724
H	-2.014777898706	5.216211043531	0.625536658970
C	1.414586067187	6.471403986831	2.229754500535
H	1.373039160895	7.381777107932	1.618625355509
H	1.894400021590	6.737600685788	3.177570605408
H	2.057790273472	5.756294299585	1.706054490759
C	-1.251152906766	7.214126490131	3.378315238692
H	-0.833343089824	7.356189225905	4.381767799410
H	-1.108470461733	8.151911478000	2.826451128938
H	-2.328487441809	7.050238031742	3.479497884144
